# Supplementary material
Source: PubMed Central journal article supplement (PMC6309244)
Supplement: NIHMS1512099-supplement-Supplement1.pdf [file NIHMS1512099-supplement-Supplement1.pdf]

## Supplementary Appendix

This appendix has been provided by the authors to give readers additional information about their work.

Supplement to: Duncavage EJ, Jacoby MA, Chang GS, et al. Mutation clearance after transplantation for myelodysplastic syndrome. *N Engl J Med* 2018;379:1028-41. DOI: [10.1056/NEJMoa1804714](https://doi.org/10.1056/NEJMoa1804714)

## **Table of contents**

Supplement to: Duncavage EJ, Jacoby MA, Chang GS, *et al.* Mutation clearance after transplant for myelodysplastic syndrome.

### **Contents**

|                                                                                                                      |          |
|----------------------------------------------------------------------------------------------------------------------|----------|
| <b>Supplementary Methods</b>                                                                                         | Page 3   |
| <b>Supplementary Results</b>                                                                                         | Page 7   |
| <b>Supplemental Figure Legends</b>                                                                                   | Page 9   |
| <b>References</b>                                                                                                    | Page 13  |
| <b>Figure S1.</b> Number and Distribution of Tracked Mutations at the Initial and Pre-transplant Time Points         | Page 15  |
| <b>Figure S2.</b> Sequencing Metrics                                                                                 | Page 16  |
| <b>Figure S3.</b> Mutation Clearance of selected Genes at Day 30 Post-Allogeneic Hematopoietic Cell Transplant       | Page 17  |
| <b>Figure S4.</b> Association of Mutation Clearance at Day 30 post-alloHCT with Outcomes                             | Page 24  |
| <b>Figure S5.</b> Association of Mutation Clearance at Day 100 post-alloHCT with Outcomes                            | Page 25  |
| <b>Figure S6.</b> Association of Mutation Clearance with Outcomes Using a Variant Allele Frequency Threshold of 0.1% | Page 26  |
| <b>Figure S7.</b> Association of Mutation Clearance with Outcomes Using a Variant Allele Frequency Threshold of 1%   | Page 27  |
| <b>Figure S8.</b> Association of Mutation Clearance with Outcomes Using a Variant Allele Frequency Threshold of 2.5% | Page 28  |
| <b>Figure S9.</b> Association of Mutation Clearance with Outcomes Using Any Detectable Variant Allele Frequency      | Page 29  |
| <b>Figure S10.</b> Association of Overall Survival with Mutation Clearance Determined by a 40 Gene-Panel             | Page 30  |
| <b>Table S1.</b> Recurrently Mutated Genes in AML and MDS                                                            | Page 31  |
| <b>Table S2.</b> Summary of Clinical Characteristics and Sequencing Data                                             | Page 37  |
| <b>Table S3.</b> Somatic Mutations (SNVs and indels) by Exome Sequencing                                             | Page 38  |
| <b>Table S4.</b> Validated Somatic Mutations by Ultra-deep Error-Corrected Sequencing                                | Page 88  |
| <b>Table S5.</b> International Prognostic Scoring System-Revised Classification System                               | Page 119 |
| <b>Table S6.</b> 40 Gene List                                                                                        | Page 120 |

## **Supplementary Methods**

### **A. Study Design**

All consecutive patients with adequate samples that underwent allogeneic hematopoietic cell transplant (alloHCT), from any source, at Washington University from 11/2002-05/2015 were included in the study. Adequate sample was defined as having sufficient DNA available from the bone marrow and skin pre-alloHCT, and bone marrow on at least day 30 after transplant for sequencing studies. In 58 patients, an additional bone marrow biopsy was performed within a median of 23 days prior to transplant (range, 6-61), with no intervening treatment between biopsy and transplant, and could be used to measure tumor burden at the time of transplant (i.e., pre-transplant sample). In addition, the initial banking sample for 9 patients also met the definition of the pre-transplant time-point (i.e., biopsy was performed within 60 days prior to transplant and had no intervening treatment) and were annotated in Supplementary Table S2. A bone marrow sample was available for 58 patients on day 100 post-alloHCT. The study was approved by the institutional review board at Washington University in St. Louis and was conducted in accordance with the provisions of the Declaration of Helsinki. All of the patients who were enrolled provided written informed consent that explicitly included genome sequencing and data sharing with qualified investigators.

Disease progression was defined prior to sequencing as follows: the presence of  $\geq 5\%$  myeloblasts in the marrow or evidence of extramedullary disease; loss of donor chimerism or re-emergence of pre-transplant morphologic abnormalities prompting any intervention by the treating physician (such as withdrawal of immunosuppression, donor lymphocyte infusion, or chemotherapy); or re-emergence of pre-transplant cytogenetic abnormalities. The reviewers were blinded to the results of the sequencing studies. Database lock was 4/16/2017. For progression-free survival, in the absence of progression, and for overall survival, patients were censored at the time they were last known to be alive. Morphologic review for all time points was provided by a board certified hematopathologist. In most cases the blast count was determined by morphological assessment of the Wright Giemsa stained bone marrow aspirate

smears, however in cases where the aspirate was hemodilute or of low technical quality, the blast count was estimated by CD34 and/or CD117 immunohistochemically staining of the bone marrow core depending on the blast phenotype detected by flow cytometry.

Eight patients who had previously undergone ultra-sensitive, error-corrected sequencing prior to transplant and at day 30 post-alloHCT on a previous study were included in the outcome analyses.<sup>1</sup> Their UPNs were as follows: 145094, 147457, 280837, 368402, 435866, 499258, 624702, and 829970.

## **B. Enhanced Exome Sequencing and Somatic Variant Identification at Initial Banking**

We sequenced the exome of 90 patients with a history of MDS, described above, at initial banking. HiSeq2500 sequencing systems (Illumina, CA) were used to sequence DNA, captured using SeqCap EZ Exome v3.0 Kit (Roche, CA) with additional spike-in probes targeted to 285 genes recurrently mutated (or RMGs) in myeloid malignancies, or enhanced exome sequencing (EES).<sup>2</sup> Exome sequencing data were aligned to the human reference sequence build GRCh37-lite-build37 using bwa<sup>3</sup> version 0.5.9 with “-t 4 -q 5” parameters, then merged and de-duplicated using picard version 1.46 (<https://broadinstitute.github.io/picard/>).

Somatic variants in tumor samples were called against normal skin samples we sequenced in EES from the same patient. In detail, single nucleotide variation (SNV) was detected using the union of four variant callers: 1) samtools<sup>4</sup> version r982 (params: mpileup - BuDS) filtered by var-filter-snv v1 and false-positive-vcf v1 (params: --max-mm-qualsum-diff 100 --bam-readcount-version 0.4 --bam-readcount-min-base-quality 15), then intersected with Somatic Sniper version 1.0.4<sup>5</sup> (params: -F vcf -G -L -q 1 -Q 15) and processed through false-positive filter v1 (params: --bam-readcount-version 0.4 --bam-readcount-min-base-quality 15 --min-mapping-quality 40 --min-somatic-score 40), 2) VarScan<sup>6</sup> version 2.3.6 (params: --nobaq --version r982) filtered by varscan-high-confidence filter v1 and processed through false-positive filter v1 (params: --bam-readcount-version 0.4 --bam-readcount-min-base-quality 15), 3) Strelka<sup>7</sup> version 1.0.11 (params: isSkipDepthFilters = 1), and 4) MuTect version 1.1.4 (--number-of-chunks

50) with COSMIC v54.<sup>8</sup>

For insertions and deletions (INDELs), we used the union of four variant callers: 1) GATK<sup>9</sup> somatic-indel version 5336, 2) pindel<sup>10</sup> version 0.5 filtered with pindel-somatic-calls v1 and VAF filters v1 (params: --variant-freq-cutoff=0.08), and with pindel-read-support filter v1, 3) VarScan<sup>6</sup> version 2.3.6 (params: --nobaq --version r982) filtered by varscan-high-confidence-indel v1 and 4) Strelka<sup>7</sup> version 1.0.11 (params: isSkipDepthFilters = 1).

SNVs and INDELs were further filtered by removing artifacts found in a panel of 905 normal exomes, removing sites that exceeded 1% frequency in the Exome Aggregation Consortium (ExAC) collection,<sup>11</sup> and then using a Bayesian classifier (<https://github.com/genome/genome/blob/master/lib/perl/Genome/Model/Tools/Validation/IdentifyOutliers.pm>) and retaining variants classified as somatic with a binomial log-likelihood of at least 3 (params: --llr-cutoff 3). As a result, germline mutations, low-quality mutations, sequencing artifacts, and ambiguous variant calls owing to paralogous DNA sequences and unstable reference sequence contigs were removed.

A total 3,811 somatic variants were called from 90 patients at initial banking in the somatic variation discovery pipeline, described above, including 3,414 SNVs, 257 DELs, and 140 INSS. An average of 42 variant were called per patient (minimum 3 to maximum 644 variants called). Exome sequencing data was deposited in the dbGAP database (phs000159.v9).

### **C. Ultra-deep error-corrected sequencing**

Probes for ultra-deep error-corrected sequencing were designed to target all somatic mutations detected by enhanced exome sequencing (or EES) using the Agilent SureDesign web interface. Genomic DNA was first digested using a mixture of restriction endonucleases found in the Agilent HaloplexHS kit (Agilent Technologies, Santa Clara, CA). Probes (designed to cover both DNA strands), 10bp degenerate barcodes, and sample-specific indexes were synthesized by Agilent Technologies. Following a 16 hour hybridization and magnetic bead enrichment, libraries were amplified for 23 PCR cycles using primers with tailed Illumina sequencing motifs.

Purified libraries were then pooled and sequenced 16 per lane (initial samples and skin) or 8 per lane (Pre, Day 30, and D100) time points on a HiSeq 4000 instrument. Pools were designed to minimize the effect of potential 'index swapping' by including only unique UPNs in each lane; samples from initial time points (high expected VAFs) were excluded from pools with day 30 and day 100 follow-up samples (low expected VAFs). Further, follow-up samples were pooled to avoid including samples in the same pool with the same recurrent somatic mutations when possible (e.g., only one sample with *U2AF1* S34F per pool). Samples were sequenced on an Illumina HiSeq 4000 instrument using 2x150bp reads (Illumina, Carlsbad CA).

Barcoded FASTQ data was demultiplexed using a custom UMI-aware script that merges degenerate barcode information to FASTQ files. Data was then aligned to build GRCh37-lite-build37 using *bwa mem* (version 7.9.a) with default parameters. Aligned BAMs were then analyzed using the Barcrawler pipeline (Duncavage and Abel, <https://github.com/abelhj/gatk>), a GATK locus walker implemented in Java, with the following parameters *-mmq 20 -mbq 20 -minCtBC 3 -dcov 1000000 -discardN 1 -minOffset 3 -maxNM 10*. The resulting list of variants were filtered to include only mutations present in at least 3 unique read families (each with a minimum of 3 members in which the variant was present in >90% of member reads). A background error-rate was further calculated for every targeted position by compiling the number of non-reference bases detected at that position across all cases minus the one with the mutation. For example in UPN 491309, a *TP53* p.Y243C mutation (chr17: 7577580 T->C) was detected with a VAF of 0.54% (80 variant read families out of 14,682 total). The remaining sequenced cases (all cases minus the index case) were then queried at that position and demonstrated the reference base, T, in 3,234,744 unique read families and the variant, C, in 9 total read families. A binomial distribution was then used to determine whether read counts of the observed mutation in the index case were statistically different from background. In the example, 80 out of 14,682 are statistically different from the background rate of the same mutations across all other cases (9 out of 3,234,744) with a P-value of <0.0001. P-value

threshold of  $<0.0001$  was used for all binomial comparisons. Detected mutations with a P-value  $>0.0001$  compared to the background error were excluded from the analysis. Probes were considered validated if the SNV detected by EES was present in a marrow prior to transplant with a VAF of  $\geq 1\%$  and had a VAF of  $\leq 10\%$  in the normal skin sample and had  $\geq 10x$  unique coverage at either the day 30 or day 100 time points. A total of 2,517 SNVs out of 3,414 targeted SNVs passed filter. The majority of positions that failed to validate were due to poor coverage at skin and prior to transplant time points or SNPs that were originally classified as 'somatic' variants based on lower coverage EES data. Indel calls detected by EES were not evaluated by error-corrected sequencing.

There was a wide range in unique coverage obtained across targeted positions in day 30 and day 100 samples, likely due to differences in GC content and the number of probes that could be designed to each targeted region. Therefore, a conservative VAF threshold was chosen to minimize potential variant detection bias due to differences in coverage. A maximum VAF cut-off of 0.5% resulted in  $>99\%$  of day 30 and day 100 samples having a unique coverage depth that would allow detection of mutations with a VAF of  $\geq 0.5\%$ . A single case (day 30, 717045) had lower unique coverage due to limited available DNA. To determine whether the choice of a 0.5% maximum VAF cut-off biased the results, we compared multiple VAF cut off thresholds (2.5%, 1%, 0.1%, and no cut-off [i.e., any detected mutation]) and found that day 30 sequencing results remained a strong predictor of progression (Supplemental Figures S5-S8).

## **Supplementary Results**

### **A. Treatment with a hypomethylating agent prior to alloHCT is not associated with progression**

We previously reported that pre-transplant therapy with azacitidine likely influenced the mutation spectrum (e.g., C to G transversions) and evolution of emergent subclones after alloHCT.<sup>1</sup> This remains a potential mechanism that may affect post-alloHCT progression. We

were not able to address whether putative hypomethylating agent-induced mutations influence progression in the current study because our sequencing strategy was not designed to identify emerging subclones. However, we did examine whether there was an association with therapy prior to transplant and progression in our cohort. When comparing patients who received a hypomethylating agent (e.g., azacitidine or decitabine) at any point pre-transplant versus no therapy, the hazard ratio for progression was 0.73 (95% confidence interval 0.41, 1.30; P=0.28). When compared to patients who received a hypomethylating agent at any point pre-transplant versus a therapy not containing a hypomethylating agent, the hazard ratio for progression was 0.94 (95% confidence interval 0.368, 2.40; P=0.90). While this analysis is limited by the use of non-uniform treatments, doses, and schedules, we did not observe an association with progression whether a patient received therapy prior to transplant, and if that therapy included a hypomethylating agent.

## **B. Post-alloHCT mutation VAF level is associated with progression**

We performed an analysis using max VAF at day 30 post-alloHCT as a continuous variable (i.e., without thresholds) and it remained significantly associated with progression. For each increase of 1% in max VAF at day 30 post-alloHCT, the hazard of progression increases by about 4% (HR=1.04; 95% confidence interval, 1.02 to 1.05; P<0.001).

We also compared the cumulative incidence of progression for patients with a max VAF  $\geq 0.5\%$  versus max VAF  $> 0$  but  $< 0.5\%$ . We found that 18 patients had day 30 VAFs  $< 0.5\%$  but  $> 0\%$ . Six of these 18 patients progressed with a median of 195 days between detection of a day 30 post-alloHCT mutation and progression. The hazard of progression is about 2.5 times greater in patients with day 30 max VAF  $\geq 0.5\%$  versus those with detectable but lower max VAF ( $> 0$  and  $< 0.5\%$ ) with a 95% confidence interval of 1.02 to 6.07 (P=0.046).



**Supplementary Figure 1. Number and Distribution of Tracked Mutations at the Initial and Pre-transplant Time Points.** Panel A shows the distribution of the total number of single nucleotide variant (SNV) mutations validated by error-corrected sequencing at initial sampling for patients with (n=34) or without (n=51) progression or death at one year. Panel B shows the distribution of the total number of SNV mutations validated by error-corrected sequencing at pre-transplant for patients with (n=32) or without (n=35) progression or death at one year. Panel C shows the distribution of mutation VAFs at initial sampling. Panel D shows the distribution of mutation VAFs measured pre-transplant. In Panels A-D, UPN 147457, which had 482 mutations, was omitted for clarity. Nine patients were included in both the initial sampling and pre-transplant data because they had an initial banking sample that also met the definition of the pre-transplant time-point defined in the Supplementary Appendix. They are annotated in Supplementary Table S2.

**Supplementary Figure 2. Sequencing Metrics.** Panels A and B show box and whiskers plot of coverage depths of non-overlapping 228,531 regions of interest targeted in enhanced exome sequencing. The line represents the median coverage depth; boxes represent upper and lower quartiles; lines represent minimum and maximum coverage values. Bone marrow samples (Panel A) and skin (Panel B, normal DNA source) are denoted by their unique patient number (UPN). Mean tumor coverage of 239x in the exomes and 1,299x over recurrently mutated genes (or RMG) in myeloid malignancies. Panel C and D show sequencing coverage depths obtained for ultra-deep error-corrected sequencing of the skin (Panel C) and bone marrow at initial sampling (Panel D). The total mean tumor coverage was 19,450x and the unique barcode coverage passing filter was 2,450x. Panels E and F show sequencing coverage depths obtained for ultra-deep error corrected sequencing at day 30 (Panel E) and bone marrow and day 100 post-allogeneic hematopoietic cell transplant (Panel F). At day 30 the total mean tumor coverage was 60,930x and the unique barcode coverage passing filter was 2,559x. At day 100

the total mean tumor coverage was 36,705x and the unique barcode coverage passing filter was 3,475x. Panel G shows sequencing coverage depths obtained for ultra-deep error-corrected sequencing for the 58 patients with pre-allogeneic hematopoietic cell transplant samples. The total mean tumor coverage was 13,926x and the unique barcode coverage passing filter was 1,569x.

**Supplementary Figure 3. Mutation Clearance of Selected Genes at Day 30 Post-Allogeneic Hematopoietic Cell Transplant.**

VAF mutation clearances for recurrently mutated genes. 11 genes are shown, which were identified as mutated 4 or more times in this study including *ASXL1*, *DNMT3A*, *IDH2*, *NRAS*, *PTPN11*, *RUNX1*, *SF3B1*, *SRSF2*, *TET2*, *TP53*, and *U2AF1* (A-K). Shown are initial marrow mutation VAFs and day 30 VAFs of each gene and labeled by UPN and progression and overall day 30 maximum mutation VAF status. Plots on the right highlight mutations with VAFs < 5% at day 30 post-transplant, labeled by the same symbol and color of the patient.

**Supplementary Figure 5. Association of Mutation Clearance at Day 30 post-alloHCT with Outcomes.** Variant allele frequencies (VAFs) day 30 post-transplant were determined using error-corrected sequencing interrogating single nucleotide variant (SNV) mutations identified by enhanced exome sequencing of samples prior to transplant. Patients are grouped by the presence of at least one VAF  $\geq 0.5\%$  (red lines) or all VAFs < 0.5% (blue lines). Risk of progression is shown in Panel A, progression free survival is shown in Panel B. Panels C and D show overall survival based on the presence of at least one VAF  $\geq 0.5\%$  (Panel C) and according to whether the patient received reduced-intensity conditioning (RIC, solid lines) or myeloablative conditioning (MAC, dashed line) in Panel D.

**Supplementary Figure 5. Association of Mutation Clearance at Day 100 Post-alloHCT with Outcomes.** Variant allele frequencies (VAFs) day 100 post-transplant were determined using error-corrected sequencing interrogating single nucleotide variant (SNV) mutations identified by enhanced exome sequencing of samples prior to transplant. Patients are grouped by the presence of at least one VAF  $\geq 0.5\%$  (red lines) or all VAFs  $< 0.5\%$  (blue lines). Panels B, D, and F show outcomes according to whether the patient received reduced-intensity conditioning (RIC, solid lines) or myeloablative conditioning (MAC, dashed line). Risk of progression (Panels A and B), progression-free survival (Panels C and D), and overall survival (Panels E and F) are shown.

**Supplementary Figure 6. Association of Mutation Clearance with Outcomes Using a Variant Allele Frequency Threshold of 0.1%.** Variant allele frequencies (VAFs) day 30 post-transplant were determined using error-corrected sequencing interrogating single nucleotide variant (SNV) mutations identified by enhanced exome sequencing of samples prior to transplant. Patients are grouped by the presence of at least one VAF  $\geq 0.1\%$  (red lines) or all VAFs  $< 0.1\%$  (blue lines). Panels B, D, and F show outcomes according to whether the patient received reduced-intensity conditioning (RIC, solid lines) or myeloablative conditioning (MAC, dashed line). Risk of progression (Panels A and B), progression-free survival (Panels C and D), and overall survival (Panels E and F) are shown.

**Supplementary Figure 7. Association of Mutation Clearance with Outcomes Using a Variant Allele Frequency Threshold of 1%.** Variant allele frequencies (VAFs) day 30 post-transplant were determined using error-corrected sequencing interrogating single nucleotide variant (SNV) mutations identified by enhanced exome sequencing of samples prior to transplant. Patients are grouped by the presence of at least one VAF  $\geq 1\%$  (red lines) or all VAFs  $< 1\%$  (blue lines). Panels B, D, and F show outcomes according to whether the patient received reduced-intensity conditioning (RIC, solid lines) or myeloablative conditioning (MAC,

dashed line). Risk of progression (Panels A and B), progression-free survival (Panels C and D), and overall survival (Panels E and F) are shown.

**Supplementary Figure 8. Association of Mutation Clearance with Outcomes Using a Variant Allele Frequency Threshold of 2.5%.** Variant allele frequencies (VAFs) day 30 post-transplant were determined using error-corrected sequencing interrogating single nucleotide variant (SNV) mutations identified by enhanced exome sequencing of samples prior to transplant. Patients are grouped by the presence of at least one VAF  $\geq 2.5\%$  (red lines) or all VAFs  $< 2.5\%$  (blue lines). Panels B, D, and F show outcomes according to whether the patient received reduced-intensity conditioning (RIC, solid lines) or myeloablative conditioning (MAC, dashed line). Risk of progression (Panels A and B), progression-free survival (Panels C and D), and overall survival (Panels E and F) are shown.

**Supplementary Figure 9. Association of Mutation Clearance with Outcomes Using any Detectable Variant Allele Frequency.** Variant allele frequencies (VAFs) day 30 post-transplant were determined using error-corrected sequencing interrogating single nucleotide variant (SNV) mutations identified by enhanced exome sequencing of samples prior to transplant. Patients are grouped by the presence of at least one detectable VAF  $> 0\%$  (red lines) or all VAFs  $= 0\%$  (blue lines). Panels B, D, and F show outcomes according to whether the patient received reduced-intensity conditioning (RIC, solid lines) or myeloablative conditioning (MAC, dashed line). Risk of progression (Panels A and B), progression-free survival (Panels C and D), and overall survival (Panels E and F) are shown.

**Supplementary Figure 10. Association of Mutation Clearance Determined by a 40 Gene-Panel.** Only the variant allele frequencies (VAFs) of 40 genes recurrently mutated in myeloid malignancies were used to assess mutation clearance at day 30 post-transplant. VAFs were

determined using error-corrected sequencing interrogating single nucleotide variants identified by enhanced exome sequencing of samples prior to transplant. Panel A shows the cumulative incidence of progression in patients grouped by the presence of at least one VAF  $\geq 0.5\%$  (red lines) or all VAFs  $< 0.5\%$  (blue lines). Panel B show progression-free survival. Panels C and D show overall survival grouped by VAF (Panel C) and according to whether the patient received reduced-intensity conditioning (RIC, solid lines) or myeloablative conditioning (MAC, dashed line) in Panel D.

## References

1. Jacoby MA, Duncavage EJ, Chang GS, et al. Subclones dominate at MDS progression following allogeneic hematopoietic cell transplant. *JCI Insight* 2018;3.
2. Uy GL, Duncavage EJ, Chang GS, et al. Dynamic changes in the clonal structure of MDS and AML in response to epigenetic therapy. *Leukemia* 2017;31:872-81.
3. Li H, Durbin R. Fast and accurate short read alignment with Burrows-Wheeler transform. *Bioinformatics (Oxford, England)* 2009;25:1754-60.
4. Li H, Handsaker B, Wysoker A, et al. The Sequence Alignment/Map format and SAMtools. *Bioinformatics* 2009;25:2078-9.
5. Larson DE, Harris CC, Chen K, et al. SomaticSniper: identification of somatic point mutations in whole genome sequencing data. *Bioinformatics (Oxford, England)* 2012;28:311-7.
6. Koboldt DC, Zhang Q, Larson DE, et al. VarScan 2: somatic mutation and copy number alteration discovery in cancer by exome sequencing. *Genome Research* 2012;22:568-76.
7. Saunders CT, Wong WS, Swamy S, Becq J, Murray LJ, Cheetham RK. Strelka: accurate somatic small-variant calling from sequenced tumor-normal sample pairs. *Bioinformatics* 2012;28:1811-7.
8. Cibulskis K, Lawrence MS, Carter SL, et al. Sensitive detection of somatic point mutations in impure and heterogeneous cancer samples. *Nature Biotechnology* 2013;31:213-9.
9. McKenna A, Hanna M, Banks E, et al. The Genome Analysis Toolkit: a MapReduce framework for analyzing next-generation DNA sequencing data. *Genome Research* 2010;20:1297-303.
10. Ye K, Schulz MH, Long Q, Apweiler R, Ning Z. Pindel: a pattern growth approach to detect break points of large deletions and medium sized insertions from paired-end short reads. *Bioinformatics (Oxford, England)* 2009;25:2865-71.
11. Lek M, Karczewski KJ, Minikel EV, et al. Analysis of protein-coding genetic variation in 60,706 humans. *Nature* 2016;536:285-91.

Figure S1. Number and Distribution of Tracked Mutations at the Initial and Pre-transplant Time Points

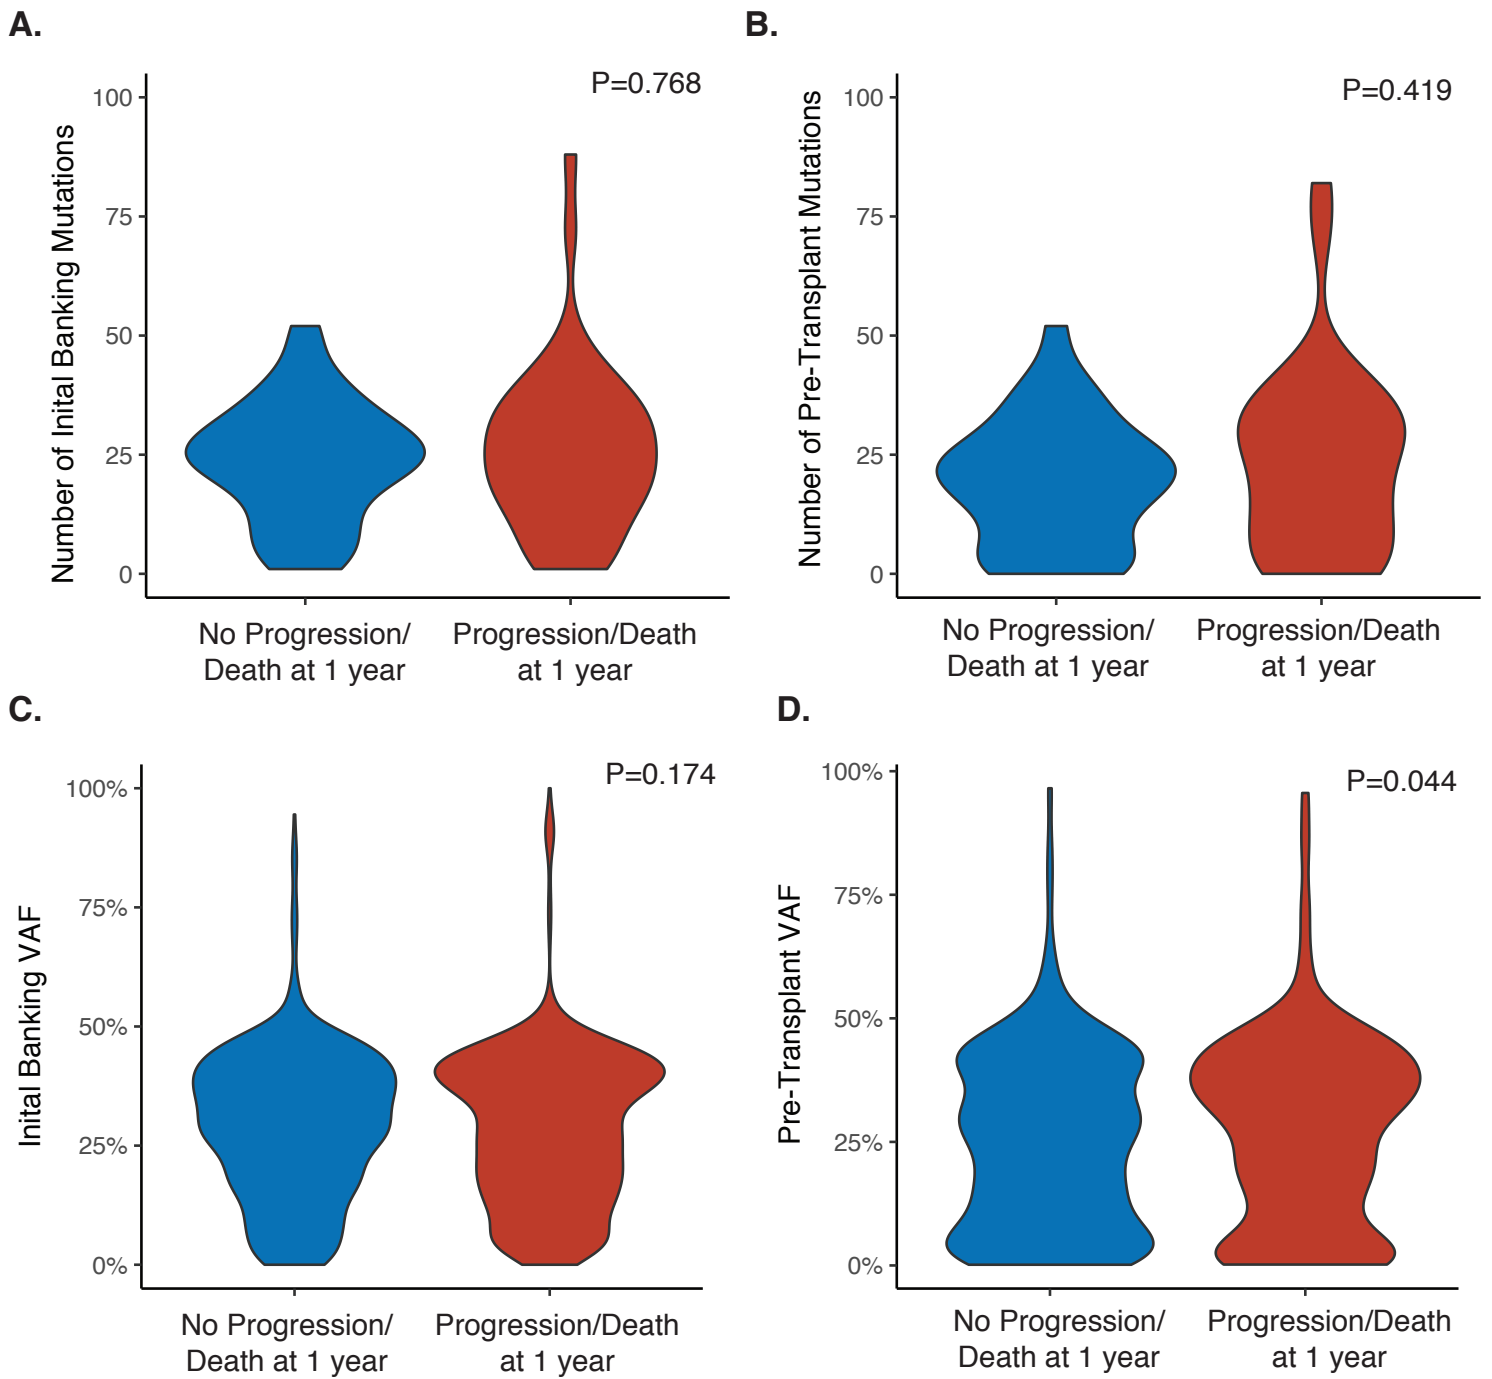

Figure S2. Sequencing Metrics

A.

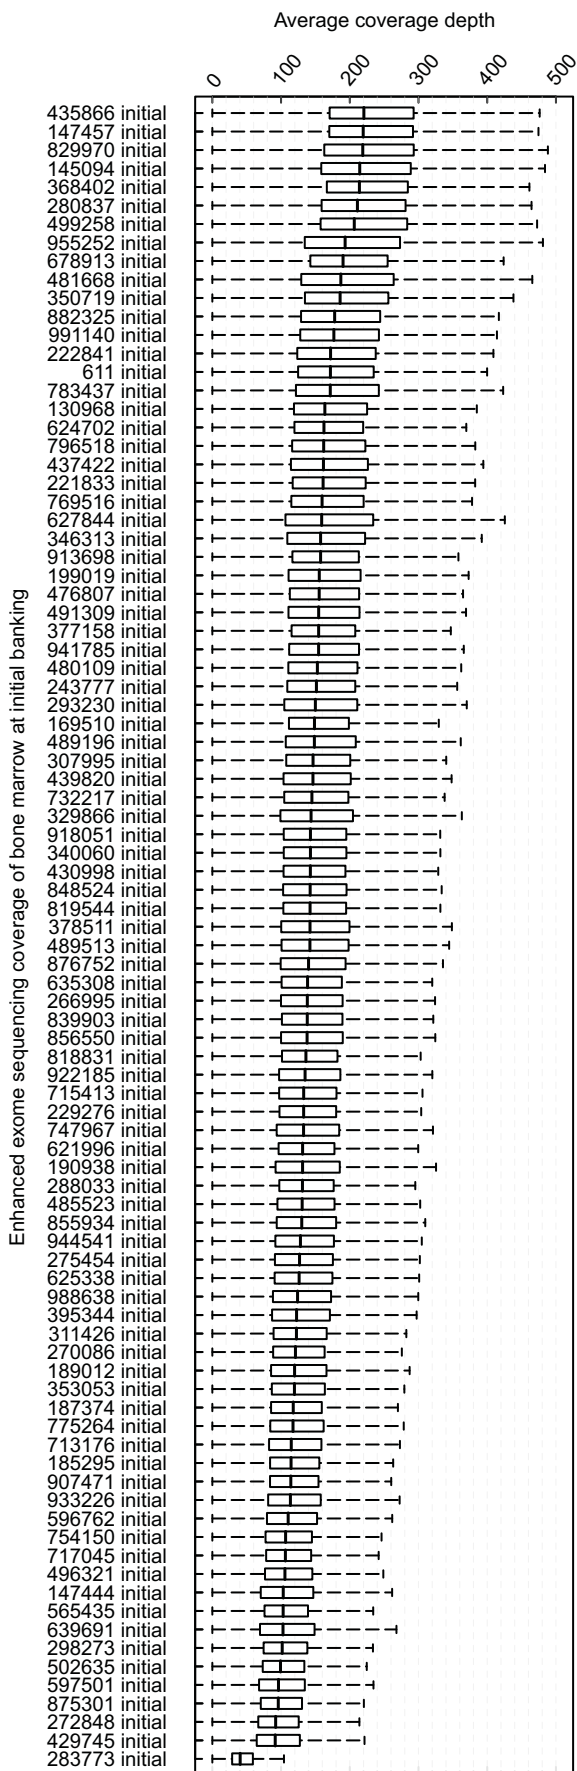

B.

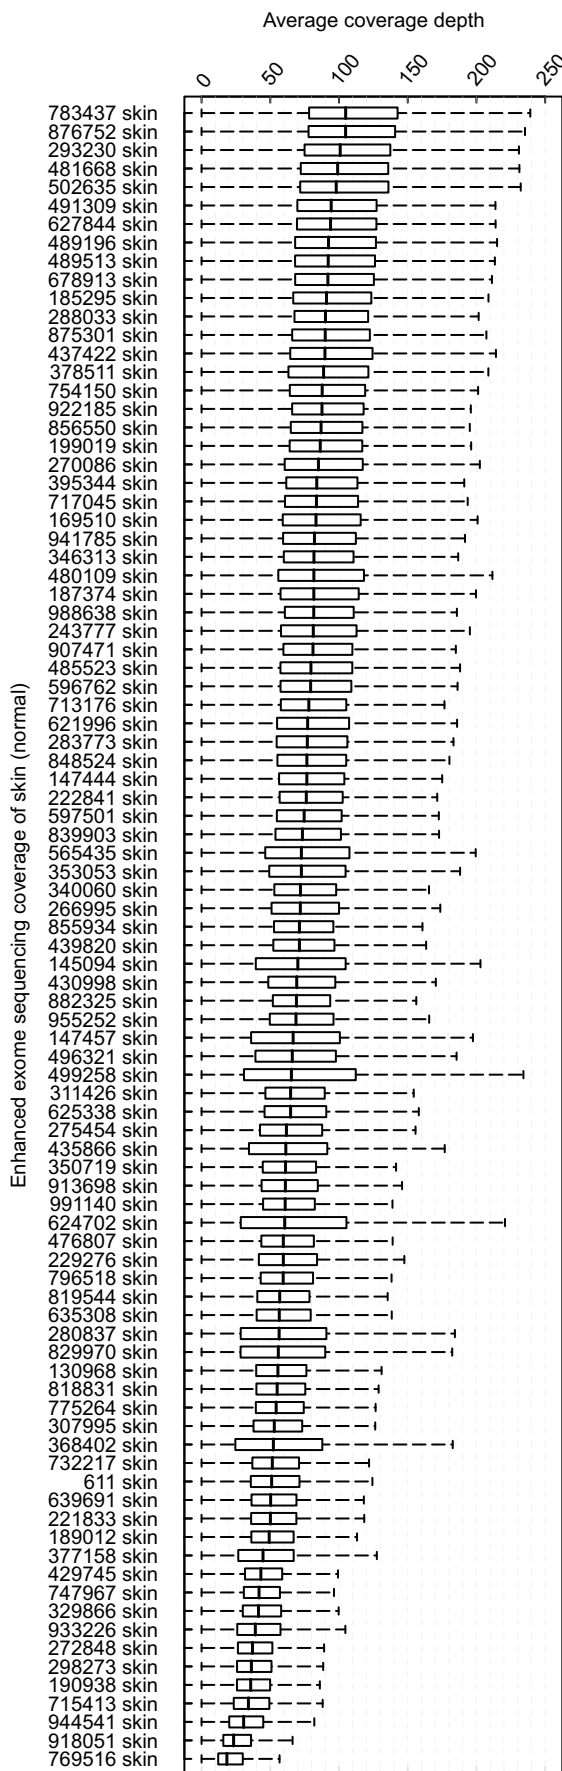



Figure S2. Sequencing Metrics

C.

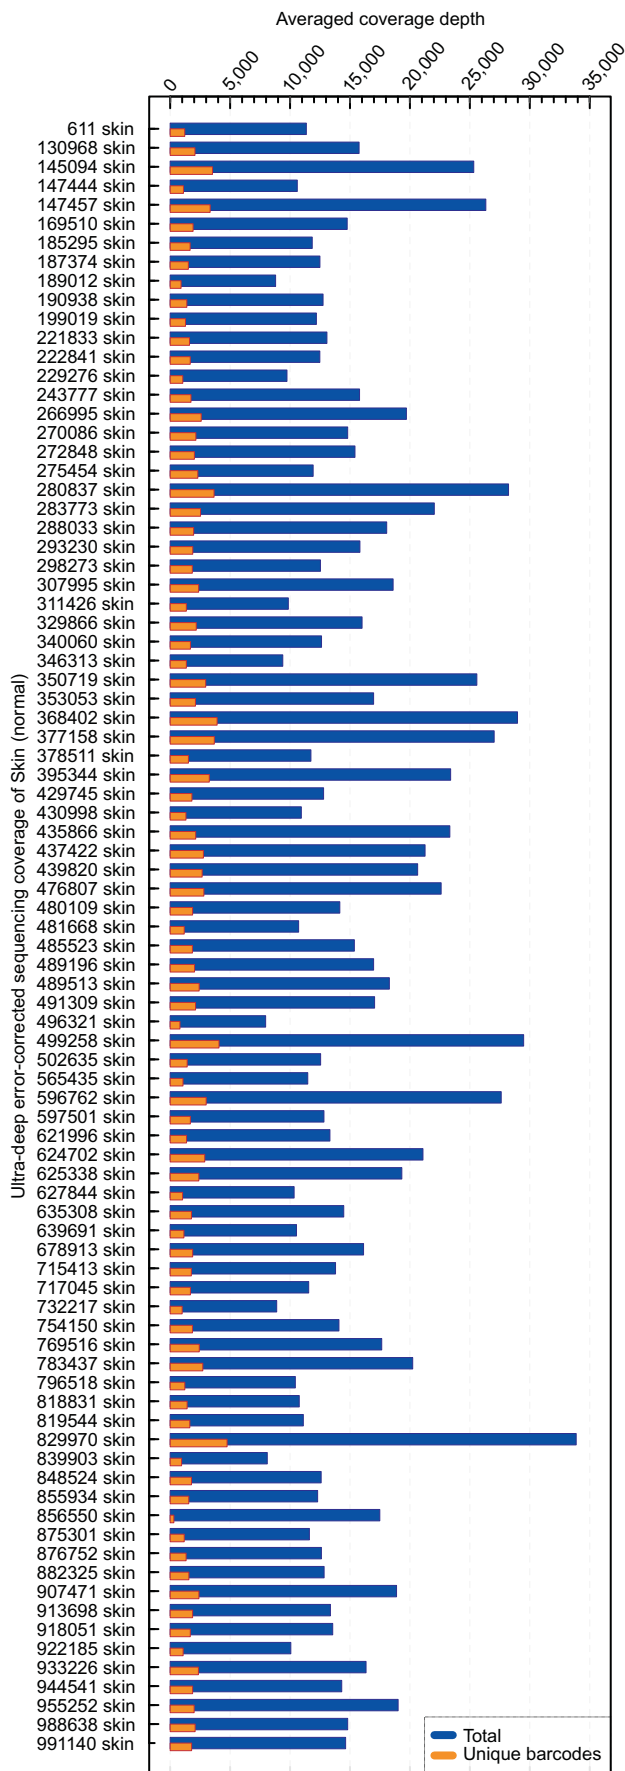

D.

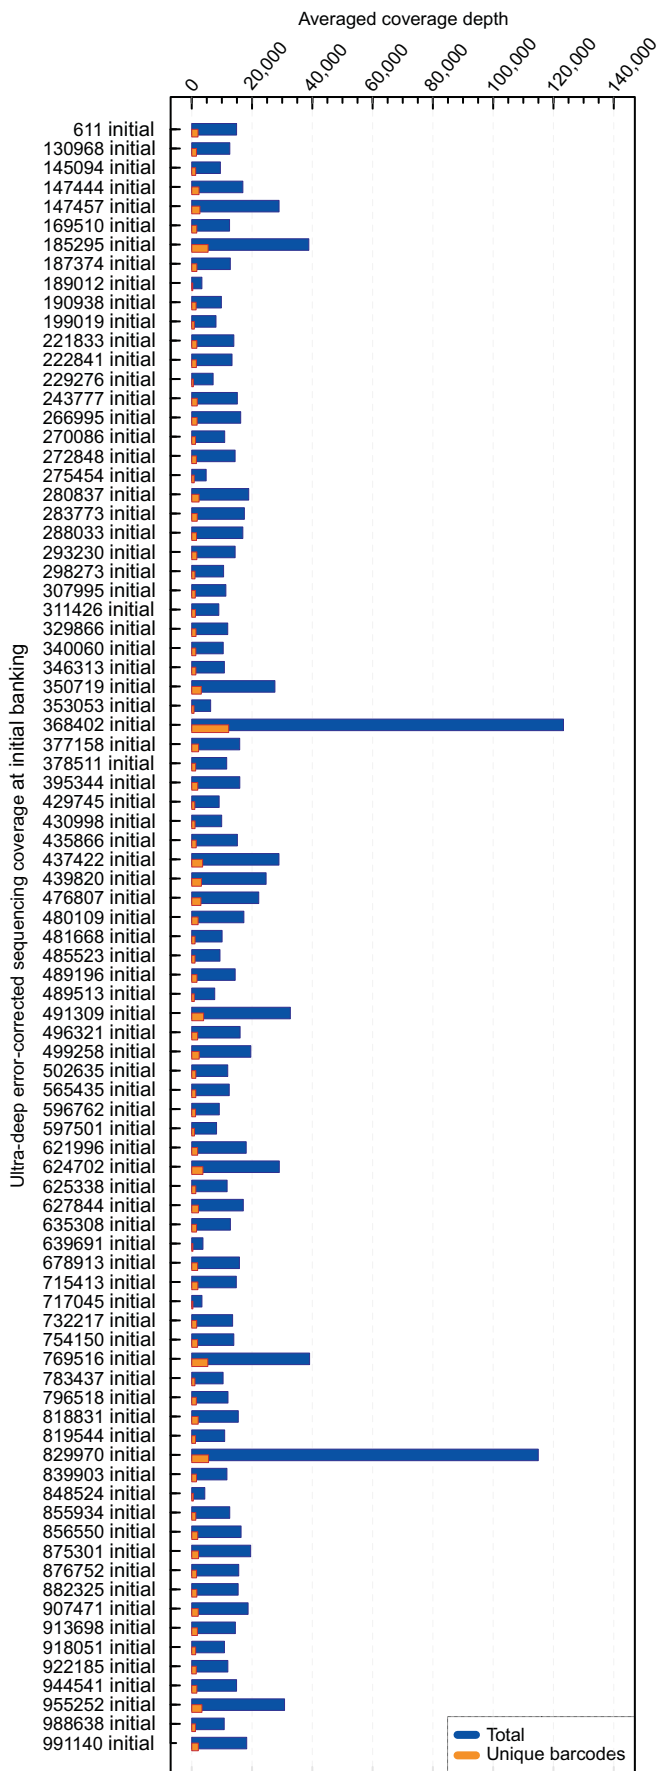

Figure S2. Sequencing Metrics

E.

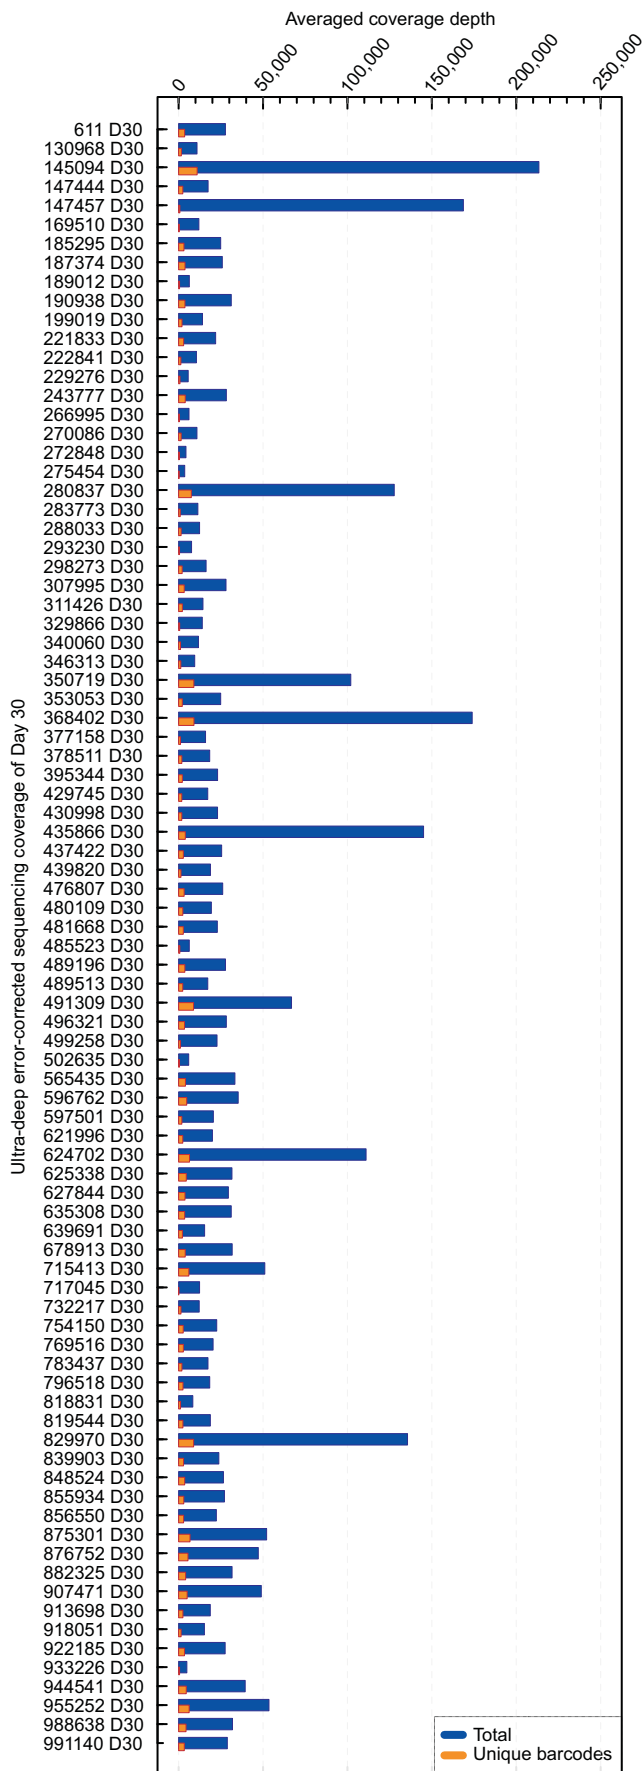

F.

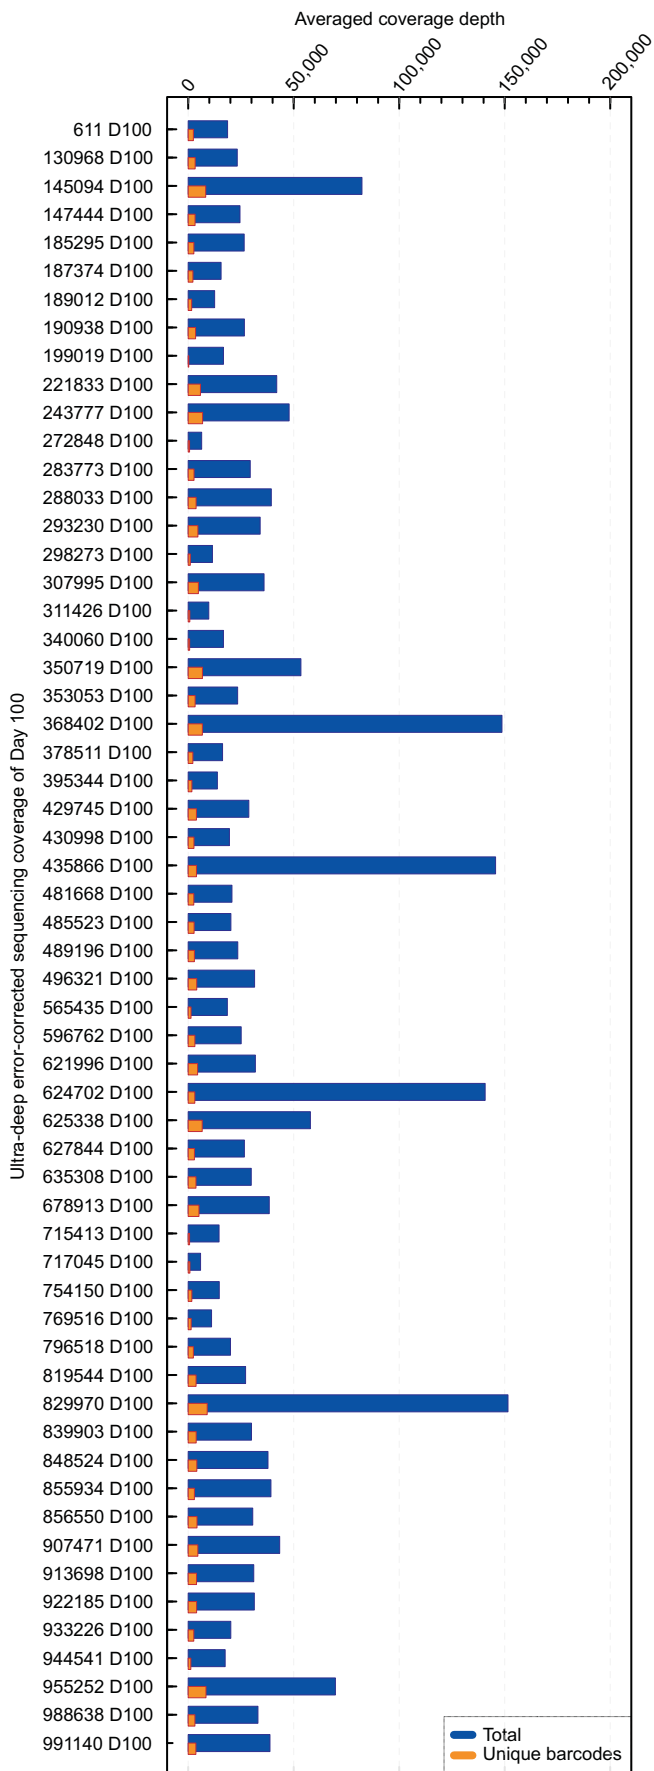

Figure S2. Sequencing Metrics

G.

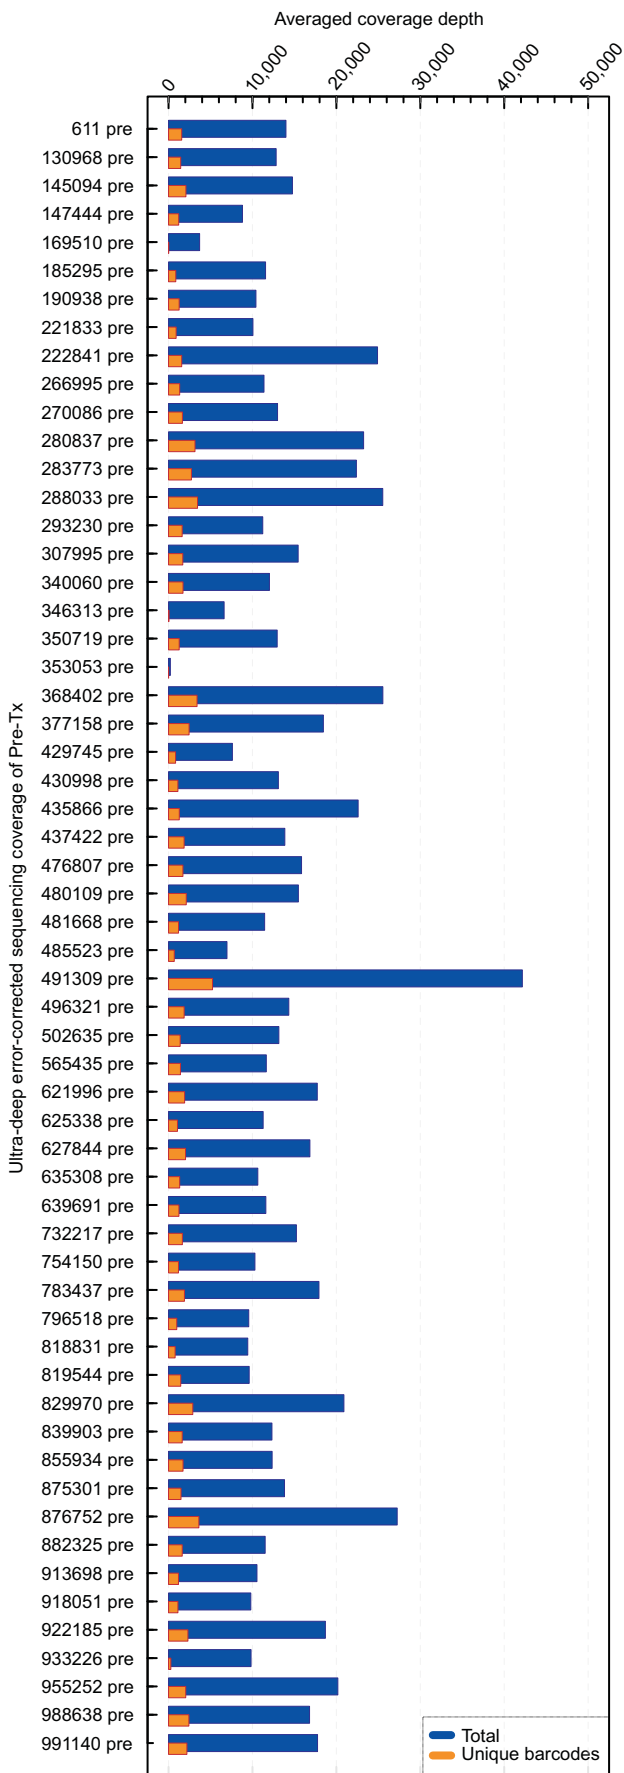

Figure S3. Mutation Clearance of Selected Genes at Day 30 Post-Allogeneic Hematopoietic Cell Transplant

A.

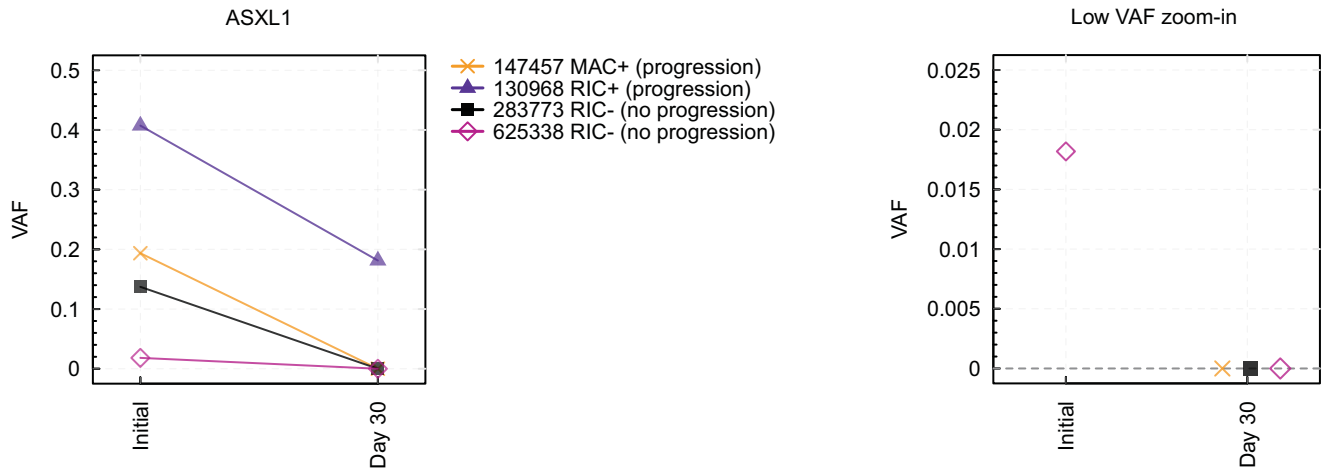

B.

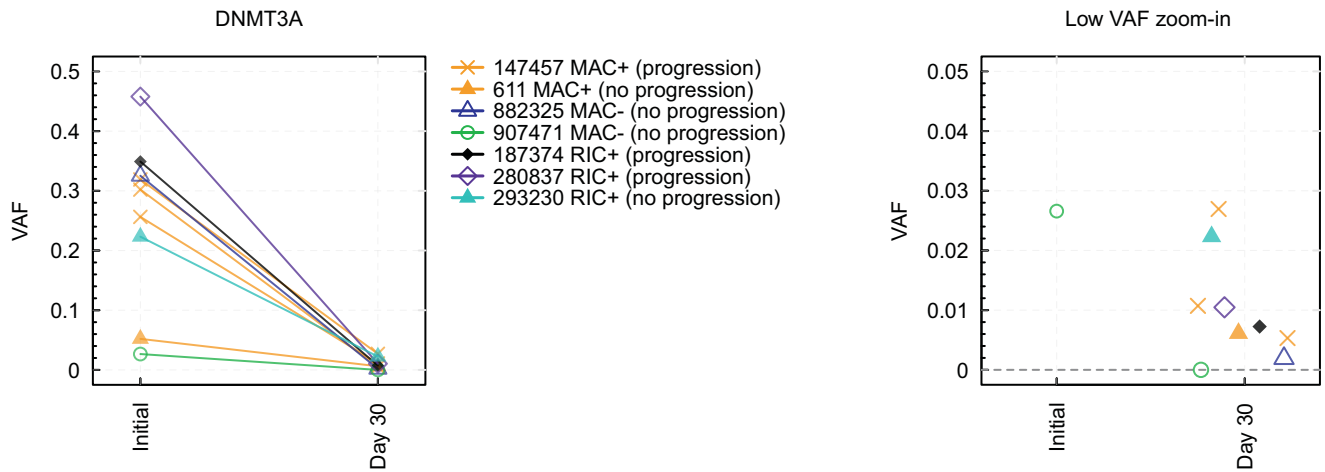

C.

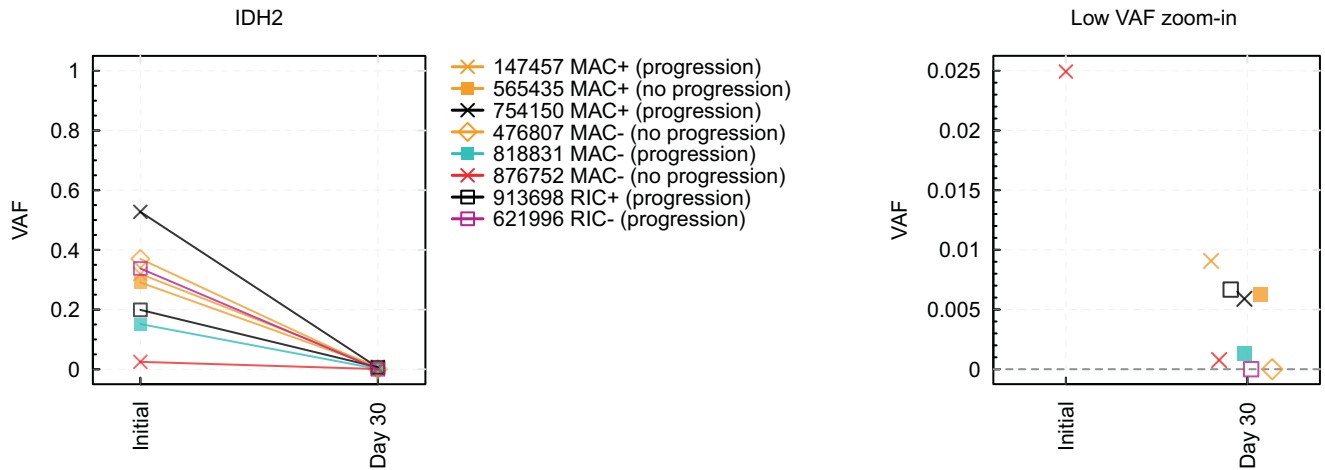

Figure S3. Mutation Clearance of Selected Genes at Day 30 Post-Allogeneic Hematopoietic Cell Transplant

D.

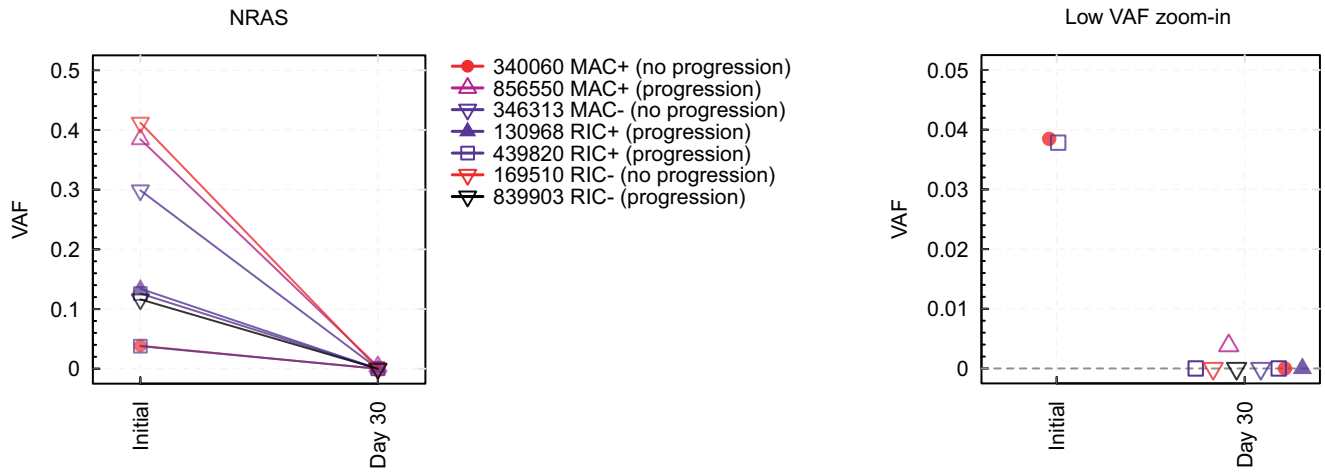

E.

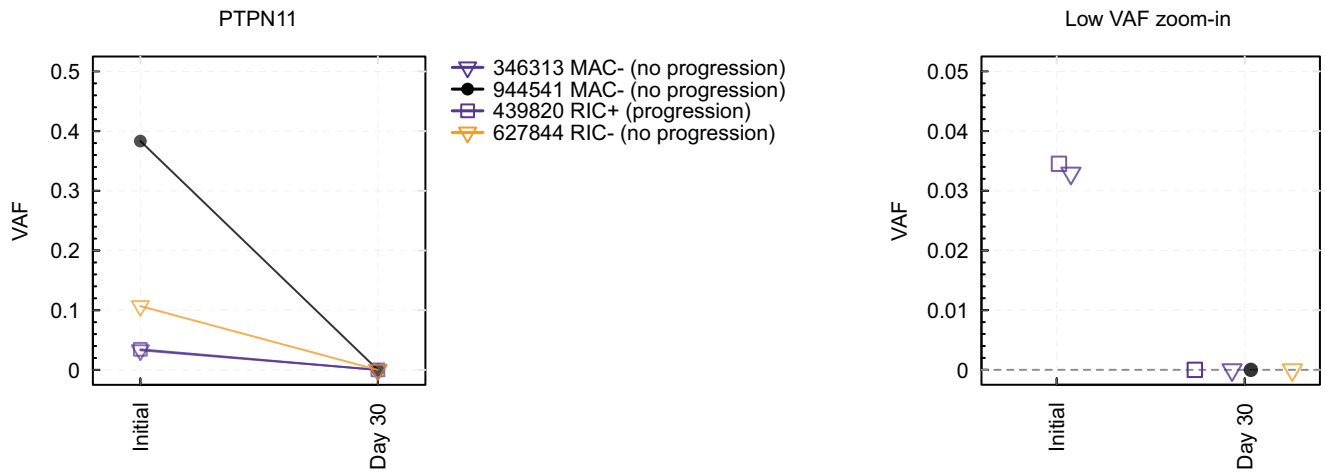

F.

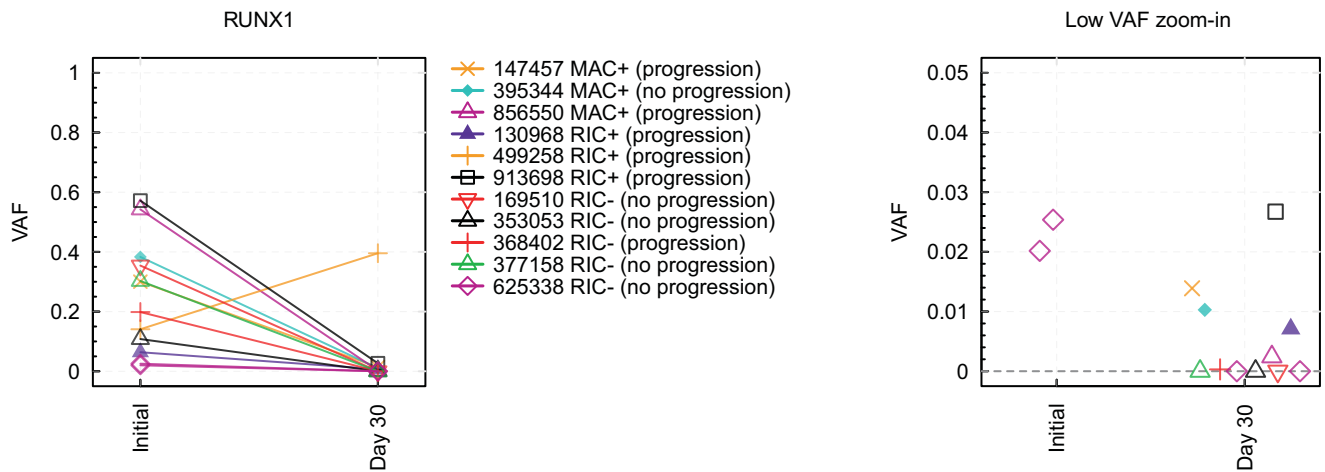

Figure S3. Mutation Clearance of Selected Genes at Day 30 Post-Allogeneic Hematopoietic Cell Transplant

G.

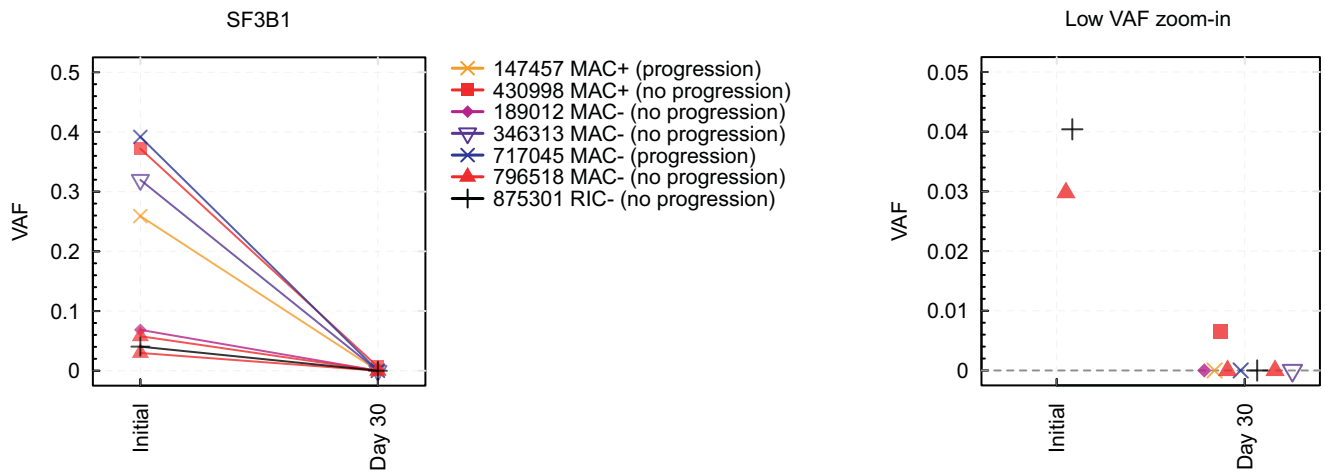

H.

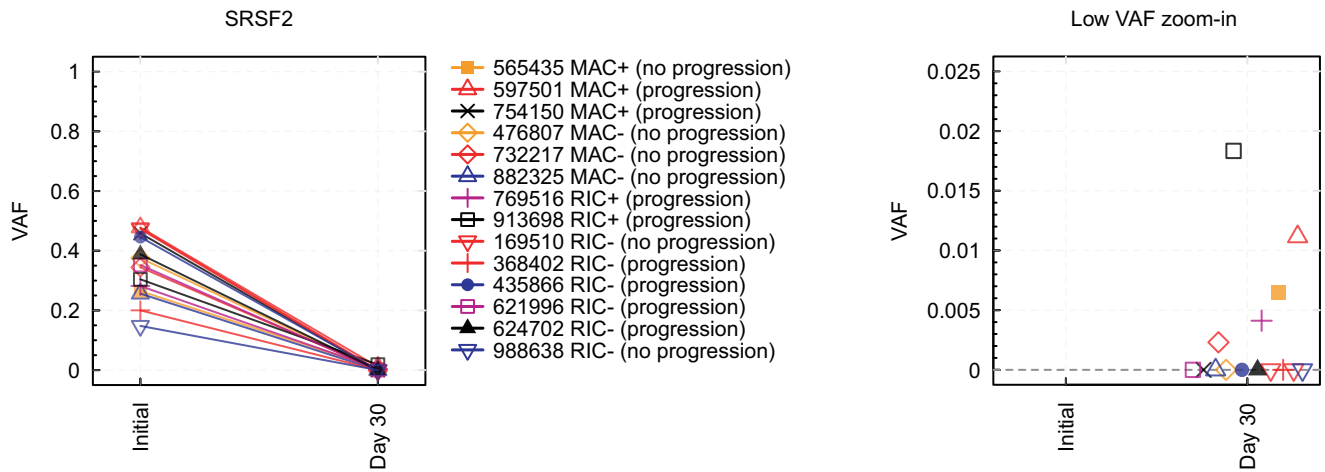

I.

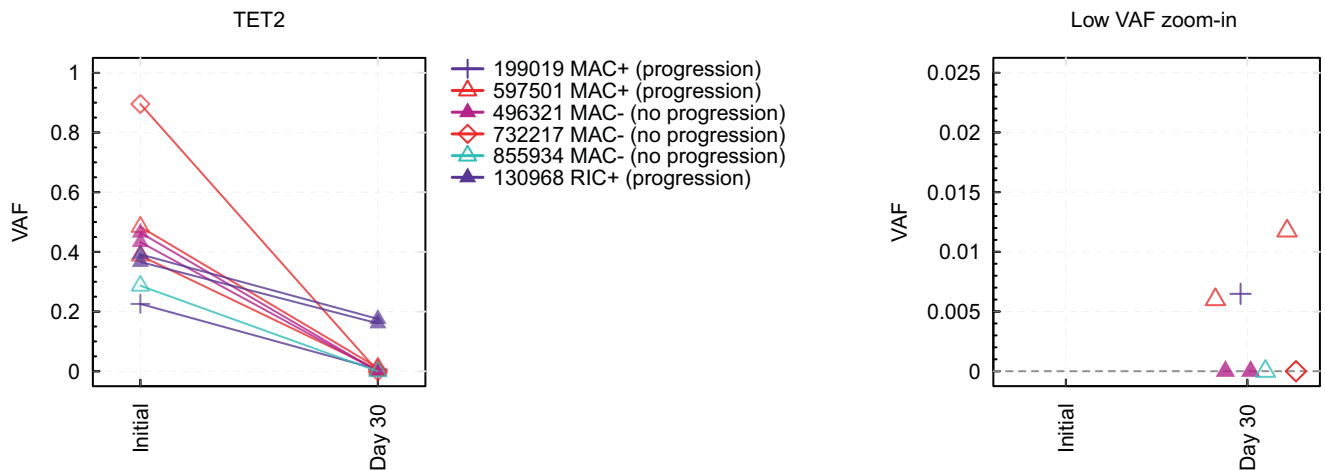

Figure S3. Mutation Clearance of Selected Genes at Day 30 Post-Allogeneic Hematopoietic Cell Transplant

J.

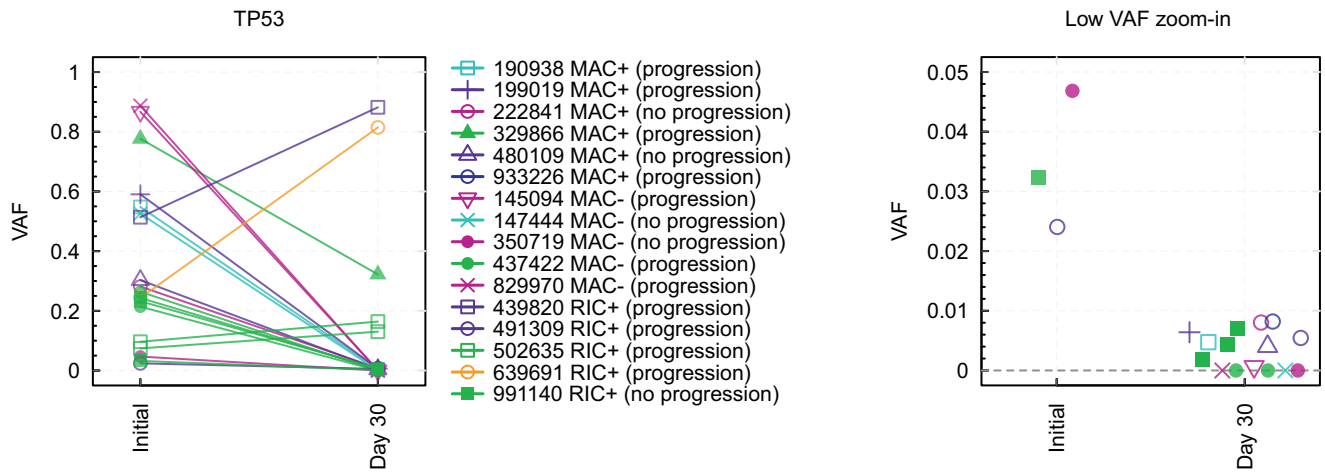

K.

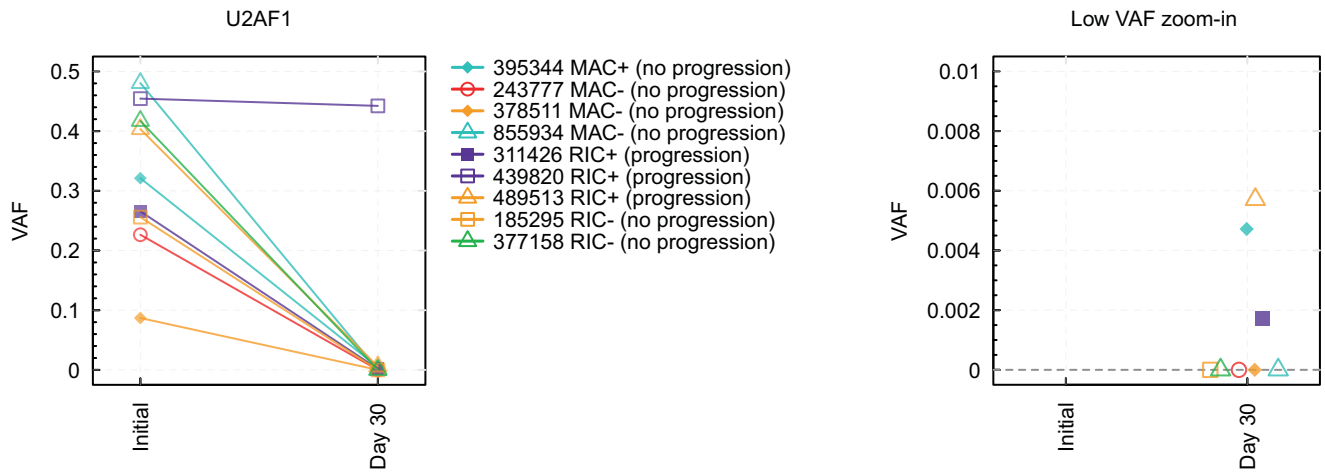

Figure S4. Association of Mutation Clearance at Day 30 post-alloHCT with Outcomes

**A.**

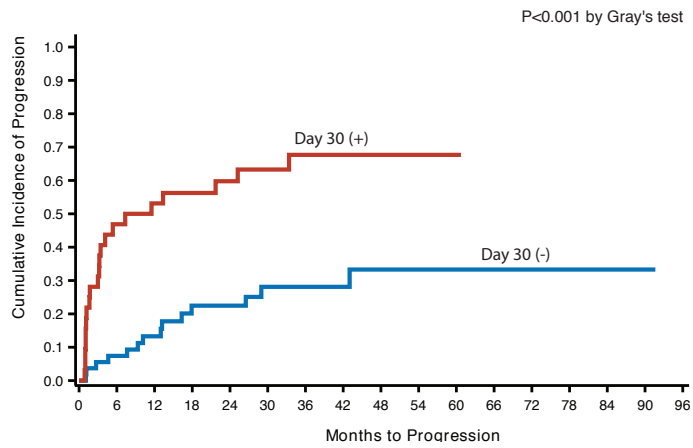

**B.**

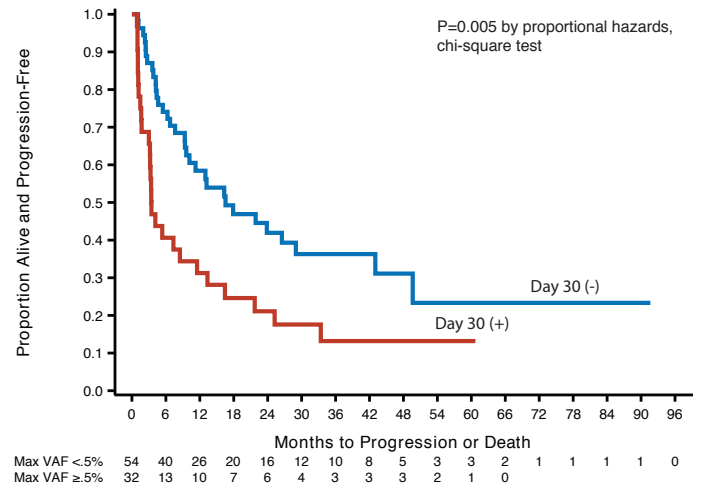

**C.**

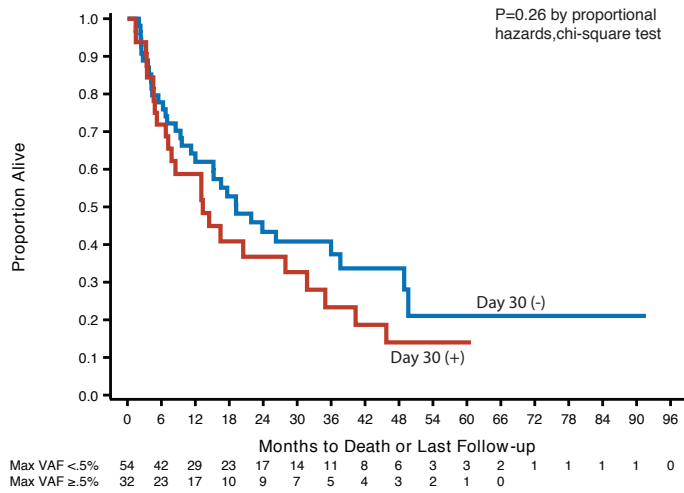

**D.**

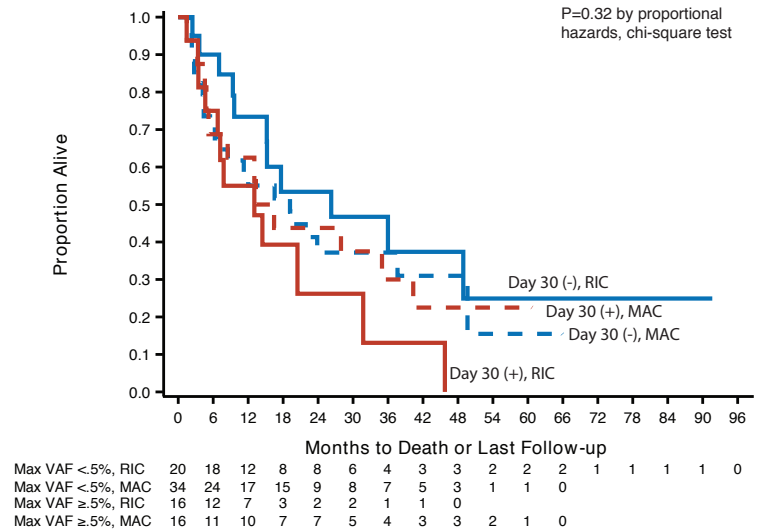



Figure S5. Association of Mutation Clearance at Day 100 post-alloHCT with Outcomes

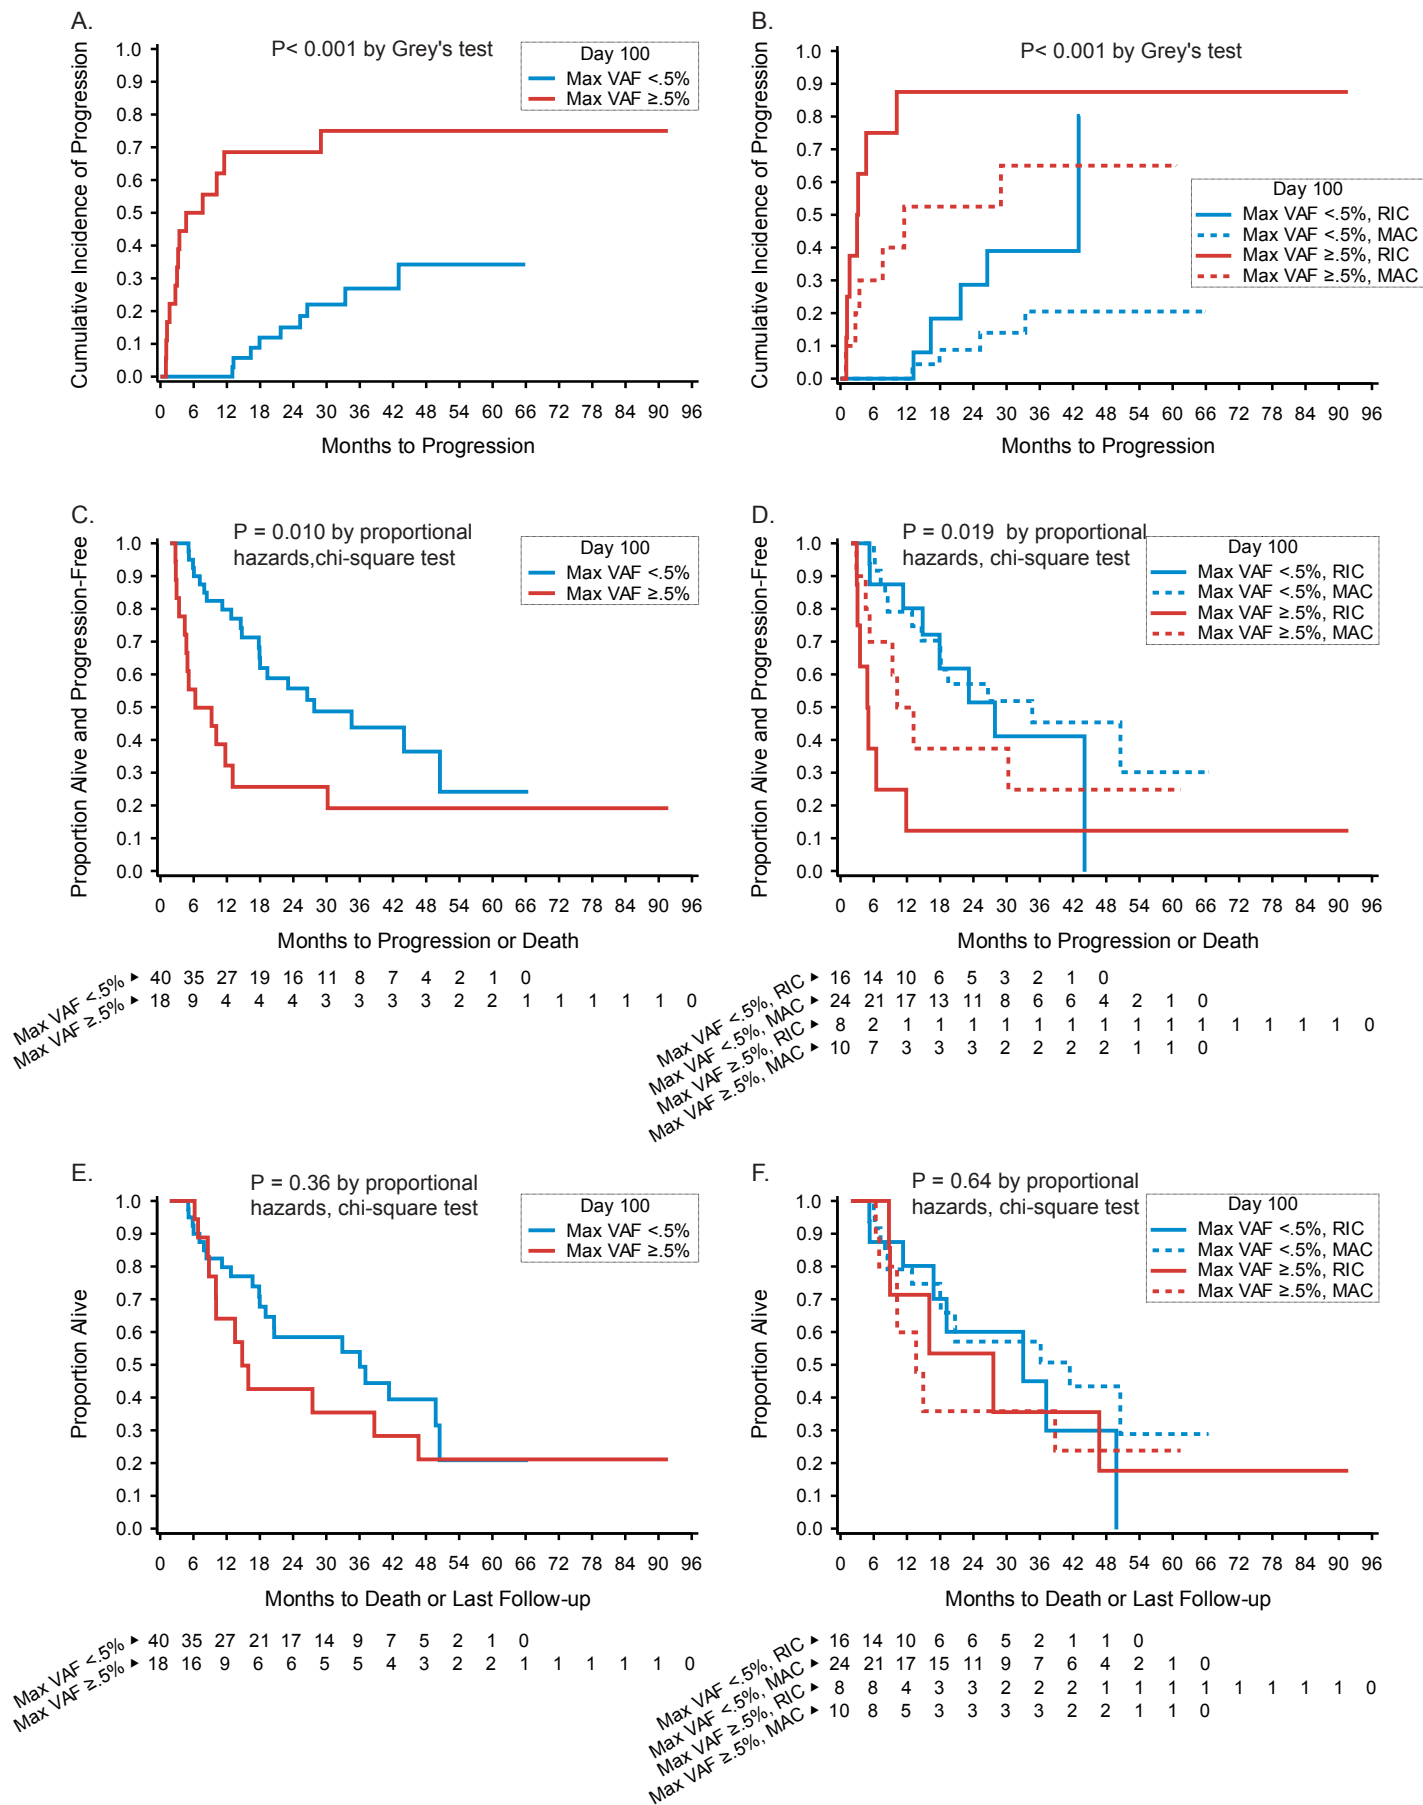

Figure S6. Association of Mutation Clearance with Outcomes Using a Variant Allele Frequency Threshold of 0.1%

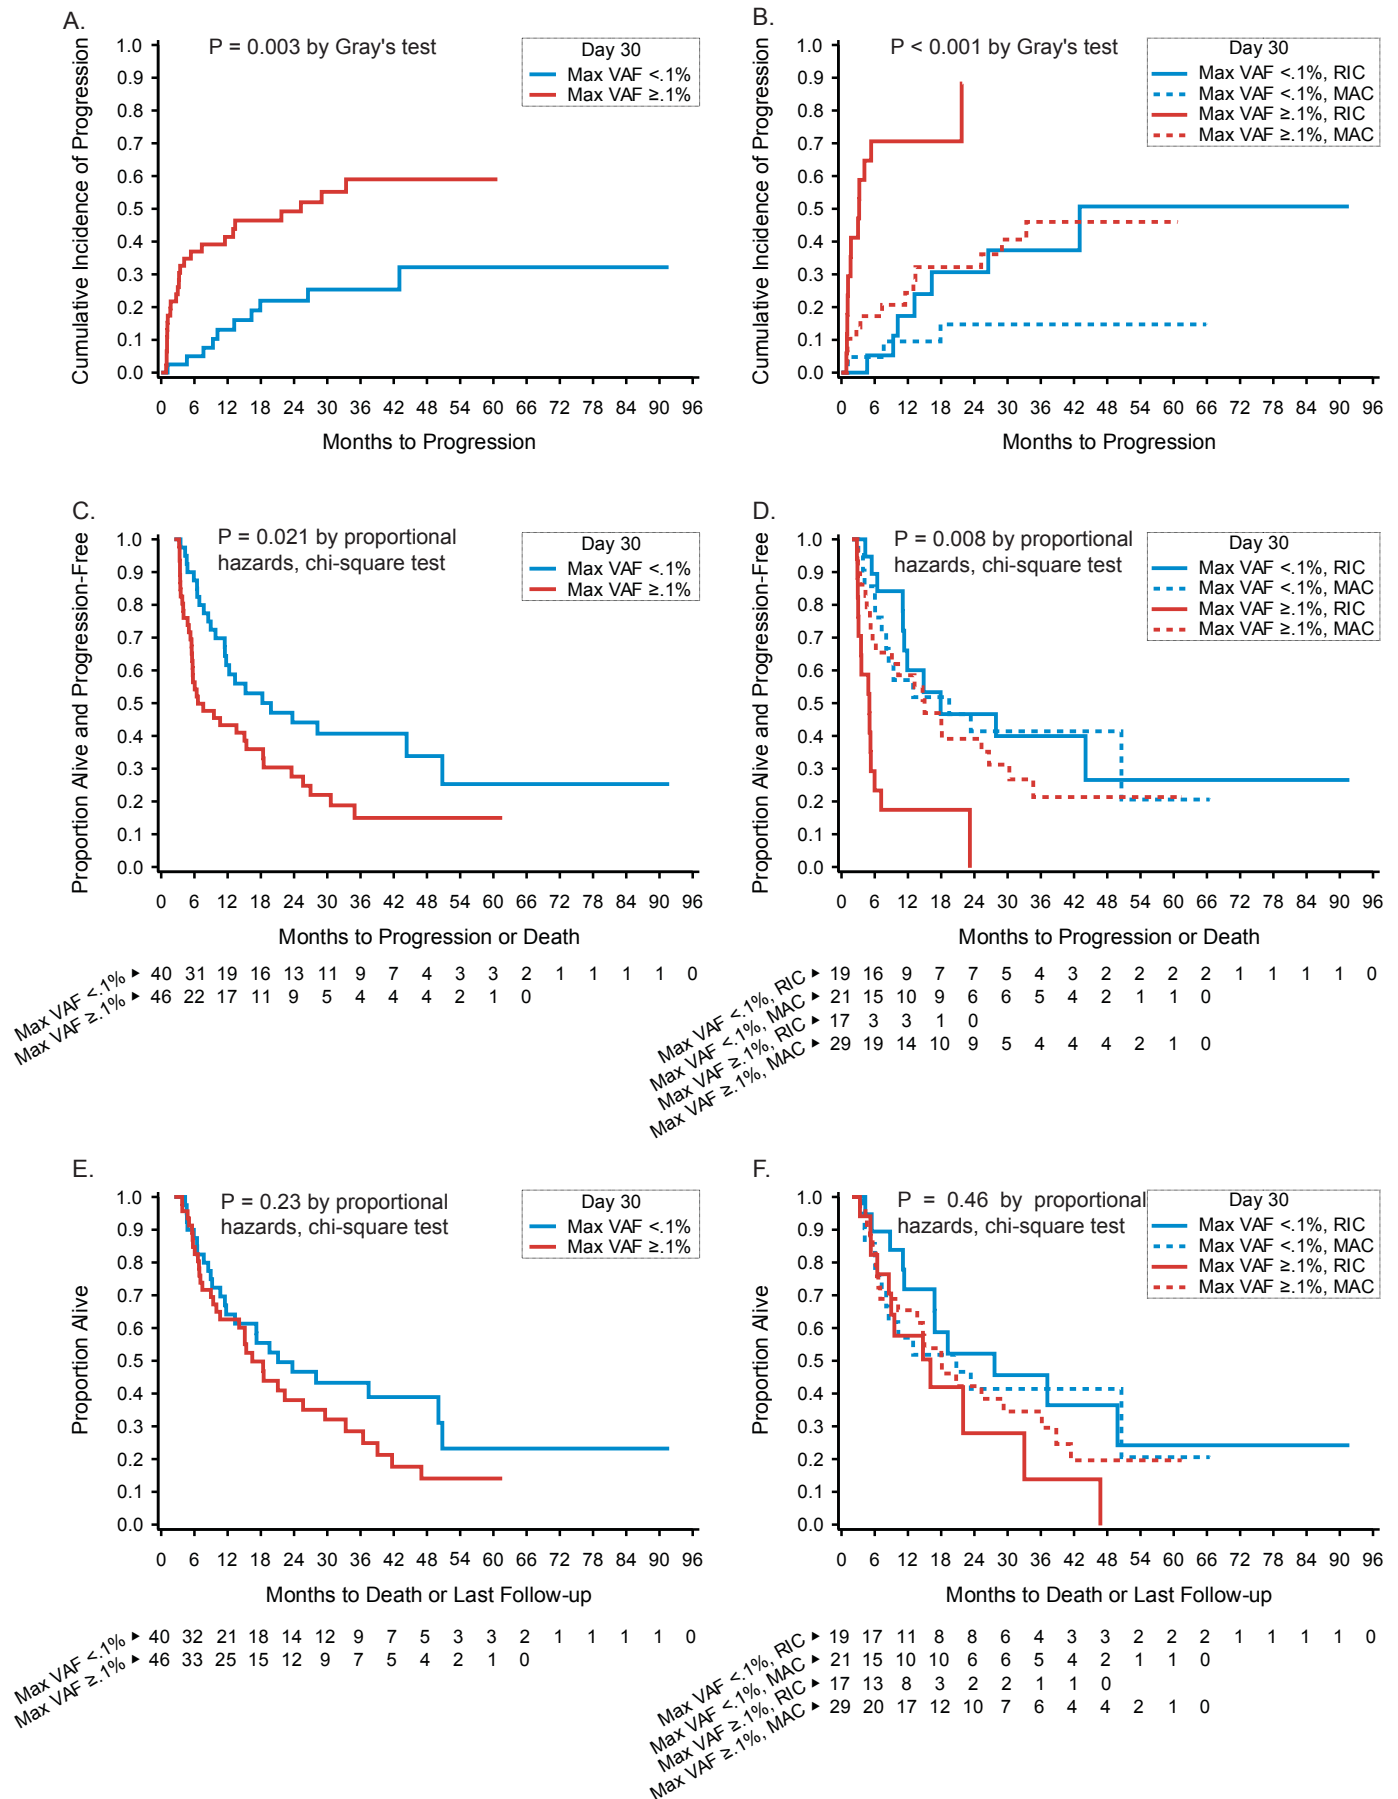

Figure S7. Association of Mutation Clearance with Outcomes Using a Variant Allele Frequency Threshold of 1%

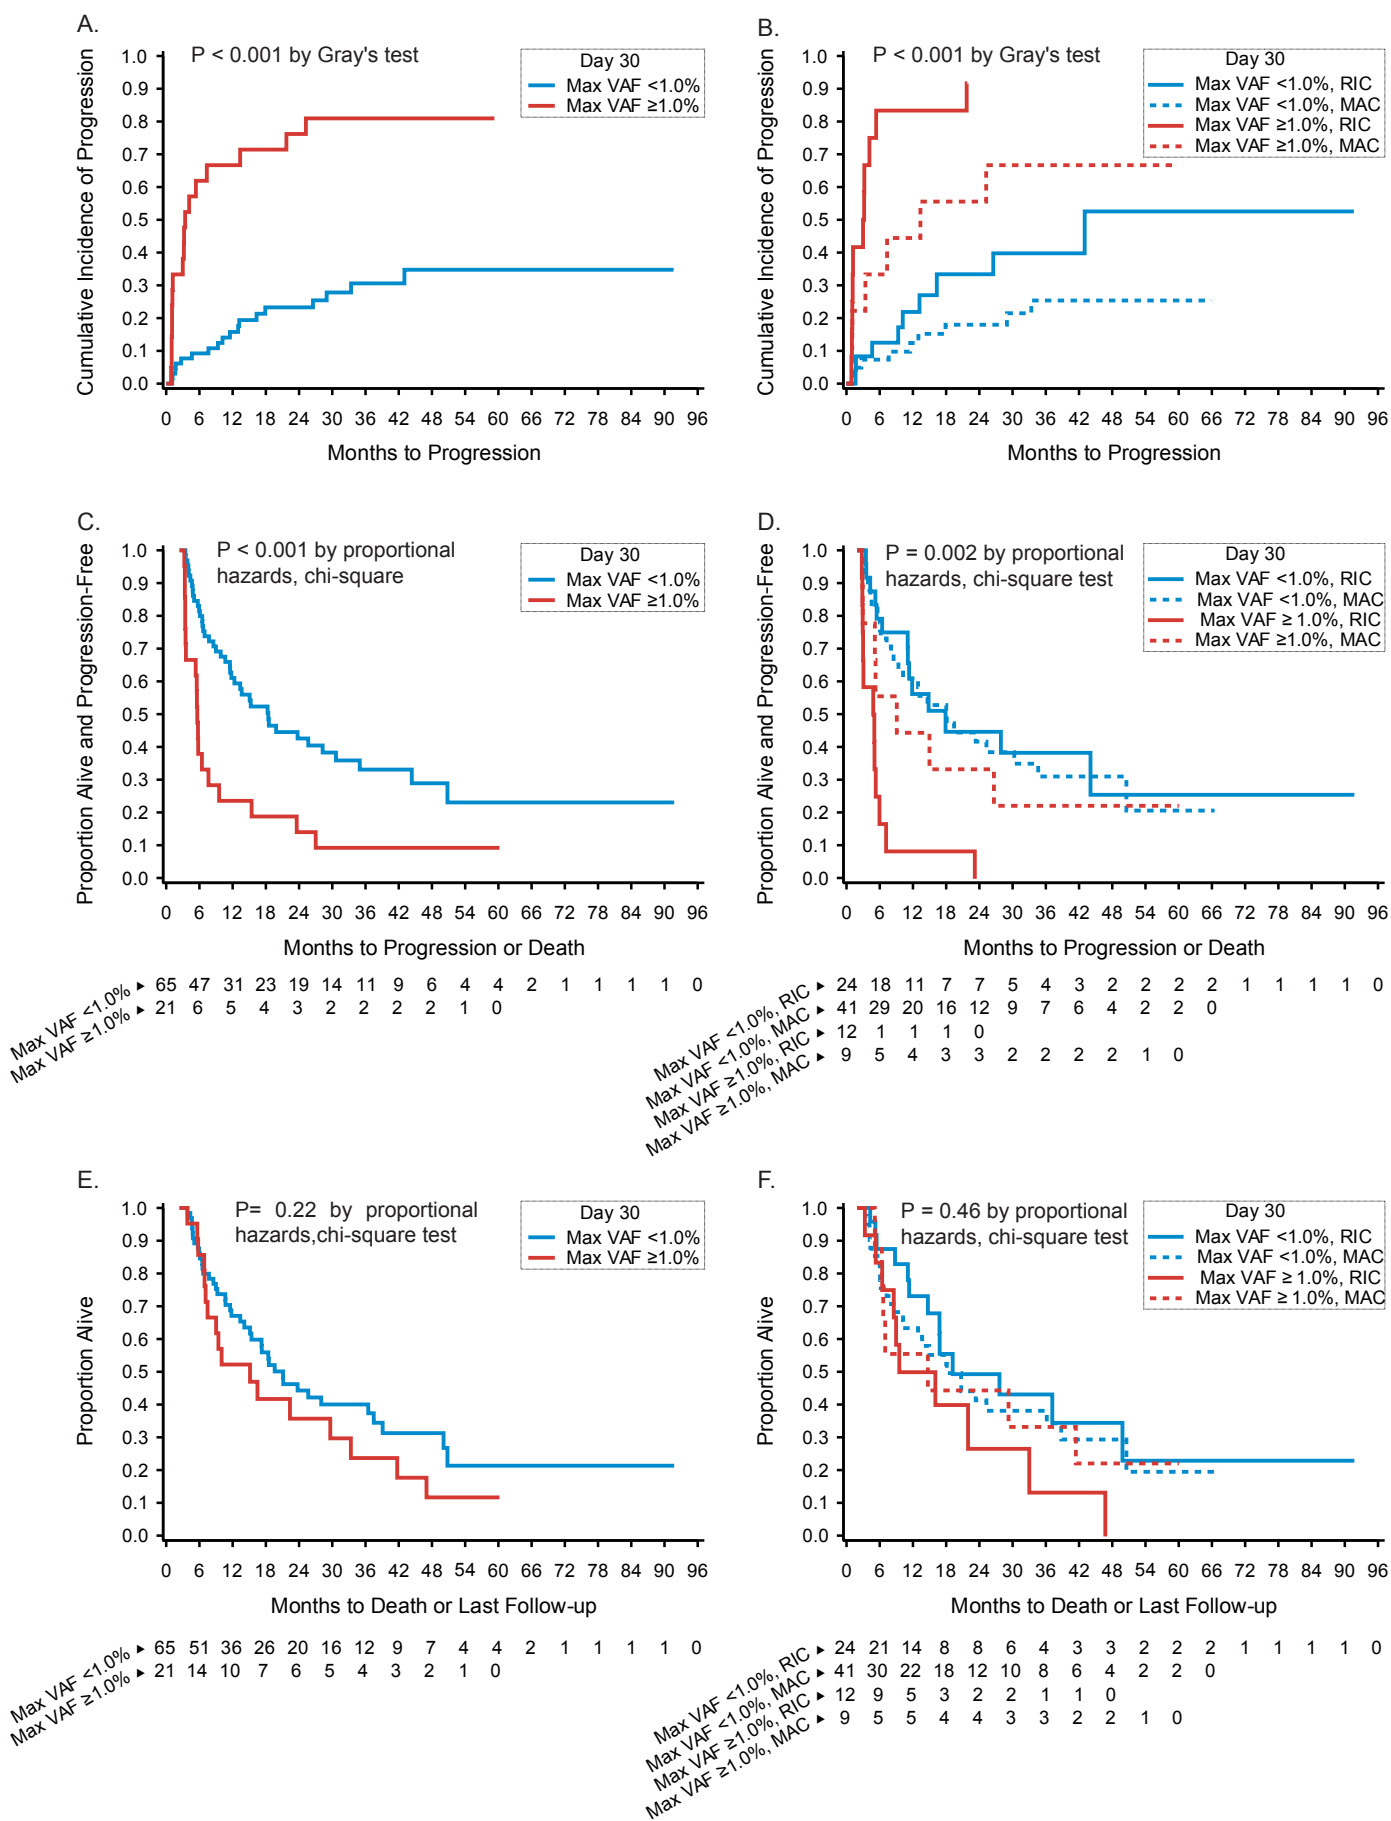

Figure S8. Association of Mutation Clearance with Outcomes Using a Variant Allele Frequency Threshold of 2.5%<sup>5%</sup>

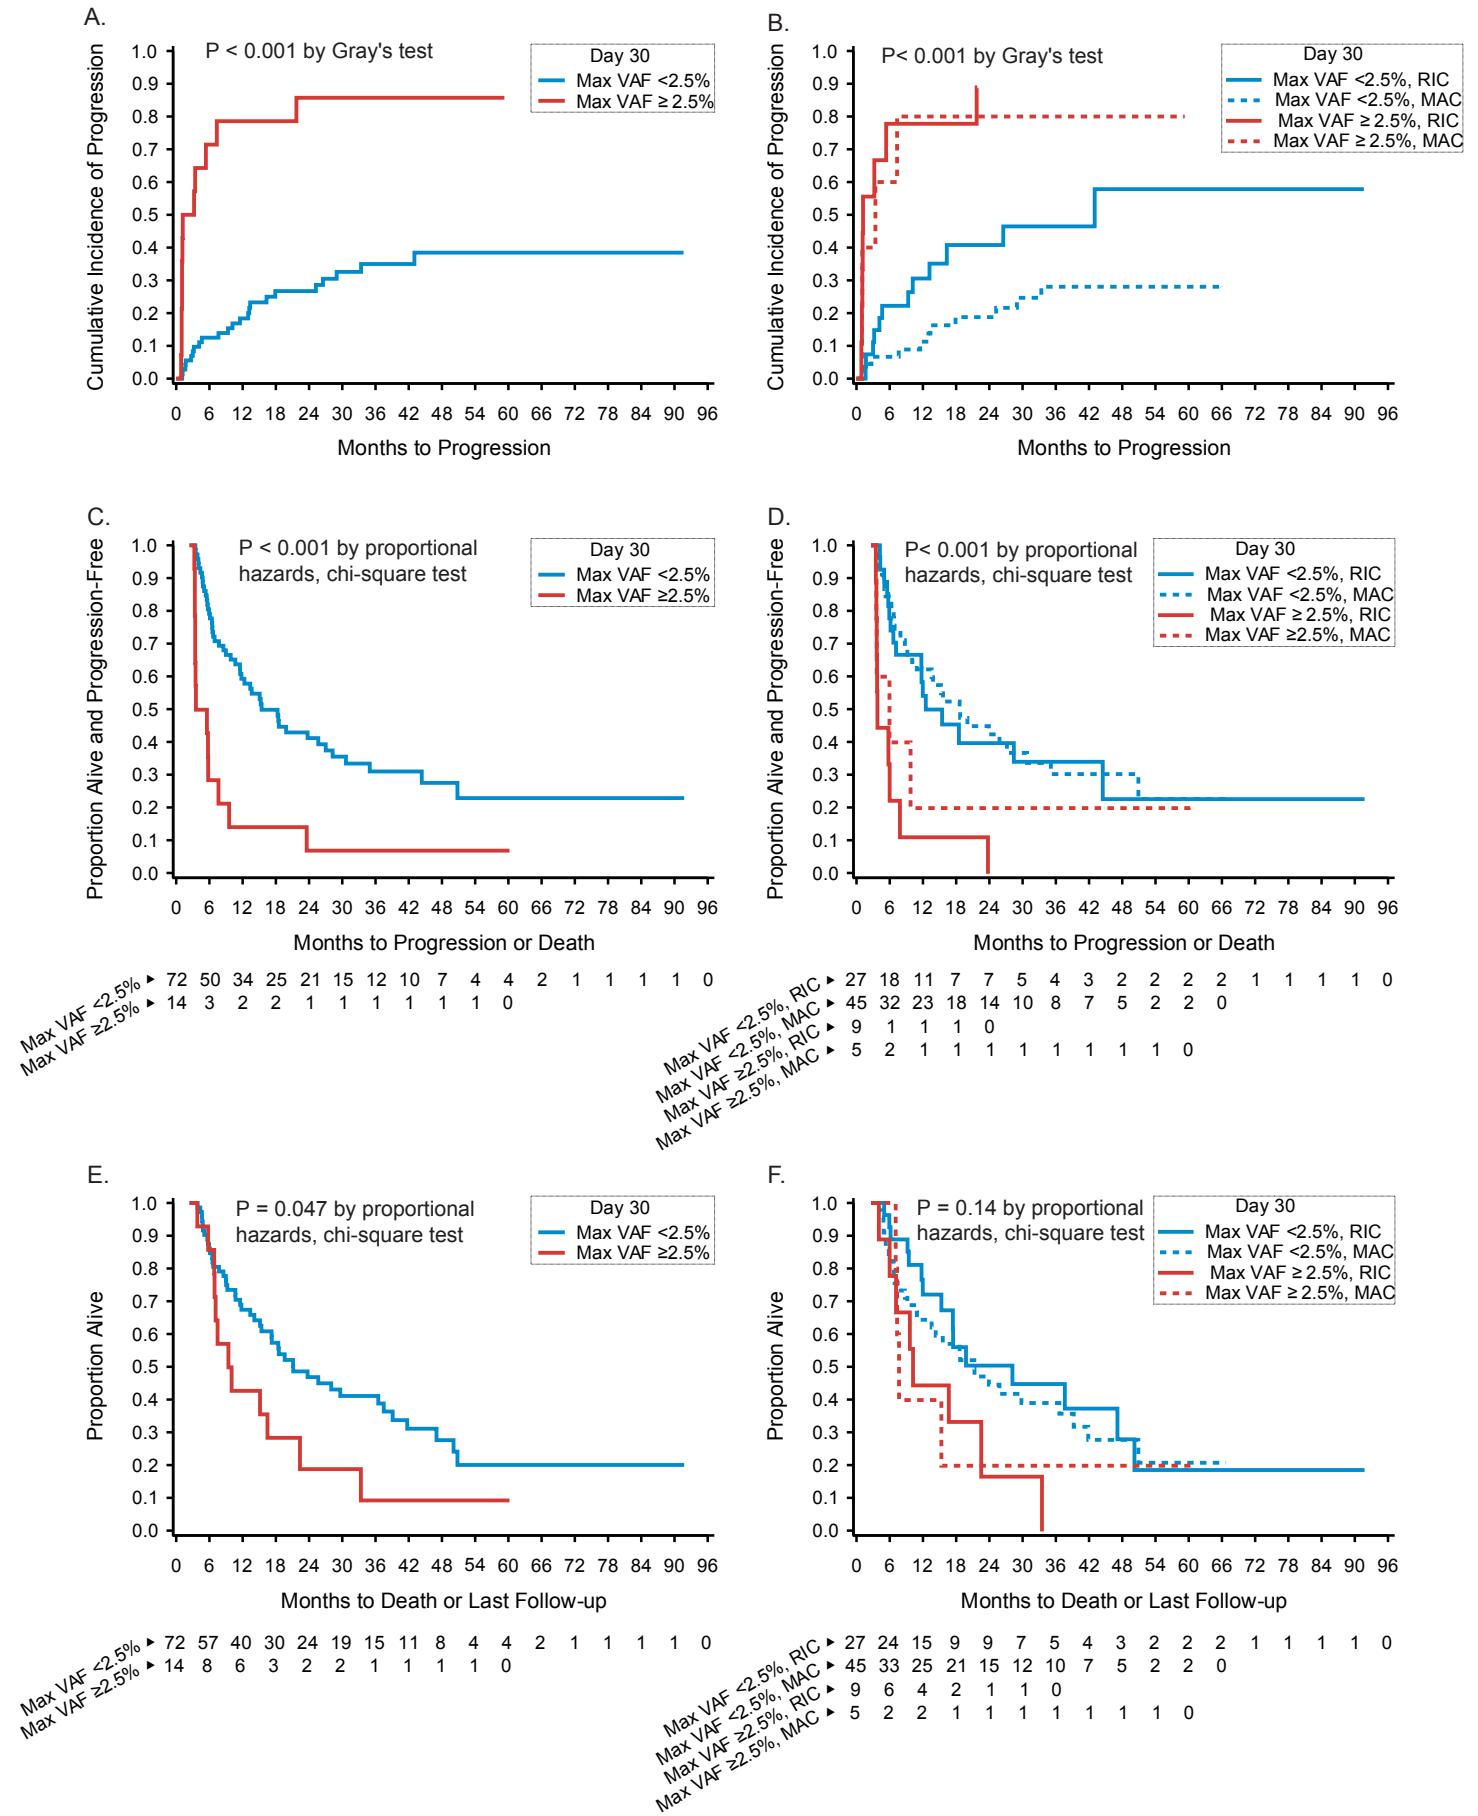

Figure S9. Association of Mutation Clearance with Outcomes Using Any Detectable Variant Allele Frequency

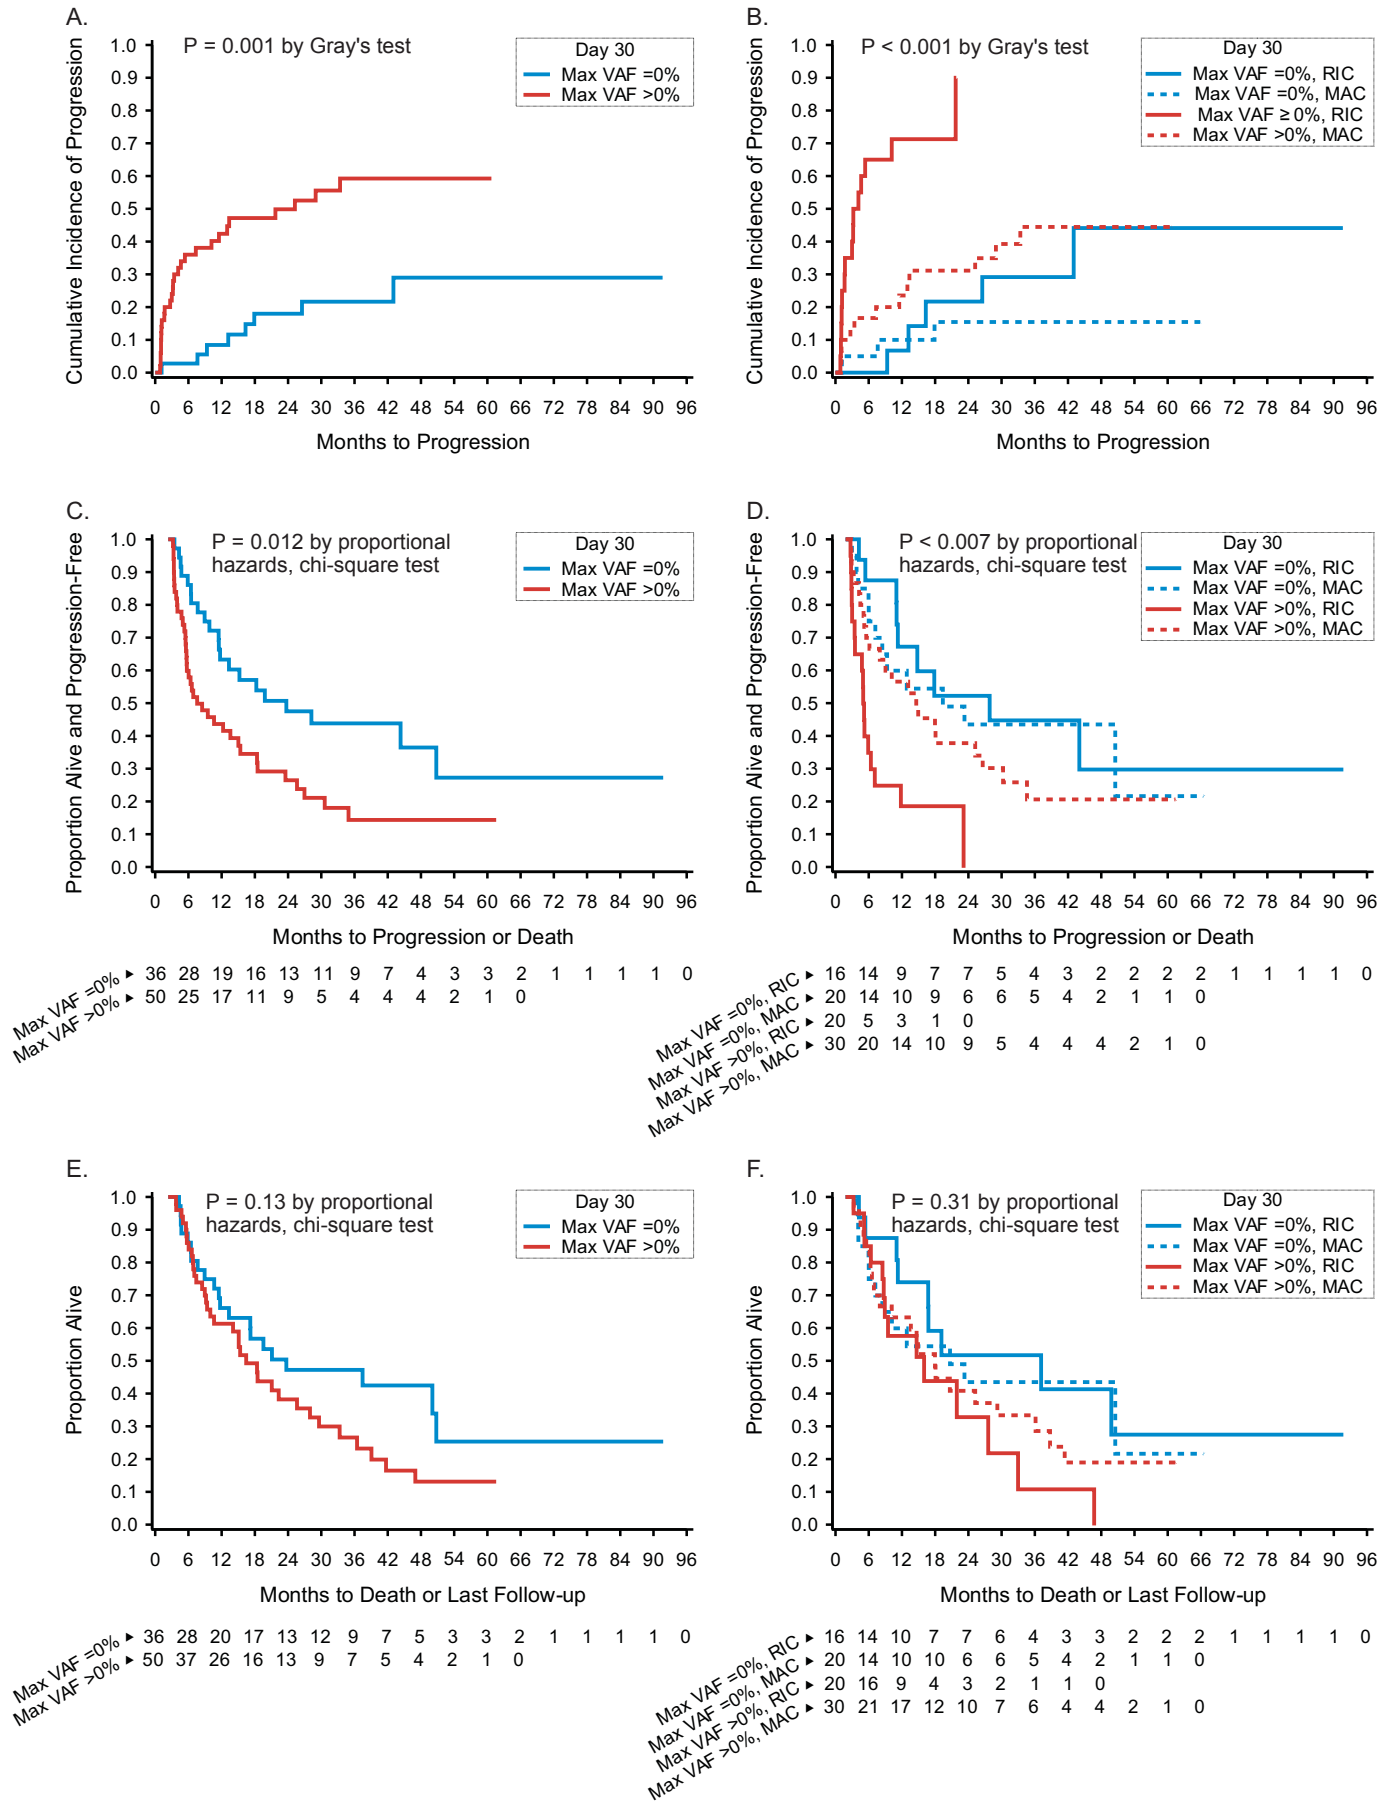

Figure S10. Association of Overall Survival with Mutation Clearance Determined by a 40 Gene-Panel

A.

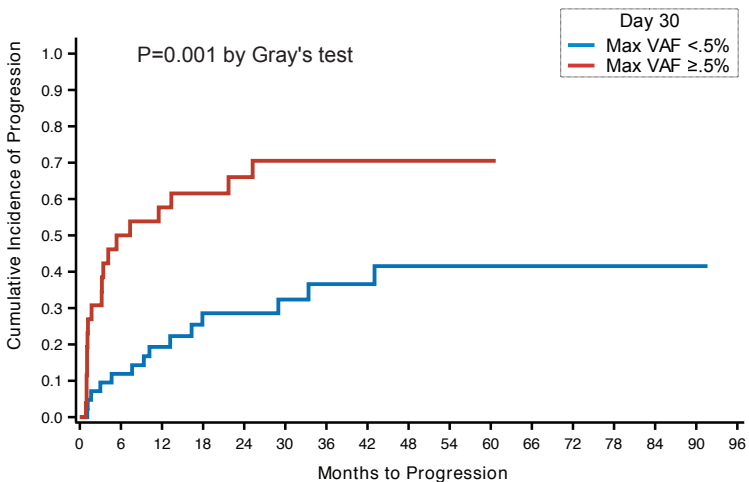

B.

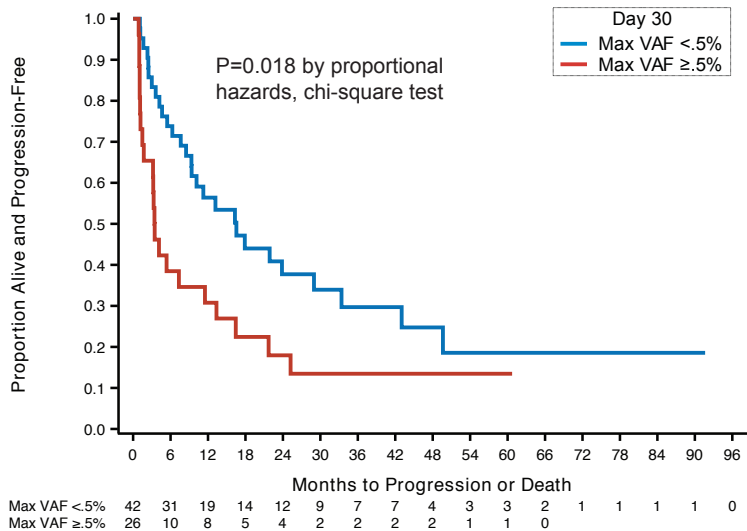

C.

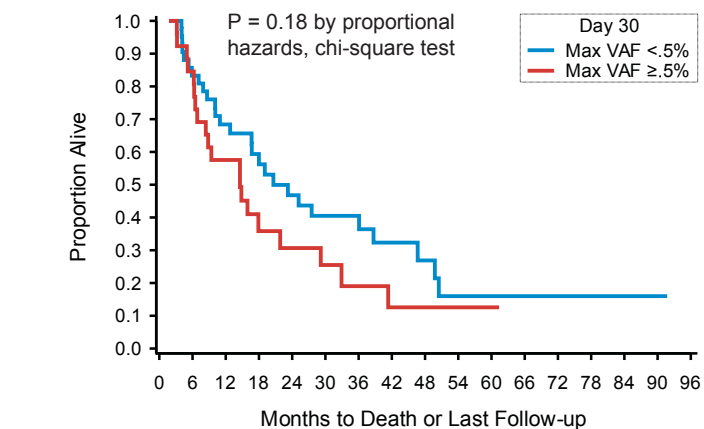

|              |   |    |    |    |    |    |    |   |   |   |   |   |   |   |   |   |   |   |
|--------------|---|----|----|----|----|----|----|---|---|---|---|---|---|---|---|---|---|---|
| Max VAF < 5% | ▶ | 42 | 34 | 22 | 17 | 14 | 11 | 9 | 8 | 5 | 3 | 3 | 2 | 1 | 1 | 1 | 1 | 0 |
| Max VAF ≥ 5% | ▶ | 26 | 18 | 14 | 7  | 6  | 4  | 3 | 2 | 2 | 1 | 1 | 0 |   |   |   |   |   |

D.

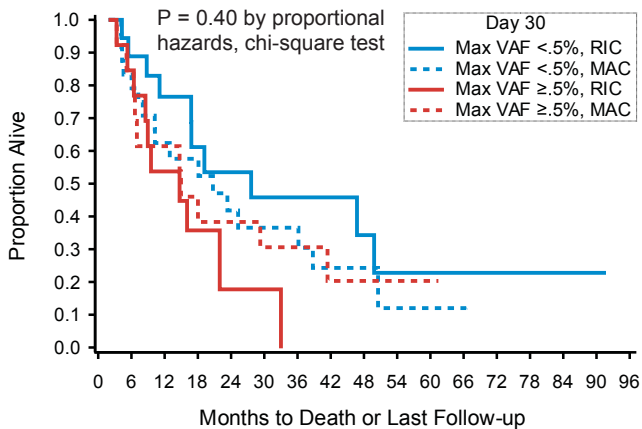

|                   |   |    |    |    |    |   |   |   |   |   |   |   |   |   |   |   |   |   |
|-------------------|---|----|----|----|----|---|---|---|---|---|---|---|---|---|---|---|---|---|
| Max VAF < 5%, RIC | ▶ | 18 | 16 | 11 | 7  | 7 | 5 | 4 | 4 | 3 | 2 | 2 | 2 | 1 | 1 | 1 | 1 | 0 |
| Max VAF < 5%, MAC | ▶ | 24 | 18 | 11 | 10 | 7 | 6 | 5 | 4 | 2 | 1 | 1 | 0 |   |   |   |   |   |
| Max VAF ≥ 5%, RIC | ▶ | 13 | 10 | 6  | 2  | 1 | 1 | 0 |   |   |   |   |   |   |   |   |   |   |
| Max VAF ≥ 5%, MAC | ▶ | 13 | 8  | 8  | 5  | 5 | 3 | 3 | 2 | 2 | 1 | 1 | 0 |   |   |   |   |   |

**Table S1. Recurrently Mutated Genes in AML and MDS**

| <b>ENSG ID</b>  | <b>Gene symbol</b> | <b>Chr</b> | <b>Start</b> | <b>End</b> | <b>Strand</b> |
|-----------------|--------------------|------------|--------------|------------|---------------|
| ENSG00000078369 | <i>GNB1</i>        | 1          | 1716729      | 1822495    | -             |
| ENSG00000120952 | <i>PRAMEF2</i>     | 1          | 12916941     | 12921764   | +             |
| ENSG00000065526 | <i>SPEN</i>        | 1          | 16174359     | 16266955   | +             |
| ENSG00000058453 | <i>CROCC</i>       | 1          | 17222232     | 17299474   | +             |
| ENSG00000142661 | <i>MYOM3</i>       | 1          | 24382525     | 24438665   | -             |
| ENSG00000162521 | <i>RBBP4</i>       | 1          | 33116749     | 33151812   | +             |
| ENSG00000188910 | <i>GJB3</i>        | 1          | 35246790     | 35251970   | +             |
| ENSG00000054118 | <i>THRAP3</i>      | 1          | 36690017     | 36770958   | +             |
| ENSG00000183317 | <i>EPHA10</i>      | 1          | 38179561     | 38230824   | -             |
| ENSG00000162434 | <i>JAK1</i>        | 1          | 65298906     | 65432187   | -             |
| ENSG00000162654 | <i>GBP4</i>        | 1          | 89646831     | 89664633   | -             |
| ENSG00000203914 | <i>HSP90B3P</i>    | 1          | 92100568     | 92109633   | +             |
| ENSG00000213281 | <i>NRAS</i>        | 1          | 115247078    | 115259515  | -             |
| ENSG00000143373 | <i>ZNF687</i>      | 1          | 151254094    | 151264381  | +             |
| ENSG00000143631 | <i>FLG</i>         | 1          | 152274651    | 152297679  | -             |
| ENSG00000160691 | <i>SHC1</i>        | 1          | 154934774    | 154946959  | -             |
| ENSG00000196189 | <i>SEMA4A</i>      | 1          | 156117157    | 156147543  | +             |
| ENSG00000162733 | <i>DDR2</i>        | 1          | 162601163    | 162750255  | +             |
| ENSG00000034971 | <i>MYOC</i>        | 1          | 171604557    | 171621811  | -             |
| ENSG00000198216 | <i>CACNA1E</i>     | 1          | 181382295    | 181770716  | +             |
| ENSG00000143341 | <i>HMCN1</i>       | 1          | 185703683    | 186160085  | +             |
| ENSG00000162670 | <i>BRINP3</i>      | 1          | 190066792    | 190446759  | -             |
| ENSG00000134369 | <i>NAV1</i>        | 1          | 201592411    | 201796097  | +             |
| ENSG00000084674 | <i>APOB</i>        | 2          | 21224301     | 21266945   | -             |
| ENSG00000119772 | <i>DNMT3A</i>      | 2          | 25455496     | 25565459   | -             |
| ENSG00000091106 | <i>NLRC4</i>       | 2          | 32449518     | 32490923   | -             |
| ENSG00000115808 | <i>STRN</i>        | 2          | 37070783     | 37193615   | -             |
| ENSG00000068878 | <i>PSME4</i>       | 2          | 54091204     | 54197977   | -             |
| ENSG00000135636 | <i>DYSF</i>        | 2          | 71680753     | 71913898   | +             |
| ENSG00000168702 | <i>LRP1B</i>       | 2          | 140988992    | 142889270  | -             |
| ENSG00000144285 | <i>SCN1A</i>       | 2          | 166845670    | 166930149  | -             |
| ENSG00000115524 | <i>SF3B1</i>       | 2          | 198256698    | 198299815  | -             |
| ENSG00000138413 | <i>IDH1</i>        | 2          | 209100951    | 209130798  | -             |
| ENSG00000078018 | <i>MAP2</i>        | 2          | 210288771    | 210598842  | +             |
| ENSG00000054356 | <i>PTPRN</i>       | 2          | 220154345    | 220174370  | -             |
| ENSG00000072195 | <i>SPEG</i>        | 2          | 220299568    | 220363009  | +             |
| ENSG00000204120 | <i>GIGYF2</i>      | 2          | 233562009    | 233725287  | +             |
| ENSG00000085978 | <i>ATG16L1</i>     | 2          | 234118697    | 234204320  | +             |
| ENSG00000168334 | <i>XIRP1</i>       | 3          | 39224701     | 39234087   | -             |
| ENSG00000008300 | <i>CELSR3</i>      | 3          | 48673896     | 48700348   | -             |
| ENSG00000164061 | <i>BSN</i>         | 3          | 49591922     | 49708982   | +             |
| ENSG00000157445 | <i>CACNA2D3</i>    | 3          | 54156574     | 55108584   | +             |
| ENSG00000163618 | <i>CADPS</i>       | 3          | 62384021     | 62861064   | -             |
| ENSG00000114861 | <i>FOXP1</i>       | 3          | 71003844     | 71633140   | -             |
| ENSG00000175161 | <i>CADM2</i>       | 3          | 85008132     | 86117951   | +             |
| ENSG00000145103 | <i>ILDR1</i>       | 3          | 121706170    | 121741051  | -             |
| ENSG00000173175 | <i>ADCY5</i>       | 3          | 123001143    | 123168605  | -             |
| ENSG00000114626 | <i>ABTB1</i>       | 3          | 127391778    | 127399763  | +             |
| ENSG00000179348 | <i>GATA2</i>       | 3          | 128198265    | 128212030  | -             |
| ENSG00000118007 | <i>STAG1</i>       | 3          | 136055077    | 136471220  | -             |
| ENSG00000090402 | <i>SI</i>          | 3          | 164696686    | 164796283  | -             |

|                 |                 |   |           |           |   |
|-----------------|-----------------|---|-----------|-----------|---|
| ENSG00000136527 | <i>TRA2B</i>    | 3 | 185632356 | 185655924 | - |
| ENSG00000038219 | <i>BOD1L1</i>   | 4 | 13570362  | 13629347  | - |
| ENSG00000047365 | <i>ARAP2</i>    | 4 | 36067620  | 36246131  | - |
| ENSG00000075539 | <i>FRYL</i>     | 4 | 48499378  | 48782339  | - |
| ENSG00000072201 | <i>LNK1</i>     | 4 | 54325468  | 54567572  | - |
| ENSG00000134853 | <i>PDGFRA</i>   | 4 | 55095264  | 55164414  | + |
| ENSG00000157404 | <i>KIT</i>      | 4 | 55524085  | 55606881  | + |
| ENSG00000128052 | <i>KDR</i>      | 4 | 55944426  | 55991762  | - |
| ENSG00000118777 | <i>ABCG2</i>    | 4 | 89011416  | 89152474  | - |
| ENSG00000168769 | <i>TET2</i>     | 4 | 106067032 | 106200973 | + |
| ENSG00000145362 | <i>ANK2</i>     | 4 | 113739239 | 114304896 | + |
| ENSG00000198589 | <i>LRBA</i>     | 4 | 151185594 | 151936879 | - |
| ENSG00000197410 | <i>DCHS2</i>    | 4 | 155155527 | 155412930 | - |
| ENSG00000039139 | <i>DNAH5</i>    | 5 | 13690437  | 13944652  | - |
| ENSG00000131711 | <i>MAP1B</i>    | 5 | 71403061  | 71505397  | + |
| ENSG00000164309 | <i>CMYA5</i>    | 5 | 78985659  | 79096063  | + |
| ENSG00000038427 | <i>VCAN</i>     | 5 | 82767284  | 82878122  | + |
| ENSG00000164176 | <i>EDIL3</i>    | 5 | 83236373  | 83680611  | - |
| ENSG00000120733 | <i>KDM3B</i>    | 5 | 137688285 | 137772717 | + |
| ENSG00000081842 | <i>PCDHA6</i>   | 5 | 140206816 | 140391929 | + |
| ENSG00000239389 | <i>PCDHA13</i>  | 5 | 140261793 | 140391929 | + |
| ENSG00000171815 | <i>PCDHB1</i>   | 5 | 140430961 | 140433547 | + |
| ENSG00000146001 | <i>PCDHB18</i>  | 5 | 140613936 | 140617101 | + |
| ENSG00000182578 | <i>CSF1R</i>    | 5 | 149432854 | 149492935 | - |
| ENSG00000019582 | <i>CD74</i>     | 5 | 149781200 | 149792332 | - |
| ENSG00000132911 | <i>NMUR2</i>    | 5 | 151771093 | 151784840 | - |
| ENSG00000118322 | <i>ATP10B</i>   | 5 | 159990127 | 160279219 | - |
| ENSG00000134516 | <i>DOCK2</i>    | 5 | 169064251 | 169510386 | + |
| ENSG00000181163 | <i>NPM1</i>     | 5 | 170814708 | 170838141 | + |
| ENSG00000113739 | <i>STC2</i>     | 5 | 172741716 | 172756506 | - |
| ENSG00000183258 | <i>DDX41</i>    | 5 | 176938578 | 176944470 | - |
| ENSG00000112739 | <i>PRPF4B</i>   | 6 | 4021501   | 4065217   | + |
| ENSG00000095951 | <i>HIVEP1</i>   | 6 | 12008995  | 12165232  | + |
| ENSG00000112137 | <i>PHACTR1</i>  | 6 | 12717833  | 13288075  | + |
| ENSG00000137411 | <i>VAR2</i>     | 6 | 30881982  | 30894233  | + |
| ENSG00000197283 | <i>SYNGAP1</i>  | 6 | 33387847  | 33421466  | + |
| ENSG00000096433 | <i>ITPR3</i>    | 6 | 33588522  | 33664351  | + |
| ENSG00000112624 | <i>GLTSCR1L</i> | 6 | 42714696  | 42836296  | + |
| ENSG00000146216 | <i>TTBK1</i>    | 6 | 43211222  | 43255997  | + |
| ENSG00000170927 | <i>PKHD1</i>    | 6 | 51480098  | 51952423  | - |
| ENSG00000151914 | <i>DST</i>      | 6 | 56322785  | 56819413  | - |
| ENSG00000079841 | <i>RIMS1</i>    | 6 | 72596406  | 73112508  | + |
| ENSG00000111799 | <i>COL12A1</i>  | 6 | 75794042  | 75915767  | - |
| ENSG00000146247 | <i>PHIP</i>     | 6 | 79644136  | 79788011  | - |
| ENSG00000164418 | <i>GRIK2</i>    | 6 | 101846664 | 102517958 | + |
| ENSG00000112333 | <i>NR2E1</i>    | 6 | 108487215 | 108510013 | + |
| ENSG00000213079 | <i>SCAF8</i>    | 6 | 155054459 | 155230002 | + |
| ENSG00000164619 | <i>BMPER</i>    | 7 | 33944523  | 34195484  | + |
| ENSG00000002746 | <i>HECW1</i>    | 7 | 43152198  | 43602938  | + |
| ENSG00000146648 | <i>EGFR</i>     | 7 | 55086714  | 55324313  | + |
| ENSG00000187391 | <i>MAGI2</i>    | 7 | 77646374  | 79082890  | - |
| ENSG00000075213 | <i>SEMA3A</i>   | 7 | 83587659  | 84122040  | - |
| ENSG00000198822 | <i>GRM3</i>     | 7 | 86273224  | 86494200  | + |
| ENSG00000066923 | <i>STAG3</i>    | 7 | 99775186  | 99819111  | + |
| ENSG00000154415 | <i>PPP1R3A</i>  | 7 | 113516832 | 113715975 | - |



|                 |                  |    |           |           |   |
|-----------------|------------------|----|-----------|-----------|---|
| ENSG00000105976 | <i>MET</i>       | 7  | 116312444 | 116438440 | + |
| ENSG00000179603 | <i>GRM8</i>      | 7  | 126078652 | 126893348 | - |
| ENSG00000128594 | <i>LRRC4</i>     | 7  | 127667124 | 127672160 | - |
| ENSG00000128578 | <i>STRIP2</i>    | 7  | 129073731 | 129128240 | + |
| ENSG00000269955 | <i>LUC7L2</i>    | 7  | 139026106 | 139107345 | + |
| ENSG00000157764 | <i>BRAF</i>      | 7  | 140419127 | 140624564 | - |
| ENSG00000197448 | <i>GSTK1</i>     | 7  | 142941186 | 142967947 | + |
| ENSG00000055130 | <i>CUL1</i>      | 7  | 148395006 | 148498202 | + |
| ENSG00000106462 | <i>EZH2</i>      | 7  | 148504475 | 148581414 | - |
| ENSG00000055118 | <i>KCNH2</i>     | 7  | 150642049 | 150675403 | - |
| ENSG00000055609 | <i>KMT2C</i>     | 7  | 151832007 | 152133628 | - |
| ENSG00000183117 | <i>CSMD1</i>     | 8  | 2792875   | 4852328   | - |
| ENSG00000164741 | <i>DLC1</i>      | 8  | 12940870  | 13372396  | - |
| ENSG00000215262 | <i>KCNU1</i>     | 8  | 36641842  | 36793643  | + |
| ENSG00000248522 | <i>SBF1P1</i>    | 8  | 56362069  | 56367699  | - |
| ENSG00000121005 | <i>CRISPLD1</i>  | 8  | 75896843  | 75946793  | + |
| ENSG00000079102 | <i>RUNX1T1</i>   | 8  | 92971152  | 93107443  | - |
| ENSG00000205038 | <i>PKHD1L1</i>   | 8  | 110374706 | 110543500 | + |
| ENSG00000164796 | <i>CSMD3</i>     | 8  | 113235157 | 114449328 | - |
| ENSG00000164754 | <i>RAD21</i>     | 8  | 117858173 | 117887105 | - |
| ENSG00000136997 | <i>MYC</i>       | 8  | 128747680 | 128753674 | + |
| ENSG00000226807 | <i>MROH5</i>     | 8  | 142443929 | 142517330 | - |
| ENSG00000227184 | <i>EPPK1</i>     | 8  | 144935822 | 144947434 | - |
| ENSG00000096968 | <i>JAK2</i>      | 9  | 4985033   | 5128183   | + |
| ENSG00000122735 | <i>DNAI1</i>     | 9  | 34457412  | 34520982  | + |
| ENSG00000083067 | <i>TRPM3</i>     | 9  | 73149949  | 74061820  | - |
| ENSG00000165119 | <i>HNRNPK</i>    | 9  | 86582998  | 86595569  | - |
| ENSG00000185920 | <i>PTCH1</i>     | 9  | 98205262  | 98279339  | - |
| ENSG00000197816 | <i>CCDC180</i>   | 9  | 100000779 | 100139569 | + |
| ENSG00000041982 | <i>TNC</i>       | 9  | 117782805 | 117880486 | - |
| ENSG00000106804 | <i>C5</i>        | 9  | 123714613 | 123837452 | - |
| ENSG00000107147 | <i>KCNT1</i>     | 9  | 138594031 | 138684992 | + |
| ENSG00000148408 | <i>CACNA1B</i>   | 9  | 140772241 | 141019076 | + |
| ENSG00000095787 | <i>WAC</i>       | 10 | 28821422  | 28911862  | + |
| ENSG00000204176 | <i>SYT15</i>     | 10 | 46955444  | 46971400  | - |
| ENSG00000138336 | <i>TET1</i>      | 10 | 70320117  | 70454239  | + |
| ENSG00000107731 | <i>UNC5B</i>     | 10 | 72972298  | 73062621  | + |
| ENSG00000148602 | <i>LRIT1</i>     | 10 | 85991276  | 86001217  | - |
| ENSG00000182771 | <i>GRID1</i>     | 10 | 87359312  | 88126250  | - |
| ENSG00000171862 | <i>PTEN</i>      | 10 | 89622870  | 89731687  | + |
| ENSG00000138193 | <i>PLCE1</i>     | 10 | 95753746  | 96088149  | + |
| ENSG00000166024 | <i>R3HCC1L</i>   | 10 | 99894381  | 100004654 | + |
| ENSG00000107593 | <i>PKD2L1</i>    | 10 | 102047903 | 102090243 | - |
| ENSG00000229256 | <i>ST13P13</i>   | 10 | 104975466 | 104976557 | + |
| ENSG00000108055 | <i>SMC3</i>      | 10 | 112327449 | 112364394 | + |
| ENSG00000165813 | <i>C10orf118</i> | 10 | 115880621 | 115934364 | - |
| ENSG00000117983 | <i>MUC5B</i>     | 11 | 1142474   | 1288726   | + |
| ENSG00000110328 | <i>GALNT18</i>   | 11 | 11292421  | 11643561  | - |
| ENSG00000129173 | <i>E2F8</i>      | 11 | 19245614  | 19263389  | - |
| ENSG00000182255 | <i>KCNA4</i>     | 11 | 30031765  | 30038488  | - |
| ENSG00000184937 | <i>WT1</i>       | 11 | 32409321  | 32457176  | - |
| ENSG00000149480 | <i>MTA2</i>      | 11 | 62360675  | 62369303  | - |
| ENSG00000168066 | <i>SF1</i>       | 11 | 64532078  | 64546258  | - |
| ENSG00000175591 | <i>P2RY2</i>     | 11 | 72929344  | 72947397  | + |
| ENSG00000074266 | <i>EED</i>       | 11 | 85955815  | 85989781  | + |

|                 |                 |    |           |           |   |
|-----------------|-----------------|----|-----------|-----------|---|
| ENSG00000165325 | <i>CCDC67</i>   | 11 | 93063883  | 93171636  | + |
| ENSG00000149972 | <i>CNTN5</i>    | 11 | 98891871  | 100227473 | + |
| ENSG00000187240 | <i>DYNC2H1</i>  | 11 | 102980160 | 103350591 | + |
| ENSG00000149295 | <i>DRD2</i>     | 11 | 113280317 | 113346001 | - |
| ENSG00000110395 | <i>CBL</i>      | 11 | 119076990 | 119178859 | + |
| ENSG00000149403 | <i>GRIK4</i>    | 11 | 120530971 | 120857132 | + |
| ENSG00000170953 | <i>OR8B12</i>   | 11 | 124412618 | 124413550 | - |
| ENSG00000111642 | <i>CHD4</i>     | 12 | 6679248   | 6716551   | - |
| ENSG00000139083 | <i>ETV6</i>     | 12 | 11802788  | 12048336  | + |
| ENSG00000111276 | <i>CDKN1B</i>   | 12 | 12867992  | 12875305  | + |
| ENSG00000133703 | <i>KRAS</i>     | 12 | 25358180  | 25403854  | - |
| ENSG0000013573  | <i>DDX11</i>    | 12 | 31226779  | 31257725  | + |
| ENSG00000167548 | <i>KMT2D</i>    | 12 | 49412758  | 49453557  | - |
| ENSG00000110844 | <i>PRPF40B</i>  | 12 | 49962001  | 50038449  | + |
| ENSG00000185640 | <i>KRT79</i>    | 12 | 53215231  | 53228079  | - |
| ENSG00000123411 | <i>IKZF4</i>    | 12 | 56414689  | 56432219  | + |
| ENSG00000139540 | <i>SLC39A5</i>  | 12 | 56623820  | 56631630  | + |
| ENSG00000179295 | <i>PTPN11</i>   | 12 | 112856536 | 112947717 | + |
| ENSG00000171435 | <i>KSR2</i>     | 12 | 117890817 | 118406060 | - |
| ENSG00000073060 | <i>SCARB1</i>   | 12 | 125262174 | 125348519 | - |
| ENSG00000198033 | <i>TUBA3C</i>   | 13 | 19747910  | 19755992  | - |
| ENSG00000122025 | <i>FLT3</i>     | 13 | 28577411  | 28674729  | - |
| ENSG00000102755 | <i>FLT1</i>     | 13 | 28874489  | 29069265  | - |
| ENSG00000132938 | <i>MTUS2</i>    | 13 | 29598748  | 30080084  | + |
| ENSG00000133119 | <i>RFC3</i>     | 13 | 34392186  | 34540695  | + |
| ENSG00000133083 | <i>DCLK1</i>    | 13 | 36343122  | 36705464  | - |
| ENSG00000150893 | <i>FREM2</i>    | 13 | 39261173  | 39461268  | + |
| ENSG00000139687 | <i>RB1</i>      | 13 | 48877887  | 49056122  | + |
| ENSG00000083520 | <i>DIS3</i>     | 13 | 73329540  | 73356344  | - |
| ENSG00000169508 | <i>GPR183</i>   | 13 | 99946784  | 99959749  | - |
| ENSG00000102452 | <i>NALCN</i>    | 13 | 101706130 | 102068843 | - |
| ENSG00000184497 | <i>TMEM255B</i> | 13 | 114462216 | 114514926 | + |
| ENSG00000183087 | <i>GAS6</i>     | 13 | 114523522 | 114567046 | - |
| ENSG00000257115 | <i>OR11H12</i>  | 14 | 19377594  | 19378574  | + |
| ENSG00000054690 | <i>PLEKHH1</i>  | 14 | 68000008  | 68056255  | + |
| ENSG00000021645 | <i>NRXN3</i>    | 14 | 78870093  | 80330762  | + |
| ENSG00000185070 | <i>FLRT2</i>    | 14 | 85996488  | 86094270  | + |
| ENSG00000152315 | <i>KCNK13</i>   | 14 | 90528108  | 90652199  | + |
| ENSG00000211897 | <i>IGHG3</i>    | 14 | 106230841 | 106237742 | - |
| ENSG00000198838 | <i>RYR3</i>     | 15 | 33603177  | 34158303  | + |
| ENSG00000188659 | <i>FAM154B</i>  | 15 | 82555140  | 82577268  | + |
| ENSG00000136383 | <i>ALPK3</i>    | 15 | 85359911  | 85416713  | + |
| ENSG00000170776 | <i>AKAP13</i>   | 15 | 85923871  | 86292586  | + |
| ENSG00000140538 | <i>NTRK3</i>    | 15 | 88402982  | 88799978  | - |
| ENSG00000182054 | <i>IDH2</i>     | 15 | 90626277  | 90645736  | - |
| ENSG00000103313 | <i>MEFV</i>     | 16 | 3292028   | 3306627   | - |
| ENSG00000157106 | <i>SMG1</i>     | 16 | 18816175  | 18937726  | - |
| ENSG00000149926 | <i>FAM57B</i>   | 16 | 30035748  | 30042194  | - |
| ENSG00000070915 | <i>SLC12A3</i>  | 16 | 56899119  | 56949762  | + |
| ENSG00000067955 | <i>CBFB</i>     | 16 | 67063050  | 67134961  | + |
| ENSG00000039523 | <i>FAM65A</i>   | 16 | 67562720  | 67580689  | + |
| ENSG00000102974 | <i>CTCF</i>     | 16 | 67596310  | 67673086  | + |
| ENSG00000039068 | <i>CDH1</i>     | 16 | 68771128  | 68869451  | + |
| ENSG00000157423 | <i>HYDIN</i>    | 16 | 70841289  | 71264569  | - |
| ENSG00000140839 | <i>CLEC18B</i>  | 16 | 74442529  | 74455649  | - |

|                 |                 |    |          |          |   |
|-----------------|-----------------|----|----------|----------|---|
| ENSG00000152910 | <i>CNTNAP4</i>  | 16 | 76311176 | 76593135 | + |
| ENSG00000166473 | <i>PKD1L2</i>   | 16 | 81134484 | 81253975 | - |
| ENSG00000158545 | <i>ZC3H18</i>   | 16 | 88636789 | 88698374 | + |
| ENSG00000187741 | <i>FANCA</i>    | 16 | 89803957 | 89883065 | - |
| ENSG00000187624 | <i>C17orf97</i> | 17 | 260118   | 264367   | + |
| ENSG00000174231 | <i>PRPF8</i>    | 17 | 1553923  | 1588176  | - |
| ENSG00000141510 | <i>TP53</i>     | 17 | 7565257  | 7590863  | - |
| ENSG00000264424 | <i>MYH4</i>     | 17 | 10346607 | 10372876 | - |
| ENSG00000007174 | <i>DNAH9</i>    | 17 | 11501748 | 11873485 | + |
| ENSG00000141027 | <i>NCOR1</i>    | 17 | 15932471 | 16121499 | - |
| ENSG00000196712 | <i>NF1</i>      | 17 | 29421945 | 29705949 | + |
| ENSG00000178691 | <i>SUZ12</i>    | 17 | 30264044 | 30328064 | + |
| ENSG00000171345 | <i>KRT19</i>    | 17 | 39679869 | 39684641 | - |
| ENSG00000073670 | <i>ADAM11</i>   | 17 | 42836568 | 42859214 | + |
| ENSG00000120071 | <i>KANSL1</i>   | 17 | 44107282 | 44270166 | - |
| ENSG00000006283 | <i>CACNA1G</i>  | 17 | 48638429 | 48704835 | + |
| ENSG00000141200 | <i>KIF2B</i>    | 17 | 51900239 | 51902573 | + |
| ENSG00000180891 | <i>CUEDC1</i>   | 17 | 55940337 | 56032684 | - |
| ENSG00000265206 | <i>MIR142</i>   | 17 | 56408593 | 56408679 | - |
| ENSG00000109066 | <i>TMEM104</i>  | 17 | 72772622 | 72835922 | + |
| ENSG00000161547 | <i>SRSF2</i>    | 17 | 74730197 | 74733413 | - |
| ENSG00000173821 | <i>RNF213</i>   | 17 | 78234665 | 78370085 | + |
| ENSG00000152217 | <i>SETBP1</i>   | 18 | 42260138 | 42648475 | + |
| ENSG00000167306 | <i>MYO5B</i>    | 18 | 47349101 | 47721384 | - |
| ENSG00000197561 | <i>ELANE</i>    | 19 | 851014   | 856242   | + |
| ENSG00000181143 | <i>MUC16</i>    | 19 | 8959520  | 9092018  | - |
| ENSG00000080573 | <i>COL5A3</i>   | 19 | 10070237 | 10121147 | - |
| ENSG00000105397 | <i>TYK2</i>     | 19 | 10461204 | 10491248 | - |
| ENSG00000179218 | <i>CALR</i>     | 19 | 13049414 | 13055304 | + |
| ENSG00000105639 | <i>JAK3</i>     | 19 | 17935591 | 17958870 | - |
| ENSG00000130518 | <i>KIAA1683</i> | 19 | 18367906 | 18385319 | - |
| ENSG00000105701 | <i>FKBP8</i>    | 19 | 18642568 | 18654383 | - |
| ENSG00000245848 | <i>CEBPA</i>    | 19 | 33790840 | 33793470 | - |
| ENSG00000126249 | <i>PDCD2L</i>   | 19 | 34895303 | 34917073 | + |
| ENSG00000196218 | <i>RYR1</i>     | 19 | 38924340 | 39078204 | + |
| ENSG00000090920 | <i>FCGBP</i>    | 19 | 40353963 | 40440533 | - |
| ENSG00000105429 | <i>MEGF8</i>    | 19 | 42829761 | 42882921 | + |
| ENSG00000063244 | <i>U2AF2</i>    | 19 | 56165512 | 56186081 | + |
| ENSG00000171456 | <i>ASXL1</i>    | 20 | 30946153 | 31027122 | + |
| ENSG00000088305 | <i>DNMT3B</i>   | 20 | 31350191 | 31397162 | + |
| ENSG00000196090 | <i>PTPRT</i>    | 20 | 40701392 | 41818610 | - |
| ENSG00000087460 | <i>GNAS</i>     | 20 | 57414773 | 57486247 | + |
| ENSG00000075043 | <i>KCNQ2</i>    | 20 | 62037542 | 62103993 | - |
| ENSG00000159216 | <i>RUNX1</i>    | 21 | 36160098 | 37357047 | - |
| ENSG00000171587 | <i>DSCAM</i>    | 21 | 41382926 | 42219065 | - |
| ENSG00000160201 | <i>U2AF1</i>    | 21 | 44513066 | 44527697 | - |
| ENSG00000099954 | <i>CECR2</i>    | 22 | 17840837 | 18033845 | + |
| ENSG00000100038 | <i>TOP3B</i>    | 22 | 21075651 | 22337213 | - |
| ENSG00000099995 | <i>SF3A1</i>    | 22 | 30727977 | 30752936 | - |
| ENSG00000146950 | <i>SHROOM2</i>  | X  | 9754496  | 9917483  | + |
| ENSG00000169249 | <i>ZRSR2</i>    | X  | 15808595 | 15841383 | + |
| ENSG00000102098 | <i>SCML2</i>    | X  | 18257433 | 18372847 | - |
| ENSG00000185448 | <i>FAM47A</i>   | X  | 34147873 | 34150428 | - |
| ENSG00000183337 | <i>BCOR</i>     | X  | 39909068 | 40036582 | - |
| ENSG00000124486 | <i>USP9X</i>    | X  | 40944888 | 41095832 | + |

|                 |                  |   |           |           |   |
|-----------------|------------------|---|-----------|-----------|---|
| ENSG00000147050 | <i>KDM6A</i>     | X | 44732423  | 44971847  | + |
| ENSG00000102145 | <i>GATA1</i>     | X | 48644962  | 48652716  | + |
| ENSG00000072501 | <i>SMC1A</i>     | X | 53401070  | 53449677  | - |
| ENSG00000102043 | <i>MTMR8</i>     | X | 63487961  | 63615311  | - |
| ENSG00000184634 | <i>MED12</i>     | X | 70338406  | 70362304  | + |
| ENSG00000215093 | <i>EEF1A1P29</i> | X | 85415268  | 85416363  | - |
| ENSG00000204071 | <i>TCEAL6</i>    | X | 101394933 | 101397942 | - |
| ENSG00000196507 | <i>TCEAL3</i>    | X | 102862379 | 102884618 | + |
| ENSG00000177485 | <i>ZBTB33</i>    | X | 119384607 | 119392251 | + |
| ENSG00000101972 | <i>STAG2</i>     | X | 123094062 | 123556514 | + |
| ENSG00000171054 | <i>OR13H1</i>    | X | 130677950 | 130679030 | + |
| ENSG00000156531 | <i>PHF6</i>      | X | 133507283 | 133562822 | + |
| ENSG00000156920 | <i>GPR112</i>    | X | 135383122 | 135499047 | + |
| ENSG00000067842 | <i>ATP2B3</i>    | X | 152783134 | 152848397 | + |

All genome coordinates use NCBI Build 37.

Chr, chromosome.



Table S3. Somatic Mutations (SNVs and indels) by Exome Sequencing

| UPN    | Chr | Start     | Stop      | Reference | Variant | Var Type | Gene Symbol  | Transcript_ID   | Strand | Mutation Type               | Coding Position | Amino Acid Change | Tier  | Normal    | Normal    | Tumor      |           |           |           |
|--------|-----|-----------|-----------|-----------|---------|----------|--------------|-----------------|--------|-----------------------------|-----------------|-------------------|-------|-----------|-----------|------------|-----------|-----------|-----------|
|        |     |           |           |           |         |          |              |                 |        |                             |                 |                   |       | Ref count | Var Count | Normal VAF | Ref Count | Var Count | Tumor VAF |
| 611    | 1   | 53547545  | 53547545  | C         | T       | SNP      | PODN         | ENST00000312553 | 1      | intronic                    | c.1806-108      | e10-108           | tier3 | 19        | 0         | 0.000      | 52        | 21        | 0.288     |
| 611    | 1   | 63153953  | 63153953  | C         | T       | SNP      | DOCK7        | ENST00000251157 | -1     | 5_prime_untranslated_region | c.-18           | NULL              | tier4 | 14        | 0         | 0.000      | 25        | 19        | 0.432     |
| 611    | 2   | 25464481  | 25464481  | G         | A       | SNP      | DNMT3A       | ENST00000264709 | -1     | nonsense                    | c.2032          | p.Q678*           | tier1 | 292       | 4         | 0.014      | 1146      | 70        | 0.057     |
| 611    | 3   | 31495819  | 31495819  | G         | A       | SNP      | THRAP3P1     | ENST00000411753 | 1      | 3_prime_untranslated_region | c.*31495819     | NULL              | tier3 | 462       | 0         | 0.000      | 769       | 311       | 0.288     |
| 611    | 3   | 64644370  | 64644370  | G         | A       | SNP      | ADAMTS9      | ENST00000498707 | -1     | silent                      | c.777           | p.S259            | tier1 | 79        | 2         | 0.025      | 140       | 68        | 0.327     |
| 611    | 3   | 130720537 | 130720537 | T         | A       | SNP      | ATP2C1       | ENST00000428331 | 1      | 3_prime_untranslated_region | c.*343          | NULL              | tier4 | 42        | 0         | 0.000      | 159       | 91        | 0.364     |
| 611    | 4   | 187540539 | 187540539 | C         | T       | SNP      | FAT1         | ENST00000441802 | -1     | missense                    | c.7201          | p.E2401K          | tier1 | 33        | 1         | 0.029      | 94        | 36        | 0.277     |
| 611    | 6   | 33037020  | 33037020  | G         | A       | SNP      | HLA-DPA1     | ENST00000419277 | -1     | missense                    | c.404           | p.T135I           | tier1 | 57        | 0         | 0.000      | 138       | 77        | 0.358     |
| 611    | 6   | 43206066  | 43206066  | C         | G       | SNP      | TTBK1        | ENST00000259750 | 1      | 5_prime_flanking_region     | c.-8333         | NULL              | tier4 | 58        | 0         | 0.000      | 177       | 49        | 0.217     |
| 611    | 7   | 45753309  | 45753309  | C         | T       | SNP      | ADCY1        | ENST00000297323 | 1      | silent                      | c.3075          | p.H1025           | tier1 | 91        | 2         | 0.021      | 92        | 56        | 0.378     |
| 611    | 7   | 100549883 | 100549883 | G         | A       | SNP      | LOC100131514 | ENST00000379458 | 1      | missense                    | c.464           | p.S155N           | tier1 | 19        | 0         | 0.000      | 51        | 28        | 0.350     |
| 611    | 8   | 17944578  | 17944578  | C         | T       | SNP      | LOC101929066 | ENST00000499554 | 1      | rna                         | NULL            | NULL              | tier1 | 85        | 0         | 0.000      | 182       | 79        | 0.303     |
| 611    | 8   | 72127533  | 72127533  | C         | T       | SNP      | EYA1         | ENST00000340726 | -1     | intronic                    | c.1597+89       | e14+89            | tier3 | 74        | 2         | 0.026      | 192       | 62        | 0.244     |
| 611    | 8   | 116424437 | 116424437 | G         | C       | SNP      | TRPS1        | ENST00000395715 | -1     | 3_prime_untranslated_region | c.*1814         | NULL              | tier3 | 26        | 0         | 0.000      | 69        | 29        | 0.287     |
| 611    | 8   | 140768932 | 140768932 | C         | T       | SNP      | TRAPPC9      | ENST00000389328 | -1     | intronic                    | c.3350-24487    | e22-24487         | tier3 | 64        | 1         | 0.015      | 97        | 35        | 0.263     |
| 611    | 9   | 103338826 | 103338826 | C         | T       | SNP      | TMEFF1       | ENST00000374879 | -1     | nonsense                    | c.1087          | p.R363*           | tier1 | 51        | 0         | 0.000      | 95        | 43        | 0.312     |
| 611    | 9   | 131502394 | 131502394 | G         | A       | SNP      | ZER1         | ENST00000291900 | 1      | silent                      | c.1858          | p.L620            | tier1 | 31        | 0         | 0.000      | 76        | 22        | 0.225     |
| 611    | 11  | 6648113   | 6648113   | C         | T       | SNP      | DCHS1        | ENST00000299441 | -1     | missense                    | c.6157          | p.V2053M          | tier1 | 58        | 0         | 0.000      | 93        | 32        | 0.254     |
| 611    | 11  | 25004690  | 25004690  | A         | G       | SNP      | LUZP2        | ENST00000336930 | 1      | missense                    | c.616           | p.M206V           | tier1 | 58        | 0         | 0.000      | 121       | 18        | 0.130     |
| 611    | 11  | 125298875 | 125298875 | C         | T       | SNP      | PKNOX2       | ENST00000298282 | 1      | intronic                    | c.937-33        | e8-33             | tier2 | 44        | 1         | 0.022      | 91        | 46        | 0.336     |
| 611    | 12  | 53553483  | 53553483  | T         | C       | SNP      | CSAD         | ENST00000267085 | -1     | missense                    | c.1313          | p.N438S           | tier1 | 23        | 0         | 0.000      | 90        | 33        | 0.266     |
| 611    | 14  | 23072764  | 23072764  | T         | A       | SNP      | ABHD4        | ENST00000539344 | 1      | 3_prime_untranslated_region | c.*23072764     | NULL              | tier3 | 86        | 1         | 0.011      | 160       | 61        | 0.276     |
| 611    | 14  | 104216205 | 104216205 | G         | A       | SNP      | PPP1R13B     | ENST00000202556 | -1     | missense                    | c.895           | p.R299C           | tier1 | 57        | 0         | 0.000      | 203       | 67        | 0.248     |
| 611    | 15  | 63615709  | 63615709  | A         | -       | DEL      | CA12         | ENST00000178638 | -1     | 3_prime_untranslated_region | c.*2775         | NULL              | tier2 | 45        | 1         | 0.022      | 77        | 24        | 0.238     |
| 611    | 15  | 66008017  | 66008017  | G         | A       | SNP      | DENND4A      | ENST00000443035 | -1     | intronic                    | c.1808-56       | e12-56            | tier4 | 34        | 0         | 0.000      | 99        | 42        | 0.296     |
| 611    | 16  | 3071729   | 3071729   | G         | A       | SNP      | TNFRSF12A    | ENST00000326577 | 1      | intronic                    | c.334+39        | e3+39             | tier2 | 27        | 0         | 0.000      | 76        | 28        | 0.269     |
| 611    | 17  | 3661144   | 3661144   | G         | A       | SNP      | ITGAE        | ENST00000263087 | -1     | silent                      | c.876           | p.L292            | tier1 | 56        | 0         | 0.000      | 142       | 43        | 0.232     |
| 611    | 17  | 5077452   | 5077452   | T         | C       | SNP      | USP6         | ENST00000250066 | 1      | 3_prime_untranslated_region | c.*1179         | NULL              | tier3 | 76        | 0         | 0.000      | 360       | 131       | 0.267     |
| 611    | 17  | 26087697  | 26087697  | G         | T       | SNP      | NOS2         | ENST00000313735 | -1     | missense                    | c.2962          | p.P988T           | tier1 | 160       | 2         | 0.012      | 318       | 166       | 0.342     |
| 611    | 17  | 29553477  | 29553478  | -         | C       | INS      | NF1          | ENST00000358273 | 1      | frame_shift_ins             | c.2026_2027     | p.I679fs          | tier1 | 207       | 0         | 0.000      | 653       | 174       | 0.210     |
| 611    | 18  | 42531913  | 42531913  | G         | A       | SNP      | SETBP1       | ENST00000282030 | 1      | missense                    | c.2608          | p.G870S           | tier1 | 445       | 4         | 0.009      | 798       | 358       | 0.310     |
| 611    | 19  | 39787541  | 39787541  | C         | T       | SNP      | IFNL1        | ENST00000333625 | 1      | intronic                    | c.249+19        | e2+19             | tier3 | 19        | 0         | 0.000      | 86        | 35        | 0.289     |
| 611    | 21  | 33684165  | 33684165  | A         | G       | SNP      | MRAP         | ENST00000303645 | 1      | missense                    | c.377           | p.E126G           | tier1 | 30        | 0         | 0.000      | 78        | 29        | 0.271     |
| 611    | 22  | 21480989  | 21480989  | G         | C       | SNP      | POM121L7     | ENST00000329949 | -1     | missense                    | c.937           | p.P313A           | tier1 | 49        | 0         | 0.000      | 111       | 40        | 0.261     |
| 611    | 22  | 23922123  | 23922123  | G         | A       | SNP      | IGLL1        | ENST00000330377 | -1     | intronic                    | c.206+49        | e1+49             | tier2 | 48        | 2         | 0.040      | 125       | 75        | 0.373     |
| 611    | X   | 9757836   | 9757836   | C         | T       | SNP      | SHROOM2      | ENST00000380913 | 1      | intronic                    | c.165+3086      | e1+3086           | tier3 | 98        | 0         | 0.000      | 203       | 45        | 0.182     |
| 130968 | 1   | 6101941   | 6101941   | T         | A       | SNP      | KCNAB2       | ENST00000164247 | 1      | splice_region               | c.119+9         | e2+9              | tier2 | 117       | 9         | 0.071      | 176       | 130       | 0.425     |
| 130968 | 1   | 115258747 | 115258747 | C         | T       | SNP      | NRAS         | ENST00000369535 | -1     | missense                    | c.35            | p.G12D            | tier1 | 290       | 0         | 0.000      | 656       | 113       | 0.141     |
| 130968 | 1   | 154960473 | 154960473 | C         | A       | SNP      | FLAD1        | ENST00000492620 | 1      | rna                         | NULL            | NULL              | tier1 | 32        | 0         | 0.000      | 96        | 22        | 0.186     |
| 130968 | 1   | 160144523 | 160144523 | C         | T       | SNP      | ATP1A4       | ENST00000368081 | 1      | missense                    | c.2297          | p.T766M           | tier1 | 59        | 0         | 0.000      | 75        | 41        | 0.350     |
| 130968 | 2   | 76975737  | 76975737  | G         | A       | SNP      | LRRTM4       | ENST00000409911 | -1     | 3_prime_untranslated_region | c.*84           | NULL              | tier3 | 61        | 0         | 0.000      | 110       | 32        | 0.222     |
| 130968 | 2   | 101554339 | 101554339 | C         | T       | SNP      | NPAS2        | ENST00000542504 | 1      | intronic                    | c.558+35        | e5+35             | tier3 | 42        | 0         | 0.000      | 113       | 27        | 0.193     |
| 130968 | 3   | 121100282 | 121100282 | C         | T       | SNP      | STXBP5L      | ENST00000273666 | 1      | silent                      | c.2562          | p.F854            | tier1 | 89        | 2         | 0.022      | 233       | 38        | 0.140     |
| 130968 | 3   | 140281105 | 140281105 | C         | T       | SNP      | CLSTN2       | ENST00000458420 | 1      | nonsense                    | c.2167          | p.R723*           | tier1 | 55        | 0         | 0.000      | 159       | 38        | 0.193     |
| 130968 | 3   | 141595701 | 141595701 | A         | G       | SNP      | ATP1B3       | ENST00000286371 | 1      | missense                    | c.58            | p.I20V            | tier1 | 4         | 0         | 0.000      | 5         | 18        | 0.783     |
| 130968 | 3   | 150877579 | 150877579 | A         | G       | SNP      | MED12L       | ENST00000474524 | 1      | intronic                    | c.838-40        | e7-40             | tier3 | 48        | 0         | 0.000      | 132       | 21        | 0.137     |
| 130968 | 4   | 57389885  | 57389885  | T         | G       | SNP      | ARL9         | ENST00000360096 | 1      | missense                    | c.215           | p.I72S            | tier1 | 97        | 2         | 0.020      | 153       | 99        | 0.391     |
| 130968 | 4   | 106157023 | 106157023 | C         | T       | SNP      | TET2         | ENST00000380013 | 1      | nonsense                    | c.1924          | p.Q642*           | tier1 | 413       | 7         | 0.017      | 712       | 422       | 0.372     |
| 130968 | 4   | 106164913 | 106164913 | C         | A       | SNP      | TET2         | ENST00000380013 | 1      | missense                    | c.3781          | p.R1261S          | tier1 | 214       | 16        | 0.070      | 378       | 265       | 0.412     |
| 130968 | 4   | 187541079 | 187541079 | C         | T       | SNP      | FAT1         | ENST00000441802 | -1     | missense                    | c.6661          | p.G2221R          | tier1 | 55        | 0         | 0.000      | 99        | 28        | 0.221     |
| 130968 | 6   | 27840011  | 27840011  | T         | A       | SNP      | HIST1H3I     | ENST00000328488 | -1     | missense                    | c.83            | p.K28M            | tier1 | 65        | 0         | 0.000      | 135       | 25        | 0.156     |
| 130968 | 6   | 56366476  | 56366476  | C         | T       | SNP      | DST          | ENST00000370754 | -1     | missense                    | c.19489         | p.A6497T          | tier1 | 260       | 11        | 0.041      | 578       | 402       | 0.410     |
| 130968 | 6   | 123869713 | 123869713 | G         | A       | SNP      | TRDN         | ENST00000398178 | -1     | missense                    | c.277           | p.R93C            | tier1 | 41        | 0         | 0.000      | 106       | 19        | 0.152     |
| 130968 | 7   | 30692952  | 30692953  | CC        | -       | DEL      | CRHR2        | ENST00000348438 | -1     | 3_prime_untranslated_region | c.*124          | NULL              | tier3 | 26        | 0         | 0.000      | 37        | 13        | 0.260     |
| 130968 | 7   | 30692957  | 30692965  | CTGGAGAGC | -       | DEL      | CRHR2        | ENST00000348438 | -1     | 3_prime_untranslated_region | c.*119          | NULL              | tier3 | 28        | 0         | 0.000      | 38        | 13        | 0.255     |
| 130968 | 7   | 45140023  | 45140031  | GACCTAGAA | -       | DEL      | TBRG4        | ENST00000258770 | -1     | splice_site_del             | c.1795-6_1795-1 | e10-1             | tier1 | 49        | 0         | 0.000      | 73        | 19        | 0.207     |
| 130968 | 7   | 135282052 | 135282052 | A         | -       | DEL      | NUP205       | ENST00000462316 | 1      | 3_prime_untranslated_region | c.*135282052    | NULL              | tier3 | 49        | 0         | 0.000      | 141       | 25        | 0.151     |
| 130968 | 10  | 126365553 | 126365553 | G         | A       | SNP      | FAM53B       | ENST00000337318 | -1     | intronic                    | c.906+4623      | e3+4623           | tier3 | 95        | 0         | 0.000      | 214       | 21        | 0.089     |
| 130968 | 11  | 121384952 | 121384952 | A         | G       | SNP      | SORL1        | ENST00000260197 | 1      | missense                    | c.1133          | p.E378G           | tier1 | 58        | 3         | 0.049      | 115       | 60        | 0.343     |
| 130968 | 12  | 51752848  | 51752848  | C         | T       | SNP      | GALNT6       | ENST00000356317 | -1     | intronic                    | c.1368+68       | e6+68             | tier3 | 40        | 3         | 0.070      | 71        | 55        | 0.437     |
| 13     |     |           |           |           |         |          |              |                 |        |                             |                 |                   |       |           |           |            |           |           |           |

|        |    |           |           |         |    |     |                        |                 |    |                             |                        |           |       |     |     |       |      |     |       |
|--------|----|-----------|-----------|---------|----|-----|------------------------|-----------------|----|-----------------------------|------------------------|-----------|-------|-----|-----|-------|------|-----|-------|
| 130968 | 21 | 36252865  | 36252865  | C       | T  | SNP | <i>RUNX1</i>           | ENST00000300305 | -1 | missense                    | c.497                  | p.R166Q   | tier1 | 743 | 7   | 0.009 | 1885 | 112 | 0.056 |
| 130968 | 21 | 39673268  | 39673268  | C       | T  | SNP | <i>KCNJ15</i>          | ENST00000328656 | 1  | 3_prime_untranslated_region | c.*957                 | NULL      | tier3 | 39  | 1   | 0.025 | 43   | 40  | 0.482 |
| 130968 | X  | 37028271  | 37028271  | G       | A  | SNP | <i>FAM47C</i>          | ENST00000358047 | 1  | silent                      | c.1788                 | p.P596    | tier1 | 144 | 1   | 0.007 | 218  | 83  | 0.276 |
| 130968 | X  | 39913253  | 39913253  | G       | -  | DEL | <i>BCOR</i>            | ENST00000378444 | -1 | frame_shift_del             | c.4862                 | p.P1621fs | tier1 | 267 | 6   | 0.022 | 604  | 232 | 0.278 |
| 130968 | X  | 107512279 | 107512279 | C       | T  | SNP | <i>COL4A6</i>          | ENST00000461897 | -1 | rna                         | NULL                   | NULL      | tier1 | 40  | 0   | 0.000 | 60   | 32  | 0.348 |
| 130968 | X  | 123197009 | 123197015 | CTCAGTA | -  | DEL | <i>STAG2</i>           | ENST00000218089 | 1  | frame_shift_del             | c.1775_1781            | p.Q593fs  | tier1 | 84  | 0   | 0.000 | 391  | 46  | 0.105 |
| 145094 | 1  | 16073346  | 16073346  | C       | T  | SNP | <i>TMEM82</i>          | ENST00000375782 | 1  | intronic                    | c.758-16               | e5-16     | tier3 | 38  | 2   | 0.050 | 318  | 275 | 0.463 |
| 145094 | 1  | 186084343 | 186084343 | G       | A  | SNP | <i>HMCN1</i>           | ENST00000271588 | 1  | intronic                    | c.11405-47             | e75-47    | tier3 | 181 | 1   | 0.006 | 442  | 331 | 0.428 |
| 145094 | 1  | 200880497 | 200880497 | C       | T  | SNP | <i>C1orf106</i>        | ENST00000367342 | 1  | intronic                    | c.1215-84              | e9-84     | tier2 | 72  | 0   | 0.000 | 200  | 149 | 0.427 |
| 145094 | 1  | 206945563 | 206945563 | C       | G  | SNP | <i>IL10</i>            | ENST00000423557 | -1 | intronic                    | c.165+53               | e1+53     | tier3 | 44  | 0   | 0.000 | 87   | 63  | 0.420 |
| 145094 | 2  | 116520209 | 116520209 | C       | T  | SNP | <i>DPP10</i>           | ENST00000393147 | 1  | intronic                    | c.1125+23              | e12+23    | tier3 | 63  | 1   | 0.016 | 93   | 84  | 0.475 |
| 145094 | 2  | 122004343 | 122004343 | C       | G  | SNP | <i>TFCP2L1</i>         | ENST00000263707 | -1 | intronic                    | c.657+51               | e6+51     | tier3 | 21  | 0   | 0.000 | 80   | 54  | 0.403 |
| 145094 | 2  | 233651863 | 233651863 | G       | A  | SNP | <i>GIGYF2</i>          | ENST00000373566 | 1  | missense                    | c.602                  | p.R201K   | tier1 | 256 | 0   | 0.000 | 502  | 463 | 0.479 |
| 145094 | 4  | 48563681  | 48563681  | G       | C  | SNP | <i>FRYL</i>            | ENST00000358350 | -1 | intronic                    | c.3697-28              | e30-28    | tier3 | 126 | 2   | 0.016 | 416  | 358 | 0.462 |
| 145094 | 4  | 54880073  | 54880073  | T       | C  | SNP | <i>CHIC2</i>           | ENST00000263921 | -1 | splice_region               | c.388-10               | e5-10     | tier3 | 95  | 0   | 0.000 | 149  | 122 | 0.450 |
| 145094 | 5  | 98868390  | 98868390  | A       | G  | SNP | <i>GUSBP8</i>          | ENST00000502652 | 1  | 3_prime_untranslated_region | c.*98868390            | NULL      | tier3 | 204 | 4   | 0.019 | 38   | 24  | 0.387 |
| 145094 | 6  | 131211458 | 131211458 | G       | A  | SNP | <i>EPB41L2</i>         | ENST00000337057 | -1 | missense                    | c.1636                 | p.R546W   | tier1 | 81  | 0   | 0.000 | 196  | 154 | 0.440 |
| 145094 | 7  | 2962258   | 2962258   | G       | A  | SNP | <i>CARD11</i>          | ENST00000396946 | -1 | splice_region               | c.2269+10              | e16+10    | tier3 | 20  | 0   | 0.000 | 84   | 56  | 0.400 |
| 145094 | 7  | 128520034 | 128520034 | G       | A  | SNP | <i>KCP</i>             | ENST00000297801 | -1 | 5_prime_untranslated_region | c.-128520034           | NULL      | tier2 | 30  | 0   | 0.000 | 60   | 32  | 0.348 |
| 145094 | 8  | 30702831  | 30702831  | C       | G  | SNP | <i>TEX15</i>           | ENST00000256246 | -1 | missense                    | c.3703                 | p.V1235L  | tier1 | 85  | 0   | 0.000 | 99   | 70  | 0.414 |
| 145094 | 8  | 86573767  | 86573767  | C       | T  | SNP | <i>REXO1L1</i>         | ENST00000379010 | -1 | missense                    | c.1960                 | p.V654I   | tier1 | 133 | 0   | 0.000 | 1637 | 135 | 0.076 |
| 145094 | 8  | 134239796 | 134239796 | A       | G  | SNP | <i>WISP1</i>           | ENST00000250160 | 1  | missense                    | c.947                  | p.K316R   | tier1 | 48  | 0   | 0.000 | 105  | 91  | 0.464 |
| 145094 | 9  | 35079180  | 35079180  | T       | G  | SNP | <i>FANCG</i>           | ENST00000378643 | -1 | missense                    | c.143                  | p.E48A    | tier1 | 26  | 0   | 0.000 | 94   | 84  | 0.472 |
| 145094 | 9  | 126029252 | 126029252 | C       | -  | DEL | <i>STRBP</i>           | ENST00000348403 | -1 | intronic                    | c.1+1463               | e0+1463   | tier3 | 38  | 0   | 0.000 | 62   | 45  | 0.421 |
| 145094 | 9  | 131115881 | 131115881 | G       | A  | SNP | <i>SLC27A4</i>         | ENST00000300456 | 1  | intronic                    | c.1324+61              | e8+61     | tier3 | 20  | 0   | 0.000 | 102  | 105 | 0.507 |
| 145094 | 10 | 18829133  | 18829133  | G       | C  | SNP | <i>CACNB2</i>          | ENST00000324631 | 1  | 3_prime_untranslated_region | c.*480                 | NULL      | tier3 | 88  | 0   | 0.000 | 93   | 95  | 0.505 |
| 145094 | 10 | 75526485  | 75526485  | A       | G  | SNP | <i>SEC24C</i>          | ENST00000339365 | 1  | intronic                    | c.1800-33              | e12-33    | tier3 | 78  | 0   | 0.000 | 100  | 107 | 0.517 |
| 145094 | 11 | 12183811  | 12183811  | C       | T  | SNP | <i>MICAL2</i>          | ENST00000256194 | 1  | nonsense                    | c.109                  | p.R37*    | tier1 | 81  | 0   | 0.000 | 197  | 165 | 0.456 |
| 145094 | 12 | 120638934 | 120638934 | C       | G  | SNP | <i>RPLP0</i>           | ENST00000228306 | -1 | 5_prime_untranslated_region | c.-348                 | NULL      | tier2 | 81  | 0   | 0.000 | 302  | 302 | 0.499 |
| 145094 | 15 | 45266191  | 45266191  | A       | G  | SNP | <i>C15orf43</i>        | ENST00000340827 | 1  | intronic                    | c.523+38               | e6+38     | tier2 | 70  | 0   | 0.000 | 118  | 98  | 0.454 |
| 145094 | 17 | 7577120   | 7577120   | C       | T  | SNP | <i>TP53</i>            | ENST00000269305 | -1 | missense                    | c.818                  | p.R273H   | tier1 | 195 | 5   | 0.025 | 66   | 803 | 0.923 |
| 145094 | 17 | 29552142  | 29552142  | -       | G  | INS | <i>NF1</i>             | ENST00000358273 | 1  | frame_shift_ins             | c.1875_1876            | p.L625fs  | tier1 | 163 | 0   | 0.000 | 91   | 316 | 0.776 |
| 145094 | 17 | 29552143  | 29552143  | C       | A  | SNP | <i>NF1</i>             | ENST00000358273 | 1  | missense                    | c.1876                 | p.L626I   | tier1 | 163 | 2   | 0.012 | 53   | 336 | 0.818 |
| 145094 | 17 | 45234327  | 45234327  | C       | T  | SNP | <i>CDC27</i>           | ENST00000531206 | -1 | missense                    | c.794                  | p.G265D   | tier1 | 126 | 0   | 0.000 | 299  | 19  | 0.060 |
| 145094 | 21 | 44324363  | 44324363  | G       | A  | SNP | <i>NDUFV3</i>          | ENST00000354250 | 1  | missense                    | c.1241                 | p.G414E   | tier1 | 47  | 1   | 0.021 | 96   | 77  | 0.445 |
| 145094 | X  | 18845595  | 18845595  | A       | T  | SNP | <i>PPEF1</i>           | ENST00000361511 | 1  | missense                    | c.1952                 | p.N651I   | tier1 | 61  | 1   | 0.016 | 4    | 106 | 0.964 |
| 147444 | 1  | 34164429  | 34164429  | G       | T  | SNP | <i>CSMD2</i>           | ENST00000373381 | -1 | missense                    | c.3849                 | p.S1283R  | tier1 | 80  | 0   | 0.000 | 126  | 38  | 0.232 |
| 147444 | 1  | 38262323  | 38262323  | C       | A  | SNP | <i>MANEAL</i>          | ENST00000373045 | 1  | intronic                    | c.661-93               | e3-93     | tier3 | 39  | 0   | 0.000 | 55   | 19  | 0.253 |
| 147444 | 1  | 89480937  | 89480937  | G       | A  | SNP | <i>GBP3</i>            | ENST00000370481 | -1 | intronic                    | c.318+33               | e2+33     | tier3 | 190 | 0   | 0.000 | 225  | 72  | 0.242 |
| 147444 | 1  | 120612014 | 120612014 | C       | A  | SNP | <i>NOTCH2</i>          | ENST00000256646 | -1 | missense                    | c.7                    | p.A3S     | tier1 | 41  | 0   | 0.000 | 87   | 16  | 0.155 |
| 147444 | 1  | 163306613 | 163306613 | C       | T  | SNP | <i>NUF2</i>            | ENST00000271452 | 1  | missense                    | c.410                  | p.T137M   | tier1 | 84  | 1   | 0.012 | 67   | 17  | 0.202 |
| 147444 | 1  | 201016781 | 201016781 | C       | T  | SNP | <i>CACNA1S</i>         | ENST00000362061 | -1 | intronic                    | c.4442-27              | e37-27    | tier3 | 57  | 0   | 0.000 | 70   | 22  | 0.239 |
| 147444 | 1  | 226061960 | 226061960 | G       | A  | SNP | <i>TMEM63A</i>         | ENST00000366835 | -1 | intronic                    | c.266+28               | e2+28     | tier3 | 30  | 0   | 0.000 | 50   | 17  | 0.254 |
| 147444 | 2  | 21229034  | 21229034  | T       | -  | DEL | <i>APOB</i>            | ENST00000233242 | -1 | frame_shift_del             | c.10706                | p.N3569fs | tier1 | 776 | 0   | 0.000 | 783  | 262 | 0.251 |
| 147444 | 2  | 42119915  | 42119915  | C       | A  | SNP | <i>LOC388942</i>       | ENST00000398796 | 1  | rna                         | NULL                   | NULL      | tier1 | 39  | 0   | 0.000 | 45   | 10  | 0.182 |
| 147444 | 2  | 42936013  | 42936013  | G       | T  | SNP | <i>MTA3</i>            | ENST00000405094 | 1  | splice_site                 | c.1303-1               | e14-1     | tier1 | 166 | 0   | 0.000 | 151  | 52  | 0.256 |
| 147444 | 2  | 128262356 | 128262356 | T       | C  | SNP | <i>IWS1</i>            | ENST00000295321 | -1 | missense                    | c.1123                 | p.M375V   | tier1 | 89  | 0   | 0.000 | 70   | 29  | 0.293 |
| 147444 | 2  | 138000072 | 138000072 | C       | T  | SNP | <i>THSD7B</i>          | ENST00000272643 | 1  | silent                      | c.2196                 | p.L732    | tier1 | 157 | 0   | 0.000 | 217  | 77  | 0.262 |
| 147444 | 2  | 216972458 | 216972458 | C       | G  | SNP | <i>XRCC5</i>           | ENST00000392133 | 1  | intronic                    | c.1+37                 | e0+37     | tier2 | 57  | 0   | 0.000 | 70   | 21  | 0.231 |
| 147444 | 3  | 158306755 | 158306755 | A       | T  | SNP | <i>MLF1</i>            | ENST00000392822 | 1  | intronic                    | c.96-3468              | e2-3468   | tier4 | 82  | 0   | 0.000 | 54   | 25  | 0.317 |
| 147444 | 4  | 74352793  | 74352793  | A       | -  | DEL | <i>AFM</i>             | ENST00000226355 | 1  | frame_shift_del             | c.592                  | p.V199fs  | tier1 | 83  | 0   | 0.000 | 84   | 35  | 0.294 |
| 147444 | 4  | 100761543 | 100761543 | C       | A  | SNP | <i>DAPP1</i>           | ENST00000512369 | 1  | missense                    | c.322                  | p.H108N   | tier1 | 92  | 0   | 0.000 | 61   | 12  | 0.164 |
| 147444 | 4  | 149358015 | 149358015 | C       | T  | SNP | <i>NR3C2</i>           | ENST00000355292 | -1 | splice_site                 | c.1-1                  | e1-1      | tier1 | 63  | 0   | 0.000 | 86   | 23  | 0.209 |
| 147444 | 5  | 1331845   | 1331845   | C       | T  | SNP | <i>CLPTM1L</i>         | ENST00000503042 | -1 | 5_prime_untranslated_region | c.-1331845             | NULL      | tier3 | 30  | 0   | 0.000 | 42   | 14  | 0.246 |
| 147444 | 5  | 38464253  | 38464253  | C       | T  | SNP | <i>EGFLAM</i>          | ENST00000354891 | 1  | 3_prime_untranslated_region | c.*165                 | NULL      | tier3 | 21  | 0   | 0.000 | 30   | 12  | 0.286 |
| 147444 | 5  | 39331903  | 39331903  | C       | T  | SNP | <i>C9</i>              | ENST00000263408 | -1 | missense                    | c.490                  | p.G164R   | tier1 | 80  | 1   | 0.012 | 80   | 33  | 0.292 |
| 147444 | 6  | 39841127  | 39841127  | G       | A  | SNP | <i>DAAM2</i>           | ENST00000274867 | 1  | missense                    | c.1158                 | p.M386I   | tier1 | 34  | 0   | 0.000 | 32   | 16  | 0.333 |
| 147444 | 6  | 72086766  | 72086766  | A       | G  | SNP | <i>LINC00472</i>       | ENST00000413945 | -1 | intronic                    | c.NULL                 | NULL      | tier3 | 80  | 0   | 0.000 | 79   | 15  | 0.160 |
| 147444 | 6  | 153603445 | 153603445 | C       | T  | SNP | <i>ENSG00000218426</i> | ENST00000492974 | -1 | 5_prime_untranslated_region | c.-153603445           | NULL      | tier2 | 93  | 0   | 0.000 | 87   | 36  | 0.293 |
| 147444 | 6  | 167571516 | 167571516 | G       | A  | SNP | <i>GPR31</i>           | ENST00000366834 | -1 | 5_prime_untranslated_region | c.-197                 | NULL      | tier3 | 92  | 0   | 0.000 | 91   | 31  | 0.254 |
| 147444 | 7  | 57522854  | 57522854  | A       | T  | SNP | <i>ZNF716</i>          | ENST00000420713 | 1  | missense                    | c.242                  | p.E81V    | tier1 | 144 | 0   | 0.000 | 66   | 23  | 0.258 |
| 147444 | 7  | 100190385 | 100190385 | C       | T  | SNP | <i>FBXO24</i>          | ENST00000427939 | 1  | intronic                    | c.673-21               | e5-21     | tier3 | 102 | 0   | 0.000 | 89   | 62  | 0.408 |
| 147444 | 7  | 157650971 | 157650971 | -       | CT | INS | <i>PTPRN2</i>          | ENST00000404321 | -1 | intronic                    | c.1857+40393_1857+4039 | e12+40393 | tier3 | 52  | 1   | 0.019 | 36   | 11  | 0.234 |
| 147444 | 9  | 33557962  | 33557962  | T       | C  | SNP | <i>ANKRD18B</i>        | ENST00000290943 | 1  | intronic                    | c.2145-94              | e12-94    | tier3 | 85  | 0   | 0.000 | 59   | 14  | 0.192 |
| 147444 | 9  | 43628454  | 43628454  | G       | A  | SNP | <i>SPATA31A6</i>       | ENST00000332857 | -1 | intronic                    | c.309-76               | e4-76     | tier3 | 120 | 0   | 0.000 | 135  | 44  | 0.246 |
| 147444 | 10 | 24762962  | 24762962  | C       | T  | SNP | <i>KIAA1217</i>        | ENST00000376454 | 1  | missense                    | c.1652                 | p.A551V   | tier1 | 63  | 2   | 0.031 | 109  | 27  | 0.199 |
| 147444 | 10 | 46148449  | 46148449  | A       | T  | SNP | <i>ZFAND4</i>          | ENST00000344646 | -1 | nonsense                    | c.243                  | p.Y81*    | tier1 | 39  | 0</ |       |      |     |       |



|        |    |           |           |   |   |     |                 |                 |    |                             |              |          |       |      |   |       |      |      |       |
|--------|----|-----------|-----------|---|---|-----|-----------------|-----------------|----|-----------------------------|--------------|----------|-------|------|---|-------|------|------|-------|
| 147444 | 16 | 4384836   | 4384836   | C | T | SNP | GLIS2           | ENST00000262366 | 1  | missense                    | c.380        | p.P127L  | tier1 | 97   | 0 | 0.000 | 120  | 35   | 0.224 |
| 147444 | 16 | 68721437  | 68721437  | G | A | SNP | CDH3            | ENST00000264012 | 1  | silent                      | c.1593       | p.T531   | tier1 | 41   | 0 | 0.000 | 45   | 36   | 0.444 |
| 147444 | 17 | 6902088   | 6902088   | T | A | SNP | ALOX12          | ENST00000251535 | 1  | missense                    | c.474        | p.D158E  | tier1 | 116  | 0 | 0.000 | 147  | 31   | 0.174 |
| 147444 | 17 | 7578212   | 7578212   | G | A | SNP | TP53            | ENST00000269305 | -1 | nonsense                    | c.637        | p.R213*  | tier1 | 1150 | 2 | 0.002 | 981  | 1049 | 0.515 |
| 147444 | 17 | 42981590  | 42981590  | C | T | SNP | FAM187A         | ENST00000331733 | 1  | silent                      | c.393        | p.D131   | tier1 | 39   | 0 | 0.000 | 49   | 13   | 0.210 |
| 147444 | 17 | 67079228  | 67079228  | T | C | SNP | ABCA6           | ENST00000284425 | -1 | intronic                    | c.4476-74    | e35-74   | tier3 | 110  | 0 | 0.000 | 93   | 31   | 0.250 |
| 147444 | 19 | 15511862  | 15511862  | A | G | SNP | AKAP8L          | ENST00000397410 | -1 | splice_region               | c.817-8      | e6-8     | tier3 | 41   | 0 | 0.000 | 80   | 21   | 0.208 |
| 147444 | 22 | 29886361  | 29886361  | C | T | SNP | NEFH            | ENST00000310624 | 1  | missense                    | c.2732       | p.P911L  | tier1 | 39   | 0 | 0.000 | 46   | 16   | 0.258 |
| 147444 | X  | 49857254  | 49857254  | C | T | SNP | CLCN5           | ENST00000376088 | 1  | 3_prime_untranslated_region | c.*378       | NULL     | tier3 | 70   | 1 | 0.014 | 33   | 15   | 0.313 |
| 147457 | 1  | 809179    | 809179    | G | A | SNP | ENSG00000234711 | ENST00000415481 | 1  | 3_prime_untranslated_region | c.*809179    | NULL     | tier2 | 69   | 0 | 0.000 | 523  | 203  | 0.279 |
| 147457 | 1  | 1275514   | 1275514   | G | A | SNP | DVL1            | ENST00000378888 | -1 | silent                      | c.813        | p.N271   | tier1 | 38   | 1 | 0.025 | 174  | 77   | 0.307 |
| 147457 | 1  | 1861568   | 1861568   | G | A | SNP | C1orf222        | ENST00000493964 | -1 | silent                      | c.1068       | p.F356   | tier1 | 35   | 0 | 0.000 | 212  | 88   | 0.293 |
| 147457 | 1  | 6021933   | 6021933   | C | T | SNP | NPHP4           | ENST00000378156 | -1 | silent                      | c.594        | p.A198   | tier1 | 29   | 0 | 0.000 | 143  | 57   | 0.285 |
| 147457 | 1  | 6532561   | 6532561   | C | T | SNP | PLEKHG5         | ENST00000537245 | -1 | intronic                    | c.1317+26    | e11+26   | tier2 | 23   | 0 | 0.000 | 110  | 39   | 0.262 |
| 147457 | 1  | 9790439   | 9790439   | C | T | SNP | CLSTN1          | ENST00000477264 | -1 | 5_prime_untranslated_region | c.-9790439   | NULL     | tier2 | 35   | 1 | 0.028 | 270  | 116  | 0.299 |
| 147457 | 1  | 12908093  | 12908093  | C | T | SNP | HNRNPCL1        | ENST00000317869 | -1 | missense                    | c.50         | p.R17H   | tier1 | 490  | 1 | 0.002 | 1500 | 165  | 0.099 |
| 147457 | 1  | 15701093  | 15701093  | G | A | SNP | FHAD1           | ENST00000481324 | 1  | missense                    | c.526        | p.A176T  | tier1 | 29   | 0 | 0.000 | 139  | 55   | 0.284 |
| 147457 | 1  | 21605671  | 21605671  | C | T | SNP | ECE1            | ENST00000374893 | -1 | intronic                    | c.280+13     | e3+13    | tier3 | 16   | 0 | 0.000 | 215  | 97   | 0.311 |
| 147457 | 1  | 22852716  | 22852716  | G | A | SNP | ZBTB40          | ENST00000375647 | 1  | missense                    | c.3547       | p.V1183M | tier1 | 20   | 0 | 0.000 | 195  | 75   | 0.278 |
| 147457 | 1  | 22902834  | 22902834  | G | A | SNP | EPHA8           | ENST00000166244 | 1  | missense                    | c.284        | p.R95Q   | tier1 | 83   | 0 | 0.000 | 211  | 64   | 0.230 |
| 147457 | 1  | 24385364  | 24385364  | G | A | SNP | MYOM3           | ENST00000330966 | -1 | intronic                    | c.4059+50    | e35+50   | tier3 | 109  | 0 | 0.000 | 485  | 204  | 0.296 |
| 147457 | 1  | 24410953  | 24410953  | C | T | SNP | MYOM3           | ENST00000475306 | -1 | 5_prime_untranslated_region | c.-24410953  | NULL     | tier3 | 227  | 3 | 0.013 | 635  | 306  | 0.325 |
| 147457 | 1  | 24671443  | 24671443  | C | T | SNP | GRHL3           | ENST00000350501 | 1  | intronic                    | c.1454+22    | e12+22   | tier3 | 21   | 0 | 0.000 | 94   | 42   | 0.309 |
| 147457 | 1  | 26773790  | 26773790  | G | A | SNP | DHDDS           | ENST00000360009 | 1  | intronic                    | c.441-260    | e5-260   | tier4 | 191  | 5 | 0.025 | 142  | 49   | 0.257 |
| 147457 | 1  | 27220835  | 27220835  | G | A | SNP | GPATCH3         | ENST00000361720 | -1 | missense                    | c.943        | p.R315W  | tier1 | 60   | 0 | 0.000 | 180  | 90   | 0.333 |
| 147457 | 1  | 27708286  | 27708286  | C | T | SNP | CD164L2         | ENST00000374030 | -1 | silent                      | c.357        | p.P119   | tier1 | 49   | 0 | 0.000 | 164  | 85   | 0.341 |
| 147457 | 1  | 29365837  | 29365837  | G | A | SNP | EPB41           | ENST00000343067 | 1  | missense                    | c.1535       | p.R512Q  | tier1 | 91   | 0 | 0.000 | 271  | 103  | 0.275 |
| 147457 | 1  | 29609283  | 29609283  | C | T | SNP | PTPRU           | ENST00000345512 | 1  | missense                    | c.1964       | p.A655V  | tier1 | 26   | 1 | 0.037 | 143  | 75   | 0.343 |
| 147457 | 1  | 31186218  | 31186218  | G | A | SNP | MATN1           | ENST00000373765 | -1 | 3_prime_untranslated_region | c.*211       | NULL     | tier3 | 92   | 1 | 0.011 | 219  | 81   | 0.270 |
| 147457 | 1  | 32090677  | 32090677  | G | A | SNP | HCRTR1          | ENST00000373706 | 1  | missense                    | c.1045       | p.A349T  | tier1 | 23   | 0 | 0.000 | 113  | 54   | 0.321 |
| 147457 | 1  | 37316001  | 37316001  | C | T | SNP | GRIK3           | ENST00000373091 | -1 | missense                    | c.1237       | p.G413R  | tier1 | 33   | 0 | 0.000 | 188  | 71   | 0.274 |
| 147457 | 1  | 43618426  | 43618426  | C | T | SNP | FAM183A         | ENST00000335282 | 1  | intronic                    | c.194-73     | e3-73    | tier3 | 34   | 2 | 0.056 | 115  | 56   | 0.328 |
| 147457 | 1  | 43897426  | 43897426  | C | T | SNP | SZT2            | ENST00000562955 | 1  | nonsense                    | c.4957       | p.R1653* | tier1 | 24   | 0 | 0.000 | 107  | 47   | 0.305 |
| 147457 | 1  | 46206734  | 46206734  | C | T | SNP | IPP             | ENST00000396478 | -1 | missense                    | c.563        | p.R188Q  | tier1 | 101  | 0 | 0.000 | 175  | 68   | 0.280 |
| 147457 | 1  | 52826134  | 52826134  | C | T | SNP | CC2D1B          | ENST00000371586 | -1 | missense                    | c.565        | p.E189K  | tier1 | 20   | 0 | 0.000 | 242  | 128  | 0.344 |
| 147457 | 1  | 54670978  | 54670978  | G | A | SNP | MRPL37          | ENST00000360840 | 1  | missense                    | c.541        | p.V181M  | tier1 | 41   | 0 | 0.000 | 107  | 48   | 0.310 |
| 147457 | 1  | 57085113  | 57085113  | C | T | SNP | ENSG00000225475 | ENST00000442812 | -1 | 5_prime_untranslated_region | c.-57085113  | NULL     | tier3 | 233  | 2 | 0.009 | 451  | 206  | 0.313 |
| 147457 | 1  | 74905278  | 74905278  | C | T | SNP | FPGT-TNNI3K     | ENST00000370891 | 1  | silent                      | c.2286       | p.G762   | tier1 | 109  | 0 | 0.000 | 169  | 76   | 0.309 |
| 147457 | 1  | 78031830  | 78031830  | G | A | SNP | ZZZ3            | ENST00000370801 | -1 | missense                    | c.2503       | p.R835W  | tier1 | 147  | 1 | 0.007 | 282  | 133  | 0.321 |
| 147457 | 1  | 110217523 | 110217523 | C | T | SNP | GSTM2           | ENST00000241337 | 1  | 3_prime_untranslated_region | c.*65        | NULL     | tier3 | 16   | 0 | 0.000 | 149  | 64   | 0.301 |
| 147457 | 1  | 116609238 | 116609238 | C | T | SNP | SLC22A15        | ENST00000369503 | 1  | missense                    | c.1463       | p.P488L  | tier1 | 132  | 0 | 0.000 | 222  | 95   | 0.300 |
| 147457 | 1  | 149914970 | 149914970 | C | T | SNP | OTUD7B          | ENST00000369135 | -1 | 3_prime_untranslated_region | c.*786       | NULL     | tier3 | 36   | 0 | 0.000 | 100  | 49   | 0.329 |
| 147457 | 1  | 151507600 | 151507600 | G | A | SNP | CGN             | ENST00000271636 | 1  | missense                    | c.2987       | p.R996Q  | tier1 | 52   | 0 | 0.000 | 133  | 67   | 0.333 |
| 147457 | 1  | 155019719 | 155019719 | C | T | SNP | DCST1           | ENST00000295542 | 1  | missense                    | c.1543       | p.R515W  | tier1 | 78   | 1 | 0.013 | 288  | 125  | 0.303 |
| 147457 | 1  | 155584452 | 155584452 | C | T | SNP | MSTO1           | ENST00000245564 | 1  | 3_prime_untranslated_region | c.*388       | NULL     | tier3 | 48   | 1 | 0.020 | 203  | 91   | 0.309 |
| 147457 | 1  | 156437379 | 156437379 | G | A | SNP | MEF2D           | ENST00000464356 | -1 | 5_prime_untranslated_region | c.-156437379 | NULL     | tier3 | 58   | 2 | 0.033 | 382  | 175  | 0.314 |
| 147457 | 1  | 156713349 | 156713349 | G | A | SNP | HDGF            | ENST00000477306 | -1 | 5_prime_untranslated_region | c.-156713349 | NULL     | tier3 | 24   | 1 | 0.040 | 135  | 75   | 0.356 |
| 147457 | 1  | 160604556 | 160604556 | G | A | SNP | SLAMF1          | ENST00000302035 | -1 | missense                    | c.547        | p.H183Y  | tier1 | 53   | 1 | 0.019 | 230  | 124  | 0.348 |
| 147457 | 1  | 162492585 | 162492585 | C | T | SNP | UHMK1           | ENST00000489294 | 1  | 3_prime_untranslated_region | c.*245       | NULL     | tier3 | 47   | 0 | 0.000 | 106  | 47   | 0.307 |
| 147457 | 1  | 165182958 | 165182958 | G | A | SNP | LMX1A           | ENST00000294816 | -1 | missense                    | c.589        | p.R197C  | tier1 | 120  | 0 | 0.000 | 220  | 83   | 0.273 |
| 147457 | 1  | 171308645 | 171308645 | C | T | SNP | TOP1P1          | ENST00000404238 | 1  | 3_prime_untranslated_region | c.*171308645 | NULL     | tier3 | 127  | 5 | 0.038 | 261  | 121  | 0.316 |
| 147457 | 1  | 172410952 | 172410952 | G | A | SNP | PIGC            | ENST00000258324 | -1 | missense                    | c.811        | p.R271C  | tier1 | 122  | 0 | 0.000 | 184  | 77   | 0.294 |
| 147457 | 1  | 175014844 | 175014844 | G | A | SNP | TNN             | ENST00000239462 | 1  | 5_prime_flanking_region     | c.-31711     | NULL     | tier2 | 85   | 0 | 0.000 | 101  | 54   | 0.346 |
| 147457 | 1  | 186010193 | 186010193 | G | A | SNP | HMCN1           | ENST00000271588 | 1  | missense                    | c.6229       | p.D2077N | tier1 | 111  | 3 | 0.026 | 374  | 166  | 0.307 |
| 147457 | 1  | 200183198 | 200183198 | C | T | SNP | FAM58BP         | ENST00000424019 | 1  | 3_prime_untranslated_region | c.*200183198 | NULL     | tier2 | 34   | 1 | 0.029 | 242  | 88   | 0.267 |
| 147457 | 1  | 201168470 | 201168470 | C | T | SNP | IGFN1           | ENST00000335211 | 1  | missense                    | c.376        | p.R126W  | tier1 | 40   | 1 | 0.024 | 144  | 75   | 0.343 |
| 147457 | 1  | 201184183 | 201184183 | G | A | SNP | IGFN1           | ENST00000335211 | 1  | missense                    | c.8896       | p.V2966M | tier1 | 16   | 0 | 0.000 | 134  | 56   | 0.293 |
| 147457 | 1  | 201983055 | 201983055 | G | A | SNP | ELF3            | ENST00000359651 | 1  | missense                    | c.904        | p.V302I  | tier1 | 18   | 0 | 0.000 | 113  | 52   | 0.313 |
| 147457 | 1  | 205064086 | 205064086 | C | T | SNP | RBBP5           | ENST00000264515 | -1 | silent                      | c.1503       | p.P501   | tier1 | 92   | 0 | 0.000 | 224  | 72   | 0.243 |
| 147457 | 1  | 213058620 | 213058620 | G | A | SNP | FLVCR1          | ENST00000366971 | 1  | intronic                    | c.1093-15    | e5-15    | tier3 | 150  | 1 | 0.007 | 217  | 98   | 0.311 |
| 147457 | 1  | 215298011 | 215298011 | G | A | SNP | KCNK2           | ENST00000444842 | 1  | silent                      | c.393        | p.P131   | tier1 | 103  | 2 | 0.019 | 216  | 85   | 0.282 |
| 147457 | 1  | 220340567 | 220340567 | G | A | SNP | RAB3GAP2        | ENST00000358951 | -1 | intronic                    | c.3087+68    | e26+68   | tier3 | 59   | 1 | 0.017 | 67   | 32   | 0.323 |
| 147457 | 1  | 228033658 | 228033658 | G | A | SNP | PRSS38          | ENST00000366757 | 1  | missense                    | c.730        | p.D244N  | tier1 | 22   | 0 | 0.000 | 70   | 24   | 0.255 |
| 147457 | 1  | 232944031 | 232944031 | G | A | SNP | KIAA1383        | ENST00000418460 | 1  | 3_prime_untranslated_region | c.*118       | NULL     | tier3 | 115  | 0 | 0.000 | 187  | 75   | 0.286 |
| 147457 | 1  | 236898908 | 236898908 | G | A | SNP | ACTN2           | ENST00000366578 | 1  | intronic                    | c.698-27     | e8-27    | tier3 | 48   | 0 | 0.000 | 62   | 29   | 0.319 |
| 147457 | 1  | 244230451 | 244230451 | C | T | SNP | ENSG00000237759 | ENST00000440148 | 1  | 5_prime_flanking_region     | c.-40216     | NULL     | tier3 | 53   | 2 | 0.036 | 162  | 66   | 0.290 |
| 147457 | 2  | 1271318   | 1271318   | C | T | SNP | SNTG2           | ENST00000308624 | 1  | missense                    | c.1259       | p.T420M  | tier1 | 48   | 0 | 0.000 | 112  | 46   | 0.291 |
| 147457 | 2  | 1652185   | 1652185   | C | T | SNP | PXDN            | ENST00000252804 | -1 | missense                    | c.3367       | p.G1123R | tier1 | 22   | 0 | 0.000 | 153  | 69   | 0.308 |
| 147457 | 2  | 3469478   | 3469478   | C | T | SNP |                 |                 |    |                             |              |          |       |      |   |       |      |      |       |



|        |   |           |           |   |   |     |                        |                 |    |                             |              |           |       |     |   |       |      |     |       |
|--------|---|-----------|-----------|---|---|-----|------------------------|-----------------|----|-----------------------------|--------------|-----------|-------|-----|---|-------|------|-----|-------|
| 147457 | 2 | 25466800  | 25466800  | G | A | SNP | <i>DNMT3A</i>          | ENST00000264709 | -1 | missense                    | c.1903       | p.R635W   | tier1 | 165 | 2 | 0.012 | 704  | 291 | 0.292 |
| 147457 | 2 | 25469932  | 25469932  | G | A | SNP | <i>DNMT3A</i>          | ENST00000264709 | -1 | silent                      | c.1110       | p.Y370    | tier1 | 143 | 1 | 0.007 | 570  | 249 | 0.304 |
| 147457 | 2 | 26177162  | 26177162  | G | A | SNP | <i>KIF3C</i>           | ENST00000264712 | -1 | silent                      | c.1863       | p.N621    | tier1 | 25  | 0 | 0.000 | 165  | 46  | 0.217 |
| 147457 | 2 | 26644243  | 26644243  | G | A | SNP | <i>CCDC164</i>         | ENST00000288710 | 1  | missense                    | c.331        | p.E111K   | tier1 | 120 | 3 | 0.024 | 190  | 89  | 0.319 |
| 147457 | 2 | 26800492  | 26800492  | G | A | SNP | <i>C2orf70</i>         | ENST00000329615 | 1  | missense                    | c.457        | p.V153I   | tier1 | 28  | 0 | 0.000 | 185  | 71  | 0.276 |
| 147457 | 2 | 27261955  | 27261955  | C | T | SNP | <i>TMEM214</i>         | ENST00000238788 | 1  | missense                    | c.1448       | p.T483M   | tier1 | 13  | 0 | 0.000 | 145  | 75  | 0.339 |
| 147457 | 2 | 27310227  | 27310227  | C | T | SNP | <i>KHK</i>             | ENST00000260598 | 1  | splice_region               | c.92+8       | e1+8      | tier2 | 34  | 0 | 0.000 | 181  | 60  | 0.248 |
| 147457 | 2 | 27592008  | 27592008  | G | A | SNP | <i>EIF2B4</i>          | ENST00000347454 | -1 | missense                    | c.283        | p.R95W    | tier1 | 25  | 0 | 0.000 | 83   | 37  | 0.308 |
| 147457 | 2 | 27801023  | 27801023  | G | A | SNP | <i>C2orf16</i>         | ENST00000408964 | 1  | silent                      | c.1584       | p.T528    | tier1 | 120 | 0 | 0.000 | 263  | 94  | 0.263 |
| 147457 | 2 | 56403145  | 56403145  | C | T | SNP | <i>LOC100129434</i>    | ENST00000432793 | -1 | 5_prime_untranslated_region | c.-56403145  | NULL      | tier2 | 94  | 2 | 0.021 | 157  | 74  | 0.320 |
| 147457 | 2 | 58459235  | 58459235  | G | A | SNP | <i>FANCL</i>           | ENST00000233741 | -1 | missense                    | c.109        | p.H37Y    | tier1 | 61  | 1 | 0.016 | 143  | 63  | 0.306 |
| 147457 | 2 | 61331050  | 61331050  | G | A | SNP | <i>KIAA1841</i>        | ENST00000356719 | 1  | silent                      | c.1428       | p.P476    | tier1 | 97  | 1 | 0.010 | 244  | 104 | 0.298 |
| 147457 | 2 | 70504464  | 70504464  | C | T | SNP | <i>PCYOX1</i>          | ENST00000433351 | 1  | silent                      | c.1458       | p.N486    | tier1 | 35  | 1 | 0.028 | 95   | 45  | 0.321 |
| 147457 | 2 | 73829499  | 73829499  | C | T | SNP | <i>ALMS1</i>           | ENST00000264448 | 1  | splice_region               | c.12295+4    | e20+4     | tier2 | 26  | 0 | 0.000 | 164  | 65  | 0.283 |
| 147457 | 2 | 74173887  | 74173887  | G | A | SNP | <i>DGUOK</i>           | ENST00000264093 | 1  | missense                    | c.297        | p.M99I    | tier1 | 62  | 2 | 0.031 | 219  | 83  | 0.275 |
| 147457 | 2 | 74867224  | 74867224  | C | T | SNP | <i>C2orf65</i>         | ENST00000290536 | -1 | missense                    | c.179        | p.R60H    | tier1 | 58  | 3 | 0.049 | 178  | 62  | 0.257 |
| 147457 | 2 | 75158001  | 75158001  | C | T | SNP | <i>ENSG00000204792</i> | ENST00000377469 | 1  | rna                         | NULL         | NULL      | tier1 | 38  | 0 | 0.000 | 83   | 44  | 0.347 |
| 147457 | 2 | 91800800  | 91800800  | G | A | SNP | <i>ENSG00000233991</i> | ENST00000443031 | 1  | 3_prime_untranslated_region | c.*91800800  | NULL      | tier2 | 213 | 0 | 0.000 | 1207 | 71  | 0.056 |
| 147457 | 2 | 98732125  | 98732125  | G | A | SNP | <i>VWA3B</i>           | ENST00000451075 | 1  | missense                    | c.8          | p.R3H     | tier1 | 96  | 0 | 0.000 | 138  | 65  | 0.320 |
| 147457 | 2 | 99342686  | 99342686  | G | A | SNP | <i>MGAT4A</i>          | ENST00000495056 | -1 | 5_prime_untranslated_region | c.-99342686  | NULL      | tier2 | 121 | 1 | 0.008 | 232  | 101 | 0.303 |
| 147457 | 2 | 120397368 | 120397368 | C | T | SNP | <i>PCDP1</i>           | ENST00000443972 | 1  | missense                    | c.821        | p.P274L   | tier1 | 106 | 2 | 0.018 | 203  | 92  | 0.311 |
| 147457 | 2 | 131704217 | 131704217 | C | T | SNP | <i>ARHGEF4</i>         | ENST00000409359 | 1  | missense                    | c.3004       | p.R1002C  | tier1 | 32  | 0 | 0.000 | 168  | 60  | 0.263 |
| 147457 | 2 | 132384417 | 132384417 | G | A | SNP | <i>POTEKP</i>          | ENST00000397487 | 1  | 3_prime_untranslated_region | c.*132384417 | NULL      | tier3 | 49  | 1 | 0.020 | 374  | 145 | 0.279 |
| 147457 | 2 | 141459402 | 141459402 | G | A | SNP | <i>LRP1B</i>           | ENST00000389484 | -1 | silent                      | c.6315       | p.N2105   | tier1 | 142 | 0 | 0.000 | 385  | 144 | 0.272 |
| 147457 | 2 | 160983105 | 160983105 | G | A | SNP | <i>ITGB6</i>           | ENST00000283249 | -1 | silent                      | c.1668       | p.G556    | tier1 | 16  | 0 | 0.000 | 106  | 46  | 0.303 |
| 147457 | 2 | 170134318 | 170134318 | C | T | SNP | <i>LRP2</i>            | ENST00000263816 | -1 | missense                    | c.1709       | p.R570H   | tier1 | 94  | 0 | 0.000 | 185  | 76  | 0.290 |
| 147457 | 2 | 179613743 | 179613743 | C | T | SNP | <i>TTN</i>             | ENST00000360870 | -1 | missense                    | c.13384      | p.E4462K  | tier1 | 115 | 1 | 0.009 | 171  | 79  | 0.316 |
| 147457 | 2 | 198274685 | 198274685 | C | T | SNP | <i>SF3B1</i>           | ENST00000335508 | -1 | missense                    | c.713        | p.R238H   | tier1 | 88  | 3 | 0.033 | 603  | 239 | 0.284 |
| 147457 | 2 | 201619547 | 201619547 | C | T | SNP | <i>AOX2P</i>           | ENST00000470911 | 1  | 3_prime_untranslated_region | c.*201619547 | NULL      | tier3 | 128 | 1 | 0.008 | 200  | 84  | 0.296 |
| 147457 | 2 | 203948117 | 203948117 | G | A | SNP | <i>NBEAL1</i>          | ENST00000449802 | 1  | missense                    | c.860        | p.R287H   | tier1 | 83  | 0 | 0.000 | 199  | 89  | 0.309 |
| 147457 | 2 | 213886807 | 213886807 | G | A | SNP | <i>IKZF2</i>           | ENST00000434687 | -1 | missense                    | c.622        | p.R208C   | tier1 | 89  | 2 | 0.022 | 113  | 53  | 0.317 |
| 147457 | 2 | 215798769 | 215798769 | C | T | SNP | <i>ABCA12</i>          | ENST00000272895 | -1 | intronic                    | c.7680+33    | e52+33    | tier3 | 52  | 0 | 0.000 | 148  | 71  | 0.324 |
| 147457 | 2 | 216807787 | 216807787 | C | T | SNP | <i>MREG</i>            | ENST00000423087 | -1 | 3_prime_untranslated_region | c.*1799      | NULL      | tier3 | 167 | 3 | 0.018 | 255  | 105 | 0.291 |
| 147457 | 2 | 218938006 | 218938006 | G | T | SNP | <i>RUFY4</i>           | ENST00000374155 | 1  | missense                    | c.427        | p.R143C   | tier1 | 99  | 1 | 0.010 | 355  | 138 | 0.279 |
| 147457 | 2 | 219538351 | 219538351 | C | A | SNP | <i>STK36</i>           | ENST00000295709 | 1  | missense                    | c.88         | p.V30M    | tier1 | 62  | 0 | 0.000 | 138  | 53  | 0.275 |
| 147457 | 2 | 219544699 | 219544699 | C | T | SNP | <i>STK36</i>           | ENST00000295709 | 1  | silent                      | c.1032       | p.L344    | tier1 | 29  | 0 | 0.000 | 119  | 68  | 0.364 |
| 147457 | 2 | 220312930 | 220312930 | G | T | SNP | <i>SPEG</i>            | ENST00000312358 | 1  | silent                      | c.1050       | p.T350    | tier1 | 179 | 1 | 0.006 | 726  | 274 | 0.274 |
| 147457 | 2 | 226447163 | 226447163 | C | A | SNP | <i>NYAP2</i>           | ENST00000272907 | 1  | missense                    | c.1030       | p.V344M   | tier1 | 25  | 0 | 0.000 | 98   | 31  | 0.223 |
| 147457 | 2 | 226447731 | 226447731 | G | A | SNP | <i>NYAP2</i>           | ENST00000272907 | 1  | missense                    | c.1598       | p.R533H   | tier1 | 16  | 0 | 0.000 | 174  | 96  | 0.356 |
| 147457 | 2 | 227872842 | 227872842 | C | T | SNP | <i>COL4A4</i>          | ENST00000396625 | -1 | silent                      | c.4701       | p.A1567   | tier1 | 17  | 0 | 0.000 | 219  | 81  | 0.270 |
| 147457 | 2 | 227915822 | 227915822 | G | A | SNP | <i>COL4A4</i>          | ENST00000396625 | -1 | silent                      | c.3021       | p.Y1007   | tier1 | 59  | 1 | 0.017 | 169  | 100 | 0.372 |
| 147457 | 2 | 231307770 | 231307770 | G | A | SNP | <i>SP100</i>           | ENST00000340126 | 1  | missense                    | c.226        | p.E76K    | tier1 | 132 | 1 | 0.008 | 204  | 92  | 0.311 |
| 147457 | 2 | 238245159 | 238245159 | C | T | SNP | <i>COL6A3</i>          | ENST00000295550 | -1 | missense                    | c.8584       | p.V2862I  | tier1 | 218 | 4 | 0.018 | 291  | 115 | 0.283 |
| 147457 | 2 | 238461018 | 238461018 | C | T | SNP | <i>MLPH</i>            | ENST00000264605 | 1  | nonsense                    | c.1714       | p.R572*   | tier1 | 89  | 0 | 0.000 | 194  | 81  | 0.295 |
| 147457 | 2 | 241517127 | 241517127 | C | T | SNP | <i>RNPEPL1</i>         | ENST00000270357 | 1  | missense                    | c.1303       | p.R435C   | tier1 | 25  | 0 | 0.000 | 297  | 125 | 0.296 |
| 147457 | 3 | 3137142   | 3137142   | C | T | SNP | <i>IL5RA</i>           | ENST00000256452 | -1 | intronic                    | c.710-14     | e6-14     | tier3 | 55  | 0 | 0.000 | 105  | 34  | 0.245 |
| 147457 | 3 | 9768381   | 9768381   | C | T | SNP | <i>CPNE9</i>           | ENST00000273027 | 1  | missense                    | c.572        | p.S191L   | tier1 | 59  | 0 | 0.000 | 144  | 70  | 0.326 |
| 147457 | 3 | 11468460  | 11468460  | C | T | SNP | <i>ATG7</i>            | ENST00000354449 | 1  | intronic                    | c.2079+60    | e17+60    | tier3 | 128 | 0 | 0.000 | 191  | 91  | 0.323 |
| 147457 | 3 | 11487941  | 11487941  | G | A | SNP | <i>ATG7</i>            | ENST00000354449 | 1  | intronic                    | c.2079+19541 | e17+19541 | tier3 | 127 | 0 | 0.000 | 202  | 72  | 0.263 |
| 147457 | 3 | 13916529  | 13916529  | G | A | SNP | <i>WNT7A</i>           | ENST00000285018 | -1 | silent                      | c.213        | p.D71     | tier1 | 35  | 0 | 0.000 | 94   | 48  | 0.338 |
| 147457 | 3 | 14552987  | 14552987  | G | A | SNP | <i>GRIP2</i>           | ENST00000273083 | -1 | 5_prime_untranslated_region | c.-14552987  | NULL      | tier3 | 28  | 0 | 0.000 | 132  | 67  | 0.335 |
| 147457 | 3 | 14862667  | 14862667  | C | T | SNP | <i>FGD5</i>            | ENST00000285046 | 1  | missense                    | c.2089       | p.R697W   | tier1 | 81  | 1 | 0.012 | 245  | 127 | 0.341 |
| 147457 | 3 | 16269593  | 16269593  | C | T | SNP | <i>GALNTL2</i>         | ENST00000339732 | 1  | 3_prime_untranslated_region | c.*586       | NULL      | tier3 | 60  | 0 | 0.000 | 123  | 45  | 0.268 |
| 147457 | 3 | 24231711  | 24231711  | G | T | SNP | <i>THRB</i>            | ENST00000356447 | -1 | missense                    | c.137        | p.R46H    | tier1 | 70  | 2 | 0.028 | 100  | 44  | 0.306 |
| 147457 | 3 | 32811381  | 32811381  | C | A | SNP | <i>CNOT10</i>          | ENST00000454516 | 1  | silent                      | c.2187       | p.A729    | tier1 | 140 | 4 | 0.028 | 223  | 101 | 0.310 |
| 147457 | 3 | 46450139  | 46450139  | C | T | SNP | <i>CCRL2</i>           | ENST00000357392 | 1  | missense                    | c.605        | p.P202L   | tier1 | 65  | 1 | 0.015 | 176  | 61  | 0.256 |
| 147457 | 3 | 48266702  | 48266702  | G | T | SNP | <i>CAMP</i>            | ENST00000296435 | 1  | intronic                    | c.391-81     | e4-81     | tier2 | 70  | 0 | 0.000 | 266  | 111 | 0.291 |
| 147457 | 3 | 48694445  | 48694445  | C | A | SNP | <i>CELSR3</i>          | ENST00000544264 | -1 | missense                    | c.4085       | p.A1362V  | tier1 | 136 | 1 | 0.007 | 553  | 227 | 0.290 |
| 147457 | 3 | 49455325  | 49455325  | C | T | SNP | <i>AMT</i>             | ENST00000273588 | -1 | missense                    | c.959        | p.R320H   | tier1 | 20  | 0 | 0.000 | 149  | 60  | 0.287 |
| 147457 | 3 | 52559275  | 52559275  | G | A | SNP | <i>NT5DC2</i>          | ENST00000422318 | -1 | missense                    | c.1156       | p.R386C   | tier1 | 27  | 0 | 0.000 | 126  | 40  | 0.241 |
| 147457 | 3 | 68781240  | 68781240  | C | T | SNP | <i>FAM19A4</i>         | ENST00000295569 | -1 | 3_prime_untranslated_region | c.*1053      | NULL      | tier3 | 47  | 0 | 0.000 | 88   | 38  | 0.302 |
| 147457 | 3 | 69987598  | 69987598  | C | T | SNP | <i>MITF</i>            | ENST00000394348 | 1  | 3_prime_untranslated_region | c.*69987598  | NULL      | tier3 | 133 | 1 | 0.008 | 290  | 82  | 0.220 |
| 147457 | 3 | 70014355  | 70014355  | C | T | SNP | <i>MITF</i>            | ENST00000448226 | 1  | missense                    | c.1537       | p.R513W   | tier1 | 26  | 0 | 0.000 | 71   | 25  | 0.260 |
| 147457 | 3 | 101050880 | 101050880 | C | T | SNP | <i>SENP7</i>           | ENST00000394095 | -1 | missense                    | c.2647       | p.V883I   | tier1 | 163 | 0 | 0.000 | 270  | 106 | 0.282 |
| 147457 | 3 | 101308992 | 101308992 | G | A | SNP | <i>PCNP</i>            | ENST00000465366 | 1  | 3_prime_untranslated_region | c.*101308992 | NULL      | tier3 | 123 | 2 | 0.016 | 147  | 53  | 0.265 |
| 147457 | 3 | 112991437 | 112991437 | A | G | SNP | <i>BOC</i>             | ENST00000273395 | 1  | missense                    | c.848        | p.N283S   | tier1 | 9   | 0 | 0.000 | 80   | 88  | 0.524 |
| 147457 | 3 | 122329604 | 122329604 | G | A | SNP | <i>PARP15</i>          | ENST00000464300 | 1  | intronic                    | c.543+27     | e3+27     | tier3 | 51  | 0 | 0.000 | 156  |     |       |

|        |   |           |           |   |   |     |                        |                 |    |                             |              |           |       |     |   |       |      |     |       |
|--------|---|-----------|-----------|---|---|-----|------------------------|-----------------|----|-----------------------------|--------------|-----------|-------|-----|---|-------|------|-----|-------|
| 147457 | 3 | 194081495 | 194081495 | G | A | SNP | <i>LRRC15</i>          | ENST00000439944 | -1 | missense                    | c.296        | p.T99M    | tier1 | 22  | 0 | 0.000 | 99   | 39  | 0.281 |
| 147457 | 3 | 195509143 | 195509143 | G | A | SNP | <i>MUC4</i>            | ENST00000463781 | -1 | missense                    | c.9308       | p.T3103M  | tier1 | 226 | 2 | 0.009 | 1333 | 87  | 0.061 |
| 147457 | 3 | 196387275 | 196387275 | C | T | SNP | <i>LRRC33</i>          | ENST00000328557 | 1  | missense                    | c.761        | p.T254M   | tier1 | 17  | 0 | 0.000 | 147  | 74  | 0.335 |
| 147457 | 3 | 196751232 | 196751232 | G | A | SNP | <i>MF12</i>            | ENST00000296350 | -1 | silent                      | c.429        | p.P143    | tier1 | 24  | 0 | 0.000 | 175  | 81  | 0.316 |
| 147457 | 4 | 1332229   | 1332229   | G | A | SNP | <i>MAEA</i>            | ENST00000303400 | 1  | missense                    | c.919        | p.G307S   | tier1 | 33  | 0 | 0.000 | 274  | 120 | 0.305 |
| 147457 | 4 | 2941321   | 2941321   | G | A | SNP | <i>NOP14</i>           | ENST00000416614 | -1 | missense                    | c.2251       | p.R751W   | tier1 | 18  | 0 | 0.000 | 116  | 57  | 0.330 |
| 147457 | 4 | 4317442   | 4317442   | C | T | SNP | <i>ZBTB49</i>          | ENST00000337872 | 1  | nonsense                    | c.1456       | p.R486*   | tier1 | 73  | 0 | 0.000 | 124  | 67  | 0.349 |
| 147457 | 4 | 8304175   | 8304175   | G | A | SNP | <i>HTRA3</i>           | ENST00000307358 | 1  | intronic                    | c.1052-15    | e7-15     | tier3 | 30  | 0 | 0.000 | 93   | 44  | 0.319 |
| 147457 | 4 | 9828063   | 9828063   | G | A | SNP | <i>SLC2A9</i>          | ENST00000264784 | -1 | silent                      | c.1581       | p.L527    | tier1 | 91  | 1 | 0.011 | 131  | 54  | 0.292 |
| 147457 | 4 | 15691400  | 15691400  | G | A | SNP | <i>FAM200B</i>         | ENST00000504137 | 1  | 3_prime_untranslated_region | c.*15691400  | NULL      | tier4 | 99  | 2 | 0.020 | 172  | 73  | 0.298 |
| 147457 | 4 | 17868743  | 17868743  | C | T | SNP | <i>LCORL</i>           | ENST00000326877 | -1 | intronic                    | c.776+18948  | e6+18948  | tier3 | 44  | 0 | 0.000 | 103  | 44  | 0.299 |
| 147457 | 4 | 42509034  | 42509034  | G | A | SNP | <i>ATP8A1</i>          | ENST00000381668 | -1 | silent                      | c.2085       | p.I695    | tier1 | 135 | 0 | 0.000 | 193  | 66  | 0.255 |
| 147457 | 4 | 44177057  | 44177057  | C | T | SNP | <i>KCTD8</i>           | ENST00000360029 | -1 | missense                    | c.1172       | p.R391H   | tier1 | 197 | 3 | 0.015 | 247  | 91  | 0.268 |
| 147457 | 4 | 48165752  | 48165752  | G | A | SNP | <i>TEC</i>             | ENST00000381501 | -1 | missense                    | c.704        | p.T235M   | tier1 | 113 | 3 | 0.026 | 238  | 85  | 0.262 |
| 147457 | 4 | 57384937  | 57384937  | G | A | SNP | <i>ARL9</i>            | ENST00000360096 | 1  | missense                    | c.302        | p.R101Q   | tier1 | 146 | 0 | 0.000 | 233  | 87  | 0.271 |
| 147457 | 4 | 69048233  | 69048233  | C | T | SNP | <i>FTLP10</i>          | ENST00000503647 | 1  | 3_prime_untranslated_region | c.*69048233  | NULL      | tier3 | 48  | 0 | 0.000 | 281  | 115 | 0.290 |
| 147457 | 4 | 71099798  | 71099798  | G | A | SNP | <i>FDCSP</i>           | ENST00000317987 | 1  | missense                    | c.152        | p.R51H    | tier1 | 190 | 1 | 0.005 | 161  | 55  | 0.255 |
| 147457 | 4 | 85758110  | 85758110  | C | T | SNP | <i>WDFY3</i>           | ENST00000295888 | -1 | missense                    | c.548        | p.R183Q   | tier1 | 136 | 3 | 0.022 | 255  | 124 | 0.326 |
| 147457 | 4 | 88293939  | 88293939  | G | A | SNP | <i>HSD17B11</i>        | ENST00000358290 | -1 | missense                    | c.479        | p.T160M   | tier1 | 195 | 2 | 0.010 | 302  | 110 | 0.267 |
| 147457 | 4 | 119461591 | 119461591 | G | A | SNP | <i>CEP170P1</i>        | ENST00000412784 | 1  | intronic                    | c.NULL       | NULL      | tier3 | 52  | 1 | 0.019 | 88   | 48  | 0.353 |
| 147457 | 4 | 122846298 | 122846298 | G | A | SNP | <i>TRPC3</i>           | ENST00000379645 | -1 | nonsense                    | c.1051       | p.R351*   | tier1 | 74  | 0 | 0.000 | 103  | 64  | 0.383 |
| 147457 | 4 | 162421108 | 162421108 | C | T | SNP | <i>FSTL5</i>           | ENST00000306100 | -1 | intronic                    | c.1458+60    | e11+60    | tier3 | 161 | 0 | 0.000 | 184  | 84  | 0.313 |
| 147457 | 4 | 166009582 | 166009582 | C | T | SNP | <i>TMEM192</i>         | ENST00000306480 | -1 | intronic                    | c.574+38     | e4+38     | tier3 | 111 | 2 | 0.018 | 184  | 85  | 0.316 |
| 147457 | 4 | 187630302 | 187630302 | C | T | SNP | <i>FAT1</i>            | ENST00000260147 | -1 | missense                    | c.680        | p.R227H   | tier1 | 34  | 0 | 0.000 | 104  | 59  | 0.362 |
| 147457 | 4 | 189026057 | 189026057 | C | T | SNP | <i>TRIML2</i>          | ENST00000512729 | -1 | silent                      | c.69         | p.S23     | tier1 | 112 | 0 | 0.000 | 127  | 61  | 0.323 |
| 147457 | 5 | 770160    | 770160    | C | T | SNP | <i>ZDHHC11</i>         | ENST00000424784 | -1 | intronic                    | c.1239+25854 | e12+25854 | tier3 | 87  | 0 | 0.000 | 705  | 123 | 0.148 |
| 147457 | 5 | 1293693   | 1293693   | C | T | SNP | <i>TERT</i>            | ENST00000310581 | -1 | silent                      | c.1308       | p.A436    | tier1 | 126 | 0 | 0.000 | 750  | 334 | 0.307 |
| 147457 | 5 | 1338034   | 1338034   | G | A | SNP | <i>CLPTM1L</i>         | ENST00000320895 | -1 | silent                      | c.663        | p.R221    | tier1 | 31  | 0 | 0.000 | 118  | 45  | 0.276 |
| 147457 | 5 | 1483662   | 1483662   | G | A | SNP | <i>LPCAT1</i>          | ENST00000283415 | -1 | intronic                    | c.668-61     | e6-61     | tier3 | 48  | 0 | 0.000 | 233  | 74  | 0.240 |
| 147457 | 5 | 5463371   | 5463371   | G | A | SNP | <i>KIAA0947</i>        | ENST00000296564 | 1  | silent                      | c.3924       | p.T1308   | tier1 | 31  | 0 | 0.000 | 80   | 31  | 0.279 |
| 147457 | 5 | 6602599   | 6602599   | C | T | SNP | <i>NSUN2</i>           | ENST00000264670 | -1 | missense                    | c.1972       | p.V658M   | tier1 | 84  | 3 | 0.035 | 162  | 86  | 0.347 |
| 147457 | 5 | 13762777  | 13762777  | C | T | SNP | <i>DNAH5</i>           | ENST00000265104 | -1 | intronic                    | c.10281+54   | e60+54    | tier3 | 76  | 1 | 0.013 | 294  | 135 | 0.315 |
| 147457 | 5 | 13931209  | 13931209  | C | T | SNP | <i>DNAH5</i>           | ENST00000265104 | -1 | splice_region               | c.192+10     | e2+10     | tier3 | 223 | 0 | 0.000 | 660  | 28  | 0.041 |
| 147457 | 5 | 31995780  | 31995780  | C | T | SNP | <i>PDZD2</i>           | ENST00000282493 | 1  | silent                      | c.1077       | p.H359    | tier1 | 77  | 3 | 0.038 | 236  | 104 | 0.304 |
| 147457 | 5 | 34190535  | 34190535  | C | T | SNP | <i>ENSG00000215156</i> | ENST00000332686 | 1  | 3_prime_untranslated_region | c.*34190535  | NULL      | tier3 | 636 | 6 | 0.009 | 4301 | 196 | 0.043 |
| 147457 | 5 | 35910093  | 35910093  | C | T | SNP | <i>CAPSL</i>           | ENST00000397366 | -1 | missense                    | c.400        | p.E134K   | tier1 | 155 | 4 | 0.025 | 236  | 74  | 0.239 |
| 147457 | 5 | 41149449  | 41149449  | G | A | SNP | <i>C6</i>              | ENST00000263413 | -1 | silent                      | c.2517       | p.D839    | tier1 | 106 | 2 | 0.019 | 133  | 46  | 0.257 |
| 147457 | 5 | 79646877  | 79646877  | C | T | SNP | <i>CRSP8P</i>          | ENST00000514280 | -1 | 5_prime_untranslated_region | c.-79646877  | NULL      | tier3 | 107 | 1 | 0.009 | 498  | 173 | 0.257 |
| 147457 | 5 | 129521471 | 129521471 | G | A | SNP | <i>CHSY3</i>           | ENST00000305031 | 1  | missense                    | c.2636       | p.R879Q   | tier1 | 28  | 0 | 0.000 | 92   | 47  | 0.338 |
| 147457 | 5 | 140221632 | 140221632 | C | T | SNP | <i>PCDHAC1</i>         | ENST00000531613 | 1  | silent                      | c.726        | p.F242    | tier1 | 316 | 1 | 0.003 | 877  | 53  | 0.057 |
| 147457 | 5 | 140308059 | 140308059 | C | T | SNP | <i>PCDHAC1</i>         | ENST00000253807 | 1  | missense                    | c.1582       | p.R528W   | tier1 | 57  | 0 | 0.000 | 180  | 69  | 0.277 |
| 147457 | 5 | 140720521 | 140720521 | C | T | SNP | <i>PCDHGA2</i>         | ENST00000394576 | 1  | silent                      | c.1983       | p.T661    | tier1 | 42  | 0 | 0.000 | 432  | 199 | 0.315 |
| 147457 | 5 | 140751057 | 140751057 | G | A | SNP | <i>PCDHGB3</i>         | ENST00000576222 | 1  | missense                    | c.1096       | p.V366I   | tier1 | 78  | 2 | 0.025 | 189  | 70  | 0.270 |
| 147457 | 5 | 145610359 | 145610359 | C | T | SNP | <i>RBM27</i>           | ENST00000265271 | 1  | silent                      | c.729        | p.I243    | tier1 | 93  | 0 | 0.000 | 159  | 66  | 0.293 |
| 147457 | 5 | 146236055 | 146236055 | C | T | SNP | <i>PPP2R2B</i>         | ENST00000394410 | -1 | splice_region               | c.37+7       | e1+7      | tier3 | 110 | 1 | 0.009 | 147  | 69  | 0.319 |
| 147457 | 5 | 147929769 | 147929769 | G | A | SNP | <i>HTR4</i>            | ENST00000360693 | -1 | missense                    | c.83         | p.T28M    | tier1 | 69  | 0 | 0.000 | 217  | 79  | 0.267 |
| 147457 | 5 | 149584221 | 149584221 | C | T | SNP | <i>SLC6A7</i>          | ENST00000230671 | 1  | intronic                    | c.1432+27    | e11+27    | tier3 | 17  | 0 | 0.000 | 142  | 62  | 0.304 |
| 147457 | 5 | 153434852 | 153434852 | C | T | SNP | <i>MFAP3</i>           | ENST00000436816 | 1  | 3_prime_untranslated_region | c.*1579      | NULL      | tier3 | 89  | 0 | 0.000 | 119  | 44  | 0.270 |
| 147457 | 5 | 159665575 | 159665575 | G | A | SNP | <i>FABP6</i>           | ENST00000393980 | 1  | intronic                    | c.481-38     | e6-38     | tier3 | 45  | 0 | 0.000 | 143  | 49  | 0.253 |
| 147457 | 5 | 173534383 | 173534383 | C | T | SNP | <i>HMP19</i>           | ENST00000303177 | 1  | missense                    | c.391        | p.R131C   | tier1 | 75  | 2 | 0.026 | 253  | 117 | 0.316 |
| 147457 | 5 | 175915965 | 175915965 | G | A | SNP | <i>FAF2</i>            | ENST00000261942 | 1  | nonsense                    | c.281        | p.W94*    | tier1 | 100 | 4 | 0.039 | 155  | 52  | 0.251 |
| 147457 | 5 | 176308809 | 176308809 | G | A | SNP | <i>HK3</i>             | ENST00000292432 | -1 | silent                      | c.2277       | p.I759    | tier1 | 38  | 0 | 0.000 | 172  | 91  | 0.346 |
| 147457 | 5 | 178359183 | 178359183 | G | A | SNP | <i>ZFP2</i>            | ENST00000361362 | 1  | missense                    | c.869        | p.R290Q   | tier1 | 73  | 0 | 0.000 | 184  | 71  | 0.278 |
| 147457 | 6 | 3127540   | 3127540   | C | T | SNP | <i>BPHL</i>            | ENST00000380379 | 1  | silent                      | c.276        | p.V92     | tier1 | 78  | 2 | 0.025 | 138  | 80  | 0.365 |
| 147457 | 6 | 25727357  | 25727357  | G | A | SNP | <i>HIST1H2BA</i>       | ENST00000274764 | 1  | missense                    | c.221        | p.R74H    | tier1 | 39  | 2 | 0.049 | 98   | 41  | 0.295 |
| 147457 | 6 | 27217008  | 27217008  | C | T | SNP | <i>PRSS16</i>          | ENST00000230582 | 1  | missense                    | c.467        | p.A156V   | tier1 | 54  | 1 | 0.018 | 115  | 46  | 0.286 |
| 147457 | 6 | 31555086  | 31555086  | C | T | SNP | <i>LST1</i>            | ENST00000396117 | 1  | missense                    | c.10         | p.R4W     | tier1 | 59  | 0 | 0.000 | 173  | 80  | 0.314 |
| 147457 | 6 | 31913016  | 31913016  | G | A | SNP | <i>C2</i>              | ENST00000299367 | 1  | missense                    | c.2141       | p.R714H   | tier1 | 94  | 1 | 0.011 | 272  | 126 | 0.314 |
| 147457 | 6 | 33554497  | 33554497  | C | T | SNP | <i>GGNBP1</i>          | ENST00000374458 | 1  | missense                    | c.148        | p.R50C    | tier1 | 28  | 0 | 0.000 | 175  | 73  | 0.294 |
| 147457 | 6 | 33990389  | 33990389  | C | T | SNP | <i>GRM4</i>            | ENST00000374181 | -1 | 3_prime_untranslated_region | c.*209       | NULL      | tier3 | 14  | 0 | 0.000 | 79   | 44  | 0.358 |
| 147457 | 6 | 42985429  | 42985429  | C | T | SNP | <i>KLHDC3</i>          | ENST00000244670 | 1  | missense                    | c.41         | p.T14M    | tier1 | 58  | 1 | 0.017 | 162  | 94  | 0.367 |
| 147457 | 6 | 52522264  | 52522264  | C | T | SNP | <i>TMEM14A</i>         | ENST00000211314 | 1  | 5_prime_flanking_region     | c.-19637     | NULL      | tier3 | 35  | 0 | 0.000 | 147  | 70  | 0.320 |
| 147457 | 6 | 55270421  | 55270421  | G | A | SNP | <i>GFRAL</i>           | ENST00000340465 | 1  | 3_prime_flanking_region     | c.*3770      | NULL      | tier3 | 104 | 2 | 0.019 | 164  | 102 | 0.382 |
| 147457 | 6 | 56919602  | 56919602  | C | T | SNP | <i>KIAA1586</i>        | ENST00000370733 | 1  | missense                    | c.2305       | p.R769W   | tier1 | 195 | 6 | 0.030 | 301  | 129 | 0.300 |
| 147457 | 6 | 75831004  | 75831004  | G | A | SNP | <i>COL12A1</i>         | ENST00000322507 | -1 | intronic                    | c.7086+14    | e43+14    | tier3 | 201 | 0 | 0.000 | 682  | 28  | 0.039 |
| 147457 | 6 | 105726111 | 105726111 | C | T | SNP | <i>PREP</i>            | ENST00000369110 | -1 | missense                    | c.2041       | p.G681R   | tier1 | 18  | 0 | 0.000 | 105  | 41  | 0.281 |
| 147457 | 6 | 108985689 | 108985689 | G | A | SNP | <i>FOXO3</i>           | ENST00000343882 | 1  | silent                      | c.1653       | p.S551    | tier1 | 19  | 0 | 0.000 | 131  | 70  | 0.348 |
| 147457 | 6 | 1367      |           |   |   |     |                        |                 |    |                             |              |           |       |     |   |       |      |     |       |

|        |   |           |           |   |   |     |                 |                 |    |                             |              |          |       |     |   |       |      |     |       |
|--------|---|-----------|-----------|---|---|-----|-----------------|-----------------|----|-----------------------------|--------------|----------|-------|-----|---|-------|------|-----|-------|
| 147457 | 7 | 2474107   | 2474107   | C | T | SNP | CHST12          | ENST00000258711 | 1  | 3_prime_untranslated_region | c.*588       | NULL     | tier4 | 56  | 1 | 0.018 | 90   | 34  | 0.270 |
| 147457 | 7 | 6005211   | 6005211   | C | T | SNP | RSPH10B         | ENST00000337579 | -1 | intronic                    | c.330+57     | e2+57    | tier3 | 15  | 0 | 0.000 | 59   | 32  | 0.352 |
| 147457 | 7 | 20762660  | 20762660  | G | A | SNP | ABCB5           | ENST00000258738 | 1  | missense                    | c.1108       | p.V370I  | tier1 | 103 | 0 | 0.000 | 110  | 51  | 0.317 |
| 147457 | 7 | 21906048  | 21906048  | C | T | SNP | DNAH11          | ENST00000328843 | 1  | intronic                    | c.11518-40   | e72-40   | tier3 | 47  | 0 | 0.000 | 124  | 39  | 0.239 |
| 147457 | 7 | 42005169  | 42005169  | C | T | SNP | GLI3            | ENST00000395925 | -1 | missense                    | c.3502       | p.G1168R | tier1 | 54  | 1 | 0.018 | 334  | 108 | 0.244 |
| 147457 | 7 | 45813153  | 45813153  | C | T | SNP | ENSG00000212450 | ENST00000391148 | 1  | 5_prime_flanking_region     | c.-16031     | NULL     | tier3 | 879 | 4 | 0.005 | 1789 | 86  | 0.046 |
| 147457 | 7 | 48139220  | 48139220  | C | T | SNP | UPP1            | ENST00000331803 | 1  | intronic                    | c.45-47      | e2-47    | tier3 | 101 | 0 | 0.000 | 156  | 49  | 0.238 |
| 147457 | 7 | 51454298  | 51454298  | G | A | SNP | ENSG00000228897 | ENST00000444843 | -1 | 5_prime_untranslated_region | c.-51454298  | NULL     | tier3 | 67  | 1 | 0.015 | 812  | 282 | 0.257 |
| 147457 | 7 | 75609676  | 75609676  | C | T | SNP | POR             | ENST00000461988 | 1  | missense                    | c.386        | p.P129L  | tier1 | 20  | 0 | 0.000 | 110  | 40  | 0.265 |
| 147457 | 7 | 76610187  | 76610187  | G | A | SNP | ENSG00000186704 | ENST00000425797 | 1  | 3_prime_untranslated_region | c.*76610187  | NULL     | tier3 | 58  | 0 | 0.000 | 346  | 137 | 0.283 |
| 147457 | 7 | 92855290  | 92855290  | C | T | SNP | HEPACAM2        | ENST00000394468 | -1 | intronic                    | c.79+391     | e1+391   | tier3 | 59  | 0 | 0.000 | 69   | 34  | 0.330 |
| 147457 | 7 | 94293941  | 94293941  | G | A | SNP | PEG10           | ENST00000482108 | 1  | 3_prime_untranslated_region | c.*95        | NULL     | tier3 | 44  | 2 | 0.044 | 131  | 49  | 0.271 |
| 147457 | 7 | 97872988  | 97872988  | C | T | SNP | TECPR1          | ENST00000379795 | -1 | intronic                    | c.532-84     | e4-84    | tier3 | 20  | 0 | 0.000 | 172  | 60  | 0.259 |
| 147457 | 7 | 97920701  | 97920701  | G | A | SNP | BRI3            | ENST00000297290 | 1  | 3_prime_untranslated_region | c.*146       | NULL     | tier3 | 39  | 0 | 0.000 | 99   | 38  | 0.277 |
| 147457 | 7 | 98258817  | 98258817  | G | A | SNP | NPTX2           | ENST00000265634 | 1  | 3_prime_untranslated_region | c.*876       | NULL     | tier3 | 149 | 0 | 0.000 | 211  | 73  | 0.257 |
| 147457 | 7 | 100730606 | 100730606 | G | A | SNP | TRIM56          | ENST00000306085 | 1  | missense                    | c.13         | p.G5R    | tier1 | 25  | 0 | 0.000 | 176  | 70  | 0.282 |
| 147457 | 7 | 105662648 | 105662648 | C | T | SNP | CDHR3           | ENST00000468477 | 1  | missense                    | c.236        | p.T79M   | tier1 | 105 | 1 | 0.009 | 216  | 90  | 0.292 |
| 147457 | 7 | 123594538 | 123594538 | G | A | SNP | SPAM1           | ENST00000340011 | 1  | missense                    | c.914        | p.R305H  | tier1 | 98  | 0 | 0.000 | 103  | 43  | 0.295 |
| 147457 | 7 | 133894966 | 133894966 | C | T | SNP | LRGUK           | ENST00000285928 | 1  | intronic                    | c.1843+8638  | e15+8638 | tier3 | 12  | 0 | 0.000 | 126  | 77  | 0.379 |
| 147457 | 7 | 134632353 | 134632353 | C | T | SNP | CALD1           | ENST00000361388 | 1  | missense                    | c.940        | p.R314C  | tier1 | 46  | 0 | 0.000 | 313  | 129 | 0.291 |
| 147457 | 7 | 138522637 | 138522637 | C | T | SNP | TMEM213         | ENST00000413208 | 1  | nonsense                    | c.178        | p.R60*   | tier1 | 44  | 0 | 0.000 | 87   | 61  | 0.412 |
| 147457 | 7 | 139801866 | 139801866 | C | T | SNP | JHDM1D          | ENST00000397560 | -1 | missense                    | c.1523       | p.R508Q  | tier1 | 202 | 1 | 0.005 | 197  | 83  | 0.296 |
| 147457 | 7 | 140156546 | 140156546 | G | A | SNP | MKRN1           | ENST00000255977 | -1 | missense                    | c.892        | p.R298C  | tier1 | 46  | 0 | 0.000 | 134  | 69  | 0.340 |
| 147457 | 7 | 143010124 | 143010124 | C | T | SNP | HINT1P1         | ENST00000464866 | -1 | 5_prime_untranslated_region | c.-143010124 | NULL     | tier3 | 36  | 0 | 0.000 | 79   | 33  | 0.295 |
| 147457 | 7 | 150772740 | 150772740 | G | A | SNP | SLC4A2          | ENST00000413384 | 1  | missense                    | c.3349       | p.V1117M | tier1 | 18  | 0 | 0.000 | 125  | 66  | 0.346 |
| 147457 | 7 | 150939682 | 150939682 | C | T | SNP | SMARCD3         | ENST00000262188 | -1 | missense                    | c.464        | p.R155Q  | tier1 | 32  | 0 | 0.000 | 150  | 65  | 0.302 |
| 147457 | 8 | 8185940   | 8185940   | G | A | SNP | SGK223          | ENST00000330777 | -1 | silent                      | c.2352       | p.S784   | tier1 | 36  | 0 | 0.000 | 154  | 78  | 0.336 |
| 147457 | 8 | 8235576   | 8235576   | G | A | SNP | SGK223          | ENST00000330777 | -1 | nonsense                    | c.343        | p.R115*  | tier1 | 153 | 2 | 0.013 | 363  | 141 | 0.279 |
| 147457 | 8 | 10464473  | 10464473  | C | T | SNP | RP1L1           | ENST00000382483 | -1 | missense                    | c.7135       | p.G2379R | tier1 | 36  | 0 | 0.000 | 103  | 55  | 0.346 |
| 147457 | 8 | 11223131  | 11223131  | G | A | SNP | TDH             | ENST00000525246 | 1  | 3_prime_untranslated_region | c.*11223131  | NULL     | tier3 | 77  | 1 | 0.013 | 160  | 72  | 0.310 |
| 147457 | 8 | 12232826  | 12232826  | G | A | SNP | ENSG00000254423 | ENST00000532111 | -1 | 5_prime_untranslated_region | c.-12232826  | NULL     | tier3 | 89  | 1 | 0.011 | 587  | 139 | 0.192 |
| 147457 | 8 | 21927047  | 21927047  | G | A | SNP | EPB49           | ENST00000381455 | 1  | intronic                    | c.211+18     | e3+18    | tier3 | 21  | 0 | 0.000 | 160  | 75  | 0.319 |
| 147457 | 8 | 27094400  | 27094400  | C | T | SNP | STMN4           | ENST00000350889 | -1 | missense                    | c.614        | p.R205Q  | tier1 | 41  | 0 | 0.000 | 105  | 47  | 0.309 |
| 147457 | 8 | 32505766  | 32505766  | G | A | SNP | NRG1            | ENST00000520502 | 1  | missense                    | c.530        | p.R177H  | tier1 | 91  | 0 | 0.000 | 197  | 92  | 0.317 |
| 147457 | 8 | 38109809  | 38109809  | A | C | SNP | DDHD2           | ENST00000397166 | 1  | splice_region               | c.1617+4     | e12+4    | tier3 | 121 | 1 | 0.008 | 158  | 58  | 0.267 |
| 147457 | 8 | 41791093  | 41791093  | C | T | SNP | KAT6A           | ENST00000265713 | -1 | missense                    | c.4645       | p.G1549S | tier1 | 33  | 1 | 0.029 | 139  | 58  | 0.294 |
| 147457 | 8 | 48955608  | 48955608  | G | A | SNP | UBE2V2          | ENST00000523111 | 1  | missense                    | c.32         | p.R11H   | tier1 | 243 | 1 | 0.004 | 282  | 91  | 0.244 |
| 147457 | 8 | 61192308  | 61192308  | G | A | SNP | CA8             | ENST00000317995 | -1 | nonsense                    | c.232        | p.R78*   | tier1 | 78  | 0 | 0.000 | 158  | 57  | 0.265 |
| 147457 | 8 | 88249205  | 88249205  | C | T | SNP | CNBD1           | ENST00000518476 | 1  | silent                      | c.636        | p.N212   | tier1 | 105 | 2 | 0.019 | 158  | 81  | 0.339 |
| 147457 | 8 | 92998437  | 92998437  | G | A | SNP | RUNX1T1         | ENST00000521751 | -1 | missense                    | c.293        | p.T98M   | tier1 | 226 | 0 | 0.000 | 684  | 26  | 0.037 |
| 147457 | 8 | 125592809 | 125592809 | G | A | SNP | MTSS1           | ENST00000325064 | -1 | splice_region               | c.461-6      | e7-6     | tier3 | 56  | 0 | 0.000 | 180  | 92  | 0.338 |
| 147457 | 8 | 128753030 | 128753030 | G | A | SNP | MYC             | ENST00000377970 | 1  | silent                      | c.1191       | p.P397   | tier1 | 50  | 1 | 0.020 | 140  | 47  | 0.247 |
| 147457 | 8 | 130867827 | 130867827 | G | A | SNP | FAM49B          | ENST00000401979 | -1 | intronic                    | c.438+30     | e4+30    | tier3 | 94  | 2 | 0.021 | 114  | 54  | 0.321 |
| 147457 | 8 | 143618381 | 143618381 | C | T | SNP | BAI1            | ENST00000323289 | 1  | missense                    | c.3604       | p.R1202W | tier1 | 62  | 0 | 0.000 | 548  | 236 | 0.300 |
| 147457 | 8 | 143783019 | 143783019 | C | T | SNP | LY6K            | ENST00000561179 | 1  | silent                      | c.279        | p.D93    | tier1 | 135 | 1 | 0.007 | 203  | 76  | 0.271 |
| 147457 | 8 | 144620573 | 144620573 | G | A | SNP | ZC3H3           | ENST00000262577 | -1 | missense                    | c.964        | p.R322W  | tier1 | 59  | 0 | 0.000 | 206  | 85  | 0.292 |
| 147457 | 8 | 144946163 | 144946163 | C | T | SNP | EPPK1           | ENST00000525985 | -1 | missense                    | c.1259       | p.R420H  | tier1 | 75  | 0 | 0.000 | 324  | 155 | 0.323 |
| 147457 | 9 | 368135    | 368135    | G | A | SNP | DOCK8           | ENST00000453981 | 1  | silent                      | c.1797       | p.P599   | tier1 | 61  | 0 | 0.000 | 191  | 95  | 0.311 |
| 147457 | 9 | 34551979  | 34551979  | G | A | SNP | CNTFR           | ENST00000351266 | -1 | 3_prime_untranslated_region | c.*90        | NULL     | tier2 | 105 | 1 | 0.009 | 312  | 113 | 0.265 |
| 147457 | 9 | 35664015  | 35664015  | G | A | SNP | C9orf100        | ENST00000378387 | -1 | missense                    | c.463        | p.R155W  | tier1 | 48  | 1 | 0.020 | 155  | 77  | 0.332 |
| 147457 | 9 | 38577921  | 38577921  | C | T | SNP | ANKRD18A        | ENST00000399703 | -1 | silent                      | c.2472       | p.S824   | tier1 | 266 | 4 | 0.015 | 513  | 229 | 0.308 |
| 147457 | 9 | 39176062  | 39176062  | C | T | SNP | CNTNAP3         | ENST00000297668 | -1 | missense                    | c.955        | p.G319R  | tier1 | 467 | 4 | 0.009 | 683  | 36  | 0.050 |
| 147457 | 9 | 43709787  | 43709787  | C | T | SNP | CNTNAP3B        | ENST00000377564 | 1  | intronic                    | c.196+27     | e2+27    | tier3 | 255 | 5 | 0.019 | 628  | 289 | 0.315 |
| 147457 | 9 | 45120270  | 45120270  | G | A | SNP | ENSG00000231838 | ENST00000417850 | 1  | 5_prime_flanking_region     | c.-44308     | NULL     | tier3 | 30  | 0 | 0.000 | 177  | 69  | 0.279 |
| 147457 | 9 | 66500729  | 66500729  | G | A | SNP | CDK2AP2P2       | ENST00000478512 | 1  | 3_prime_untranslated_region | c.*66500729  | NULL     | tier3 | 96  | 1 | 0.010 | 1004 | 101 | 0.091 |
| 147457 | 9 | 78973784  | 78973784  | C | T | SNP | PCSK5           | ENST00000545128 | 1  | silent                      | c.5529       | p.D1843  | tier1 | 67  | 1 | 0.015 | 185  | 107 | 0.365 |
| 147457 | 9 | 82333659  | 82333659  | G | A | SNP | TLE4            | ENST00000376520 | 1  | missense                    | c.1459       | p.A487T  | tier1 | 73  | 2 | 0.027 | 169  | 72  | 0.299 |
| 147457 | 9 | 95872991  | 95872991  | C | T | SNP | C9orf89         | ENST00000466409 | 1  | missense                    | c.292        | p.R98C   | tier1 | 19  | 0 | 0.000 | 224  | 106 | 0.320 |
| 147457 | 9 | 97847849  | 97847849  | G | A | SNP | C9orf3          | ENST00000375315 | 1  | intronic                    | c.2460-1115  | e16-1115 | tier3 | 43  | 2 | 0.044 | 89   | 42  | 0.321 |
| 147457 | 9 | 99711889  | 99711889  | C | T | SNP | HIATL2          | ENST00000375223 | -1 | missense                    | c.343        | p.G115S  | tier1 | 83  | 3 | 0.035 | 229  | 105 | 0.313 |
| 147457 | 9 | 103339628 | 103339628 | G | A | SNP | TMEFF1          | ENST00000374879 | 1  | 3_prime_untranslated_region | c.*746       | NULL     | tier2 | 154 | 1 | 0.007 | 237  | 85  | 0.263 |
| 147457 | 9 | 104124794 | 104124794 | G | A | SNP | BAAT            | ENST00000259407 | -1 | silent                      | c.1173       | p.H391   | tier1 | 60  | 0 | 0.000 | 107  | 65  | 0.376 |
| 147457 | 9 | 112017768 | 112017768 | G | A | SNP | EPB41L4B        | ENST00000374566 | -1 | intronic                    | c.1169+23    | e11+23   | tier3 | 54  | 0 | 0.000 | 154  | 58  | 0.271 |
| 147457 | 9 | 116050499 | 116050499 | C | T | SNP | PRPF4           | ENST00000374198 | 1  | missense                    | c.980        | p.A327V  | tier1 | 78  | 0 | 0.000 | 160  | 59  | 0.269 |
| 147457 | 9 | 117087344 | 117087344 | C | T | SNP | ORM1            | ENST00000259396 | 1  | missense                    | c.452        | p.T151M  | tier1 | 31  | 0 | 0.000 | 158  | 58  | 0.269 |
| 147457 | 9 | 117143546 | 117143546 | C | T | SNP | AKNA            | ENST00000307564 | -1 | missense                    | c.68         | p.R23H   | tier1 | 60  | 0 | 0.000 | 212  | 77  | 0.266 |
| 147457 | 9 | 123370046 | 123370046 | C | T | SNP | MEGF9           | ENST00000426959 | -1 | missense                    | c.1441       | p.D481N  | tier1 | 85  | 1 | 0.012 | 224  | 79  | 0.259 |
| 147457 | 9 | 127572232 | 127572232 | G | A | SNP | OLFML2A         | ENST00000373580 | 1  | silent                      | c.1500       | p.A500   | tier1 | 21  | 0 | 0.000 | 153  | 51  | 0.249 |
| 147457 | 9 | 131394806 | 131394806 |   |   |     |                 |                 |    |                             |              |          |       |     |   |       |      |     |       |

|        |    |           |           |   |   |     |                        |                 |    |                             |             |          |       |     |   |       |     |     |       |
|--------|----|-----------|-----------|---|---|-----|------------------------|-----------------|----|-----------------------------|-------------|----------|-------|-----|---|-------|-----|-----|-------|
| 147457 | 10 | 11805425  | 11805425  | C | T | SNP | <i>ECHDC3</i>          | ENST00000379215 | 1  | missense                    | c.794       | p.T265M  | tier1 | 26  | 1 | 0.037 | 214 | 118 | 0.354 |
| 147457 | 10 | 21827795  | 21827795  | C | T | SNP | <i>MLLT10</i>          | ENST00000307729 | 1  | missense                    | c.194       | p.P65L   | tier1 | 109 | 1 | 0.009 | 172 | 70  | 0.289 |
| 147457 | 10 | 25890983  | 25890983  | G | A | SNP | <i>GPR158</i>          | ENST00000376351 | 1  | 3_prime_untranslated_region | c.*2780     | NULL     | tier2 | 80  | 0 | 0.000 | 123 | 52  | 0.294 |
| 147457 | 10 | 27048066  | 27048066  | G | A | SNP | <i>ABI1</i>            | ENST00000355394 | -1 | nonsense                    | c.1006      | p.R336*  | tier1 | 125 | 2 | 0.016 | 189 | 75  | 0.284 |
| 147457 | 10 | 28023604  | 28023604  | G | A | SNP | <i>MKX</i>             | ENST00000375790 | -1 | missense                    | c.619       | p.R207W  | tier1 | 104 | 1 | 0.010 | 225 | 78  | 0.257 |
| 147457 | 10 | 29773728  | 29773728  | G | A | SNP | <i>SVIL</i>            | ENST00000355867 | -1 | silent                      | c.4812      | p.Y1604  | tier1 | 202 | 2 | 0.010 | 287 | 114 | 0.284 |
| 147457 | 10 | 29813480  | 29813480  | C | T | SNP | <i>SVIL</i>            | ENST00000355867 | -1 | missense                    | c.2507      | p.R836Q  | tier1 | 117 | 4 | 0.033 | 173 | 71  | 0.290 |
| 147457 | 10 | 30654823  | 30654823  | C | T | SNP | <i>ENSG00000241621</i> | ENST00000340929 | -1 | 5_prime_untranslated_region | c.-30654823 | NULL     | tier3 | 96  | 0 | 0.000 | 546 | 236 | 0.302 |
| 147457 | 10 | 34671634  | 34671634  | C | T | SNP | <i>PARD3</i>           | ENST00000374789 | -1 | silent                      | c.1233      | p.P411   | tier1 | 142 | 0 | 0.000 | 132 | 69  | 0.342 |
| 147457 | 10 | 46210567  | 46210567  | G | A | SNP | <i>ENSG00000237840</i> | ENST00000426241 | -1 | intronic                    | c.NULL      | NULL     | tier3 | 296 | 2 | 0.007 | 713 | 211 | 0.228 |
| 147457 | 10 | 47747160  | 47747160  | G | A | SNP | <i>ENSG00000244599</i> | ENST00000445847 | 1  | 3_prime_untranslated_region | c.*47747160 | NULL     | tier3 | 68  | 1 | 0.015 | 210 | 90  | 0.300 |
| 147457 | 10 | 64967543  | 64967543  | C | T | SNP | <i>JMJD1C</i>          | ENST00000399262 | -1 | missense                    | c.3886      | p.G1296R | tier1 | 79  | 0 | 0.000 | 127 | 52  | 0.291 |
| 147457 | 10 | 86004953  | 86004953  | C | T | SNP | <i>RGR</i>             | ENST00000359452 | 1  | intronic                    | c.79+28     | e1+28    | tier3 | 11  | 0 | 0.000 | 84  | 56  | 0.397 |
| 147457 | 10 | 87379729  | 87379729  | G | A | SNP | <i>GRID1</i>           | ENST00000327946 | -1 | missense                    | c.2255      | p.T752M  | tier1 | 188 | 3 | 0.016 | 648 | 297 | 0.314 |
| 147457 | 10 | 87482902  | 87482902  | C | T | SNP | <i>GRID1</i>           | ENST00000327946 | -1 | splice_region               | c.1859-4    | e12-4    | tier2 | 44  | 0 | 0.000 | 203 | 98  | 0.325 |
| 147457 | 10 | 87966282  | 87966282  | G | A | SNP | <i>GRID1</i>           | ENST00000327946 | -1 | missense                    | c.359       | p.P120L  | tier1 | 134 | 1 | 0.007 | 510 | 257 | 0.335 |
| 147457 | 10 | 99019280  | 99019280  | C | T | SNP | <i>ARHGAP19</i>        | ENST00000453547 | -1 | missense                    | c.719       | p.R240H  | tier1 | 133 | 0 | 0.000 | 235 | 116 | 0.331 |
| 147457 | 10 | 100022513 | 100022513 | G | A | SNP | <i>LOXL4</i>           | ENST00000260702 | -1 | silent                      | c.264       | p.Y88    | tier1 | 38  | 0 | 0.000 | 280 | 121 | 0.302 |
| 147457 | 10 | 103870964 | 103870964 | G | A | SNP | <i>LDB1</i>            | ENST00000425280 | -1 | intronic                    | c.173+49    | e3+49    | tier3 | 81  | 3 | 0.036 | 144 | 62  | 0.300 |
| 147457 | 10 | 104245343 | 104245343 | C | T | SNP | <i>ACTR1A</i>          | ENST00000369905 | -1 | intronic                    | c.440+23    | e5+23    | tier3 | 59  | 1 | 0.017 | 197 | 73  | 0.269 |
| 147457 | 10 | 104628872 | 104628872 | C | T | SNP | <i>C10orf32</i>        | ENST00000299353 | 1  | intronic                    | c.321-690   | e6-690   | tier4 | 80  | 2 | 0.024 | 100 | 27  | 0.213 |
| 147457 | 10 | 106160477 | 106160477 | C | T | SNP | <i>CCDC147</i>         | ENST00000369704 | 1  | missense                    | c.1855      | p.R619W  | tier1 | 56  | 0 | 0.000 | 121 | 59  | 0.326 |
| 147457 | 10 | 116008560 | 116008560 | C | T | SNP | <i>VWA2</i>            | ENST00000392982 | 1  | intronic                    | c.52+36     | e1+36    | tier3 | 140 | 1 | 0.007 | 167 | 82  | 0.329 |
| 147457 | 10 | 118969094 | 118969094 | G | A | SNP | <i>KCNK18</i>          | ENST00000334549 | 1  | missense                    | c.439       | p.V147I  | tier1 | 90  | 1 | 0.011 | 165 | 70  | 0.298 |
| 147457 | 10 | 123976222 | 123976222 | G | A | SNP | <i>TACC2</i>           | ENST00000334433 | 1  | silent                      | c.7425      | p.A2475  | tier1 | 31  | 0 | 0.000 | 156 | 66  | 0.297 |
| 147457 | 10 | 124402685 | 124402685 | G | A | SNP | <i>DMBT1</i>           | ENST00000368915 | 1  | missense                    | c.7400      | p.R2467H | tier1 | 64  | 0 | 0.000 | 245 | 86  | 0.259 |
| 147457 | 10 | 135011989 | 135011989 | C | T | SNP | <i>KNDC1</i>           | ENST00000368572 | 1  | silent                      | c.2055      | p.N685   | tier1 | 20  | 0 | 0.000 | 367 | 142 | 0.278 |
| 147457 | 11 | 1215595   | 1215595   | G | A | SNP | <i>MUC5AC</i>          | ENST00000358378 | 1  | splice_region               | c.NULL      | NULL     | tier2 | 13  | 0 | 0.000 | 205 | 106 | 0.339 |
| 147457 | 11 | 1316941   | 1316941   | C | T | SNP | <i>TOLLIP</i>          | ENST00000317204 | -1 | silent                      | c.117       | p.A39    | tier1 | 21  | 0 | 0.000 | 264 | 104 | 0.282 |
| 147457 | 11 | 1997630   | 1997630   | C | T | SNP | <i>MRPL23</i>          | ENST00000397297 | 1  | intronic                    | c.497+3642  | e5+3642  | tier3 | 77  | 3 | 0.038 | 708 | 273 | 0.277 |
| 147457 | 11 | 6048700   | 6048700   | C | T | SNP | <i>OR56A1</i>          | ENST00000316650 | -1 | missense                    | c.235       | p.V79M   | tier1 | 49  | 0 | 0.000 | 301 | 134 | 0.307 |
| 147457 | 11 | 6232207   | 6232207   | G | A | SNP | <i>C11orf42</i>        | ENST00000316375 | 1  | missense                    | c.937       | p.D313N  | tier1 | 36  | 1 | 0.027 | 199 | 95  | 0.323 |
| 147457 | 11 | 10500213  | 10500213  | C | T | SNP | <i>AMPD3</i>           | ENST00000396553 | 1  | missense                    | c.362       | p.T121M  | tier1 | 34  | 0 | 0.000 | 131 | 87  | 0.399 |
| 147457 | 11 | 16036588  | 16036588  | C | T | SNP | <i>SOX6</i>            | ENST00000352083 | -1 | silent                      | c.1632      | p.T544   | tier1 | 152 | 3 | 0.019 | 154 | 60  | 0.280 |
| 147457 | 11 | 16823374  | 16823374  | G | A | SNP | <i>PLEKHHA7</i>        | ENST00000448080 | -1 | splice_region               | c.2158-10   | e16-10   | tier3 | 29  | 0 | 0.000 | 156 | 50  | 0.243 |
| 147457 | 11 | 17659970  | 17659970  | C | T | SNP | <i>OTOG</i>            | ENST00000399391 | 1  | intronic                    | c.7832-28   | e47-28   | tier3 | 25  | 0 | 0.000 | 90  | 41  | 0.313 |
| 147457 | 11 | 17801160  | 17801160  | C | T | SNP | <i>KCNC1</i>           | ENST00000265969 | 1  | silent                      | c.1662      | p.Y554   | tier1 | 37  | 0 | 0.000 | 216 | 84  | 0.280 |
| 147457 | 11 | 26558879  | 26558879  | G | A | SNP | <i>ANO3</i>            | ENST00000256737 | 1  | intronic                    | c.977-74    | e10-74   | tier3 | 103 | 3 | 0.028 | 130 | 62  | 0.323 |
| 147457 | 11 | 43515299  | 43515299  | C | T | SNP | <i>TTC17</i>           | ENST0000039989  | 1  | intronic                    | c.3295-24   | e24-24   | tier3 | 87  | 3 | 0.033 | 185 | 71  | 0.277 |
| 147457 | 11 | 44253924  | 44253924  | C | T | SNP | <i>EXT2</i>            | ENST00000395673 | 1  | missense                    | c.1783      | p.R595W  | tier1 | 77  | 3 | 0.038 | 182 | 75  | 0.292 |
| 147457 | 11 | 45877647  | 45877647  | C | T | SNP | <i>CRY2</i>            | ENST00000496571 | 1  | 3_prime_untranslated_region | c.*45877647 | NULL     | tier3 | 42  | 1 | 0.023 | 139 | 85  | 0.380 |
| 147457 | 11 | 45950277  | 45950277  | C | T | SNP | <i>GYLTL1B</i>         | ENST00000325468 | 1  | missense                    | c.2047      | p.R683C  | tier1 | 45  | 2 | 0.043 | 301 | 103 | 0.255 |
| 147457 | 11 | 46741344  | 46741344  | C | T | SNP | <i>F2</i>              | ENST00000311907 | 1  | nonsense                    | c.172       | p.R58*   | tier1 | 47  | 2 | 0.041 | 243 | 145 | 0.374 |
| 147457 | 11 | 46819420  | 46819420  | G | A | SNP | <i>CKAP5</i>           | ENST00000415402 | -1 | missense                    | c.1273      | p.R425C  | tier1 | 174 | 1 | 0.006 | 218 | 77  | 0.260 |
| 147457 | 11 | 49897778  | 49897778  | C | A | SNP | <i>OR4R3P</i>          | ENST00000525084 | 1  | 5_prime_flanking_region     | c.-46823    | NULL     | tier3 | 251 | 3 | 0.012 | 424 | 188 | 0.307 |
| 147457 | 11 | 55322719  | 55322719  | C | T | SNP | <i>OR4C15</i>          | ENST00000314644 | 1  | nonsense                    | c.937       | p.R313*  | tier1 | 100 | 2 | 0.020 | 139 | 69  | 0.330 |
| 147457 | 11 | 55761663  | 55761663  | G | T | SNP | <i>OR5F1</i>           | ENST00000278409 | -1 | missense                    | c.439       | p.G147R  | tier1 | 48  | 0 | 0.000 | 158 | 74  | 0.319 |
| 147457 | 11 | 55839272  | 55839272  | C | A | SNP | <i>OR5J1P</i>          | ENST00000313544 | 1  | 3_prime_untranslated_region | c.*55839272 | NULL     | tier3 | 23  | 0 | 0.000 | 56  | 23  | 0.291 |
| 147457 | 11 | 59623312  | 59623312  | G | A | SNP | <i>TCN1</i>            | ENST00000257264 | -1 | intronic                    | c.937+30    | e6+30    | tier3 | 67  | 0 | 0.000 | 112 | 38  | 0.253 |
| 147457 | 11 | 61295431  | 61295431  | C | T | SNP | <i>SYT7</i>            | ENST00000263846 | -1 | missense                    | c.578       | p.R193Q  | tier1 | 60  | 0 | 0.000 | 151 | 66  | 0.301 |
| 147457 | 11 | 62571274  | 62571274  | G | A | SNP | <i>NXF1</i>            | ENST00000294172 | -1 | nonsense                    | c.205       | p.R69*   | tier1 | 37  | 0 | 0.000 | 97  | 41  | 0.297 |
| 147457 | 11 | 62751103  | 62751103  | G | A | SNP | <i>SLC22A6</i>         | ENST00000540654 | -1 | missense                    | c.511       | p.R171C  | tier1 | 19  | 0 | 0.000 | 199 | 102 | 0.338 |
| 147457 | 11 | 64882321  | 64882321  | C | T | SNP | <i>TM7SF2</i>          | ENST00000528026 | 1  | 3_prime_untranslated_region | c.*64882321 | NULL     | tier3 | 24  | 0 | 0.000 | 153 | 55  | 0.264 |
| 147457 | 11 | 64882420  | 64882420  | C | T | SNP | <i>TM7SF2</i>          | ENST00000528802 | 1  | missense                    | c.242       | p.T81M   | tier1 | 20  | 0 | 0.000 | 128 | 43  | 0.252 |
| 147457 | 11 | 65305479  | 65305479  | C | T | SNP | <i>SCYL1</i>           | ENST00000533862 | 1  | missense                    | c.2036      | p.P679L  | tier1 | 15  | 0 | 0.000 | 97  | 55  | 0.362 |
| 147457 | 11 | 65427692  | 65427692  | C | T | SNP | <i>RELA</i>            | ENST00000526738 | -1 | 5_prime_untranslated_region | c.-65427692 | NULL     | tier3 | 35  | 0 | 0.000 | 141 | 49  | 0.258 |
| 147457 | 11 | 66103134  | 66103134  | C | T | SNP | <i>RIN1</i>            | ENST00000530745 | -1 | missense                    | c.221       | p.R74Q   | tier1 | 31  | 0 | 0.000 | 208 | 77  | 0.269 |
| 147457 | 11 | 66633819  | 66633819  | C | T | SNP | <i>PC</i>              | ENST00000393958 | -1 | missense                    | c.1024      | p.V342I  | tier1 | 37  | 0 | 0.000 | 319 | 115 | 0.263 |
| 147457 | 11 | 67209188  | 67209188  | G | A | SNP | <i>CORO1B</i>          | ENST00000545016 | -1 | missense                    | c.470       | p.P157L  | tier1 | 22  | 0 | 0.000 | 142 | 53  | 0.270 |
| 147457 | 11 | 67795455  | 67795455  | C | T | SNP | <i>ALDH3B1</i>         | ENST00000007633 | 1  | 3_prime_untranslated_region | c.*67795455 | NULL     | tier3 | 36  | 2 | 0.053 | 356 | 166 | 0.317 |
| 147457 | 11 | 68701368  | 68701368  | G | A | SNP | <i>IGHMBP2</i>         | ENST00000255078 | 1  | silent                      | c.1524      | p.S508   | tier1 | 84  | 1 | 0.012 | 296 | 154 | 0.342 |
| 147457 | 11 | 68822767  | 68822767  | G | A | SNP | <i>TPCN2</i>           | ENST00000294309 | 1  | missense                    | c.376       | p.E126K  | tier1 | 32  | 0 | 0.000 | 98  | 39  | 0.285 |
| 147457 | 11 | 72540399  | 72540399  | C | T | SNP | <i>ATG16L2</i>         | ENST00000540222 | 1  | missense                    | c.1156      | p.R386C  | tier1 | 28  | 1 | 0.035 | 316 | 147 | 0.314 |
| 147457 | 11 | 74559446  | 74559446  | G | A | SNP | <i>XRR1</i>            | ENST00000340360 | -1 | missense                    | c.1418      | p.T473M  | tier1 | 28  | 0 | 0.000 | 70  | 33  | 0.320 |
| 147457 | 11 | 78565287  | 78565287  | G | A | SNP | <i>ODZ4</i>            | ENST00000278550 | -1 | missense                    | c.1543      | p.R515C  | tier1 | 76  | 3 | 0.038 | 257 | 104 | 0.288 |
| 147457 | 11 | 99827584  | 99827584  | G | A | SNP | <i>CNTN5</i>           | ENST00000279463 | 1  | silent                      | c.720       | p.A240   | tier1 | 245 | 4 | 0.016 | 575 | 250 | 0.303 |
| 147457 | 11 | 104872776 | 104872776 | G | A | SNP | <i>CASP5</i>           | ENST00000393141 | -1 | silent                      | c.735       | p.D245   | tier1 | 73  | 0 |       |     |     |       |



|        |    |           |           |   |   |     |                 |                 |    |                             |             |          |       |     |   |       |     |     |       |
|--------|----|-----------|-----------|---|---|-----|-----------------|-----------------|----|-----------------------------|-------------|----------|-------|-----|---|-------|-----|-----|-------|
| 147457 | 11 | 123909293 | 123909293 | G | A | SNP | OR10G7          | ENST00000330487 | -1 | missense                    | c.416       | p.S139L  | tier1 | 68  | 0 | 0.000 | 204 | 117 | 0.363 |
| 147457 | 12 | 3390547   | 3390547   | C | T | SNP | TSPAN9          | ENST00000011898 | 1  | intronic                    | c.564+52    | e5+52    | tier2 | 19  | 0 | 0.000 | 183 | 66  | 0.264 |
| 147457 | 12 | 4722773   | 4722773   | G | A | SNP | DYRK4           | ENST00000010132 | 1  | missense                    | c.1417      | p.G473R  | tier1 | 67  | 2 | 0.029 | 169 | 82  | 0.323 |
| 147457 | 12 | 5154521   | 5154521   | G | A | SNP | KCNA5           | ENST00000252321 | 1  | missense                    | c.1208      | p.R403H  | tier1 | 43  | 0 | 0.000 | 112 | 54  | 0.325 |
| 147457 | 12 | 7125761   | 7125761   | G | T | SNP | LPCAT3          | ENST00000261407 | -1 | 5_prime_untranslated_region | c.-33       | NULL     | tier2 | 28  | 0 | 0.000 | 205 | 80  | 0.281 |
| 147457 | 12 | 7922788   | 7922788   | C | T | SNP | NANOGNB         | ENST00000382119 | 1  | silent                      | c.312       | p.P104   | tier1 | 90  | 0 | 0.000 | 193 | 80  | 0.292 |
| 147457 | 12 | 10659128  | 10659128  | G | A | SNP | ENSG00000180574 | ENST00000538173 | 1  | silent                      | c.627       | p.A209   | tier1 | 224 | 3 | 0.013 | 295 | 128 | 0.303 |
| 147457 | 12 | 16713647  | 16713647  | G | A | SNP | LMO3            | ENST00000541295 | -1 | intronic                    | c.261-175   | e3-175   | tier2 | 45  | 0 | 0.000 | 123 | 70  | 0.363 |
| 147457 | 12 | 18644489  | 18644489  | C | T | SNP | PIK3C2G         | ENST00000538779 | 1  | silent                      | c.2790      | p.H930   | tier1 | 74  | 0 | 0.000 | 137 | 60  | 0.303 |
| 147457 | 12 | 31135422  | 31135422  | C | T | SNP | TSPAN11         | ENST00000261177 | 1  | intronic                    | c.457-45    | e5-45    | tier2 | 69  | 1 | 0.014 | 216 | 85  | 0.282 |
| 147457 | 12 | 40758824  | 40758824  | G | A | SNP | LRRK2           | ENST00000298910 | 1  | silent                      | c.7362      | p.S2454  | tier1 | 185 | 2 | 0.011 | 172 | 87  | 0.336 |
| 147457 | 12 | 40820395  | 40820395  | C | T | SNP | MUC19           | ENST00000425730 | 1  | nonsense                    | c.1060      | p.R354*  | tier1 | 93  | 0 | 0.000 | 183 | 78  | 0.299 |
| 147457 | 12 | 41337805  | 41337805  | C | T | SNP | CNTN1           | ENST00000347616 | 1  | nonsense                    | c.1516      | p.R506*  | tier1 | 45  | 0 | 0.000 | 30  | 23  | 0.434 |
| 147457 | 12 | 47630017  | 47630017  | C | T | SNP | FAM113B         | ENST00000432328 | 1  | missense                    | c.1171      | p.R391W  | tier1 | 29  | 0 | 0.000 | 85  | 38  | 0.309 |
| 147457 | 12 | 48723716  | 48723716  | C | T | SNP | H1FNT           | ENST00000335017 | 1  | silent                      | c.642       | p.D214   | tier1 | 15  | 0 | 0.000 | 204 | 119 | 0.368 |
| 147457 | 12 | 49719830  | 49719830  | C | T | SNP | TROAP           | ENST00000257909 | 1  | intronic                    | c.634-29    | e5-29    | tier3 | 112 | 1 | 0.009 | 241 | 74  | 0.235 |
| 147457 | 12 | 56607793  | 56607793  | G | A | SNP | RNF41           | ENST00000345093 | -1 | silent                      | c.39        | p.D13    | tier1 | 47  | 0 | 0.000 | 174 | 59  | 0.252 |
| 147457 | 12 | 65230315  | 65230315  | G | A | SNP | TBC1D30         | ENST00000229088 | 1  | missense                    | c.1129      | p.V377I  | tier1 | 133 | 1 | 0.007 | 152 | 77  | 0.336 |
| 147457 | 12 | 111345179 | 111345179 | G | A | SNP | CCDC63          | ENST00000308208 | 1  | missense                    | c.1591      | p.D531N  | tier1 | 18  | 0 | 0.000 | 109 | 44  | 0.288 |
| 147457 | 12 | 117653072 | 117653072 | C | T | SNP | NOS1            | ENST00000317775 | -1 | 3_prime_untranslated_region | c.*42       | NULL     | tier3 | 48  | 0 | 0.000 | 205 | 91  | 0.307 |
| 147457 | 12 | 119583293 | 119583293 | G | A | SNP | SRRM4           | ENST00000267260 | 1  | silent                      | c.879       | p.S293   | tier1 | 30  | 1 | 0.032 | 150 | 98  | 0.392 |
| 147457 | 12 | 123001856 | 123001856 | G | A | SNP | RSRC2           | ENST00000331738 | -1 | missense                    | c.520       | p.R174W  | tier1 | 141 | 1 | 0.007 | 215 | 112 | 0.342 |
| 147457 | 12 | 123201344 | 123201344 | G | A | SNP | HCAR3           | ENST00000528880 | -1 | 5_prime_untranslated_region | c.-60       | NULL     | tier3 | 55  | 1 | 0.018 | 174 | 55  | 0.240 |
| 147457 | 12 | 124175149 | 124175149 | G | A | SNP | TCTN2           | ENST00000303372 | 1  | missense                    | c.961       | p.V321I  | tier1 | 86  | 1 | 0.012 | 150 | 66  | 0.306 |
| 147457 | 12 | 124422048 | 124422048 | C | T | SNP | CCDC92          | ENST00000238156 | -1 | missense                    | c.553       | p.V185M  | tier1 | 19  | 0 | 0.000 | 100 | 58  | 0.367 |
| 147457 | 12 | 131498748 | 131498748 | G | A | SNP | GPR133          | ENST00000261654 | 1  | missense                    | c.1336      | p.A446T  | tier1 | 36  | 1 | 0.027 | 98  | 44  | 0.310 |
| 147457 | 12 | 133181273 | 133181273 | G | A | SNP | ENSG00000204583 | ENST00000376608 | -1 | intronic                    | c.NULL      | NULL     | tier2 | 14  | 0 | 0.000 | 123 | 62  | 0.330 |
| 147457 | 13 | 21562125  | 21562125  | C | T | SNP | LATS2           | ENST00000382592 | -1 | silent                      | c.1794      | p.S598   | tier1 | 204 | 2 | 0.010 | 278 | 143 | 0.339 |
| 147457 | 13 | 23928871  | 23928871  | G | A | SNP | SACS            | ENST00000382292 | -1 | missense                    | c.1880      | p.T627M  | tier1 | 28  | 0 | 0.000 | 81  | 44  | 0.349 |
| 147457 | 13 | 24410420  | 24410420  | G | A | SNP | MIPEP           | ENST00000382172 | -1 | nonsense                    | c.1612      | p.R538*  | tier1 | 136 | 4 | 0.029 | 205 | 104 | 0.337 |
| 147457 | 13 | 28133957  | 28133957  | A | - | DEL | LNX2            | ENST00000316334 | -1 | intronic                    | c.1368+22   | e5+22    | tier2 | 49  | 0 | 0.000 | 142 | 30  | 0.174 |
| 147457 | 13 | 39450219  | 39450219  | G | A | SNP | FREM2           | ENST00000280481 | 1  | missense                    | c.8342      | p.R2781H | tier1 | 144 | 0 | 0.000 | 447 | 175 | 0.280 |
| 147457 | 13 | 45857726  | 45857726  | C | T | SNP | GTF2F2          | ENST00000340473 | 1  | 3_prime_untranslated_region | c.*30       | NULL     | tier3 | 21  | 0 | 0.000 | 86  | 29  | 0.250 |
| 147457 | 13 | 58299227  | 58299227  | C | T | SNP | PCDH17          | ENST00000377918 | 1  | silent                      | c.3279      | p.S1093  | tier1 | 50  | 0 | 0.000 | 116 | 76  | 0.396 |
| 147457 | 13 | 95118904  | 95118904  | G | A | SNP | DCT             | ENST00000446125 | -1 | missense                    | c.604       | p.R202C  | tier1 | 60  | 1 | 0.016 | 168 | 58  | 0.257 |
| 147457 | 13 | 111329450 | 111329450 | G | A | SNP | CARS2           | ENST00000257347 | -1 | missense                    | c.656       | p.A219V  | tier1 | 39  | 0 | 0.000 | 196 | 75  | 0.274 |
| 147457 | 13 | 113838700 | 113838700 | G | A | SNP | PCID2           | ENST00000246505 | -1 | silent                      | c.807       | p.Y269   | tier1 | 164 | 4 | 0.024 | 214 | 91  | 0.298 |
| 147457 | 14 | 21552150  | 21552150  | C | T | SNP | ARHGEF40        | ENST00000298694 | 1  | missense                    | c.3730      | p.R1244W | tier1 | 35  | 0 | 0.000 | 416 | 179 | 0.301 |
| 147457 | 14 | 21861926  | 21861926  | C | T | SNP | CHD8            | ENST00000399982 | -1 | missense                    | c.6028      | p.E2010K | tier1 | 30  | 0 | 0.000 | 138 | 73  | 0.346 |
| 147457 | 14 | 38261600  | 38261600  | G | A | SNP | TTC6            | ENST00000553443 | 1  | missense                    | c.3689      | p.R1230Q | tier1 | 140 | 2 | 0.014 | 229 | 71  | 0.237 |
| 147457 | 14 | 45664649  | 45664649  | G | A | SNP | FANCM           | ENST00000267430 | 1  | intronic                    | c.5341-726  | e21-726  | tier3 | 47  | 0 | 0.000 | 80  | 31  | 0.279 |
| 147457 | 14 | 52471285  | 52471285  | C | T | SNP | C14orf166       | ENST00000261700 | 1  | 3_prime_untranslated_region | c.*51       | NULL     | tier3 | 76  | 0 | 0.000 | 132 | 66  | 0.333 |
| 147457 | 14 | 57713531  | 57713531  | C | T | SNP | EXOC5           | ENST00000413566 | -1 | missense                    | c.168       | p.M56I   | tier1 | 89  | 1 | 0.011 | 137 | 51  | 0.271 |
| 147457 | 14 | 68047847  | 68047847  | G | A | SNP | PLEKHH1         | ENST00000329153 | 1  | intronic                    | c.3284+92   | e22+92   | tier3 | 42  | 0 | 0.000 | 233 | 92  | 0.283 |
| 147457 | 14 | 76259462  | 76259462  | G | A | SNP | TLL5            | ENST00000298832 | 1  | intronic                    | c.3171+19   | e26+19   | tier3 | 19  | 0 | 0.000 | 80  | 51  | 0.389 |
| 147457 | 14 | 91211188  | 91211188  | C | T | SNP | TTC7B           | ENST00000357056 | -1 | missense                    | c.524       | p.C175Y  | tier1 | 71  | 1 | 0.014 | 171 | 77  | 0.308 |
| 147457 | 14 | 91700696  | 91700696  | G | A | SNP | GPR68           | ENST00000238699 | -1 | silent                      | c.729       | p.T243   | tier1 | 32  | 1 | 0.030 | 250 | 118 | 0.320 |
| 147457 | 14 | 92136153  | 92136153  | C | T | SNP | CATSPERB        | ENST00000256343 | -1 | splice_region               | c.1287+5    | e13+5    | tier3 | 92  | 0 | 0.000 | 142 | 63  | 0.304 |
| 147457 | 14 | 93681299  | 93681299  | G | A | SNP | UBR7            | ENST00000013070 | 1  | missense                    | c.466       | p.V156I  | tier1 | 104 | 3 | 0.028 | 181 | 81  | 0.309 |
| 147457 | 14 | 93706769  | 93706769  | G | A | SNP | BTBD7           | ENST00000334746 | -1 | 3_prime_untranslated_region | c.*1850     | NULL     | tier2 | 152 | 1 | 0.007 | 290 | 24  | 0.076 |
| 147457 | 14 | 102801015 | 102801015 | G | A | SNP | ZNF839          | ENST00000442396 | 1  | intronic                    | c.1509+32   | e4+32    | tier3 | 124 | 1 | 0.008 | 185 | 59  | 0.241 |
| 147457 | 14 | 105419206 | 105419206 | G | A | SNP | AHNAK2          | ENST00000333244 | -1 | missense                    | c.2582      | p.P861L  | tier1 | 160 | 1 | 0.006 | 778 | 202 | 0.206 |
| 147457 | 15 | 23313159  | 23313159  | G | A | SNP | HERC2P2         | ENST00000560464 | -1 | 5_prime_untranslated_region | c.-23313159 | NULL     | tier2 | 81  | 2 | 0.024 | 386 | 186 | 0.325 |
| 147457 | 15 | 23606950  | 23606950  | C | T | SNP | ENSG00000261739 | ENST00000562295 | 1  | intronic                    | c.1179+11   | e13+11   | tier2 | 45  | 0 | 0.000 | 283 | 132 | 0.317 |
| 147457 | 15 | 25349836  | 25349836  | C | T | SNP | SNORD116-28     | ENST00000516123 | 1  | rna                         | NULL        | NULL     | tier1 | 115 | 0 | 0.000 | 218 | 102 | 0.319 |
| 147457 | 15 | 28517461  | 28517461  | C | T | SNP | HERC2           | ENST00000261609 | -1 | missense                    | c.983       | p.R328H  | tier1 | 160 | 1 | 0.006 | 819 | 61  | 0.069 |
| 147457 | 15 | 33358756  | 33358756  | G | A | SNP | FMN1            | ENST00000334528 | -1 | missense                    | c.1330      | p.R444W  | tier1 | 59  | 0 | 0.000 | 144 | 61  | 0.298 |
| 147457 | 15 | 33936693  | 33936693  | C | T | SNP | RYR3            | ENST00000389232 | 1  | silent                      | c.3738      | p.N1246  | tier1 | 145 | 2 | 0.014 | 481 | 250 | 0.341 |
| 147457 | 15 | 40099429  | 40099429  | C | T | SNP | GPR176          | ENST00000561100 | -1 | missense                    | c.203       | p.R68H   | tier1 | 78  | 0 | 0.000 | 232 | 82  | 0.261 |
| 147457 | 15 | 40532849  | 40532849  | C | T | SNP | ENSG00000259288 | ENST00000558658 | 1  | missense                    | c.131       | p.T44M   | tier1 | 26  | 0 | 0.000 | 308 | 135 | 0.304 |
| 147457 | 15 | 40583762  | 40583762  | C | T | SNP | PLCB2           | ENST00000558588 | -1 | 3_prime_untranslated_region | c.*205      | NULL     | tier2 | 16  | 0 | 0.000 | 63  | 39  | 0.382 |
| 147457 | 15 | 40993282  | 40993282  | C | T | SNP | RAD51           | ENST00000382643 | 1  | silent                      | c.108       | p.N36    | tier1 | 96  | 5 | 0.050 | 176 | 64  | 0.267 |
| 147457 | 15 | 44673070  | 44673070  | G | A | SNP | CASC4           | ENST00000299957 | 1  | missense                    | c.968       | p.R323H  | tier1 | 208 | 3 | 0.014 | 298 | 109 | 0.268 |
| 147457 | 15 | 52622645  | 52622645  | C | T | SNP | MYO5A           | ENST00000358212 | -1 | missense                    | c.4460      | p.R1487Q | tier1 | 146 | 0 | 0.000 | 252 | 77  | 0.234 |
| 147457 | 15 | 63964722  | 63964722  | G | A | SNP | HERC1           | ENST00000443617 | -1 | missense                    | c.8018      | p.P2673L | tier1 | 48  | 0 | 0.000 | 157 | 66  | 0.296 |
| 147457 | 15 | 64218300  | 64218300  | C | T | SNP | DAPK2           | ENST00000557867 | -1 | 5_prime_untranslated_region | c.-64218300 | NULL     | tier2 | 28  | 0 | 0.000 | 67  | 28  | 0.295 |
| 147457 | 15 | 66181422  | 66181422  | C | T | SNP | RAB11A          | ENST00000261890 | 1  | 3_prime_untranslated_region | c.*1244     | NULL     | tier3 | 72  | 0 | 0.000 | 91  | 35  | 0.273 |
| 147457 | 15 | 68480403  | 68480403  | A | - | DEL | PIAS1           | ENST00000563996 | 1  | 3_prime_untranslated_region | c.*474      | NULL     | tier4 | 22  | 0 | 0.000 | 47  | 24  | 0.338 |
| 147457 | 15 | 68603671  | 68603671  | C | T | SNP |                 |                 |    |                             |             |          |       |     |   |       |     |     |       |

|        |    |           |           |   |         |     |                        |                 |     |                             |                 |          |       |     |   |       |      |     |       |
|--------|----|-----------|-----------|---|---------|-----|------------------------|-----------------|-----|-----------------------------|-----------------|----------|-------|-----|---|-------|------|-----|-------|
| 147457 | 15 | 83931848  | 83931848  | G | A       | SNP | <i>BNC1</i>            | ENST00000345382 | -1  | missense                    | c.2155          | p.R719C  | tier1 | 58  | 1 | 0.017 | 128  | 54  | 0.297 |
| 147457 | 15 | 85805937  | 85805937  | C | T       | SNP | <i>ENSG00000218052</i> | ENST00000561209 | -1  | 5_prime_untranslated_region | c.-85805937     | NULL     | tier3 | 30  | 1 | 0.032 | 269  | 131 | 0.328 |
| 147457 | 15 | 90192982  | 90192982  | G | A       | SNP | <i>KIF7</i>            | ENST00000394412 | -1  | silent                      | c.519           | p.R173   | tier1 | 18  | 0 | 0.000 | 62   | 43  | 0.410 |
| 147457 | 15 | 90631934  | 90631934  | C | T       | SNP | <i>IDH2</i>            | ENST00000330062 | -1  | missense                    | c.419           | p.R140Q  | tier1 | 173 | 1 | 0.006 | 705  | 334 | 0.321 |
| 147457 | 15 | 91577490  | 91577490  | G | A       | SNP | <i>ENSG00000214432</i> | ENST00000557804 | 1   | intronic                    | c.NULL          | NULL     | tier3 | 84  | 0 | 0.000 | 322  | 152 | 0.321 |
| 147457 | 15 | 99512919  | 99512919  | C | T       | SNP | <i>PGPEP1L</i>         | ENST00000378919 | -1  | intronic                    | c.145-39        | e3-39    | tier3 | 27  | 0 | 0.000 | 181  | 82  | 0.311 |
| 147457 | 15 | 99671249  | 99671249  | C | T       | SNP | <i>SYNM</i>            | ENST00000336292 | 1   | missense                    | c.2681          | p.A894V  | tier1 | 38  | 0 | 0.000 | 184  | 66  | 0.264 |
| 147457 | 15 | 100821502 | 100821502 | C | T       | SNP | <i>ADAMTS17</i>        | ENST00000268070 | -1  | missense                    | c.721           | p.D241N  | tier1 | 78  | 0 | 0.000 | 381  | 175 | 0.314 |
| 147457 | 15 | 102292626 | 102292626 | G | A       | SNP | <i>ENSG00000259660</i> | ENST00000561463 | 1   | intronic                    | c.NULL          | NULL     | tier3 | 57  | 0 | 0.000 | 272  | 122 | 0.309 |
| 147457 | 16 | 593258    | 593258    | C | T       | SNP | <i>SOLH</i>            | ENST00000219611 | 1   | intronic                    | c.1-3559        | e1-3559  | tier3 | 31  | 0 | 0.000 | 317  | 152 | 0.324 |
| 147457 | 16 | 721798    | 721799    | - | CCCCCTG | INS | <i>MSLN</i>            | ENST00000446427 | 1   | intronic                    | c.1+28495_28496 | e0+28495 | tier4 | 19  | 0 | 0.000 | 84   | 33  | 0.282 |
| 147457 | 16 | 1255229   | 1255229   | C | T       | SNP | <i>CACNA1H</i>         | ENST00000348261 | 1   | missense                    | c.2567          | p.P856L  | tier1 | 47  | 0 | 0.000 | 170  | 78  | 0.312 |
| 147457 | 16 | 1397840   | 1397840   | C | T       | SNP | <i>BAIAP3</i>          | ENST00000324385 | 1   | intronic                    | c.3130+18       | e31+18   | tier2 | 25  | 0 | 0.000 | 161  | 88  | 0.352 |
| 147457 | 16 | 2129600   | 2129600   | G | A       | SNP | <i>TSC2</i>            | ENST00000219476 | 1   | silent                      | c.3327          | p.P1109  | tier1 | 26  | 1 | 0.037 | 318  | 145 | 0.313 |
| 147457 | 16 | 4431260   | 4431260   | C | T       | SNP | <i>VASN</i>            | ENST00000304735 | 1   | missense                    | c.382           | p.R128C  | tier1 | 28  | 0 | 0.000 | 182  | 74  | 0.289 |
| 147457 | 16 | 11001032  | 11001032  | C | T       | SNP | <i>CITA</i>            | ENST00000324288 | 1   | silent                      | c.1683          | p.D561   | tier1 | 27  | 0 | 0.000 | 161  | 62  | 0.276 |
| 147457 | 16 | 11121344  | 11121344  | G | A       | SNP | <i>ENSG00000229917</i> | ENST00000425129 | 1   | 3_prime_untranslated_region | c.*11121344     | NULL     | tier3 | 148 | 2 | 0.013 | 213  | 97  | 0.312 |
| 147457 | 16 | 15457736  | 15457736  | G | A       | SNP | <i>LOC642778</i>       | ENST00000360151 | -1  | missense                    | c.833           | p.A278V  | tier1 | 321 | 0 | 0.000 | 1467 | 151 | 0.093 |
| 147457 | 16 | 28914739  | 28914739  | C | T       | SNP | <i>ATP2A1</i>          | ENST00000564112 | 1   | missense                    | c.46            | p.R16C   | tier1 | 122 | 3 | 0.024 | 234  | 107 | 0.313 |
| 147457 | 16 | 31519174  | 31519174  | G | A       | SNP | <i>C16orf58</i>        | ENST00000327237 | -1  | missense                    | c.326           | p.S109F  | tier1 | 28  | 0 | 0.000 | 220  | 80  | 0.266 |
| 147457 | 16 | 33740957  | 33740957  | C | T       | SNP | <i>ENSG00000260781</i> | ENST00000567025 | -1  | 5_prime_flanking_region     | c.-1323         | NULL     | tier3 | 333 | 2 | 0.006 | 1132 | 225 | 0.166 |
| 147457 | 16 | 46638006  | 46638006  | G | A       | SNP | <i>SHCBP1</i>          | ENST00000303383 | -1  | missense                    | c.973           | p.R325C  | tier1 | 35  | 0 | 0.000 | 88   | 44  | 0.333 |
| 147457 | 16 | 56397961  | 56397961  | G | A       | SNP | <i>AMFR</i>            | ENST00000290649 | -1  | silent                      | c.1656          | p.G552   | tier1 | 22  | 0 | 0.000 | 97   | 53  | 0.353 |
| 147457 | 16 | 57752349  | 57752349  | G | A       | SNP | <i>CCDC135</i>         | ENST00000360716 | 1   | missense                    | c.1168          | p.D390N  | tier1 | 122 | 1 | 0.008 | 267  | 112 | 0.296 |
| 147457 | 16 | 58550812  | 58550812  | G | A       | SNP | <i>SETD6</i>           | ENST00000219315 | 1   | missense                    | c.772           | p.A258T  | tier1 | 59  | 0 | 0.000 | 161  | 54  | 0.251 |
| 147457 | 16 | 67469912  | 67469912  | G | A       | SNP | <i>HSD11B2</i>         | ENST00000326152 | 1   | silent                      | c.531           | p.A177   | tier1 | 29  | 0 | 0.000 | 138  | 60  | 0.303 |
| 147457 | 16 | 67573993  | 67573993  | G | A       | SNP | <i>FAM65A</i>          | ENST00000422602 | 1   | missense                    | c.512           | p.R171H  | tier1 | 94  | 2 | 0.021 | 491  | 217 | 0.307 |
| 147457 | 16 | 83378566  | 83378566  | C | T       | SNP | <i>CDH13</i>           | ENST00000566620 | 1   | missense                    | c.736           | p.R246W  | tier1 | 43  | 0 | 0.000 | 141  | 65  | 0.316 |
| 147457 | 16 | 83520057  | 83520057  | G | A       | SNP | <i>CDH13</i>           | ENST00000566620 | 1   | intronic                    | c.782-25        | e7-25    | tier3 | 77  | 1 | 0.013 | 198  | 51  | 0.204 |
| 147457 | 16 | 83994327  | 83994327  | G | A       | SNP | <i>OSGIN1</i>          | ENST00000361711 | 1   | missense                    | c.358           | p.V120M  | tier1 | 29  | 0 | 0.000 | 220  | 79  | 0.264 |
| 147457 | 16 | 84529437  | 84529437  | G | A       | SNP | <i>KIAA1609</i>        | ENST00000343629 | -1  | missense                    | c.236           | p.A79V   | tier1 | 25  | 0 | 0.000 | 106  | 46  | 0.301 |
| 147457 | 16 | 88747899  | 88747899  | G | A       | SNP | <i>SNAI3</i>           | ENST00000332281 | -1  | silent                      | c.300           | p.A100   | tier1 | 66  | 0 | 0.000 | 440  | 176 | 0.285 |
| 147457 | 16 | 89178494  | 89178494  | T | C       | SNP | <i>ACSF3</i>           | ENST00000317447 | 1   | splice_region               | c.823-6         | e3-6     | tier3 | 79  | 1 | 0.013 | 241  | 30  | 0.111 |
| 147457 | 17 | 3526660   | 3526660   | G | A       | SNP | <i>SHPK</i>            | ENST00000225519 | -1  | missense                    | c.620           | p.T207M  | tier1 | 21  | 0 | 0.000 | 159  | 78  | 0.329 |
| 147457 | 17 | 6377943   | 6377943   | G | A       | SNP | <i>PITPNM3</i>         | ENST00000262483 | -1  | intronic                    | c.1086-19       | e10-19   | tier2 | 15  | 0 | 0.000 | 251  | 122 | 0.277 |
| 147457 | 17 | 7492394   | 7492394   | G | A       | SNP | <i>MPDU1</i>           | ENST00000301597 | 1   | 3_prime_untranslated_region | c.*586          | NULL     | tier2 | 16  | 0 | 0.000 | 135  | 75  | 0.357 |
| 147457 | 17 | 7506344   | 7506344   | C | T       | SNP | <i>FXR2</i>            | ENST00000250113 | -1  | intronic                    | c.450-24        | e6-24    | tier2 | 91  | 0 | 0.000 | 107  | 58  | 0.352 |
| 147457 | 17 | 8216386   | 8216386   | C | T       | SNP | <i>ARHGEF15</i>        | ENST00000361926 | 1   | missense                    | c.748           | p.R250C  | tier1 | 26  | 0 | 0.000 | 306  | 120 | 0.281 |
| 147457 | 17 | 9632002   | 9632002   | G | A       | SNP | <i>USP43</i>           | ENST00000285199 | 1   | missense                    | c.3067          | p.V1023I | tier1 | 20  | 0 | 0.000 | 172  | 62  | 0.265 |
| 147457 | 17 | 10322056  | 10322056  | G | A       | SNP | <i>MYH8</i>            | ENST00000252173 | -1  | silent                      | c.417           | p.P139   | tier1 | 121 | 0 | 0.000 | 378  | 164 | 0.303 |
| 147457 | 17 | 10404747  | 10404747  | G | A       | SNP | <i>MYH1</i>            | ENST00000226207 | -1  | missense                    | c.3418          | p.R1140C | tier1 | 150 | 0 | 0.000 | 520  | 235 | 0.310 |
| 147457 | 17 | 11631100  | 11631100  | C | T       | SNP | <i>DNAH9</i>           | ENST00000262442 | 1   | intronic                    | c.5710-35       | e28-35   | tier2 | 123 | 5 | 0.039 | 306  | 124 | 0.288 |
| 147457 | 17 | 16330812  | 16330812  | C | T       | SNP | <i>TRPV2</i>           | ENST00000338560 | 1   | missense                    | c.1301          | p.T434M  | tier1 | 32  | 0 | 0.000 | 186  | 85  | 0.314 |
| 147457 | 17 | 16344404  | 16344404  | G | A       | SNP | <i>C17orf76-AS1</i>    | ENST00000460249 | 1   | 3_prime_untranslated_region | c.*16344404     | NULL     | tier2 | 79  | 0 | 0.000 | 206  | 81  | 0.281 |
| 147457 | 17 | 16981370  | 16981370  | C | T       | SNP | <i>MPRIP</i>           | ENST00000395811 | 1   | missense                    | c.247           | p.R83C   | tier1 | 38  | 0 | 0.000 | 168  | 78  | 0.317 |
| 147457 | 17 | 18149237  | 18149237  | C | T       | SNP | <i>FLII</i>            | ENST00000465046 | -1  | 5_prime_untranslated_region | c.-18149237     | NULL     | tier4 | 21  | 0 | 0.000 | 186  | 83  | 0.307 |
| 147457 | 17 | 18996977  | 18996977  | T | G       | SNP | <i>LOC100132472</i>    | ENST00000428928 | 1   | missense                    | c.315           | p.S105R  | tier1 | 49  | 1 | 0.020 | 537  | 220 | 0.291 |
| 147457 | 17 | 19315938  | 19315938  | G | A       | SNP | <i>RNF112</i>          | ENST00000453070 | 1   | missense                    | c.79            | p.D27N   | tier1 | 14  | 0 | 0.000 | 110  | 69  | 0.386 |
| 147457 | 17 | 26574933  | 26574933  | G | A       | SNP | <i>ENSG00000197825</i> | ENST00000355177 | -1  | 5_prime_flanking_region     | c.-44102        | NULL     | tier2 | 23  | 0 | 0.000 | 101  | 56  | 0.357 |
| 147457 | 17 | 26817411  | 26817411  | C | T       | SNP | <i>SLC13A2</i>         | ENST00000444914 | 1   | silent                      | c.318           | p.L106   | tier1 | 50  | 0 | 0.000 | 172  | 79  | 0.312 |
| 147457 | 17 | 27013676  | 27013676  | G | A       | SNP | <i>SUPT6H</i>          | ENST00000314616 | 1   | missense                    | c.2569          | p.A857T  | tier1 | 47  | 1 | 0.021 | 171  | 59  | 0.257 |
| 147457 | 17 | 28395764  | 28395764  | C | T       | SNP | <i>EFCAB5</i>          | ENST00000394835 | 1   | intronic                    | c.2737+9045     | e14+9045 | tier2 | 51  | 0 | 0.000 | 212  | 90  | 0.298 |
| 147457 | 17 | 29533403  | 29533403  | C | T       | SNP | <i>NF1</i>             | ENST00000358273 | 1   | intronic                    | c.1392+14       | e12+14   | tier2 | 184 | 8 | 0.042 | 395  | 168 | 0.298 |
| 147457 | 17 | 31320043  | 31320043  | C | T       | SNP | <i>SPACA3</i>          | ENST00000269053 | 1   | intronic                    | c.34+1053       | e1+1053  | tier2 | 81  | 1 | 0.012 | 301  | 103 | 0.254 |
| 147457 | 17 | 33328217  | 33328217  | G | A       | SNP | <i>LIG3</i>            | ENST00000378526 | 1   | intronic                    | c.2332-59       | e16-59   | tier4 | 23  | 0 | 0.000 | 78   | 30  | 0.278 |
| 147457 | 17 | 34312816  | 34312816  | G | A       | SNP | <i>CCL14</i>           | ENST00000435911 | -1  | missense                    | c.95            | p.P32L   | tier1 | 87  | 2 | 0.023 | 184  | 67  | 0.267 |
| 147457 | 17 | 36622583  | 36622583  | G | A       | SNP | <i>ARHGAP23</i>        | ENST00000431231 | 1   | missense                    | c.659           | p.R220Q  | tier1 | 38  | 0 | 0.000 | 344  | 161 | 0.318 |
| 147457 | 17 | 36689701  | 36689701  | G | A       | SNP | <i>SRCIN1</i>          | ENST00000264659 | -1  | intronic                    | c.3418-35       | e19-35   | tier2 | 20  | 0 | 0.000 | 217  | 141 | 0.394 |
| 147457 | 17 | 37075080  | 37075080  | C | T       | SNP | <i>LASP1</i>           | ENST00000318008 | 1   | 3_prime_untranslated_region | c.*49           | NULL     | tier2 | 33  | 0 | 0.000 | 150  | 58  | 0.279 |
| 147457 | 17 | 38146349  | 38146349  | C | T       | SNP | <i>PSMD3</i>           | ENST00000264639 | 1   | nonsense                    | c.880           | p.R294*  | tier1 | 49  | 1 | 0.020 | 224  | 86  | 0.277 |
| 147457 | 17 | 39740595  | 39740595  | C | T       | SNP | <i>KRT14</i>           | ENST00000167586 | -1  | missense                    | c.679           | p.E227K  | tier1 | 116 | 3 | 0.025 | 419  | 156 | 0.271 |
| 147457 | 17 | 39959603  | 39959603  | G | A       | SNP | <i>LEPREL4</i>         | ENST00000465097 | -1  | missense                    | c.134           | p.T45M   | tier1 | 26  | 0 | 0.000 | 162  | 69  | 0.299 |
| 147457 | 17 | 40063711  | 40063711  | C | T       | SNP | <i>ACLY</i>            | ENST00000401700 | -1  | missense                    | c.893           | p.R298Q  | tier1 | 32  | 0 | 0.000 | 201  | 111 | 0.356 |
| 147457 | 17 | 41026210  | 41026210  | C | T       | SNP | <i>ENSG00000260105</i> | ENST00000570207 | 1   | 3_prime_untranslated_region | c.*41026210     | NULL     | tier2 | 109 | 0 | 0.000 | 322  | 106 | 0.247 |
| 147457 | 17 | 44144025  | 44144025  | G | A       | SNP | <i>KANSL1</i>          | ENST00000262419 | -1  | nonsense                    | c.1726          | p.R576*  | tier1 | 196 | 2 | 0.010 | 616  | 273 | 0.307 |
| 147457 | 17 | 48434597  | 48434597  | G | A       | SNP | <i>XYLT2</i>           | ENST00000017003 | 1   | missense                    | c.1925          | p.R642Q  | tier1 | 39  | 0 | 0.000 | 380  | 161 | 0.296 |
| 147457 | 17 | 52993020  | 52993020  | C | T       | SNP | <i>TOM1L1</i>          | ENST00000575882 | 1</ |                             |                 |          |       |     |   |       |      |     |       |

|        |    |          |          |   |   |     |           |                 |    |                             |             |          |       |     |   |       |     |     |       |
|--------|----|----------|----------|---|---|-----|-----------|-----------------|----|-----------------------------|-------------|----------|-------|-----|---|-------|-----|-----|-------|
| 147457 | 17 | 76167847 | 76167847 | C | T | SNP | SYNGR2    | ENST00000225777 | 1  | missense                    | c.505       | p.R169C  | tier1 | 18  | 0 | 0.000 | 148 | 53  | 0.264 |
| 147457 | 17 | 76803689 | 76803689 | C | T | SNP | USP36     | ENST00000312010 | -1 | silent                      | c.1437      | p.P479   | tier1 | 14  | 0 | 0.000 | 54  | 31  | 0.365 |
| 147457 | 17 | 77081692 | 77081692 | C | T | SNP | ENGASE    | ENST00000300682 | 1  | splice_region               | c.1701-10   | e13-10   | tier3 | 18  | 0 | 0.000 | 101 | 41  | 0.289 |
| 147457 | 17 | 77083117 | 77083117 | G | A | SNP | ENGASE    | ENST00000300682 | 1  | 3_prime_untranslated_region | c.*686      | NULL     | tier3 | 24  | 1 | 0.040 | 175 | 90  | 0.340 |
| 147457 | 17 | 78247071 | 78247071 | G | A | SNP | RNF213    | ENST00000508628 | 1  | silent                      | c.129       | p.S43    | tier1 | 281 | 6 | 0.021 | 830 | 332 | 0.285 |
| 147457 | 18 | 5397381  | 5397381  | G | A | SNP | EPB41L3   | ENST00000341928 | -1 | silent                      | c.2517      | p.P839   | tier1 | 27  | 0 | 0.000 | 95  | 42  | 0.302 |
| 147457 | 18 | 6837314  | 6837314  | C | T | SNP | ARHGAP28  | ENST00000400091 | 1  | silent                      | c.444       | p.A148   | tier1 | 89  | 0 | 0.000 | 243 | 88  | 0.265 |
| 147457 | 18 | 11868565 | 11868565 | G | A | SNP | GNAL      | ENST00000334049 | 1  | missense                    | c.934       | p.A312T  | tier1 | 67  | 1 | 0.015 | 168 | 62  | 0.268 |
| 147457 | 18 | 13072806 | 13072806 | C | T | SNP | CEP192    | ENST00000506447 | 1  | nonsense                    | c.5401      | p.R1801* | tier1 | 166 | 2 | 0.012 | 197 | 98  | 0.332 |
| 147457 | 18 | 19024347 | 19024347 | C | T | SNP | GREB1L    | ENST00000424526 | 1  | missense                    | c.1370      | p.T457M  | tier1 | 129 | 0 | 0.000 | 231 | 78  | 0.252 |
| 147457 | 18 | 19780629 | 19780629 | C | T | SNP | GATA6     | ENST00000269216 | 1  | missense                    | c.1631      | p.P544L  | tier1 | 54  | 1 | 0.018 | 178 | 98  | 0.355 |
| 147457 | 18 | 24126926 | 24126926 | G | A | SNP | KCTD1     | ENST00000417602 | -1 | silent                      | c.1575      | p.D525   | tier1 | 20  | 0 | 0.000 | 97  | 43  | 0.307 |
| 147457 | 18 | 29046693 | 29046693 | G | A | SNP | DSG3      | ENST00000257189 | 1  | missense                    | c.1612      | p.V538I  | tier1 | 53  | 3 | 0.054 | 124 | 48  | 0.278 |
| 147457 | 18 | 33605730 | 33605730 | G | A | SNP | RPRD1A    | ENST00000357384 | -1 | intronic                    | c.789+1133  | e6+1133  | tier2 | 71  | 0 | 0.000 | 138 | 55  | 0.285 |
| 147457 | 18 | 34340699 | 34340699 | C | T | SNP | FHOD3     | ENST00000257209 | 1  | silent                      | c.4029      | p.D1343  | tier1 | 28  | 0 | 0.000 | 145 | 59  | 0.288 |
| 147457 | 18 | 47527556 | 47527556 | C | T | SNP | MYO5B     | ENST00000285039 | -1 | intronic                    | c.612+69    | e5+69    | tier2 | 75  | 0 | 0.000 | 498 | 212 | 0.298 |
| 147457 | 19 | 648900   | 648900   | C | T | SNP | RNF126    | ENST00000340092 | -1 | missense                    | c.652       | p.V218I  | tier1 | 94  | 2 | 0.021 | 333 | 185 | 0.357 |
| 147457 | 19 | 806592   | 806592   | C | T | SNP | PTBP1     | ENST00000356948 | 1  | intronic                    | c.1119+36   | e10+36   | tier2 | 56  | 0 | 0.000 | 187 | 100 | 0.347 |
| 147457 | 19 | 1046266  | 1046266  | G | A | SNP | ABCA7     | ENST00000263094 | 1  | missense                    | c.1483      | p.D495N  | tier1 | 53  | 0 | 0.000 | 472 | 164 | 0.257 |
| 147457 | 19 | 3976654  | 3976654  | G | A | SNP | EEF2      | ENST00000309311 | -1 | silent                      | c.2475      | p.F825   | tier1 | 37  | 0 | 0.000 | 342 | 124 | 0.264 |
| 147457 | 19 | 4491450  | 4491450  | C | T | SNP | HDFFRP2   | ENST00000301284 | 1  | intronic                    | c.490-113   | e5-113   | tier3 | 25  | 0 | 0.000 | 132 | 59  | 0.309 |
| 147457 | 19 | 4511513  | 4511513  | G | A | SNP | PLIN4     | ENST00000301286 | -1 | missense                    | c.2417      | p.T806M  | tier1 | 54  | 0 | 0.000 | 368 | 48  | 0.115 |
| 147457 | 19 | 4930798  | 4930798  | C | T | SNP | UHRF1     | ENST00000398240 | 1  | missense                    | c.518       | p.T173M  | tier1 | 29  | 0 | 0.000 | 169 | 62  | 0.268 |
| 147457 | 19 | 7267653  | 7267653  | C | T | SNP | INSR      | ENST00000302850 | -1 | missense                    | c.355       | p.A119T  | tier1 | 24  | 0 | 0.000 | 90  | 35  | 0.280 |
| 147457 | 19 | 7620282  | 7620282  | G | A | SNP | PNPLA6    | ENST00000414982 | 1  | intronic                    | c.2966+29   | e24+29   | tier2 | 12  | 0 | 0.000 | 68  | 43  | 0.387 |
| 147457 | 19 | 8027941  | 8027941  | C | T | SNP | ELAVL1    | ENST00000407627 | -1 | 3_prime_untranslated_region | c.*426      | NULL     | tier3 | 75  | 3 | 0.039 | 147 | 66  | 0.310 |
| 147457 | 19 | 8138001  | 8138001  | G | A | SNP | FBN3      | ENST00000270509 | -1 | missense                    | c.7883      | p.T2628M | tier1 | 39  | 0 | 0.000 | 283 | 123 | 0.303 |
| 147457 | 19 | 8191296  | 8191296  | C | T | SNP | FBN3      | ENST00000270509 | -1 | intronic                    | c.2554+56   | e19+56   | tier3 | 39  | 1 | 0.025 | 367 | 147 | 0.285 |
| 147457 | 19 | 8617070  | 8617070  | C | T | SNP | MYO1F     | ENST00000338257 | -1 | intronic                    | c.505-22    | e7-22    | tier3 | 32  | 0 | 0.000 | 111 | 39  | 0.258 |
| 147457 | 19 | 10099957 | 10099957 | G | A | SNP | COL5A3    | ENST00000264828 | -1 | intronic                    | c.2091+41   | e26+41   | tier3 | 109 | 2 | 0.018 | 460 | 190 | 0.292 |
| 147457 | 19 | 10753529 | 10753529 | C | T | SNP | SLC44A2   | ENST00000335757 | 1  | intronic                    | c.2014+402  | e21+402  | tier2 | 47  | 1 | 0.021 | 190 | 67  | 0.260 |
| 147457 | 19 | 13007031 | 13007031 | G | A | SNP | GCDH      | ENST00000222214 | 1  | silent                      | c.648       | p.S216   | tier1 | 66  | 1 | 0.015 | 305 | 119 | 0.280 |
| 147457 | 19 | 13409955 | 13409955 | C | T | SNP | CACNA1A   | ENST00000418012 | -1 | missense                    | c.2504      | p.R835H  | tier1 | 89  | 4 | 0.043 | 413 | 140 | 0.253 |
| 147457 | 19 | 13441256 | 13441256 | C | T | SNP | CACNA1A   | ENST00000418012 | -1 | intronic                    | c.1256-106  | e10-106  | tier4 | 41  | 0 | 0.000 | 75  | 29  | 0.279 |
| 147457 | 19 | 13930271 | 13930271 | G | A | SNP | ZSWIM4    | ENST00000254323 | 1  | silent                      | c.1674      | p.F558   | tier1 | 36  | 0 | 0.000 | 270 | 111 | 0.291 |
| 147457 | 19 | 14071785 | 14071785 | G | A | SNP | DCAF15    | ENST00000254337 | 1  | missense                    | c.1781      | p.R594Q  | tier1 | 22  | 0 | 0.000 | 213 | 92  | 0.302 |
| 147457 | 19 | 14211653 | 14211653 | C | T | SNP | PRKACA    | ENST00000308677 | -1 | missense                    | c.404       | p.R135Q  | tier1 | 26  | 0 | 0.000 | 136 | 58  | 0.299 |
| 147457 | 19 | 14218255 | 14218255 | C | T | SNP | PRKACA    | ENST00000308677 | -1 | intronic                    | c.47-34     | e2-34    | tier3 | 105 | 1 | 0.009 | 172 | 91  | 0.346 |
| 147457 | 19 | 15760007 | 15760007 | G | A | SNP | CYP4F3    | ENST00000221307 | 1  | missense                    | c.563       | p.R188H  | tier1 | 97  | 0 | 0.000 | 344 | 143 | 0.293 |
| 147457 | 19 | 16855367 | 16855367 | G | A | SNP | NWD1      | ENST00000379808 | 1  | missense                    | c.334       | p.E112K  | tier1 | 39  | 0 | 0.000 | 180 | 96  | 0.348 |
| 147457 | 19 | 17893967 | 17893967 | C | T | SNP | FCHO1     | ENST00000252771 | 1  | silent                      | c.2079      | p.A693   | tier1 | 32  | 1 | 0.030 | 124 | 50  | 0.287 |
| 147457 | 19 | 20308488 | 20308488 | G | A | SNP | ZNF486    | ENST00000335117 | 1  | silent                      | c.969       | p.T323   | tier1 | 133 | 2 | 0.015 | 219 | 96  | 0.304 |
| 147457 | 19 | 23927554 | 23927554 | C | T | SNP | ZNF681    | ENST00000402377 | -1 | silent                      | c.798       | p.S266   | tier1 | 107 | 1 | 0.009 | 209 | 56  | 0.211 |
| 147457 | 19 | 33487078 | 33487078 | C | T | SNP | RHPN2     | ENST00000254260 | -1 | missense                    | c.1274      | p.R425Q  | tier1 | 27  | 0 | 0.000 | 153 | 66  | 0.301 |
| 147457 | 19 | 34925778 | 34925778 | C | T | SNP | UBA2      | ENST00000246548 | 1  | nonsense                    | c.364       | p.R122*  | tier1 | 89  | 0 | 0.000 | 195 | 69  | 0.260 |
| 147457 | 19 | 38954130 | 38954130 | C | T | SNP | RYR1      | ENST00000359596 | 1  | missense                    | c.2645      | p.A882V  | tier1 | 131 | 0 | 0.000 | 670 | 240 | 0.263 |
| 147457 | 19 | 40398322 | 40398322 | G | A | SNP | FCGBP     | ENST00000221347 | -1 | silent                      | c.6645      | p.N2215  | tier1 | 170 | 1 | 0.006 | 770 | 207 | 0.212 |
| 147457 | 19 | 42091848 | 42091848 | G | A | SNP | CEACAM21  | ENST00000401445 | 1  | missense                    | c.850       | p.G284S  | tier1 | 49  | 0 | 0.000 | 169 | 75  | 0.305 |
| 147457 | 19 | 42525580 | 42525580 | G | A | SNP | GRIK5     | ENST00000301218 | -1 | missense                    | c.1744      | p.R582C  | tier1 | 72  | 0 | 0.000 | 332 | 120 | 0.266 |
| 147457 | 19 | 44891009 | 44891009 | C | T | SNP | ZFP112    | ENST00000330997 | -1 | silent                      | c.1398      | p.A466   | tier1 | 112 | 1 | 0.009 | 247 | 109 | 0.306 |
| 147457 | 19 | 47910756 | 47910756 | C | T | SNP | MEIS3     | ENST00000559524 | -1 | missense                    | c.926       | p.R309Q  | tier1 | 23  | 0 | 0.000 | 228 | 84  | 0.269 |
| 147457 | 19 | 48956016 | 48956016 | G | A | SNP | GRWD1     | ENST00000253237 | 1  | missense                    | c.1075      | p.V359I  | tier1 | 34  | 0 | 0.000 | 248 | 94  | 0.275 |
| 147457 | 19 | 49113254 | 49113254 | C | T | SNP | FAM83E    | ENST00000263266 | -1 | missense                    | c.637       | p.V213M  | tier1 | 30  | 1 | 0.032 | 168 | 72  | 0.300 |
| 147457 | 19 | 49526129 | 49526129 | G | A | SNP | CGB       | ENST00000357383 | -1 | 3_prime_untranslated_region | c.*14       | NULL     | tier2 | 34  | 0 | 0.000 | 185 | 95  | 0.339 |
| 147457 | 19 | 50563467 | 50563467 | C | T | SNP | FLJ26850  | ENST00000527209 | 1  | intronic                    | c.NULL      | NULL     | tier3 | 60  | 0 | 0.000 | 95  | 38  | 0.286 |
| 147457 | 19 | 51128500 | 51128500 | G | A | SNP | SYT3      | ENST00000338916 | -1 | silent                      | c.1626      | p.A542   | tier1 | 36  | 0 | 0.000 | 240 | 137 | 0.363 |
| 147457 | 19 | 53208386 | 53208386 | C | T | SNP | ZNF611    | ENST00000319783 | -1 | missense                    | c.1922      | p.R641H  | tier1 | 173 | 2 | 0.011 | 393 | 153 | 0.280 |
| 147457 | 19 | 54204449 | 54204449 | C | T | SNP | MIR521-2  | ENST00000384818 | 1  | 5_prime_flanking_region     | c.-15399    | NULL     | tier3 | 114 | 5 | 0.042 | 310 | 111 | 0.264 |
| 147457 | 19 | 54760964 | 54760964 | C | T | SNP | LILRB5    | ENST00000463460 | -1 | 5_prime_untranslated_region | c.-54760964 | NULL     | tier3 | 32  | 0 | 0.000 | 191 | 83  | 0.303 |
| 147457 | 19 | 55710221 | 55710221 | G | A | SNP | PTPRH     | ENST00000376350 | -1 | missense                    | c.1480      | p.R494C  | tier1 | 29  | 0 | 0.000 | 207 | 95  | 0.315 |
| 147457 | 19 | 55870015 | 55870015 | G | A | SNP | FAM71E2   | ENST00000424985 | -1 | missense                    | c.2221      | p.R741C  | tier1 | 37  | 0 | 0.000 | 150 | 70  | 0.318 |
| 147457 | 19 | 55943894 | 55943894 | G | A | SNP | SHISA7    | ENST00000376325 | -1 | 3_prime_untranslated_region | c.*629      | NULL     | tier3 | 44  | 0 | 0.000 | 118 | 44  | 0.272 |
| 147457 | 19 | 57133465 | 57133465 | C | T | SNP | ZNF71     | ENST00000328070 | 1  | silent                      | c.810       | p.Y270   | tier1 | 32  | 0 | 0.000 | 311 | 142 | 0.313 |
| 147457 | 19 | 59061551 | 59061551 | G | A | SNP | TRIM28    | ENST00000253024 | 1  | missense                    | c.2231      | p.R744H  | tier1 | 17  | 0 | 0.000 | 120 | 54  | 0.310 |
| 147457 | 20 | 2842746  | 2842746  | G | A | SNP | VPS16     | ENST00000380445 | 1  | silent                      | c.1041      | p.A347   | tier1 | 49  | 0 | 0.000 | 176 | 64  | 0.266 |
| 147457 | 20 | 3147452  | 3147452  | C | T | SNP | ProSAPIP1 | ENST00000329152 | -1 | missense                    | c.358       | p.G120R  | tier1 | 21  | 0 | 0.000 | 111 | 53  | 0.321 |
| 147457 | 20 | 4705892  | 4705892  | C | T | SNP | PRND      | ENST00000305817 | 1  | 3_prime_untranslated_region | c.*164      | NULL     | tier3 | 31  | 0 | 0.000 | 114 | 58  | 0.337 |
| 147457 | 20 | 4707604  | 4707604  | G | A | SNP | PRND      | ENST00000305817 | 1  | 3_prime_untranslated_region | c.*1876     | NULL     | tier3 | 63  | 3 | 0.046 | 132 | 62  | 0.318 |
| 147457 | 20 | 18805846 | 18805846 | C | T | SNP | C20orf78  | ENST00000278779 | -1 | intronic                    | c.116+64    | e2+64    |       |     |   |       |     |     |       |

|        |    |           |           |   |   |     |                 |                 |    |                             |                 |          |       |     |    |       |     |     |       |
|--------|----|-----------|-----------|---|---|-----|-----------------|-----------------|----|-----------------------------|-----------------|----------|-------|-----|----|-------|-----|-----|-------|
| 147457 | 20 | 40118424  | 40118424  | G | A | SNP | CHD6            | ENST00000440697 | -1 | missense                    | c.782           | p.T261M  | tier1 | 45  | 0  | 0.000 | 187 | 80  | 0.300 |
| 147457 | 20 | 40122259  | 40122259  | C | T | SNP | CHD6            | ENST00000440697 | -1 | missense                    | c.341           | p.R114H  | tier1 | 74  | 0  | 0.000 | 118 | 46  | 0.281 |
| 147457 | 20 | 44050134  | 44050134  | C | T | SNP | PIGT            | ENST00000279036 | 1  | missense                    | c.1145          | p.P382L  | tier1 | 22  | 0  | 0.000 | 100 | 44  | 0.306 |
| 147457 | 20 | 49620923  | 49620923  | C | T | SNP | KCNG1           | ENST00000371571 | -1 | missense                    | c.1195          | p.E399K  | tier1 | 30  | 0  | 0.000 | 189 | 72  | 0.275 |
| 147457 | 20 | 53208320  | 53208320  | C | T | SNP | DOK5            | ENST00000262593 | 1  | missense                    | c.575           | p.T192M  | tier1 | 154 | 2  | 0.013 | 245 | 133 | 0.352 |
| 147457 | 20 | 60704165  | 60704165  | G | A | SNP | LSM14B          | ENST00000253001 | 1  | intronic                    | c.661-1175      | e5-1175  | tier3 | 41  | 0  | 0.000 | 141 | 76  | 0.347 |
| 147457 | 20 | 60910153  | 60910153  | G | A | SNP | LAMA5           | ENST00000252999 | -1 | silent                      | c.2406          | p.H802   | tier1 | 25  | 0  | 0.000 | 303 | 132 | 0.303 |
| 147457 | 20 | 62037970  | 62037970  | G | A | SNP | KCNQ2           | ENST00000354587 | -1 | 3_prime_untranslated_region | c.*27           | NULL     | tier2 | 35  | 0  | 0.000 | 177 | 59  | 0.250 |
| 147457 | 20 | 62055538  | 62055538  | C | T | SNP | KCNQ2           | ENST00000354587 | -1 | silent                      | c.1209          | p.P403   | tier1 | 82  | 2  | 0.024 | 387 | 162 | 0.295 |
| 147457 | 21 | 31744090  | 31744090  | G | A | SNP | KRTAP13-2       | ENST00000399889 | -1 | missense                    | c.442           | p.R148C  | tier1 | 52  | 1  | 0.019 | 156 | 78  | 0.333 |
| 147457 | 21 | 33318470  | 33318470  | G | A | SNP | HUNK            | ENST00000270112 | 1  | missense                    | c.733           | p.D245N  | tier1 | 54  | 0  | 0.000 | 136 | 58  | 0.297 |
| 147457 | 21 | 33696887  | 33696887  | C | T | SNP | URB1            | ENST00000382751 | -1 | missense                    | c.5147          | p.R1716Q | tier1 | 104 | 1  | 0.010 | 249 | 111 | 0.308 |
| 147457 | 21 | 34945659  | 34945659  | G | A | SNP | SON             | ENST00000356577 | 1  | missense                    | c.6931          | p.V2311I | tier1 | 160 | 2  | 0.012 | 270 | 87  | 0.243 |
| 147457 | 21 | 36206893  | 36206893  | G | A | SNP | RUNX1           | ENST00000300305 | -1 | missense                    | c.619           | p.R207W  | tier1 | 134 | 1  | 0.007 | 755 | 326 | 0.301 |
| 147457 | 21 | 43547924  | 43547924  | G | A | SNP | UMODL1          | ENST00000408989 | 1  | missense                    | c.4057          | p.G1353R | tier1 | 113 | 0  | 0.000 | 200 | 91  | 0.313 |
| 147457 | 21 | 43984766  | 43984766  | G | A | SNP | SLC37A1         | ENST00000352133 | 1  | intronic                    | c.1136-52       | e13-52   | tier3 | 16  | 0  | 0.000 | 168 | 75  | 0.309 |
| 147457 | 21 | 46363698  | 46363698  | G | A | SNP | FAM207A         | ENST00000291634 | 1  | missense                    | c.229           | p.V77I   | tier1 | 34  | 0  | 0.000 | 160 | 74  | 0.315 |
| 147457 | 21 | 47766132  | 47766132  | C | T | SNP | PCNT            | ENST00000359568 | 1  | splice_region               | c.720+10        | e4+10    | tier3 | 43  | 1  | 0.023 | 149 | 59  | 0.282 |
| 147457 | 22 | 21022153  | 21022153  | G | A | SNP | FAM108A5P       | ENST00000411545 | -1 | 5_prime_untranslated_region | c.-21022153     | NULL     | tier2 | 34  | 0  | 0.000 | 424 | 172 | 0.289 |
| 147457 | 22 | 21349265  | 21349265  | G | A | SNP | LZTR1           | ENST00000215739 | 1  | missense                    | c.1892          | p.R631Q  | tier1 | 37  | 0  | 0.000 | 264 | 118 | 0.308 |
| 147457 | 22 | 23077532  | 23077532  | C | T | SNP | IGLV2-18        | ENST00000390310 | 1  | silent                      | c.309           | p.D103   | tier1 | 37  | 0  | 0.000 | 233 | 89  | 0.276 |
| 147457 | 22 | 24649098  | 24649098  | G | A | SNP | POM121L9P       | ENST00000414583 | 1  | 3_prime_untranslated_region | c.*24649098     | NULL     | tier3 | 88  | 0  | 0.000 | 551 | 256 | 0.317 |
| 147457 | 22 | 25598652  | 25598652  | C | T | SNP | CRYBB3          | ENST00000215855 | 1  | silent                      | c.87            | p.Y29    | tier1 | 49  | 0  | 0.000 | 172 | 54  | 0.239 |
| 147457 | 22 | 37319436  | 37319436  | C | T | SNP | CSF2RB          | ENST00000262825 | 1  | intronic                    | c.200+27        | e2+27    | tier3 | 17  | 0  | 0.000 | 134 | 89  | 0.399 |
| 147457 | 22 | 37892522  | 37892522  | C | T | SNP | CARD10          | ENST00000251973 | -1 | missense                    | c.1993          | p.E665K  | tier1 | 15  | 0  | 0.000 | 114 | 62  | 0.352 |
| 147457 | 22 | 38062929  | 38062929  | G | A | SNP | PDXP            | ENST00000215904 | 1  | 3_prime_untranslated_region | c.*1051         | NULL     | tier2 | 97  | 3  | 0.030 | 148 | 61  | 0.292 |
| 147457 | 22 | 39358204  | 39358204  | C | T | SNP | APOBEC3A        | ENST00000249116 | 1  | missense                    | c.571           | p.R191W  | tier1 | 34  | 0  | 0.000 | 178 | 80  | 0.309 |
| 147457 | 22 | 46125385  | 46125385  | A | A | SNP | ATXN10          | ENST00000252934 | 1  | missense                    | c.809           | p.R270Q  | tier1 | 67  | 2  | 0.029 | 152 | 62  | 0.290 |
| 147457 | 22 | 50728653  | 50728653  | C | T | SNP | PLXNB2          | ENST00000359337 | -1 | missense                    | c.361           | p.A121T  | tier1 | 22  | 0  | 0.000 | 186 | 83  | 0.309 |
| 147457 | 22 | 50900128  | 50900128  | C | T | SNP | SBF1            | ENST00000337034 | -1 | missense                    | c.2693          | p.R898H  | tier1 | 50  | 0  | 0.000 | 291 | 131 | 0.309 |
| 147457 | 22 | 50962222  | 50962222  | C | T | SNP | SCO2            | ENST00000252785 | -1 | missense                    | c.619           | p.V207M  | tier1 | 48  | 2  | 0.040 | 206 | 80  | 0.280 |
| 147457 | 22 | 51182575  | 51182575  | C | T | SNP | ACR             | ENST00000216139 | 1  | missense                    | c.652           | p.R218C  | tier1 | 59  | 2  | 0.033 | 273 | 109 | 0.285 |
| 147457 | X  | 2406917   | 2406917   | C | T | SNP | ZBED1           | ENST00000381218 | -1 | missense                    | c.1844          | p.R615H  | tier1 | 41  | 0  | 0.000 | 282 | 118 | 0.293 |
| 147457 | X  | 13765025  | 13765025  | G | A | SNP | OFD1            | ENST00000340096 | 1  | missense                    | c.781           | p.V261I  | tier1 | 293 | 4  | 0.014 | 415 | 190 | 0.312 |
| 147457 | X  | 20070889  | 20070889  | C | T | SNP | MAP7D2          | ENST00000379643 | -1 | intronic                    | c.595+107       | e5+107   | tier3 | 67  | 0  | 0.000 | 144 | 58  | 0.283 |
| 147457 | X  | 29973688  | 29973688  | G | A | SNP | IL1RAPL1        | ENST00000302196 | 1  | silent                      | c.1842          | p.T614   | tier1 | 98  | 2  | 0.020 | 185 | 80  | 0.302 |
| 147457 | X  | 29974566  | 29974566  | G | A | SNP | IL1RAPL1        | ENST00000378993 | 1  | 3_prime_untranslated_region | c.*629          | NULL     | tier3 | 154 | 1  | 0.007 | 371 | 139 | 0.272 |
| 147457 | X  | 34961163  | 34961163  | G | A | SNP | FAM47B          | ENST00000329357 | 1  | missense                    | c.215           | p.R72H   | tier1 | 183 | 4  | 0.021 | 504 | 240 | 0.323 |
| 147457 | X  | 41530801  | 41530801  | C | T | SNP | CASK            | ENST00000378163 | -1 | intronic                    | c.430-18        | e6-18    | tier4 | 231 | 4  | 0.017 | 520 | 212 | 0.289 |
| 147457 | X  | 49032048  | 49032048  | G | A | SNP | PRICKLE3        | ENST00000376317 | -1 | nonsense                    | c.1822          | p.R608*  | tier1 | 47  | 2  | 0.041 | 326 | 129 | 0.283 |
| 147457 | X  | 51639618  | 51639618  | C | T | SNP | MAGED1          | ENST00000375695 | 1  | silent                      | c.1035          | p.G345   | tier1 | 35  | 0  | 0.000 | 340 | 138 | 0.288 |
| 147457 | X  | 69595890  | 69595890  | C | T | SNP | KIF4A           | ENST00000374403 | 1  | intronic                    | c.1924-60       | e17-60   | tier3 | 103 | 0  | 0.000 | 153 | 47  | 0.233 |
| 147457 | X  | 70823895  | 70823895  | C | T | SNP | ACRC            | ENST00000373695 | 1  | silent                      | c.768           | p.D256Q  | tier1 | 121 | 1  | 0.008 | 363 | 118 | 0.244 |
| 147457 | X  | 70836264  | 70836264  | C | T | SNP | XCRCR3          | ENST00000373691 | -1 | missense                    | c.1199          | p.R400Q  | tier1 | 30  | 1  | 0.032 | 278 | 116 | 0.292 |
| 147457 | X  | 71427464  | 71427464  | C | A | SNP | ERCC6L          | ENST00000334463 | -1 | missense                    | c.1153          | p.V385L  | tier1 | 85  | 1  | 0.012 | 148 | 54  | 0.267 |
| 147457 | X  | 79281277  | 79281277  | G | A | SNP | TBX22           | ENST00000373294 | 1  | splice_site                 | c.633+1         | e4+1     | tier1 | 54  | 0  | 0.000 | 218 | 87  | 0.284 |
| 147457 | X  | 84525966  | 84525966  | C | T | SNP | ZNF711          | ENST00000395402 | 1  | missense                    | c.1442          | p.P481L  | tier1 | 119 | 1  | 0.008 | 236 | 105 | 0.308 |
| 147457 | X  | 103316458 | 103316458 | C | T | SNP | H2BFWT          | ENST00000217926 | -1 | 5_prime_flanking_region     | c.-48226        | NULL     | tier3 | 288 | 4  | 0.014 | 491 | 187 | 0.275 |
| 147457 | X  | 105144665 | 105144665 | C | T | SNP | NRK             | ENST00000428173 | 1  | missense                    | c.766           | p.P256S  | tier1 | 123 | 0  | 0.000 | 125 | 52  | 0.294 |
| 147457 | X  | 120181966 | 120181966 | G | A | SNP | GLUD2           | ENST00000328078 | 1  | missense                    | c.428           | p.R143H  | tier1 | 168 | 2  | 0.012 | 398 | 194 | 0.327 |
| 147457 | X  | 123215311 | 123215311 | C | T | SNP | STAG2           | ENST00000218089 | 1  | nonsense                    | c.2857          | p.R953*  | tier1 | 402 | 0  | 0.000 | 644 | 273 | 0.297 |
| 147457 | X  | 128929233 | 128929233 | G | A | SNP | ENSG00000240143 | ENST00000432513 | 1  | intronic                    | c.NULL          | NULL     | tier3 | 85  | 0  | 0.000 | 142 | 57  | 0.286 |
| 147457 | X  | 129190113 | 129190113 | C | T | SNP | BCORL1          | ENST00000303743 | 1  | 3_prime_untranslated_region | c.*2            | NULL     | tier3 | 40  | 0  | 0.000 | 142 | 42  | 0.228 |
| 147457 | X  | 129318354 | 129318354 | C | T | SNP | RAB33A          | ENST00000257017 | 1  | silent                      | c.354           | p.D118   | tier1 | 58  | 0  | 0.000 | 193 | 84  | 0.303 |
| 147457 | X  | 129658059 | 129658059 | G | A | SNP | ENSG00000229702 | ENST00000458525 | -1 | 5_prime_untranslated_region | c.-129658059    | NULL     | tier2 | 41  | 0  | 0.000 | 208 | 97  | 0.317 |
| 147457 | X  | 135961560 | 135961560 | C | G | SNP | RBMX            | ENST00000320676 | -1 | missense                    | c.27            | p.K9N    | tier1 | 101 | 0  | 0.000 | 147 | 13  | 0.081 |
| 147457 | X  | 138678815 | 138678815 | G | A | SNP | MCF2            | ENST00000370578 | -1 | nonsense                    | c.2605          | p.R869*  | tier1 | 239 | 1  | 0.004 | 280 | 112 | 0.285 |
| 147457 | X  | 152808398 | 152808398 | G | A | SNP | ATP2B3          | ENST00000263519 | 1  | intronic                    | c.791-103       | e5-103   | tier3 | 47  | 1  | 0.021 | 172 | 70  | 0.288 |
| 147457 | X  | 153660704 | 153660704 | C | T | SNP | ATP6AP1         | ENST00000369762 | 1  | silent                      | c.456           | p.L152   | tier1 | 31  | 0  | 0.000 | 221 | 109 | 0.329 |
| 147457 | X  | 153696165 | 153696165 | G | A | SNP | PLXNA3          | ENST00000369682 | 1  | missense                    | c.3641          | p.R1214Q | tier1 | 19  | 0  | 0.000 | 120 | 56  | 0.316 |
| 169510 | 1  | 115258745 | 115258745 | C | G | SNP | NRAS            | ENST00000369535 | -1 | missense                    | c.37            | p.G13R   | tier1 | 447 | 15 | 0.033 | 489 | 323 | 0.397 |
| 169510 | 1  | 197168802 | 197168802 | C | T | SNP | ZBTB41          | ENST00000367405 | -1 | missense                    | c.802           | p.D268N  | tier1 | 51  | 3  | 0.056 | 40  | 26  | 0.394 |
| 169510 | 2  | 39053173  | 39053173  | C | T | SNP | DHX57           | ENST00000295373 | -1 | missense                    | c.2830          | p.G944R  | tier1 | 52  | 1  | 0.019 | 68  | 46  | 0.404 |
| 169510 | 2  | 70458050  | 70458051  | - | A | INS | TIA1            | ENST00000433529 | -1 | intronic                    | c.124-65_124-64 | e3-64    | tier3 | 102 | 0  | 0.000 | 172 | 15  | 0.080 |
| 169510 | 2  | 73316541  | 73316541  | G | A | SNP | RAB11FIP5       | ENST00000493523 | -1 | rna                         | NULL            | NULL     | tier1 | 60  | 5  | 0.077 | 54  | 42  | 0.438 |
| 169510 | 3  | 184922434 | 184922434 | C | G | SNP | EHHADH          | ENST00000231887 | -1 | missense                    | c.680           | p.C227S  | tier1 | 57  | 3  | 0.050 | 68  | 42  | 0.382 |
| 169510 | 3  | 192874515 | 192874515 | G | A | SNP | VEZF1P1         | ENST00000423931 | -1 | 5_prime_untranslated_region | c.-192874515    | NULL     | tier2 | 124 | 9  | 0.068 | 171 | 131 | 0.434 |
| 169510 | 4  | 96044976  | 96044976  | C | G | SNP | BMPR1B          | ENST00000440890 | 1  | missense                    | c.455           | p.P152R  | tier1 | 109 | 3  | 0.027 | 63  | 45  | 0.417 |
| 169510 | 4  | 170483082 | 170483082 | C | A | SNP | NEK1            | ENST00000       |    |                             |                 |          |       |     |    |       |     |     |       |



|        |    |           |           |   |       |     |                    |                 |    |                             |             |          |       |     |    |       |     |     |       |
|--------|----|-----------|-----------|---|-------|-----|--------------------|-----------------|----|-----------------------------|-------------|----------|-------|-----|----|-------|-----|-----|-------|
| 169510 | 8  | 9634628   | 9634628   | A | G     | SNP | <i>TNKS</i>        | ENST00000310430 | 1  | 3_prime_untranslated_region | c.*382      | NULL     | tier3 | 90  | 6  | 0.062 | 73  | 60  | 0.451 |
| 169510 | 8  | 17206503  | 17206503  | G | A     | SNP | <i>MTMR7</i>       | ENST00000180173 | -1 | missense                    | c.556       | p.R186W  | tier1 | 112 | 5  | 0.043 | 111 | 74  | 0.400 |
| 169510 | 9  | 8485187   | 8485187   | C | T     | SNP | <i>PTPRD</i>       | ENST00000356435 | -1 | intronic                    | c.3153+40   |          | tier3 | 67  | 2  | 0.029 | 57  | 51  | 0.468 |
| 169510 | 9  | 99691238  | 99691238  | G | C     | SNP | <i>NUTM2G</i>      | ENST00000354649 | 1  | 5_prime_untranslated_region | c.-69       | NULL     | tier3 | 90  | 0  | 0.000 | 185 | 41  | 0.181 |
| 169510 | 9  | 139848309 | 139848309 | C | G     | SNP | <i>LCN12</i>       | ENST00000371633 | -1 | missense                    | c.341       | p.A114G  | tier1 | 82  | 5  | 0.056 | 139 | 91  | 0.396 |
| 169510 | 10 | 42832502  | 42832503  | - | TATCG | INS | <i>LOC441666</i>   | ENST00000609841 | -1 | rna                         | NULL        | NULL     | tier1 | 264 | 1  | 0.004 | 263 | 14  | 0.051 |
| 169510 | 10 | 42832522  | 42832522  | C | A     | SNP | <i>LOC441666</i>   | ENST00000609841 | -1 | rna                         | NULL        | NULL     | tier1 | 258 | 2  | 0.008 | 261 | 15  | 0.053 |
| 169510 | 10 | 102703909 | 102703909 | T | G     | SNP | <i>FAM178A</i>     | ENST00000370269 | 1  | intronic                    | c.2757+24   | e12+24   | tier3 | 57  | 1  | 0.017 | 44  | 35  | 0.443 |
| 169510 | 11 | 1085942   | 1085942   | G | A     | SNP | <i>MUC2</i>        | ENST00000441003 | 1  | missense                    | c.2782      | p.E928K  | tier1 | 45  | 4  | 0.082 | 41  | 36  | 0.468 |
| 169510 | 11 | 6191332   | 6191332   | C | T     | SNP | <i>OR52B2</i>      | ENST00000530810 | -1 | silent                      | c.225       | p.L75    | tier1 | 91  | 7  | 0.071 | 97  | 69  | 0.416 |
| 169510 | 12 | 149069    | 149069    | G | A     | SNP | <i>FAM138D</i>     | ENST00000320165 | -1 | rna                         | NULL        | NULL     | tier1 | 187 | 9  | 0.046 | 312 | 172 | 0.355 |
| 169510 | 12 | 22625197  | 22625197  | A | T     | SNP | <i>C2CD5</i>       | ENST00000333957 | -1 | intronic                    | c.2169+23   | e17+23   | tier3 | 211 | 9  | 0.041 | 182 | 123 | 0.402 |
| 169510 | 12 | 58215300  | 58215300  | C | T     | SNP | <i>CTDSP2</i>      | ENST00000398073 | -1 | 3_prime_untranslated_region | c.*2085     | NULL     | tier3 | 27  | 1  | 0.036 | 38  | 27  | 0.403 |
| 169510 | 12 | 81655879  | 81655879  | G | C     | SNP | <i>PPFIA2</i>      | ENST00000549396 | -1 | intronic                    | c.3716-60   | e30-60   | tier3 | 54  | 2  | 0.036 | 54  | 36  | 0.400 |
| 169510 | 12 | 110783211 | 110783211 | T | A     | SNP | <i>ATP2A2</i>      | ENST00000539276 | 1  | intronic                    | c.2741+24   | e18+24   | tier3 | 44  | 2  | 0.044 | 69  | 47  | 0.405 |
| 169510 | 14 | 21216226  | 21216226  | C | G     | SNP | <i>EDDM3A</i>      | ENST00000326842 | 1  | 3_prime_untranslated_region | c.*43       | NULL     | tier3 | 44  | 0  | 0.000 | 89  | 39  | 0.305 |
| 169510 | 15 | 85383164  | 85383164  | C | T     | SNP | <i>ALPK3</i>       | ENST00000258888 | 1  | silent                      | c.1260      | p.P420   | tier1 | 389 | 36 | 0.084 | 508 | 424 | 0.453 |
| 169510 | 16 | 32070612  | 32070612  | A | C     | SNP | <i>IGHV1OR16-3</i> | ENST00000568138 | 1  | 3_prime_untranslated_region | c.*32070612 | NULL     | tier2 | 213 | 1  | 0.005 | 355 | 18  | 0.048 |
| 169510 | 16 | 57250830  | 57250830  | A | T     | SNP | <i>RSPRY1</i>      | ENST00000394420 | 1  | missense                    | c.784       | p.T262S  | tier1 | 134 | 5  | 0.036 | 110 | 105 | 0.486 |
| 169510 | 16 | 89597025  | 89597025  | C | T     | SNP | <i>SPG7</i>        | ENST00000268704 | 1  | intronic                    | c.862-66    | e7-66    | tier3 | 42  | 1  | 0.023 | 52  | 38  | 0.422 |
| 169510 | 17 | 7414546   | 7414546   | G | C     | SNP | <i>POLR2A</i>      | ENST00000322644 | 1  | missense                    | c.3826      | p.V1276L | tier1 | 59  | 3  | 0.048 | 60  | 58  | 0.492 |
| 169510 | 17 | 7832533   | 7832533   | C | T     | SNP | <i>KCNAB3</i>      | ENST00000303790 | -1 | missense                    | c.221       | p.R74Q   | tier1 | 77  | 4  | 0.049 | 73  | 54  | 0.252 |
| 169510 | 17 | 10352234  | 10352234  | G | A     | SNP | <i>MYH4</i>        | ENST00000255381 | -1 | nonsense                    | c.4312      | p.R1438* | tier1 | 667 | 29 | 0.042 | 704 | 508 | 0.419 |
| 169510 | 17 | 49835349  | 49835349  | C | T     | SNP | <i>CA10</i>        | ENST00000340813 | -1 | intronic                    | c.298-10171 | e4-10171 | tier3 | 96  | 2  | 0.020 | 106 | 70  | 0.398 |
| 169510 | 17 | 73997619  | 73997619  | A | G     | SNP | <i>CDK3</i>        | ENST00000425876 | 1  | missense                    | c.113       | p.D38G   | tier1 | 74  | 3  | 0.039 | 82  | 55  | 0.402 |
| 169510 | 17 | 74733199  | 74733199  | G | T     | SNP | <i>SRSF2</i>       | ENST00000359995 | -1 | missense                    | c.44        | p.S15Y   | tier1 | 254 | 23 | 0.083 | 327 | 310 | 0.486 |
| 169510 | 17 | 74733200  | 74733200  | A | C     | SNP | <i>SRSF2</i>       | ENST00000359995 | -1 | missense                    | c.43        | p.S15A   | tier1 | 258 | 21 | 0.075 | 328 | 310 | 0.486 |
| 169510 | 19 | 15996791  | 15996791  | C | T     | SNP | <i>CYP4F2</i>      | ENST00000221700 | -1 | missense                    | c.1058      | p.R353H  | tier1 | 133 | 9  | 0.063 | 127 | 96  | 0.431 |
| 169510 | 19 | 50753076  | 50753076  | G | A     | SNP | <i>MYH14</i>       | ENST00000262269 | 1  | missense                    | c.1652      | p.R551Q  | tier1 | 80  | 6  | 0.070 | 95  | 76  | 0.442 |
| 169510 | 20 | 48600334  | 48600334  | C | T     | SNP | <i>SNAI1</i>       | ENST00000244050 | 1  | intronic                    | c.83-27     | e2-27    | tier2 | 40  | 0  | 0.000 | 110 | 19  | 0.147 |
| 169510 | 20 | 49575622  | 49575622  | G | T     | SNP | <i>MOCS3</i>       | ENST00000244051 | 1  | silent                      | c.243       | p.G81    | tier1 | 18  | 1  | 0.053 | 19  | 19  | 0.500 |
| 169510 | 21 | 36231782  | 36231782  | C | T     | SNP | <i>RUNX1</i>       | ENST00000300305 | -1 | missense                    | c.602       | p.R201Q  | tier1 | 719 | 55 | 0.071 | 843 | 712 | 0.457 |
| 169510 | X  | 123176411 | 123176411 | A | G     | SNP | <i>STAG2</i>       | ENST00000218089 | 1  | splice_region               | c.386-8     | e5-8     | tier3 | 275 | 37 | 0.119 | 24  | 240 | 0.899 |
| 185295 | 1  | 12032977  | 12032977  | C | T     | SNP | <i>PLOD1</i>       | ENST00000376369 | 1  | missense                    | c.2092      | p.P698S  | tier1 | 113 | 0  | 0.000 | 115 | 49  | 0.299 |
| 185295 | 1  | 167341159 | 167341159 | A | T     | SNP | <i>POU2F1</i>      | ENST00000367866 | 1  | missense                    | c.288       | p.K96N   | tier1 | 105 | 0  | 0.000 | 86  | 28  | 0.246 |
| 185295 | 1  | 176675464 | 176675464 | G | A     | SNP | <i>PAPPA2</i>      | ENST00000367662 | 1  | intronic                    | c.3366-31   | e9-31    | tier3 | 106 | 2  | 0.019 | 72  | 36  | 0.333 |
| 185295 | 1  | 220830533 | 220830533 | C | T     | SNP | <i>MARK1</i>       | ENST00000366917 | 1  | intronic                    | c.1989-599  | e17-599  | tier3 | 239 | 0  | 0.000 | 185 | 75  | 0.289 |
| 185295 | 1  | 244218466 | 244218466 | C | A     | SNP | <i>ZBTB18</i>      | ENST00000358704 | 1  | missense                    | c.1390      | p.R464S  | tier1 | 33  | 0  | 0.000 | 34  | 15  | 0.306 |
| 185295 | 2  | 56611386  | 56611386  | C | T     | SNP | <i>CCDC85A</i>     | ENST00000407595 | 1  | intronic                    | c.1573-15   | e6-15    | tier3 | 149 | 1  | 0.007 | 100 | 9   | 0.083 |
| 185295 | 4  | 20529829  | 20529829  | G | A     | SNP | <i>SLIT2</i>       | ENST00000504154 | 1  | intronic                    | c.1463-743  | e16-743  | tier3 | 96  | 0  | 0.000 | 76  | 25  | 0.248 |
| 185295 | 4  | 69344614  | 69344614  | G | A     | SNP | <i>TMPPRS11E</i>   | ENST00000305363 | 1  | missense                    | c.1015      | p.A339T  | tier1 | 95  | 0  | 0.000 | 79  | 25  | 0.238 |
| 185295 | 4  | 159618713 | 159618713 | A | T     | SNP | <i>ETFDH</i>       | ENST00000511912 | 1  | missense                    | c.834       | p.L278F  | tier1 | 37  | 1  | 0.026 | 45  | 16  | 0.262 |
| 185295 | 4  | 169195149 | 169195149 | T | C     | SNP | <i>DDX60</i>       | ENST00000393743 | -1 | missense                    | c.2390      | p.Y797C  | tier1 | 99  | 0  | 0.000 | 68  | 18  | 0.209 |
| 185295 | 6  | 5144542   | 5144542   | T | C     | SNP | <i>LYRM4</i>       | ENST00000330636 | -1 | intronic                    | c.208-34817 | e3-34817 | tier3 | 45  | 0  | 0.000 | 29  | 15  | 0.341 |
| 185295 | 6  | 13365713  | 13365713  | C | T     | SNP | <i>GFOD1</i>       | ENST00000379287 | -1 | silent                      | c.435       | p.V145   | tier1 | 53  | 0  | 0.000 | 41  | 16  | 0.281 |
| 185295 | 6  | 157150512 | 157150512 | G | A     | SNP | <i>ARID1B</i>      | ENST00000367148 | 1  | missense                    | c.1694      | p.R565Q  | tier1 | 105 | 0  | 0.000 | 75  | 21  | 0.219 |
| 185295 | 7  | 124404234 | 124404234 | C | T     | SNP | <i>GPR37</i>       | ENST00000303921 | -1 | missense                    | c.797       | p.C266Y  | tier1 | 77  | 0  | 0.000 | 85  | 34  | 0.286 |
| 185295 | 7  | 146805221 | 146805221 | T | -     | DEL | <i>CNTNAP2</i>     | ENST00000361727 | 1  | intronic                    | c.551-18    | e5-18    | tier3 | 72  | 2  | 0.027 | 73  | 21  | 0.223 |
| 185295 | 8  | 70533457  | 70533457  | G | A     | SNP | <i>SULF1</i>       | ENST00000260128 | 1  | missense                    | c.1565      | p.R522Q  | tier1 | 71  | 0  | 0.000 | 66  | 35  | 0.347 |
| 185295 | 8  | 145737271 | 145737271 | C | G     | SNP | <i>RECQL4</i>      | ENST00000428558 | -1 | intronic                    | c.3393+23   | e20+23   | tier3 | 50  | 0  | 0.000 | 39  | 28  | 0.418 |
| 185295 | 9  | 97380079  | 97380079  | C | T     | SNP | <i>FBP1</i>        | ENST00000375326 | -1 | missense                    | c.397       | p.V133I  | tier1 | 121 | 1  | 0.008 | 94  | 54  | 0.365 |
| 185295 | 10 | 75510973  | 75510973  | G | -     | DEL | <i>SEC24C</i>      | ENST00000339365 | 1  | frame_shift_del             | c.280       | p.P95fs  | tier1 | 53  | 0  | 0.000 | 61  | 13  | 0.176 |
| 185295 | 10 | 88414661  | 88414661  | C | T     | SNP | <i>OPN4</i>        | ENST00000372071 | 1  | missense                    | c.121       | p.R41W   | tier1 | 79  | 0  | 0.000 | 93  | 40  | 0.301 |
| 185295 | 11 | 17663639  | 17663639  | C | A     | SNP | <i>OTOG</i>        | ENST00000399391 | 1  | intronic                    | c.8332-35   | e52-35   | tier3 | 59  | 0  | 0.000 | 64  | 36  | 0.360 |
| 185295 | 12 | 49719635  | 49719635  | C | T     | SNP | <i>TROAP</i>       | ENST00000257909 | 1  | missense                    | c.601       | p.R201W  | tier1 | 65  | 0  | 0.000 | 81  | 25  | 0.236 |
| 185295 | 12 | 65272304  | 65272304  | C | T     | SNP | <i>TBC1D30</i>     | ENST00000542120 | 1  | 3_prime_untranslated_region | c.*2736     | NULL     | tier3 | 75  | 0  | 0.000 | 86  | 41  | 0.323 |
| 185295 | 12 | 124427322 | 124427322 | A | C     | SNP | <i>CCDC92</i>      | ENST00000238156 | -1 | nonsense                    | c.192       | p.Y64*   | tier1 | 119 | 0  | 0.000 | 76  | 46  | 0.371 |
| 185295 | 13 | 48547335  | 48547335  | G | A     | SNP | <i>SUCLA2</i>      | ENST00000378654 | -1 | intronic                    | c.663+64    | e5+64    | tier3 | 96  | 0  | 0.000 | 104 | 37  | 0.262 |
| 185295 | 13 | 52684711  | 52684711  | G | T     | SNP | <i>NEK5</i>        | ENST00000355568 | -1 | silent                      | c.315       | p.I105   | tier1 | 84  | 0  | 0.000 | 84  | 43  | 0.339 |
| 185295 | 14 | 96552991  | 96552991  | C | T     | SNP | <i>C14orf132</i>   | ENST00000553764 | 1  | rna                         | NULL        | NULL     | tier1 | 46  | 0  | 0.000 | 42  | 22  | 0.344 |
| 185295 | 15 | 50926721  | 50926721  | T | C     | SNP | <i>TRPM7</i>       | ENST00000313478 | -1 | missense                    | c.865       | p.I289V  | tier1 | 157 | 0  | 0.000 | 174 | 83  | 0.323 |
| 185295 | 15 | 78207447  | 78207447  | T | A     | SNP | <i>LOC645752</i>   | ENST00000563349 | -1 | rna                         | NULL        | NULL     | tier1 | 159 | 0  | 0.000 | 127 | 60  | 0.321 |
| 185295 | 15 | 85343270  | 85343270  | C | G     | SNP | <i>ZNF592</i>      | ENST00000299927 | 1  | intronic                    | c.3273+62   | e7+62    | tier3 | 42  | 0  | 0.000 | 42  | 26  | 0.382 |
| 185295 | 17 | 10545798  | 10545798  | C | T     | SNP | <i>MYH3</i>        | ENST00000226209 | -1 | silent                      | c.1824      | p.G608   | tier1 | 204 | 1  | 0.005 | 199 | 52  | 0.207 |
| 185295 | 17 | 43008929  | 43008929  | C | T     | SNP | <i>KIF18B</i>      | ENST00000339151 | -1 | intronic                    | c.1553+41   | e10+41   | tier3 | 38  | 0  | 0.000 | 19  | 12  | 0.387 |
| 185295 | 17 | 62658267  | 62658267  | C | A     | SNP | <i>SMURF2</i>      | ENST00000262435 | -1 | 5_prime_flanking_region     | c.-269      | NULL     | tier4 | 6   | 0  | 0.000 | 1   | 5   | 0.833 |
| 185295 | 18 | 60572437  | 60572437  | G | T     | SNP | <i>PHLPP1</i>      | ENST00000262719 | 1  | intronic                    | c.2648-20   | e8-20    | tier3 | 135 | 0  | 0.000 | 119 | 9   | 0.070 |
| 185295 | 21 | 44524456  | 4         |   |       |     |                    |                 |    |                             |             |          |       |     |    |       |     |     |       |

|        |    |           |           |     |   |     |                 |                 |    |                             |              |           |       |     |   |       |      |     |       |
|--------|----|-----------|-----------|-----|---|-----|-----------------|-----------------|----|-----------------------------|--------------|-----------|-------|-----|---|-------|------|-----|-------|
| 187374 | 1  | 44467034  | 44467034  | C   | G | SNP | <i>SLC6A9</i>   | ENST00000360584 | -1 | intronic                    | c.1419+28    | e9+28     | tier3 | 85  | 4 | 0.045 | 63   | 43  | 0.406 |
| 187374 | 1  | 47512254  | 47512254  | G   | A | SNP | <i>CYP4X1</i>   | ENST00000371901 | 1  | missense                    | c.1189       | p.G397R   | tier1 | 65  | 0 | 0.000 | 73   | 43  | 0.371 |
| 187374 | 1  | 176564033 | 176564033 | C   | T | SNP | <i>PAPPA2</i>   | ENST00000367662 | 1  | silent                      | c.1293       | p.T431    | tier1 | 79  | 1 | 0.013 | 59   | 27  | 0.314 |
| 187374 | 1  | 179526224 | 179526224 | G   | A | SNP | <i>NPHS2</i>    | ENST00000367615 | -1 | silent                      | c.676        | p.L226    | tier1 | 120 | 2 | 0.016 | 127  | 70  | 0.355 |
| 187374 | 2  | 25463295  | 25463295  | T   | A | SNP | <i>DNMT3A</i>   | ENST00000264709 | -1 | missense                    | c.2198       | p.E733V   | tier1 | 514 | 3 | 0.006 | 499  | 303 | 0.376 |
| 187374 | 2  | 37458814  | 37458814  | C   | A | SNP | <i>CEBPZ</i>    | ENST00000234170 | -1 | 5_prime_untranslated_region | c.-104       | NULL      | tier2 | 73  | 0 | 0.000 | 90   | 42  | 0.316 |
| 187374 | 2  | 42280542  | 42280542  | G   | A | SNP | <i>PKDCC</i>    | ENST00000485578 | 1  | 3_prime_untranslated_region | c.*42280542  | NULL      | tier3 | 39  | 0 | 0.000 | 37   | 25  | 0.403 |
| 187374 | 2  | 196673523 | 196673523 | C   | A | SNP | <i>DNAH7</i>    | ENST00000312428 | -1 | missense                    | c.9966       | p.W3322C  | tier1 | 92  | 0 | 0.000 | 116  | 48  | 0.293 |
| 187374 | 2  | 207570559 | 207570559 | G   | A | SNP | <i>DYTN</i>     | ENST00000452335 | -1 | missense                    | c.335        | p.A112V   | tier1 | 106 | 2 | 0.018 | 111  | 61  | 0.355 |
| 187374 | 3  | 49700929  | 49700929  | C   | - | DEL | <i>BSN</i>      | ENST00000296452 | 1  | frame_shift_del             | c.11338      | p.Q3780fs | tier1 | 829 | 4 | 0.005 | 651  | 329 | 0.336 |
| 187374 | 3  | 133667500 | 133667500 | C   | T | SNP | <i>SLCO2A1</i>  | ENST00000310926 | -1 | missense                    | c.985        | p.V329I   | tier1 | 60  | 1 | 0.016 | 52   | 20  | 0.278 |
| 187374 | 4  | 89352470  | 89352470  | T   | - | DEL | <i>HERC6</i>    | ENST00000264346 | 1  | intronic                    | c.2250+13    | e17+13    | tier3 | 69  | 1 | 0.014 | 85   | 15  | 0.150 |
| 187374 | 6  | 49676860  | 49676860  | A   | G | SNP | <i>CRISP2</i>   | ENST00000339139 | -1 | missense                    | c.50         | p.L17S    | tier1 | 102 | 0 | 0.000 | 76   | 56  | 0.421 |
| 187374 | 7  | 139083345 | 139083345 | A   | T | SNP | <i>LUC7L2</i>   | ENST00000541515 | 1  | nonsense                    | c.355        | p.R119*   | tier1 | 394 | 3 | 0.008 | 251  | 149 | 0.373 |
| 187374 | 9  | 101751401 | 101751401 | G   | T | SNP | <i>COL15A1</i>  | ENST00000375001 | 1  | intronic                    | c.724-59     | e5-59     | tier3 | 63  | 0 | 0.000 | 49   | 23  | 0.319 |
| 187374 | 9  | 131708388 | 131708388 | C   | A | SNP | <i>DOLK</i>     | ENST00000372586 | -1 | nonsense                    | c.1195       | p.R399*   | tier1 | 37  | 1 | 0.026 | 30   | 23  | 0.434 |
| 187374 | 9  | 132980111 | 132980111 | G   | T | SNP | <i>NCS1</i>     | ENST00000372398 | 1  | missense                    | c.90         | p.W30C    | tier1 | 58  | 3 | 0.049 | 74   | 34  | 0.315 |
| 187374 | 10 | 25465090  | 25465090  | T   | T | SNP | <i>GPR158</i>   | ENST00000376351 | 1  | silent                      | c.741        | p.G247    | tier1 | 78  | 0 | 0.000 | 62   | 37  | 0.374 |
| 187374 | 11 | 36601073  | 36601073  | C   | C | SNP | <i>RAG1</i>     | ENST00000299440 | 1  | 3_prime_untranslated_region | c.*3087      | NULL      | tier2 | 161 | 0 | 0.000 | 75   | 28  | 0.269 |
| 187374 | 11 | 70779207  | 70779207  | C   | T | SNP | <i>SHANK2</i>   | ENST00000338508 | -1 | intronic                    | c.1072+71    | e14+71    | tier4 | 27  | 0 | 0.000 | 14   | 20  | 0.588 |
| 187374 | 11 | 93439939  | 93439939  | C   | A | SNP | <i>KIAA1731</i> | ENST00000411936 | 1  | missense                    | c.5625       | p.D1875E  | tier1 | 95  | 1 | 0.010 | 102  | 49  | 0.325 |
| 187374 | 11 | 93826848  | 93826848  | T   | C | SNP | <i>HEPHL1</i>   | ENST00000315765 | 1  | intronic                    | c.2434+42    | e13+42    | tier2 | 46  | 0 | 0.000 | 27   | 22  | 0.449 |
| 187374 | 12 | 53699798  | 53699798  | T   | G | SNP | <i>C12orf10</i> | ENST00000549488 | 1  | missense                    | c.107        | p.V36G    | tier1 | 70  | 1 | 0.014 | 68   | 29  | 0.299 |
| 187374 | 12 | 56811467  | 56811467  | G   | A | SNP | <i>TIMELESS</i> | ENST00000557589 | -1 | 5_prime_untranslated_region | c.-56811467  | NULL      | tier3 | 45  | 0 | 0.000 | 86   | 37  | 0.301 |
| 187374 | 12 | 106631792 | 106631792 | CAA | - | DEL | <i>CKAP4</i>    | ENST00000378026 | -1 | 3_prime_untranslated_region | c.*1010      | NULL      | tier4 | 51  | 0 | 0.000 | 53   | 9   | 0.145 |
| 187374 | 13 | 73334857  | 73334857  | C   | T | SNP | <i>DIS3</i>     | ENST00000377767 | -1 | intronic                    | c.2671-68    | e20-68    | tier3 | 242 | 1 | 0.004 | 159  | 84  | 0.344 |
| 187374 | 16 | 32187496  | 32187496  | A   | - | DEL | <i>HERC2P4</i>  | ENST00000433784 | -1 | 5_prime_untranslated_region | c.-32187496  | NULL      | tier3 | 17  | 0 | 0.000 | 7    | 8   | 0.533 |
| 187374 | 17 | 8011913   | 8011913   | G   | A | SNP | <i>ALOXE3</i>   | ENST00000318227 | -1 | splice_region               | c.1959-6     | e13-6     | tier3 | 71  | 1 | 0.014 | 64   | 33  | 0.337 |
| 187374 | 17 | 13399643  | 13399643  | C   | T | SNP | <i>HS3ST3A1</i> | ENST00000284110 | -1 | silent                      | c.1092       | p.L364    | tier1 | 88  | 0 | 0.000 | 82   | 46  | 0.359 |
| 187374 | 17 | 21319856  | 21319856  | G   | A | SNP | <i>KCNJ12</i>   | ENST00000331718 | 1  | missense                    | c.1202       | p.R401Q   | tier1 | 87  | 0 | 0.000 | 94   | 17  | 0.153 |
| 187374 | 17 | 27936061  | 27936061  | C   | T | SNP | <i>ANKRD13B</i> | ENST00000394859 | 1  | intronic                    | c.566-43     | e6-43     | tier3 | 64  | 1 | 0.015 | 46   | 22  | 0.324 |
| 187374 | 17 | 38926332  | 38926332  | C   | T | SNP | <i>KRT26</i>    | ENST00000335552 | -1 | missense                    | c.724        | p.V242M   | tier1 | 119 | 1 | 0.008 | 121  | 70  | 0.367 |
| 187374 | 17 | 43530828  | 43530828  | C   | G | SNP | <i>PLEKHM1</i>  | ENST00000430334 | -1 | missense                    | c.2390       | p.C797S   | tier1 | 80  | 0 | 0.000 | 63   | 17  | 0.213 |
| 187374 | 19 | 648180    | 648180    | G   | A | SNP | <i>RNF126</i>   | ENST00000292363 | -1 | missense                    | c.884        | p.S295L   | tier1 | 81  | 0 | 0.000 | 82   | 57  | 0.407 |
| 187374 | 19 | 17471347  | 17471347  | C   | T | SNP | <i>PLVAP</i>    | ENST00000252590 | -1 | missense                    | c.1312       | p.A438T   | tier1 | 51  | 0 | 0.000 | 85   | 36  | 0.295 |
| 187374 | 20 | 44037609  | 44037609  | C   | T | SNP | <i>DBNDD2</i>   | ENST00000372717 | 1  | missense                    | c.308        | p.A103V   | tier1 | 37  | 1 | 0.026 | 50   | 23  | 0.315 |
| 187374 | 21 | 35467626  | 35467626  | G   | A | SNP | <i>SLC5A3</i>   | ENST00000381151 | 1  | silent                      | c.129        | p.G43     | tier1 | 112 | 1 | 0.009 | 103  | 49  | 0.322 |
| 187374 | 21 | 43412853  | 43412853  | G   | C | SNP | <i>ZBTB21</i>   | ENST00000310826 | -1 | missense                    | c.1352       | p.A451G   | tier1 | 27  | 0 | 0.000 | 33   | 19  | 0.365 |
| 187374 | 22 | 20133674  | 20133674  | C   | T | SNP | <i>ZDHC8</i>    | ENST00000334554 | 1  | 3_prime_untranslated_region | c.*751       | NULL      | tier3 | 92  | 1 | 0.011 | 79   | 32  | 0.288 |
| 187374 | X  | 110489305 | 110489305 | C   | T | SNP | <i>CAPN6</i>    | ENST00000324068 | -1 | 3_prime_untranslated_region | c.*500       | NULL      | tier3 | 28  | 0 | 0.000 | 18   | 25  | 0.581 |
| 189012 | 1  | 16973159  | 16973159  | A   | T | SNP | <i>MST1P2</i>   | ENST00000334429 | 1  | 3_prime_untranslated_region | c.*16973159  | NULL      | tier3 | 128 | 1 | 0.008 | 265  | 24  | 0.083 |
| 189012 | 2  | 122368824 | 122368824 | T   | G | SNP | <i>CLASP1</i>   | ENST00000263710 | -1 | intronic                    | c.-1-5068    | e1-5068   | tier4 | 45  | 0 | 0.000 | 127  | 27  | 0.175 |
| 189012 | 2  | 198266834 | 198266834 | T   | C | SNP | <i>SF3B1</i>    | ENST00000335508 | -1 | missense                    | c.2098       | p.K700E   | tier1 | 251 | 0 | 0.000 | 598  | 48  | 0.074 |
| 189012 | 2  | 210707164 | 210707164 | C   | T | SNP | <i>UNC80</i>    | ENST00000439458 | 1  | missense                    | c.3454       | p.R1152C  | tier1 | 51  | 0 | 0.000 | 99   | 20  | 0.168 |
| 189012 | 3  | 172674651 | 172674651 | C   | T | SNP | <i>SPATA16</i>  | ENST00000351008 | -1 | intronic                    | c.934-37     | e5-37     | tier3 | 26  | 0 | 0.000 | 68   | 22  | 0.244 |
| 189012 | 4  | 39293321  | 39293321  | T   | G | SNP | <i>RFC1</i>     | ENST00000381897 | -1 | missense                    | c.3109       | p.N1037H  | tier1 | 79  | 0 | 0.000 | 146  | 27  | 0.156 |
| 189012 | 5  | 79095309  | 79095309  | G   | A | SNP | <i>CMYA5</i>    | ENST00000446378 | 1  | missense                    | c.12080      | p.S4027N  | tier1 | 397 | 0 | 0.000 | 933  | 79  | 0.078 |
| 189012 | 5  | 131911487 | 131911487 | G   | A | SNP | <i>RAD50</i>    | ENST00000265335 | 1  | missense                    | c.232        | p.V78M    | tier1 | 118 | 0 | 0.000 | 133  | 26  | 0.164 |
| 189012 | 5  | 170232684 | 170232684 | C   | - | DEL | <i>GABRP</i>    | ENST00000265294 | 1  | intronic                    | c.542-36     | e6-36     | tier3 | 65  | 1 | 0.015 | 147  | 41  | 0.218 |
| 189012 | 6  | 56335881  | 56335881  | T   | C | SNP | <i>DST</i>      | ENST00000370754 | -1 | intronic                    | c.22228+23   | e95+23    | tier3 | 309 | 6 | 0.019 | 434  | 115 | 0.210 |
| 189012 | 6  | 158994487 | 158994487 | G   | A | SNP | <i>TMEM181</i>  | ENST00000367090 | 1  | missense                    | c.455        | p.R152H   | tier1 | 35  | 0 | 0.000 | 77   | 16  | 0.172 |
| 189012 | 8  | 140768641 | 140768641 | T   | G | SNP | <i>TRAPPC9</i>  | ENST00000389328 | -1 | intronic                    | c.3350-24196 | e22-24196 | tier3 | 50  | 0 | 0.000 | 127  | 18  | 0.122 |
| 189012 | 11 | 47753670  | 47753670  | T   | C | SNP | <i>FNBP4</i>    | ENST00000528388 | -1 | rna                         | NULL         | NULL      | tier1 | 47  | 0 | 0.000 | 60   | 14  | 0.189 |
| 189012 | 11 | 66106152  | 66106152  | C   | T | SNP | <i>BRMS1</i>    | ENST00000530238 | -1 | 5_prime_untranslated_region | c.-66106152  | NULL      | tier3 | 56  | 0 | 0.000 | 131  | 17  | 0.115 |
| 189012 | 11 | 119177652 | 119177652 | A   | - | DEL | <i>CBL</i>      | ENST00000264033 | 1  | 3_prime_untranslated_region | c.*7161      | NULL      | tier2 | 38  | 0 | 0.000 | 67   | 14  | 0.173 |
| 189012 | 12 | 8376028   | 8376028   | C   | T | SNP | <i>FAM90A1</i>  | ENST00000307435 | -1 | intronic                    | c.432+17     | e3+17     | tier3 | 691 | 1 | 0.001 | 1696 | 61  | 0.035 |
| 189012 | 14 | 20853200  | 20853200  | T   | C | SNP | <i>TEP1</i>     | ENST00000262715 | -1 | silent                      | c.3051       | p.Q1017   | tier1 | 40  | 0 | 0.000 | 72   | 15  | 0.172 |
| 189012 | 18 | 53253420  | 53253420  | C   | G | SNP | <i>TCF4</i>     | ENST00000398339 | -1 | intronic                    | c.379-837    | e4-837    | tier4 | 27  | 0 | 0.000 | 74   | 23  | 0.237 |
| 189012 | X  | 20083381  | 20083381  | A   | T | SNP | <i>MAP7D2</i>   | ENST00000379643 | -1 | intronic                    | c.131-458    | e2-458    | tier4 | 60  | 0 | 0.000 | 117  | 19  | 0.138 |
| 190938 | 1  | 17320299  | 17320299  | A   | C | SNP | <i>ATP13A2</i>  | ENST00000326735 | -1 | missense                    | c.1574       | p.V525G   | tier1 | 14  | 0 | 0.000 | 20   | 17  | 0.460 |
| 190938 | 1  | 38510268  | 38510268  | T   | - | DEL | <i>POU3F1</i>   | ENST00000373012 | -1 | 3_prime_untranslated_region | c.*792       | NULL      | tier4 | 87  | 2 | 0.023 | 217  | 34  | 0.136 |
| 190938 | 2  | 61411861  | 61411861  | A   | G | SNP | <i>AHSA2</i>    | ENST00000357022 | 1  | missense                    | c.1          | p.M1V     | tier1 | 50  | 0 | 0.000 | 131  | 70  | 0.348 |
| 190938 | 2  | 97833261  | 97833261  | T   | A | SNP | <i>ANKRD36</i>  | ENST00000420699 | 1  | intronic                    | c.1532-53    | e21-53    | tier3 | 75  | 0 | 0.000 | 582  | 66  | 0.102 |
| 190938 | 2  | 130832517 | 130832517 | T   | C | SNP | <i>POTEF</i>    | ENST00000357462 | -1 | missense                    | c.2528       | p.Y843C   | tier1 | 105 | 0 | 0.000 | 190  | 86  | 0.311 |
| 190938 | 3  | 11406161  | 11406161  | G   | T | SNP | <i>ATG7</i>     | ENST00000354449 | 1  | missense                    | c.1828       | p.D610Y   | tier1 | 48  | 0 | 0.000 | 110  | 79  | 0.418 |
| 190938 | 4  | 79394576  | 79394576  | G   | T | SNP | <i>FRAS1</i>    | ENST00000264895 | 1  | intronic                    | c.7523-16    | e53-16    | tier3 | 49  | 0 | 0.000 | 134  | 68  | 0.337 |
| 190938 | 4  | 101386736 | 101386736 | C   | T | SNP | <i>EMCN</i>     | ENST00000296420 | -1 | intronic                    | c.260-40     | e4-40     | tier3 | 19  | 0 | 0.000 | 96   | 77  | 0.445 |
| 19     |    |           |           |     |   |     |                 |                 |    |                             |              |           |       |     |   |       |      |     |       |

|        |    |           |           |   |    |     |                        |                 |    |                             |                   |           |       |     |    |       |      |      |       |
|--------|----|-----------|-----------|---|----|-----|------------------------|-----------------|----|-----------------------------|-------------------|-----------|-------|-----|----|-------|------|------|-------|
| 190938 | 11 | 60230585  | 60230585  | A | T  | SNP | <i>MS4A1</i>           | ENST00000345732 | 1  | silent                      | c.270             | p.G90     | tier1 | 27  | 0  | 0.000 | 62   | 26   | 0.296 |
| 190938 | 13 | 42803590  | 42803590  | G | A  | SNP | <i>DGKH</i>            | ENST00000337343 | 1  | 3_prime_untranslated_region | c.*266            | NULL      | tier2 | 28  | 0  | 0.000 | 68   | 51   | 0.429 |
| 190938 | 14 | 54416601  | 54416602  | - | AT | INS | <i>BMP4</i>            | ENST00000245451 | -1 | 3_prime_untranslated_region | c.*149            | NULL      | tier4 | 66  | 1  | 0.015 | 276  | 44   | 0.138 |
| 190938 | 15 | 43572011  | 43572011  | G | C  | SNP | <i>TGM7</i>            | ENST00000452443 | -1 | missense                    | c.1490            | p.A497G   | tier1 | 89  | 0  | 0.000 | 136  | 82   | 0.374 |
| 190938 | 17 | 1028614   | 1028614   | G | A  | SNP | <i>ABR</i>             | ENST00000302538 | -1 | silent                      | c.150             | p.I50     | tier1 | 84  | 0  | 0.000 | 49   | 54   | 0.519 |
| 190938 | 17 | 7578190   | 7578190   | T | C  | SNP | <i>TP53</i>            | ENST00000269305 | -1 | missense                    | c.659             | p.Y220C   | tier1 | 797 | 7  | 0.009 | 495  | 636  | 0.561 |
| 190938 | 19 | 50826916  | 50826916  | C | T  | SNP | <i>KCNC3</i>           | ENST00000477616 | -1 | missense                    | c.1294            | p.V432M   | tier1 | 18  | 0  | 0.000 | 21   | 13   | 0.382 |
| 190938 | 19 | 51958846  | 51958846  | G | A  | SNP | <i>SIGLEC8</i>         | ENST00000321424 | -1 | silent                      | c.877             | p.L293    | tier1 | 33  | 0  | 0.000 | 60   | 35   | 0.368 |
| 190938 | 20 | 58381127  | 58381127  | C | G  | SNP | <i>PHACTR3</i>         | ENST00000371015 | 1  | silent                      | c.1206            | p.L402    | tier1 | 76  | 0  | 0.000 | 106  | 59   | 0.358 |
| 190938 | X  | 124455660 | 124455660 | C | G  | SNP | <i>ENSG00000263886</i> | ENST00000580355 | 1  | 3_prime_flanking_region     | c.*33968          | NULL      | tier3 | 39  | 0  | 0.000 | 30   | 70   | 0.700 |
| 199019 | 1  | 1688824   | 1688824   | A | -  | DEL | <i>NADK</i>            | ENST00000344463 | -1 | intronic                    | c.576-75          | e5-75     | tier3 | 123 | 1  | 0.008 | 182  | 22   | 0.108 |
| 199019 | 1  | 1747229   | 1747229   | T | C  | SNP | <i>GNB1</i>            | ENST00000378609 | -1 | missense                    | c.169             | p.K57E    | tier1 | 636 | 12 | 0.019 | 623  | 296  | 0.321 |
| 199019 | 1  | 100602624 | 100602624 | A | G  | SNP | <i>TRMT13</i>          | ENST00000370141 | 1  | missense                    | c.244             | p.R82G    | tier1 | 104 | 1  | 0.010 | 176  | 126  | 0.415 |
| 199019 | 1  | 104260547 | 104260547 | G | A  | SNP | <i>AMY1P1</i>          | ENST00000440059 | 1  | intronic                    | c.NULL            | NULL      | tier3 | 81  | 2  | 0.024 | 137  | 53   | 0.279 |
| 199019 | 1  | 248402867 | 248402867 | G | T  | SNP | <i>OR2M4</i>           | ENST00000306687 | 1  | missense                    | c.637             | p.V213F   | tier1 | 71  | 0  | 0.000 | 125  | 62   | 0.332 |
| 199019 | 2  | 95942786  | 95942786  | C | T  | SNP | <i>PROM2</i>           | ENST00000317620 | 1  | missense                    | c.749             | p.A250V   | tier1 | 51  | 2  | 0.038 | 48   | 17   | 0.262 |
| 199019 | 2  | 100015184 | 100015184 | G | C  | SNP | <i>EIF5B</i>           | ENST00000470023 | 1  | 3_prime_untranslated_region | c.*100015184      | NULL      | tier3 | 96  | 3  | 0.030 | 111  | 38   | 0.255 |
| 199019 | 2  | 212288901 | 212288901 | C | T  | SNP | <i>ERBB4</i>           | ENST00000342788 | -1 | missense                    | c.2845            | p.V949I   | tier1 | 136 | 3  | 0.022 | 188  | 61   | 0.245 |
| 199019 | 2  | 219267899 | 219267899 | C | T  | SNP | <i>CTDSP1</i>          | ENST00000273062 | 1  | intronic                    | c.471+49          | e5+49     | tier3 | 82  | 0  | 0.000 | 108  | 50   | 0.317 |
| 199019 | 3  | 154002358 | 154002358 | T | -  | DEL | <i>DHX36</i>           | ENST00000496811 | -1 | intronic                    | c.2292+14         | e19+14    | tier3 | 73  | 0  | 0.000 | 126  | 15   | 0.106 |
| 199019 | 4  | 106156453 | 106156453 | G | T  | SNP | <i>TET2</i>            | ENST00000380013 | 1  | nonsense                    | c.1354            | p.E452*   | tier1 | 640 | 32 | 0.048 | 846  | 413  | 0.328 |
| 199019 | 4  | 106196304 | 106196304 | A | T  | SNP | <i>TET2</i>            | ENST00000380013 | 1  | missense                    | c.4637            | p.Q1546L  | tier1 | 741 | 5  | 0.007 | 1064 | 110  | 0.093 |
| 199019 | 5  | 7302322   | 7302322   | G | A  | SNP | <i>ENSG00000205976</i> | ENST00000512854 | -1 | intronic                    | c.NULL            | NULL      | tier3 | 175 | 4  | 0.022 | 199  | 115  | 0.363 |
| 199019 | 7  | 57529430  | 57529430  | A | C  | SNP | <i>ZNF716</i>          | ENST00000420713 | 1  | silent                      | c.1263            | p.S421    | tier1 | 81  | 0  | 0.000 | 112  | 33   | 0.228 |
| 199019 | 8  | 38835514  | 38835514  | C | T  | SNP | <i>HTRA4</i>           | ENST00000302495 | 1  | missense                    | c.814             | p.R272W   | tier1 | 70  | 0  | 0.000 | 84   | 40   | 0.323 |
| 199019 | 11 | 46747390  | 46747390  | C | T  | SNP | <i>F2</i>              | ENST00000311907 | 1  | intronic                    | c.560-19          | e7-19     | tier4 | 23  | 0  | 0.000 | 31   | 20   | 0.392 |
| 199019 | 11 | 65062076  | 65062076  | G | A  | SNP | <i>POLA2</i>           | ENST00000265465 | 1  | silent                      | c.1413            | p.L471    | tier1 | 74  | 0  | 0.000 | 114  | 29   | 0.203 |
| 199019 | 11 | 71949104  | 71949104  | G | A  | SNP | <i>INPL1</i>           | ENST00000298229 | 1  | missense                    | c.3571            | p.G1191R  | tier1 | 139 | 0  | 0.000 | 209  | 13   | 0.058 |
| 199019 | 11 | 89018012  | 89018012  | G | T  | SNP | <i>TYR</i>             | ENST00000263321 | 1  | missense                    | c.1256            | p.G419V   | tier1 | 171 | 2  | 0.012 | 178  | 71   | 0.285 |
| 199019 | 12 | 49426412  | 49426413  | - | T  | INS | <i>KMT2D</i>           | ENST00000301067 | -1 | frame_shift_ins             | c.12076_12075     | p.Q4025fs | tier1 | 789 | 16 | 0.020 | 1091 | 388  | 0.262 |
| 199019 | 12 | 119844492 | 119844492 | A | -  | DEL | <i>CCDC60</i>          | ENST00000327554 | 1  | intronic                    | c.91-21996        | e2-21996  | tier3 | 53  | 0  | 0.000 | 77   | 14   | 0.154 |
| 199019 | 12 | 124241407 | 124241407 | G | A  | SNP | <i>ATP6VOA2</i>        | ENST00000330342 | 1  | missense                    | c.2339            | p.R780H   | tier1 | 93  | 4  | 0.041 | 107  | 47   | 0.305 |
| 199019 | 14 | 106357572 | 106357572 | A | G  | SNP | <i>IGHD6-19</i>        | ENST00000390574 | -1 | silent                      | c.6               | p.Y2      | tier1 | 342 | 5  | 0.014 | 387  | 117  | 0.232 |
| 199019 | 15 | 50897271  | 50897271  | C | T  | SNP | <i>TRPM7</i>           | ENST00000313478 | -1 | missense                    | c.2780            | p.S927N   | tier1 | 47  | 0  | 0.000 | 97   | 49   | 0.336 |
| 199019 | 16 | 4736332   | 4736332   | G | A  | SNP | <i>MGRN1</i>           | ENST00000399577 | 1  | 3_prime_untranslated_region | c.*32             | NULL      | tier2 | 134 | 3  | 0.022 | 151  | 65   | 0.301 |
| 199019 | 17 | 7578445   | 7578445   | A | T  | SNP | <i>TP53</i>            | ENST00000269305 | -1 | missense                    | c.485             | p.I162N   | tier1 | 987 | 46 | 0.044 | 601  | 1092 | 0.645 |
| 199019 | 17 | 61898424  | 61898424  | A | G  | SNP | <i>FTSJ3</i>           | ENST00000427159 | -1 | silent                      | c.1938            | p.D646    | tier1 | 79  | 2  | 0.025 | 98   | 33   | 0.252 |
| 199019 | 17 | 72589154  | 72589154  | T | C  | SNP | <i>C17orf77</i>        | ENST00000328023 | 1  | 3_prime_untranslated_region | c.*237            | NULL      | tier3 | 106 | 1  | 0.009 | 117  | 53   | 0.312 |
| 199019 | 17 | 75209492  | 75209492  | G | A  | SNP | <i>SEC14L1</i>         | ENST00000392476 | 1  | missense                    | c.1960            | p.D654N   | tier1 | 62  | 0  | 0.000 | 93   | 22   | 0.191 |
| 199019 | X  | 46513121  | 46513121  | A | T  | SNP | <i>SLC9A7</i>          | ENST00000328306 | -1 | missense                    | c.1067            | p.F356Y   | tier1 | 179 | 3  | 0.017 | 184  | 54   | 0.227 |
| 199019 | X  | 132437274 | 132437274 | C | T  | SNP | <i>GPC4</i>            | ENST00000370828 | -1 | missense                    | c.1388            | p.R463H   | tier1 | 70  | 0  | 0.000 | 119  | 52   | 0.304 |
| 221833 | 1  | 3566445   | 3566445   | A | C  | SNP | <i>WRAP73</i>          | ENST00000270708 | -1 | intronic                    | c.69+50           | e1+50     | tier2 | 25  | 1  | 0.039 | 48   | 56   | 0.539 |
| 221833 | 2  | 59482372  | 59482372  | G | A  | SNP | <i>LOC101927285</i>    | ENST00000409590 | 1  | rna                         | NULL              | NULL      | tier1 | 103 | 1  | 0.010 | 281  | 107  | 0.276 |
| 221833 | 2  | 74742861  | 74742861  | T | A  | SNP | <i>TLX2</i>            | ENST00000233638 | 1  | missense                    | c.502             | p.Q168K   | tier1 | 55  | 1  | 0.018 | 64   | 156  | 0.709 |
| 221833 | 2  | 86923062  | 86923062  | C | A  | SNP | <i>CHMP3</i>           | ENST00000439940 | -1 | intronic                    | c.1-7614          | e1-7614   | tier4 | 17  | 0  | 0.000 | 37   | 76   | 0.673 |
| 221833 | 2  | 113190918 | 113190918 | C | G  | SNP | <i>RGPD8</i>           | ENST00000302558 | -1 | intronic                    | c.72+41           | e1+41     | tier4 | 51  | 2  | 0.037 | 111  | 44   | 0.282 |
| 221833 | 2  | 198638852 | 198638852 | G | A  | SNP | <i>ENSG00000222017</i> | ENST00000409845 | 1  | 3_prime_untranslated_region | c.*71             | NULL      | tier3 | 43  | 1  | 0.023 | 131  | 40   | 0.234 |
| 221833 | 3  | 38766591  | 38766591  | C | A  | SNP | <i>SCN10A</i>          | ENST00000449082 | -1 | intronic                    | c.3228+74         | e17+74    | tier3 | 54  | 0  | 0.000 | 87   | 69   | 0.442 |
| 221833 | 3  | 57616622  | 57616622  | G | A  | SNP | <i>DENND6A</i>         | ENST00000311128 | -1 | intronic                    | c.1407+30         | e16+30    | tier3 | 39  | 1  | 0.025 | 119  | 102  | 0.462 |
| 221833 | 3  | 97806175  | 97806175  | C | T  | SNP | <i>ORSAC2</i>          | ENST00000358642 | 1  | silent                      | c.159             | p.N53     | tier1 | 81  | 4  | 0.047 | 107  | 83   | 0.437 |
| 221833 | 3  | 195690286 | 195690286 | C | G  | SNP | <i>SDHAP1</i>          | ENST00000354559 | -1 | rna                         | NULL              | NULL      | tier1 | 209 | 3  | 0.014 | 906  | 64   | 0.066 |
| 221833 | 4  | 6050724   | 6050725   | - | T  | INS | <i>JAKMIP1</i>         | ENST00000409021 | -1 | intronic                    | c.1963-76_1963-75 | e15-75    | tier3 | 35  | 0  | 0.000 | 108  | 23   | 0.176 |
| 221833 | 4  | 106156548 | 106156548 | T | -  | DEL | <i>TET2</i>            | ENST00000380013 | 1  | frame_shift_del             | c.1449            | p.C484fs  | tier1 | 400 | 4  | 0.010 | 689  | 497  | 0.419 |
| 221833 | 4  | 106164859 | 106164859 | A | -  | DEL | <i>TET2</i>            | ENST00000380013 | 1  | frame_shift_del             | c.3727            | p.K1243fs | tier1 | 276 | 7  | 0.025 | 392  | 339  | 0.464 |
| 221833 | 4  | 115898324 | 115898324 | A | G  | SNP | <i>NDST4</i>           | ENST00000264363 | -1 | intronic                    | c.1066+19         | e2+19     | tier3 | 46  | 3  | 0.061 | 86   | 59   | 0.407 |
| 221833 | 5  | 13901373  | 13901373  | C | T  | SNP | <i>DNAH5</i>           | ENST00000265104 | -1 | silent                      | c.2040            | p.A680    | tier1 | 370 | 8  | 0.021 | 569  | 456  | 0.444 |
| 221833 | 6  | 33381539  | 33381539  | G | A  | SNP | <i>PHF1</i>            | ENST00000374516 | 1  | missense                    | c.614             | p.R205Q   | tier1 | 53  | 1  | 0.019 | 69   | 77   | 0.524 |
| 221833 | 7  | 36396735  | 36396735  | G | A  | SNP | <i>KIAA0895</i>        | ENST00000297063 | -1 | missense                    | c.643             | p.P215S   | tier1 | 44  | 0  | 0.000 | 55   | 49   | 0.471 |
| 221833 | 7  | 63032656  | 63032656  | G | A  | SNP | <i>TNRC18P2</i>        | ENST00000417666 | -1 | intronic                    | c.NULL            | NULL      | tier2 | 112 | 0  | 0.000 | 289  | 86   | 0.229 |
| 221833 | 7  | 74482588  | 74482588  | C | T  | SNP | <i>WBSR16</i>          | ENST00000329959 | -1 | missense                    | c.472             | p.V158M   | tier1 | 15  | 0  | 0.000 | 35   | 27   | 0.436 |
| 221833 | 9  | 9091069   | 9091069   | G | A  | SNP | <i>RPS26P3</i>         | ENST00000470205 | 1  | 3_prime_untranslated_region | c.*9091069        | NULL      | tier3 | 53  | 0  | 0.000 | 137  | 19   | 0.122 |
| 221833 | 9  | 138642911 | 138642911 | G | A  | SNP | <i>KCNT1</i>           | ENST00000298480 | 1  | intronic                    | c.434+24          | e4+24     | tier3 | 163 | 4  | 0.024 | 234  | 210  | 0.473 |
| 221833 | 11 | 63671439  | 63671439  | C | T  | SNP | <i>MARK2</i>           | ENST00000402010 | 1  | intronic                    | c.1515-19         | e15-19    | tier3 | 35  | 2  | 0.054 | 58   | 41   | 0.414 |
| 221833 | 12 | 53578786  | 53578786  | C | T  | SNP | <i>ZNF740</i>          | ENST00000416904 | 1  | missense                    | c.121             | p.R41W    | tier1 | 21  | 0  | 0.000 | 43   | 16   | 0.271 |
| 221833 | 14 | 60395157  | 60395157  | C | T  | SNP | <i>LRRC9</i>           | ENST00000254271 | 1  | missense                    | c.220             | p.P74S    | tier1 | 76  | 0  | 0.000 | 153  | 123  | 0.444 |
| 221833 | 15 | 29488779  | 29488779  | G | A  | SNP | <i>FAM189A1</i>        | ENST00000560021 | -1 | 5_prime_untranslated_region | c.-29488779       | NULL      | tier3 | 21  | 0  | 0.000 | 43   | 26   | 0.377 |
| 221833 | 16 | 67650720  | 67650720  | G | A  | SNP | <i>CTCF</i>            | ENST00000264010 | 1  | missense                    | c.1025            | p.R342H   | tier1 | 279 | 2  | 0.007 | 624  | 444  | 0.415 |
| 2      |    |           |           |   |    |     |                        |                 |    |                             |                   |           |       |     |    |       |      |      |       |

|        |    |           |           |                                         |     |     |                        |                 |    |                             |                   |                      |          |       |     |       |       |     |       |       |
|--------|----|-----------|-----------|-----------------------------------------|-----|-----|------------------------|-----------------|----|-----------------------------|-------------------|----------------------|----------|-------|-----|-------|-------|-----|-------|-------|
| 222841 | 2  | 91885956  | 91885956  | A                                       | C   | SNP | <i>ENSG00000230572</i> | ENST00000436174 | -1 | intronic                    | c.NULL            | NULL                 | tier3    | 421   | 4   | 0.009 | 1163  | 50  | 0.041 |       |
| 222841 | 3  | 17418001  | 17418002  | -                                       | A   | INS | <i>TBC1D5</i>          | ENST00000253692 | -1 | intronic                    | c.701+15_701+14   | e8+15                | tier3    | 78    | 0   | 0.000 | 207   | 22  | 0.096 |       |
| 222841 | 3  | 49571621  | 49571621  | T                                       | -   | DEL | <i>DAG1</i>            | ENST00000308775 | -1 | 3_prime_untranslated_region | c.*989            | NULL                 | tier3    | 46    | 0   | 0.000 | 63    | 14  | 0.182 |       |
| 222841 | 3  | 62142833  | 62142833  | C                                       | A   | SNP | <i>PTPRG</i>           | ENST00000474889 | 1  | missense                    | c.775             | p.P259T              | tier1    | 85    | 1   | 0.012 | 206   | 26  | 0.112 |       |
| 222841 | 3  | 195453104 | 195453104 | G                                       | A   | SNP | <i>MUC20</i>           | ENST00000447234 | 1  | missense                    | c.1630            | p.V544I              | tier1    | 152   | 0   | 0.000 | 234   | 20  | 0.079 |       |
| 222841 | 4  | 8601068   | 8601068   | G                                       | A   | SNP | <i>CPZ</i>             | ENST00000360986 | 1  | intronic                    | c.89-112          | e2-112               | tier3    | 137   | 0   | 0.000 | 280   | 25  | 0.082 |       |
| 222841 | 4  | 78694321  | 78694321  | C                                       | T   | SNP | <i>CNOT6L</i>          | ENST00000264903 | -1 | splice_site                 | c.315-1           | e4-1                 | tier1    | 180   | 0   | 0.000 | 341   | 53  | 0.134 |       |
| 222841 | 5  | 71496184  | 71496184  | C                                       | G   | SNP | <i>MAP1B</i>           | ENST00000296755 | 1  | silent                      | c.7002            | p.T2334              | tier1    | 371   | 1   | 0.003 | 767   | 51  | 0.062 |       |
| 222841 | 6  | 101215150 | 101215150 | G                                       | C   | SNP | <i>ASCC3</i>           | ENST00000369162 | -1 | nonsense                    | c.1467            | p.Y489*              | tier1    | 199   | 1   | 0.005 | 489   | 28  | 0.054 |       |
| 222841 | 6  | 117631399 | 117631399 | G                                       | C   | SNP | <i>ROS1</i>            | ENST00000368508 | -1 | silent                      | c.6279            | p.T2093              | tier1    | 145   | 0   | 0.000 | 267   | 16  | 0.057 |       |
| 222841 | 7  | 72814623  | 72814623  | C                                       | T   | SNP | <i>FZD9</i>            | ENST00000344575 | 1  | 5_prime_flanking_region     | c.-33715          | NULL                 | tier3    | 210   | 1   | 0.005 | 345   | 25  | 0.068 |       |
| 222841 | 8  | 19694580  | 19694580  | C                                       | G   | SNP | <i>INTS10</i>          | ENST00000520670 | 1  | missense                    | c.17              | p.S6C                | tier1    | 113   | 0   | 0.000 | 246   | 21  | 0.079 |       |
| 222841 | 8  | 22548343  | 22548343  | C                                       | T   | SNP | <i>EGR3</i>            | ENST00000317216 | -1 | silent                      | c.807             | p.P269               | tier1    | 276   | 0   | 0.000 | 562   | 25  | 0.043 |       |
| 222841 | 8  | 140768059 | 140768059 | A                                       | G   | SNP | <i>TRAPPC9</i>         | ENST00000389328 | -1 | intronic                    | c.3350-23614      | e22-23614            | tier3    | 92    | 1   | 0.011 | 159   | 22  | 0.122 |       |
| 222841 | 10 | 42949783  | 42949783  | C                                       | A   | SNP | <i>CCNYL2</i>          | ENST00000426433 | -1 | 5_prime_untranslated_region | c.-42949783       | NULL                 | tier3    | 97    | 4   | 0.039 | 137   | 38  | 0.216 |       |
| 222841 | 10 | 73497534  | 73497534  | C                                       | G   | SNP | <i>C10orf105</i>       | ENST00000398786 | -1 | 5_prime_untranslated_region | c.-21440          | NULL                 | tier3    | 294   | 0   | 0.000 | 505   | 26  | 0.049 |       |
| 222841 | 11 | 32444548  | 32444548  | C                                       | G   | SNP | <i>WT1</i>             | ENST00000332351 | -1 | intronic                    | c.872+4954        | e3+4954              | tier3    | 220   | 0   | 0.000 | 491   | 33  | 0.063 |       |
| 222841 | 12 | 49170094  | 49170094  | G                                       | A   | SNP | <i>ADCY6</i>           | ENST00000307885 | -1 | silent                      | c.1575            | p.N525               | tier1    | 412   | 2   | 0.005 | 742   | 31  | 0.040 |       |
| 222841 | 12 | 109604677 | 109604677 | C                                       | G   | SNP | <i>ACACB</i>           | ENST00000338432 | 1  | missense                    | c.665             | p.S222W              | missense | tier1 | 109 | 0     | 0.000 | 193 | 17    | 0.081 |
| 222841 | 13 | 36410159  | 36410159  | A                                       | T   | SNP | <i>DCLK1</i>           | ENST00000360631 | -1 | intronic                    | c.1229+11         | e7+11                | tier3    | 246   | 0   | 0.000 | 666   | 50  | 0.070 |       |
| 222841 | 16 | 81412314  | 81412314  | G                                       | C   | SNP | <i>GAN</i>             | ENST00000568107 | 1  | 3_prime_untranslated_region | c.*1113           | NULL                 | tier3    | 107   | 0   | 0.000 | 297   | 21  | 0.066 |       |
| 222841 | 17 | 7577568   | 7577568   | C                                       | T   | SNP | <i>TP53</i>            | ENST00000269305 | -1 | missense                    | c.713             | p.C238Y              | missense | tier1 | 803 | 19    | 0.023 | 873 | 482   | 0.355 |
| 222841 | 17 | 10350502  | 10350502  | C                                       | A   | SNP | <i>MYH4</i>            | ENST00000255381 | -1 | missense                    | c.4997            | p.R1666I             | missense | tier1 | 417 | 2     | 0.005 | 927 | 47    | 0.048 |
| 222841 | 17 | 10401122  | 10401122  | G                                       | C   | SNP | <i>MYH1</i>            | ENST00000226207 | -1 | missense                    | c.4294            | p.L1432V             | missense | tier1 | 323 | 0     | 0.000 | 628 | 21    | 0.032 |
| 222841 | 19 | 9176322   | 9176322   | G                                       | C   | SNP | <i>OR1M1</i>           | ENST00000429566 | 1  | 5_prime_flanking_region     | c.-27599          | NULL                 | missense | tier3 | 199 | 0     | 0.000 | 620 | 26    | 0.040 |
| 222841 | 22 | 40055124  | 40055124  | G                                       | C   | SNP | <i>CACNA1I</i>         | ENST00000336649 | 1  | splice_region               | c.2348+3          | e15+3                | missense | tier2 | 263 | 0     | 0.000 | 428 | 21    | 0.047 |
| 222841 | X  | 137714472 | 137714472 | A                                       | G   | SNP | <i>FGF13</i>           | ENST00000315930 | -1 | 3_prime_untranslated_region | c.*539            | NULL                 | missense | tier3 | 94  | 0     | 0.000 | 169 | 15    | 0.082 |
| 222841 | X  | 152801875 | 152801875 | G                                       | A   | SNP | <i>ATP2B3</i>          | ENST00000263519 | -1 | missense                    | c.170             | p.S57N               | missense | tier1 | 500 | 0     | 0.000 | 883 | 39    | 0.042 |
| 229276 | 1  | 15903     | 15904     | -                                       | C   | INS | <i>WASH7P</i>          | ENST00000438504 | -1 | splice_site_ins             | c.NULL            | c.NULL               | missense | tier1 | 7   | 0     | 0.000 | 2   | 12    | 0.857 |
| 229276 | 1  | 17084269  | 17084269  | G                                       | A   | SNP | <i>MST1L</i>           | ENST00000455405 | -1 | rna                         | NULL              | NULL                 | missense | tier1 | 141 | 3     | 0.021 | 378 | 42    | 0.100 |
| 229276 | 1  | 186647324 | 186647324 | T                                       | -   | DEL | <i>PTGS2</i>           | ENST00000367468 | -1 | intronic                    | c.457+69          | e4+69                | missense | tier3 | 33  | 0     | 0.000 | 73  | 18    | 0.198 |
| 229276 | 1  | 201172932 | 201172932 | C                                       | T   | SNP | <i>IGFN1</i>           | ENST00000335211 | 1  | missense                    | c.814             | p.R272C              | missense | tier1 | 71  | 0     | 0.000 | 116 | 26    | 0.183 |
| 229276 | 2  | 231974064 | 231974065 | -                                       | A   | INS | <i>HTR2B</i>           | ENST00000258400 | -1 | frame_shift_ins             | c.613_612         | p.I204fs             | missense | tier1 | 61  | 0     | 0.000 | 125 | 19    | 0.132 |
| 229276 | 3  | 38739967  | 38739967  | G                                       | A   | SNP | <i>SCN10A</i>          | ENST00000449082 | -1 | missense                    | c.4744            | p.R1582C             | missense | tier1 | 74  | 0     | 0.000 | 195 | 30    | 0.133 |
| 229276 | 3  | 53736702  | 53736702  | C                                       | T   | SNP | <i>CACNA1D</i>         | ENST00000288139 | 1  | missense                    | c.1255            | p.R419W              | missense | tier1 | 76  | 2     | 0.026 | 165 | 33    | 0.167 |
| 229276 | 3  | 68684184  | 68684184  | C                                       | T   | SNP | <i>ENSG00000244640</i> | ENST00000461635 | -1 | 5_prime_flanking_region     | c.-677            | NULL                 | missense | tier4 | 65  | 0     | 0.000 | 109 | 26    | 0.193 |
| 229276 | 4  | 15055756  | 15055756  | A                                       | G   | SNP | <i>CPEB2</i>           | ENST00000538197 | 1  | silent                      | c.2376            | p.E792               | missense | tier1 | 102 | 1     | 0.010 | 229 | 46    | 0.167 |
| 229276 | 4  | 36214995  | 36214995  | T                                       | C   | SNP | <i>ARAP2</i>           | ENST00000303965 | -1 | intronic                    | c.965-54          | e3-54                | missense | tier3 | 173 | 1     | 0.006 | 256 | 33    | 0.114 |
| 229276 | 4  | 39233719  | 39233720  | -                                       | A   | INS | <i>WDR19</i>           | ENST00000399820 | 1  | intronic                    | c.2143-63_2143-62 | e19-62               | missense | tier3 | 43  | 0     | 0.000 | 78  | 14    | 0.152 |
| 229276 | 4  | 39928393  | 39928393  | A                                       | T   | SNP | <i>PDS5A</i>           | ENST00000303538 | -1 | splice_site                 | c.429+2           | e3+2                 | missense | tier1 | 195 | 1     | 0.005 | 312 | 20    | 0.059 |
| 229276 | 4  | 95202758  | 95202758  | T                                       | A   | SNP | <i>SMARCAD1</i>        | ENST00000359052 | 1  | intronic                    | c.2732+17         | e20+17               | missense | tier3 | 64  | 0     | 0.000 | 85  | 12    | 0.124 |
| 229276 | 5  | 55237459  | 55237459  | A                                       | C   | SNP | <i>IL6ST</i>           | ENST00000336909 | -1 | silent                      | c.2208            | p.S736               | missense | tier1 | 77  | 1     | 0.013 | 162 | 26    | 0.138 |
| 229276 | 5  | 60170374  | 60170374  | A                                       | C   | SNP | <i>ERCC8</i>           | ENST00000462279 | -1 | rna                         | NULL              | NULL                 | missense | tier1 | 129 | 0     | 0.000 | 200 | 33    | 0.142 |
| 229276 | 6  | 30593399  | 30593399  | C                                       | A   | SNP | <i>MRPS18B</i>         | ENST00000259873 | 1  | missense                    | c.602             | p.P201Q              | missense | tier1 | 60  | 0     | 0.000 | 116 | 36    | 0.237 |
| 229276 | 6  | 52883236  | 52883236  | C                                       | T   | SNP | <i>ICK</i>             | ENST00000350082 | -1 | silent                      | c.555             | p.A185               | missense | tier1 | 99  | 0     | 0.000 | 196 | 33    | 0.144 |
| 229276 | 6  | 76022886  | 76022886  | G                                       | A   | SNP | <i>FILIP1</i>          | ENST00000237172 | -1 | missense                    | c.2662            | p.P888S              | missense | tier1 | 88  | 0     | 0.000 | 183 | 32    | 0.149 |
| 229276 | 6  | 88125414  | 88125414  | C                                       | T   | SNP | <i>C6orf165</i>        | ENST00000369562 | 1  | silent                      | c.294             | p.L98                | missense | tier1 | 169 | 0     | 0.000 | 273 | 45    | 0.142 |
| 229276 | 9  | 139997605 | 139997605 | A                                       | G   | SNP | <i>MAN1B1</i>          | ENST00000536349 | 1  | 3_prime_untranslated_region | c.*139997605      | NULL                 | missense | tier3 | 81  | 1     | 0.012 | 173 | 42    | 0.194 |
| 229276 | 9  | 139997644 | 139997644 | A                                       | G   | SNP | <i>MAN1B1</i>          | ENST00000536349 | 1  | 3_prime_untranslated_region | c.*139997644      | NULL                 | missense | tier3 | 75  | 3     | 0.039 | 141 | 50    | 0.254 |
| 229276 | 10 | 15177301  | 15177301  | A                                       | G   | SNP | <i>NMT2</i>            | ENST00000378165 | -1 | silent                      | c.363             | p.F121               | missense | tier1 | 30  | 0     | 0.000 | 38  | 14    | 0.269 |
| 229276 | 12 | 12006417  | 12006417  | -                                       | T   | INS | <i>ETV6</i>            | ENST00000396373 | 1  | frame_shift_ins             | c.385_386         | p.S131fs             | missense | tier1 | 379 | 7     | 0.018 | 618 | 110   | 0.151 |
| 229276 | 12 | 13229047  | 13229047  | A                                       | T   | SNP | <i>KIAA1467</i>        | ENST00000197268 | 1  | missense                    | c.1612            | p.N538Y              | missense | tier1 | 110 | 1     | 0.009 | 203 | 25    | 0.109 |
| 229276 | 12 | 64842427  | 64842427  | T                                       | A   | SNP | <i>XPOT</i>            | ENST00000332707 | 1  | 3_prime_untranslated_region | c.*516            | NULL                 | missense | tier4 | 120 | 0     | 0.000 | 133 | 27    | 0.169 |
| 229276 | 12 | 112657189 | 112657189 | C                                       | T   | SNP | <i>HECTD4</i>          | ENST00000377560 | -1 | splice_site                 | c.6558+1          | e43+1                | missense | tier1 | 35  | 0     | 0.000 | 66  | 17    | 0.205 |
| 229276 | 12 | 124082411 | 124082411 | G                                       | T   | SNP | <i>TMED2</i>           | ENST00000262225 | 1  | 3_prime_untranslated_region | c.*1135           | NULL                 | missense | tier3 | 33  | 0     | 0.000 | 64  | 14    | 0.175 |
| 229276 | 17 | 29553477  | 29553478  | -                                       | C   | INS | <i>NF1</i>             | ENST00000358273 | 1  | frame_shift_ins             | c.2026_2027       | p.I679fs             | missense | tier1 | 301 | 4     | 0.013 | 489 | 85    | 0.148 |
| 229276 | 19 | 36125240  | 36125240  | G                                       | A   | SNP | <i>RBM42</i>           | ENST00000262633 | 1  | missense                    | c.1100            | p.S367N              | missense | tier1 | 42  | 0     | 0.000 | 102 | 25    | 0.197 |
| 229276 | 21 | 36259295  | 36259316  | CAGCGCCGGCGTCC<br>GGGGCGCC<br>CCACGCCGG | -   | DEL | <i>RUNX1</i>           | ENST00000300305 | -1 | frame_shift_del             | c.196_175         | p.G59fs              | missense | tier1 | 460 | 0     | 0.000 | 933 | 41    | 0.042 |
| 229276 | X  | 2835999   | 2836007   | -                                       | DEL | DEL | <i>ARSD</i>            | ENST00000381154 | -1 | in_frame_del                | c.709_701         | p.AGV234in_frame_del | missense | tier1 | 31  | 0     | 0.000 | 59  | 14    | 0.192 |
| 229276 | X  | 39934092  | 39934092  | G                                       | -   | DEL | <i>BCOR</i>            | ENST00000378444 | -1 | frame_shift_del             | c.507             | p.D169fs             | missense | tier1 | 289 | 9     | 0.030 | 396 | 133   | 0.251 |
| 229276 | X  | 123179001 | 123179001 | A                                       | G   | SNP | <i>STAG2</i>           | ENST00000218089 | 1  | intronic                    | c.463-13          | e6-13                | missense | tier2 | 158 | 2     | 0.013 | 184 | 75    | 0.287 |
| 243777 | 1  | 3428641   | 3428641   | T                                       | C   | SNP | <i>MEGF6</i>           | ENST00000356575 | -1 | missense                    | c.905             | p.N302S              | missense | tier1 | 89  | 0     | 0.000 | 155 | 16    | 0.093 |
| 243777 | 1  | 24383863  | 24383863  | C                                       | T   | SNP | <i>MYOM3</i>           | ENST00000330966 | -1 | silent                      | c.4314            | p.K1438              | missense | tier1 | 274 | 9     | 0.032 | 435 | 137   | 0.238 |
| 243777 | 1  | 152082466 | 152082466 | A                                       | C   | SNP | <i>TCHH</i>            | ENST00000368804 | -1 | missense                    | c.3227            | p.L1076R             | missense | tier1 | 125 | 1     | 0.008 | 146 | 16    | 0.099 |
| 243777 | 1  | 230921753 | 230921753 | A                                       | G   | SNP | <i>CAPN9</i>           | ENST00000271971 | 1  | missense                    | c.1508            | p.D503G              | missense | tier1 | 208 | 0     | 0.000 | 337 | 16    | 0.045 |
| 243777 | 2  | 103       |           |                                         |     |     |                        |                 |    |                             |                   |                      |          |       |     |       |       |     |       |       |



|        |    |           |           |     |               |     |                        |                 |    |                             |                   |                   |       |     |    |       |      |     |       |
|--------|----|-----------|-----------|-----|---------------|-----|------------------------|-----------------|----|-----------------------------|-------------------|-------------------|-------|-----|----|-------|------|-----|-------|
| 243777 | 6  | 42985377  | 42985377  | G   | A             | SNP | <i>KLHDC3</i>          | ENST00000326974 | 1  | nonsense                    | c.275             | p.W92*            | tier1 | 63  | 0  | 0.000 | 137  | 21  | 0.133 |
| 243777 | 6  | 64290808  | 64290808  | A   | A             | SNP | <i>PTP4A1</i>          | ENST00000370651 | 1  | 3_prime_untranslated_region | c.*729            | NULL              | tier3 | 100 | 0  | 0.000 | 158  | 39  | 0.197 |
| 243777 | 7  | 135263622 | 135263622 | C   | G             | SNP | <i>NUP205</i>          | ENST00000285968 | 1  | missense                    | c.1001            | p.A334V           | tier1 | 151 | 5  | 0.032 | 216  | 55  | 0.202 |
| 243777 | 8  | 101522892 | 101522892 | A   | -             | DEL | <i>ANKRD46</i>         | ENST00000520552 | -1 | intronic                    | c.637-25          | e4-25             | tier3 | 38  | 0  | 0.000 | 48   | 10  | 0.172 |
| 243777 | 8  | 117859879 | 117859879 | G   | A             | SNP | <i>RAD21</i>           | ENST00000297338 | -1 | nonsense                    | c.1756            | p.R586*           | tier1 | 810 | 5  | 0.006 | 1188 | 130 | 0.099 |
| 243777 | 9  | 108125237 | 108125237 | G   | A             | SNP | <i>SLC44A1</i>         | ENST00000374720 | 1  | missense                    | c.1036            | p.V346I           | tier1 | 123 | 0  | 0.000 | 203  | 50  | 0.198 |
| 243777 | 10 | 54076396  | 54076396  | T   | C             | SNP | <i>DKK1</i>            | ENST00000373970 | 1  | silent                      | c.630             | p.C210            | tier1 | 71  | 1  | 0.014 | 75   | 33  | 0.306 |
| 243777 | 10 | 135350563 | 135350563 | G   | T             | SNP | <i>CYP2E1</i>          | ENST00000252945 | 1  | splice_region               | c.968-4           | e7-4              | tier3 | 51  | 0  | 0.000 | 85   | 19  | 0.183 |
| 243777 | 11 | 67552796  | 67552796  | G   | T             | SNP | <i>ALG1L8P</i>         | ENST00000533887 | 1  | 3_prime_untranslated_region | c.*67552796       | NULL              | tier3 | 97  | 0  | 0.000 | 146  | 46  | 0.240 |
| 243777 | 11 | 71175151  | 71175151  | C   | A             | SNP | <i>NADSYN1</i>         | ENST00000319023 | 1  | missense                    | c.370             | p.R124S           | tier1 | 40  | 0  | 0.000 | 39   | 17  | 0.304 |
| 243777 | 11 | 108188267 | 108188267 | T   | -             | DEL | <i>ATM</i>             | ENST00000278616 | 1  | intronic                    | c.6347+19         | e42+19            | tier3 | 39  | 0  | 0.000 | 69   | 13  | 0.159 |
| 243777 | 11 | 132081872 | 132081872 | T   | A             | SNP | <i>NTM</i>             | ENST00000539799 | 1  | intronic                    | c.401-44          | e4-44             | tier3 | 85  | 2  | 0.023 | 91   | 25  | 0.216 |
| 243777 | 12 | 11992117  | 11992117  | G   | A             | SNP | <i>ETV6</i>            | ENST00000396373 | 1  | nonsense                    | c.207             | p.W69*            | tier1 | 566 | 3  | 0.005 | 876  | 122 | 0.122 |
| 243777 | 16 | 12297010  | 12297010  | T   | G             | SNP | <i>SNX29</i>           | ENST00000306030 | 1  | intronic                    | c.523+3470        | e6+3470           | tier3 | 265 | 3  | 0.011 | 510  | 36  | 0.066 |
| 243777 | 16 | 51175096  | 51175096  | G   | A             | SNP | <i>SALL1</i>           | ENST00000251020 | -1 | missense                    | c.1037            | p.A346V           | tier1 | 77  | 1  | 0.013 | 97   | 32  | 0.248 |
| 243777 | 17 | 10305158  | 10305158  | -   | T             | INS | <i>MYH8</i>            | ENST00000403437 | -1 | intronic                    | c.2689-57_2689-56 | e21-56            | tier3 | 168 | 2  | 0.012 | 223  | 46  | 0.171 |
| 243777 | 17 | 10451010  | 10451010  | G   | A             | SNP | <i>MYH2</i>            | ENST00000245503 | -1 | intronic                    | c.204+24          | e1+24             | tier3 | 156 | 2  | 0.013 | 268  | 63  | 0.190 |
| 243777 | 17 | 62399159  | 62399160  | -   | T             | INS | <i>RPL31P57</i>        | ENST00000461109 | -1 | 5_prime_flanking_region     | c.-13109          | NULL              | tier3 | 85  | 0  | 0.000 | 103  | 37  | 0.264 |
| 243777 | 17 | 78313118  | 78313118  | C   | G             | SNP | <i>RNF213</i>          | ENST00000582970 | 1  | missense                    | c.4951            | p.L1651V          | tier1 | 565 | 18 | 0.031 | 806  | 234 | 0.225 |
| 243777 | 18 | 42531917  | 42531917  | T   | C             | SNP | <i>SETBP1</i>          | ENST00000282030 | 1  | missense                    | c.2612            | p.I871T           | tier1 | 545 | 3  | 0.006 | 951  | 30  | 0.031 |
| 243777 | 18 | 77896475  | 77896475  | A   | T             | SNP | <i>ADNP2</i>           | ENST00000262198 | 1  | missense                    | c.3179            | p.D1060V          | tier1 | 123 | 5  | 0.039 | 159  | 77  | 0.326 |
| 243777 | 19 | 1525633   | 1525633   | C   | T             | SNP | <i>PLK5</i>            | ENST00000334770 | 1  | 5_prime_untranslated_region | c.-1363           | NULL              | tier2 | 92  | 0  | 0.000 | 119  | 62  | 0.343 |
| 243777 | 19 | 51358189  | 51358189  | T   | A             | SNP | <i>KLK3</i>            | ENST00000326003 | 1  | 5_prime_untranslated_region | c.-23             | NULL              | tier3 | 81  | 1  | 0.012 | 100  | 43  | 0.301 |
| 243777 | 19 | 57722941  | 57722941  | A   | G             | SNP | <i>ZNF264</i>          | ENST00000263095 | 1  | missense                    | c.476             | p.D159G           | tier1 | 89  | 0  | 0.000 | 143  | 21  | 0.128 |
| 243777 | 20 | 3214593   | 3214593   | C   | T             | SNP | <i>SLC4A11</i>         | ENST00000380059 | -1 | silent                      | c.708             | p.R236            | tier1 | 67  | 1  | 0.015 | 95   | 34  | 0.264 |
| 243777 | 20 | 31022762  | 31022762  | C   | -             | DEL | <i>ASXL1</i>           | ENST00000375687 | 1  | frame_shift_del             | c.2247            | p.V751fs          | tier1 | 718 | 15 | 0.021 | 939  | 327 | 0.258 |
| 243777 | 21 | 9755905   | 9755905   | A   | G             | SNP | -                      | -               | -  | -                           | -                 | -                 | tier3 | 31  | 0  | 0.000 | 72   | 33  | 0.314 |
| 243777 | 21 | 44514777  | 44514777  | T   | G             | SNP | <i>U2AF1</i>           | ENST00000291552 | -1 | missense                    | c.470             | p.Q157P           | tier1 | 314 | 5  | 0.016 | 477  | 121 | 0.202 |
| 266995 | 1  | 24417462  | 24417462  | C   | A             | SNP | <i>MYOM3</i>           | ENST00000330966 | -1 | missense                    | c.1260            | p.W420C           | tier1 | 329 | 1  | 0.003 | 901  | 40  | 0.043 |
| 266995 | 1  | 181706618 | 181706618 | G   | A             | SNP | <i>CACNA1E</i>         | ENST00000367573 | 1  | intronic                    | c.3423-43         | e23-43            | tier3 | 354 | 0  | 0.000 | 511  | 43  | 0.077 |
| 266995 | 2  | 152267722 | 152267722 | T   | -             | DEL | <i>RIF1</i>            | ENST00000243326 | 1  | intronic                    | c.105-52          | e2-52             | tier2 | 20  | 0  | 0.000 | 12   | 7   | 0.368 |
| 266995 | 3  | 14239517  | 14239518  | -   | T             | INS | <i>LSM3</i>            | ENST00000306024 | 1  | intronic                    | c.229-19_229-18   | e4-18             | tier2 | 88  | 0  | 0.000 | 114  | 13  | 0.102 |
| 266995 | 3  | 39230412  | 39230412  | C   | T             | SNP | <i>XIRP1</i>           | ENST00000340369 | -1 | silent                      | c.525             | p.L175            | tier1 | 530 | 2  | 0.004 | 988  | 64  | 0.061 |
| 266995 | 3  | 100463779 | 100463779 | A   | G             | SNP | <i>TFG</i>             | ENST00000240851 | 1  | splice_region               | c.820+4           | e6+4              | tier3 | 107 | 1  | 0.009 | 185  | 21  | 0.102 |
| 266995 | 3  | 137981440 | 137981440 | A   | -             | DEL | <i>ARMC8</i>           | ENST00000469044 | 1  | intronic                    | c.1135-1141       | e13-1141          | tier4 | 58  | 0  | 0.000 | 60   | 9   | 0.130 |
| 266995 | 6  | 132067939 | 132067939 | A   | G             | SNP | <i>ENPP3</i>           | ENST00000357639 | 1  | missense                    | c.2471            | p.E824G           | tier1 | 140 | 0  | 0.000 | 200  | 16  | 0.074 |
| 266995 | 7  | 129028858 | 129028858 | T   | -             | DEL | <i>AHCYL2</i>          | ENST00000491079 | 1  | 3_prime_untranslated_region | c.*129028858      | NULL              | tier3 | 86  | 1  | 0.012 | 104  | 14  | 0.119 |
| 266995 | 8  | 80948699  | 80948699  | C   | A             | SNP | <i>TPD52</i>           | ENST00000518937 | -1 | 3_prime_untranslated_region | c.*1652           | NULL              | tier3 | 112 | 0  | 0.000 | 106  | 9   | 0.078 |
| 266995 | 8  | 139736829 | 139736829 | G   | A             | SNP | <i>COL22A1</i>         | ENST00000303045 | -1 | intronic                    | c.2247+29         | e24+29            | tier3 | 65  | 0  | 0.000 | 91   | 17  | 0.157 |
| 266995 | 10 | 95720906  | 95720906  | G   | A             | SNP | <i>PIPSL</i>           | ENST00000480546 | -1 | rna                         | NULL              | NULL              | tier1 | 161 | 0  | 0.000 | 270  | 18  | 0.063 |
| 266995 | 12 | 25398262  | 25398262  | G   | G             | SNP | <i>KRAS</i>            | ENST00000256078 | -1 | missense                    | c.57              | p.L19F            | tier1 | 478 | 0  | 0.000 | 750  | 46  | 0.058 |
| 266995 | 12 | 54369181  | 54369181  | C   | C             | SNP | <i>HOXC11</i>          | ENST00000546378 | 1  | missense                    | c.899             | p.G300A           | tier1 | 184 | 0  | 0.000 | 339  | 18  | 0.050 |
| 266995 | 12 | 133050261 | 133050261 | G   | A             | SNP | <i>MUC8</i>            | ENST00000595994 | -1 | silent                      | c.183             | p.L61             | tier1 | 130 | 0  | 0.000 | 129  | 12  | 0.085 |
| 266995 | 13 | 101762936 | 101762936 | G   | A             | SNP | <i>NALCN</i>           | ENST00000251127 | -1 | intronic                    | c.2364+34         | e19+34            | tier2 | 390 | 2  | 0.005 | 454  | 47  | 0.094 |
| 266995 | 13 | 101910940 | 101910940 | C   | G             | SNP | <i>NALCN</i>           | ENST00000251127 | -1 | intronic                    | c.1135-15         | e10-15            | tier3 | 234 | 0  | 0.000 | 381  | 34  | 0.081 |
| 266995 | 15 | 101844339 | 101844339 | C   | G             | SNP | <i>ENSG00000259172</i> | ENST00000558838 | 1  | rna                         | NULL              | NULL              | tier1 | 114 | 0  | 0.000 | 179  | 17  | 0.087 |
| 266995 | 16 | 81941970  | 81941970  | C   | A             | SNP | <i>PLCG2</i>           | ENST00000359376 | 1  | intronic                    | c.1558-51         | e16-51            | tier3 | 113 | 0  | 0.000 | 199  | 15  | 0.070 |
| 266995 | 18 | 14830201  | 14830201  | C   | G             | SNP | <i>MIR3156-2</i>       | ENST00000581101 | 1  | rna                         | NULL              | NULL              | tier1 | 243 | 0  | 0.000 | 247  | 12  | 0.046 |
| 266995 | 19 | 9057573   | 9057573   | G   | A             | SNP | <i>MUC16</i>           | ENST00000397910 | -1 | missense                    | c.29873           | p.T9958I          | tier1 | 734 | 0  | 0.000 | 1536 | 68  | 0.042 |
| 266995 | X  | 107811978 | 107811978 | G   | A             | SNP | <i>COL4A5</i>          | ENST00000328300 | 1  | intronic                    | c.322-11          | e6-11             | tier3 | 220 | 0  | 0.000 | 320  | 28  | 0.080 |
| 270086 | 6  | 56473262  | 56473262  | G   | A             | SNP | <i>DST</i>             | ENST00000370754 | -1 | missense                    | c.6065            | p.T2022I          | tier1 | 777 | 0  | 0.000 | 1084 | 44  | 0.039 |
| 270086 | 7  | 114563154 | 114563154 | C   | A             | SNP | <i>MDFIC</i>           | ENST00000393486 | 1  | silent                      | c.66              | p.G22             | tier1 | 6   | 0  | 0.000 | 1    | 8   | 0.889 |
| 270086 | 9  | 35906348  | 35906350  | CTG | -             | DEL | <i>HRCT1</i>           | ENST00000354323 | 1  | in_frame_del                | c.64_66           | p.L25in_frame_del | tier1 | 74  | 0  | 0.000 | 89   | 11  | 0.110 |
| 270086 | 14 | 23567883  | 23567883  | A   | T             | SNP | <i>C14orf119</i>       | ENST00000319074 | 1  | 3_prime_untranslated_region | c.*593            | NULL              | tier4 | 86  | 0  | 0.000 | 124  | 13  | 0.095 |
| 270086 | 19 | 633529    | 633530    | -   | GCGCCGCCGCCGC | INS | <i>POLRMT</i>          | ENST00000588649 | -1 | 5_prime_untranslated_region | c.-17             | NULL              | tier2 | 16  | 0  | 0.000 | 16   | 10  | 0.385 |
| 270086 | 19 | 4817310   | 4817310   | A   | C             | SNP | <i>TICAM1</i>          | ENST00000248244 | -1 | silent                      | c.1080            | p.P360            | tier1 | 186 | 2  | 0.011 | 256  | 24  | 0.085 |
| 270086 | 21 | 14469103  | 14469103  | G   | A             | SNP | <i>ZNF355P</i>         | ENST00000427301 | -1 | 5_prime_untranslated_region | c.-14469103       | NULL              | tier3 | 347 | 0  | 0.000 | 347  | 15  | 0.041 |
| 272848 | 1  | 145684679 | 145684679 | G   | A             | SNP | <i>RNF115</i>          | ENST00000369291 | 1  | splice_site                 | c.667+1           | e7+1              | tier1 | 48  | 2  | 0.039 | 118  | 60  | 0.337 |
| 272848 | 2  | 65497525  | 65497525  | A   | G             | SNP | <i>ACTR2</i>           | ENST00000260641 | 1  | 3_prime_untranslated_region | c.*1657           | NULL              | tier3 | 46  | 0  | 0.000 | 62   | 43  | 0.410 |
| 272848 | 2  | 90109121  | 90109121  | G   | A             | SNP | <i>IGKV1D-17</i>       | ENST00000483379 | 1  | 5_prime_flanking_region     | c.-12537          | NULL              | tier3 | 49  | 0  | 0.000 | 81   | 46  | 0.362 |
| 272848 | 2  | 144159094 | 144159094 | A   | T             | SNP | <i>ARHGAP15</i>        | ENST00000295095 | 1  | intronic                    | c.475-34076       | e6-34076          | tier2 | 19  | 0  | 0.000 | 78   | 36  | 0.316 |
| 272848 | 3  | 37095520  | 37095520  | A   | G             | SNP | <i>LRRFIP2</i>         | ENST00000336686 | -1 | intronic                    | c.2056-68         | e27-68            | tier3 | 29  | 0  | 0.000 | 26   | 28  | 0.519 |
| 272848 | 3  | 39453515  | 39453515  | A   | G             | SNP | <i>RPSA</i>            | ENST00000301821 | 1  | silent                      | c.756             | p.V252            | tier1 | 62  | 0  | 0.000 | 118  | 17  | 0.126 |
| 272848 | 3  | 41722946  | 41722946  | G   | -             | DEL | <i>ULK4</i>            | ENST00000301831 | -1 | intronic                    | c.2978+53         | e28+53            | tier3 | 40  | 0  | 0.000 | 57   | 32  | 0.360 |
| 272848 | 4  | 3891295   | 3891295   | C   | T             | SNP | <i>OR7E163P</i>        | ENST00000505943 | -1 | 5_prime_untranslated_region | c.-3891295        | NULL              | tier3 | 43  | 0  | 0.000 | 67   | 35  | 0.343 |
| 272848 | 4  | 85654560  | 85654560  | T   | A             | SNP | <i>WDFY3</i>           | ENST00000295888 | -1 | missense                    | c.7196            | p.E2399V          | tier1 | 48  | 0  | 0.000 | 47   | 49  | 0.510 |
| 272848 | 4  | 140619263 | 140619263 | T   | A             | SNP | <i>MGST2</i>           | ENST00000265498 | 1  | intronic                    | c.229+2842        | e3+2842           | tier3 | 50  | 0  | 0.000 | 105  | 16  |       |

|        |    |           |           |                          |   |     |                 |                 |    |                             |                   |           |       |     |   |       |      |     |       |
|--------|----|-----------|-----------|--------------------------|---|-----|-----------------|-----------------|----|-----------------------------|-------------------|-----------|-------|-----|---|-------|------|-----|-------|
| 272848 | 8  | 100523442 | 100523442 | G                        | C | SNP | VPS13B          | ENST00000358544 | 1  | missense                    | c.4410            | p.E1470D  | tier1 | 47  | 0 | 0.000 | 70   | 59  | 0.457 |
| 272848 | 9  | 35480204  | 35480204  | C                        | T | SNP | ATP8B5P         | ENST00000329395 | 1  | rna                         | NULL              | NULL      | tier1 | 44  | 0 | 0.000 | 18   | 23  | 0.561 |
| 272848 | 9  | 66457014  | 66457014  | C                        | T | SNP | LOC100966870    | ENST00000424345 | 1  | 5_prime_flanking_region     | c.-275            | NULL      | tier4 | 45  | 0 | 0.000 | 69   | 14  | 0.169 |
| 272848 | 9  | 115932843 | 115932843 | T                        | C | SNP | FKBP15          | ENST00000238256 | -1 | missense                    | c.2725            | p.N909D   | tier1 | 55  | 1 | 0.018 | 84   | 25  | 0.227 |
| 272848 | 9  | 136634584 | 136634584 | C                        | T | SNP | VAV2            | ENST00000371850 | -1 | missense                    | c.2389            | p.G797S   | tier1 | 39  | 0 | 0.000 | 59   | 36  | 0.379 |
| 272848 | 10 | 69695996  | 69695996  | T                        | C | SNP | HERC4           | ENST00000395198 | -1 | splice_region               | c.2596-4          | e21-4     | tier4 | 37  | 0 | 0.000 | 58   | 44  | 0.431 |
| 272848 | 10 | 99660362  | 99660362  | C                        | T | SNP | CRTAC1          | ENST00000370597 | -1 | intronic                    | c.1133+898        | e8+898    | tier3 | 248 | 2 | 0.008 | 252  | 256 | 0.503 |
| 272848 | 11 | 9081984   | 9081984   | G                        | C | SNP | SCUBE2          | ENST00000457346 | -1 | missense                    | c.938             | p.T313S   | tier1 | 50  | 1 | 0.020 | 54   | 32  | 0.372 |
| 272848 | 11 | 51411669  | 51411669  | C                        | T | SNP | OR4A5           | ENST00000319760 | -1 | missense                    | c.727             | p.V243I   | tier1 | 40  | 0 | 0.000 | 60   | 17  | 0.218 |
| 272848 | 11 | 85988219  | 85988219  | A                        | G | SNP | EED             | ENST00000525244 | 1  | 3_prime_untranslated_region | c.*85988219       | NULL      | tier3 | 62  | 0 | 0.000 | 169  | 148 | 0.467 |
| 272848 | 12 | 58159282  | 58159282  | C                        | T | SNP | CYP27B1         | ENST00000546609 | -1 | missense                    | c.299             | p.R100Q   | tier1 | 47  | 0 | 0.000 | 40   | 31  | 0.437 |
| 272848 | 15 | 41634594  | 41634594  | T                        | A | SNP | NUSAP1          | ENST00000559596 | 1  | nonsense                    | c.104             | p.L35*    | tier1 | 35  | 0 | 0.000 | 69   | 44  | 0.389 |
| 272848 | 16 | 16272771  | 16272771  | C                        | T | SNP | ABCC6           | ENST00000205557 | -1 | missense                    | c.2299            | p.V767I   | tier1 | 50  | 0 | 0.000 | 80   | 17  | 0.175 |
| 272848 | 16 | 30793418  | 30793418  | T                        | - | DEL | ZNF629          | ENST00000262525 | -1 | frame_shift_del             | c.2231            | p.K744fs  | tier1 | 45  | 0 | 0.000 | 43   | 35  | 0.449 |
| 272848 | 16 | 31090611  | 31090611  | C                        | T | SNP | ZNF646          | ENST00000300850 | 1  | missense                    | c.2966            | p.A989V   | tier1 | 59  | 0 | 0.000 | 74   | 52  | 0.413 |
| 272848 | 16 | 53529201  | 53529201  | C                        | T | SNP | AKTIP           | ENST00000300245 | -1 | missense                    | c.286             | p.V96M    | tier1 | 30  | 0 | 0.000 | 57   | 41  | 0.418 |
| 272848 | 16 | 87870085  | 87870085  | C                        | T | SNP | SLC7A5          | ENST00000261622 | -1 | intronic                    | c.1290+19         | e8+19     | tier3 | 49  | 0 | 0.000 | 65   | 25  | 0.278 |
| 272848 | 17 | 33476023  | 33476023  | G                        | A | SNP | UNC45B          | ENST00000268876 | 1  | missense                    | c.200             | p.S67Y    | tier1 | 32  | 0 | 0.000 | 41   | 24  | 0.369 |
| 272848 | 18 | 42531907  | 42531907  | C                        | A | SNP | SETBP1          | ENST00000282030 | 1  | missense                    | c.2602            | p.D868N   | tier1 | 367 | 0 | 0.000 | 609  | 133 | 0.179 |
| 272848 | 18 | 42531913  | 42531913  | G                        | T | SNP | SETBP1          | ENST00000282030 | 1  | missense                    | c.2608            | p.G870C   | tier1 | 367 | 0 | 0.000 | 527  | 189 | 0.264 |
| 272848 | 19 | 4310495   | 4310495   | G                        | A | SNP | FSD1            | ENST00000221856 | 1  | missense                    | c.392             | p.R131Q   | tier1 | 36  | 0 | 0.000 | 56   | 42  | 0.429 |
| 272848 | 19 | 19351506  | 19351506  | G                        | C | SNP | NCAN            | ENST00000252575 | 1  | intronic                    | c.3492+12         | e11+12    | tier3 | 40  | 0 | 0.000 | 41   | 29  | 0.414 |
| 272848 | 21 | 46957834  | 46957834  | C                        | T | SNP | SLC19A1         | ENST00000311124 | -1 | missense                    | c.40              | p.V14M    | tier1 | 53  | 0 | 0.000 | 58   | 38  | 0.396 |
| 272848 | X  | 12739552  | 12739552  | G                        | T | SNP | FRMPD4          | ENST00000380682 | 1  | 3_prime_untranslated_region | c.*900            | NULL      | tier3 | 19  | 0 | 0.000 | 29   | 15  | 0.341 |
| 272848 | X  | 77224984  | 77224984  | T                        | C | SNP | PGAM4           | ENST00000458128 | -1 | missense                    | c.152             | p.E51G    | tier1 | 81  | 0 | 0.000 | 55   | 36  | 0.391 |
| 272848 | X  | 120008710 | 120008710 | T                        | G | SNP | CT47B1          | ENST00000371311 | -1 | intronic                    | c.775+40          | e1+40     | tier2 | 74  | 0 | 0.000 | 78   | 42  | 0.347 |
| 272848 | X  | 145701712 | 145701712 | G                        | A | SNP | ENSG00000231686 | ENST00000445173 | -1 | 5_prime_untranslated_region | c.-145701712      | NULL      | tier2 | 50  | 0 | 0.000 | 39   | 30  | 0.435 |
| 275454 | 1  | 1920435   | 1920435   | A                        | - | DEL | C1orf222        | ENST00000434971 | -1 | intronic                    | c.68-23           | e2-23     | tier3 | 95  | 0 | 0.000 | 165  | 18  | 0.098 |
| 275454 | 5  | 37212598  | 37212598  | A                        | - | DEL | C5orf42         | ENST00000425232 | -1 | intronic                    | c.2920+1063       | e15+1063  | tier3 | 43  | 0 | 0.000 | 82   | 14  | 0.146 |
| 275454 | 5  | 65475096  | 65475096  | T                        | - | DEL | SREK1           | ENST00000284041 | 1  | rna                         | NULL              | NULL      | tier1 | 81  | 0 | 0.000 | 126  | 15  | 0.106 |
| 275454 | 5  | 131607200 | 131607200 | C                        | T | SNP | PDLIM4          | ENST00000462597 | 1  | 3_prime_untranslated_region | c.*131607200      | NULL      | tier2 | 131 | 0 | 0.000 | 234  | 15  | 0.060 |
| 275454 | 5  | 161579342 | 161579342 | G                        | A | SNP | GABRG2          | ENST00000356592 | 1  | intronic                    | c.1152+583        | e9+583    | tier3 | 151 | 0 | 0.000 | 286  | 17  | 0.056 |
| 275454 | 12 | 107237614 | 107237615 | -                        | T | INS | RIC8B           | ENST00000392837 | 1  | intronic                    | c.1066-16_1066-15 | e6-15     | tier3 | 73  | 1 | 0.014 | 117  | 23  | 0.164 |
| 275454 | 12 | 123107166 | 123107166 | A                        | - | DEL | KNTC1           | ENST00000333479 | 1  | intronic                    | c.6515+12         | e61+12    | tier3 | 54  | 0 | 0.000 | 77   | 16  | 0.172 |
| 275454 | 14 | 19807134  | 19807134  | G                        | T | SNP | OR11H13P        | ENST00000359695 | -1 | 5_prime_untranslated_region | c.-19807134       | NULL      | tier3 | 618 | 1 | 0.002 | 1105 | 29  | 0.026 |
| 275454 | 18 | 14809914  | 14809914  | C                        | G | SNP | ANKRD30B        | ENST00000358984 | 1  | intronic                    | c.2313+1336       | e25+1336  | tier3 | 206 | 0 | 0.000 | 352  | 19  | 0.051 |
| 280837 | 1  | 1669668   | 1669668   | G                        | C | SNP | SLC35E2         | ENST00000246421 | -1 | intronic                    | c.586+92          | e3+92     | tier2 | 17  | 0 | 0.000 | 127  | 97  | 0.433 |
| 280837 | 1  | 27861349  | 27861349  | T                        | G | SNP | AHDC1           | ENST00000482400 | -1 | 5_prime_untranslated_region | c.-27861349       | NULL      | tier3 | 32  | 1 | 0.030 | 96   | 43  | 0.309 |
| 280837 | 1  | 28605680  | 28605680  | G                        | A | SNP | SESN2           | ENST00000253063 | 1  | silent                      | c.1284            | p.V428    | tier1 | 29  | 0 | 0.000 | 103  | 86  | 0.453 |
| 280837 | 1  | 71998450  | 71998450  | C                        | T | SNP | NEGR1           | ENST00000357731 | -1 | intronic                    | c.940+60050       | e6+60050  | tier3 | 63  | 2 | 0.031 | 123  | 70  | 0.363 |
| 280837 | 1  | 151675014 | 151675014 | A                        | C | SNP | CELF3           | ENST00000470688 | -1 | 5_prime_untranslated_region | c.-151675014      | NULL      | tier2 | 87  | 2 | 0.022 | 199  | 35  | 0.150 |
| 280837 | 1  | 161976283 | 161976283 | G                        | A | SNP | OLFML2B         | ENST00000294794 | -1 | intronic                    | c.547-20          | e4-20     | tier3 | 47  | 4 | 0.078 | 32   | 37  | 0.507 |
| 280837 | 2  | 25467497  | 25467497  | G                        | A | SNP | DNMT3A          | ENST00000264709 | -1 | nonsense                    | c.1579            | p.Q527*   | tier1 | 122 | 5 | 0.039 | 622  | 489 | 0.437 |
| 280837 | 2  | 131453866 | 131453866 | T                        | C | SNP | ENSG00000240253 | ENST00000425151 | 1  | intronic                    | c.NULL            | NULL      | tier3 | 42  | 1 | 0.023 | 74   | 62  | 0.456 |
| 280837 | 2  | 234184342 | 234184342 | G                        | A | SNP | ATG16L1         | ENST00000392017 | 1  | intronic                    | c.954+918         | e9+918    | tier4 | 50  | 1 | 0.020 | 119  | 40  | 0.252 |
| 280837 | 3  | 118913221 | 118913221 | C                        | T | SNP | UPK1B           | ENST00000264234 | 1  | silent                      | c.624             | p.G208    | tier1 | 59  | 0 | 0.000 | 103  | 100 | 0.490 |
| 280837 | 4  | 1949812   | 1949812   | A                        | C | SNP | WHSC1           | ENST00000398261 | 1  | 3_prime_untranslated_region | c.*5684           | NULL      | tier3 | 49  | 0 | 0.000 | 67   | 65  | 0.492 |
| 280837 | 4  | 71888174  | 71888174  | G                        | T | SNP | DCK             | ENST00000286648 | 1  | missense                    | c.298             | p.A100S   | tier1 | 88  | 2 | 0.022 | 121  | 102 | 0.453 |
| 280837 | 4  | 76817552  | 76817552  | G                        | C | SNP | PPEF2           | ENST00000511880 | -1 | 5_prime_untranslated_region | c.-74             | NULL      | tier2 | 21  | 0 | 0.000 | 90   | 71  | 0.438 |
| 280837 | 4  | 109769882 | 109769882 | C                        | T | SNP | COL25A1         | ENST00000399132 | -1 | intronic                    | c.1434+33         | e26+33    | tier3 | 80  | 0 | 0.000 | 92   | 58  | 0.384 |
| 280837 | 5  | 34190834  | 34190834  | G                        | A | SNP | ENSG00000215156 | ENST00000332686 | 1  | 3_prime_untranslated_region | c.*34190834       | NULL      | tier3 | 525 | 2 | 0.004 | 6549 | 156 | 0.023 |
| 280837 | 5  | 36958149  | 36958156  | GTCTTCTT                 | - | DEL | NIPBL           | ENST00000282516 | 1  | intronic                    | c.231-57_231-50   | e3-50     | tier3 | 32  | 0 | 0.000 | 33   | 14  | 0.298 |
| 280837 | 5  | 36958159  | 36958178  | GAATCAGTCACCATT<br>TTAAT | - | DEL | NIPBL           | ENST00000282516 | 1  | intronic                    | c.231-47_231-28   | e3-28     | tier3 | 33  | 0 | 0.000 | 34   | 14  | 0.292 |
| 280837 | 5  | 74712651  | 74712651  | C                        | A | SNP | COL4A3BP        | ENST00000380494 | -1 | intronic                    | c.1221+50         | e8+50     | tier3 | 177 | 2 | 0.011 | 148  | 111 | 0.429 |
| 280837 | 6  | 33136506  | 33136506  | C                        | T | SNP | COL11A2         | ENST00000341947 | -1 | missense                    | c.3883            | p.E1295K  | tier1 | 31  | 0 | 0.000 | 192  | 144 | 0.427 |
| 280837 | 6  | 36698561  | 36698561  | C                        | A | SNP | P116            | ENST00000536757 | 1  | intronic                    | c.1+17544         | e0+17544  | tier4 | 13  | 0 | 0.000 | 40   | 40  | 0.500 |
| 280837 | 7  | 1055741   | 1055741   | A                        | G | SNP | C7orf50         | ENST00000357429 | -1 | intronic                    | c.130-5962        | e2-5962   | tier4 | 25  | 0 | 0.000 | 93   | 35  | 0.273 |
| 280837 | 7  | 1055742   | 1055742   | G                        | C | SNP | C7orf50         | ENST00000357429 | -1 | intronic                    | c.130-5963        | e2-5963   | tier4 | 26  | 0 | 0.000 | 91   | 37  | 0.287 |
| 280837 | 7  | 75050891  | 75050891  | T                        | C | SNP | POM121C         | ENST00000257665 | -1 | missense                    | c.3370            | p.T1124A  | tier1 | 23  | 0 | 0.000 | 33   | 31  | 0.477 |
| 280837 | 7  | 128553132 | 128553132 | T                        | C | SNP | ENSG00000224163 | ENST00000433622 | -1 | 5_prime_untranslated_region | c.-128553132      | NULL      | tier3 | 23  | 0 | 0.000 | 23   | 20  | 0.465 |
| 280837 | 7  | 150714308 | 150714308 | C                        | T | SNP | ATG9B           | ENST00000377974 | -1 | 5_prime_untranslated_region | c.-150714308      | NULL      | tier2 | 33  | 0 | 0.000 | 107  | 42  | 0.280 |
| 280837 | 7  | 157509090 | 157509090 | A                        | G | SNP | PTPRN2          | ENST00000404321 | -1 | intronic                    | c.1858-33461      | e13-33461 | tier3 | 27  | 0 | 0.000 | 52   | 15  | 0.224 |
| 280837 | 7  | 157509091 | 157509091 | C                        | T | SNP | PTPRN2          | ENST00000404321 | -1 | intronic                    | c.1858-33462      | e13-33462 | tier3 | 27  | 0 | 0.000 | 54   | 19  | 0.260 |
| 280837 | 7  | 157651592 | 157651592 | C                        | T | SNP | PTPRN2          | ENST00000404321 | -1 | intronic                    | c.1857+39773      | e12+39773 | tier3 | 80  | 1 | 0.012 | 325  | 43  | 0.117 |
| 280837 | 8  | 131129068 | 131129068 | G                        | T | SNP | ASAP1           | ENST00000343135 | -1 | intronic                    | c.2005+58         | e21+58    | tier3 | 80  | 0 | 0.000 | 128  | 116 | 0.474 |
| 280837 | 9  | 139903977 | 139903977 | C                        | A | SNP | ABCA2           | ENST00000355090 | -1 | intronic                    | c.6824+16         | e44+16    | tier2 | 33  | 0 | 0.000 | 191  | 175 | 0.478 |
| 280837 | 10 | 38651191  | 38651191  | G                        | A | SNP | HSD17B7P2       | ENST00000494540 | 1  | 3_prime_untranslated_region | c.*38651191       | NULL      | tier3 | 142 | 2 | 0.014 | 173  | 151 | 0.466 |
| 280837 | 10 | 68139043  | 68139043  | T                        | C | SNP | CTNNA3          | ENST00000373744 | -1 | silent                      | c.1599            |           |       |     |   |       |      |     |       |

|        |    |           |           |   |     |     |                 |                 |    |                             |                   |          |       |      |    |       |      |     |       |
|--------|----|-----------|-----------|---|-----|-----|-----------------|-----------------|----|-----------------------------|-------------------|----------|-------|------|----|-------|------|-----|-------|
| 280837 | 12 | 50344754  | 50344754  | G | A   | SNP | AQP2            | ENST00000199280 | 1  | silent                      | c.141             | p.A47    | tier1 | 30   | 0  | 0.000 | 143  | 120 | 0.456 |
| 280837 | 17 | 1563288   | 1563288   | T | A   | SNP | PRPF8           | ENST00000304992 | -1 | missense                    | c.4793            | p.D1598V | tier1 | 87   | 1  | 0.011 | 479  | 400 | 0.454 |
| 280837 | 17 | 27210235  | 27210235  | C | T   | SNP | FLOT2           | ENST00000394906 | -1 | silent                      | c.402             | p.T134   | tier1 | 19   | 1  | 0.050 | 125  | 112 | 0.473 |
| 280837 | 17 | 73910078  | 73910078  | C | T   | SNP | FBF1            | ENST00000389570 | -1 | silent                      | c.3003            | p.Q1001  | tier1 | 9    | 0  | 0.000 | 150  | 123 | 0.447 |
| 280837 | 18 | 5891961   | 5891961   | G | G   | SNP | TMEM200C        | ENST00000383490 | -1 | missense                    | c.102             | p.R34S   | tier1 | 23   | 0  | 0.000 | 84   | 56  | 0.400 |
| 280837 | 19 | 9001863   | 9001863   | C | A   | SNP | MUC16           | ENST00000380947 | -1 | nonsense                    | c.904             | p.R302*  | tier1 | 87   | 1  | 0.011 | 376  | 334 | 0.468 |
| 280837 | 19 | 18553578  | 18553578  | C | T   | SNP | ELL             | ENST00000262809 | -1 | 3_prime_untranslated_region | c.*1984           | NULL     | tier3 | 583  | 0  | 0.000 | 1133 | 27  | 0.023 |
| 280837 | 19 | 51890473  | 51890473  | C | T   | SNP | LIM2            | ENST00000221973 | -1 | silent                      | c.225             | p.A75    | tier1 | 28   | 0  | 0.000 | 91   | 58  | 0.389 |
| 280837 | 20 | 30409206  | 30409206  | C | T   | SNP | MYLK2           | ENST00000375985 | 1  | intronic                    | c.474-36          | e3-36    | tier3 | 18   | 0  | 0.000 | 80   | 56  | 0.412 |
| 280837 | X  | 129147939 | 129147939 | G | A   | SNP | BCORL1          | ENST00000303743 | 1  | missense                    | c.1191            | p.M397I  | tier1 | 9    | 0  | 0.000 | 30   | 208 | 0.822 |
| 283773 | 1  | 33476435  | 33476435  | C | A   | SNP | AK2             | ENST00000373449 | -1 | splice_site                 | c.695-1           | e7-1     | tier1 | 108  | 0  | 0.000 | 83   | 9   | 0.098 |
| 283773 | 1  | 89236209  | 89236209  | G | T   | SNP | PKN2            | ENST00000370521 | 1  | intronic                    | c.622+57          | e4+57    | tier3 | 53   | 0  | 0.000 | 22   | 6   | 0.214 |
| 283773 | 1  | 201180702 | 201180702 | G | C   | SNP | IGFN1           | ENST00000335211 | 1  | silent                      | c.6681            | p.G2227  | tier1 | 273  | 0  | 0.000 | 120  | 7   | 0.055 |
| 283773 | 1  | 211836204 | 211836204 | G | A   | SNP | NEK2            | ENST00000366999 | -1 | 3_prime_untranslated_region | c.*564            | NULL     | tier3 | 31   | 0  | 0.000 | 27   | 9   | 0.250 |
| 283773 | 2  | 20423047  | 20423048  | - | A   | INS | SDC1            | ENST00000482879 | -1 | rna                         | NULL              | NULL     | tier1 | 133  | 1  | 0.008 | 50   | 7   | 0.123 |
| 283773 | 2  | 84668259  | 84668259  | A | -   | DEL | SUCLG1          | ENST00000393868 | -1 | intronic                    | c.532-31          | e5-31    | tier3 | 56   | 0  | 0.000 | 52   | 10  | 0.161 |
| 283773 | 2  | 182399497 | 182399498 | - | TT  | INS | ITGA4           | ENST00000397033 | 1  | intronic                    | c.2884-46_2884-45 | e27-45   | tier3 | 7    | 0  | 0.000 | 3    | 7   | 0.700 |
| 283773 | 2  | 220082366 | 220082366 | A | -   | DEL | ABCB6           | ENST00000265316 | -1 | intronic                    | c.687+26          | e2+26    | tier4 | 51   | 1  | 0.019 | 33   | 10  | 0.233 |
| 283773 | 5  | 132031958 | 132031958 | T | DEL | DEL | KIF3A           | ENST00000378735 | -1 | 3_prime_untranslated_region | c.*368            | NULL     | tier3 | 48   | 0  | 0.000 | 35   | 9   | 0.205 |
| 283773 | 5  | 139905660 | 139905660 | C | A   | SNP | ANKHD1          | ENST00000297183 | 1  | missense                    | c.4572            | p.F1524L | tier1 | 115  | 0  | 0.000 | 27   | 4   | 0.129 |
| 283773 | 6  | 100404004 | 100404004 | G | T   | SNP | MCHR2           | ENST00000281806 | -1 | missense                    | c.20              | p.S7Y    | tier1 | 108  | 0  | 0.000 | 22   | 4   | 0.154 |
| 283773 | 7  | 86547738  | 86547738  | A | G   | SNP | KIAA1324L       | ENST00000450689 | -1 | intronic                    | c.1593+20         | e12+20   | tier3 | 85   | 0  | 0.000 | 17   | 4   | 0.191 |
| 283773 | 7  | 127013340 | 127013340 | T | -   | DEL | ZNF800          | ENST00000265827 | -1 | intronic                    | c.1994+56         | e4+56    | tier3 | 50   | 0  | 0.000 | 15   | 5   | 0.250 |
| 283773 | 8  | 101522892 | 101522892 | A | -   | DEL | ANKRD46         | ENST00000520552 | -1 | intronic                    | c.637-25          | e4-25    | tier3 | 41   | 0  | 0.000 | 14   | 5   | 0.263 |
| 283773 | 9  | 20923717  | 20923717  | G | A   | SNP | FOCAD           | ENST00000338382 | 1  | missense                    | c.2911            | p.V971I  | tier1 | 99   | 0  | 0.000 | 24   | 6   | 0.200 |
| 283773 | 10 | 33619598  | 33619598  | G | T   | SNP | NRP1            | ENST00000265371 | -1 | intronic                    | c.248+38          | e2+38    | tier2 | 139  | 0  | 0.000 | 33   | 4   | 0.108 |
| 283773 | 10 | 124359634 | 124359634 | A | C   | SNP | DMBT1           | ENST00000338354 | 1  | intronic                    | c.3310+25         | e27+25   | tier3 | 184  | 1  | 0.005 | 140  | 15  | 0.097 |
| 283773 | 11 | 559313    | 559313    | C | -   | DEL | ENSG00000254815 | ENST00000527620 | 1  | rna                         | NULL              | NULL     | tier1 | 66   | 0  | 0.000 | 15   | 4   | 0.211 |
| 283773 | 12 | 124144573 | 124144573 | T | -   | DEL | GTF2H3          | ENST00000543341 | 1  | intronic                    | c.821-20          | e12-20   | tier3 | 83   | 1  | 0.012 | 34   | 8   | 0.191 |
| 283773 | 14 | 72171435  | 72171435  | C | T   | SNP | SIPA1L1         | ENST00000555818 | 1  | splice_region               | c.3647-3          | e12-3    | tier3 | 105  | 0  | 0.000 | 25   | 4   | 0.138 |
| 283773 | 15 | 42503954  | 42503954  | A | -   | DEL | TMEM87A         | ENST00000389834 | -1 | splice_region_del           | c.1627-7          | e20-7    | tier3 | 56   | 0  | 0.000 | 22   | 6   | 0.214 |
| 283773 | 16 | 4796967   | 4796967   | G | A   | SNP | C16orf71        | ENST00000299320 | 1  | silent                      | c.1221            | p.E407   | tier1 | 115  | 0  | 0.000 | 40   | 5   | 0.111 |
| 283773 | 19 | 2121672   | 2121672   | C | T   | SNP | AP3D1           | ENST00000355272 | -1 | intronic                    | c.1101+61         | e12+61   | tier3 | 53   | 0  | 0.000 | 20   | 11  | 0.355 |
| 283773 | 20 | 31023112  | 31023112  | T | G   | SNP | ASXL1           | ENST00000375687 | 1  | nonsense                    | c.2597            | p.L866*  | tier1 | 1114 | 3  | 0.003 | 346  | 99  | 0.222 |
| 283773 | 20 | 31451686  | 31451686  | G | T   | SNP | EFCAB8          | ENST00000400522 | 1  | intronic                    | c.42+46           | e1+46    | tier3 | 69   | 0  | 0.000 | 39   | 6   | 0.133 |
| 283773 | 21 | 33919279  | 33919279  | A | -   | DEL | RNA5SP490       | ENST00000517141 | 1  | 5_prime_flanking_region     | c.-16106          | NULL     | tier3 | 54   | 0  | 0.000 | 34   | 7   | 0.171 |
| 283773 | 22 | 22114660  | 22114661  | - | T   | INS | MAPK1           | ENST00000215832 | -1 | 3_prime_untranslated_region | c.*8833           | NULL     | tier3 | 39   | 0  | 0.000 | 21   | 6   | 0.222 |
| 283773 | 22 | 29939380  | 29939380  | G | T   | SNP | THOC5           | ENST00000397871 | -1 | intronic                    | c.354+38          | e3+38    | tier3 | 48   | 0  | 0.000 | 19   | 5   | 0.208 |
| 283773 | 22 | 50439189  | 50439189  | C | -   | DEL | IL17REL         | ENST00000341280 | -1 | frame_shift_del             | c.213             | p.Q72fs  | tier1 | 32   | 0  | 0.000 | 7    | 4   | 0.364 |
| 283773 | X  | 70339865  | 70339865  | T | A   | SNP | MED12           | ENST00000333646 | 1  | missense                    | c.398             | p.V133D  | tier1 | 755  | 3  | 0.004 | 301  | 15  | 0.048 |
| 283773 | X  | 76709731  | 76709731  | C | T   | SNP | FGF16           | ENST00000439435 | 1  | silent                      | c.84              | p.S28    | tier1 | 145  | 0  | 0.000 | 52   | 5   | 0.088 |
| 283773 | X  | 106788960 | 106788960 | T | C   | SNP | FRMPD3-AS1      | ENST00000415252 | -1 | rna                         | NULL              | NULL     | tier1 | 149  | 0  | 0.000 | 32   | 4   | 0.111 |
| 288033 | 1  | 146491965 | 146491965 | G | C   | SNP | NBPF13P         | ENST00000444680 | -1 | intronic                    | c.NULL            | NULL     | tier3 | 123  | 2  | 0.016 | 240  | 27  | 0.101 |
| 288033 | 1  | 146492064 | 146492064 | C | T   | SNP | NBPF13P         | ENST00000444680 | -1 | intronic                    | c.NULL            | NULL     | tier3 | 75   | 1  | 0.013 | 81   | 14  | 0.143 |
| 288033 | 2  | 33614218  | 33614218  | G | T   | SNP | LTBP1           | ENST00000354476 | 1  | intronic                    | c.4715-33         | e32-33   | tier3 | 91   | 2  | 0.022 | 81   | 91  | 0.529 |
| 288033 | 2  | 122369100 | 122369100 | T | G   | SNP | CLASP1          | ENST00000263710 | -1 | intronic                    | c.1-5344          | e1-5344  | tier4 | 93   | 1  | 0.011 | 135  | 18  | 0.118 |
| 288033 | 2  | 183903211 | 183903211 | G | A   | SNP | NCKAP1          | ENST00000360982 | -1 | 5_prime_untranslated_region | c.-384            | NULL     | tier2 | 8    | 0  | 0.000 | 0    | 7   | 1.000 |
| 288033 | 3  | 126219009 | 126219009 | C | A   | SNP | UROC1           | ENST00000290868 | -1 | intronic                    | c.1146-12         | e12-12   | tier3 | 106  | 3  | 0.028 | 79   | 63  | 0.444 |
| 288033 | 4  | 103611794 | 103611794 | G | A   | SNP | MANBA           | ENST00000226578 | -1 | missense                    | c.808             | p.P270S  | tier1 | 102  | 3  | 0.029 | 78   | 74  | 0.484 |
| 288033 | 7  | 100839218 | 100839218 | C | T   | SNP | MOGAT3          | ENST00000379423 | -1 | missense                    | c.832             | p.A278T  | tier1 | 83   | 0  | 0.000 | 90   | 11  | 0.109 |
| 288033 | 9  | 45120089  | 45120089  | G | T   | SNP | ENSG00000231838 | ENST00000417850 | 1  | 5_prime_flanking_region     | c.-44489          | NULL     | tier3 | 34   | 0  | 0.000 | 31   | 11  | 0.262 |
| 288033 | 9  | 90503384  | 90503384  | G | C   | SNP | SPATA31E1       | ENST00000325643 | 1  | missense                    | c.3982            | p.V1328L | tier1 | 42   | 1  | 0.023 | 19   | 27  | 0.587 |
| 288033 | 9  | 136918842 | 136918842 | T | C   | SNP | BRD3            | ENST00000433041 | -1 | 5_prime_untranslated_region | c.-243            | NULL     | tier3 | 74   | 1  | 0.013 | 65   | 33  | 0.337 |
| 288033 | 11 | 1997318   | 1997318   | T | C   | SNP | MRPL23          | ENST00000397297 | 1  | intronic                    | c.497+3330        | e5+3330  | tier3 | 325  | 7  | 0.021 | 404  | 36  | 0.081 |
| 288033 | 12 | 64474024  | 64474024  | A | -   | DEL | SRGAP1          | ENST00000355086 | 1  | intronic                    | c.1324-42         | e10-42   | tier4 | 89   | 2  | 0.022 | 62   | 13  | 0.173 |
| 288033 | 12 | 85285921  | 85285921  | A | -   | DEL | SLC6A15         | ENST00000266682 | -1 | 5_prime_untranslated_region | c.-22             | NULL     | tier4 | 40   | 0  | 0.000 | 37   | 8   | 0.178 |
| 288033 | 12 | 133201355 | 133201355 | C | T   | SNP | POLE            | ENST00000320574 | -1 | silent                      | c.6789            | p.Q2263  | tier1 | 147  | 0  | 0.000 | 187  | 16  | 0.079 |
| 288033 | 14 | 106330469 | 106330469 | T | C   | SNP | IGHJ4           | ENST00000461719 | -1 | missense                    | c.2               | p.Y1C    | tier1 | 393  | 0  | 0.000 | 412  | 16  | 0.037 |
| 288033 | 15 | 85327071  | 85327071  | C | T   | SNP | ZNF592          | ENST00000299927 | 1  | missense                    | c.1165            | p.R389W  | tier1 | 79   | 0  | 0.000 | 87   | 13  | 0.130 |
| 288033 | 17 | 10350420  | 10350420  | C | T   | SNP | MYH4            | ENST00000255381 | -1 | silent                      | c.5079            | p.R1693  | tier1 | 607  | 16 | 0.026 | 495  | 445 | 0.473 |
| 288033 | 17 | 67178774  | 67178774  | A | C   | SNP | ABCA10          | ENST00000269081 | -1 | intronic                    | c.2631+42         | e19+42   | tier3 | 32   | 0  | 0.000 | 33   | 9   | 0.118 |
| 288033 | 19 | 13941346  | 13941346  | C | G   | SNP | ZSWIM4          | ENST00000254323 | 1  | missense                    | c.2452            | p.P818A  | tier1 | 28   | 0  | 0.000 | 23   | 27  | 0.540 |
| 288033 | 19 | 33793252  | 33793253  | - | G   | INS | CEBPA           | ENST00000498907 | -1 | frame_shift_ins             | c.69_68           | p.H24fs  | tier1 | 811  | 9  | 0.011 | 957  | 184 | 0.161 |
| 288033 | 20 | 43723594  | 43723594  | A | T   | SNP | KCNS1           | ENST00000306117 | -1 | missense                    | c.168             | p.S500T  | tier1 | 46   | 0  | 0.000 | 47   | 44  | 0.484 |
| 288033 | 20 | 57768618  | 57768618  | G | A   | SNP | ZNF831          | ENST00000371030 | 1  | silent                      | c.2544            | p.T848   | tier1 | 39   | 2  | 0.049 | 50   | 46  | 0.479 |
| 288033 | 21 | 42838094  | 42838094  | A | -   | DEL | TMPRSS2         | ENST00000398585 | -1 | intronic                    | c.1579-14         | e14-14   | tier3 | 58   | 0  | 0.000 | 71   | 10  | 0.124 |
| 288033 | 22 | 41742111  | 41742111  | C | T   | SNP | ZC3H7B          | ENST00000351589 | 1  | missense                    | c.1564            | p.R522C  | tier1 | 55   | 2  | 0.035 | 44   | 47  | 0.517 |
| 288033 | 22 | 50960184  | 50960184  | G | A   | SNP | NCAPH2          | ENST00000299821 | 1  | missense                    | c.1015            | p.V339M  | tier1 | 76   | 3  | 0.038 | 66   | 82  | 0.554 |
| 288033 | X  | 107512391 | 107512391 | A | -   | DEL | COL4A6          | ENST00000461897 | -1 | splice_region_del           | c.NULL            | NULL     | tier3 | 107  | 0  | 0.000 | 106  | 11  | 0.0   |

|        |    |           |           |     |      |     |                 |                 |    |                             |                   |          |       |      |   |       |      |     |       |
|--------|----|-----------|-----------|-----|------|-----|-----------------|-----------------|----|-----------------------------|-------------------|----------|-------|------|---|-------|------|-----|-------|
| 293230 | 5  | 5462936   | 5462936   | T   | C    | SNP | KIAA0947        | ENST00000296564 | 1  | silent                      | c.3489            | p.T1163  | tier1 | 108  | 1 | 0.009 | 156  | 21  | 0.119 |
| 293230 | 5  | 67522723  | 67522723  | G   | T    | SNP | PIK3R1          | ENST00000396611 | 1  | missense                    | c.220             | p.V74L   | tier1 | 182  | 0 | 0.000 | 242  | 14  | 0.055 |
| 293230 | 6  | 125146129 | 125146129 | G   | T    | SNP | NKAIN2          | ENST00000368417 | 1  | 3_prime_untranslated_region | c.*1754           | NULL     | tier3 | 44   | 1 | 0.022 | 118  | 31  | 0.208 |
| 293230 | 6  | 159653093 | 159653093 | G   | C    | SNP | FNDC1           | ENST00000297267 | 1  | missense                    | c.1549            | p.G517R  | tier1 | 87   | 2 | 0.023 | 87   | 18  | 0.171 |
| 293230 | 9  | 138641963 | 138641963 | G   | A    | SNP | KCNT1           | ENST00000298480 | 1  | missense                    | c.274             | p.V92I   | tier1 | 651  | 5 | 0.008 | 771  | 60  | 0.072 |
| 293230 | 12 | 56844914  | 56844914  | G   | A    | SNP | MIP             | ENST00000257979 | -1 | 3_prime_untranslated_region | c.*150            | NULL     | tier3 | 43   | 0 | 0.000 | 42   | 9   | 0.173 |
| 293230 | 12 | 133159733 | 133159733 | C   | T    | SNP | FBRSL1          | ENST00000434748 | 1  | missense                    | c.2507            | p.A836V  | tier1 | 8    | 0 | 0.000 | 3    | 7   | 0.700 |
| 293230 | 15 | 34130377  | 34130377  | C   | T    | SNP | RYR3            | ENST00000389232 | 1  | nonsense                    | c.12196           | p.R4066* | tier1 | 1002 | 0 | 0.000 | 1296 | 74  | 0.054 |
| 293230 | 15 | 91044236  | 91044236  | G   | A    | SNP | IQGAP1          | ENST00000268182 | 1  | 3_prime_untranslated_region | c.*896            | NULL     | tier3 | 223  | 0 | 0.000 | 365  | 21  | 0.054 |
| 293230 | 16 | 1116377   | 1116377   | C   | T    | SNP | ENSG00000261720 | ENST00000564390 | 1  | rna                         | NULL              | NULL     | tier1 | 82   | 2 | 0.024 | 55   | 14  | 0.194 |
| 293230 | 16 | 12297010  | 12297010  | T   | G    | SNP | SNX29           | ENST00000306030 | 1  | intronic                    | c.523+3470        | e6+3470  | tier3 | 356  | 8 | 0.022 | 513  | 47  | 0.084 |
| 293230 | 16 | 67962332  | 67962332  | G   | C    | SNP | PSKH1           | ENST00000291041 | 1  | 3_prime_untranslated_region | c.*787            | NULL     | tier2 | 88   | 0 | 0.000 | 85   | 22  | 0.202 |
| 293230 | 19 | 7995988   | 7995988   | A   | -    | DEL | TIMM44          | ENST00000270538 | -1 | intronic                    | c.1038+35         | e10+35   | tier3 | 22   | 0 | 0.000 | 30   | 13  | 0.302 |
| 293230 | X  | 72224144  | 72224145  | -   | C    | INS | PABPC1L2B       | ENST00000373521 | 1  | 3_prime_untranslated_region | c.*60             | NULL     | tier2 | 14   | 0 | 0.000 | 4    | 5   | 0.556 |
| 298273 | 1  | 46159297  | 46159297  | C   | T    | SNP | TMEM69          | ENST00000372025 | 1  | missense                    | c.464             | p.A155V  | tier1 | 49   | 1 | 0.020 | 125  | 100 | 0.443 |
| 298273 | 1  | 151262327 | 151262328 | -   | C    | INS | ZNF687          | ENST00000324048 | 1  | frame_shift_ins             | c.2808_2809       | p.R938fs | tier1 | 382  | 1 | 0.003 | 514  | 321 | 0.384 |
| 298273 | 1  | 183498545 | 183498545 | G   | T    | SNP | SMG7            | ENST00000507469 | 1  | silent                      | c.720             | p.V240   | tier1 | 65   | 0 | 0.000 | 97   | 63  | 0.394 |
| 298273 | 2  | 101099723 | 101099723 | G   | A    | SNP | NMS             | ENST00000376865 | 1  | nonsense                    | c.459             | p.W153*  | tier1 | 39   | 0 | 0.000 | 73   | 53  | 0.421 |
| 298273 | 3  | 14106117  | 14106117  | T   | C    | SNP | TPRXL           | ENST00000326972 | 1  | silent                      | c.441             | p.S147   | tier1 | 48   | 0 | 0.000 | 94   | 19  | 0.168 |
| 298273 | 3  | 46759141  | 46759141  | C   | T    | SNP | PRSS50          | ENST00000315170 | -1 | intronic                    | c.107-14          | e2-14    | tier2 | 79   | 0 | 0.000 | 82   | 58  | 0.414 |
| 298273 | 3  | 50339933  | 50339933  | C   | T    | SNP | HYAL1           | ENST00000266031 | -1 | missense                    | c.455             | p.R152Q  | tier1 | 46   | 0 | 0.000 | 49   | 22  | 0.306 |
| 298273 | 3  | 58792080  | 58792081  | -   | T    | INS | C3orf67         | ENST00000482387 | -1 | intronic                    | c.1862+40_1862+39 | e11+40   | tier3 | 15   | 0 | 0.000 | 70   | 39  | 0.358 |
| 298273 | 3  | 158407931 | 158407931 | T   | -    | DEL | GFM1            | ENST00000486715 | 1  | intronic                    | c.1910-21         | e16-21   | tier3 | 25   | 0 | 0.000 | 50   | 15  | 0.231 |
| 298273 | 5  | 31405700  | 31405701  | -   | A    | INS | DROSHA          | ENST00000344624 | -1 | intronic                    | c.3994+83_3994+82 | e32+83   | tier3 | 21   | 0 | 0.000 | 61   | 21  | 0.256 |
| 298273 | 5  | 140596188 | 140596188 | G   | A    | SNP | PCDHB13         | ENST00000341948 | 1  | 3_prime_untranslated_region | c.*96             | NULL     | tier3 | 24   | 0 | 0.000 | 54   | 35  | 0.393 |
| 298273 | 5  | 170837543 | 170837544 | -   | TCTG | INS | NPM1            | ENST00000296930 | 1  | frame_shift_ins             | c.859_860         | p.W288fs | tier1 | 108  | 2 | 0.018 | 283  | 133 | 0.320 |
| 298273 | 5  | 179150788 | 179150789 | -   | T    | INS | CANX            | ENST00000415618 | 1  | splice_region_ins           | c.1623+8_1623+7   | e12+8    | tier3 | 35   | 0 | 0.000 | 83   | 18  | 0.178 |
| 298273 | 6  | 10397893  | 10397894  | -   | A    | INS | TFAP2A          | ENST00000379604 | -1 | 3_prime_untranslated_region | c.*757            | NULL     | tier3 | 16   | 0 | 0.000 | 26   | 16  | 0.381 |
| 298273 | 6  | 152461140 | 152461140 | C   | T    | SNP | SYNE1           | ENST00000265368 | -1 | missense                    | c.25403           | p.R8468H | tier1 | 68   | 0 | 0.000 | 52   | 50  | 0.490 |
| 298273 | 7  | 64275471  | 64275471  | T   | -    | DEL | ZNF138          | ENST00000359735 | 1  | intronic                    | c.1+49            | e0+49    | tier3 | 31   | 0 | 0.000 | 72   | 21  | 0.226 |
| 298273 | 7  | 131071805 | 131071805 | T   | G    | SNP | MKLN1           | ENST00000352689 | 1  | intronic                    | c.169-74          | e3-74    | tier3 | 9    | 0 | 0.000 | 27   | 31  | 0.535 |
| 298273 | 10 | 94773927  | 94773928  | -   | T    | INS | EXOC6           | ENST00000371547 | 1  | intronic                    | c.2144-24_2144-23 | e21-23   | tier3 | 12   | 0 | 0.000 | 35   | 29  | 0.453 |
| 298273 | 10 | 112340661 | 112340661 | G   | A    | SNP | SMC3            | ENST00000361804 | 1  | splice_site                 | c.430-1           | e8-1     | tier1 | 196  | 0 | 0.000 | 654  | 30  | 0.044 |
| 298273 | 11 | 1092457   | 1092457   | A   | C    | SNP | MUC2            | ENST00000441003 | 1  | missense                    | c.4276            | p.T1426P | tier1 | 188  | 3 | 0.016 | 425  | 38  | 0.082 |
| 298273 | 11 | 134605529 | 134605529 | A   | G    | SNP | ENSG00000251226 | ENST00000513405 | 1  | rna                         | NULL              | NULL     | tier1 | 120  | 1 | 0.008 | 222  | 35  | 0.136 |
| 298273 | 13 | 49073878  | 49073878  | C   | T    | SNP | RCBTB2          | ENST00000430805 | -1 | silent                      | c.1278            | p.S426   | tier1 | 41   | 0 | 0.000 | 50   | 45  | 0.474 |
| 298273 | 14 | 21841578  | 21841578  | A   | G    | SNP | SUPT16H         | ENST00000216297 | -1 | silent                      | c.78              | p.D26    | tier1 | 24   | 0 | 0.000 | 75   | 44  | 0.367 |
| 298273 | 17 | 1563288   | 1563288   | T   | C    | SNP | PRPF8           | ENST00000304992 | -1 | missense                    | c.4793            | p.D1598G | tier1 | 266  | 2 | 0.007 | 432  | 319 | 0.423 |
| 298273 | 17 | 35503592  | 35503592  | A   | G    | SNP | ACACA           | ENST00000353139 | -1 | intronic                    | c.5679+3196       | e45+3196 | tier3 | 36   | 2 | 0.053 | 32   | 21  | 0.396 |
| 298273 | 17 | 66873661  | 66873661  | G   | A    | SNP | ABCA8           | ENST00000430352 | -1 | missense                    | c.4198            | p.R1400W | tier1 | 91   | 0 | 0.000 | 93   | 70  | 0.429 |
| 298273 | 19 | 8436034   | 8436034   | C   | T    | SNP | ANGPTL4         | ENST00000301455 | 1  | silent                      | c.756             | p.H252   | tier1 | 91   | 1 | 0.011 | 154  | 109 | 0.414 |
| 298273 | 19 | 36015866  | 36015866  | C   | A    | SNP | SBSN            | ENST00000518157 | -1 | intronic                    | c.610-40          | e3-40    | tier3 | 66   | 0 | 0.000 | 74   | 68  | 0.479 |
| 298273 | 20 | 1106550   | 1106550   | G   | A    | SNP | PSMF1           | ENST00000333082 | 1  | intronic                    | c.282+257         | e2+257   | tier3 | 34   | 0 | 0.000 | 66   | 68  | 0.508 |
| 298273 | 21 | 10934043  | 10934043  | G   | A    | SNP | TPTE            | ENST00000361285 | -1 | silent                      | c.934             | p.L312   | tier1 | 244  | 0 | 0.000 | 810  | 126 | 0.135 |
| 298273 | 21 | 43533838  | 43533838  | G   | A    | SNP | UMODL1          | ENST00000408989 | -1 | missense                    | c.2644            | p.V882M  | tier1 | 33   | 0 | 0.000 | 47   | 48  | 0.505 |
| 298273 | 22 | 20710809  | 20710809  | C   | G    | SNP | FAM230A         | ENST00000434783 | 1  | silent                      | c.2541            | p.T847   | tier1 | 156  | 1 | 0.006 | 394  | 31  | 0.073 |
| 298273 | X  | 22196368  | 22196370  | TGT | -    | DEL | PHEX            | ENST00000379374 | 1  | intronic                    | c.1483-22_1483-20 | e14-20   | tier2 | 24   | 0 | 0.000 | 18   | 49  | 0.731 |
| 298273 | X  | 135761723 | 135761724 | -   | A    | INS | ARHGEF6         | ENST00000250617 | -1 | frame_shift_ins             | c.1801_1800       | p.R600fs | tier1 | 34   | 0 | 0.000 | 28   | 83  | 0.748 |
| 307995 | 1  | 34052117  | 34052117  | G   | A    | SNP | CSMD2           | ENST00000373381 | -1 | silent                      | c.7038            | p.P2346  | tier1 | 82   | 0 | 0.000 | 212  | 48  | 0.185 |
| 307995 | 1  | 121137613 | 121137613 | T   | A    | SNP | SRGAP2-AS1      | ENST00000437515 | -1 | intronic                    | c.NULL            | NULL     | tier3 | 47   | 1 | 0.019 | 67   | 17  | 0.185 |
| 307995 | 1  | 159174836 | 159174836 | C   | T    | SNP | DARC            | ENST00000368122 | 1  | intronic                    | c.211+66          | e1+66    | tier2 | 35   | 0 | 0.000 | 95   | 20  | 0.172 |
| 307995 | 1  | 207218940 | 207218940 | G   | T    | SNP | YOD1            | ENST00000315927 | -1 | 3_prime_untranslated_region | c.*3425           | NULL     | tier3 | 66   | 0 | 0.000 | 123  | 18  | 0.126 |
| 307995 | 2  | 27325149  | 27325149  | C   | G    | SNP | CGREF1          | ENST00000467539 | -1 | 5_prime_untranslated_region | c.-27325149       | NULL     | tier2 | 30   | 0 | 0.000 | 82   | 25  | 0.234 |
| 307995 | 2  | 43986084  | 43986084  | A   | G    | SNP | PLEKHH2         | ENST00000490038 | 1  | missense                    | c.253             | p.T85A   | tier1 | 41   | 0 | 0.000 | 135  | 23  | 0.144 |
| 307995 | 2  | 61510631  | 61510631  | T   | C    | SNP | USP34           | ENST00000398571 | -1 | intronic                    | c.4833-47         | e36-47   | tier3 | 103  | 0 | 0.000 | 179  | 43  | 0.193 |
| 307995 | 2  | 138738953 | 138738953 | C   | T    | SNP | HNMT            | ENST00000329366 | 1  | silent                      | c.358             | p.L120   | tier1 | 84   | 0 | 0.000 | 171  | 37  | 0.178 |
| 307995 | 2  | 207310122 | 207310122 | T   | C    | SNP | ADAM23          | ENST00000264377 | 1  | silent                      | c.306             | p.S102   | tier1 | 45   | 0 | 0.000 | 97   | 31  | 0.242 |
| 307995 | 3  | 9517257   | 9517257   | G   | T    | SNP | SETD5           | ENST00000402198 | 1  | nonsense                    | c.3811            | p.G1271* | tier1 | 32   | 0 | 0.000 | 84   | 27  | 0.243 |
| 307995 | 3  | 30702951  | 30702951  | G   | A    | SNP | TGFB2           | ENST00000359013 | 1  | intronic                    | c.530-10179       | e5-10179 | tier4 | 65   | 0 | 0.000 | 98   | 17  | 0.148 |
| 307995 | 3  | 126180517 | 126180517 | G   | A    | SNP | ZXDC            | ENST00000389709 | -1 | missense                    | c.1988            | p.P663L  | tier1 | 27   | 0 | 0.000 | 58   | 24  | 0.293 |
| 307995 | 4  | 107154095 | 107154095 | C   | A    | SNP | TBCK            | ENST00000273980 | -1 | missense                    | c.1639            | p.G547C  | tier1 | 59   | 1 | 0.017 | 67   | 15  | 0.183 |
| 307995 | 5  | 5235176   | 5235176   | C   | T    | SNP | ADAMTS16        | ENST00000274181 | 1  | missense                    | c.1900            | p.L634F  | tier1 | 69   | 0 | 0.000 | 250  | 47  | 0.158 |
| 307995 | 5  | 14364017  | 14364017  | C   | A    | SNP | TRIO            | ENST00000344204 | 1  | silent                      | c.2568            | p.V856   | tier1 | 69   | 0 | 0.000 | 118  | 34  | 0.222 |
| 307995 | 5  | 140174742 | 140174742 | C   | T    | SNP | PCDHA2          | ENST00000526136 | 1  | missense                    | c.193             | p.R65W   | tier1 | 338  | 0 | 0.000 | 906  | 127 | 0.123 |
| 307995 | 6  | 32713784  | 32713784  | C   | A    | SNP | HLA-DQA2        | ENST00000374940 | 1  | missense                    | c.548             | p.A183D  | tier1 | 137  | 5 | 0.035 | 371  | 81  | 0.178 |
| 307995 | 6  | 38743672  | 38743672  | G   | A    | SNP | DNAH8           | ENST00000359357 | 1  | missense                    | c.1256            | p.R419K  | tier1 | 48   | 0 | 0.000 | 155  | 27  | 0.148 |
| 307995 | 7  | 29689532  | 29689532  | T   | A    | SNP | ZNRF2P2         | ENST00000442865 | -1 | intronic                    | c.NULL            | NULL     | tier2 | 69   | 0 | 0.000 | 187  | 49  | 0.206 |
| 307995 | 7  | 98639905  | 98639905  | T   | -    | DEL | SMURF1          | ENST00000361125 | -1 | intronic                    | c.1335-50         | e13-50   | tier4 | 29   | 0 | 0.000 | 53   | 16  | 0.232 |
| 307995 | 9  | 38414100  | 38414100  | C   | T    | SNP | IGFBPL1         | ENST00000377694 | -1 |                             |                   |          |       |      |   |       |      |     |       |



|        |    |           |           |           |    |     |              |                 |    |                             |                 |                      |       |      |    |       |      |     |       |
|--------|----|-----------|-----------|-----------|----|-----|--------------|-----------------|----|-----------------------------|-----------------|----------------------|-------|------|----|-------|------|-----|-------|
| 307995 | 12 | 9095076   | 9095076   | C         | G  | SNP | M6PR         | ENST00000000412 | -1 | missense                    | c.647           | p.G216A              | tier1 | 57   | 0  | 0.000 | 129  | 20  | 0.133 |
| 307995 | 12 | 50027356  | 50027356  | G         | A  | SNP | PRPF40B      | ENST00000548825 | 1  | intronic                    | c.580+26        | e8+26                | tier3 | 496  | 0  | 0.000 | 1312 | 317 | 0.194 |
| 307995 | 12 | 52715016  | 52715016  | G         | T  | SNP | KRT83        | ENST00000293670 | -1 | missense                    | c.104           | p.A35D               | tier1 | 102  | 0  | 0.000 | 219  | 73  | 0.249 |
| 307995 | 12 | 52891238  | 52891238  | T         | A  | SNP | KRT6C        | ENST00000252250 | -1 | 5_prime_flanking_region     | c.-23717        | NULL                 | tier3 | 185  | 0  | 0.000 | 390  | 106 | 0.213 |
| 307995 | 12 | 109519720 | 109519720 | C         | T  | SNP | USP30        | ENST00000257548 | 1  | intronic                    | c.781-18        | e9-18                | tier3 | 44   | 0  | 0.000 | 120  | 22  | 0.155 |
| 307995 | 14 | 19378051  | 19378051  | G         | C  | SNP | OR11H12      | ENST00000550708 | 1  | missense                    | c.458           | p.G153A              | tier1 | 1326 | 0  | 0.000 | 3626 | 167 | 0.044 |
| 307995 | 14 | 94945375  | 94945375  | G         | A  | SNP | SERPINA9     | ENST00000539349 | -1 | intronic                    | c.NULL          | NULL                 | tier3 | 133  | 0  | 0.000 | 261  | 54  | 0.170 |
| 307995 | 15 | 45725117  | 45725118  | -         | T  | INS | C15orf48     | ENST00000344300 | 1  | intronic                    | c.184-29_184-28 | e4-28                | tier3 | 73   | 1  | 0.014 | 114  | 20  | 0.149 |
| 307995 | 16 | 49315688  | 49315688  | G         | T  | SNP | CBLN1        | ENST00000219197 | -1 | 5_prime_untranslated_region | c.-312          | NULL                 | tier4 | 13   | 0  | 0.000 | 34   | 23  | 0.404 |
| 307995 | 17 | 61986092  | 61986092  | G         | C  | SNP | GH2          | ENST00000332800 | -1 | 5_prime_flanking_region     | c.-26931        | NULL                 | tier3 | 135  | 0  | 0.000 | 233  | 57  | 0.196 |
| 307995 | 18 | 50683690  | 50683690  | C         | T  | SNP | DCC          | ENST00000442544 | 1  | intronic                    | c.1262-36       | e8-36                | tier3 | 94   | 0  | 0.000 | 153  | 39  | 0.203 |
| 307995 | 20 | 47247205  | 47247205  | C         | T  | SNP | PREX1        | ENST00000371941 | -1 | intronic                    | c.4593+61       | e36+61               | tier3 | 42   | 0  | 0.000 | 147  | 28  | 0.160 |
| 307995 | 20 | 56082765  | 56082765  | C         | T  | SNP | CTCF1        | ENST00000432255 | -1 | silent                      | c.1326          | p.P442               | tier1 | 54   | 0  | 0.000 | 105  | 31  | 0.226 |
| 307995 | 20 | 58349240  | 58349240  | G         | A  | SNP | PHACTR3      | ENST00000371015 | 1  | intronic                    | c.927-58        | e7-58                | tier3 | 83   | 0  | 0.000 | 159  | 37  | 0.189 |
| 307995 | 21 | 36252994  | 36252995  | -         | CC | INS | RUNX1        | ENST00000300305 | -1 | frame_shift_ins             | c.368_367       | p.D123fs             | tier1 | 833  | 0  | 0.000 | 1991 | 374 | 0.158 |
| 307995 | 22 | 20171118  | 20171118  | C         | T  | SNP | LINC00896    | ENST00000423736 | 1  | 5_prime_flanking_region     | c.-22982        | NULL                 | tier3 | 27   | 0  | 0.000 | 104  | 38  | 0.268 |
| 307995 | X  | 39911641  | 39911641  | C         | T  | SNP | BCOR         | ENST00000378444 | -1 | nonsense                    | c.4989          | p.W1663*             | tier1 | 189  | 0  | 0.000 | 371  | 135 | 0.266 |
| 307995 | X  | 53574723  | 53574723  | G         | T  | SNP | HUWE1        | ENST00000262854 | -1 | missense                    | c.10547         | p.A3516D             | tier1 | 41   | 0  | 0.000 | 87   | 36  | 0.293 |
| 307995 | X  | 151336800 | 151336800 | C         | T  | SNP | GABRA3       | ENST00000370314 | -1 | missense                    | c.1379          | p.R460H              | tier1 | 75   | 0  | 0.000 | 158  | 62  | 0.282 |
| 311426 | 1  | 15987264  | 15987264  | T         | C  | SNP | RSC1A1       | ENST00000345034 | 1  | silent                      | c.901           | p.L301               | tier1 | 31   | 0  | 0.000 | 54   | 41  | 0.432 |
| 311426 | 1  | 23660085  | 23660085  | T         | C  | SNP | HNRNPR       | ENST00000374616 | -1 | missense                    | c.424           | p.T142A              | tier1 | 74   | 2  | 0.026 | 105  | 69  | 0.397 |
| 311426 | 1  | 26795865  | 26795865  | A         | G  | SNP | DHDDS        | ENST00000360009 | 1  | 3_prime_untranslated_region | c.*243          | NULL                 | tier3 | 77   | 3  | 0.038 | 69   | 67  | 0.489 |
| 311426 | 1  | 47904000  | 47904000  | G         | A  | SNP | FOXD2        | ENST00000334793 | 1  | missense                    | c.193           | p.A65T               | tier1 | 6    | 0  | 0.000 | 3    | 9   | 0.750 |
| 311426 | 1  | 211433418 | 211433418 | T         | A  | SNP | RCOR3        | ENST00000367005 | 1  | 5_prime_untranslated_region | c.-40           | NULL                 | tier4 | 65   | 1  | 0.015 | 58   | 38  | 0.392 |
| 311426 | 3  | 158380318 | 158380318 | C         | T  | SNP | GFM1         | ENST00000486715 | 1  | intronic                    | c.1324-99       | e11-99               | tier3 | 28   | 1  | 0.035 | 34   | 21  | 0.382 |
| 311426 | 5  | 228288    | 228288    | C         | T  | SNP | SDHA         | ENST00000514027 | 1  | 3_prime_untranslated_region | c.*228288       | NULL                 | tier3 | 161  | 0  | 0.000 | 154  | 10  | 0.061 |
| 311426 | 5  | 68849514  | 68849514  | T         | G  | SNP | OCLN         | ENST00000514370 | 1  | rna                         | NULL            | NULL                 | tier1 | 72   | 3  | 0.040 | 104  | 88  | 0.458 |
| 311426 | 5  | 108691731 | 108691731 | A         | -  | DEL | PJA2         | ENST00000361189 | -1 | splice_region_del           | c.1653-4        | e6-4                 | tier3 | 35   | 0  | 0.000 | 57   | 17  | 0.230 |
| 311426 | 5  | 118824832 | 118824832 | G         | A  | SNP | HSD17B4      | ENST00000256216 | 1  | intronic                    | c.623-55        | e9-55                | tier3 | 55   | 2  | 0.035 | 52   | 33  | 0.388 |
| 311426 | 5  | 156659265 | 156659265 | A         | G  | SNP | ITK          | ENST00000422843 | 1  | intronic                    | c.714-85        | e8-85                | tier3 | 51   | 2  | 0.038 | 59   | 42  | 0.416 |
| 311426 | 6  | 43481400  | 43481400  | A         | G  | SNP | YIPF3        | ENST00000372417 | -1 | 5_prime_untranslated_region | c.-43481400     | NULL                 | tier3 | 20   | 0  | 0.000 | 30   | 17  | 0.362 |
| 311426 | 6  | 75798722  | 75798722  | C         | -  | DEL | COL12A1      | ENST00000322507 | -1 | intronic                    | c.9010+100      | e63+100              | tier4 | 132  | 2  | 0.015 | 118  | 14  | 0.106 |
| 311426 | 6  | 96651060  | 96651060  | G         | A  | SNP | FUT9         | ENST00000302103 | 1  | missense                    | c.29            | p.R10H               | tier1 | 66   | 0  | 0.000 | 89   | 54  | 0.375 |
| 311426 | 7  | 100643736 | 100643736 | T         | C  | SNP | MUC12        | ENST00000536621 | 1  | missense                    | c.9892          | p.S3298P             | tier1 | 462  | 5  | 0.011 | 756  | 61  | 0.075 |
| 311426 | 7  | 120390342 | 120390342 | C         | A  | SNP | KCND2        | ENST00000331113 | 1  | 3_prime_untranslated_region | c.*2430         | NULL                 | tier2 | 30   | 0  | 0.000 | 30   | 20  | 0.400 |
| 311426 | 7  | 141791778 | 141791778 | G         | A  | SNP | MGAM         | ENST00000475668 | 1  | silent                      | c.6876          | p.R2292              | tier1 | 142  | 5  | 0.034 | 102  | 73  | 0.417 |
| 311426 | 7  | 151945554 | 151945554 | G         | A  | SNP | KMT2C        | ENST00000355193 | -1 | silent                      | c.1965          | p.V655               | tier1 | 318  | 17 | 0.051 | 467  | 332 | 0.416 |
| 311426 | 8  | 2857551   | 2857551   | C         | T  | SNP | CSMD1        | ENST00000520002 | -1 | missense                    | c.8135          | p.R2712Q             | tier1 | 703  | 23 | 0.032 | 607  | 490 | 0.446 |
| 311426 | 9  | 35301169  | 35301169  | T         | C  | SNP | UNC13B       | ENST00000378496 | 1  | intronic                    | c.761+5242      | e8+5242              | tier3 | 57   | 2  | 0.034 | 95   | 56  | 0.371 |
| 311426 | 9  | 113086243 | 113086243 | A         | G  | SNP | TXNDC8       | ENST00000374507 | -1 | silent                      | c.234           | p.H78                | tier1 | 109  | 5  | 0.044 | 95   | 61  | 0.389 |
| 311426 | 10 | 123727090 | 123727090 | A         | T  | SNP | NSMCE4A      | ENST00000481320 | -1 | 5_prime_untranslated_region | c.-123727090    | NULL                 | tier3 | 57   | 0  | 0.000 | 81   | 62  | 0.434 |
| 311426 | 11 | 247379    | 247379    | G         | A  | SNP | PSMD13       | ENST00000431206 | 1  | missense                    | c.505           | p.G169R              | tier1 | 145  | 5  | 0.033 | 152  | 90  | 0.372 |
| 311426 | 11 | 10831943  | 10831944  | -         | A  | INS | LOC101928053 | ENST00000499765 | 1  | intronic                    | c.NULL          | NULL                 | tier3 | 31   | 0  | 0.000 | 39   | 23  | 0.371 |
| 311426 | 11 | 75378554  | 75378554  | C         | T  | SNP | MAP6         | ENST00000304771 | -1 | silent                      | c.861           | p.R287               | tier1 | 16   | 0  | 0.000 | 2    | 3   | 0.600 |
| 311426 | 11 | 125616169 | 125616169 | G         | A  | SNP | PATE1        | ENST00000305738 | 1  | 5_prime_flanking_region     | c.-31           | NULL                 | tier3 | 77   | 5  | 0.061 | 71   | 50  | 0.413 |
| 311426 | 12 | 13714497  | 13714497  | C         | A  | SNP | GRIN2B       | ENST00000609686 | -1 | 3_prime_untranslated_region | c.*1220         | NULL                 | tier3 | 162  | 5  | 0.030 | 127  | 126 | 0.496 |
| 311426 | 12 | 78334060  | 78334060  | C         | T  | SNP | NAV3         | ENST00000549369 | 1  | rna                         | NULL            | NULL                 | tier1 | 61   | 2  | 0.032 | 44   | 39  | 0.470 |
| 311426 | 12 | 106853134 | 106853134 | A         | T  | SNP | POLR3B       | ENST00000228347 | 1  | missense                    | c.2558          | p.D853V              | tier1 | 71   | 2  | 0.027 | 89   | 65  | 0.422 |
| 311426 | 13 | 26114392  | 26114392  | T         | C  | SNP | ATP8A2       | ENST00000381655 | 1  | intronic                    | c.582-65        | e8-65                | tier3 | 77   | 0  | 0.000 | 67   | 51  | 0.432 |
| 311426 | 14 | 99988655  | 99988655  | G         | A  | SNP | CCDC85C      | ENST00000380243 | -1 | intronic                    | c.868-78        | e3-78                | tier3 | 68   | 2  | 0.029 | 57   | 47  | 0.452 |
| 311426 | 15 | 48065413  | 48065413  | C         | T  | SNP | SEMA6D       | ENST00000316364 | 1  | 3_prime_untranslated_region | c.*1431         | NULL                 | tier3 | 48   | 0  | 0.000 | 63   | 42  | 0.400 |
| 311426 | 15 | 72037471  | 72037471  | G         | A  | SNP | THSD4        | ENST00000261862 | 1  | missense                    | c.1933          | p.V645M              | tier1 | 67   | 4  | 0.056 | 40   | 36  | 0.474 |
| 311426 | 16 | 90162620  | 90162620  | T         | G  | SNP | TUBB8P7      | ENST00000564451 | 1  | rna                         | NULL            | NULL                 | tier1 | 190  | 0  | 0.000 | 263  | 15  | 0.054 |
| 311426 | 19 | 16145115  | 16145115  | C         | A  | SNP | LINC00905    | ENST00000397365 | 1  | intronic                    | c.NULL          | NULL                 | tier3 | 44   | 1  | 0.022 | 40   | 34  | 0.453 |
| 311426 | 19 | 19767521  | 19767521  | C         | T  | SNP | ATP13A1      | ENST00000357324 | -1 | missense                    | c.1031          | p.R344H              | tier1 | 34   | 1  | 0.029 | 50   | 32  | 0.390 |
| 311426 | 21 | 44524456  | 44524456  | G         | A  | SNP | U2AF1        | ENST00000291552 | -1 | missense                    | c.101           | p.S34F               | tier1 | 373  | 17 | 0.044 | 387  | 388 | 0.499 |
| 311426 | X  | 138698653 | 138698653 | A         | -  | DEL | MCF2         | ENST00000370578 | -1 | intronic                    | c.1435-21       | e12-21               | tier3 | 79   | 1  | 0.013 | 113  | 17  | 0.131 |
| 329866 | 1  | 55129373  | 55129373  | A         | C  | SNP | MROH7-TTC4   | ENST00000414150 | 1  | intronic                    | c.1232-1467     | e2-1467              | tier4 | 17   | 0  | 0.000 | 37   | 21  | 0.362 |
| 329866 | 1  | 89615249  | 89615249  | C         | T  | SNP | GBP7         | ENST00000294671 | -1 | missense                    | c.878           | p.G293E              | tier1 | 256  | 0  | 0.000 | 708  | 287 | 0.288 |
| 329866 | 1  | 244715862 | 244715862 | A         | G  | SNP | C1orf101     | ENST00000366531 | 1  | missense                    | c.322           | p.T108A              | tier1 | 24   | 0  | 0.000 | 58   | 35  | 0.376 |
| 329866 | 2  | 238436052 | 238436052 | C         | T  | SNP | MLPH         | ENST00000264605 | 1  | silent                      | c.913           | p.L305               | tier1 | 51   | 0  | 0.000 | 113  | 67  | 0.370 |
| 329866 | 3  | 56037242  | 56037242  | A         | -  | DEL | ERC2         | ENST00000288221 | -1 | intronic                    | c.2061+3967     | e9+3967              | tier3 | 24   | 0  | 0.000 | 73   | 38  | 0.342 |
| 329866 | 3  | 75467466  | 75467466  | G         | A  | SNP | ALG1L6P      | ENST00000515248 | 1  | intronic                    | c.NULL          | NULL                 | tier3 | 84   | 0  | 0.000 | 275  | 25  | 0.083 |
| 329866 | 3  | 112190167 | 112190167 | C         | T  | SNP | BTLA         | ENST00000334529 | -1 | missense                    | c.439           | p.E147K              | tier1 | 65   | 2  | 0.030 | 172  | 107 | 0.382 |
| 329866 | 3  | 127381208 | 127381208 | G         | A  | SNP | PODXL2       | ENST00000342480 | 1  | intronic                    | c.1206+54       | e4+54                | tier3 | 21   | 0  | 0.000 | 57   | 32  | 0.356 |
| 329866 | 3  | 132363753 | 132363753 | A         | -  | DEL | ACAD11       | ENST00000264990 | -1 | intronic                    | c.150-13        | e2-13                | tier3 | 42   | 0  | 0.000 | 107  | 27  | 0.202 |
| 329866 | 3  | 164700861 | 164700861 | G         | A  | SNP | SI           | ENST00000264382 | -1 | intronic                    | c.5198-22       | e45-22               | tier3 | 197  | 0  | 0.000 | 347  | 154 | 0.307 |
| 329866 | 4  | 88536147  | 88536155  | ACAGCAGCA | A  | DEL | DSPP         | ENST00000282478 | 1  | in_frame_del                | c.2333_2341     | p.NSS781in_frame_del | tier1 | 107  | 0  | 0.000 | 309  | 28  | 0.083 |
| 329866 | 4  | 104007719 | 104007719 | A         | -  | DEL | BDH2         | ENST00000296424 | -1 | intronic                    | c.3             |                      |       |      |    |       |      |     |       |

|        |    |           |           |     |      |     |                 |                 |    |                             |                   |                    |       |     |   |       |      |      |       |
|--------|----|-----------|-----------|-----|------|-----|-----------------|-----------------|----|-----------------------------|-------------------|--------------------|-------|-----|---|-------|------|------|-------|
| 329866 | 8  | 140768860 | 140768860 | A   | G    | SNP | TRAPPC9         | ENST00000389328 | -1 | intronic                    | c.3350-24415      | e22-24415          | tier3 | 67  | 0 | 0.000 | 317  | 32   | 0.091 |
| 329866 | 9  | 35076941  | 35076941  | C   | T    | SNP | FANCG           | ENST00000378643 | -1 | intronic                    | c.777+27          | e6+27              | tier3 | 40  | 0 | 0.000 | 100  | 46   | 0.315 |
| 329866 | 9  | 36204051  | 36204051  | C   | G    | SNP | CLTA            | ENST00000464497 | 1  | intronic                    | c.374-14          | e4-14              | tier3 | 34  | 0 | 0.000 | 83   | 59   | 0.416 |
| 329866 | 9  | 68433510  | 68433510  | C   | G    | SNP | ENSG00000215548 | ENST00000376334 | -1 | 5_prime_untranslated_region | c.-68433510       | NULL               | tier3 | 83  | 0 | 0.000 | 204  | 26   | 0.113 |
| 329866 | 10 | 112360315 | 112360316 | -   | T    | INS | SMC3            | ENST00000361804 | -1 | intronic                    | c.2535+11_2535+10 | e22+11             | tier3 | 135 | 1 | 0.007 | 278  | 26   | 0.086 |
| 329866 | 11 | 20178072  | 20178072  | C   | T    | SNP | DBX1            | ENST00000227256 | -1 | silent                      | c.837             | p.K279             | tier1 | 67  | 1 | 0.015 | 203  | 106  | 0.343 |
| 329866 | 12 | 22211533  | 22211533  | C   | G    | SNP | CMAS            | ENST00000229329 | 1  | missense                    | c.592             | p.P198A            | tier1 | 86  | 0 | 0.000 | 187  | 55   | 0.227 |
| 329866 | 12 | 22211534  | 22211534  | C   | T    | SNP | CMAS            | ENST00000229329 | 1  | missense                    | c.593             | p.P198L            | tier1 | 86  | 0 | 0.000 | 189  | 55   | 0.225 |
| 329866 | 12 | 57037304  | 57037304  | T   | C    | SNP | ATP5B           | ENST00000552959 | -1 | missense                    | c.484             | p.S162G            | tier1 | 32  | 0 | 0.000 | 88   | 46   | 0.343 |
| 329866 | 12 | 114832571 | 114832571 | G   | A    | SNP | TBX5            | ENST00000310346 | -1 | missense                    | c.638             | p.A213V            | tier1 | 43  | 0 | 0.000 | 113  | 55   | 0.327 |
| 329866 | 16 | 50750582  | 50750583  | -   | T    | INS | NOD2            | ENST00000300589 | 1  | splice_site_ins             | c.2546+1_2546+1   | e5+1               | tier1 | 47  | 0 | 0.000 | 120  | 34   | 0.221 |
| 329866 | 16 | 89776108  | 89776108  | G   | A    | SNP | VPS9D1          | ENST00000389386 | -1 | intronic                    | c.1388+77         | e11+77             | tier3 | 20  | 0 | 0.000 | 52   | 40   | 0.435 |
| 329866 | 17 | 7577581   | 7577581   | A   | C    | SNP | TP53            | ENST00000269305 | -1 | missense                    | c.700             | p.Y234D            | tier1 | 658 | 0 | 0.000 | 326  | 1371 | 0.806 |
| 329866 | 17 | 40342300  | 40342300  | C   | A    | SNP | GHDC            | ENST00000436923 | -1 | missense                    | c.1366            | p.V456F            | tier1 | 63  | 0 | 0.000 | 88   | 44   | 0.331 |
| 329866 | 19 | 7796670   | 7796670   | G   | -    | DEL | CLEC4G          | ENST00000328853 | -1 | intronic                    | c.56-13           | e2-13              | tier3 | 25  | 0 | 0.000 | 49   | 27   | 0.355 |
| 329866 | 20 | 29623180  | 29623180  | T   | C    | SNP | FRG1B           | ENST00000482423 | 1  | rna                         | NULL              | NULL               | tier1 | 618 | 3 | 0.005 | 2127 | 56   | 0.026 |
| 329866 | 20 | 62326771  | 62326771  | G   | C    | SNP | RTEL1           | ENST00000318100 | 1  | missense                    | c.3590            | p.G1197A           | tier1 | 188 | 0 | 0.000 | 385  | 174  | 0.311 |
| 329866 | 21 | 40823790  | 40823790  | C   | T    | SNP | SH3BGR          | ENST00000333634 | 1  | 5_prime_untranslated_region | c.-44             | NULL               | tier3 | 44  | 0 | 0.000 | 121  | 69   | 0.363 |
| 340060 | 1  | 115258747 | 115258747 | C   | T    | SNP | NRAS            | ENST00000369535 | -1 | missense                    | c.35              | p.G12D             | tier1 | 534 | 5 | 0.009 | 614  | 32   | 0.050 |
| 340060 | 1  | 207888661 | 207888661 | T   | C    | SNP | CR1L            | ENST00000294997 | 1  | nonstop                     | c.1165            | p.*389R            | tier1 | 223 | 0 | 0.000 | 354  | 16   | 0.043 |
| 340060 | 2  | 55808823  | 55808825  | AAG | -    | DEL | SMEK2           | ENST00000272313 | -1 | in_frame_del                | c.1245_1243       | p.L415in_frame_del | tier1 | 44  | 1 | 0.022 | 86   | 26   | 0.232 |
| 340060 | 2  | 105897181 | 105897181 | C   | A    | SNP | TGFBRAP1        | ENST00000258449 | -1 | splice_site                 | c.1122-1          | e5-1               | tier1 | 42  | 1 | 0.023 | 55   | 29   | 0.345 |
| 340060 | 3  | 58368237  | 58368237  | A   | T    | SNP | PXK             | ENST00000356151 | 1  | splice_region               | c.202-4           | e4-4               | tier3 | 50  | 0 | 0.000 | 88   | 38   | 0.302 |
| 340060 | 4  | 24422954  | 24422954  | A   | T    | SNP | ENSG00000222262 | ENST00000410330 | -1 | 5_prime_flanking_region     | c.-30             | NULL               | tier4 | 70  | 1 | 0.014 | 162  | 75   | 0.314 |
| 340060 | 4  | 141786725 | 141786725 | A   | T    | SNP | RNF150          | ENST00000515673 | -1 | 3_prime_untranslated_region | c.*2690           | NULL               | tier3 | 58  | 0 | 0.000 | 133  | 23   | 0.147 |
| 340060 | 5  | 31267727  | 31267727  | C   | A    | SNP | CDH6            | ENST00000265071 | 1  | missense                    | c.147             | p.N49K             | tier1 | 102 | 0 | 0.000 | 164  | 13   | 0.073 |
| 340060 | 5  | 122941019 | 122941019 | G   | T    | SNP | C5NK1G3         | ENST00000360683 | 1  | intronic                    | c.1290-14         | e12-14             | tier3 | 78  | 0 | 0.000 | 134  | 21   | 0.132 |
| 340060 | 5  | 134063500 | 134063500 | A   | -    | DEL | SEC24A          | ENST00000398844 | 1  | 3_prime_untranslated_region | c.*2716           | NULL               | tier3 | 55  | 0 | 0.000 | 163  | 21   | 0.114 |
| 340060 | 6  | 108882438 | 108882438 | C   | T    | SNP | FOXO3           | ENST00000343882 | 1  | silent                      | c.27              | p.A9               | tier1 | 18  | 0 | 0.000 | 5    | 5    | 0.500 |
| 340060 | 7  | 43548582  | 43548582  | G   | A    | SNP | HECW1           | ENST00000395891 | 1  | missense                    | c.3881            | p.G1294D           | tier1 | 665 | 1 | 0.002 | 881  | 43   | 0.047 |
| 340060 | 9  | 139997711 | 139997711 | T   | G    | SNP | MAN1B1          | ENST00000536349 | 1  | 3_prime_untranslated_region | c.*139997711      | NULL               | tier3 | 118 | 1 | 0.008 | 162  | 18   | 0.099 |
| 340060 | 10 | 112356156 | 112356156 | G   | T    | SNP | SMC3            | ENST00000361804 | 1  | missense                    | c.1964            | p.G655V            | tier1 | 434 | 1 | 0.002 | 732  | 95   | 0.115 |
| 340060 | 11 | 32429666  | 32429666  | G   | A    | SNP | WT1             | ENST00000332351 | -1 | intronic                    | c.1002-8076       | e6-8076            | tier4 | 6   | 0 | 0.000 | 6    | 12   | 0.667 |
| 340060 | 12 | 43827516  | 43827516  | C   | A    | SNP | ADAMTS20        | ENST00000389420 | -1 | intronic                    | c.2720+532        | e19+532            | tier4 | 52  | 0 | 0.000 | 63   | 16   | 0.203 |
| 340060 | 12 | 72067980  | 72067980  | A   | T    | SNP | THAP2           | ENST00000308086 | 1  | splice_region               | c.72-3            | e2-3               | tier2 | 67  | 0 | 0.000 | 136  | 15   | 0.098 |
| 340060 | 13 | 28592642  | 28592642  | C   | A    | SNP | FLT3            | ENST00000380982 | -1 | missense                    | c.2503            | p.D835Y            | tier1 | 457 | 1 | 0.002 | 757  | 43   | 0.054 |
| 340060 | 14 | 58038541  | 58038541  | A   | C    | SNP | SLC35F4         | ENST00000339762 | -1 | intronic                    | c.1041+71         | e5+71              | tier3 | 41  | 0 | 0.000 | 80   | 15   | 0.158 |
| 340060 | 15 | 85805938  | 85805938  | G   | A    | SNP | ENSG00000218052 | ENST00000561209 | -1 | 5_prime_untranslated_region | c.-85805938       | NULL               | tier3 | 124 | 0 | 0.000 | 210  | 16   | 0.071 |
| 340060 | 16 | 15227776  | 15227776  | G   | A    | SNP | PKD1P6          | ENST00000540502 | -1 | rna                         | NULL              | NULL               | tier1 | 49  | 1 | 0.020 | 63   | 29   | 0.315 |
| 340060 | 17 | 61995194  | 61995194  | C   | G    | SNP | GH1             | ENST00000323322 | -1 | missense                    | c.382             | p.V128L            | tier1 | 96  | 0 | 0.000 | 164  | 23   | 0.122 |
| 340060 | 18 | 30908069  | 30908069  | T   | G    | SNP | CCDC178         | ENST00000406524 | -1 | intronic                    | c.880-4472        | e9-4472            | tier4 | 74  | 0 | 0.000 | 323  | 31   | 0.088 |
| 346313 | 1  | 24294362  | 24294362  | A   | T    | SNP | SRSF10          | ENST00000374452 | -1 | 3_prime_untranslated_region | c.*54             | NULL               | tier4 | 117 | 4 | 0.033 | 55   | 14   | 0.203 |
| 346313 | 1  | 89353241  | 89353241  | G   | C    | SNP | GTF2B           | ENST00000370500 | -1 | intronic                    | c.18-191          | e2-191             | tier3 | 58  | 0 | 0.000 | 34   | 155  | 0.816 |
| 346313 | 1  | 115258744 | 115258744 | C   | T    | SNP | NRAS            | ENST00000369535 | -1 | missense                    | c.38              | p.G13D             | tier1 | 456 | 2 | 0.004 | 520  | 253  | 0.327 |
| 346313 | 1  | 159038320 | 159038320 | T   | -    | DEL | AIM2            | ENST00000368130 | -1 | intronic                    | c.396+38          | e2+38              | tier3 | 100 | 0 | 0.000 | 114  | 63   | 0.356 |
| 346313 | 1  | 185815276 | 185815276 | G   | A    | SNP | HMCN1           | ENST00000271588 | 1  | intronic                    | c.339+48          | e2+48              | tier3 | 319 | 1 | 0.003 | 437  | 286  | 0.395 |
| 346313 | 1  | 237494338 | 237494338 | G   | A    | SNP | RYR2            | ENST00000360064 | 1  | intronic                    | c.270+52          | e4+52              | tier3 | 130 | 0 | 0.000 | 139  | 94   | 0.403 |
| 346313 | 2  | 79914651  | 79914651  | C   | T    | SNP | CTNNA2          | ENST00000361291 | 1  | intronic                    | c.204+35867       | e2+35867           | tier3 | 116 | 2 | 0.017 | 124  | 57   | 0.313 |
| 346313 | 2  | 95976762  | 95976762  | G   | A    | SNP | KCNIP3          | ENST00000475491 | 1  | 3_prime_untranslated_region | c.*95976762       | NULL               | tier3 | 43  | 0 | 0.000 | 37   | 21   | 0.362 |
| 346313 | 2  | 97493997  | 97493997  | C   | T    | SNP | CNNM3           | ENST00000465224 | 1  | 3_prime_untranslated_region | c.*97493997       | NULL               | tier3 | 35  | 0 | 0.000 | 42   | 16   | 0.276 |
| 346313 | 2  | 103148926 | 103148926 | G   | A    | SNP | SLC9A4          | ENST00000295269 | 1  | missense                    | c.2176            | p.G726S            | tier1 | 87  | 2 | 0.022 | 103  | 65   | 0.376 |
| 346313 | 2  | 130796690 | 130796690 | C   | T    | SNP | LOC440905       | ENST00000325390 | -1 | intronic                    | c.NULL            | NULL               | tier3 | 89  | 1 | 0.011 | 197  | 27   | 0.121 |
| 346313 | 2  | 198267359 | 198267359 | C   | A    | SNP | SF3B1           | ENST00000335508 | -1 | missense                    | c.1998            | p.K666N            | tier1 | 739 | 6 | 0.008 | 786  | 514  | 0.395 |
| 346313 | 3  | 124180873 | 124180873 | A   | G    | SNP | KALRN           | ENST00000360013 | 1  | intronic                    | c.3915+70         | e24+70             | tier3 | 108 | 0 | 0.000 | 127  | 74   | 0.366 |
| 346313 | 3  | 157363624 | 157363624 | A   | T    | SNP | C3orf55         | ENST00000461040 | 1  | nonsense                    | c.151             | p.K51*             | tier1 | 111 | 2 | 0.018 | 117  | 56   | 0.324 |
| 346313 | 3  | 185362401 | 185362401 | C   | T    | SNP | IGF2BP2         | ENST00000382199 | -1 | 3_prime_untranslated_region | c.*918            | NULL               | tier3 | 45  | 0 | 0.000 | 32   | 23   | 0.397 |
| 346313 | 4  | 1389054   | 1389055   | -   | CA   | INS | CRIPAK          | ENST00000324803 | 1  | frame_shift_ins             | c.755_756         | p.C254fs           | tier1 | 107 | 1 | 0.009 | 126  | 20   | 0.137 |
| 346313 | 4  | 47888007  | 47888007  | T   | C    | SNP | NFXL1           | ENST00000381538 | -1 | missense                    | c.1553            | p.Y518C            | tier1 | 75  | 0 | 0.000 | 64   | 41   | 0.387 |
| 346313 | 5  | 128365287 | 128365287 | G   | A    | SNP | SLC27A6         | ENST00000262462 | 1  | missense                    | c.1570            | p.G524R            | tier1 | 53  | 0 | 0.000 | 196  | 108  | 0.354 |
| 346313 | 5  | 170837545 | 170837546 | -   | TGTT | INS | NPM1            | ENST00000296930 | 1  | frame_shift_ins             | c.861_862         | p.W287fs           | tier1 | 229 | 0 | 0.000 | 641  | 247  | 0.278 |
| 346313 | 5  | 180659955 | 180659955 | C   | T    | SNP | TRIM41          | ENST00000515223 | 1  | 3_prime_untranslated_region | c.*180659955      | NULL               | tier3 | 69  | 0 | 0.000 | 77   | 38   | 0.330 |
| 346313 | 7  | 112077307 | 112077307 | A   | C    | SNP | IFRD1           | ENST00000443101 | 1  | 5_prime_untranslated_region | c.-18567          | NULL               | tier4 | 94  | 0 | 0.000 | 129  | 100  | 0.435 |
| 346313 | 7  | 141794384 | 141794384 | G   | A    | SNP | MGAM            | ENST00000549489 | 1  | intronic                    | c.4619-36         | e38-36             | tier3 | 46  | 4 | 0.080 | 27   | 66   | 0.710 |
| 346313 | 8  | 33356644  | 33356644  | T   | C    | SNP | TTI2            | ENST00000360742 | -1 | 3_prime_untranslated_region | c.*47             | NULL               | tier3 | 98  | 0 | 0.000 | 120  | 55   | 0.314 |
| 346313 | 8  | 39111964  | 39111964  | C   | T    | SNP | ADAM32          | ENST00000379907 | 1  | missense                    | c.1934            | p.S645L            | tier1 | 142 | 0 | 0.000 | 139  | 103  | 0.426 |
| 346313 | 8  | 56362027  | 56362027  | G   | A    | SNP | XKR4            | ENST00000327381 | 1  | intronic                    | c.1007-73813      | e3-73813           | tier2 | 413 | 0 | 0.000 | 331  | 281  | 0.456 |
| 346313 | 9  | 2058252   | 2058252   | A   | T    | SNP | SMARCA2         | ENST00000349721 | 1  | intronic                    | c.1348-39         | e7-39              | tier3 | 91  | 0 | 0.000 | 131  | 54   | 0.292 |
| 346313 | 9  | 84548900  | 84548900  | C   | A    | SNP | SPATA31D4       | ENST00000341875 | 1  | rna                         | NULL              | NULL               | tier1 | 75  | 0 | 0.000 | 86   | 57   | 0.399 |
|        |    |           |           |     |      |     |                 |                 |    |                             |                   |                    |       |     |   |       |      |      |       |

|        |    |           |           |   |    |     |                 |                 |    |                             |               |          |       |      |   |       |      |     |       |
|--------|----|-----------|-----------|---|----|-----|-----------------|-----------------|----|-----------------------------|---------------|----------|-------|------|---|-------|------|-----|-------|
| 346313 | 11 | 74880778  | 74880778  | C | T  | SNP | SLCO2B1         | ENST00000289575 | 1  | silent                      | c.750         | p.R250   | tier1 | 50   | 0 | 0.000 | 39   | 35  | 0.473 |
| 346313 | 12 | 8073897   | 8073897   | G | A  | SNP | SLC2A3          | ENST00000469295 | -1 | 5_prime_untranslated_region | c.-8073897    | NULL     | tier3 | 135  | 1 | 0.007 | 213  | 18  | 0.078 |
| 346313 | 12 | 22606832  | 22606832  | G | C  | SNP | C2CD5           | ENST00000333957 | -1 | missense                    | c.2869        | p.Q957E  | tier1 | 84   | 0 | 0.000 | 99   | 59  | 0.373 |
| 346313 | 12 | 112926910 | 112926910 | G | C  | SNP | PTPN11          | ENST00000351677 | 1  | missense                    | c.1530        | p.Q510H  | tier1 | 758  | 0 | 0.000 | 1191 | 33  | 0.027 |
| 346313 | 12 | 133384599 | 133384599 | C | T  | SNP | GOLGA3          | ENST00000204726 | -1 | silent                      | c.1056        | p.A352   | tier1 | 102  | 0 | 0.000 | 85   | 50  | 0.368 |
| 346313 | 13 | 95363388  | 95363388  | G | A  | SNP | SOX21           | ENST00000376945 | -1 | 3_prime_untranslated_region | c.*85         | NULL     | tier2 | 52   | 0 | 0.000 | 53   | 34  | 0.391 |
| 346313 | 13 | 99030086  | 99030086  | C | T  | SNP | FARP1           | ENST00000376586 | 1  | missense                    | c.410         | p.A137V  | tier1 | 64   | 0 | 0.000 | 69   | 36  | 0.343 |
| 346313 | 14 | 38274022  | 38274022  | A | T  | SNP | TTC6            | ENST00000478811 | 1  | splice_region               | c.357+3       | e3+3     | tier3 | 167  | 1 | 0.006 | 191  | 110 | 0.365 |
| 346313 | 14 | 70442537  | 70442537  | G | A  | SNP | SMOC1           | ENST00000361956 | 1  | splice_region               | c.478+6       | e4+6     | tier2 | 107  | 0 | 0.000 | 94   | 44  | 0.319 |
| 346313 | 14 | 101429460 | 101429460 | A | T  | SNP | SNORD114-7      | ENST00000362520 | 1  | rna                         | NULL          | NULL     | tier1 | 30   | 0 | 0.000 | 67   | 41  | 0.380 |
| 346313 | 15 | 92397297  | 92397298  | - | GT | INS | SLCO3A1         | ENST00000318445 | 1  | frame_shift_ins             | c.159_160     | p.G53fs  | tier1 | 25   | 0 | 0.000 | 34   | 14  | 0.292 |
| 346313 | 16 | 790001    | 790001    | G | A  | SNP | NARFL           | ENST00000540986 | -1 | 5_prime_untranslated_region | c.-3603       | NULL     | tier3 | 27   | 0 | 0.000 | 47   | 34  | 0.420 |
| 346313 | 17 | 45664777  | 45664777  | T | C  | SNP | NPEPPS          | ENST00000322157 | 1  | intronic                    | c.1095+67     | e9+67    | tier3 | 88   | 0 | 0.000 | 104  | 61  | 0.370 |
| 346313 | 19 | 35991219  | 35991219  | T | C  | SNP | DMKN            | ENST00000469960 | -1 | 5_prime_untranslated_region | c.-35991219   | NULL     | tier3 | 50   | 0 | 0.000 | 51   | 27  | 0.346 |
| 346313 | 19 | 38782452  | 38782452  | C | T  | SNP | SPINT2          | ENST00000585357 | 1  | 3_prime_untranslated_region | c.*38782452   | NULL     | tier3 | 72   | 0 | 0.000 | 73   | 34  | 0.315 |
| 346313 | 20 | 29633902  | 29633902  | C | A  | SNP | FRG1B           | ENST00000278882 | 1  | missense                    | c.541         | p.P181T  | tier1 | 95   | 0 | 0.000 | 537  | 41  | 0.071 |
| 346313 | 21 | 11039295  | 11039295  | C | G  | SNP | BAGE2           | ENST00000470054 | -1 | rna                         | NULL          | NULL     | tier1 | 2708 | 1 | 0.000 | 5435 | 378 | 0.065 |
| 346313 | 21 | 45744779  | 45744779  | T | G  | SNP | PFKL            | ENST00000403390 | 1  | missense                    | c.1997        | p.I666S  | tier1 | 85   | 0 | 0.000 | 61   | 31  | 0.333 |
| 346313 | X  | 19037686  | 19037686  | A | T  | SNP | GPR64           | ENST00000479496 | -1 | 5_prime_untranslated_region | c.-19037686   | NULL     | tier4 | 46   | 0 | 0.000 | 76   | 15  | 0.163 |
| 346313 | X  | 123164976 | 123164977 | - | T  | INS | STAG2           | ENST00000218089 | 1  | splice_site_ins             | c.288+1_288+1 | e3+1     | tier1 | 293  | 0 | 0.000 | 142  | 477 | 0.771 |
| 346313 | Y  | 28654460  | 28654460  | C | T  | SNP | TPTE2P4         | ENST00000258589 | 1  | intronic                    | c.NULL        | NULL     | tier3 | 84   | 0 | 0.000 | 39   | 102 | 0.713 |
| 350719 | 17 | 7577568   | 7577568   | C | T  | SNP | TP53            | ENST00000269305 | -1 | missense                    | c.713         | p.C238Y  | tier1 | 494  | 0 | 0.000 | 1426 | 85  | 0.056 |
| 350719 | 18 | 15272098  | 15272098  | C | A  | SNP | BNIP3P3         | ENST00000577336 | -1 | 5_prime_flanking_region     | c.-24102      | NULL     | tier3 | 72   | 2 | 0.027 | 367  | 71  | 0.162 |
| 350719 | 19 | 46214702  | 46214702  | A | T  | SNP | FBXO46          | ENST00000317683 | -1 | 3_prime_untranslated_region | c.*240        | NULL     | tier2 | 87   | 1 | 0.011 | 214  | 28  | 0.114 |
| 353053 | 1  | 20881411  | 20881412  | - | C  | INS | FAM43B          | ENST00000332947 | 1  | 3_prime_untranslated_region | c.*955        | NULL     | tier3 | 45   | 0 | 0.000 | 87   | 18  | 0.171 |
| 353053 | 1  | 20981993  | 20981993  | A | G  | SNP | DDOST           | ENST00000375048 | -1 | missense                    | c.542         | p.L181P  | tier1 | 43   | 0 | 0.000 | 75   | 16  | 0.176 |
| 353053 | 1  | 196887311 | 196887311 | T | C  | SNP | CFHR4           | ENST00000367416 | 1  | intronic                    | c.1538-29     | e10-29   | tier2 | 68   | 0 | 0.000 | 83   | 11  | 0.117 |
| 353053 | 1  | 205801794 | 205801794 | G | A  | SNP | PM20D1          | ENST00000367136 | -1 | missense                    | c.1217        | p.A406V  | tier1 | 165  | 0 | 0.000 | 256  | 29  | 0.102 |
| 353053 | 1  | 222833276 | 222833276 | A | G  | SNP | MIA3            | ENST00000344441 | 1  | missense                    | c.4903        | p.M1635V | tier1 | 62   | 0 | 0.000 | 98   | 19  | 0.162 |
| 353053 | 5  | 14713807  | 14713807  | G | A  | SNP | ANKH            | ENST00000284268 | -1 | intronic                    | c.1142-31     | e10-31   | tier3 | 56   | 0 | 0.000 | 97   | 20  | 0.171 |
| 353053 | 7  | 139094357 | 139094357 | C | T  | SNP | LUC7L2          | ENST00000541515 | 1  | nonsense                    | c.934         | p.R312*  | tier1 | 449  | 0 | 0.000 | 741  | 63  | 0.078 |
| 353053 | 9  | 135073547 | 135073547 | C | T  | SNP | NTNG2           | ENST00000360670 | 1  | silent                      | c.408         | p.D136   | tier1 | 88   | 0 | 0.000 | 111  | 11  | 0.090 |
| 353053 | 11 | 75141266  | 75141266  | C | T  | SNP | KLHL35          | ENST00000539798 | -1 | missense                    | c.409         | p.G137S  | tier1 | 6    | 0 | 0.000 | 5    | 12  | 0.706 |
| 353053 | 12 | 102291646 | 102291646 | C | T  | SNP | DRAM1           | ENST00000258534 | 1  | missense                    | c.137         | p.T46M   | tier1 | 85   | 0 | 0.000 | 145  | 15  | 0.094 |
| 353053 | 12 | 102576308 | 102576308 | T | -  | DEL | PARPBP          | ENST00000358383 | 1  | intronic                    | c.1185-19     | e8-19    | tier3 | 55   | 1 | 0.018 | 112  | 23  | 0.170 |
| 353053 | 13 | 98634738  | 98634738  | T | -  | DEL | IPO5            | ENST00000261574 | 1  | intronic                    | c.145-19      | e3-19    | tier3 | 63   | 1 | 0.016 | 95   | 18  | 0.159 |
| 353053 | 13 | 113538580 | 113538580 | C | A  | SNP | ATP11A          | ENST00000375630 | 1  | 3_prime_untranslated_region | c.*2202       | NULL     | tier2 | 153  | 0 | 0.000 | 156  | 12  | 0.071 |
| 353053 | 15 | 23689650  | 23689650  | G | A  | SNP | GOLGA6L2        | ENST00000312015 | -1 | splice_region               | c.214-3       | e3-3     | tier3 | 149  | 0 | 0.000 | 277  | 32  | 0.104 |
| 353053 | 15 | 45392025  | 45392025  | G | A  | SNP | DUOX2           | ENST00000389039 | -1 | nonsense                    | c.3250        | p.R1084* | tier1 | 65   | 0 | 0.000 | 102  | 16  | 0.136 |
| 353053 | 17 | 16723414  | 16723414  | C | T  | SNP | ENSG00000226145 | ENST00000417510 | -1 | splice_site                 | c.NULL        | NULL     | tier1 | 190  | 0 | 0.000 | 221  | 20  | 0.083 |
| 353053 | 21 | 36164611  | 36164611  | C | A  | SNP | RUNX1           | ENST00000300305 | -1 | nonsense                    | c.1264        | p.E422*  | tier1 | 706  | 1 | 0.001 | 833  | 106 | 0.113 |
| 353053 | X  | 102840637 | 102840637 | T | G  | SNP | TCEAL4          | ENST00000372629 | 1  | missense                    | c.268         | p.W90G   | tier1 | 76   | 2 | 0.026 | 88   | 19  | 0.176 |
| 353053 | X  | 133547986 | 133547986 | A | G  | SNP | PHF6            | ENST00000394292 | 1  | missense                    | c.722         | p.Y241C  | tier1 | 392  | 0 | 0.000 | 601  | 84  | 0.123 |
| 368402 | 1  | 154215669 | 154215669 | G | A  | SNP | UBAP2L          | ENST00000466173 | 1  | 3_prime_untranslated_region | c.*154215669  | NULL     | tier3 | 79   | 1 | 0.013 | 228  | 59  | 0.206 |
| 368402 | 1  | 216723715 | 216723715 | C | T  | SNP | ESRRG           | ENST00000408911 | -1 | intronic                    | c.862+13846   | e5+13846 | tier2 | 118  | 0 | 0.000 | 281  | 62  | 0.181 |
| 368402 | 2  | 11702607  | 11702607  | A | G  | SNP | GREB1           | ENST00000234142 | 1  | missense                    | c.176         | p.N59S   | tier1 | 27   | 0 | 0.000 | 206  | 62  | 0.231 |
| 368402 | 2  | 20460043  | 20460043  | C | A  | SNP | PUM2            | ENST00000361078 | -1 | intronic                    | c.2355+55     | e14+55   | tier2 | 51   | 1 | 0.019 | 86   | 20  | 0.189 |
| 368402 | 2  | 179596201 | 179596201 | T | A  | SNP | TTN             | ENST00000342992 | -1 | silent                      | c.13560       | p.L4520  | tier1 | 79   | 0 | 0.000 | 213  | 36  | 0.145 |
| 368402 | 3  | 38418449  | 38418449  | T | C  | SNP | XYLB            | ENST00000207870 | 1  | silent                      | c.1161        | p.I387   | tier1 | 107  | 2 | 0.018 | 189  | 47  | 0.198 |
| 368402 | 4  | 22421553  | 22421553  | C | T  | SNP | GPR125          | ENST00000334304 | -1 | intronic                    | c.1809+956    | e12+956  | tier3 | 97   | 1 | 0.010 | 120  | 30  | 0.200 |
| 368402 | 4  | 140432050 | 140432050 | T | C  | SNP | SETD7           | ENST00000274031 | -1 | 3_prime_untranslated_region | c.*767        | NULL     | tier3 | 126  | 0 | 0.000 | 191  | 41  | 0.177 |
| 368402 | 4  | 166915437 | 166915437 | A | T  | SNP | TLL1            | ENST00000061240 | 1  | intronic                    | c.362-96      | e4-96    | tier3 | 188  | 0 | 0.000 | 184  | 48  | 0.206 |
| 368402 | 5  | 37239010  | 37239010  | C | -  | DEL | C5orf42         | ENST00000425232 | -1 | frame_shift_del             | c.887         | p.S296fs | tier1 | 124  | 1 | 0.008 | 351  | 82  | 0.189 |
| 368402 | 5  | 115319116 | 115319116 | G | A  | SNP | AQPEP           | ENST00000357872 | 1  | missense                    | c.828         | p.M276I  | tier1 | 77   | 1 | 0.013 | 183  | 35  | 0.160 |
| 368402 | 5  | 156924056 | 156924056 | C | T  | SNP | ADAM19          | ENST00000517374 | -1 | missense                    | c.152         | p.S51N   | tier1 | 22   | 0 | 0.000 | 169  | 57  | 0.252 |
| 368402 | 7  | 44105132  | 44105132  | G | A  | SNP | PGAM2           | ENST00000297283 | -1 | 5_prime_untranslated_region | c.-4          | NULL     | tier3 | 8    | 0 | 0.000 | 67   | 80  | 0.544 |
| 368402 | 9  | 78973756  | 78973756  | G | A  | SNP | PCSK5           | ENST00000545128 | 1  | missense                    | c.5501        | p.R1834Q | tier1 | 44   | 0 | 0.000 | 195  | 52  | 0.210 |
| 368402 | 9  | 79319663  | 79319663  | G | A  | SNP | PRUNE2          | ENST00000428286 | -1 | intronic                    | c.6436+14     | e1+14    | tier2 | 108  | 0 | 0.000 | 237  | 49  | 0.171 |
| 368402 | 9  | 79319664  | 79319664  | G | T  | SNP | PRUNE2          | ENST00000428286 | -1 | intronic                    | c.6436+13     | e1+13    | tier2 | 107  | 0 | 0.000 | 236  | 49  | 0.172 |
| 368402 | 10 | 115963109 | 115963109 | C | A  | SNP | TDRD1           | ENST00000251864 | 1  | intronic                    | c.802-38      | e7-38    | tier3 | 114  | 0 | 0.000 | 124  | 40  | 0.244 |
| 368402 | 12 | 124826497 | 124826497 | T | C  | SNP | NCOR2           | ENST00000356219 | -1 | missense                    | c.5081        | p.N1694S | tier1 | 42   | 0 | 0.000 | 379  | 94  | 0.198 |
| 368402 | 12 | 132505857 | 132505857 | C | T  | SNP | EP400           | ENST00000333577 | 1  | missense                    | c.4789        | p.R1597C | tier1 | 38   | 0 | 0.000 | 334  | 66  | 0.165 |
| 368402 | 16 | 34290568  | 34290568  | G | G  | SNP | CCNYL3          | ENST00000407030 | 1  | 3_prime_untranslated_region | c.*34290568   | NULL     | tier3 | 88   | 2 | 0.022 | 138  | 41  | 0.228 |
| 368402 | 17 | 74732959  | 74732959  | C | C  | SNP | SRSF2           | ENST00000392485 | -1 | missense                    | c.284         | p.P95R   | tier1 | 43   | 0 | 0.000 | 439  | 118 | 0.212 |
| 368402 | 17 | 78700994  | 78700994  | C | T  | SNP | RPTOR           | ENST00000306801 | 1  | intronic                    | c.508-3366    | e5-3366  | tier3 | 44   | 0 | 0.000 | 435  | 103 | 0.191 |
| 368402 | 17 | 79563240  | 79563240  | C | T  | SNP | NPLOC4          | ENST00000374747 | -1 | missense                    | c.1022        | p.C341Y  | tier1 | 47   | 0 | 0.000 | 177  | 38  | 0.177 |
| 368402 | 19 | 9025669   | 9025669   | G | A  | SNP | MUC16           | ENST00000397910 | -1 | intronic                    | c.36796-11    | e15-11   | tier3 | 204  | 1 | 0.005 | 1554 | 72  | 0.044 |
| 368402 | 21 | 36231802  | 36231802  | T | A  | SNP | RUNX1           | ENST00000300305 | -1 | missense                    | c.582         | p.K194N  | tier1 | 228  | 1 | 0.004 | 1359 | 318 | 0.190 |
| 368402 | 21 | 36259137  | 36259137  | T | C  | SNP | RUNX1           | ENST0000        |    |                             |               |          |       |      |   |       |      |     |       |

|        |    |           |           |                             |    |     |                 |                 |    |                             |                 |          |       |     |   |       |      |     |       |
|--------|----|-----------|-----------|-----------------------------|----|-----|-----------------|-----------------|----|-----------------------------|-----------------|----------|-------|-----|---|-------|------|-----|-------|
| 377158 | 1  | 226413278 | 226413278 | C                           | A  | SNP | MIXL1           | ENST00000366810 | 1  | missense                    | c.464           | p.P155Q  | tier1 | 58  | 3 | 0.049 | 116  | 92  | 0.442 |
| 377158 | 3  | 1415578   | 1415578   | C                           | T  | SNP | CNTN6           | ENST00000350110 | 1  | intronic                    | c.1946-30       | e15-30   | tier3 | 53  | 0 | 0.000 | 178  | 110 | 0.382 |
| 377158 | 4  | 123260564 | 123260564 | G                           | A  | SNP | KIAA1109        | ENST00000264501 | 1  | splice_site                 | c.12352+1       | e70+1    | tier1 | 14  | 0 | 0.000 | 85   | 79  | 0.482 |
| 377158 | 4  | 156135650 | 156135650 | C                           | T  | SNP | NPY2R           | ENST00000329476 | 1  | missense                    | c.559           | p.R187W  | tier1 | 33  | 0 | 0.000 | 48   | 30  | 0.385 |
| 377158 | 4  | 186920705 | 186920705 | G                           | C  | SNP | SORBS2          | ENST00000284776 | -1 | 5_prime_flanking_region     | c.-337354       | NULL     | tier3 | 199 | 3 | 0.015 | 432  | 41  | 0.087 |
| 377158 | 5  | 140532032 | 140532032 | G                           | C  | SNP | PCDH6           | ENST00000231136 | 1  | missense                    | c.2194          | p.G732R  | tier1 | 188 | 1 | 0.005 | 214  | 172 | 0.444 |
| 377158 | 5  | 141233621 | 141233621 | C                           | T  | SNP | PCDH1           | ENST00000287008 | -1 | missense                    | c.3700          | p.E1234K | tier1 | 123 | 1 | 0.008 | 173  | 129 | 0.427 |
| 377158 | 7  | 44268486  | 44268486  | C                           | T  | SNP | CAMK2B          | ENST00000395749 | -1 | silent                      | c.1377          | p.R459   | tier1 | 79  | 0 | 0.000 | 88   | 56  | 0.386 |
| 377158 | 7  | 76162997  | 76162997  | C                           | T  | SNP | UPK3B           | ENST00000419923 | 1  | intronic                    | c.963+18224     | e4+18224 | tier2 | 183 | 0 | 0.000 | 293  | 195 | 0.400 |
| 377158 | 7  | 100636426 | 100636426 | C                           | T  | SNP | MUC12           | ENST00000536621 | 1  | missense                    | c.2582          | p.T861M  | tier1 | 17  | 0 | 0.000 | 33   | 38  | 0.535 |
| 377158 | 7  | 102257060 | 102257060 | G                           | A  | SNP | RASA4           | ENST00000462172 | -1 | 5_prime_untranslated_region | c.-7253         | NULL     | tier2 | 191 | 0 | 0.000 | 490  | 58  | 0.106 |
| 377158 | 7  | 129083907 | 129083907 | G                           | A  | SNP | STRIP2          | ENST00000249344 | 1  | missense                    | c.242           | p.R81K   | tier1 | 160 | 1 | 0.006 | 530  | 407 | 0.433 |
| 377158 | 8  | 1616604   | 1616604   | C                           | T  | SNP | DLGAP2          | ENST00000520901 | 1  | missense                    | c.1730          | p.T577M  | tier1 | 103 | 4 | 0.037 | 72   | 65  | 0.471 |
| 377158 | 8  | 93029456  | 93029456  | G                           | A  | SNP | RUNX1T1         | ENST00000436581 | -1 | missense                    | c.257           | p.T86M   | tier1 | 418 | 0 | 0.000 | 693  | 480 | 0.409 |
| 377158 | 9  | 68438490  | 68438490  | T                           | C  | SNP | ENSG00000215548 | ENST00000376334 | -1 | intronic                    | c.NULL          | NULL     | tier3 | 134 | 2 | 0.015 | 719  | 65  | 0.083 |
| 377158 | 9  | 68438491  | 68438491  | T                           | C  | SNP | ENSG00000215548 | ENST00000376334 | -1 | intronic                    | c.NULL          | NULL     | tier3 | 134 | 2 | 0.015 | 720  | 64  | 0.082 |
| 377158 | 10 | 125521468 | 125521468 | C                           | A  | SNP | CPXM2           | ENST00000241305 | -1 | missense                    | c.1697          | p.R566L  | tier1 | 128 | 0 | 0.000 | 116  | 96  | 0.449 |
| 377158 | 11 | 93796883  | 93796883  | G                           | C  | SNP | HEPHL1          | ENST00000315765 | 1  | missense                    | c.625           | p.E209Q  | tier1 | 79  | 2 | 0.025 | 137  | 57  | 0.294 |
| 377158 | 11 | 132177495 | 132177495 | A                           | G  | SNP | NTM             | ENST00000539799 | 1  | intronic                    | c.527-88        | e5-88    | tier3 | 74  | 1 | 0.013 | 109  | 68  | 0.384 |
| 377158 | 12 | 2794921   | 2794921   | G                           | A  | SNP | CACNA1C         | ENST00000399634 | 1  | missense                    | c.5806          | p.E1936K | tier1 | 98  | 1 | 0.010 | 194  | 21  | 0.097 |
| 377158 | 12 | 53439709  | 53439709  | C                           | T  | SNP | LOC283335       | ENST00000546566 | -1 | intronic                    | c.NULL          | NULL     | tier3 | 87  | 0 | 0.000 | 176  | 113 | 0.391 |
| 377158 | 14 | 20216351  | 20216351  | C                           | T  | SNP | OR4Q3           | ENST00000331723 | 1  | silent                      | c.765           | p.C255   | tier1 | 27  | 0 | 0.000 | 48   | 32  | 0.400 |
| 377158 | 14 | 38296537  | 38296537  | G                           | A  | SNP | TTC6            | ENST00000478811 | 1  | missense                    | c.1457          | p.G486E  | tier1 | 11  | 0 | 0.000 | 97   | 61  | 0.386 |
| 377158 | 14 | 80328831  | 80328831  | -                           | A  | INS | NRXN3           | ENST00000428277 | 1  | 3_prime_untranslated_region | c.*524          | NULL     | tier4 | 29  | 0 | 0.000 | 69   | 27  | 0.281 |
| 377158 | 14 | 94750258  | 94750258  | A                           | T  | SNP | SERPINA10       | ENST00000261994 | -1 | 3_prime_untranslated_region | c.*44           | NULL     | tier3 | 47  | 1 | 0.021 | 85   | 43  | 0.336 |
| 377158 | 15 | 20362902  | 20362902  | T                           | -  | DEL | BMS1P15         | ENST00000554269 | 1  | intronic                    | c.NULL          | NULL     | tier3 | 376 | 1 | 0.003 | 794  | 289 | 0.267 |
| 377158 | 16 | 67242195  | 67242195  | C                           | T  | SNP | LRRC29          | ENST00000341546 | -1 | intronic                    | c.285+20        | e2+20    | tier3 | 66  | 0 | 0.000 | 90   | 68  | 0.430 |
| 377158 | 17 | 13399610  | 13399610  | G                           | A  | SNP | HS3ST3A1        | ENST00000284110 | -1 | silent                      | c.1125          | p.I375   | tier1 | 157 | 0 | 0.000 | 166  | 134 | 0.447 |
| 377158 | 17 | 37901877  | 37901877  | C                           | A  | SNP | GRB7            | ENST00000445327 | 1  | intronic                    | c.1278+86       | e11+86   | tier3 | 47  | 0 | 0.000 | 103  | 79  | 0.432 |
| 377158 | 17 | 47490642  | 47490642  | A                           | G  | SNP | PHB             | ENST00000300408 | -1 | 5_prime_untranslated_region | c.-16           | NULL     | tier3 | 53  | 0 | 0.000 | 58   | 60  | 0.509 |
| 377158 | 17 | 48653205  | 48653205  | G                           | A  | SNP | CACNA1G         | ENST00000359106 | 1  | missense                    | c.1442          | p.S481N  | tier1 | 397 | 2 | 0.005 | 469  | 348 | 0.425 |
| 377158 | 19 | 12221114  | 12221114  | T                           | C  | SNP | ENSG00000188474 | ENST00000339302 | 1  | splice_region               | c.1-6           | e1-6     | tier3 | 84  | 0 | 0.000 | 132  | 85  | 0.390 |
| 377158 | 19 | 16008165  | 16008165  | G                           | A  | SNP | CYP4F2          | ENST00000221700 | -1 | intronic                    | c.198+59        | e1+59    | tier3 | 66  | 3 | 0.043 | 69   | 61  | 0.459 |
| 377158 | 19 | 33792822  | 33792822  | C                           | A  | SNP | CEBPA           | ENST00000498907 | -1 | nonsense                    | c.499           | p.E167*  | tier1 | 451 | 1 | 0.002 | 795  | 70  | 0.081 |
| 377158 | 20 | 31022403  | 31022425  | CACCACTGCCATAGA<br>GAGGCGGC | -  | DEL | ASXL1           | ENST00000375687 | 1  | frame_shift_del             | c.1888_1910     | p.H633fs | tier1 | 648 | 5 | 0.008 | 1110 | 152 | 0.120 |
| 377158 | 20 | 31022417  | 31022417  | A                           | -  | DEL | ASXL1           | ENST00000375687 | 1  | frame_shift_del             | c.1902          | p.E635fs | tier1 | 641 | 4 | 0.006 | 892  | 115 | 0.114 |
| 377158 | 20 | 33573852  | 33573852  | T                           | C  | SNP | MYH7B           | ENST00000262873 | 1  | intronic                    | c.932-51        | e12-51   | tier3 | 16  | 0 | 0.000 | 22   | 20  | 0.476 |
| 377158 | 21 | 36231773  | 36231773  | C                           | T  | SNP | RUNX1           | ENST00000300305 | -1 | missense                    | c.611           | p.R204Q  | tier1 | 773 | 3 | 0.004 | 951  | 594 | 0.384 |
| 377158 | 21 | 39672197  | 39672197  | T                           | C  | SNP | KCNJ15          | ENST00000328656 | 1  | silent                      | c.1014          | p.D338   | tier1 | 19  | 0 | 0.000 | 39   | 24  | 0.381 |
| 377158 | 21 | 44514777  | 44514777  | T                           | G  | SNP | U2AF1           | ENST00000291552 | -1 | missense                    | c.470           | p.Q157P  | tier1 | 272 | 1 | 0.004 | 448  | 282 | 0.386 |
| 377158 | 21 | 44838927  | 44838927  | G                           | A  | SNP | SIK1            | ENST00000270162 | -1 | missense                    | c.1436          | p.T479I  | tier1 | 46  | 0 | 0.000 | 42   | 36  | 0.462 |
| 377158 | 22 | 34875057  | 34875057  | C                           | T  | SNP | -               | -               | -  | -                           | -               | -        | tier3 | 25  | 0 | 0.000 | 50   | 31  | 0.383 |
| 377158 | 22 | 40425476  | 40425476  | G                           | A  | SNP | FAM83F          | ENST00000333407 | 1  | intronic                    | c.1454-44       | e5-44    | tier3 | 79  | 0 | 0.000 | 95   | 61  | 0.391 |
| 377158 | X  | 54948751  | 54948751  | G                           | A  | SNP | TRO             | ENST00000452830 | 1  | 5_prime_untranslated_region | c.-347          | NULL     | tier3 | 48  | 0 | 0.000 | 84   | 48  | 0.364 |
| 377158 | X  | 62974526  | 62974526  | G                           | A  | SNP | ARHGGEF9        | ENST00000495564 | -1 | rna                         | NULL            | NULL     | tier1 | 168 | 0 | 0.000 | 179  | 93  | 0.341 |
| 377158 | X  | 152826317 | 152826317 | C                           | A  | SNP | ATP2B3          | ENST00000263519 | 1  | missense                    | c.3023          | p.T1008N | tier1 | 385 | 1 | 0.003 | 544  | 223 | 0.290 |
| 378511 | 1  | 38185727  | 38185727  | C                           | T  | SNP | EPHA10          | ENST00000427468 | -1 | missense                    | c.2416          | p.G806S  | tier1 | 311 | 1 | 0.003 | 326  | 208 | 0.389 |
| 378511 | 1  | 103471831 | 103471831 | T                           | A  | SNP | COL11A1         | ENST00000358392 | -1 | missense                    | c.1760          | p.K587I  | tier1 | 151 | 0 | 0.000 | 142  | 72  | 0.335 |
| 378511 | 1  | 151542094 | 151542095 | -                           | TT | INS | TUFT1           | ENST00000538902 | 1  | intronic                    | c.538-39_538-38 | e7-38    | tier3 | 75  | 0 | 0.000 | 85   | 64  | 0.430 |
| 378511 | 1  | 159505705 | 159505705 | G                           | C  | SNP | OR10J5          | ENST00000334857 | -1 | missense                    | c.93            | p.F31L   | tier1 | 77  | 0 | 0.000 | 105  | 33  | 0.239 |
| 378511 | 1  | 215990362 | 215990362 | T                           | C  | SNP | USH2A           | ENST00000366943 | -1 | missense                    | c.9547          | p.I3183V | tier1 | 97  | 0 | 0.000 | 80   | 112 | 0.583 |
| 378511 | 1  | 218458652 | 218458652 | C                           | T  | SNP | RRP15           | ENST00000366932 | 1  | 5_prime_untranslated_region | c.-7            | NULL     | tier2 | 152 | 0 | 0.000 | 210  | 73  | 0.258 |
| 378511 | 2  | 10797867  | 10797867  | C                           | T  | SNP | NOL10           | ENST00000381685 | -1 | splice_site                 | c.906+1         | e11+1    | tier1 | 112 | 1 | 0.009 | 121  | 51  | 0.295 |
| 378511 | 2  | 89246763  | 89246763  | C                           | A  | SNP | IGKV7-3         | ENST00000357453 | -1 | 5_prime_flanking_region     | c.-31869        | NULL     | tier3 | 173 | 1 | 0.006 | 124  | 88  | 0.415 |
| 378511 | 2  | 127805801 | 127805801 | G                           | A  | SNP | BIN1            | ENST00000462958 | -1 | 5_prime_untranslated_region | c.-127805801    | NULL     | tier3 | 130 | 0 | 0.000 | 114  | 86  | 0.430 |
| 378511 | 2  | 191366422 | 191366422 | T                           | A  | SNP | MFSD6           | ENST00000281416 | 1  | 3_prime_untranslated_region | c.*1478         | NULL     | tier3 | 84  | 0 | 0.000 | 103  | 57  | 0.356 |
| 378511 | 4  | 70826715  | 70826715  | G                           | T  | SNP | CSN2            | ENST00000353151 | -1 | 5_prime_untranslated_region | c.-2            | NULL     | tier3 | 100 | 0 | 0.000 | 99   | 60  | 0.377 |
| 378511 | 4  | 85562062  | 85562062  | C                           | T  | SNP | CDS1            | ENST00000295887 | 1  | silent                      | c.951           | p.F317   | tier1 | 93  | 0 | 0.000 | 67   | 51  | 0.432 |
| 378511 | 4  | 100239105 | 100239105 | T                           | G  | SNP | ADH1B           | ENST00000504498 | -1 | rna                         | NULL            | NULL     | tier1 | 74  | 0 | 0.000 | 83   | 41  | 0.331 |
| 378511 | 4  | 150509056 | 150509056 | A                           | G  | SNP | ENSG00000234828 | ENST00000511993 | -1 | intronic                    | c.NULL          | NULL     | tier3 | 94  | 0 | 0.000 | 159  | 80  | 0.335 |
| 378511 | 5  | 134059300 | 134059300 | T                           | C  | SNP | SEC24A          | ENST00000398844 | 1  | missense                    | c.3107          | p.I1036T | tier1 | 236 | 0 | 0.000 | 222  | 119 | 0.347 |
| 378511 | 5  | 140033542 | 140033542 | A                           | G  | SNP | IK              | ENST00000417647 | 1  | missense                    | c.424           | p.K142E  | tier1 | 180 | 0 | 0.000 | 170  | 106 | 0.381 |
| 378511 | 5  | 140719581 | 140719581 | A                           | C  | SNP | PCDHGA2         | ENST00000394576 | 1  | missense                    | c.1043          | p.Y348S  | tier1 | 76  | 0 | 0.000 | 68   | 46  | 0.404 |
| 378511 | 5  | 145616829 | 145616829 | T                           | C  | SNP | RBM27           | ENST00000265271 | 1  | intronic                    | c.1145-32       | e8-32    | tier3 | 92  | 0 | 0.000 | 64   | 44  | 0.407 |
| 378511 | 6  | 23855602  | 23855602  | A                           | G  | SNP | SPTLC1P2        | ENST00000407089 | -1 | 3_prime_flanking_region     | c.*1324         | NULL     | tier3 | 229 | 0 | 0.000 | 215  | 104 | 0.326 |
| 378511 | 6  | 122777603 | 122777603 | T                           | C  | SNP | SERINC1         | ENST00000339697 | -1 | intronic                    | c.371+23        | e3+23    | tier3 | 109 | 1 | 0.009 | 120  | 53  | 0.306 |
| 378511 | 7  | 128291564 | 128291564 | C                           | G  | SNP | ENSG00000243302 | ENST00000465971 | 1  | 3_prime_untranslated_region | c.*128291564    | NULL     | tier3 | 60  | 1 | 0.016 | 35   | 10  | 0.222 |
| 378511 | 8  | 7450151   | 7450151   | A                           | T  | SNP | OR7E157P        | ENST00000494376 | 1  | 3_prime_untranslated_region | c.*7450151      | NULL     | tier2 | 311 | 0 | 0.000 | 442  | 61  | 0.121 |
| 378511 | 8  | 22477862  | 22477862  | T                           | C  | SN  |                 |                 |    |                             |                 |          |       |     |   |       |      |     |       |



|        |    |           |           |    |     |     |                        |                 |    |                             |                 |          |       |     |    |       |     |     |       |
|--------|----|-----------|-----------|----|-----|-----|------------------------|-----------------|----|-----------------------------|-----------------|----------|-------|-----|----|-------|-----|-----|-------|
| 378511 | 11 | 18955245  | 18955245  | C  | A   | SNP | <i>ENSG00000255244</i> | ENST00000528646 | 1  | 5_prime_flanking_region     | c.-1287         | NULL     | tier3 | 146 | 0  | 0.000 | 191 | 21  | 0.099 |
| 378511 | 11 | 20805389  | 20805389  | T  | G   | SNP | <i>NELL1</i>           | ENST00000357134 | 1  | intronic                    | c.335+13        | e3+13    | tier3 | 89  | 0  | 0.000 | 82  | 46  | 0.359 |
| 378511 | 11 | 34186853  | 34186853  | G  | A   | SNP | <i>ABTB2</i>           | ENST00000435224 | -1 | silent                      | c.1806          | p.G602   | tier1 | 52  | 0  | 0.000 | 63  | 18  | 0.222 |
| 378511 | 11 | 66152452  | 66152452  | G  | T   | SNP | <i>NPAS4</i>           | ENST00000311034 | 1  | 5_prime_flanking_region     | c.-36199        | NULL     | tier4 | 42  | 0  | 0.000 | 75  | 53  | 0.414 |
| 378511 | 11 | 71939384  | 71939384  | G  | A   | SNP | <i>INPPL1</i>          | ENST00000298229 | 1  | splice_region               | c.247-8         | e3-8     | tier3 | 83  | 0  | 0.000 | 67  | 38  | 0.362 |
| 378511 | 11 | 72492296  | 72492296  | C  | T   | SNP | <i>STARD10</i>         | ENST00000334805 | -1 | 5_prime_untranslated_region | c.-70           | NULL     | tier2 | 48  | 0  | 0.000 | 46  | 33  | 0.418 |
| 378511 | 11 | 119025065 | 119025065 | T  | C   | SNP | <i>ABCG4</i>           | ENST00000307417 | 1  | missense                    | c.452           | p.M151T  | tier1 | 54  | 0  | 0.000 | 53  | 36  | 0.405 |
| 378511 | 11 | 129739492 | 129739492 | G  | A   | SNP | <i>NFRKB</i>           | ENST00000524794 | -1 | missense                    | c.3503          | p.A1168V | tier1 | 86  | 0  | 0.000 | 61  | 36  | 0.371 |
| 378511 | 12 | 12038950  | 12038951  | -  | T   | INS | <i>ETV6</i>            | ENST00000396373 | 1  | frame_shift_ins             | c.1243_1244     | p.L416fs | tier1 | 647 | 0  | 0.000 | 577 | 264 | 0.314 |
| 378511 | 12 | 52182517  | 52182517  | T  | A   | SNP | <i>SCN8A</i>           | ENST00000354534 | 1  | silent                      | c.4266          | p.A1422  | tier1 | 71  | 0  | 0.000 | 68  | 43  | 0.387 |
| 378511 | 12 | 133768616 | 133768616 | T  | C   | SNP | <i>ZNF268</i>          | ENST00000228289 | 1  | intronic                    | c.457+27        | e4+27    | tier3 | 88  | 0  | 0.000 | 61  | 32  | 0.344 |
| 378511 | 13 | 95361880  | 95361880  | T  | C   | SNP | <i>LINC00391</i>       | ENST00000433569 | -1 | 5_prime_flanking_region     | c.-6764         | NULL     | tier2 | 135 | 2  | 0.015 | 224 | 145 | 0.393 |
| 378511 | 14 | 73587919  | 73587919  | A  | T   | SNP | <i>RBM25</i>           | ENST00000261973 | 1  | 3_prime_untranslated_region | c.*1406         | NULL     | tier3 | 241 | 1  | 0.004 | 385 | 18  | 0.045 |
| 378511 | 15 | 25928387  | 25928387  | G  | A   | SNP | <i>ATP10A</i>          | ENST00000356865 | -1 | intronic                    | c.3492+46       | e17+46   | tier3 | 40  | 0  | 0.000 | 36  | 28  | 0.438 |
| 378511 | 15 | 44090170  | 44090170  | G  | A   | SNP | <i>SERINC4</i>         | ENST00000249714 | -1 | silent                      | c.60            | p.S20    | tier1 | 93  | 0  | 0.000 | 98  | 46  | 0.319 |
| 378511 | 17 | 7910348   | 7910348   | T  | C   | SNP | <i>GUCY2D</i>          | ENST00000254854 | 1  | intronic                    | c.1379-30       | e4-30    | tier3 | 30  | 0  | 0.000 | 29  | 29  | 0.500 |
| 378511 | 17 | 39551774  | 39551774  | A  | G   | SNP | <i>KRT31</i>           | ENST00000251645 | -1 | silent                      | c.690           | p.S230   | tier1 | 114 | 0  | 0.000 | 108 | 43  | 0.285 |
| 378511 | 17 | 59557555  | 59557555  | C  | G   | SNP | <i>TBX4</i>            | ENST00000393853 | 1  | missense                    | c.896           | p.A299G  | tier1 | 75  | 0  | 0.000 | 84  | 48  | 0.364 |
| 378511 | 17 | 65924700  | 65924700  | A  | C   | SNP | <i>BPTF</i>            | ENST00000321892 | 1  | missense                    | c.6359          | p.Q2120P | tier1 | 146 | 3  | 0.020 | 129 | 75  | 0.368 |
| 378511 | 18 | 60999185  | 60999185  | T  | C   | SNP | <i>KDSR</i>            | ENST00000406396 | -1 | intronic                    | c.880-51        | e10-51   | tier3 | 55  | 0  | 0.000 | 44  | 29  | 0.397 |
| 378511 | 18 | 61570598  | 61570598  | G  | T   | SNP | <i>SERPINB2</i>        | ENST00000299502 | 1  | 3_prime_untranslated_region | c.*59           | NULL     | tier3 | 75  | 0  | 0.000 | 86  | 43  | 0.333 |
| 378511 | 19 | 51648220  | 51648220  | G  | A   | SNP | <i>SIGLEC7</i>         | ENST00000317643 | 1  | splice_region               | c.760+4         | e3+4     | tier3 | 63  | 0  | 0.000 | 74  | 38  | 0.336 |
| 378511 | 20 | 11906923  | 11906923  | T  | G   | SNP | <i>BTBD3</i>           | ENST00000378226 | 1  | 3_prime_untranslated_region | c.*2609         | NULL     | tier2 | 96  | 0  | 0.000 | 140 | 68  | 0.325 |
| 378511 | 21 | 44514777  | 44514777  | T  | C   | SNP | <i>U2AF1</i>           | ENST00000291552 | -1 | missense                    | c.470           | p.Q157R  | tier1 | 399 | 1  | 0.003 | 496 | 38  | 0.071 |
| 378511 | 22 | 24401850  | 24401850  | C  | T   | SNP | <i>GSTTP2</i>          | ENST00000466426 | -1 | rna                         | NULL            | NULL     | tier1 | 68  | 0  | 0.000 | 78  | 59  | 0.431 |
| 378511 | 22 | 32162607  | 32162607  | G  | T   | SNP | <i>DEPDC5</i>          | ENST00000266091 | 1  | missense                    | c.316           | p.D106Y  | tier1 | 246 | 1  | 0.004 | 271 | 177 | 0.395 |
| 378511 | X  | 26179440  | 26179440  | C  | T   | SNP | <i>MAGEB6P1</i>        | ENST00000416929 | 1  | 3_prime_untranslated_region | c.*26179440     | NULL     | tier3 | 77  | 0  | 0.000 | 37  | 74  | 0.667 |
| 395344 | 1  | 25611201  | 25611201  | G  | A   | SNP | <i>RHD</i>             | ENST00000328664 | 1  | missense                    | c.286           | p.G96S   | tier1 | 111 | 0  | 0.000 | 72  | 67  | 0.475 |
| 395344 | 1  | 53972518  | 53972518  | C  | A   | SNP | <i>GLIS1</i>           | ENST00000312233 | -1 | intronic                    | c.1706-69       | e8-69    | tier3 | 27  | 0  | 0.000 | 21  | 19  | 0.475 |
| 395344 | 2  | 3652556   | 3652556   | T  | -   | DEL | <i>COLEC11</i>         | ENST00000418971 | 1  | intronic                    | c.172+496       | e2+496   | tier3 | 99  | 0  | 0.000 | 133 | 14  | 0.095 |
| 395344 | 2  | 47748558  | 47748558  | C  | A   | SNP | <i>KCNK12</i>          | ENST00000327876 | -1 | missense                    | c.781           | p.D261Y  | tier1 | 147 | 5  | 0.033 | 93  | 87  | 0.483 |
| 395344 | 2  | 131520055 | 131520055 | C  | T   | SNP | <i>AMER3</i>           | ENST00000321420 | 1  | missense                    | c.410           | p.P137L  | tier1 | 84  | 1  | 0.012 | 56  | 28  | 0.333 |
| 395344 | 2  | 141130704 | 141130704 | T  | A   | SNP | <i>LRP1B</i>           | ENST00000389484 | -1 | missense                    | c.10641         | p.R3547S | tier1 | 378 | 5  | 0.013 | 344 | 254 | 0.424 |
| 395344 | 2  | 167759975 | 167759975 | G  | A   | SNP | <i>XIRP2</i>           | ENST00000409195 | 1  | 5_prime_untranslated_region | c.-18           | NULL     | tier2 | 43  | 0  | 0.000 | 33  | 31  | 0.484 |
| 395344 | 4  | 5990869   | 5990870   | CT | -   | DEL | <i>C4orf50</i>         | ENST00000531445 | -1 | frame_shift_del             | c.630_629       | p.E210fs | tier1 | 74  | 1  | 0.013 | 86  | 15  | 0.149 |
| 395344 | 4  | 134073863 | 134073863 | C  | T   | SNP | <i>PCDH10</i>          | ENST00000264360 | 1  | silent                      | c.2568          | p.I856   | tier1 | 63  | 0  | 0.000 | 52  | 32  | 0.381 |
| 395344 | 5  | 140431040 | 140431040 | G  | A   | SNP | <i>PCDHB1</i>          | ENST00000306549 | 1  | 5_prime_untranslated_region | c.-16           | NULL     | tier3 | 475 | 5  | 0.010 | 418 | 46  | 0.099 |
| 395344 | 5  | 162932633 | 162932633 | C  | T   | SNP | <i>MAT2B</i>           | ENST00000321757 | 1  | 5_prime_untranslated_region | c.-60           | NULL     | tier2 | 265 | 0  | 0.000 | 207 | 12  | 0.055 |
| 395344 | 5  | 176730908 | 176730908 | C  | A   | SNP | <i>PRELID1</i>         | ENST00000502670 | 1  | rna                         | NULL            | NULL     | tier1 | 47  | 0  | 0.000 | 39  | 27  | 0.409 |
| 395344 | 7  | 1056023   | 1056023   | A  | G   | SNP | <i>C7orf50</i>         | ENST00000357429 | -1 | intronic                    | c.130-6244      | e2-6244  | tier4 | 29  | 0  | 0.000 | 30  | 11  | 0.268 |
| 395344 | 7  | 1484979   | 1484979   | G  | C   | SNP | <i>MICALL2</i>         | ENST00000297508 | -1 | missense                    | c.727           | p.P243A  | tier1 | 191 | 1  | 0.005 | 133 | 96  | 0.417 |
| 395344 | 7  | 2598908   | 2598908   | T  | C   | SNP | <i>IQCE</i>            | ENST00000402050 | 1  | intronic                    | c.36+57         | e1+57    | tier2 | 15  | 0  | 0.000 | 7   | 7   | 0.467 |
| 395344 | 8  | 124383531 | 124383531 | C  | T   | SNP | <i>ATAD2</i>           | ENST00000287394 | -1 | missense                    | c.584           | p.R195H  | tier1 | 80  | 0  | 0.000 | 119 | 36  | 0.232 |
| 395344 | 11 | 3041385   | 3041385   | C  | T   | SNP | <i>CARS</i>            | ENST00000380525 | -1 | intronic                    | c.1266+65       | e11+65   | tier3 | 48  | 0  | 0.000 | 39  | 29  | 0.427 |
| 395344 | 11 | 103043939 | 103043939 | C  | A   | SNP | <i>DYNC2H1</i>         | ENST00000398093 | 1  | missense                    | c.5463          | p.D1821E | tier1 | 494 | 4  | 0.008 | 522 | 389 | 0.427 |
| 395344 | 12 | 42866304  | 42866304  | C  | T   | SNP | <i>PRICKLE1</i>        | ENST00000345127 | -1 | missense                    | c.15            | p.M5I    | tier1 | 51  | 1  | 0.019 | 29  | 23  | 0.442 |
| 395344 | 13 | 95095724  | 95095724  | G  | A   | SNP | <i>DCT</i>             | ENST00000446125 | -1 | silent                      | c.1446          | p.D482   | tier1 | 134 | 4  | 0.029 | 113 | 74  | 0.394 |
| 395344 | 13 | 107822358 | 107822358 | G  | T   | SNP | <i>FAM155A</i>         | ENST00000375915 | -1 | 3_prime_untranslated_region | c.*487          | NULL     | tier4 | 164 | 2  | 0.012 | 229 | 19  | 0.077 |
| 395344 | 14 | 59931931  | 59931931  | T  | G   | SNP | <i>GPR135</i>          | ENST00000395116 | -1 | missense                    | c.14            | p.Q5P    | tier1 | 6   | 0  | 0.000 | 1   | 7   | 0.875 |
| 395344 | 14 | 97033430  | 97033431  | -  | A   | INS | <i>PAPOLA</i>          | ENST00000216277 | 1  | 3_prime_untranslated_region | c.*2043         | NULL     | tier3 | 78  | 0  | 0.000 | 101 | 13  | 0.114 |
| 395344 | 16 | 32914951  | 32914951  | C  | A   | SNP | <i>IGHV3OR16-15</i>    | ENST00000565463 | 1  | 3_prime_untranslated_region | c.*32914951     | NULL     | tier3 | 168 | 0  | 0.000 | 125 | 86  | 0.408 |
| 395344 | 19 | 5686425   | 5686425   | A  | -   | DEL | <i>HSD11B1L</i>        | ENST00000423665 | 1  | splice_site_del             | c.205-2         | e3-2     | tier1 | 128 | 0  | 0.000 | 99  | 40  | 0.288 |
| 395344 | 19 | 36216047  | 36216047  | T  | C   | SNP | <i>KMT2B</i>           | ENST00000222270 | 1  | intronic                    | c.3528+59       | e10+59   | tier3 | 58  | 0  | 0.000 | 56  | 28  | 0.333 |
| 395344 | 20 | 31022441  | 31022442  | -  | G   | INS | <i>ASXL1</i>           | ENST00000375687 | 1  | frame_shift_ins             | c.1926_1927     | p.G645fs | tier1 | 677 | 7  | 0.010 | 624 | 294 | 0.320 |
| 395344 | 21 | 36252865  | 36252865  | C  | T   | SNP | <i>RUNX1</i>           | ENST00000300305 | -1 | missense                    | c.497           | p.R166Q  | tier1 | 922 | 3  | 0.003 | 767 | 568 | 0.425 |
| 395344 | 21 | 44524456  | 44524456  | G  | A   | SNP | <i>U2AF1</i>           | ENST00000291552 | -1 | missense                    | c.101           | p.S34F   | tier1 | 456 | 23 | 0.048 | 457 | 297 | 0.393 |
| 395344 | 22 | 19452777  | 19452777  | T  | A   | SNP | <i>UFD1L</i>           | ENST00000263202 | -1 | missense                    | c.443           | p.N148I  | tier1 | 85  | 2  | 0.023 | 86  | 55  | 0.390 |
| 429745 | 1  | 1078202   | 1078202   | A  | SNP | SNP | <i>LOC254099</i>       | ENST00000416774 | 1  | rna                         | NULL            | NULL     | tier1 | 53  | 0  | 0.000 | 62  | 42  | 0.404 |
| 429745 | 1  | 78189035  | 78189035  | T  | C   | SNP | <i>USP33</i>           | ENST00000357428 | -1 | missense                    | c.1463          | p.Q488R  | tier1 | 42  | 0  | 0.000 | 29  | 22  | 0.431 |
| 429745 | 1  | 103400670 | 103400670 | C  | T   | SNP | <i>COL11A1</i>         | ENST00000358392 | -1 | splice_site                 | c.3475-1        | e45-1    | tier1 | 85  | 0  | 0.000 | 172 | 19  | 0.100 |
| 429745 | 1  | 193018974 | 193018974 | G  | T   | SNP | <i>UCHL5</i>           | ENST00000367451 | -1 | missense                    | c.148           | p.H50N   | tier1 | 64  | 0  | 0.000 | 87  | 76  | 0.466 |
| 429745 | 1  | 197021696 | 197021696 | T  | A   | SNP | <i>F13B</i>            | ENST00000367412 | -1 | intronic                    | c.1555+68       | e9+68    | tier3 | 34  | 1  | 0.029 | 37  | 20  | 0.351 |
| 429745 | 1  | 240071866 | 240071866 | C  | T   | SNP | <i>CHRM3</i>           | ENST00000255380 | 1  | missense                    | c.1115          | p.P372L  | tier1 | 16  | 0  | 0.000 | 25  | 20  | 0.444 |
| 429745 | 2  | 152267897 | 152267898 | -  | T   | INS | <i>RIF1</i>            | ENST00000243326 | 1  | intronic                    | c.183+45_183+44 | e2+45    | tier4 | 24  | 0  | 0.000 | 32  | 12  | 0.273 |
| 429745 | 2  | 234231616 | 234231616 | G  | A   | SNP | <i>SAG</i>             | ENST00000409110 | 1  | missense                    | c.400           | p.V134M  | tier1 | 90  | 0  | 0.000 | 105 | 51  | 0.325 |
| 429745 | 3  | 38010850  | 38010850  | G  | T   | SNP | <i>CTDSPL</i>          | ENST00000273179 | 1  | intronic                    | c.426+1477      | e5+1477  | tier3 | 54  | 0  | 0.000 | 99  | 71  | 0.410 |
| 429745 | 3  | 197807179 | 197807179 | C  | T   | SNP | <i>ANKRD18DP</i>       | ENST00000335478 | -1 | splice_region               | c.NULL          | NULL     | tier2 | 24  | 0  | 0.000 | 44  | 22  | 0.333 |
| 429745 | 4  | 146046124 |           |    |     |     |                        |                 |    |                             |                 |          |       |     |    |       |     |     |       |

|        |    |           |           |   |              |     |                        |                 |    |                             |                 |          |       |     |   |       |      |     |       |
|--------|----|-----------|-----------|---|--------------|-----|------------------------|-----------------|----|-----------------------------|-----------------|----------|-------|-----|---|-------|------|-----|-------|
| 429745 | 6  | 32521236  | 32521236  | C | T            | SNP | <i>HLA-DRB6</i>        | ENST00000411500 | -1 | intronic                    | c.NULL          | NULL     | tier3 | 35  | 0 | 0.000 | 74   | 19  | 0.204 |
| 429745 | 6  | 32521237  | 32521237  | A | G            | SNP | <i>HLA-DRB6</i>        | ENST00000411500 | -1 | intronic                    | c.NULL          | NULL     | tier3 | 35  | 0 | 0.000 | 74   | 19  | 0.204 |
| 429745 | 7  | 53854870  | 53854870  | C | T            | SNP | <i>ENSG00000232418</i> | ENST00000426503 | 1  | 3_prime_untranslated_region | c.*53854870     | NULL     | tier2 | 84  | 0 | 0.000 | 86   | 56  | 0.394 |
| 429745 | 7  | 103206001 | 103206002 | - | A            | INS | <i>RELN</i>            | ENST00000424685 | -1 | splice_region_ins           | c.4937-4_4937-3 | e34-3    | tier3 | 19  | 0 | 0.000 | 27   | 13  | 0.325 |
| 429745 | 9  | 114412150 | 114412150 | C | -            | DEL | <i>DNAJC25</i>         | ENST00000313525 | 1  | frame_shift_del             | c.907           | p.H303fs | tier1 | 14  | 0 | 0.000 | 18   | 18  | 0.500 |
| 429745 | 10 | 11376350  | 11376350  | T | G            | SNP | <i>CELF2</i>           | ENST00000450189 | 1  | 3_prime_untranslated_region | c.*5334         | NULL     | tier3 | 41  | 0 | 0.000 | 29   | 22  | 0.431 |
| 429745 | 10 | 35300792  | 35300792  | T | C            | SNP | <i>CUL2</i>            | ENST00000537177 | -1 | missense                    | c.2147          | p.N716S  | tier1 | 56  | 1 | 0.018 | 62   | 62  | 0.500 |
| 429745 | 10 | 111967928 | 111967928 | C | -            | DEL | <i>MXI1</i>            | ENST00000332674 | 1  | intronic                    | c.274+88        | e1+88    | tier2 | 77  | 0 | 0.000 | 180  | 19  | 0.096 |
| 429745 | 11 | 62302518  | 62302518  | C | T            | SNP | <i>AHNAK</i>           | ENST00000378024 | -1 | nonsense                    | c.299           | p.W100*  | tier1 | 50  | 0 | 0.000 | 53   | 26  | 0.329 |
| 429745 | 11 | 65271780  | 65271780  | T | -            | DEL | <i>MALAT1</i>          | ENST00000534336 | 1  | rna                         | NULL            | NULL     | tier1 | 28  | 0 | 0.000 | 22   | 11  | 0.333 |
| 429745 | 11 | 67020214  | 67020214  | G | A            | SNP | <i>KDM2A</i>           | ENST00000529006 | 1  | missense                    | c.2818          | p.A940T  | tier1 | 40  | 1 | 0.024 | 68   | 36  | 0.346 |
| 429745 | 11 | 67565182  | 67565182  | C | T            | SNP | <i>FAM86C2P</i>        | ENST00000528684 | -1 | 5_prime_untranslated_region | c.-67565182     | NULL     | tier3 | 138 | 2 | 0.014 | 149  | 110 | 0.423 |
| 429745 | 12 | 102074329 | 102074329 | G | A            | SNP | <i>MYBPC1</i>          | ENST00000361466 | 1  | intronic                    | c.3433+22       | e29+22   | tier3 | 27  | 0 | 0.000 | 28   | 21  | 0.429 |
| 429745 | 12 | 109569189 | 109569189 | G | T            | SNP | <i>ACACB</i>           | ENST00000539864 | 1  | 5_prime_untranslated_region | c.-8097         | NULL     | tier3 | 38  | 0 | 0.000 | 23   | 21  | 0.477 |
| 429745 | 14 | 31405745  | 31405745  | C | A            | SNP | <i>STRN3</i>           | ENST00000357479 | -1 | missense                    | c.802           | p.G268C  | tier1 | 71  | 0 | 0.000 | 76   | 29  | 0.274 |
| 429745 | 14 | 64921502  | 64921502  | A | G            | SNP | <i>MTHFD1</i>          | ENST00000216605 | 1  | missense                    | c.2627          | p.E876G  | tier1 | 41  | 0 | 0.000 | 95   | 17  | 0.152 |
| 429745 | 14 | 81950742  | 81950742  | C | A            | SNP | <i>SEL1L</i>           | ENST00000336735 | -1 | splice_site                 | c.1874-1        | e19-1    | tier1 | 41  | 0 | 0.000 | 49   | 17  | 0.258 |
| 429745 | 17 | 26817851  | 26817851  | C | T            | SNP | <i>SLC13A2</i>         | ENST00000444914 | 1  | silent                      | c.648           | p.N216   | tier1 | 33  | 1 | 0.029 | 39   | 31  | 0.443 |
| 429745 | 17 | 45913390  | 45913390  | T | A            | SNP | <i>LRRC46</i>          | ENST00000269025 | 1  | splice_region               | c.383-9         | e6-9     | tier3 | 41  | 0 | 0.000 | 60   | 47  | 0.439 |
| 429745 | 17 | 62924761  | 62924761  | A | G            | SNP | <i>ENSG00000264057</i> | ENST00000579873 | 1  | 3_prime_untranslated_region | c.*62924761     | NULL     | tier2 | 52  | 0 | 0.000 | 152  | 20  | 0.116 |
| 429745 | 17 | 65871717  | 65871717  | T | G            | SNP | <i>BPTF</i>            | ENST00000321892 | 1  | missense                    | c.1910          | p.L637R  | tier1 | 27  | 0 | 0.000 | 39   | 25  | 0.391 |
| 429745 | 17 | 74018124  | 74018124  | C | A            | SNP | <i>EVPL</i>            | ENST00000301607 | -1 | intronic                    | c.646-15        | e7-15    | tier2 | 13  | 0 | 0.000 | 22   | 14  | 0.389 |
| 429745 | 18 | 40849590  | 40849590  | A | T            | SNP | <i>SYT4</i>            | ENST00000255224 | -1 | 3_prime_untranslated_region | c.*716          | NULL     | tier3 | 66  | 0 | 0.000 | 82   | 64  | 0.438 |
| 429745 | 19 | 11019894  | 11019894  | C | T            | SNP | <i>CARM1</i>           | ENST00000327064 | 1  | intronic                    | c.558+11        | e4+11    | tier3 | 21  | 0 | 0.000 | 34   | 20  | 0.370 |
| 429745 | 19 | 48643310  | 48643310  | G | C            | SNP | <i>LIG1</i>            | ENST00000263274 | -1 | silent                      | c.1005          | p.L335   | tier1 | 13  | 0 | 0.000 | 41   | 39  | 0.488 |
| 429745 | 20 | 23860305  | 23860305  | C | T            | SNP | <i>CST5</i>            | ENST00000304710 | -1 | nonsense                    | c.9             | p.W3*    | tier1 | 14  | 0 | 0.000 | 12   | 12  | 0.500 |
| 429745 | 21 | 36252919  | 36252920  | - | TAGCATTTCACG | INS | <i>RUNX1</i>           | ENST00000300305 | -1 | frame_shift_ins             | c.443_442       | p.T148fs | tier1 | 681 | 0 | 0.000 | 1118 | 73  | 0.061 |
| 429745 | X  | 39931644  | 39931644  | A | T            | SNP | <i>BCOR</i>            | ENST00000378444 | -1 | nonsense                    | c.2955          | p.Y985*  | tier1 | 320 | 2 | 0.006 | 423  | 313 | 0.424 |
| 430998 | 1  | 24421386  | 24421386  | C | T            | SNP | <i>MYOM3</i>           | ENST00000330966 | -1 | silent                      | c.888           | p.S296   | tier1 | 202 | 1 | 0.005 | 404  | 46  | 0.102 |
| 430998 | 1  | 32162944  | 32162944  | T | C            | SNP | <i>COL16A1</i>         | ENST00000271069 | -1 | intronic                    | c.658-43        | e6-43    | tier4 | 31  | 1 | 0.031 | 32   | 24  | 0.949 |
| 430998 | 2  | 15533730  | 15533730  | G | -            | DEL | <i>NBAS</i>            | ENST00000281513 | -1 | intronic                    | c.3257+621      | e28+621  | tier4 | 105 | 1 | 0.009 | 159  | 18  | 0.102 |
| 430998 | 2  | 42553171  | 42553171  | T | G            | SNP | <i>EML4</i>            | ENST00000318522 | 1  | intronic                    | c.2243-123      | e21-123  | tier3 | 103 | 2 | 0.019 | 106  | 42  | 0.284 |
| 430998 | 2  | 196851848 | 196851848 | T | C            | SNP | <i>DNAH7</i>           | ENST00000312428 | -1 | missense                    | c.1696          | p.I566V  | tier1 | 72  | 3 | 0.040 | 84   | 39  | 0.317 |
| 430998 | 2  | 198266834 | 198266834 | T | C            | SNP | <i>SF3B1</i>           | ENST00000335508 | -1 | missense                    | c.2098          | p.K700E  | tier1 | 274 | 4 | 0.014 | 424  | 268 | 0.386 |
| 430998 | 3  | 46486788  | 46486788  | C | T            | SNP | <i>LTF</i>             | ENST00000231751 | -1 | silent                      | c.1497          | p.T499   | tier1 | 35  | 2 | 0.053 | 51   | 36  | 0.414 |
| 430998 | 3  | 184557400 | 184557400 | G | T            | SNP | <i>VPS8</i>            | ENST00000424463 | 1  | 3_prime_untranslated_region | c.*851          | NULL     | tier3 | 104 | 3 | 0.028 | 102  | 63  | 0.382 |
| 430998 | 4  | 20574880  | 20574880  | A | G            | SNP | <i>SLIT2</i>           | ENST00000273739 | 1  | missense                    | c.3124          | p.K1042E | tier1 | 120 | 0 | 0.000 | 186  | 13  | 0.065 |
| 430998 | 5  | 93217240  | 93217240  | C | T            | SNP | <i>FAM172A</i>         | ENST00000395965 | -1 | missense                    | c.722           | p.R241H  | tier1 | 98  | 0 | 0.000 | 144  | 12  | 0.077 |
| 430998 | 6  | 123786098 | 123786098 | G | A            | SNP | <i>TRDN</i>            | ENST00000398178 | -1 | missense                    | c.884           | p.P295L  | tier1 | 92  | 1 | 0.011 | 145  | 78  | 0.350 |
| 430998 | 8  | 11188922  | 11188922  | T | C            | SNP | <i>SLC35G5</i>         | ENST00000382435 | 1  | missense                    | c.307           | p.W103R  | tier1 | 80  | 0 | 0.000 | 182  | 17  | 0.085 |
| 430998 | 9  | 6534811   | 6534811   | G | A            | SNP | <i>GLDC</i>            | ENST00000321612 | -1 | intronic                    | c.2839-23       | e24-23   | tier3 | 54  | 1 | 0.018 | 62   | 37  | 0.374 |
| 430998 | 10 | 105831879 | 105831879 | C | T            | SNP | <i>COL17A1</i>         | ENST00000353479 | -1 | intronic                    | c.416-42        | e7-42    | tier3 | 30  | 0 | 0.000 | 50   | 38  | 0.432 |
| 430998 | 11 | 89606363  | 89606363  | C | G            | SNP | <i>TRIM64B</i>         | ENST00000329862 | -1 | intronic                    | c.758+73        | e4+73    | tier3 | 686 | 7 | 0.010 | 1004 | 217 | 0.177 |
| 430998 | 12 | 3662052   | 3662052   | C | T            | SNP | <i>PRMT8</i>           | ENST00000543701 | 1  | 3_prime_untranslated_region | c.*3662052      | NULL     | tier3 | 42  | 3 | 0.067 | 70   | 54  | 0.436 |
| 430998 | 12 | 88525006  | 88525006  | A | -            | DEL | <i>CEP290</i>          | ENST00000309041 | -1 | intronic                    | c.442-11        | e6-11    | tier4 | 48  | 0 | 0.000 | 66   | 12  | 0.154 |
| 430998 | 13 | 79894878  | 79894878  | A | -            | DEL | <i>RBM26</i>           | ENST00000438724 | -1 | intronic                    | c.2863-33       | e21-33   | tier4 | 60  | 1 | 0.016 | 81   | 19  | 0.190 |
| 430998 | 14 | 106391086 | 106391086 | C | T            | SNP | <i>KIAA0125</i>        | ENST00000482999 | 1  | rna                         | NULL            | NULL     | tier1 | 151 | 4 | 0.026 | 211  | 183 | 0.463 |
| 430998 | 16 | 1251965   | 1251965   | C | T            | SNP | <i>CACNA1H</i>         | ENST00000348261 | 1  | silent                      | c.1515          | p.R505   | tier1 | 24  | 1 | 0.040 | 44   | 26  | 0.371 |
| 430998 | 16 | 70044642  | 70044642  | G | A            | SNP | <i>PDXDC2P</i>         | ENST00000325845 | -1 | intronic                    | c.NULL          | NULL     | tier3 | 111 | 0 | 0.000 | 186  | 21  | 0.101 |
| 430998 | 17 | 10403963  | 10403963  | G | A            | SNP | <i>MYH1</i>            | ENST00000226207 | -1 | missense                    | c.3845          | p.A1282V | tier1 | 74  | 0 | 0.000 | 198  | 25  | 0.111 |
| 430998 | 17 | 47676686  | 47676686  | T | A            | SNP | <i>SPOP</i>            | ENST00000347630 | -1 | 3_prime_untranslated_region | c.*1054         | NULL     | tier4 | 92  | 0 | 0.000 | 138  | 14  | 0.092 |
| 430998 | 17 | 48267657  | 48267657  | G | A            | SNP | <i>COL1A1</i>          | ENST00000225964 | -1 | intronic                    | c.2451+31       | e35+31   | tier3 | 89  | 2 | 0.022 | 106  | 53  | 0.333 |
| 430998 | 17 | 66146458  | 66146458  | A | G            | SNP | <i>LRRC37A16P</i>      | ENST00000586022 | -1 | 5_prime_untranslated_region | c.-66146458     | NULL     | tier3 | 162 | 6 | 0.036 | 217  | 113 | 0.342 |
| 430998 | 19 | 1806137   | 1806137   | C | T            | SNP | <i>ATP8B3</i>          | ENST00000539485 | -1 | missense                    | c.709           | p.V237M  | tier1 | 30  | 0 | 0.000 | 34   | 22  | 0.393 |
| 430998 | 19 | 12767474  | 12767474  | C | T            | SNP | <i>MAN2B1</i>          | ENST00000593686 | -1 | nonsense                    | c.165           | p.W55*   | tier1 | 95  | 0 | 0.000 | 155  | 13  | 0.077 |
| 430998 | 19 | 22941441  | 22941441  | G | T            | SNP | <i>ZNF99</i>           | ENST00000397104 | -1 | missense                    | c.997           | p.P333T  | tier1 | 144 | 6 | 0.040 | 141  | 80  | 0.362 |
| 430998 | 19 | 54722897  | 54722897  | C | T            | SNP | <i>LILRB3</i>          | ENST00000407860 | -1 | intronic                    | c.1477+101      | e9+101   | tier3 | 69  | 0 | 0.000 | 121  | 16  | 0.116 |
| 430998 | 22 | 40719779  | 40719779  | C | A            | SNP | <i>TNRC6B</i>          | ENST00000454349 | 1  | 3_prime_untranslated_region | c.*534          | NULL     | tier4 | 43  | 0 | 0.000 | 127  | 25  | 0.162 |
| 430998 | 22 | 47075722  | 47075722  | T | C            | SNP | <i>GRAMD4</i>          | ENST00000361034 | 1  | 3_prime_flanking_region     | c.*2574         | NULL     | tier2 | 36  | 2 | 0.053 | 49   | 42  | 0.462 |
| 430998 | X  | 54319632  | 54319632  | C | T            | SNP | <i>WNK3</i>            | ENST00000354646 | -1 | missense                    | c.1822          | p.V608I  | tier1 | 97  | 2 | 0.020 | 43   | 112 | 0.718 |
| 430998 | X  | 134992384 | 134992384 | T | C            | SNP | <i>SAGE1</i>           | ENST00000324447 | 1  | intronic                    | c.1864+55       | e14+55   | tier3 | 21  | 0 | 0.000 | 16   | 59  | 0.776 |
| 435866 | 1  | 98511783  | 98511783  | C | T            | SNP | <i>MIR137HG</i>        | ENST00000424528 | -1 | 5_prime_untranslated_region | c.-98511783     | NULL     | tier4 | 89  | 1 | 0.011 | 243  | 33  | 0.120 |
| 435866 | 2  | 230127480 | 230127480 | C | T            | SNP | <i>PID1</i>            | ENST00000392054 | -1 | silent                      | c.42            | p.S14    | tier1 | 28  | 0 | 0.000 | 75   | 35  | 0.318 |
| 435866 | 3  | 45718805  | 45718805  | C | T            | SNP | <i>LIMD1</i>           | ENST00000273317 | 1  | 3_prime_untranslated_region | c.*254          | NULL     | tier3 | 46  | 2 | 0.042 | 101  | 70  | 0.409 |
| 435866 | 3  | 185978207 | 185978207 | T | C            | SNP | <i>DGKG</i>            | ENST00000265022 | -1 | intronic                    | c.1424+21       | e15+21   | tier3 | 170 | 1 | 0.006 | 230  | 153 | 0.396 |
| 435866 | 4  | 66356333  | 66356333  | G | A            | SNP | <i>EPHA5</i>           | ENST00000273854 | -1 | silent                      | c.1164          | p.D388   | tier1 | 44  | 0 | 0.000 | 115  | 110 | 0.489 |
| 435866 | 5  | 138658293 | 138658293 | A | T            | SNP | <i>MATR3</i>           | ENST00000361059 | 1  | missense                    | c.1785          | p.R595S  | tier1 | 57  | 0 | 0.000 | 112  | 78  | 0.411 |
| 435866 | 5  |           |           |   |              |     |                        |                 |    |                             |                 |          |       |     |   |       |      |     |       |

|        |    |           |           |            |   |     |                        |                 |    |                             |                   |          |       |      |   |       |      |     |       |
|--------|----|-----------|-----------|------------|---|-----|------------------------|-----------------|----|-----------------------------|-------------------|----------|-------|------|---|-------|------|-----|-------|
| 435866 | 8  | 68024182  | 68024182  | G          | A | SNP | <i>CSPP1</i>           | ENST00000389042 | 1  | intronic                    | c.1226-25         | e12-25   | tier3 | 51   | 1 | 0.019 | 109  | 101 | 0.481 |
| 435866 | 8  | 139727925 | 139727925 | C          | A | SNP | <i>COL22A1</i>         | ENST00000303045 | -1 | missense                    | c.2517            | p.K839N  | tier1 | 151  | 1 | 0.007 | 245  | 193 | 0.441 |
| 435866 | 10 | 81921715  | 81921715  | G          | T | SNP | <i>ANXA11</i>          | ENST00000265447 | -1 | silent                      | c.1156            | p.R386   | tier1 | 50   | 0 | 0.000 | 206  | 143 | 0.410 |
| 435866 | 10 | 120810716 | 120810716 | A          | G | SNP | <i>EIF3A</i>           | ENST00000369144 | -1 | missense                    | c.2314            | p.Y772H  | tier1 | 72   | 0 | 0.000 | 154  | 127 | 0.450 |
| 435866 | 12 | 12006446  | 12006447  | CT         | - | DEL | <i>ETV6</i>            | ENST00000396373 | 1  | frame_shift_del             | c.414_415         | p.S139fs | tier1 | 149  | 0 | 0.000 | 366  | 247 | 0.403 |
| 435866 | 14 | 20020000  | 20020000  | C          | T | SNP | <i>POTEM</i>           | ENST00000439503 | -1 | missense                    | c.221             | p.G74E   | tier1 | 263  | 0 | 0.000 | 1591 | 170 | 0.096 |
| 435866 | 15 | 28420657  | 28420657  | C          | T | SNP | <i>HERC2</i>           | ENST00000261609 | -1 | splice_site                 | c.9831+1          | e63+1    | tier1 | 49   | 0 | 0.000 | 311  | 260 | 0.455 |
| 435866 | 16 | 3341019   | 3341019   | C          | T | SNP | <i>ZNF263</i>          | ENST00000219069 | 1  | 3_prime_untranslated_region | c.*461            | NULL     | tier2 | 37   | 0 | 0.000 | 69   | 41  | 0.373 |
| 435866 | 16 | 87870242  | 87870242  | C          | T | SNP | <i>SLC7A5</i>          | ENST00000261622 | -1 | silent                      | c.1152            | p.T384   | tier1 | 40   | 0 | 0.000 | 95   | 90  | 0.487 |
| 435866 | 17 | 18967192  | 18967192  | T          | C | SNP | <i>SNORD3B-1</i>       | ENST00000571722 | -1 | 5_prime_untranslated_region | c.-18967192       | NULL     | tier2 | 161  | 0 | 0.000 | 608  | 148 | 0.195 |
| 435866 | 17 | 40049260  | 40049260  | A          | G | SNP | <i>ACLY</i>            | ENST00000401700 | -1 | intronic                    | c.1763+26         | e15+26   | tier2 | 34   | 0 | 0.000 | 86   | 79  | 0.479 |
| 435866 | 17 | 74732959  | 74732959  | G          | T | SNP | <i>SRSF2</i>           | ENST00000392485 | -1 | missense                    | c.284             | p.P95H   | tier1 | 49   | 2 | 0.039 | 140  | 101 | 0.417 |
| 435866 | 18 | 61226995  | 61226995  | C          | G | SNP | <i>SERPINB12</i>       | ENST00000269491 | 1  | intronic                    | c.384+44          | e3+44    | tier2 | 37   | 0 | 0.000 | 73   | 61  | 0.455 |
| 435866 | 20 | 14830634  | 14830634  | A          | G | SNP | <i>MACROD2</i>         | ENST00000463861 | 1  | 3_prime_untranslated_region | c.*14830634       | NULL     | tier3 | 116  | 0 | 0.000 | 167  | 126 | 0.430 |
| 435866 | 22 | 20715907  | 20715916  | CAGGGCATCG | - | DEL | <i>ENSG00000188280</i> | ENST00000434783 | 1  | intronic                    | c.NULL            | NULL     | tier2 | 70   | 0 | 0.000 | 627  | 79  | 0.112 |
| 435866 | 22 | 38884063  | 38884063  | T          | C | SNP | <i>DDX17</i>           | ENST00000396821 | -1 | missense                    | c.1505            | p.Y502C  | tier1 | 42   | 0 | 0.000 | 85   | 71  | 0.455 |
| 435866 | X  | 79971691  | 79971691  | C          | G | SNP | <i>BRWD3</i>           | ENST00000373275 | -1 | missense                    | c.2290            | p.E764Q  | tier1 | 78   | 0 | 0.000 | 115  | 90  | 0.439 |
| 435866 | X  | 105450024 | 105450024 | C          | T | SNP | <i>MUM1L1</i>          | ENST00000337685 | 1  | missense                    | c.599             | p.S200L  | tier1 | 60   | 2 | 0.032 | 102  | 74  | 0.421 |
| 437422 | 1  | 22186507  | 22186507  | G          | T | SNP | <i>HSPG2</i>           | ENST00000374695 | -1 | intronic                    | c.5015-12         | e41-12   | tier3 | 38   | 0 | 0.000 | 51   | 13  | 0.203 |
| 437422 | 1  | 27736195  | 27736195  | T          | C | SNP | <i>WASF2</i>           | ENST00000430629 | -1 | missense                    | c.1330            | p.I444V  | tier1 | 168  | 0 | 0.000 | 222  | 40  | 0.153 |
| 437422 | 1  | 84641417  | 84641417  | T          | - | DEL | <i>PRKACB</i>          | ENST00000370685 | 1  | intronic                    | c.188-3443        | e2-3443  | tier3 | 58   | 0 | 0.000 | 109  | 14  | 0.114 |
| 437422 | 1  | 145014784 | 145014784 | C          | G | SNP | <i>PDE4DIP</i>         | ENST00000313382 | -1 | intronic                    | c.228+1076        | e3+1076  | tier3 | 75   | 0 | 0.000 | 121  | 19  | 0.136 |
| 437422 | 1  | 167802237 | 167802237 | C          | A | SNP | <i>ADCY10</i>          | ENST00000367851 | -1 | missense                    | c.3581            | p.S1194I | tier1 | 78   | 0 | 0.000 | 102  | 28  | 0.215 |
| 437422 | 1  | 190067860 | 190067860 | C          | T | SNP | <i>BRINP3</i>          | ENST00000367462 | -1 | missense                    | c.1589            | p.R530H  | tier1 | 724  | 4 | 0.006 | 906  | 416 | 0.315 |
| 437422 | 1  | 208061976 | 208061976 | C          | T | SNP | <i>CD34</i>            | ENST00000310833 | -1 | intronic                    | c.972+51          | e7+51    | tier3 | 73   | 3 | 0.040 | 96   | 37  | 0.278 |
| 437422 | 2  | 5838174   | 5838174   | A          | T | SNP | <i>SOX11</i>           | ENST00000322002 | 1  | 3_prime_untranslated_region | c.*3995           | NULL     | tier2 | 118  | 0 | 0.000 | 225  | 17  | 0.070 |
| 437422 | 2  | 75105821  | 75105821  | G          | A | SNP | <i>HK2</i>             | ENST00000290573 | 1  | silent                      | c.1038            | p.K346   | tier1 | 43   | 0 | 0.000 | 60   | 29  | 0.326 |
| 437422 | 2  | 196602340 | 196602340 | C          | T | SNP | <i>SLC39A10</i>        | ENST00000359634 | 1  | 3_prime_untranslated_region | c.*2575           | NULL     | tier3 | 100  | 0 | 0.000 | 189  | 16  | 0.078 |
| 437422 | 3  | 39453515  | 39453515  | A          | G | SNP | <i>RPSA</i>            | ENST00000301821 | 1  | silent                      | c.756             | p.V252   | tier1 | 130  | 1 | 0.008 | 200  | 19  | 0.086 |
| 437422 | 3  | 167006710 | 167006710 | C          | G | SNP | <i>ZBBX</i>            | ENST00000307529 | -1 | missense                    | c.1941            | p.L647F  | tier1 | 118  | 1 | 0.008 | 161  | 75  | 0.314 |
| 437422 | 4  | 120327397 | 120327397 | C          | T | SNP | <i>LOC101926979</i>    | ENST00000508519 | 1  | 5_prime_flanking_region     | c.-48597          | NULL     | tier2 | 126  | 1 | 0.008 | 170  | 22  | 0.115 |
| 437422 | 4  | 166416855 | 166416855 | C          | T | SNP | <i>CPE</i>             | ENST00000402744 | 1  | intronic                    | c.1332+26         | e8+26    | tier3 | 67   | 0 | 0.000 | 118  | 29  | 0.197 |
| 437422 | 5  | 121786643 | 121786643 | C          | G | SNP | <i>SNCAIP</i>          | ENST00000379533 | 1  | missense                    | c.2242            | p.P748A  | tier1 | 36   | 1 | 0.027 | 47   | 18  | 0.277 |
| 437422 | 5  | 133898014 | 133898014 | G          | A | SNP | <i>PHF15</i>           | ENST00000395003 | 1  | missense                    | c.809             | p.G270E  | tier1 | 90   | 0 | 0.000 | 131  | 57  | 0.298 |
| 437422 | 6  | 31239544  | 31239544  | G          | T | SNP | <i>HLA-C</i>           | ENST00000415537 | -1 | missense                    | c.173             | p.A58E   | tier1 | 167  | 2 | 0.012 | 237  | 26  | 0.099 |
| 437422 | 7  | 6193554   | 6193554   | C          | T | SNP | <i>USP42</i>           | ENST00000306177 | 1  | missense                    | c.2369            | p.A790V  | tier1 | 52   | 1 | 0.019 | 65   | 31  | 0.323 |
| 437422 | 7  | 77885784  | 77885784  | C          | T | SNP | <i>MAGI2</i>           | ENST00000354212 | -1 | missense                    | c.1523            | p.R508H  | tier1 | 640  | 2 | 0.003 | 1123 | 56  | 0.047 |
| 437422 | 7  | 120428042 | 120428042 | C          | T | SNP | <i>TSPAN12</i>         | ENST00000222747 | -1 | 3_prime_untranslated_region | c.*604            | NULL     | tier2 | 229  | 1 | 0.004 | 192  | 138 | 0.417 |
| 437422 | 8  | 113299258 | 113299258 | T          | C | SNP | <i>CSMD3</i>           | ENST00000297405 | -1 | intronic                    | c.9331+35         | e58+35   | tier3 | 347  | 2 | 0.006 | 524  | 228 | 0.302 |
| 437422 | 8  | 145754744 | 145754744 | T          | C | SNP | <i>ARHGAP39</i>        | ENST00000377307 | -1 | 3_prime_untranslated_region | c.*1062           | NULL     | tier4 | 60   | 0 | 0.000 | 109  | 52  | 0.321 |
| 437422 | 9  | 114341237 | 114341237 | T          | A | SNP | <i>PTGR1</i>           | ENST00000309195 | -1 | splice_region               | c.496-6           | e6-6     | tier3 | 48   | 0 | 0.000 | 82   | 14  | 0.146 |
| 437422 | 11 | 763314    | 763315    | -          | T | INS | <i>TALDO1</i>          | ENST00000319006 | 1  | intronic                    | c.462-30_462-29   | e5-29    | tier4 | 6    | 0 | 0.000 | 2    | 7   | 0.778 |
| 437422 | 11 | 46686904  | 46686904  | T          | G | SNP | <i>ATG13</i>           | ENST00000312040 | 1  | intronic                    | c.901-29          | e11-29   | tier3 | 77   | 0 | 0.000 | 127  | 58  | 0.312 |
| 437422 | 11 | 130067769 | 130067769 | G          | A | SNP | <i>ST14</i>            | ENST00000278742 | 1  | missense                    | c.1388            | p.R463Q  | tier1 | 26   | 0 | 0.000 | 26   | 18  | 0.409 |
| 437422 | 12 | 122091150 | 122091150 | T          | G | SNP | <i>MORN3</i>           | ENST00000355329 | -1 | missense                    | c.479             | p.Y160S  | tier1 | 116  | 1 | 0.009 | 106  | 42  | 0.284 |
| 437422 | 16 | 10721483  | 10721483  | C          | T | SNP | <i>TEKT5</i>           | ENST00000283025 | -1 | missense                    | c.1415            | p.R472H  | tier1 | 88   | 0 | 0.000 | 95   | 46  | 0.326 |
| 437422 | 17 | 7576851   | 7576851   | A          | C | SNP | <i>TP53</i>            | ENST00000269305 | -1 | splice_site                 | c.993+2           | e8+2     | tier1 | 1059 | 8 | 0.008 | 1443 | 648 | 0.309 |
| 437422 | 17 | 7578431   | 7578431   | G          | A | SNP | <i>TP53</i>            | ENST00000269305 | -1 | nonsense                    | c.499             | p.Q167*  | tier1 | 1051 | 9 | 0.009 | 1349 | 612 | 0.312 |
| 437422 | 17 | 78114602  | 78114603  | -          | T | INS | <i>EIF4A3</i>          | ENST00000269349 | -1 | intronic                    | c.372+515_372+514 | e4+515   | tier4 | 114  | 1 | 0.009 | 190  | 19  | 0.091 |
| 437422 | 18 | 33269094  | 33269094  | G          | A | SNP | <i>GALNT1</i>          | ENST00000269195 | 1  | intronic                    | c.861-43          | e6-43    | tier3 | 191  | 0 | 0.000 | 235  | 88  | 0.272 |
| 437422 | 20 | 9360833   | 9360834   | -          | A | INS | <i>PLCB4</i>           | ENST00000334005 | 1  | intronic                    | c.853+24_853+23   | e10+24   | tier3 | 113  | 1 | 0.009 | 207  | 25  | 0.108 |
| 437422 | 20 | 33068598  | 33068598  | G          | A | SNP | <i>ITCH</i>            | ENST00000262650 | 1  | intronic                    | c.2075+61         | e18+61   | tier3 | 137  | 0 | 0.000 | 202  | 40  | 0.165 |
| 437422 | X  | 31139616  | 31139616  | T          | A | SNP | <i>DMD</i>             | ENST00000357033 | -1 | 3_prime_untranslated_region | c.*420            | NULL     | tier2 | 213  | 0 | 0.000 | 416  | 19  | 0.044 |
| 437422 | X  | 76812922  | 76812922  | C          | T | SNP | <i>ATRX</i>            | ENST00000373344 | -1 | silent                      | c.6699            | p.K2233  | tier1 | 292  | 2 | 0.007 | 485  | 107 | 0.180 |
| 439820 | 1  | 2077399   | 2077399   | C          | G | SNP | <i>PRKCZ</i>           | ENST00000378567 | 1  | intronic                    | c.553-67          | e7-67    | tier3 | 49   | 0 | 0.000 | 106  | 19  | 0.152 |
| 439820 | 1  | 22927251  | 22927251  | G          | C | SNP | <i>EPHA8</i>           | ENST00000166244 | 1  | missense                    | c.2486            | p.W829S  | tier1 | 133  | 0 | 0.000 | 179  | 13  | 0.068 |
| 439820 | 1  | 35250948  | 35250948  | C          | T | SNP | <i>GJB3</i>            | ENST00000373362 | 1  | silent                      | c.585             | p.S195   | tier1 | 203  | 1 | 0.005 | 314  | 79  | 0.200 |
| 439820 | 1  | 91182861  | 91182861  | A          | - | DEL | <i>BARHL2</i>          | ENST00000370445 | -1 | 5_prime_flanking_region     | c.-109            | NULL     | tier2 | 38   | 0 | 0.000 | 72   | 14  | 0.163 |
| 439820 | 1  | 97981408  | 97981408  | G          | A | SNP | <i>DPYD</i>            | ENST00000370192 | -1 | silent                      | c.1614            | p.A538   | tier1 | 96   | 1 | 0.010 | 91   | 71  | 0.438 |
| 439820 | 1  | 115258745 | 115258745 | C          | G | SNP | <i>NRAS</i>            | ENST00000369535 | -1 | missense                    | c.37              | p.G13R   | tier1 | 399  | 0 | 0.000 | 616  | 109 | 0.150 |
| 439820 | 1  | 115258747 | 115258747 | C          | G | SNP | <i>NRAS</i>            | ENST00000369535 | -1 | missense                    | c.35              | p.G12A   | tier1 | 401  | 0 | 0.000 | 694  | 27  | 0.037 |
| 439820 | 1  | 145417057 | 145417057 | C          | G | SNP | <i>HFE2</i>            | ENST00000336751 | 1  | 3_prime_untranslated_region | c.*121            | NULL     | tier3 | 55   | 0 | 0.000 | 70   | 69  | 0.496 |
| 439820 | 1  | 160090882 | 160090882 | C          | T | SNP | <i>ATP1A2</i>          | ENST00000478587 | 1  | 3_prime_untranslated_region | c.*160090882      | NULL     | tier3 | 81   | 0 | 0.000 | 120  | 34  | 0.219 |
| 439820 | 1  | 186089086 | 186089086 | G          | C | SNP | <i>HMCN1</i>           | ENST00000271588 | 1  | intronic                    | c.12095-57        | e80-57   | tier3 | 317  | 0 | 0.000 | 549  | 90  | 0.141 |
| 439820 | 2  | 38295746  | 38295746  | C          | T | SNP | <i>CYP1B1</i>          | ENST00000260630 | -1 | 3_prime_untranslated_region | c.*2119           | NULL     | tier3 | 143  | 2 | 0.014 | 170  | 130 | 0.433 |
| 439820 | 2  | 89292205  | 89292205  | C          | T | SNP | <i>IGKV1-8</i>         | ENST00000495489 | -1 | missense                    | c.68              | p.R23Q   | tier1 | 265  | 0 | 0.000 | 396  | 33  | 0.077 |
| 439820 | 2  | 91927043  | 91927043  | T          | C | SNP | <i>ENSG00000223703</i> | ENST00000445234 | 1  | 3_prime_untranslated_region | c.*919270         |          |       |      |   |       |      |     |       |

|        |    |           |           |     |   |     |                        |                 |    |                             |               |                    |       |     |    |       |      |     |       |
|--------|----|-----------|-----------|-----|---|-----|------------------------|-----------------|----|-----------------------------|---------------|--------------------|-------|-----|----|-------|------|-----|-------|
| 439820 | 3  | 164783108 | 164783108 | G   | A | SNP | <i>SI</i>              | ENST00000264382 | -1 | missense                    | c.748         | p.R250C            | tier1 | 376 | 1  | 0.003 | 620  | 99  | 0.138 |
| 439820 | 3  | 194146027 | 194146027 | A   | G | SNP | <i>ATP13A3</i>         | ENST00000256031 | -1 | intronic                    | c.3313+44     | e28+44             | tier3 | 26  | 2  | 0.071 | 50   | 48  | 0.490 |
| 439820 | 4  | 23796009  | 23796009  | G   | A | SNP | <i>PPARGC1A</i>        | ENST00000264867 | -1 | 3_prime_untranslated_region | c.*1436       | NULL               | tier3 | 39  | 0  | 0.000 | 49   | 17  | 0.258 |
| 439820 | 4  | 159634313 | 159634313 | C   | G | SNP | <i>PPID</i>            | ENST00000307720 | -1 | silent                      | c.852         | p.L284             | tier1 | 99  | 0  | 0.000 | 156  | 13  | 0.077 |
| 439820 | 5  | 40998245  | 40998245  | C   | T | SNP | <i>MROH2B</i>          | ENST00000399564 | -1 | missense                    | c.4667        | p.R1556H           | tier1 | 80  | 0  | 0.000 | 93   | 71  | 0.433 |
| 439820 | 5  | 81583110  | 81583110  | G   | C | SNP | <i>ATP6AP1L</i>        | ENST00000380167 | 1  | intronic                    | c.1+6280      | e0+6280            | tier3 | 113 | 0  | 0.000 | 183  | 15  | 0.075 |
| 439820 | 6  | 131941851 | 131941851 | C   | A | SNP | <i>MED23</i>           | ENST00000368058 | -1 | nonsense                    | c.514         | p.E172*            | tier1 | 100 | 0  | 0.000 | 122  | 96  | 0.440 |
| 439820 | 6  | 146244843 | 146244843 | G   | C | SNP | <i>SHPRH</i>           | ENST00000367503 | -1 | missense                    | c.3508        | p.R1170G           | tier1 | 108 | 0  | 0.000 | 127  | 109 | 0.460 |
| 439820 | 6  | 168466523 | 168466523 | G   | C | SNP | <i>FRMD1</i>           | ENST00000358587 | -1 | 5_prime_untranslated_region | c.-168466523  | NULL               | tier3 | 55  | 0  | 0.000 | 66   | 13  | 0.165 |
| 439820 | 7  | 14217686  | 14217686  | C   | T | SNP | <i>DGKB</i>            | ENST00000258767 | -1 | missense                    | c.2216        | p.R739Q            | tier1 | 64  | 1  | 0.015 | 49   | 34  | 0.410 |
| 439820 | 7  | 92888838  | 92888838  | G   | A | SNP | <i>CCDC132</i>         | ENST00000495039 | 1  | 3_prime_untranslated_region | c.*92888838   | NULL               | tier3 | 76  | 0  | 0.000 | 127  | 102 | 0.444 |
| 439820 | 7  | 102427887 | 102427887 | T   | C | SNP | <i>FAM185A</i>         | ENST00000413034 | 1  | missense                    | c.1037        | p.V346A            | tier1 | 205 | 0  | 0.000 | 296  | 15  | 0.048 |
| 439820 | 7  | 139045095 | 139045095 | T   | G | SNP | <i>LUC7L2</i>          | ENST00000541515 | 1  | intronic                    | c.259+14728   | e2+14728           | tier2 | 150 | 2  | 0.013 | 123  | 16  | 0.114 |
| 439820 | 8  | 2909983   | 2909983   | C   | T | SNP | <i>CSMD1</i>           | ENST00000520002 | -1 | splice_site                 | c.7663+1      | e51+1              | tier1 | 617 | 3  | 0.005 | 501  | 360 | 0.417 |
| 439820 | 8  | 52732287  | 52732287  | C   | T | SNP | <i>PCMTD1</i>          | ENST00000360540 | -1 | 3_prime_untranslated_region | c.*624        | NULL               | tier3 | 120 | 1  | 0.008 | 224  | 21  | 0.085 |
| 439820 | 8  | 102555673 | 102555673 | C   | A | SNP | <i>GRHL2</i>           | ENST00000472106 | 1  | 3_prime_untranslated_region | c.*102555673  | NULL               | tier3 | 51  | 0  | 0.000 | 61   | 42  | 0.408 |
| 439820 | 8  | 133192501 | 133192501 | C   | T | SNP | <i>KCNQ3</i>           | ENST00000388996 | -1 | missense                    | c.680         | p.R227Q            | tier1 | 105 | 0  | 0.000 | 129  | 11  | 0.078 |
| 439820 | 9  | 39178241  | 39178241  | C   | A | SNP | <i>CNTNAP3</i>         | ENST00000297668 | -1 | nonsense                    | c.655         | p.G219*            | tier1 | 212 | 0  | 0.000 | 454  | 130 | 0.222 |
| 439820 | 10 | 5925962   | 5925962   | G   | A | SNP | <i>ANKRD16</i>         | ENST00000380092 | -1 | silent                      | c.657         | p.D219             | tier1 | 45  | 0  | 0.000 | 53   | 35  | 0.398 |
| 439820 | 10 | 30316501  | 30316503  | CTG | - | DEL | <i>KIAA1462</i>        | ENST00000375377 | -1 | in_frame_del                | c.2576_2574   | p.S859in_frame_del | tier1 | 49  | 0  | 0.000 | 67   | 12  | 0.152 |
| 439820 | 10 | 46210670  | 46210670  | G   | C | SNP | <i>FAM21FP</i>         | ENST00000426241 | -1 | 5_prime_untranslated_region | c.-46210670   | NULL               | tier2 | 220 | 0  | 0.000 | 454  | 28  | 0.058 |
| 439820 | 10 | 71627506  | 71627506  | C   | T | SNP | <i>COL13A1</i>         | ENST00000356340 | 1  | intronic                    | c.365-4426    | e3-4426            | tier2 | 49  | 1  | 0.020 | 57   | 36  | 0.387 |
| 439820 | 10 | 105073978 | 105073978 | C   | - | DEL | <i>PCGF6</i>           | ENST00000369847 | -1 | frame_shift_del             | c.961         | p.E321fs           | tier1 | 64  | 1  | 0.015 | 104  | 72  | 0.409 |
| 439820 | 10 | 114925313 | 114925313 | G   | C | SNP | <i>TCF7L2</i>          | ENST00000355995 | 1  | splice_site                 | c.1443-1      | e15-1              | tier1 | 78  | 0  | 0.000 | 96   | 18  | 0.158 |
| 439820 | 11 | 2906566   | 2906566   | C   | A | SNP | <i>CDKN1C</i>          | ENST00000414822 | -1 | nonsense                    | c.154         | p.E52*             | tier1 | 87  | 0  | 0.000 | 96   | 53  | 0.353 |
| 439820 | 11 | 4360536   | 4360536   | C   | G | SNP | <i>OR52B3P</i>         | ENST00000314715 | 1  | 5_prime_flanking_region     | c.-38976      | NULL               | tier3 | 57  | 0  | 0.000 | 120  | 17  | 0.124 |
| 439820 | 11 | 57471814  | 57471814  | G   | A | SNP | <i>MED19</i>           | ENST00000431606 | -1 | missense                    | c.626         | p.P209L            | tier1 | 55  | 3  | 0.052 | 88   | 61  | 0.407 |
| 439820 | 11 | 62364143  | 62364143  | T   | C | SNP | <i>MTA2</i>            | ENST00000278823 | -1 | missense                    | c.848         | p.Y283C            | tier1 | 446 | 9  | 0.020 | 476  | 382 | 0.444 |
| 439820 | 11 | 124413410 | 124413410 | C   | G | SNP | <i>OR8B12</i>          | ENST00000306842 | -1 | silent                      | c.141         | p.L47              | tier1 | 654 | 0  | 0.000 | 1056 | 79  | 0.070 |
| 439820 | 11 | 124789263 | 124789263 | C   | G | SNP | <i>HEPN1</i>           | ENST00000408930 | 1  | 5_prime_untranslated_region | c.-384        | NULL               | tier3 | 80  | 0  | 0.000 | 140  | 23  | 0.141 |
| 439820 | 12 | 6965657   | 6965657   | A   | G | SNP | <i>USP5</i>            | ENST00000229268 | 1  | intronic                    | c.584+43      | e5+43              | tier3 | 18  | 0  | 0.000 | 23   | 21  | 0.477 |
| 439820 | 12 | 47186868  | 47186868  | G   | A | SNP | <i>SLC38A4</i>         | ENST00000266579 | -1 | 5_prime_untranslated_region | c.-14         | NULL               | tier3 | 62  | 0  | 0.000 | 93   | 75  | 0.446 |
| 439820 | 12 | 50026780  | 50026780  | C   | G | SNP | <i>PRPF40B</i>         | ENST00000548825 | 1  | intronic                    | c.349-17      | e7-17              | tier3 | 353 | 4  | 0.010 | 498  | 26  | 0.046 |
| 439820 | 12 | 51844830  | 51844830  | G   | C | SNP | <i>SLC4A8</i>          | ENST00000453097 | 1  | intronic                    | c.277+24      | e3+24              | tier3 | 163 | 0  | 0.000 | 237  | 15  | 0.060 |
| 439820 | 12 | 112888165 | 112888165 | C   | G | SNP | <i>PTPN11</i>          | ENST00000351677 | 1  | missense                    | c.181         | p.D61H             | tier1 | 484 | 0  | 0.000 | 1051 | 46  | 0.042 |
| 439820 | 14 | 24518609  | 24518609  | A   | G | SNP | <i>DHRS4L1</i>         | ENST00000558293 | 1  | intronic                    | c.NULL        | NULL               | tier3 | 114 | 4  | 0.034 | 109  | 104 | 0.488 |
| 439820 | 14 | 24524337  | 24524337  | G   | T | SNP | <i>LRRC16B</i>         | ENST00000342740 | 1  | missense                    | c.523         | p.V175F            | tier1 | 90  | 0  | 0.000 | 72   | 66  | 0.475 |
| 439820 | 14 | 100792064 | 100792064 | A   | G | SNP | <i>SLC25A47</i>        | ENST00000361529 | 1  | intronic                    | c.29-61       | e2-61              | tier3 | 22  | 0  | 0.000 | 32   | 23  | 0.418 |
| 439820 | 15 | 91438809  | 91438809  | G   | C | SNP | <i>FES</i>             | ENST00000328850 | 1  | 3_prime_untranslated_region | c.*21         | NULL               | tier3 | 31  | 1  | 0.031 | 57   | 33  | 0.367 |
| 439820 | 16 | 2098338   | 2098338   | A   | G | SNP | <i>TSC2</i>            | ENST00000219476 | 1  | intronic                    | c.1-250       | e1-250             | tier2 | 98  | 1  | 0.010 | 123  | 88  | 0.417 |
| 439820 | 16 | 7761443   | 7761443   | G   | A | SNP | <i>RBFOX1</i>          | ENST00000547372 | 1  | 3_prime_untranslated_region | c.*1800       | NULL               | tier3 | 101 | 0  | 0.000 | 144  | 28  | 0.159 |
| 439820 | 16 | 24582766  | 24582766  | G   | A | SNP | <i>RBBP6</i>           | ENST00000319715 | 1  | missense                    | c.4379        | p.R1460H           | tier1 | 24  | 0  | 0.000 | 46   | 25  | 0.352 |
| 439820 | 16 | 29576812  | 29576812  | T   | C | SNP | <i>ENSG00000205534</i> | ENST00000447140 | -1 | 5_prime_untranslated_region | c.-29576812   | NULL               | tier3 | 115 | 0  | 0.000 | 143  | 121 | 0.458 |
| 439820 | 16 | 50835415  | 50835415  | A   | G | SNP | <i>CYLD</i>            | ENST00000427738 | 1  | 3_prime_untranslated_region | c.*4996       | NULL               | tier3 | 75  | 1  | 0.013 | 72   | 68  | 0.486 |
| 439820 | 16 | 50835731  | 50835731  | C   | G | SNP | <i>CYLD</i>            | ENST00000427738 | 1  | 3_prime_untranslated_region | c.*5312       | NULL               | tier3 | 66  | 0  | 0.000 | 83   | 52  | 0.382 |
| 439820 | 17 | 7577538   | 7577538   | C   | T | SNP | <i>TP53</i>            | ENST00000269305 | -1 | missense                    | c.743         | p.R248Q            | tier1 | 606 | 5  | 0.008 | 558  | 600 | 0.518 |
| 439820 | 17 | 15942836  | 15942836  | G   | C | SNP | <i>NCOR1</i>           | ENST00000268712 | -1 | missense                    | c.6866        | p.P2289R           | tier1 | 591 | 3  | 0.005 | 690  | 457 | 0.397 |
| 439820 | 18 | 7034550   | 7034550   | A   | G | SNP | <i>LAMA1</i>           | ENST00000389658 | -1 | missense                    | c.1979        | p.M660T            | tier1 | 109 | 0  | 0.000 | 136  | 102 | 0.427 |
| 439820 | 18 | 14752893  | 14752893  | A   | T | SNP | <i>ANKRD30B</i>        | ENST00000358984 | 1  | missense                    | c.392         | p.D131V            | tier1 | 111 | 2  | 0.018 | 161  | 104 | 0.393 |
| 439820 | 18 | 29046556  | 29046556  | G   | C | SNP | <i>DSG3</i>            | ENST00000257189 | 1  | missense                    | c.1475        | p.C492S            | tier1 | 74  | 0  | 0.000 | 127  | 21  | 0.141 |
| 439820 | 18 | 34205430  | 34205430  | G   | A | SNP | <i>FHOD3</i>           | ENST00000257209 | 1  | intronic                    | c.958-44      | e10-44             | tier3 | 104 | 0  | 0.000 | 110  | 55  | 0.331 |
| 439820 | 18 | 42531907  | 42531907  | G   | A | SNP | <i>SETBP1</i>          | ENST00000282030 | 1  | missense                    | c.2602        | p.D868N            | tier1 | 589 | 2  | 0.003 | 768  | 171 | 0.182 |
| 439820 | 19 | 1529504   | 1529504   | G   | T | SNP | <i>PLK5</i>            | ENST00000334770 | 1  | intronic                    | c.490+15      | e5+15              | tier3 | 107 | 0  | 0.000 | 175  | 90  | 0.338 |
| 439820 | 19 | 9007457   | 9007457   | C   | G | SNP | <i>MUC16</i>           | ENST00000397910 | -1 | intronic                    | c.39481+30    | e43+30             | tier3 | 633 | 0  | 0.000 | 1562 | 76  | 0.046 |
| 439820 | 19 | 42401048  | 42401048  | C   | T | SNP | <i>ARHGEF1</i>         | ENST00000337665 | 1  | intronic                    | c.1166+493    | e13+493            | tier4 | 180 | 2  | 0.011 | 111  | 87  | 0.437 |
| 439820 | 19 | 53873937  | 53873938  | -   | A | INS | <i>ZNF525</i>          | ENST00000474037 | 1  | intronic                    | c.1-1531_1530 | e1-1530            | tier3 | 10  | 0  | 0.000 | 24   | 24  | 0.500 |
| 439820 | 20 | 31022441  | 31022442  | -   | G | INS | <i>ASXL1</i>           | ENST00000375687 | 1  | frame_shift_ins             | c.1926_1927   | p.G645fs           | tier1 | 621 | 15 | 0.024 | 758  | 356 | 0.320 |
| 439820 | 20 | 61291782  | 61291782  | G   | C | SNP | <i>SLCO4A1</i>         | ENST00000217159 | 1  | missense                    | c.906         | p.E302D            | tier1 | 70  | 0  | 0.000 | 61   | 14  | 0.187 |
| 439820 | 21 | 44514777  | 44514777  | T   | G | SNP | <i>U2AF1</i>           | ENST00000291552 | -1 | missense                    | c.470         | p.Q157P            | tier1 | 312 | 1  | 0.003 | 308  | 229 | 0.425 |
| 439820 | X  | 31462671  | 31462671  | G   | A | SNP | <i>DMD</i>             | ENST00000357033 | -1 | missense                    | c.9011        | p.T3004I           | tier1 | 92  | 0  | 0.000 | 15   | 128 | 0.895 |
| 439820 | X  | 110439784 | 110439784 | C   | C | SNP | <i>PAK3</i>            | ENST00000360648 | 1  | silent                      | c.1431        | p.P477             | tier1 | 106 | 0  | 0.000 | 176  | 20  | 0.101 |
| 439820 | X  | 128781951 | 128781951 | C   | G | SNP | <i>APLN</i>            | ENST00000427399 | -1 | intronic                    | c.128-57      | e2-57              | tier3 | 48  | 0  | 0.000 | 96   | 17  | 0.150 |
| 439820 | X  | 133511717 | 133511718 | AG  | - | DEL | <i>PHF6</i>            | ENST00000394292 | 1  | frame_shift_del             | c.70_71       | p.D25fs            | tier1 | 178 | 1  | 0.006 | 95   | 352 | 0.788 |
| 476807 | 1  | 26671642  | 26671642  | C   | A | SNP | <i>AIM1L</i>           | ENST00000374207 | -1 | intronic                    | c.169+204     | e2+204             | tier3 | 106 | 0  | 0.000 | 189  | 50  | 0.209 |
| 476807 | 1  | 94342696  | 94342696  | A   | - | DEL | <i>DNTTIP2</i>         | ENST00000436063 | -1 | frame_shift_del             | c.795         | p.F265fs           | tier1 | 31  | 0  | 0.000 | 89   | 39  | 0.305 |
| 476807 | 1  | 176525591 | 176525591 | T   | C | SNP | <i>PAPPA2</i>          | ENST00000367662 | 1  | silent                      | c.133         | p.L45              | tier1 | 88  | 0  | 0.000 | 126  | 32  | 0.203 |
| 476807 | 2  | 97833261  | 97833261  | T   | A | SNP | <i>ANKRD36</i>         | ENST00000420699 | 1  | intronic                    | c.            |                    |       |     |    |       |      |     |       |



|        |    |           |           |                            |           |     |                 |                 |    |                             |              |                     |       |      |    |       |      |     |       |
|--------|----|-----------|-----------|----------------------------|-----------|-----|-----------------|-----------------|----|-----------------------------|--------------|---------------------|-------|------|----|-------|------|-----|-------|
| 476807 | 4  | 126389815 | 126389815 | C                          | G         | SNP | FAT4            | ENST00000394329 | 1  | missense                    | c.12048      | p.D4016E            | tier1 | 126  | 2  | 0.016 | 210  | 104 | 0.329 |
| 476807 | 4  | 183601392 | 183601392 | T                          | C         | SNP | TENM3           | ENST00000406950 | 1  | splice_region               | c.1538-9     | e8-9                | tier3 | 54   | 1  | 0.018 | 105  | 56  | 0.346 |
| 476807 | 5  | 137589102 | 137589102 | G                          | A         | SNP | GFRA3           | ENST00000274721 | -1 | intronic                    | c.1025-38    | e7-38               | tier3 | 151  | 2  | 0.013 | 160  | 64  | 0.286 |
| 476807 | 6  | 32007827  | 32007827  | C                          | A         | SNP | CYP21A2         | ENST00000418967 | 1  | missense                    | c.784        | p.L262I             | tier1 | 64   | 0  | 0.000 | 100  | 52  | 0.342 |
| 476807 | 7  | 75123378  | 75123378  | C                          | A         | SNP | POM121C         | ENST00000453279 | -1 | 5_prime_flanking_region     | c.-52604     | NULL                | tier3 | 268  | 0  | 0.000 | 502  | 23  | 0.044 |
| 476807 | 7  | 77764563  | 77764563  | C                          | T         | SNP | MAGI2           | ENST00000354212 | -1 | intronic                    | c.2846-40    | e17-40              | tier3 | 280  | 5  | 0.018 | 429  | 203 | 0.320 |
| 476807 | 7  | 92764778  | 92764778  | A                          | C         | SNP | SAMD9L          | ENST00000318238 | -1 | missense                    | c.507        | p.D169E             | tier1 | 30   | 0  | 0.000 | 92   | 48  | 0.343 |
| 476807 | 7  | 100684392 | 100684392 | C                          | T         | SNP | MUC17           | ENST00000306151 | 1  | missense                    | c.9695       | p.T3232M            | tier1 | 130  | 0  | 0.000 | 237  | 39  | 0.141 |
| 476807 | 8  | 74529737  | 74529737  | T                          | C         | SNP | STAU2           | ENST00000524300 | -1 | intronic                    | c.411-51     | e4-51               | tier3 | 22   | 0  | 0.000 | 76   | 36  | 0.321 |
| 476807 | 11 | 35016453  | 35016453  | C                          | T         | SNP | PDHX            | ENST00000227868 | 1  | splice_region               | c.1248-8     | e11-8               | tier3 | 73   | 1  | 0.014 | 129  | 79  | 0.380 |
| 476807 | 11 | 93417105  | 93417105  | C                          | T         | SNP | KIAA1731        | ENST00000411936 | 1  | intronic                    | c.950-25     | e8-25               | tier3 | 69   | 0  | 0.000 | 152  | 27  | 0.151 |
| 476807 | 12 | 53670353  | 53670353  | G                          | A         | SNP | ESPL1           | ENST00000257934 | 1  | intronic                    | c.1701-51    | e7-51               | tier3 | 68   | 5  | 0.069 | 87   | 48  | 0.356 |
| 476807 | 12 | 85460596  | 85460596  | A                          | G         | SNP | LRR1Q1          | ENST00000393217 | 1  | missense                    | c.2615       | p.Q872R             | tier1 | 55   | 2  | 0.035 | 248  | 138 | 0.358 |
| 476807 | 12 | 114377861 | 114377861 | G                          | T         | SNP | RBM19           | ENST00000261741 | -1 | silent                      | c.1842       | p.G614              | tier1 | 71   | 4  | 0.053 | 90   | 59  | 0.396 |
| 476807 | 13 | 19407870  | 19407870  | G                          | T         | SNP | ANKRD20A9P      | ENST00000457997 | -1 | 5_prime_untranslated_region | c.-19407870  | NULL                | tier3 | 143  | 0  | 0.000 | 404  | 215 | 0.346 |
| 476807 | 13 | 36347975  | 36347975  | T                          | C         | SNP | DCLK1           | ENST00000360631 | -1 | 3_prime_untranslated_region | c.*697       | NULL                | tier3 | 14   | 0  | 0.000 | 22   | 19  | 0.463 |
| 476807 | 15 | 21071137  | 21071137  | G                          | A         | SNP | POTEB2          | ENST00000454856 | -1 | intronic                    | c.410+64     | e1+64               | tier3 | 780  | 5  | 0.006 | 1530 | 70  | 0.044 |
| 476807 | 15 | 38228468  | 38228468  | A                          | G         | SNP | TMCO5A          | ENST00000319669 | 1  | intronic                    | c.1-47       | e1-47               | tier3 | 45   | 1  | 0.022 | 103  | 63  | 0.375 |
| 476807 | 15 | 87097682  | 87097682  | C                          | T         | SNP | AGBL1           | ENST00000441037 | 1  | missense                    | c.2770       | p.R924W             | tier1 | 61   | 1  | 0.016 | 116  | 30  | 0.206 |
| 476807 | 15 | 90631934  | 90631934  | C                          | T         | SNP | IDH2            | ENST00000330062 | -1 | missense                    | c.419        | p.R140Q             | tier1 | 555  | 6  | 0.011 | 597  | 311 | 0.341 |
| 476807 | 17 | 9066111   | 9066111   | T                          | C         | SNP | NTN1            | ENST00000173229 | 1  | intronic                    | c.1019-19    | e2-19               | tier3 | 80   | 0  | 0.000 | 122  | 51  | 0.295 |
| 476807 | 17 | 74732959  | 74732959  | G                          | T         | SNP | SRSF2           | ENST00000359995 | -1 | missense                    | c.284        | p.P95H              | tier1 | 332  | 1  | 0.003 | 402  | 203 | 0.336 |
| 476807 | 18 | 14513621  | 14513621  | T                          | C         | SNP | POTEC           | ENST00000358970 | -1 | intronic                    | c.1533+40    | e10+40              | tier3 | 102  | 0  | 0.000 | 474  | 32  | 0.063 |
| 476807 | 19 | 8654876   | 8654876   | C                          | T         | SNP | ADAMTS10        | ENST00000270328 | -1 | splice_site                 | c.1798-1     | e14-1               | tier1 | 48   | 1  | 0.020 | 60   | 31  | 0.337 |
| 476807 | 19 | 36321785  | 36321785  | C                          | T         | SNP | NPHS1           | ENST00000378910 | -1 | silent                      | c.3555       | p.P1185             | tier1 | 78   | 0  | 0.000 | 101  | 34  | 0.252 |
| 476807 | 19 | 56303709  | 56303709  | G                          | A         | SNP | NLRP11          | ENST00000443188 | -1 | missense                    | c.2471       | p.T824M             | tier1 | 99   | 1  | 0.010 | 202  | 23  | 0.102 |
| 476807 | 20 | 31022403  | 31022425  | CACCACTGCCATAGA<br>GAGCGGC | -         | DEL | ASXL1           | ENST00000375687 | 1  | frame_shift_del             | c.1888_1910  | p.H633fs            | tier1 | 747  | 3  | 0.004 | 1000 | 114 | 0.102 |
| 476807 | 20 | 31531576  | 31531576  | C                          | T         | SNP | EFCAB8          | ENST00000457731 | 1  | 5_prime_flanking_region     | c.-16075     | NULL                | tier3 | 94   | 0  | 0.000 | 119  | 68  | 0.362 |
| 476807 | 20 | 48914916  | 48914916  | G                          | T         | SNP | LOC284751       | ENST00000371639 | 1  | rna                         | NULL         | NULL                | tier1 | 73   | 1  | 0.014 | 91   | 48  | 0.343 |
| 476807 | 22 | 16157940  | 16157940  | C                          | T         | SNP | ENSG00000206195 | ENST00000413768 | -1 | intronic                    | c.NULL       | NULL                | tier2 | 28   | 0  | 0.000 | 33   | 10  | 0.233 |
| 476807 | X  | 123181343 | 123181344 | -                          | AAGCGAAAG | INS | STAG2           | ENST00000218089 | 1  | frame_shift_ins             | c.807_808    | p.L273fs            | tier1 | 169  | 0  | 0.000 | 281  | 34  | 0.108 |
| 480109 | 1  | 180789156 | 180789156 | A                          | -         | DEL | XPR1            | ENST00000367590 | 1  | intronic                    | c.764-4733   | e8-4733             | tier4 | 48   | 0  | 0.000 | 72   | 14  | 0.163 |
| 480109 | 2  | 55177887  | 55177887  | C                          | T         | SNP | EML6            | ENST00000356458 | 1  | missense                    | c.4184       | p.A1395V            | tier1 | 93   | 0  | 0.000 | 105  | 57  | 0.352 |
| 480109 | 2  | 172951837 | 172951837 | G                          | T         | SNP | DLX1            | ENST00000409492 | 1  | 3_prime_untranslated_region | c.*172951837 | NULL                | tier2 | 32   | 0  | 0.000 | 45   | 18  | 0.286 |
| 480109 | 3  | 3099496   | 3099496   | A                          | -         | DEL | CNTN4           | ENST00000397461 | 1  | 3_prime_untranslated_region | c.*1592      | NULL                | tier2 | 142  | 1  | 0.007 | 195  | 21  | 0.097 |
| 480109 | 4  | 106588612 | 106588612 | T                          | C         | SNP | ARHGEF38        | ENST00000420470 | 1  | missense                    | c.1900       | p.Y634H             | tier1 | 83   | 1  | 0.012 | 71   | 22  | 0.234 |
| 480109 | 4  | 153784943 | 153784943 | A                          | C         | SNP | ARFIP1          | ENST00000353617 | 1  | intronic                    | c.202+77     | e2+77               | tier3 | 84   | 1  | 0.012 | 83   | 49  | 0.371 |
| 480109 | 5  | 38489182  | 38489182  | G                          | T         | SNP | LIFR            | ENST00000263409 | -1 | nonsense                    | c.2333       | p.S778*             | tier1 | 107  | 0  | 0.000 | 95   | 34  | 0.264 |
| 480109 | 5  | 67597268  | 67597268  | G                          | A         | SNP | PIK3R1          | ENST00000396611 | 1  | 3_prime_untranslated_region | c.*3839      | NULL                | tier4 | 81   | 0  | 0.000 | 111  | 12  | 0.098 |
| 480109 | 5  | 118834979 | 118834979 | A                          | G         | SNP | HSD17B4         | ENST00000256216 | 1  | intronic                    | c.973-33     | e13-33              | tier3 | 99   | 0  | 0.000 | 35   | 37  | 0.514 |
| 480109 | 6  | 87969820  | 87969822  | AAG                        | -         | DEL | ZNF292          | ENST00000369577 | 1  | in_frame_del                | c.6473_6475  | p.E2159in_frame_del | tier1 | 55   | 0  | 0.000 | 98   | 26  | 0.210 |
| 480109 | 7  | 36671732  | 36671732  | C                          | A         | SNP | AOAH            | ENST00000258749 | -1 | intronic                    | c.451-20     | e6-20               | tier3 | 95   | 0  | 0.000 | 157  | 13  | 0.077 |
| 480109 | 7  | 116199666 | 116199667 | -                          | G         | INS | CAV1            | ENST00000341049 | 1  | 3_prime_untranslated_region | c.*325       | NULL                | tier3 | 57   | 0  | 0.000 | 59   | 11  | 0.157 |
| 480109 | 9  | 5073770   | 5073770   | G                          | T         | SNP | JAK2            | ENST00000381652 | 1  | missense                    | c.1849       | p.V617F             | tier1 | 568  | 2  | 0.004 | 593  | 251 | 0.297 |
| 480109 | 9  | 125282293 | 125282293 | C                          | T         | SNP | OR1J4           | ENST00000340750 | 1  | silent                      | c.874        | p.L292              | tier1 | 27   | 0  | 0.000 | 58   | 33  | 0.363 |
| 480109 | 11 | 24927450  | 24927450  | G                          | C         | SNP | LUZP2           | ENST00000336930 | 1  | intronic                    | c.397-87     | e6-87               | tier3 | 73   | 0  | 0.000 | 81   | 24  | 0.229 |
| 480109 | 11 | 65655168  | 65655168  | C                          | T         | SNP | FIBP            | ENST00000338369 | -1 | missense                    | c.314        | p.R105Q             | tier1 | 71   | 1  | 0.014 | 138  | 33  | 0.193 |
| 480109 | 11 | 112071453 | 112071453 | A                          | G         | SNP | BCO2            | ENST00000357685 | 1  | missense                    | c.983        | p.Q328R             | tier1 | 100  | 2  | 0.020 | 160  | 74  | 0.316 |
| 480109 | 12 | 6701122   | 6701122   | T                          | C         | SNP | CHD4            | ENST00000309577 | -1 | missense                    | c.3050       | p.K1017R            | tier1 | 384  | 2  | 0.005 | 494  | 174 | 0.260 |
| 480109 | 12 | 40689290  | 40689290  | G                          | C         | SNP | LRRK2           | ENST00000298910 | 1  | missense                    | c.2940       | p.E980D             | tier1 | 78   | 1  | 0.012 | 81   | 22  | 0.212 |
| 480109 | 12 | 122983394 | 122983394 | C                          | T         | SNP | ZCCHC8          | ENST00000336229 | -1 | silent                      | c.222        | p.L74               | tier1 | 83   | 1  | 0.012 | 153  | 67  | 0.305 |
| 480109 | 14 | 21862072  | 21862072  | C                          | T         | SNP | CHD8            | ENST00000399982 | -1 | missense                    | c.5882       | p.R1961H            | tier1 | 28   | 0  | 0.000 | 35   | 22  | 0.386 |
| 480109 | 15 | 85742643  | 85742643  | A                          | G         | SNP | CSPG4P12        | ENST00000559989 | 1  | intronic                    | c.NULL       | NULL                | tier3 | 19   | 1  | 0.050 | 12   | 12  | 0.500 |
| 480109 | 16 | 32956973  | 32956973  | G                          | T         | SNP | ENSG00000260921 | ENST00000568904 | 1  | 5_prime_flanking_region     | c.-49885     | NULL                | tier3 | 280  | 2  | 0.007 | 469  | 84  | 0.152 |
| 480109 | 16 | 57935363  | 57935363  | G                          | C         | SNP | CNGB1           | ENST00000251102 | -1 | intronic                    | c.2893-24    | e28-24              | tier3 | 48   | 0  | 0.000 | 49   | 18  | 0.265 |
| 480109 | 17 | 7577114   | 7577114   | C                          | T         | SNP | TP53            | ENST00000269305 | -1 | missense                    | c.824        | p.C275Y             | tier1 | 621  | 7  | 0.011 | 914  | 468 | 0.338 |
| 480109 | 17 | 16829225  | 16829225  | A                          | C         | SNP | TBC1D27         | ENST00000261651 | -1 | rna                         | NULL         | NULL                | tier1 | 82   | 1  | 0.012 | 120  | 59  | 0.328 |
| 480109 | 19 | 18981487  | 18981487  | T                          | -         | DEL | GDF1            | ENST00000247005 | -1 | intronic                    | c.1-59       | e1-59               | tier2 | 15   | 0  | 0.000 | 69   | 33  | 0.324 |
| 480109 | 20 | 43744353  | 43744353  | G                          | C         | SNP | KCN51           | ENST00000306117 | -1 | 5_prime_flanking_region     | c.-16476     | NULL                | tier3 | 119  | 1  | 0.008 | 117  | 51  | 0.304 |
| 480109 | 21 | 32491425  | 32491425  | T                          | A         | SNP | TIAM1           | ENST00000286827 | -1 | 3_prime_untranslated_region | c.*1261      | NULL                | tier4 | 99   | 0  | 0.000 | 134  | 12  | 0.082 |
| 480109 | 21 | 44010250  | 44010251  | -                          | G         | INS | ENSG00000235772 | ENST00000442605 | -1 | 5_prime_flanking_region     | c.-28206     | NULL                | tier2 | 19   | 0  | 0.000 | 20   | 12  | 0.375 |
| 480109 | 21 | 44010254  | 44010255  | TT                         | -         | DEL | ENSG00000235772 | ENST00000442605 | -1 | 5_prime_flanking_region     | c.-28210     | NULL                | tier2 | 19   | 0  | 0.000 | 17   | 12  | 0.414 |
| 480109 | 21 | 44010258  | 44010259  | -                          | T         | INS | ENSG00000235772 | ENST00000442605 | -1 | 5_prime_flanking_region     | c.-28214     | NULL                | tier2 | 26   | 0  | 0.000 | 19   | 12  | 0.387 |
| 480109 | 22 | 42046726  | 42046726  | G                          | C         | SNP | XRCC6           | ENST00000359308 | 1  | splice_site                 | c.961-1      | e7-1                | tier1 | 112  | 0  | 0.000 | 168  | 91  | 0.351 |
| 480109 | X  | 8538673   | 8538673   | G                          | T         | SNP | KAL1            | ENST00000262648 | -1 | missense                    | c.929        | p.T310N             | tier1 | 55   | 2  | 0.035 | 67   | 36  | 0.350 |
| 480109 | X  | 153042601 | 153042601 | A                          | G         | SNP | PLXNB3          | ENST00000538966 | 1  | intronic                    | c.4997-62    | e29-62              | tier3 | 29   | 0  | 0.000 | 52   | 17  | 0.243 |
| 481668 | 1  | 16262371  | 16262371  | C                          | T         | SNP | SPEN            | ENST00000375759 | 1  | silent                      | c.9636       | p.A3212             | tier1 | 726  | 8  | 0.011 | 901  | 341 | 0.273 |
| 481668 | 1  | 17256868  | 17256868  | G                          | A         | SNP | CROCC           | ENST00000375541 | 1  | intronic                    | c.683+26     | e6+26               | tier3 | 1326 | 12 | 0.009 | 2026 | 325 | 0.138 |
| 481668 | 1  | 467       |           |                            |           |     |                 |                 |    |                             |              |                     |       |      |    |       |      |     |       |

|        |    |           |           |    |   |     |                 |                 |    |                             |                 |          |       |     |    |       |      |     |       |
|--------|----|-----------|-----------|----|---|-----|-----------------|-----------------|----|-----------------------------|-----------------|----------|-------|-----|----|-------|------|-----|-------|
| 481668 | 1  | 247094587 | 247094587 | T  | C | SNP | AHCTF1          | ENST00000366508 | -1 | 5_prime_untranslated_region | c.-59           | NULL     | tier2 | 34  | 0  | 0.000 | 37   | 9   | 0.196 |
| 481668 | 2  | 1457512   | 1457512   | C  | G | SNP | TPO             | ENST00000329066 | 1  | missense                    | c.529           | p.L177V  | tier1 | 111 | 0  | 0.000 | 119  | 36  | 0.232 |
| 481668 | 2  | 61009939  | 61009939  | T  | - | DEL | PAPOLG          | ENST00000238714 | 1  | intronic                    | c.1112+34       | e12+34   | tier3 | 68  | 0  | 0.000 | 131  | 17  | 0.115 |
| 481668 | 2  | 98853198  | 98853198  | A  | G | SNP | VWA3B           | ENST00000485216 | 1  | rna                         | NULL            | NULL     | tier1 | 69  | 2  | 0.028 | 81   | 31  | 0.277 |
| 481668 | 4  | 15070967  | 15070968  | -  | A | INS | CPEB2           | ENST00000538197 | 1  | 3_prime_untranslated_region | c.*2963         | NULL     | tier2 | 104 | 2  | 0.019 | 179  | 57  | 0.242 |
| 481668 | 4  | 95223388  | 95223388  | A  | G | SNP | HPGDS           | ENST00000295256 | -1 | missense                    | c.344           | p.M115T  | tier1 | 94  | 1  | 0.011 | 146  | 46  | 0.240 |
| 481668 | 5  | 40959580  | 40959580  | T  | C | SNP | C7              | ENST00000313164 | 1  | missense                    | c.1519          | p.S507P  | tier1 | 92  | 4  | 0.042 | 130  | 47  | 0.266 |
| 481668 | 5  | 41862863  | 41862863  | A  | - | DEL | OXCT1           | ENST00000196371 | -1 | intronic                    | c.79-11         | e2-11    | tier4 | 93  | 0  | 0.000 | 135  | 19  | 0.123 |
| 481668 | 6  | 325150    | 325150    | T  | C | SNP | DUSP22          | ENST00000419235 | 1  | intronic                    | c.139-9964      | e4-9964  | tier3 | 459 | 16 | 0.034 | 630  | 84  | 0.117 |
| 481668 | 6  | 31760727  | 31760727  | G  | C | SNP | VARS            | ENST00000495010 | -1 | 5_prime_untranslated_region | c.-31760727     | NULL     | tier3 | 96  | 2  | 0.020 | 117  | 46  | 0.281 |
| 481668 | 6  | 135513482 | 135513482 | A  | G | SNP | MYB             | ENST00000341911 | 1  | missense                    | c.548           | p.N183S  | tier1 | 122 | 0  | 0.000 | 131  | 47  | 0.264 |
| 481668 | 7  | 34118627  | 34118627  | C  | T | SNP | BMPER           | ENST00000297161 | 1  | missense                    | c.1237          | p.R413C  | tier1 | 738 | 0  | 0.000 | 1026 | 53  | 0.049 |
| 481668 | 7  | 81593304  | 81593304  | T  | G | SNP | CACNA2D1        | ENST00000356253 | -1 | intronic                    | c.2816+68       | e34+68   | tier3 | 51  | 0  | 0.000 | 46   | 26  | 0.361 |
| 481668 | 7  | 100635373 | 100635373 | C  | A | SNP | MUC12           | ENST00000536621 | 1  | missense                    | c.1529          | p.A510D  | tier1 | 285 | 1  | 0.004 | 519  | 68  | 0.116 |
| 481668 | 7  | 148506166 | 148506166 | T  | A | SNP | EZH2            | ENST00000320356 | -1 | missense                    | c.2192          | p.Y731F  | tier1 | 440 | 1  | 0.002 | 646  | 222 | 0.255 |
| 481668 | 9  | 117138957 | 117138957 | C  | T | SNP | AKNA            | ENST00000307564 | -1 | missense                    | c.1130          | p.R377H  | tier1 | 350 | 0  | 0.000 | 729  | 24  | 0.032 |
| 481668 | 10 | 128933807 | 128933807 | T  | C | SNP | FAM196A         | ENST00000522781 | -1 | 3_prime_untranslated_region | c.*2294         | NULL     | tier3 | 167 | 0  | 0.000 | 214  | 75  | 0.259 |
| 481668 | 10 | 133761131 | 133761131 | G  | T | SNP | PPP2R2D         | ENST00000455566 | 1  | missense                    | c.825           | p.M275I  | tier1 | 148 | 1  | 0.007 | 213  | 57  | 0.211 |
| 481668 | 11 | 71903432  | 71903432  | A  | G | SNP | FOLR1           | ENST00000312293 | 1  | intronic                    | c.168+47        | e1+47    | tier3 | 63  | 0  | 0.000 | 70   | 26  | 0.271 |
| 481668 | 12 | 21608977  | 21608977  | G  | T | SNP | PYROXD1         | ENST00000240651 | 1  | missense                    | c.698           | p.S233I  | tier1 | 91  | 2  | 0.022 | 141  | 54  | 0.277 |
| 481668 | 12 | 57929244  | 57929245  | AC | - | DEL | DCTN2           | ENST00000551142 | -1 | 5_prime_untranslated_region | c.-57929244     | NULL     | tier3 | 91  | 0  | 0.000 | 137  | 17  | 0.110 |
| 481668 | 12 | 113599210 | 113599210 | C  | A | SNP | DDX54           | ENST00000549271 | -1 | rna                         | NULL            | NULL     | tier1 | 109 | 0  | 0.000 | 122  | 26  | 0.176 |
| 481668 | 13 | 33223009  | 33223009  | C  | T | SNP | PDS5B           | ENST00000315596 | 1  | nonsense                    | c.100           | p.R34*   | tier1 | 77  | 1  | 0.013 | 130  | 64  | 0.327 |
| 481668 | 14 | 50895475  | 50895476  | -  | A | INS | MAP4K5          | ENST00000013125 | -1 | splice_region_ins           | c.2234-4_2234-3 | e28-3    | tier3 | 69  | 0  | 0.000 | 144  | 16  | 0.100 |
| 481668 | 15 | 56704519  | 56704519  | G  | A | SNP | TEX9            | ENST00000352903 | 1  | missense                    | c.848           | p.R283K  | tier1 | 167 | 0  | 0.000 | 216  | 98  | 0.312 |
| 481668 | 15 | 74889854  | 74889855  | AC | - | DEL | ARID3B          | ENST00000346246 | 1  | 3_prime_untranslated_region | c.*1739         | NULL     | tier4 | 53  | 0  | 0.000 | 67   | 11  | 0.141 |
| 481668 | 16 | 30456662  | 30456662  | C  | T | SNP | SEPHS2          | ENST00000542752 | -1 | silent                      | c.216           | p.G72    | tier1 | 82  | 0  | 0.000 | 84   | 23  | 0.215 |
| 481668 | 17 | 1559855   | 1559855   | T  | C | SNP | PRPF8           | ENST00000304992 | -1 | missense                    | c.5624          | p.H1875R | tier1 | 651 | 6  | 0.009 | 997  | 410 | 0.290 |
| 481668 | 17 | 37425012  | 37425012  | A  | G | SNP | FBXL20          | ENST00000264658 | -1 | intronic                    | c.933+68        | e12+68   | tier3 | 63  | 2  | 0.031 | 86   | 46  | 0.349 |
| 481668 | 17 | 37879957  | 37879957  | C  | T | SNP | ERBB2           | ENST00000269571 | 1  | intronic                    | c.2208+44       | e18+44   | tier3 | 41  | 0  | 0.000 | 31   | 22  | 0.400 |
| 481668 | 19 | 9067438   | 9067438   | C  | T | SNP | MUC16           | ENST00000397910 | -1 | missense                    | c.20008         | p.V6670I | tier1 | 906 | 9  | 0.010 | 1848 | 610 | 0.247 |
| 481668 | 19 | 15219913  | 15219913  | C  | G | SNP | SYDE1           | ENST00000342784 | 1  | silent                      | c.135           | p.P45    | tier1 | 38  | 1  | 0.026 | 30   | 28  | 0.483 |
| 481668 | 20 | 2552803   | 2552803   | T  | - | DEL | TMC2            | ENST00000358864 | 1  | intronic                    | c.555-22        | e5-22    | tier3 | 100 | 2  | 0.020 | 167  | 26  | 0.135 |
| 481668 | 20 | 2552806   | 2552806   | T  | A | SNP | TMC2            | ENST00000358864 | 1  | intronic                    | c.555-19        | e5-19    | tier3 | 103 | 2  | 0.019 | 165  | 28  | 0.144 |
| 485523 | 1  | 110009655 | 110009655 | C  | - | DEL | SYPL2           | ENST00000369872 | 1  | intronic                    | c.55-26         | e2-26    | tier2 | 10  | 0  | 0.000 | 8    | 13  | 0.619 |
| 485523 | 4  | 39474726  | 39474726  | G  | A | SNP | LIAS            | ENST00000261434 | 1  | missense                    | c.961           | p.E321K  | tier1 | 148 | 0  | 0.000 | 242  | 17  | 0.066 |
| 485523 | 4  | 55976980  | 55976980  | G  | A | SNP | KDR             | ENST00000263923 | -1 | intronic                    | c.977-45        | e8-45    | tier3 | 266 | 0  | 0.000 | 310  | 23  | 0.069 |
| 485523 | 5  | 23527469  | 23527469  | C  | A | SNP | PRDM9           | ENST00000296682 | 1  | missense                    | c.2272          | p.R758S  | tier1 | 165 | 2  | 0.012 | 207  | 18  | 0.080 |
| 485523 | 5  | 54552381  | 54552381  | A  | - | DEL | DHX29           | ENST00000251636 | -1 | intronic                    | c.4058-13       | e27-13   | tier3 | 78  | 0  | 0.000 | 79   | 10  | 0.112 |
| 485523 | 5  | 176939370 | 176939370 | C  | T | SNP | DDX41           | ENST00000507955 | -1 | missense                    | c.1574          | p.R525H  | tier1 | 524 | 0  | 0.000 | 677  | 65  | 0.088 |
| 485523 | 6  | 73904728  | 73904728  | A  | T | SNP | KCNQ5           | ENST00000402622 | 1  | missense                    | c.2420          | p.N807I  | tier1 | 82  | 0  | 0.000 | 156  | 18  | 0.103 |
| 485523 | 9  | 15472612  | 15472612  | A  | - | DEL | PSIP1           | ENST00000495873 | -1 | rna                         | NULL            | NULL     | tier1 | 82  | 0  | 0.000 | 95   | 12  | 0.112 |
| 485523 | 14 | 24517447  | 24517447  | G  | A | SNP | DHRS4L1         | ENST00000558293 | 1  | rna                         | NULL            | NULL     | tier1 | 152 | 0  | 0.000 | 248  | 20  | 0.074 |
| 485523 | 15 | 75706652  | 75706652  | C  | T | SNP | SIN3A           | ENST00000360439 | -1 | missense                    | c.367           | p.V123M  | tier1 | 46  | 0  | 0.000 | 39   | 10  | 0.204 |
| 485523 | 18 | 47462642  | 47462642  | G  | A | SNP | MYO5B           | ENST00000285039 | -1 | silent                      | c.1983          | p.N661   | tier1 | 350 | 0  | 0.000 | 555  | 54  | 0.089 |
| 485523 | 19 | 7805616   | 7805616   | G  | C | SNP | CD209           | ENST00000315599 | -1 | 3_prime_untranslated_region | c.*2309         | NULL     | tier3 | 497 | 0  | 0.000 | 835  | 27  | 0.031 |
| 489196 | 1  | 1871145   | 1871145   | G  | A | SNP | C1orf222        | ENST00000493964 | -1 | missense                    | c.614           | p.P205L  | tier1 | 103 | 0  | 0.000 | 48   | 51  | 0.515 |
| 489196 | 1  | 116386058 | 116386058 | C  | T | SNP | NHLH2           | ENST00000369506 | -1 | 5_prime_untranslated_region | c.-5065         | NULL     | tier4 | 134 | 0  | 0.000 | 218  | 78  | 0.262 |
| 489196 | 1  | 248651829 | 248651829 | A  | T | SNP | OR2G6           | ENST00000343414 | 1  | 5_prime_flanking_region     | c.-33119        | NULL     | tier3 | 230 | 1  | 0.004 | 253  | 52  | 0.171 |
| 489196 | 2  | 172930961 | 172930961 | A  | G | SNP | METAP1D         | ENST00000315796 | 1  | intronic                    | c.498-31        | e5-31    | tier3 | 37  | 1  | 0.026 | 62   | 34  | 0.354 |
| 489196 | 2  | 178483636 | 178483636 | C  | T | SNP | TTA30A          | ENST00000355689 | -1 | 5_prime_untranslated_region | c.-207          | NULL     | tier2 | 102 | 0  | 0.000 | 104  | 37  | 0.262 |
| 489196 | 2  | 196863801 | 196863801 | G  | T | SNP | DNAH7           | ENST00000410072 | -1 | 3_prime_untranslated_region | c.*13           | NULL     | tier4 | 90  | 0  | 0.000 | 106  | 29  | 0.215 |
| 489196 | 2  | 219501054 | 219501054 | C  | T | SNP | PLCD4           | ENST00000417849 | 1  | silent                      | c.2121          | p.D707   | tier1 | 100 | 0  | 0.000 | 95   | 36  | 0.275 |
| 489196 | 2  | 233407276 | 233407276 | C  | T | SNP | CHRNA7          | ENST00000389494 | 1  | intronic                    | c.604+46        | e6+46    | tier3 | 32  | 0  | 0.000 | 26   | 18  | 0.409 |
| 489196 | 2  | 234591299 | 234591299 | T  | C | SNP | UGT1A7          | ENST00000373426 | 1  | missense                    | c.716           | p.V239A  | tier1 | 117 | 1  | 0.008 | 159  | 19  | 0.107 |
| 489196 | 3  | 77607305  | 77607305  | G  | A | SNP | ROBO2           | ENST00000461745 | 1  | splice_region               | c.1437+5        | e9+5     | tier3 | 44  | 0  | 0.000 | 57   | 27  | 0.321 |
| 489196 | 3  | 113327118 | 113327118 | G  | T | SNP | SIDT1           | ENST00000393830 | 1  | intronic                    | c.1602+54       | e16+54   | tier3 | 67  | 0  | 0.000 | 49   | 22  | 0.310 |
| 489196 | 4  | 190876351 | 190876351 | G  | C | SNP | FRG1            | ENST00000226798 | 1  | intronic                    | c.432+45        | e5+45    | tier3 | 169 | 2  | 0.012 | 329  | 26  | 0.073 |
| 489196 | 5  | 32135733  | 32135733  | A  | G | SNP | GOLPH3          | ENST00000265070 | -1 | silent                      | c.417           | p.H139   | tier1 | 117 | 0  | 0.000 | 248  | 39  | 0.135 |
| 489196 | 5  | 122713937 | 122713937 | G  | A | SNP | CEP120          | ENST00000306467 | -1 | intronic                    | c.2196+93       | e15+93   | tier4 | 93  | 0  | 0.000 | 163  | 28  | 0.147 |
| 489196 | 5  | 140768657 | 140768657 | A  | T | SNP | PCDHGB4         | ENST00000519479 | 1  | missense                    | c.1206          | p.L402F  | tier1 | 82  | 1  | 0.012 | 79   | 48  | 0.378 |
| 489196 | 6  | 2623069   | 2623069   | C  | T | SNP | C6orf195        | ENST00000296847 | -1 | 3_prime_untranslated_region | c.*604          | NULL     | tier3 | 142 | 0  | 0.000 | 124  | 66  | 0.347 |
| 489196 | 6  | 30954600  | 30954600  | A  | C | SNP | MUC21           | ENST00000376296 | 1  | missense                    | c.648           | p.R216S  | tier1 | 172 | 5  | 0.028 | 213  | 34  | 0.136 |
| 489196 | 6  | 35761203  | 35761203  | A  | - | DEL | CLPSL1          | ENST00000428710 | 1  | intronic                    | c.82-62         | e2-62    | tier4 | 63  | 1  | 0.016 | 55   | 12  | 0.179 |
| 489196 | 6  | 36685089  | 36685089  | G  | A | SNP | RAB44           | ENST00000229824 | 1  | missense                    | c.215           | p.R72K   | tier1 | 124 | 1  | 0.008 | 98   | 40  | 0.290 |
| 489196 | 6  | 62611335  | 62611335  | A  | - | DEL | KHDRBS2         | ENST00000281156 | -1 | intronic                    | c.484-59        | e5-59    | tier3 | 29  | 0  | 0.000 | 43   | 13  | 0.232 |
| 489196 | 6  | 112671088 | 112671088 | G  | T | SNP | RFPL4B          | ENST00000441065 | 1  | missense                    | c.178           | p.A60S   | tier1 | 99  | 0  | 0.000 | 77   | 36  | 0.319 |
| 489196 | 6  | 143094282 | 143094282 | C  | T | SNP | HIVEP2          | ENST00000012134 | -1 | missense                    | c.1594          | p.E532K  | tier1 | 142 | 0  | 0.000 | 143  | 45  | 0.239 |
| 489196 | 7  | 23625386  | 23625386  | G  | A | SNP | ENSG00000232553 | ENST00000416636 | -1 | 5_prime_untranslated_region | c.-23625386     | NULL     |       |     |    |       |      |     |       |

|        |    |           |           |   |     |     |                        |                 |    |                             |              |          |       |     |    |       |      |     |       |
|--------|----|-----------|-----------|---|-----|-----|------------------------|-----------------|----|-----------------------------|--------------|----------|-------|-----|----|-------|------|-----|-------|
| 489196 | 8  | 87519260  | 87519260  | T | C   | SNP | <i>RMDN1</i>           | ENST00000406452 | -1 | missense                    | c.211        | p.I71V   | tier1 | 169 | 0  | 0.000 | 275  | 99  | 0.264 |
| 489196 | 8  | 126011647 | 126011647 | T | C   | SNP | <i>SQLI</i>            | ENST00000265896 | 1  | missense                    | c.2          | p.M1T    | tier1 | 79  | 0  | 0.000 | 80   | 28  | 0.259 |
| 489196 | 9  | 127300323 | 127300323 | G | C   | SNP | <i>NR6A1</i>           | ENST00000487099 | -1 | intronic                    | c.824+48     | e6+48    | tier3 | 58  | 2  | 0.033 | 38   | 23  | 0.377 |
| 489196 | 10 | 23326305  | 23326305  | G | A   | SNP | <i>ARMC3</i>           | ENST00000298032 | 1  | missense                    | c.2516       | p.G839E  | tier1 | 139 | 0  | 0.000 | 98   | 49  | 0.333 |
| 489196 | 10 | 79797037  | 79797037  | A | G   | SNP | <i>RPS24</i>           | ENST00000440692 | 1  | missense                    | c.365        | p.K122R  | tier1 | 68  | 0  | 0.000 | 73   | 27  | 0.270 |
| 489196 | 11 | 20676288  | 20676288  | G | A   | SNP | <i>SLC6A5</i>          | ENST00000525748 | 1  | silent                      | c.2268       | p.P756   | tier1 | 128 | 0  | 0.000 | 118  | 47  | 0.285 |
| 489196 | 11 | 46400551  | 46400551  | T | A   | SNP | <i>DGKZ</i>            | ENST00000454345 | 1  | missense                    | c.2993       | p.L998Q  | tier1 | 19  | 0  | 0.000 | 24   | 18  | 0.429 |
| 489196 | 11 | 48454279  | 48454279  | G | A   | SNP | <i>OR4C10P</i>         | ENST00000434991 | -1 | 5_prime_untranslated_region | c.-48454279  | NULL     | tier3 | 238 | 0  | 0.000 | 205  | 87  | 0.298 |
| 489196 | 11 | 56000330  | 56000330  | C | T   | SNP | <i>OR5T2</i>           | ENST00000313264 | -1 | missense                    | c.332        | p.C111Y  | tier1 | 33  | 0  | 0.000 | 72   | 29  | 0.287 |
| 489196 | 12 | 9007449   | 9007449   | T | C   | SNP | <i>A2ML1</i>           | ENST00000299698 | 1  | intronic                    | c.2764+22    | e22+22   | tier3 | 176 | 0  | 0.000 | 162  | 56  | 0.257 |
| 489196 | 12 | 52946663  | 52946663  | C | T   | SNP | <i>KRT71</i>           | ENST00000267119 | -1 | missense                    | c.199        | p.G67R   | tier1 | 225 | 1  | 0.004 | 202  | 82  | 0.289 |
| 489196 | 12 | 54686621  | 54686621  | C | T   | SNP | <i>NFE2</i>            | ENST00000312156 | -1 | missense                    | c.659        | p.G220E  | tier1 | 76  | 0  | 0.000 | 87   | 29  | 0.250 |
| 489196 | 12 | 56110725  | 56110725  | A | G   | SNP | <i>BLOC1S1</i>         | ENST00000548925 | 1  | missense                    | c.154        | p.R52G   | tier1 | 116 | 0  | 0.000 | 107  | 42  | 0.282 |
| 489196 | 12 | 76461257  | 76461257  | - | A   | INS | <i>NAP1L1</i>          | ENST00000551524 | -1 | 5_prime_untranslated_region | c.-24        | NULL     | tier3 | 18  | 0  | 0.000 | 33   | 17  | 0.340 |
| 489196 | 13 | 28009534  | 28009534  | T | C   | SNP | <i>GTF3A</i>           | ENST00000419181 | 1  | intronic                    | c.567-36     | e6-36    | tier3 | 31  | 0  | 0.000 | 57   | 22  | 0.279 |
| 489196 | 13 | 52863939  | 52863939  | A | G   | SNP | <i>LOC101930578</i>    | ENST00000451298 | -1 | intronic                    | NULL         | NULL     | tier3 | 306 | 3  | 0.010 | 435  | 26  | 0.056 |
| 489196 | 14 | 59670661  | 59670661  | G | T   | SNP | <i>DAAM1</i>           | ENST00000351081 | 1  | intronic                    | c.1+15175    | e0+15175 | tier3 | 58  | 0  | 0.000 | 121  | 37  | 0.234 |
| 489196 | 14 | 106945697 | 106945697 | G | A   | SNP | <i>LINC00221</i>       | ENST00000334298 | 1  | intronic                    | c.NULL       | NULL     | tier3 | 62  | 1  | 0.016 | 42   | 24  | 0.364 |
| 489196 | 15 | 20457242  | 20457242  | C | T   | SNP | <i>ENSG00000258628</i> | ENST00000557586 | -1 | 5_prime_untranslated_region | c.-20457242  | NULL     | tier3 | 615 | 3  | 0.005 | 691  | 51  | 0.069 |
| 489196 | 15 | 66191080  | 66191080  | T | A   | SNP | <i>MEGF11</i>          | ENST00000409699 | -1 | missense                    | c.2960       | p.N987I  | tier1 | 66  | 1  | 0.015 | 41   | 28  | 0.406 |
| 489196 | 16 | 57712000  | 57712000  | G | T   | SNP | <i>GPR97</i>           | ENST00000333493 | 1  | intronic                    | c.346-82     | e4-82    | tier3 | 189 | 3  | 0.016 | 139  | 55  | 0.284 |
| 489196 | 16 | 66956068  | 66956068  | G | A   | SNP | <i>RRAD</i>            | ENST00000299759 | -1 | missense                    | c.838        | p.R280C  | tier1 | 66  | 1  | 0.015 | 60   | 28  | 0.318 |
| 489196 | 17 | 976071    | 976071    | C | T   | SNP | <i>ABR</i>             | ENST00000302538 | -1 | intronic                    | c.754-77     | e8-77    | tier3 | 81  | 0  | 0.000 | 71   | 27  | 0.273 |
| 489196 | 17 | 43185926  | 43185926  | G | A   | SNP | <i>NMT1</i>            | ENST00000258960 | 1  | 3_prime_untranslated_region | c.*2919      | NULL     | tier3 | 146 | 0  | 0.000 | 131  | 53  | 0.288 |
| 489196 | 17 | 62892220  | 62892220  | G | C   | SNP | <i>LRRC37A3</i>        | ENST00000319651 | -1 | missense                    | c.1156       | p.P386A  | tier1 | 374 | 0  | 0.000 | 512  | 109 | 0.175 |
| 489196 | 18 | 28971008  | 28971008  | C | T   | SNP | <i>DSG4</i>            | ENST00000359747 | 1  | intronic                    | c.685-33     | e7-33    | tier3 | 99  | 0  | 0.000 | 127  | 62  | 0.326 |
| 489196 | 19 | 40589158  | 40589158  | C | T   | SNP | <i>ZNF780A</i>         | ENST00000455521 | -1 | intronic                    | c.10-14      | e2-14    | tier3 | 208 | 1  | 0.005 | 178  | 87  | 0.327 |
| 489196 | 19 | 43920107  | 43920107  | C | T   | SNP | <i>TEX101</i>          | ENST00000253435 | 1  | silent                      | c.90         | p.L30    | tier1 | 77  | 0  | 0.000 | 40   | 22  | 0.355 |
| 489196 | 20 | 9496180   | 9496180   | G | T   | SNP | <i>LAMP5</i>           | ENST00000246070 | 1  | missense                    | c.145        | p.V49L   | tier1 | 90  | 1  | 0.011 | 98   | 86  | 0.467 |
| 489196 | 20 | 29623299  | 29623299  | G | A   | SNP | <i>FRG1B</i>           | ENST00000278882 | 1  | intronic                    | c.66+45      | e1+45    | tier3 | 691 | 9  | 0.013 | 1509 | 65  | 0.041 |
| 489196 | 20 | 31073554  | 31073555  | - | GTC | INS | <i>C20orf112</i>       | ENST00000201961 | -1 | 3_prime_untranslated_region | c.*9         | NULL     | tier3 | 76  | 0  | 0.000 | 74   | 36  | 0.327 |
| 489196 | 21 | 45820168  | 45820168  | C | T   | SNP | <i>TRPM2</i>           | ENST00000300482 | 1  | silent                      | c.2235       | p.G745   | tier1 | 50  | 0  | 0.000 | 40   | 19  | 0.322 |
| 489196 | 22 | 46677825  | 46677825  | G | A   | SNP | <i>TTC38</i>           | ENST00000445282 | 1  | intronic                    | c.561+210    | e6+210   | tier3 | 53  | 2  | 0.036 | 54   | 21  | 0.269 |
| 489196 | X  | 73041567  | 73041567  | C | T   | SNP | <i>XIST</i>            | ENST00000429829 | -1 | rna                         | NULL         | NULL     | tier1 | 38  | 1  | 0.026 | 57   | 33  | 0.367 |
| 489196 | X  | 153049418 | 153049418 | C | G   | SNP | <i>SRPK3</i>           | ENST00000370101 | 1  | intronic                    | c.908-11     | e10-11   | tier3 | 71  | 0  | 0.000 | 56   | 21  | 0.273 |
| 489196 | X  | 153799950 | 153799950 | G | A   | SNP | <i>G6PD</i>            | ENST00000369620 | -1 | 5_prime_flanking_region     | c.-25580     | NULL     | tier3 | 403 | 2  | 0.005 | 401  | 92  | 0.186 |
| 489513 | 1  | 71869848  | 71869849  | - | A   | INS | <i>NEGR1</i>           | ENST00000357731 | -1 | 3_prime_untranslated_region | c.*3281      | NULL     | tier4 | 172 | 2  | 0.012 | 156  | 82  | 0.345 |
| 489513 | 1  | 173684860 | 173684860 | A | G   | SNP | <i>KLHL20</i>          | ENST00000209884 | 1  | intronic                    | c.1-282      | e1-282   | tier2 | 100 | 4  | 0.039 | 84   | 84  | 0.500 |
| 489513 | 1  | 240351440 | 240351440 | T | C   | SNP | <i>FMN2</i>            | ENST00000319653 | 1  | intronic                    | c.1931-67    | e4-67    | tier3 | 137 | 2  | 0.014 | 79   | 80  | 0.503 |
| 489513 | 3  | 42735190  | 42735190  | C | T   | SNP | <i>HHATL</i>           | ENST00000310417 | -1 | nonsense                    | c.1167       | p.W389*  | tier1 | 92  | 2  | 0.021 | 72   | 54  | 0.429 |
| 489513 | 3  | 46792243  | 46792243  | C | T   | SNP | <i>PRSS50</i>          | ENST00000460241 | -1 | intronic                    | c.1-2102     | e1-2102  | tier2 | 30  | 0  | 0.000 | 16   | 16  | 0.500 |
| 489513 | 3  | 53844274  | 53844274  | C | T   | SNP | <i>CACNA1D</i>         | ENST00000288139 | 1  | silent                      | c.6201       | p.F2067  | tier1 | 62  | 0  | 0.000 | 40   | 43  | 0.518 |
| 489513 | 4  | 76570299  | 76570299  | T | -   | DEL | <i>G3BP2</i>           | ENST00000359707 | -1 | 3_prime_untranslated_region | c.*315       | NULL     | tier3 | 92  | 0  | 0.000 | 155  | 16  | 0.094 |
| 489513 | 4  | 152498539 | 152498539 | G | A   | SNP | <i>FAM160A1</i>        | ENST00000435205 | 1  | intronic                    | c.106-63     | e2-63    | tier3 | 41  | 1  | 0.024 | 45   | 40  | 0.471 |
| 489513 | 5  | 20304957  | 20304957  | G | T   | SNP | <i>ENSG00000214132</i> | ENST00000502634 | -1 | 5_prime_untranslated_region | c.-20304957  | NULL     | tier3 | 155 | 4  | 0.025 | 159  | 117 | 0.424 |
| 489513 | 5  | 107929567 | 107929567 | C | T   | SNP | <i>ENSG00000244245</i> | ENST00000466800 | 1  | 3_prime_untranslated_region | c.*107929567 | NULL     | tier3 | 154 | 4  | 0.025 | 167  | 112 | 0.399 |
| 489513 | 5  | 137680472 | 137680472 | T | C   | SNP | <i>FAM53C</i>          | ENST00000239906 | 1  | intronic                    | c.137-42     | e3-42    | tier4 | 320 | 9  | 0.027 | 244  | 207 | 0.458 |
| 489513 | 5  | 140482438 | 140482438 | G | C   | SNP | <i>PCDHB3</i>          | ENST00000231130 | 1  | missense                    | c.2205       | p.Q735H  | tier1 | 212 | 2  | 0.009 | 283  | 67  | 0.191 |
| 489513 | 6  | 41011404  | 41011404  | G | T   | SNP | <i>TSPO2</i>           | ENST00000373161 | 1  | silent                      | c.282        | p.L94    | tier1 | 63  | 2  | 0.031 | 42   | 32  | 0.432 |
| 489513 | 7  | 131844359 | 131844359 | G | C   | SNP | <i>PLXNA4</i>          | ENST00000321063 | -1 | missense                    | c.4533       | p.N1511K | tier1 | 120 | 3  | 0.024 | 74   | 58  | 0.439 |
| 489513 | 8  | 56367730  | 56367730  | C | T   | SNP | <i>XKR4</i>            | ENST00000327381 | 1  | intronic                    | c.1007-68110 | e3-68110 | tier2 | 397 | 13 | 0.032 | 361  | 288 | 0.442 |
| 489513 | 8  | 74495119  | 74495119  | A | -   | DEL | <i>STAU2</i>           | ENST00000524300 | -1 | intronic                    | c.1162-54    | e9-54    | tier3 | 58  | 0  | 0.000 | 65   | 13  | 0.167 |
| 489513 | 9  | 16215272  | 16215272  | C | T   | SNP | <i>C9orf92</i>         | ENST00000380683 | -1 | missense                    | c.196        | p.G66R   | tier1 | 51  | 0  | 0.000 | 40   | 30  | 0.429 |
| 489513 | 9  | 32974446  | 32974446  | G | T   | SNP | <i>APTX</i>            | ENST00000379819 | -1 | splice_region               | c.916+10     | e7+10    | tier3 | 98  | 2  | 0.020 | 103  | 73  | 0.415 |
| 489513 | 9  | 101798470 | 101798470 | C | C   | SNP | <i>COL15A1</i>         | ENST00000375001 | 1  | missense                    | c.2308       | p.G770R  | tier1 | 112 | 2  | 0.018 | 119  | 80  | 0.402 |
| 489513 | 9  | 136402651 | 136402651 | G | A   | SNP | <i>ADAMTSL2</i>        | ENST00000393061 | 1  | missense                    | c.542        | p.R181Q  | tier1 | 167 | 1  | 0.006 | 126  | 92  | 0.422 |
| 489513 | 10 | 48373412  | 48373412  | G | A   | SNP | <i>ZNF488</i>          | ENST00000395702 | 1  | 3_prime_untranslated_region | c.*1857      | NULL     | tier3 | 84  | 1  | 0.012 | 63   | 41  | 0.394 |
| 489513 | 10 | 87615842  | 87615842  | G | A   | SNP | <i>GRID1</i>           | ENST00000327946 | -1 | missense                    | c.1057       | p.R353W  | tier1 | 724 | 2  | 0.003 | 1088 | 48  | 0.042 |
| 489513 | 11 | 32417288  | 32417288  | G | A   | SNP | <i>WT1</i>             | ENST00000332351 | -1 | intronic                    | c.1249+515   | e7+515   | tier4 | 245 | 5  | 0.020 | 280  | 90  | 0.242 |
| 489513 | 12 | 130883190 | 130883190 | C | A   | SNP | <i>RIMBP2</i>          | ENST00000261655 | -1 | 3_prime_untranslated_region | c.*490       | NULL     | tier3 | 88  | 2  | 0.022 | 107  | 69  | 0.390 |
| 489513 | 12 | 133050427 | 133050427 | A | G   | SNP | <i>MUC8</i>            | ENST00000595994 | -1 | intronic                    | c.148-131    | e2-131   | tier2 | 319 | 4  | 0.012 | 424  | 31  | 0.068 |
| 489513 | 15 | 97634474  | 97634474  | A | G   | SNP | <i>ENSG00000215948</i> | ENST00000401129 | -1 | 3_prime_flanking_region     | c.*18        | NULL     | tier4 | 128 | 2  | 0.015 | 127  | 102 | 0.444 |
| 489513 | 17 | 78180746  | 78180746  | C | T   | SNP | <i>SGSH</i>            | ENST00000575484 | -1 | rna                         | NULL         | NULL     | tier1 | 102 | 2  | 0.019 | 94   | 61  | 0.394 |
| 489513 | 18 | 72113811  | 72113811  | C | G   | SNP | <i>FAM69C</i>          | ENST00000343998 | -1 | intronic                    | c.876+30     | e2+30    | tier3 | 62  | 0  | 0.000 | 45   | 65  | 0.591 |
| 489513 | 19 | 38161162  | 38161162  | T | -   | DEL | <i>ZNF781</i>          | ENST00000358582 | -1 | 5_prime_untranslated_region | c.-113       | NULL     | tier3 | 106 | 1  | 0.009 | 159  | 16  | 0.091 |
| 489513 | 19 | 40834389  | 40834389  | G | T   | SNP | <i>C19orf47</i>        | ENST00000582783 | -1 | missense                    | c.481        | p.D161N  | tier1 | 122 | 2  | 0.016 | 77   | 89  | 0.536 |
| 489513 | 19 | 59081697  | 59081697  | C | A   | SNP | <i>MZF1</i>            | ENST00000595245 | -1 | 5_prime_untranslated_region | c.-59081697  | NULL     | tier3 | 79  | 5  | 0.059 |      |     |       |

|        |    |           |           |      |   |     |                 |                 |    |                             |              |           |       |      |    |       |      |     |       |
|--------|----|-----------|-----------|------|---|-----|-----------------|-----------------|----|-----------------------------|--------------|-----------|-------|------|----|-------|------|-----|-------|
| 489513 | X  | 119390658 | 119390658 | G    | T | SNP | ZBTB33          | ENST00000326624 | 1  | 3_prime_untranslated_region | c.*1369      | NULL      | tier2 | 60   | 1  | 0.016 | 71   | 15  | 0.174 |
| 491309 | 1  | 243288182 | 243288182 | T    | - | DEL | CEP170          | ENST00000468254 | -1 | rna                         | NULL         | NULL      | tier1 | 36   | 0  | 0.000 | 146  | 28  | 0.161 |
| 491309 | 5  | 179780316 | 179780316 | T    | C | SNP | GFP72           | ENST00000253778 | -1 | 5_prime_untranslated_region | c.-99        | NULL      | tier2 | 12   | 0  | 0.000 | 11   | 9   | 0.409 |
| 491309 | 7  | 2309174   | 2309174   | G    | A | SNP | SNX8            | ENST00000222990 | -1 | intronic                    | c.621+20     | e5+20     | tier3 | 26   | 0  | 0.000 | 28   | 9   | 0.231 |
| 491309 | 17 | 7577580   | 7577580   | T    | C | SNP | TP53            | ENST00000269305 | -1 | missense                    | c.701        | p.Y234C   | tier1 | 711  | 3  | 0.004 | 1093 | 44  | 0.039 |
| 491309 | 19 | 16629981  | 16629981  | C    | T | SNP | CHERP           | ENST00000546361 | -1 | missense                    | c.2740       | p.E914K   | tier1 | 99   | 0  | 0.000 | 156  | 16  | 0.093 |
| 496321 | 1  | 986249    | 986249    | C    | T | SNP | AGRN            | ENST00000379370 | 1  | intronic                    | c.5253+32    | e30+32    | tier2 | 27   | 0  | 0.000 | 22   | 24  | 0.522 |
| 496321 | 1  | 47276735  | 47276735  | G    | A | SNP | CYP4B1          | ENST00000371923 | 1  | intronic                    | c.323-77     | e3-77     | tier3 | 75   | 3  | 0.039 | 39   | 29  | 0.427 |
| 496321 | 1  | 114397144 | 114397144 | C    | A | SNP | PTPN22          | ENST00000359785 | -1 | missense                    | c.699        | p.R233S   | tier1 | 29   | 2  | 0.065 | 59   | 43  | 0.422 |
| 496321 | 2  | 89102427  | 89102427  | G    | A | SNP | ANKRD36BP2      | ENST00000393525 | 1  | rna                         | NULL         | NULL      | tier1 | 104  | 2  | 0.019 | 478  | 69  | 0.126 |
| 496321 | 2  | 241513196 | 241513196 | C    | T | SNP | RNPEPL1         | ENST00000270357 | 1  | missense                    | c.133        | p.R45C    | tier1 | 69   | 5  | 0.067 | 48   | 30  | 0.385 |
| 496321 | 3  | 25639916  | 25639916  | G    | A | SNP | TOP2B           | ENST00000264331 | -1 | missense                    | c.4763       | p.S1588L  | tier1 | 73   | 0  | 0.000 | 53   | 31  | 0.369 |
| 496321 | 3  | 38141928  | 38141928  | G    | A | SNP | DLEC1           | ENST00000346219 | 1  | intronic                    | c.2864+12    | e19+12    | tier3 | 92   | 6  | 0.061 | 47   | 40  | 0.460 |
| 496321 | 3  | 125643455 | 125643455 | C    | T | SNP | FAM86JP         | ENST00000467239 | 1  | intronic                    | c.NULL       | NULL      | tier3 | 56   | 1  | 0.018 | 29   | 31  | 0.517 |
| 496321 | 3  | 172835422 | 172835422 | A    | T | SNP | SPATA16         | ENST00000351008 | -1 | missense                    | c.100        | p.L34I    | tier1 | 62   | 2  | 0.031 | 64   | 46  | 0.418 |
| 496321 | 3  | 193125021 | 193125021 | G    | A | SNP | ATP13A4         | ENST00000342695 | -1 | intronic                    | c.3378+81    | e29+81    | tier3 | 65   | 2  | 0.030 | 47   | 33  | 0.413 |
| 496321 | 4  | 103822448 | 103822448 | G    | A | SNP | SLC9B1          | ENST00000296422 | -1 | silent                      | c.1374       | p.S458    | tier1 | 435  | 3  | 0.007 | 605  | 44  | 0.068 |
| 496321 | 4  | 106190881 | 106190881 | A    | T | SNP | TET2            | ENST00000380013 | 1  | missense                    | c.4159       | p.N1387Y  | tier1 | 297  | 17 | 0.054 | 195  | 224 | 0.535 |
| 496321 | 4  | 106193892 | 106193892 | C    | T | SNP | TET2            | ENST00000380013 | 1  | nonsense                    | c.4354       | p.R1452*  | tier1 | 702  | 34 | 0.046 | 568  | 426 | 0.428 |
| 496321 | 4  | 120446865 | 120446865 | G    | A | SNP | PDE5A           | ENST00000354960 | -1 | intronic                    | c.1633-15    | e12-15    | tier3 | 53   | 1  | 0.019 | 40   | 11  | 0.212 |
| 496321 | 4  | 153809253 | 153809253 | G    | A | SNP | ARFIP1          | ENST00000353617 | 1  | intronic                    | c.792-32     | e7-32     | tier3 | 24   | 0  | 0.000 | 51   | 18  | 0.261 |
| 496321 | 5  | 140202969 | 140202969 | C    | T | SNP | PCDHA5          | ENST00000529859 | 1  | missense                    | c.1609       | p.R537C   | tier1 | 482  | 37 | 0.071 | 306  | 270 | 0.469 |
| 496321 | 6  | 152746604 | 152746604 | C    | T | SNP | SYNE1           | ENST00000341594 | -1 | splice_site                 | c.5291-1     | e40-1     | tier1 | 55   | 1  | 0.018 | 83   | 63  | 0.429 |
| 496321 | 6  | 159660601 | 159660601 | G    | A | SNP | FNDC1           | ENST00000329629 | 1  | missense                    | c.3919       | p.G1307R  | tier1 | 160  | 13 | 0.075 | 91   | 88  | 0.492 |
| 496321 | 6  | 160199944 | 160199944 | G    | A | SNP | ACAT2           | ENST00000472052 | 1  | rna                         | NULL         | NULL      | tier1 | 46   | 2  | 0.041 | 77   | 67  | 0.465 |
| 496321 | 7  | 1132922   | 1132922   | G    | A | SNP | GPER1           | ENST00000297469 | 1  | 3_prime_untranslated_region | c.*430       | NULL      | tier2 | 99   | 2  | 0.020 | 42   | 38  | 0.475 |
| 496321 | 7  | 100652450 | 100652450 | T    | C | SNP | MUC12           | ENST00000536621 | 1  | splice_region               | c.15251+10   | e5+10     | tier2 | 59   | 3  | 0.048 | 67   | 59  | 0.468 |
| 496321 | 7  | 150835438 | 150835438 | G    | A | SNP | AGAP3           | ENST00000397238 | 1  | intronic                    | c.1666+38    | e12+38    | tier2 | 84   | 1  | 0.012 | 50   | 25  | 0.333 |
| 496321 | 12 | 48375943  | 48375943  | C    | T | SNP | COL2A1          | ENST00000380518 | -1 | missense                    | c.2302       | p.G768S   | tier1 | 106  | 5  | 0.045 | 60   | 62  | 0.508 |
| 496321 | 13 | 61141522  | 61141522  | C    | T | SNP | TDRD3           | ENST00000535286 | 1  | intronic                    | c.2119-137   | e13-137   | tier3 | 70   | 4  | 0.053 | 107  | 84  | 0.440 |
| 496321 | 14 | 75248223  | 75248223  | C    | T | SNP | YLP1M           | ENST00000325680 | 1  | nonsense                    | c.1477       | p.Q493*   | tier1 | 61   | 4  | 0.062 | 67   | 51  | 0.432 |
| 496321 | 15 | 42434172  | 42434172  | C    | T | SNP | PLA2G4F         | ENST00000397272 | -1 | 3_prime_untranslated_region | c.*10        | NULL      | tier3 | 59   | 5  | 0.078 | 38   | 37  | 0.493 |
| 496321 | 15 | 72958364  | 72958364  | C    | G | SNP | GOLGA6B         | ENST00000421285 | 1  | missense                    | c.1849       | p.H617D   | tier1 | 212  | 0  | 0.000 | 192  | 32  | 0.143 |
| 496321 | 15 | 75219024  | 75219024  | A    | G | SNP | COX5A           | ENST00000322347 | -1 | intronic                    | c.339+83     | e3+83     | tier3 | 15   | 0  | 0.000 | 29   | 38  | 0.567 |
| 496321 | 16 | 29820921  | 29820921  | C    | T | SNP | MAZ             | ENST00000219782 | 1  | missense                    | c.1340       | p.P447L   | tier1 | 48   | 1  | 0.020 | 18   | 19  | 0.514 |
| 496321 | 16 | 33497567  | 33497567  | C    | T | SNP | BMS1P8          | ENST00000565156 | -1 | rna                         | NULL         | NULL      | tier1 | 354  | 3  | 0.008 | 573  | 35  | 0.058 |
| 496321 | 19 | 33792431  | 33792431  | C    | G | SNP | CEBPA           | ENST00000498907 | -1 | missense                    | c.890        | p.R297P   | tier1 | 1145 | 61 | 0.050 | 682  | 577 | 0.458 |
| 496321 | 19 | 36727961  | 36727961  | T    | C | SNP | ZNF146          | ENST00000443387 | 1  | missense                    | c.619        | p.S207P   | tier1 | 29   | 2  | 0.065 | 54   | 46  | 0.455 |
| 496321 | 19 | 55697038  | 55697038  | G    | A | SNP | PTPRH           | ENST00000376350 | -1 | splice_region               | c.2902-8     | e18-8     | tier3 | 36   | 3  | 0.077 | 26   | 24  | 0.480 |
| 496321 | X  | 49189242  | 49189242  | -    | A | INS | GAGE13          | ENST00000381751 | 1  | frame_shift_ins             | c.27_28      | p.Y9fs    | tier1 | 14   | 0  | 0.000 | 3    | 4   | 0.571 |
| 496321 | Y  | 22923114  | 22923114  | C    | T | SNP | RPS4Y2          | ENST00000288666 | 1  | intronic                    | c.263-56     | e4-56     | tier3 | 36   | 3  | 0.077 | 7    | 54  | 0.885 |
| 499258 | 1  | 40033490  | 40033490  | T    | C | SNP | PABPC4          | ENST00000372858 | -1 | missense                    | c.905        | p.D302G   | tier1 | 145  | 1  | 0.007 | 205  | 51  | 0.199 |
| 499258 | 1  | 155028802 | 155028802 | C    | G | SNP | ADAM15          | ENST00000525020 | 1  | 3_prime_untranslated_region | c.*155028802 | NULL      | tier3 | 34   | 0  | 0.000 | 138  | 32  | 0.188 |
| 499258 | 1  | 182850554 | 182850554 | G    | G | SNP | DHX9            | ENST00000367549 | 1  | missense                    | c.2780       | p.D927G   | tier1 | 109  | 0  | 0.000 | 161  | 31  | 0.162 |
| 499258 | 1  | 240969528 | 240969528 | A    | A | SNP | RGS7            | ENST00000407727 | -1 | missense                    | c.1181       | p.P394L   | tier1 | 45   | 0  | 0.000 | 155  | 41  | 0.209 |
| 499258 | 2  | 6879873   | 6879873   | T    | - | DEL | LINC00487       | ENST00000382045 | -1 | intronic                    | c.NULL       | NULL      | tier2 | 49   | 0  | 0.000 | 130  | 32  | 0.198 |
| 499258 | 2  | 43905981  | 43905981  | A    | G | SNP | PLEKHH2         | ENST00000282406 | 1  | intronic                    | c.124-21     | e2-21     | tier2 | 232  | 3  | 0.013 | 240  | 70  | 0.225 |
| 499258 | 2  | 88825827  | 88825827  | C    | T | SNP | C2orf51         | ENST00000303254 | 1  | intronic                    | c.28-96      | e2-96     | tier4 | 70   | 0  | 0.000 | 149  | 27  | 0.153 |
| 499258 | 2  | 197645323 | 197645323 | A    | G | SNP | GTF3C3          | ENST00000263956 | -1 | missense                    | c.1178       | p.M393T   | tier1 | 81   | 0  | 0.000 | 93   | 21  | 0.184 |
| 499258 | 4  | 100266176 | 100266176 | G    | A | SNP | ADH1C           | ENST00000515683 | -1 | missense                    | c.410        | p.P137L   | tier1 | 63   | 0  | 0.000 | 237  | 75  | 0.240 |
| 499258 | 7  | 98639905  | 98639905  | T    | - | DEL | SMURF1          | ENST00000361125 | -1 | intronic                    | c.1335-50    | e13-50    | tier4 | 38   | 0  | 0.000 | 87   | 16  | 0.155 |
| 499258 | 7  | 135376425 | 135376425 | G    | A | SNP | C7orf73         | ENST00000422968 | 1  | 3_prime_untranslated_region | c.*135376425 | NULL      | tier3 | 57   | 1  | 0.017 | 96   | 30  | 0.238 |
| 499258 | 7  | 144060684 | 144060684 | G    | A | SNP | ARHGEF5         | ENST00000056217 | 1  | missense                    | c.922        | p.E308K   | tier1 | 17   | 0  | 0.000 | 72   | 37  | 0.339 |
| 499258 | 9  | 87322805  | 87322805  | C    | T | SNP | NTRK2           | ENST00000277120 | 1  | missense                    | c.406        | p.R136C   | tier1 | 116  | 0  | 0.000 | 159  | 20  | 0.112 |
| 499258 | 10 | 22680773  | 22680773  | T    | C | SNP | SPAG6           | ENST00000376603 | 1  | missense                    | c.1349       | p.V450A   | tier1 | 58   | 0  | 0.000 | 141  | 32  | 0.185 |
| 499258 | 10 | 49291796  | 49291796  | C    | T | SNP | ENSG00000249871 | ENST00000506185 | -1 | intronic                    | c.NULL       | NULL      | tier3 | 123  | 2  | 0.016 | 88   | 24  | 0.214 |
| 499258 | 12 | 100904941 | 100904941 | A    | T | SNP | NR1H4           | ENST00000551379 | 1  | intronic                    | c.475+20     | e2+20     | tier3 | 43   | 0  | 0.000 | 107  | 25  | 0.189 |
| 499258 | 15 | 25224990  | 25224990  | T    | C | SNP | SNURF           | ENST00000551312 | 1  | intronic                    | c.216-104    | e4-104    | tier2 | 68   | 0  | 0.000 | 84   | 25  | 0.229 |
| 499258 | 16 | 72821316  | 72821316  | A    | G | SNP | ZFH3            | ENST00000268489 | -1 | missense                    | c.10859      | p.V3620A  | tier1 | 43   | 0  | 0.000 | 193  | 49  | 0.203 |
| 499258 | 17 | 38450574  | 38450574  | G    | T | SNP | CDC6            | ENST00000209728 | 1  | intronic                    | c.944-42     | e6-42     | tier2 | 107  | 0  | 0.000 | 113  | 27  | 0.193 |
| 499258 | 17 | 42152474  | 42152474  | G    | A | SNP | G6PC3           | ENST00000269097 | 1  | intronic                    | c.535+19     | e4+19     | tier2 | 30   | 0  | 0.000 | 120  | 30  | 0.200 |
| 499258 | 19 | 56423693  | 56423693  | G    | A | SNP | NLRP13          | ENST00000342929 | -1 | missense                    | c.1490       | p.T497M   | tier1 | 39   | 0  | 0.000 | 72   | 14  | 0.163 |
| 499258 | 21 | 16337046  | 16337049  | TTCT | - | DEL | NR1P1           | ENST00000318948 | -1 | frame_shift_del             | c.3468_3465  | p.K1155fs | tier1 | 83   | 1  | 0.012 | 119  | 17  | 0.125 |
| 499258 | 21 | 36252865  | 36252865  | C    | G | SNP | RUNX1           | ENST00000300305 | -1 | missense                    | c.497        | p.R166P   | tier1 | 353  | 1  | 0.003 | 1294 | 196 | 0.132 |
| 499258 | 22 | 21804391  | 21804391  | A    | G | SNP | HIC2            | ENST00000407464 | 1  | 3_prime_untranslated_region | c.*3359      | NULL      | tier3 | 84   | 0  | 0.000 | 189  | 36  | 0.160 |
| 499258 | X  | 24813697  | 24813697  | T    | C | SNP | POLA1           | ENST00000379068 | 1  | intronic                    | c.2965-14318 | e27-14318 | tier3 | 55   | 0  | 0.000 | 61   | 55  | 0.474 |
| 502635 | 1  | 28208733  | 28208733  | C    | T | SNP | THEMIS2         | ENST00000373921 | 1  | missense                    | c.898        | p.R300W   | tier1 | 124  | 1  | 0.008 | 126  | 16  | 0.112 |
| 502635 | 1  | 52912122  | 52912122  | T    | A | SNP | ZCCHC11         | ENST00000257177 | -1 | splice_region               | c.3514-8     | e21-8     | tier3 | 120  | 2  | 0.016 | 78   | 14  | 0.151 |
| 502635 | 1  | 235617686 | 235617686 | A    | C | SNP | B3GALNT2        | ENST00000366600 | -1 |                             |              |           |       |      |    |       |      |     |       |



|        |    |           |           |       |   |     |                 |                 |    |                             |                 |          |       |      |    |       |     |     |       |
|--------|----|-----------|-----------|-------|---|-----|-----------------|-----------------|----|-----------------------------|-----------------|----------|-------|------|----|-------|-----|-----|-------|
| 502635 | 7  | 29546764  | 29546764  | T     | - | DEL | CHN2            | ENST00000539406 | 1  | intronic                    | c.1217-80       | e12-80   | tier3 | 43   | 0  | 0.000 | 33  | 10  | 0.233 |
| 502635 | 11 | 89515227  | 89515227  | G     | T | SNP | TRIM64DP        | ENST00000529289 | 1  | 3_prime_untranslated_region | c.*89515227     | NULL     | tier3 | 305  | 0  | 0.000 | 323 | 26  | 0.075 |
| 502635 | 12 | 5840529   | 5840529   | A     | - | DEL | ANO2            | ENST00000356134 | -1 | intronic                    | c.1548+1157     | e16+1157 | tier3 | 60   | 0  | 0.000 | 71  | 13  | 0.155 |
| 502635 | 12 | 119583250 | 119583250 | G     | A | SNP | SRRM4           | ENST00000267260 | 1  | missense                    | c.836           | p.R279Q  | tier1 | 66   | 0  | 0.000 | 54  | 8   | 0.129 |
| 502635 | 13 | 101881935 | 101881935 | C     | T | SNP | NALCN           | ENST00000251127 | -1 | missense                    | c.1435          | p.V479I  | tier1 | 487  | 0  | 0.000 | 486 | 26  | 0.051 |
| 502635 | 14 | 106573418 | 106573418 | T     | C | SNP | IGHV3-11        | ENST00000390601 | -1 | missense                    | c.166           | p.I56V   | tier1 | 166  | 7  | 0.040 | 150 | 36  | 0.194 |
| 502635 | 14 | 106573482 | 106573482 | T     | C | SNP | IGHV3-11        | ENST00000390601 | -1 | silent                      | c.102           | p.G34    | tier1 | 195  | 5  | 0.025 | 164 | 33  | 0.168 |
| 502635 | 14 | 106573491 | 106573491 | G     | T | SNP | IGHV3-11        | ENST00000390601 | -1 | silent                      | c.93            | p.V31    | tier1 | 200  | 5  | 0.024 | 164 | 33  | 0.168 |
| 502635 | 15 | 31086780  | 31086780  | G     | T | SNP | GOLGA8UP        | ENST00000527159 | 1  | 3_prime_untranslated_region | c.*31086780     | NULL     | tier3 | 520  | 1  | 0.002 | 493 | 44  | 0.082 |
| 502635 | 15 | 43995984  | 43995984  | C     | G | SNP | STRC            | ENST00000541030 | -1 | intronic                    | c.1+14335       | e0+14335 | tier3 | 90   | 0  | 0.000 | 65  | 8   | 0.110 |
| 502635 | 15 | 65715171  | 65715171  | G     | A | SNP | IGDCC4          | ENST00000352385 | -1 | silent                      | c.30            | p.R10    | tier1 | 8    | 0  | 0.000 | 0   | 5   | 1.000 |
| 502635 | 16 | 9212075   | 9212079   | TATTA | - | DEL | C16orf72        | ENST00000327827 | 1  | 3_prime_untranslated_region | c.*1306         | NULL     | tier2 | 161  | 0  | 0.000 | 76  | 6   | 0.073 |
| 502635 | 17 | 1326754   | 1326754   | G     | A | SNP | CRK             | ENST00000572145 | -1 | rna                         | NULL            | NULL     | tier1 | 106  | 0  | 0.000 | 120 | 10  | 0.076 |
| 502635 | 17 | 7577538   | 7577538   | C     | T | SNP | TP53            | ENST00000269305 | -1 | missense                    | c.743           | p.R248Q  | tier1 | 1010 | 2  | 0.002 | 931 | 73  | 0.073 |
| 502635 | 17 | 7578551   | 7578551   | A     | T | SNP | TP53            | ENST00000269305 | -1 | missense                    | c.379           | p.S127T  | tier1 | 1112 | 5  | 0.005 | 988 | 82  | 0.077 |
| 502635 | 18 | 47455964  | 47455964  | C     | A | SNP | MYO5B           | ENST00000285039 | -1 | missense                    | c.2008          | p.D670Y  | tier1 | 197  | 4  | 0.020 | 200 | 25  | 0.111 |
| 502635 | 19 | 852255    | 852255    | G     | T | SNP | ELANE           | ENST00000590230 | 1  | 5_prime_untranslated_region | c.-74           | NULL     | tier2 | 748  | 0  | 0.000 | 579 | 41  | 0.066 |
| 502635 | 21 | 35471902  | 35471903  | -     | T | INS | SLC5A3          | ENST00000381151 | 1  | 3_prime_untranslated_region | c.*2248         | NULL     | tier3 | 79   | 0  | 0.000 | 66  | 8   | 0.108 |
| 565435 | 1  | 91402928  | 91402928  | A     | G | SNP | ZNF644          | ENST00000337393 | -1 | intronic                    | c.3688+114      | e3+114   | tier3 | 9    | 0  | 0.000 | 26  | 37  | 0.587 |
| 565435 | 1  | 114641862 | 114641862 | G     | A | SNP | SYT6            | ENST00000393296 | -1 | silent                      | c.1218          | p.L406   | tier1 | 132  | 0  | 0.000 | 114 | 50  | 0.303 |
| 565435 | 1  | 150246585 | 150246585 | A     | C | SNP | C1orf54         | ENST00000369099 | 1  | intronic                    | c.130+12        | e2+12    | tier3 | 81   | 2  | 0.024 | 110 | 28  | 0.203 |
| 565435 | 2  | 86267544  | 86267544  | G     | A | SNP | POLR1A          | ENST00000263857 | -1 | silent                      | c.3711          | p.G1237  | tier1 | 121  | 2  | 0.016 | 71  | 32  | 0.311 |
| 565435 | 2  | 97849131  | 97849131  | A     | G | SNP | ANKRD36         | ENST00000420699 | 1  | intronic                    | c.1838-65       | e27-65   | tier3 | 72   | 2  | 0.027 | 158 | 58  | 0.269 |
| 565435 | 2  | 130750444 | 130750444 | C     | T | SNP | ENSG00000250207 | ENST00000511039 | -1 | 5_prime_untranslated_region | c.-130750444    | NULL     | tier2 | 390  | 1  | 0.003 | 358 | 66  | 0.155 |
| 565435 | 2  | 219267322 | 219267322 | C     | A | SNP | CTDSP1          | ENST00000273062 | 1  | intronic                    | c.378+194       | e4+194   | tier3 | 63   | 0  | 0.000 | 58  | 15  | 0.206 |
| 565435 | 3  | 44776777  | 44776777  | T     | C | SNP | ZNF501          | ENST00000396048 | 1  | 3_prime_untranslated_region | c.*48           | NULL     | tier3 | 39   | 0  | 0.000 | 76  | 22  | 0.225 |
| 565435 | 3  | 133465239 | 133465239 | A     | G | SNP | TF              | ENST00000402696 | 1  | 5_prime_untranslated_region | c.-46           | NULL     | tier2 | 33   | 1  | 0.029 | 24  | 15  | 0.385 |
| 565435 | 3  | 155314188 | 155314188 | T     | C | SNP | PLCH1           | ENST00000340059 | -1 | intronic                    | c.44-21         | e2-21    | tier3 | 25   | 0  | 0.000 | 13  | 6   | 0.316 |
| 565435 | 3  | 185300560 | 185300560 | G     | C | SNP | SENP2           | ENST00000545472 | 1  | missense                    | c.26            | p.C9S    | tier1 | 186  | 4  | 0.021 | 134 | 41  | 0.233 |
| 565435 | 4  | 73615881  | 73615881  | G     | A | SNP | -               | -               | -  | -                           | -               | -        | tier3 | 87   | 4  | 0.044 | 133 | 53  | 0.285 |
| 565435 | 4  | 148457005 | 148457006 | -     | T | INS | EDNRA           | ENST00000324300 | 1  | intronic                    | c.748-24_748-23 | e4-23    | tier3 | 30   | 0  | 0.000 | 27  | 9   | 0.250 |
| 565435 | 5  | 13900350  | 13900350  | G     | A | SNP | DNAH5           | ENST00000265104 | -1 | nonsense                    | c.2224          | p.R742*  | tier1 | 446  | 5  | 0.011 | 475 | 166 | 0.259 |
| 565435 | 5  | 43295963  | 43295963  | G     | A | SNP | HMGCS1          | ENST00000325110 | -1 | missense                    | c.796           | p.P266S  | tier1 | 36   | 0  | 0.000 | 98  | 25  | 0.203 |
| 565435 | 6  | 31974832  | 31974832  | G     | A | SNP | CYP21A1P        | ENST00000342991 | 1  | 3_prime_untranslated_region | c.*31974832     | NULL     | tier3 | 136  | 2  | 0.015 | 81  | 31  | 0.274 |
| 565435 | 6  | 54208081  | 54208081  | C     | T | SNP | TINAG           | ENST00000259782 | 1  | missense                    | c.682           | p.P228S  | tier1 | 40   | 0  | 0.000 | 73  | 37  | 0.336 |
| 565435 | 6  | 80774316  | 80774316  | T     | G | SNP | ENSG00000218418 | ENST00000401578 | -1 | 5_prime_untranslated_region | c.-80774316     | NULL     | tier3 | 135  | 1  | 0.007 | 117 | 41  | 0.260 |
| 565435 | 7  | 5434025   | 5434025   | A     | T | SNP | TNRC18          | ENST00000399537 | -1 | intronic                    | c.343+46        | e2+46    | tier3 | 197  | 5  | 0.025 | 133 | 83  | 0.384 |
| 565435 | 7  | 122255199 | 122255199 | A     | C | SNP | CADPS2          | ENST00000449022 | -1 | intronic                    | c.1223+36       | e6+36    | tier3 | 63   | 1  | 0.016 | 75  | 30  | 0.283 |
| 565435 | 7  | 150894251 | 150894251 | C     | T | SNP | IQCA1P1         | ENST00000602757 | -1 | intronic                    | c.NULL          | NULL     | tier3 | 77   | 1  | 0.013 | 78  | 31  | 0.284 |
| 565435 | 8  | 144399939 | 144399939 | G     | A | SNP | TOP1MT          | ENST00000329245 | -1 | silent                      | c.1284          | p.Y428   | tier1 | 155  | 3  | 0.019 | 119 | 36  | 0.232 |
| 565435 | 9  | 32631391  | 32631391  | T     | C | SNP | TAF1L           | ENST00000242310 | -1 | missense                    | c.4187          | p.R1396H | tier1 | 160  | 1  | 0.006 | 144 | 36  | 0.200 |
| 565435 | 9  | 74299332  | 74299332  | C     | C | SNP | TMEM2           | ENST00000377057 | -1 | 5_prime_untranslated_region | c.-74299332     | NULL     | tier3 | 41   | 0  | 0.000 | 75  | 37  | 0.330 |
| 565435 | 9  | 84608191  | 84608191  | T     | C | SNP | SPATA31D1       | ENST00000344803 | 1  | missense                    | c.2806          | p.S936P  | tier1 | 128  | 0  | 0.000 | 130 | 59  | 0.312 |
| 565435 | 10 | 95849013  | 95849013  | G     | A | SNP | PLCE1           | ENST00000371375 | 1  | silent                      | c.162           | p.Q54    | tier1 | 923  | 14 | 0.015 | 640 | 239 | 0.272 |
| 565435 | 11 | 27528351  | 27528352  | -     | G | INS | LGR4            | ENST00000379214 | -1 | 5_prime_flanking_region     | c.-34502        | NULL     | tier2 | 128  | 3  | 0.023 | 88  | 22  | 0.200 |
| 565435 | 11 | 56738588  | 56738588  | G     | A | SNP | OR5AK3P         | ENST00000326876 | 1  | 3_prime_untranslated_region | c.*56738588     | NULL     | tier3 | 54   | 0  | 0.000 | 120 | 18  | 0.130 |
| 565435 | 12 | 102140522 | 102140523 | -     | A | INS | GNPTAB          | ENST00000299314 | -1 | 3_prime_untranslated_region | c.*420          | NULL     | tier3 | 59   | 0  | 0.000 | 108 | 16  | 0.129 |
| 565435 | 14 | 19685459  | 19685459  | C     | T | SNP | LOC440157       | ENST00000418499 | 1  | rna                         | NULL            | NULL     | tier1 | 74   | 0  | 0.000 | 63  | 11  | 0.149 |
| 565435 | 14 | 21853909  | 21853909  | C     | T | SNP | CHD8            | ENST00000399982 | -1 | missense                    | c.7609          | p.E2537K | tier1 | 58   | 0  | 0.000 | 43  | 21  | 0.328 |
| 565435 | 14 | 56120281  | 56120281  | C     | G | SNP | KTN1            | ENST00000395309 | 1  | missense                    | c.2768          | p.S923C  | tier1 | 37   | 0  | 0.000 | 89  | 32  | 0.265 |
| 565435 | 15 | 79065337  | 79065337  | C     | T | SNP | ADAMTS7         | ENST00000388820 | -1 | intronic                    | c.2131+88       | e12+88   | tier3 | 85   | 2  | 0.023 | 66  | 21  | 0.241 |
| 565435 | 15 | 90631934  | 90631934  | C     | T | SNP | IDH2            | ENST00000330062 | -1 | missense                    | c.419           | p.R140Q  | tier1 | 701  | 10 | 0.014 | 588 | 212 | 0.265 |
| 565435 | 16 | 69738490  | 69738490  | C     | T | SNP | ENSG00000260772 | ENST00000561622 | 1  | rna                         | NULL            | NULL     | tier1 | 30   | 0  | 0.000 | 60  | 25  | 0.294 |
| 565435 | 17 | 10402323  | 10402323  | C     | T | SNP | MYH1            | ENST00000226207 | -1 | missense                    | c.3952          | p.E1318K | tier1 | 169  | 0  | 0.000 | 250 | 20  | 0.074 |
| 565435 | 17 | 56620367  | 56620367  | G     | T | SNP | C17orf47        | ENST00000321691 | -1 | missense                    | c.1181          | p.P394Q  | tier1 | 139  | 5  | 0.035 | 101 | 37  | 0.266 |
| 565435 | 17 | 74732959  | 74732959  | G     | T | SNP | SRSF2           | ENST00000359995 | -1 | missense                    | c.284           | p.P95H   | tier1 | 488  | 4  | 0.008 | 360 | 143 | 0.283 |
| 565435 | 19 | 11342899  | 11342899  | G     | A | SNP | DOCK6           | ENST00000319867 | -1 | missense                    | c.697           | p.R233W  | tier1 | 97   | 0  | 0.000 | 62  | 35  | 0.357 |
| 565435 | 20 | 31022441  | 31022442  | -     | G | INS | ASXL1           | ENST00000375687 | 1  | frame_shift_ins             | c.1926_1927     | p.G645fs | tier1 | 1055 | 26 | 0.024 | 802 | 238 | 0.229 |
| 565435 | 22 | 18027848  | 18027848  | G     | T | SNP | CECR2           | ENST00000400573 | 1  | missense                    | c.2805          | p.L935F  | tier1 | 421  | 7  | 0.016 | 531 | 50  | 0.086 |
| 565435 | X  | 39916576  | 39916576  | T     | C | SNP | BCOR            | ENST00000378444 | -1 | splice_site                 | c.4429-2        | e10-2    | tier1 | 214  | 0  | 0.000 | 208 | 30  | 0.126 |
| 565435 | X  | 123197716 | 123197716 | C     | C | SNP | STAG2           | ENST00000218089 | 1  | nonsense                    | c.1840          | p.R614*  | tier1 | 113  | 0  | 0.000 | 311 | 64  | 0.170 |
| 565435 | X  | 123220440 | 123220440 | C     | T | SNP | STAG2           | ENST00000218089 | 1  | nonsense                    | c.3097          | p.R1033* | tier1 | 258  | 4  | 0.015 | 279 | 101 | 0.266 |
| 596762 | 1  | 26314633  | 26314634  | -     | T | INS | PAFAH2          | ENST00000374282 | -1 | intronic                    | c.341+88_341+87 | e3+88    | tier3 | 50   | 0  | 0.000 | 69  | 19  | 0.216 |
| 596762 | 1  | 77987426  | 77987426  | C     | T | SNP | AK5             | ENST00000354567 | 1  | intronic                    | c.1312-86       | e12-86   | tier3 | 45   | 0  | 0.000 | 61  | 11  | 0.153 |
| 596762 | 1  | 97144881  | 97144881  | T     | C | SNP | ENSG00000137970 | ENST00000468715 | -1 | 5_prime_untranslated_region | c.-97144881     | NULL     | tier3 | 91   | 1  | 0.011 | 68  | 25  | 0.269 |
| 596762 | 1  | 177906320 | 177906320 | A     | T | SNP | SEC16B          | ENST00000308284 | -1 | intronic                    | c.2503+29       | e18+29   | tier3 | 37   | 0  | 0.000 | 23  | 25  | 0.521 |
| 596762 | 3  | 114214866 | 114214866 | T     | - | DEL | ZBTB20          | ENST00000357258 | -1 | intronic                    | c.1+4333        | e0+4333  | tier3 | 83   | 1  | 0.012 | 101 | 15  | 0.129 |
| 596762 | 4  | 2160973   | 2160973   | G     | A | SNP | POLN            | ENST00000382865 | -1 | intronic                    | c.1555-35       | e12-35   | tier3 | 73   | 1  | 0.014 | 61  | 38  | 0.384 |
| 596762 | 4  | 17528425  | 17528425  | C     | A | SNP | CLRN2           | ENST00000       |    |                             |                 |          |       |      |    |       |     |     |       |

|        |    |           |           |       |   |     |                 |                 |    |                             |               |           |       |      |    |       |      |     |       |
|--------|----|-----------|-----------|-------|---|-----|-----------------|-----------------|----|-----------------------------|---------------|-----------|-------|------|----|-------|------|-----|-------|
| 596762 | 11 | 92531510  | 92531510  | C     | T | SNP | FAT3            | ENST00000298047 | 1  | silent                      | c.5331        | p.S1777   | tier1 | 49   | 0  | 0.000 | 43   | 16  | 0.267 |
| 596762 | 12 | 57850452  | 57850452  | G     | C | SNP | INHBE           | ENST00000266646 | 1  | missense                    | c.874         | p.A292P   | tier1 | 63   | 1  | 0.015 | 59   | 21  | 0.263 |
| 596762 | 12 | 113379563 | 113379563 | G     | T | SNP | OAS3            | ENST00000228928 | 1  | missense                    | c.366         | p.E122D   | tier1 | 31   | 0  | 0.000 | 37   | 17  | 0.315 |
| 596762 | 13 | 86369756  | 86369756  | C     | T | SNP | SLITRK6         | ENST00000400286 | -1 | missense                    | c.888         | p.M296I   | tier1 | 103  | 0  | 0.000 | 90   | 43  | 0.323 |
| 596762 | 14 | 62547892  | 62547892  | G     | A | SNP | SYT16           | ENST00000430451 | 1  | missense                    | c.1334        | p.R445Q   | tier1 | 115  | 0  | 0.000 | 131  | 12  | 0.084 |
| 596762 | 15 | 85401550  | 85401550  | G     | A | SNP | ALPK3           | ENST00000258888 | 1  | missense                    | c.4187        | p.R1396Q  | tier1 | 420  | 1  | 0.002 | 364  | 201 | 0.353 |
| 596762 | 17 | 4109540   | 4109540   | A     | G | SNP | ANKFY1          | ENST00000570535 | -1 | intronic                    | c.1024+76     | e7+76     | tier3 | 48   | 0  | 0.000 | 37   | 25  | 0.403 |
| 596762 | 17 | 38438120  | 38438120  | G     | C | SNP | WIPF2           | ENST00000323571 | 1  | 3_prime_untranslated_region | c.*3643       | NULL      | tier3 | 88   | 1  | 0.011 | 86   | 53  | 0.381 |
| 596762 | 17 | 56357291  | 56357291  | C     | A | SNP | MPO             | ENST00000340482 | -1 | silent                      | c.333         | p.T111    | tier1 | 62   | 2  | 0.031 | 60   | 29  | 0.326 |
| 596762 | 18 | 7774085   | 7774085   | T     | A | SNP | PTPRM           | ENST00000400060 | 1  | intronic                    | c.74-62       | e2-62     | tier3 | 76   | 0  | 0.000 | 72   | 31  | 0.301 |
| 596762 | 20 | 34430474  | 34430475  | -     | T | INS | PHF20           | ENST00000374012 | 1  | intronic                    | c.84-21_84-20 | e2-20     | tier3 | 92   | 1  | 0.011 | 119  | 15  | 0.112 |
| 596762 | 20 | 45355585  | 45355585  | G     | A | SNP | SLC2A10         | ENST00000359271 | 1  | silent                      | c.1371        | p.A457    | tier1 | 51   | 0  | 0.000 | 59   | 24  | 0.286 |
| 596762 | 20 | 60895795  | 60895795  | C     | G | SNP | LAMA5           | ENST00000252999 | -1 | missense                    | c.6648        | p.Q2216H  | tier1 | 72   | 0  | 0.000 | 54   | 15  | 0.217 |
| 597501 | 2  | 21228297  | 21228297  | C     | T | SNP | APOB            | ENST00000233242 | -1 | missense                    | c.11443       | p.V3815M  | tier1 | 991  | 7  | 0.007 | 874  | 56  | 0.060 |
| 597501 | 2  | 61006923  | 61006923  | G     | A | SNP | PAPOLG          | ENST00000238714 | 1  | intronic                    | c.833+13      | e9+13     | tier3 | 117  | 2  | 0.017 | 65   | 30  | 0.316 |
| 597501 | 2  | 66796098  | 66796099  | -     | T | INS | MEIS1           | ENST00000488550 | 1  | 3_prime_untranslated_region | c.*187        | NULL      | tier3 | 87   | 0  | 0.000 | 66   | 9   | 0.120 |
| 597501 | 2  | 99936266  | 99936266  | A     | - | DEL | TXNDC9          | ENST00000264255 | -1 | splice_region_del           | c.564-4       | e4-4      | tier3 | 31   | 0  | 0.000 | 38   | 11  | 0.225 |
| 597501 | 2  | 121744080 | 121744080 | G     | A | SNP | GLI2            | ENST00000361492 | 1  | missense                    | c.2183        | p.R728Q   | tier1 | 60   | 1  | 0.016 | 49   | 57  | 0.533 |
| 597501 | 2  | 179363925 | 179363925 | C     | T | SNP | PLEKHA3         | ENST00000234453 | 1  | intronic                    | c.616-13      | e6-13     | tier3 | 67   | 1  | 0.015 | 59   | 13  | 0.181 |
| 597501 | 3  | 38913145  | 38913145  | C     | A | SNP | SCN11A          | ENST00000302328 | -1 | missense                    | c.3550        | p.V1184F  | tier1 | 63   | 0  | 0.000 | 42   | 25  | 0.373 |
| 597501 | 3  | 138724564 | 138724564 | C     | T | SNP | PRR23A          | ENST00000383163 | -1 | missense                    | c.547         | p.A183T   | tier1 | 178  | 2  | 0.011 | 193  | 33  | 0.145 |
| 597501 | 4  | 89022286  | 89022286  | C     | T | SNP | ABCG2           | ENST00000237612 | -1 | intronic                    | c.1367+96     | e10+96    | tier3 | 196  | 8  | 0.039 | 176  | 176 | 0.499 |
| 597501 | 4  | 106157074 | 106157074 | C     | T | SNP | TET2            | ENST00000380013 | 1  | nonsense                    | c.1975        | p.Q659*   | tier1 | 510  | 27 | 0.050 | 320  | 312 | 0.491 |
| 597501 | 4  | 106183003 | 106183003 | C     | T | SNP | TET2            | ENST00000380013 | 1  | nonsense                    | c.4042        | p.Q1348*  | tier1 | 283  | 12 | 0.041 | 104  | 112 | 0.516 |
| 597501 | 4  | 109773495 | 109773495 | C     | T | SNP | COL25A1         | ENST00000399132 | -1 | intronic                    | c.1345-59     | e25-59    | tier3 | 68   | 2  | 0.029 | 42   | 33  | 0.440 |
| 597501 | 4  | 115544516 | 115544516 | T     | C | SNP | UGT8            | ENST00000310836 | 1  | silent                      | c.480         | p.T160    | tier1 | 120  | 0  | 0.000 | 79   | 54  | 0.406 |
| 597501 | 5  | 31435975  | 31435975  | C     | A | SNP | DROSHA          | ENST00000344624 | -1 | splice_region               | c.2943-4      | e22-4     | tier3 | 45   | 1  | 0.021 | 41   | 13  | 0.241 |
| 597501 | 5  | 140203381 | 140203381 | C     | T | SNP | PCDHA5          | ENST00000529859 | 1  | missense                    | c.2021        | p.A674V   | tier1 | 489  | 0  | 0.000 | 598  | 21  | 0.034 |
| 597501 | 6  | 29069942  | 29069942  | G     | A | SNP | OR2B3           | ENST00000377173 | -1 | 5_prime_flanking_region     | c.-14917      | NULL      | tier3 | 44   | 0  | 0.000 | 12   | 17  | 0.586 |
| 597501 | 6  | 41166075  | 41166075  | C     | T | SNP | TREML2          | ENST00000483722 | -1 | missense                    | c.148         | p.V50M    | tier1 | 117  | 0  | 0.000 | 216  | 17  | 0.073 |
| 597501 | 6  | 42330640  | 42330640  | C     | T | SNP | TRERF1          | ENST00000541110 | -1 | intronic                    | c.1+95        | e0+95     | tier3 | 57   | 3  | 0.050 | 55   | 56  | 0.500 |
| 597501 | 6  | 123702474 | 123702474 | A     | - | DEL | TRDN            | ENST00000398178 | -1 | intronic                    | c.1186+41     | e16+41    | tier3 | 48   | 0  | 0.000 | 44   | 8   | 0.154 |
| 597501 | 6  | 136429913 | 136429913 | C     | T | SNP | PDE7B           | ENST00000308191 | 1  | missense                    | c.127         | p.R43C    | tier1 | 126  | 0  | 0.000 | 154  | 73  | 0.322 |
| 597501 | 6  | 139237014 | 139237014 | C     | T | SNP | REPS1           | ENST00000450536 | -1 | silent                      | c.1701        | p.R567    | tier1 | 142  | 4  | 0.027 | 113  | 78  | 0.408 |
| 597501 | 6  | 163990584 | 163990584 | A     | G | SNP | QKI             | ENST00000275262 | 1  | 3_prime_untranslated_region | c.*4842       | NULL      | tier3 | 64   | 1  | 0.015 | 29   | 37  | 0.561 |
| 597501 | 7  | 131122618 | 131122618 | T     | G | SNP | MKLN1           | ENST00000352689 | 1  | silent                      | c.1035        | p.R345    | tier1 | 121  | 6  | 0.047 | 59   | 58  | 0.496 |
| 597501 | 8  | 3045393   | 3045393   | G     | A | SNP | CSMD1           | ENST00000520002 | -1 | missense                    | c.5621        | p.S1874L  | tier1 | 338  | 11 | 0.031 | 282  | 234 | 0.453 |
| 597501 | 8  | 7878120   | 7878120   | C     | T | SNP | FAM90A24P       | ENST00000400118 | -1 | 5_prime_untranslated_region | c.-7878120    | NULL      | tier3 | 2001 | 5  | 0.003 | 3019 | 225 | 0.069 |
| 597501 | 8  | 12516668  | 12516668  | C     | T | SNP | RPS3AP35        | ENST00000478386 | -1 | 5_prime_flanking_region     | c.-29903      | NULL      | tier2 | 48   | 2  | 0.040 | 42   | 26  | 0.382 |
| 597501 | 8  | 99443925  | 99443926  | -     | A | INS | KCNS2           | ENST00000287042 | 1  | 3_prime_untranslated_region | c.*2284       | NULL      | tier3 | 62   | 0  | 0.000 | 61   | 13  | 0.176 |
| 597501 | 9  | 116079186 | 116079186 | C     | T | SNP | WDR31           | ENST00000374193 | -1 | missense                    | c.947         | p.C316Y   | tier1 | 59   | 2  | 0.033 | 59   | 60  | 0.504 |
| 597501 | 9  | 130693095 | 130693095 | C     | - | DEL | ST6GALNAC6      | ENST00000291839 | -1 | 5_prime_flanking_region     | c.-32835      | NULL      | tier2 | 17   | 0  | 0.000 | 14   | 16  | 0.533 |
| 597501 | 10 | 49447649  | 49447649  | G     | A | SNP | FRMPD2          | ENST00000374201 | -1 | missense                    | c.787         | p.R263C   | tier1 | 78   | 4  | 0.049 | 76   | 73  | 0.490 |
| 597501 | 10 | 135015401 | 135015401 | C     | T | SNP | KNDC1           | ENST00000368572 | 1  | missense                    | c.3392        | p.P1131L  | tier1 | 48   | 3  | 0.059 | 30   | 32  | 0.516 |
| 597501 | 11 | 31531364  | 31531364  | C     | T | SNP | ELP4            | ENST00000395934 | 1  | silent                      | c.33          | p.A11     | tier1 | 53   | 0  | 0.000 | 78   | 16  | 0.170 |
| 597501 | 12 | 117715866 | 117715866 | C     | A | SNP | NOS1            | ENST00000317775 | -1 | missense                    | c.1562        | p.R521L   | tier1 | 111  | 7  | 0.059 | 119  | 87  | 0.422 |
| 597501 | 13 | 25060389  | 25060389  | G     | A | SNP | PARP4           | ENST00000381989 | -1 | silent                      | c.1269        | p.T423    | tier1 | 109  | 4  | 0.035 | 59   | 56  | 0.487 |
| 597501 | 14 | 25100251  | 25100251  | G     | A | SNP | GZMB            | ENST00000382542 | -1 | 3_prime_untranslated_region | c.*26         | NULL      | tier3 | 131  | 3  | 0.022 | 95   | 77  | 0.448 |
| 597501 | 14 | 86089071  | 86089071  | C     | G | SNP | FLRT2           | ENST00000330753 | 1  | missense                    | c.1213        | p.L405V   | tier1 | 876  | 37 | 0.041 | 572  | 537 | 0.484 |
| 597501 | 15 | 34651895  | 34651895  | C     | T | SNP | LPCAT4          | ENST00000314891 | -1 | missense                    | c.1294        | p.G432S   | tier1 | 96   | 2  | 0.020 | 94   | 63  | 0.401 |
| 597501 | 15 | 91574882  | 91574882  | T     | A | SNP | LOC101926911    | ENST00000557804 | 1  | intronic                    | c.NULL        | NULL      | tier3 | 84   | 4  | 0.046 | 48   | 18  | 0.273 |
| 597501 | 16 | 2522630   | 2522630   | G     | A | SNP | NTN3            | ENST00000293973 | 1  | missense                    | c.928         | p.A310T   | tier1 | 17   | 0  | 0.000 | 21   | 15  | 0.417 |
| 597501 | 17 | 8397209   | 8397209   | T     | - | DEL | MYH10           | ENST00000488329 | -1 | 5_prime_untranslated_region | c.-8397209    | NULL      | tier3 | 79   | 0  | 0.000 | 63   | 9   | 0.125 |
| 597501 | 17 | 11532944  | 11532944  | C     | T | SNP | DNAH9           | ENST00000262442 | 1  | intronic                    | c.1518+43     | e7+43     | tier3 | 533  | 1  | 0.002 | 873  | 42  | 0.046 |
| 597501 | 17 | 28900664  | 28900664  | C     | T | SNP | LOC101927093    | ENST00000436477 | -1 | rna                         | NULL          | NULL      | tier1 | 112  | 3  | 0.026 | 71   | 81  | 0.533 |
| 597501 | 17 | 29422352  | 29422352  | T     | G | SNP | NF1             | ENST00000358273 | 1  | missense                    | c.25          | p.W9G     | tier1 | 339  | 1  | 0.003 | 323  | 63  | 0.163 |
| 597501 | 17 | 30219342  | 30219342  | C     | G | SNP | UTP6            | ENST00000261708 | -1 | missense                    | c.361         | p.A121P   | tier1 | 138  | 2  | 0.014 | 58   | 37  | 0.390 |
| 597501 | 17 | 57647955  | 57647959  | TGAAG | - | DEL | DHX40           | ENST00000251241 | 1  | frame_shift_del             | c.357_361     | p.E120fs  | tier1 | 103  | 0  | 0.000 | 55   | 24  | 0.304 |
| 597501 | 17 | 74732959  | 74732959  | G     | T | SNP | SRSF2           | ENST00000359995 | -1 | missense                    | c.284         | p.P95H    | tier1 | 335  | 11 | 0.032 | 292  | 273 | 0.481 |
| 597501 | 18 | 29523048  | 29523048  | C     | T | SNP | ENSG00000263823 | ENST00000580420 | 1  | rna                         | NULL          | NULL      | tier1 | 170  | 6  | 0.034 | 123  | 107 | 0.465 |
| 597501 | 19 | 17440815  | 17440815  | G     | A | SNP | ANO8            | ENST00000159087 | -1 | missense                    | c.1282        | p.R428W   | tier1 | 66   | 0  | 0.000 | 89   | 17  | 0.160 |
| 597501 | 19 | 47884624  | 47884624  | G     | A | SNP | DHX34           | ENST00000486327 | 1  | 3_prime_untranslated_region | c.*47884624   | NULL      | tier3 | 47   | 0  | 0.000 | 42   | 27  | 0.386 |
| 597501 | 19 | 54080590  | 54080590  | T     | C | SNP | ZNF331          | ENST00000253144 | 1  | missense                    | c.776         | p.I259T   | tier1 | 115  | 0  | 0.000 | 54   | 60  | 0.526 |
| 597501 | 20 | 48098486  | 48098486  | G     | A | SNP | KCNB1           | ENST00000371741 | -1 | silent                      | c.532         | p.L178    | tier1 | 37   | 0  | 0.000 | 40   | 45  | 0.529 |
| 597501 | X  | 10084387  | 10084387  | T     | C | SNP | WWC3            | ENST00000380861 | 1  | intronic                    | c.975-71      | e9-71     | tier3 | 143  | 1  | 0.007 | 82   | 72  | 0.468 |
| 597501 | X  | 70357542  | 70357542  | C     | T | SNP | MED12           | ENST00000333646 | 1  | intronic                    | c.5836-34     | e41-34    | tier3 | 446  | 24 | 0.051 | 379  | 379 | 0.499 |
| 621996 | 1  | 4772000   | 4772000   | C     | A | SNP | AJAP1           | ENST00000378190 | 1  | missense                    | c.70          | p.H24N    | tier1 | 15   | 0  | 0.000 | 16   | 14  | 0.467 |
| 621996 | 1  | 91404719  | 91404719  | T     | C | SNP | ZNF644          | ENST00000337393 | -1 | missense                    | c.2192        | p.N731S   | tier1 | 67   | 3  | 0.043 | 71   | 41  | 0.366 |
| 621996 | 1  | 152186038 | 152186038 | A     | - | DEL | HRNR            | ENST00000368801 | -1 | frame_shift_del             | c.8067        | p.H2690fs |       |      |    |       |      |     |       |

|        |    |           |           |              |     |          |                 |                 |        |                             |                 |                       |       |      |       |       |      |       |       |
|--------|----|-----------|-----------|--------------|-----|----------|-----------------|-----------------|--------|-----------------------------|-----------------|-----------------------|-------|------|-------|-------|------|-------|-------|
| 621996 | 2  | 166223736 | 166223736 | G            | A   | SNP      | SCN2A           | ENST00000283256 | 1      | missense                    | c.3530          | p.R1177Q              | tier1 | 156  | 1     | 0.006 | 179  | 97    | 0.351 |
| 621996 | 2  | 179604342 | 179604342 | C            | T   | SNP      | TTN             | ENST00000342175 | -1     | missense                    | c.13105         | p.V4369M              | tier1 | 51   | 3     | 0.056 | 29   | 34    | 0.540 |
| 621996 | 2  | 197709191 | 197709191 | T            | C   | SNP      | PGAP1           | ENST00000354764 | -1     | intronic                    | c.2337+57       | e24+57                | tier3 | 219  | 0     | 0.000 | 234  | 111   | 0.320 |
| 621996 | 3  | 38291377  | 38291377  | G            | A   | SNP      | OXSR1           | ENST00000311806 | 1      | intronic                    | c.1323-80       | e15-80                | tier3 | 79   | 0     | 0.000 | 79   | 28    | 0.262 |
| 621996 | 3  | 50312255  | 50312255  | G            | G   | SNP      | SEMA3B          | ENST00000416295 | 1      | 3_prime_untranslated_region | c.*50312255     | NULL                  | tier2 | 46   | 2     | 0.042 | 58   | 30    | 0.341 |
| 621996 | 3  | 125879686 | 125879686 | C            | A   | SNP      | ALDH1L1         | ENST00000393434 | -1     | splice_region               | c.127+10        | e1+10                 | tier3 | 66   | 0     | 0.000 | 81   | 36    | 0.308 |
| 621996 | 4  | 125592366 | 125592366 | T            | G   | SNP      | ANKRD50         | ENST00000504087 | -1     | missense                    | c.2066          | p.H689P               | tier1 | 35   | 0     | 0.000 | 24   | 16    | 0.400 |
| 621996 | 5  | 133483867 | 133483867 | T            | G   | SNP      | TCF7            | ENST00000395023 | 1      | 3_prime_untranslated_region | c.*1873         | NULL                  | tier3 | 116  | 3     | 0.025 | 128  | 78    | 0.379 |
| 621996 | 5  | 154255096 | 154255096 | C            | A   | SNP      | CNOT8           | ENST00000285896 | 1      | 3_prime_untranslated_region | c.*97           | NULL                  | tier3 | 66   | 1     | 0.015 | 78   | 33    | 0.297 |
| 621996 | 5  | 176012012 | 176012012 | C            | A   | SNP      | CDHR2           | ENST00000261944 | 1      | missense                    | c.2730          | p.N910K               | tier1 | 123  | 4     | 0.031 | 126  | 65    | 0.340 |
| 621996 | 5  | 176016191 | 176016191 | C            | T   | SNP      | CDHR2           | ENST00000261944 | 1      | splice_region               | c.3008+8        | e21+8                 | tier3 | 94   | 0     | 0.000 | 89   | 69    | 0.437 |
| 621996 | 6  | 36569780  | 36569780  | A            | G   | SNP      | SRSF3           | ENST00000373715 | 1      | 3_prime_untranslated_region | c.*14           | NULL                  | tier3 | 38   | 0     | 0.000 | 35   | 17    | 0.321 |
| 621996 | 7  | 48964818  | 48964818  | G            | A   | SNP      | ENSG00000218305 | ENST00000406468 | 1      | 3_prime_untranslated_region | c.*48964818     | NULL                  | tier2 | 184  | 0     | 0.000 | 142  | 66    | 0.317 |
| 621996 | 7  | 100846447 | 100846447 | C            | T   | SNP      | DGAT2L7P        | ENST00000379421 | -1     | 5_prime_untranslated_region | c.-100846447    | NULL                  | tier2 | 57   | 0     | 0.000 | 83   | 49    | 0.371 |
| 621996 | 7  | 112724366 | 112724366 | C            | T   | SNP      | GPR85           | ENST00000297146 | -1     | silent                      | c.411           | p.T137                | tier1 | 60   | 0     | 0.000 | 61   | 36    | 0.371 |
| 621996 | 8  | 3224668   | 3224668   | C            | T   | SNP      | CSMD1           | ENST00000520002 | -1     | missense                    | c.3004          | p.G1002R              | tier1 | 558  | 11    | 0.019 | 517  | 311   | 0.375 |
| 621996 | 9  | 141071154 | 141071154 | T            | C   | SNP      | TUBBP5          | ENST00000290377 | 1      | rna                         | NULL            | NULL                  | tier1 | 178  | 1     | 0.006 | 245  | 19    | 0.072 |
| 621996 | 11 | 6243580   | 6243580   | G            | A   | SNP      | FAM160A2        | ENST00000265978 | -1     | intronic                    | c.1191+92       | e5+92                 | tier3 | 59   | 2     | 0.033 | 60   | 43    | 0.418 |
| 621996 | 11 | 24750764  | 24750764  | C            | T   | SNP      | LUZP2           | ENST00000336930 | 1      | nonsense                    | c.112           | p.R38*                | tier1 | 107  | 4     | 0.036 | 91   | 64    | 0.413 |
| 621996 | 11 | 46404356  | 46404356  | G            | A   | SNP      | MDK             | ENST00000489525 | 1      | missense                    | c.464           | p.R155H               | tier1 | 36   | 1     | 0.021 | 43   | 19    | 0.247 |
| 621996 | 11 | 116718092 | 116718092 | C            | T   | SNP      | SIK3            | ENST00000375300 | -1     | intronic                    | c.3808+100      | e22+100               | tier3 | 35   | 0     | 0.000 | 37   | 21    | 0.362 |
| 621996 | 12 | 113405327 | 113405327 | C            | T   | SNP      | OAS3            | ENST00000228928 | 1      | missense                    | c.2794          | p.R932W               | tier1 | 28   | 1     | 0.035 | 37   | 24    | 0.393 |
| 621996 | 12 | 123005987 | 123005988 | -            | A   | INS      | RSRC2           | ENST00000331738 | -1     | intronic                    | c.164-13_164-12 | e3-12                 | tier3 | 53   | 0     | 0.000 | 57   | 23    | 0.288 |
| 621996 | 12 | 123419982 | 123419982 | G            | A   | SNP      | ABCB9           | ENST00000442028 | -1     | splice_region               | c.1744-4        | e9-4                  | tier3 | 38   | 1     | 0.026 | 57   | 36    | 0.387 |
| 621996 | 14 | 24887568  | 24887568  | C            | G   | SNP      | NYNRIN          | ENST00000382554 | 1      | 3_prime_untranslated_region | c.*916          | NULL                  | tier3 | 94   | 1     | 0.011 | 58   | 37    | 0.390 |
| 621996 | 14 | 63269293  | 63269293  | A            | G   | SNP      | KCNH5           | ENST00000322893 | -1     | missense                    | c.1576          | p.S526P               | tier1 | 38   | 0     | 0.000 | 44   | 33    | 0.429 |
| 621996 | 15 | 90631934  | 90631934  | C            | T   | SNP      | IDH2            | ENST00000330062 | -1     | missense                    | c.419           | p.R140Q               | tier1 | 422  | 0     | 0.000 | 475  | 258   | 0.351 |
| 621996 | 15 | 102294753 | 102294753 | T            | C   | SNP      | DNM1P47         | ENST00000561463 | 1      | rna                         | NULL            | NULL                  | tier1 | 34   | 1     | 0.029 | 41   | 18    | 0.305 |
| 621996 | 16 | 22545618  | 22545629  | TCCACCCTCAGC | -   | DEL      | NPIP5           | ENST00000424340 | 1      | in_frame_del                | c.1314_1325     | p.APPS442in_frame_del | tier1 | 17   | 0     | 0.000 | 22   | 12    | 0.353 |
| 621996 | 16 | 33585853  | 33585853  | C            | T   | SNP      | ENSG00000271178 | ENST00000562905 | 1      | 5_prime_flanking_region     | c.-43828        | NULL                  | tier3 | 107  | 0     | 0.000 | 204  | 16    | 0.072 |
| 621996 | 16 | 33585887  | 33585887  | T            | C   | SNP      | ENSG00000271178 | ENST00000562905 | 1      | 5_prime_flanking_region     | c.-43794        | NULL                  | tier3 | 134  | 0     | 0.000 | 240  | 16    | 0.063 |
| 621996 | 17 | 12921348  | 12921348  | ELAC2        | C   | SNP      | ELAC2           | ENST00000338034 | -1     | 5_prime_untranslated_region | c.-84           | NULL                  | tier2 | 9    | 0     | 0.000 | 5    | 9     | 0.643 |
| 621996 | 17 | 45249355  | 45249355  | A            | G   | SNP      | CDC27           | ENST00000531206 | -1     | missense                    | c.179           | p.L60P                | tier1 | 57   | 1     | 0.017 | 73   | 36    | 0.327 |
| 621996 | 17 | 74732959  | 74732959  | G            | T   | SNP      | SRSF2           | ENST00000359995 | -1     | missense                    | c.284           | p.P95H                | tier1 | 199  | 5     | 0.025 | 271  | 169   | 0.384 |
| 621996 | 18 | 55024279  | 55024279  | A            | C   | SNP      | ST8SIA3         | ENST00000324000 | 1      | silent                      | c.438           | p.S146                | tier1 | 85   | 1     | 0.012 | 59   | 42    | 0.416 |
| 621996 | 19 | 52726744  | 52726744  | G            | A   | SNP      | PPP2R1A         | ENST00000322088 | 1      | intronic                    | c.1661+1250     | e13+1250              | tier4 | 41   | 2     | 0.047 | 34   | 20    | 0.370 |
| 621996 | 20 | 29623180  | 29623180  | T            | C   | SNP      | FRG1B           | ENST00000482423 | 1      | rna                         | NULL            | NULL                  | tier1 | 1531 | 18    | 0.012 | 2465 | 72    | 0.028 |
| 621996 | 20 | 31022441  | 31022442  | -            | G   | INS      | ASXL1           | ENST00000375687 | 1      | frame_shift_ins             | c.1926_1927     | p.G645fs              | tier1 | 693  | 14    | 0.020 | 805  | 301   | 0.272 |
| 621996 | 21 | 36259149  | 36259158  | GATGGGCAGG   | -   | DEL      | RUNX1           | ENST00000300305 | -1     | frame_shift_del             | c.342_333       | p.P113fs              | tier1 | 795  | 9     | 0.011 | 772  | 132   | 0.146 |
| 621996 | 22 | 20172250  | 20172250  | G            | A   | SNP      | LINC00896       | ENST00000423736 | 1      | 5_prime_flanking_region     | c.-21850        | NULL                  | tier3 | 82   | 0     | 0.000 | 59   | 33    | 0.359 |
| 621996 | X  | 123205158 | 123205159 | -            | AT  | INS      | STAG2           | ENST00000218089 | 1      | frame_shift_ins             | c.2518_2519     | p.N841fs              | tier1 | 189  | 0     | 0.000 | 127  | 180   | 0.586 |
| 621996 | X  | 151092940 | 151092940 | G            | A   | SNP      | MAGEA4          | ENST00000276344 | 1      | silent                      | c.804           | p.A268                | tier1 | 99   | 2     | 0.020 | 65   | 43    | 0.398 |
| 621996 | Y  | 14077927  | 14077927  | C            | T   | SNP      | MXRA5P1         | ENST00000420610 | 1      | 3_prime_untranslated_region | c.*14077927     | NULL                  | tier2 | 42   | 0     | 0.000 | 31   | 46    | 0.597 |
| 624702 | 1  | 143914212 | 143914212 | T            | A   | SNP      | SRGAP2P2        | ENST00000494534 | 1      | 3_prime_untranslated_region | c.*143914212    | NULL                  | tier3 | 23   | 0     | 0.000 | 117  | 83    | 0.407 |
| 624702 | 1  | 156043138 | 156043138 | A            | C   | SNP      | LMNA            | ENST00000368300 | 1      | 5_prime_flanking_region     | c.-41572        | NULL                  | tier3 | 83   | 1     | 0.012 | 129  | 78    | 0.375 |
| 624702 | 1  | 158057760 | 158057760 | G            | A   | SNP      | KIRREL          | ENST00000368173 | 1      | intronic                    | c.768-36        | e7-36                 | tier2 | 29   | 1     | 0.033 | 138  | 74    | 0.349 |
| 624702 | 1  | 201868536 | 201868536 | T            | G   | SNP      | LMOD1           | ENST00000367288 | -1     | silent                      | c.1605          | p.P535                | tier1 | 60   | 0     | 0.000 | 159  | 21    | 0.115 |
| 624702 | 1  | 214204427 | 214204427 | C            | T   | SNP      | PROX1           | ENST00000261454 | 1      | intronic                    | c.2029-4565     | e4-4565               | tier3 | 15   | 0     | 0.000 | 39   | 23    | 0.365 |
| 624702 | 2  | 133403009 | 133403009 | C            | T   | SNP      | GPR39           | ENST00000329321 | 1      | missense                    | c.1192          | p.R398C               | tier1 | 26   | 0     | 0.000 | 74   | 34    | 0.315 |
| 624702 | 2  | 179454700 | 179454700 | C            | T   | SNP      | TTN             | ENST00000342175 | -1     | silent                      | c.35133         | p.E11711              | tier1 | 149  | 4     | 0.026 | 156  | 102   | 0.394 |
| 624702 | 2  | 187627370 | 187627370 | G            | T   | SNP      | FAM171B         | ENST00000304698 | 1      | silent                      | c.2301          | p.G767                | tier1 | 46   | 0     | 0.000 | 81   | 39    | 0.325 |
| 624702 | 2  | 238287631 | 238287631 | C            | T   | SNP      | COL6A3          | ENST00000295550 | -1     | silent                      | c.2145          | p.S715                | tier1 | 21   | 0     | 0.000 | 60   | 29    | 0.326 |
| 624702 | 3  | 9747109   | 9747109   | A            | C   | SNP      | CPNE9           | ENST00000383832 | 1      | intronic                    | c.261-39        | e5-39                 | tier3 | 157  | 1     | 0.006 | 515  | 43    | 0.076 |
| 624702 | 3  | 51312620  | 51312620  | G            | A   | SNP      | DOCK3           | ENST00000266037 | 1      | missense                    | c.2659          | p.V887I               | tier1 | 29   | 0     | 0.000 | 59   | 33    | 0.355 |
| 624702 | 4  | 2951749   | 2951749   | C            | A   | SNP      | NOP14           | ENST00000416614 | -1     | missense                    | c.1194          | p.E398D               | tier1 | 47   | 4     | 0.078 | 96   | 60    | 0.382 |
| 624702 | 4  | 76711225  | 76711225  | T            | A   | SNP      | USO1            | ENST00000538159 | 1      | intronic                    | c.1003-78       | e11-78                | tier3 | 50   | 0     | 0.000 | 22   | 8     | 0.070 |
| 624702 | 4  | 106157711 | 106157712 | -            | T   | INS      | TET2            | ENST00000380013 | 1      | frame_shift_ins             | c.2612_2613     | p.V872fs              | tier1 | 57   | 2     | 0.034 | 39   | 68    | 0.636 |
| 624702 | 5  | 80368977  | 80368977  | T            | C   | SNP      | RASGRF2         | ENST00000265080 | 1      | intronic                    | c.634-41        | e5-41                 | tier3 | 64   | 1     | 0.015 | 92   | 61    | 0.396 |
| 624702 | 5  | 102503818 | 102503818 | G            | A   | SNP      | PPIP5K2         | ENST00000451606 | 1      | missense                    | c.2105          | p.R702H               | tier1 | 306  | 9     | 0.029 | 202  | 123   | 0.379 |
| 624702 | 5  | 139505517 | 139505517 | T            | G   | SNP      | CYSTM1          | ENST00000261811 | 1      | 5_prime_flanking_region     | c.-68534        | NULL                  | tier3 | 102  | 7     | 0.064 | 62   | 55    | 0.470 |
| 624702 | 5  | 140564550 | 140564550 | C            | T   | SNP      | PCDHB16         | ENST00000361016 | 1      | 3_prime_untranslated_region | c.*85           | NULL                  | tier2 | 64   | 2     | 0.030 | 99   | 64    | 0.390 |
| 624702 | 5  | 159901462 | 159901463 | CT           | -   | DEL      | MIR146A         | ENST00000517927 | 1      | intronic                    | c.NULL          | NULL                  | tier3 | 42   | 0     | 0.000 | 100  | 25    | 0.200 |
| 624702 | 6  | 35936771  | 35936771  | C            | T   | SNP      | SLC26A8         | ENST00000466805 | -1     | 5_prime_untranslated_region | c.-35936771     | NULL                  | tier3 | 43   | 0     | 0.000 | 104  | 72    | 0.409 |
| 624702 | 6  | 109830321 | 109830321 | G            | A   | SNP      | AKD1            | ENST00000424296 | -1     | intronic                    | c.4481+61       | e32+61                | tier3 | 69   | 0     | 0.000 | 95   | 69    | 0.421 |
| 624702 | 7  | 6031678   | 6031678   | A            | G   | SNP      | PMS2            | ENST00000265849 | -1     | missense                    | c.914           | p.L305P               | tier1 | 98   | 5     | 0.049 | 153  | 92    | 0.376 |
| 624702 | 7  | 158200082 | 158200082 | G            | A   | SNP      | PTPRN2          | ENST00000404321 | -1     | intronic                    | c.232+82345     | e2+82345              | tier3 | 18   | 0     | 0.000 | 135  | 54    | 0.281 |
| 624702 | 8  | 7698557   | 7698557   | A            | SNP | DEFB104A | ENST00000314265 | 1               | silent | c.60                        | p.V20           | tier1                 | 114   | 0    | 0.000 | 228   | 47   | 0.168 |       |
| 624702 | 8  | 10467587  | 10467587  | T            | C   | SNP      | RP1L1           | ENST00000382483 | -1     | missense                    | c.4021          | p.T1341A              | tier1 | 134  | 1     | 0.007 | 263  | 22    | 0.076 |
| 62     |    |           |           |              |     |          |                 |                 |        |                             |                 |                       |       |      |       |       |      |       |       |

|        |    |           |           |         |  |       |     |                        |                 |    |                             |                     |           |       |     |    |       |      |     |       |
|--------|----|-----------|-----------|---------|--|-------|-----|------------------------|-----------------|----|-----------------------------|---------------------|-----------|-------|-----|----|-------|------|-----|-------|
| 624702 | 14 | 50789470  | 50789470  | G       |  | T     | SNP | <i>ATP5S</i>           | ENST00000426751 | 1  | missense                    | c.394               | p.A132S   | tier1 | 36  | 2  | 0.053 | 58   | 38  | 0.396 |
| 624702 | 15 | 93568489  | 93568490  | -       |  | TGT   | INS | <i>CHD2</i>            | ENST00000394196 | 1  | 3_prime_untranslated_region | c.*554              | NULL      | tier3 | 141 | 0  | 0.000 | 326  | 120 | 0.269 |
| 624702 | 17 | 74732959  | 74732959  | G       |  | T     | SNP | <i>SRSF2</i>           | ENST00000392485 | -1 | missense                    | c.284               | p.P95H    | tier1 | 72  | 2  | 0.027 | 275  | 158 | 0.364 |
| 624702 | 19 | 6678085   | 6678085   | A       |  | G     | SNP | <i>C3</i>              | ENST00000245907 | -1 | intronic                    | c.4851-51           | e41-51    | tier3 | 16  | 0  | 0.000 | 68   | 34  | 0.330 |
| 624702 | 19 | 10800503  | 10800506  | AAAT    |  | -     | DEL | <i>ILF3</i>            | ENST00000449870 | 1  | 3_prime_untranslated_region | c.*515              | NULL      | tier3 | 98  | 2  | 0.020 | 155  | 60  | 0.279 |
| 624702 | 19 | 42861028  | 42861028  | C       |  | T     | SNP | <i>MEGF8</i>           | ENST00000251268 | 1  | silent                      | c.4725              | p.P1575   | tier1 | 94  | 6  | 0.060 | 420  | 286 | 0.401 |
| 624702 | 20 | 1350154   | 1350154   | T       |  | G     | SNP | <i>FKBP1A</i>          | ENST00000400137 | -1 | 3_prime_untranslated_region | c.*2602             | NULL      | tier3 | 121 | 2  | 0.016 | 188  | 30  | 0.136 |
| 624702 | 20 | 18744043  | 18744043  | A       |  | G     | SNP | <i>DTD1</i>            | ENST00000377452 | 1  | 3_prime_untranslated_region | c.*19147            | NULL      | tier3 | 96  | 3  | 0.030 | 104  | 69  | 0.390 |
| 624702 | 20 | 44505588  | 44505588  | C       |  | T     | SNP | <i>ZSWIM3</i>          | ENST00000255152 | 1  | nonsense                    | c.391               | p.Q131*   | tier1 | 28  | 1  | 0.035 | 85   | 61  | 0.412 |
| 624702 | 21 | 27253248  | 27253248  | T       |  | C     | SNP | <i>APP</i>             | ENST00000346798 | -1 | 3_prime_untranslated_region | c.*733              | NULL      | tier3 | 152 | 1  | 0.007 | 295  | 24  | 0.075 |
| 624702 | 22 | 20715828  | 20715828  | C       |  | G     | SNP | <i>ENSG00000188280</i> | ENST00000434783 | 1  | intronic                    | c.NULL              | NULL      | tier2 | 30  | 0  | 0.000 | 218  | 50  | 0.185 |
| 624702 | 22 | 24176559  | 24176559  | A       |  | C     | SNP | <i>SMARCB1</i>         | ENST00000263121 | 1  | 3_prime_untranslated_region | c.*192              | NULL      | tier3 | 85  | 0  | 0.000 | 157  | 18  | 0.102 |
| 624702 | 22 | 38341047  | 38341047  | A       |  | G     | SNP | <i>C22orf23</i>        | ENST00000249079 | -1 | splice_site                 | c.481+2             | e4+2      | tier1 | 38  | 0  | 0.000 | 105  | 56  | 0.348 |
| 624702 | X  | 123176411 | 123176411 | A       |  | G     | SNP | <i>STAG2</i>           | ENST00000218089 | 1  | splice_region               | c.386-8             | e5-8      | tier3 | 142 | 0  | 0.000 | 117  | 253 | 0.682 |
| 624702 | X  | 153214721 | 153214721 | T       |  | G     | SNP | <i>HCFC1</i>           | ENST00000310441 | -1 | 3_prime_untranslated_region | c.*77               | NULL      | tier3 | 27  | 0  | 0.000 | 74   | 23  | 0.232 |
| 625338 | 17 | 21562303  | 21562303  | A       |  | T     | SNP | <i>ENSG00000264617</i> | ENST00000584107 | -1 | 5_prime_untranslated_region | c.-21562303         | NULL      | tier3 | 193 | 0  | 0.000 | 242  | 17  | 0.066 |
| 625338 | 20 | 31022824  | 31022824  | C       |  | G     | SNP | <i>ASXL1</i>           | ENST00000375687 | 1  | nonsense                    | c.2309              | p.S770*   | tier1 | 591 | 1  | 0.002 | 1201 | 40  | 0.032 |
| 625338 | 21 | 36231782  | 36231782  | C       |  | T     | SNP | <i>RUNX1</i>           | ENST00000300305 | -1 | missense                    | c.602               | p.R201Q   | tier1 | 786 | 2  | 0.003 | 1092 | 28  | 0.025 |
| 625338 | 21 | 36252865  | 36252865  | C       |  | T     | SNP | <i>RUNX1</i>           | ENST00000300305 | -1 | missense                    | c.497               | p.R166Q   | tier1 | 984 | 0  | 0.000 | 1534 | 46  | 0.029 |
| 627844 | 1  | 240073885 | 240073885 | A       |  | -     | DEL | <i>CHRM3</i>           | ENST00000255380 | 1  | 3_prime_untranslated_region | c.*1361             | NULL      | tier3 | 71  | 0  | 0.000 | 109  | 16  | 0.128 |
| 627844 | 2  | 10224073  | 10224073  | G       |  | A     | SNP | <i>ENSG00000233502</i> | ENST00000425235 | 1  | splice_site                 | c.165+1             | e1+1      | tier1 | 120 | 0  | 0.000 | 119  | 51  | 0.298 |
| 627844 | 2  | 87754980  | 87754981  | -       |  | T     | INS | <i>LINC00152</i>       | ENST00000331944 | 1  | rna                         | NULL                | NULL      | tier1 | 42  | 0  | 0.000 | 74   | 13  | 0.149 |
| 627844 | 3  | 31674390  | 31674390  | A       |  | T     | SNP | <i>STT3B</i>           | ENST00000295770 | 1  | intronic                    | c.2188-37           | e15-37    | tier3 | 90  | 0  | 0.000 | 140  | 56  | 0.286 |
| 627844 | 3  | 49036909  | 49036910  | -       |  | C     | INS | <i>P4HTM</i>           | ENST00000343546 | 1  | intronic                    | c.437-1962_437-1961 | e3-1961   | tier3 | 76  | 2  | 0.026 | 81   | 29  | 0.264 |
| 627844 | 3  | 122432409 | 122432409 | A       |  | G     | SNP | <i>PARP14</i>          | ENST00000474629 | 1  | missense                    | c.3758              | p.N1253S  | tier1 | 97  | 0  | 0.000 | 169  | 71  | 0.296 |
| 627844 | 4  | 20530641  | 20530641  | G       |  | A     | SNP | <i>SLIT2</i>           | ENST00000504154 | 1  | missense                    | c.1532              | p.R511H   | tier1 | 124 | 0  | 0.000 | 173  | 15  | 0.080 |
| 627844 | 6  | 69795034  | 69795034  | C       |  | T     | SNP | <i>BAI3</i>            | ENST00000370598 | 1  | intronic                    | c.2480+9104         | e15+9104  | tier3 | 74  | 0  | 0.000 | 87   | 38  | 0.304 |
| 627844 | 6  | 87968388  | 87968395  | AGTTGGT |  | -     | DEL | <i>ZNF292</i>          | ENST00000369577 | 1  | frame_shift_del             | c.5041_5048         | p.S1681fs | tier1 | 78  | 0  | 0.000 | 163  | 30  | 0.155 |
| 627844 | 6  | 135515531 | 135515531 | G       |  | A     | SNP | <i>MYB</i>             | ENST00000341911 | 1  | missense                    | c.881               | p.R294Q   | tier1 | 62  | 1  | 0.016 | 89   | 17  | 0.160 |
| 627844 | 6  | 146719968 | 146719968 | C       |  | T     | SNP | <i>GRM1</i>            | ENST00000282753 | 1  | missense                    | c.1793              | p.A598V   | tier1 | 111 | 1  | 0.009 | 121  | 59  | 0.326 |
| 627844 | 7  | 27236580  | 27236580  | G       |  | A     | SNP | <i>HOXA13</i>          | ENST00000222753 | -1 | 3_prime_untranslated_region | c.*1237             | NULL      | tier3 | 169 | 2  | 0.012 | 441  | 221 | 0.332 |
| 627844 | 7  | 80303472  | 80303472  | G       |  | A     | SNP | <i>CD36</i>            | ENST00000309881 | 1  | 3_prime_untranslated_region | c.*9                | NULL      | tier2 | 89  | 0  | 0.000 | 165  | 104 | 0.387 |
| 627844 | 8  | 82373788  | 82373788  | G       |  | A     | SNP | <i>FABP9</i>           | ENST00000379071 | -1 | 5_prime_untranslated_region | c.-30               | NULL      | tier3 | 50  | 0  | 0.000 | 86   | 29  | 0.252 |
| 627844 | 8  | 105503259 | 105503259 | C       |  | T     | SNP | <i>LRP12</i>           | ENST00000424843 | -1 | missense                    | c.2165              | p.R722H   | tier1 | 107 | 1  | 0.009 | 101  | 41  | 0.289 |
| 627844 | 10 | 120896686 | 120896686 | A       |  | -     | DEL | <i>FAM45A</i>          | ENST00000489936 | 1  | rna                         | NULL                | NULL      | tier1 | 129 | 0  | 0.000 | 306  | 20  | 0.061 |
| 627844 | 11 | 49839389  | 49839389  | G       |  | A     | SNP | <i>ENSG00000254487</i> | ENST00000532682 | 1  | 3_prime_untranslated_region | c.*49839389         | NULL      | tier2 | 217 | 0  | 0.000 | 276  | 25  | 0.083 |
| 627844 | 11 | 57268743  | 57268744  | -       |  | GGGT  | INS | <i>SLC43A1</i>         | ENST00000278426 | -1 | frame_shift_ins             | c.214_213           | p.Q71fs   | tier1 | 69  | 0  | 0.000 | 60   | 9   | 0.130 |
| 627844 | 11 | 57268744  | 57268745  | -       |  | CT    | INS | <i>SLC43A1</i>         | ENST00000278426 | -1 | frame_shift_ins             | c.213_212           | p.Q72fs   | tier1 | 69  | 0  | 0.000 | 60   | 9   | 0.130 |
| 627844 | 11 | 73980724  | 73980724  | A       |  | G     | SNP | <i>P4HA3</i>           | ENST00000331597 | -1 | silent                      | c.1440              | p.Y480    | tier1 | 52  | 0  | 0.000 | 39   | 20  | 0.339 |
| 627844 | 12 | 8186333   | 8186333   | G       |  | T     | SNP | <i>FOXJ2</i>           | ENST00000162391 | 1  | 5_prime_untranslated_region | c.-6096             | NULL      | tier2 | 81  | 1  | 0.012 | 90   | 14  | 0.135 |
| 627844 | 12 | 46231475  | 46231476  | -       |  | GACC  | INS | <i>ARID2</i>           | ENST00000334344 | 1  | frame_shift_ins             | c.1315_1316         | p.V439fs  | tier1 | 62  | 1  | 0.016 | 103  | 21  | 0.169 |
| 627844 | 12 | 64841839  | 64841839  | A       |  | G     | SNP | <i>XPOT</i>            | ENST00000332707 | 1  | intronic                    | c.2863-46           | e24-46    | tier3 | 86  | 0  | 0.000 | 167  | 15  | 0.082 |
| 627844 | 12 | 112185009 | 112185009 | C       |  | T     | SNP | <i>ACAD10</i>          | ENST00000546647 | 1  | 3_prime_untranslated_region | c.*112185009        | NULL      | tier3 | 68  | 0  | 0.000 | 82   | 20  | 0.196 |
| 627844 | 12 | 112884192 | 112884192 | C       |  | T     | SNP | <i>PTPN11</i>          | ENST00000351677 | 1  | missense                    | c.127               | p.L43F    | tier1 | 518 | 1  | 0.002 | 638  | 100 | 0.135 |
| 627844 | 12 | 133352961 | 133352961 | A       |  | G     | SNP | <i>GOLGA3</i>          | ENST00000204726 | -1 | intronic                    | c.3978+259          | e20+259   | tier3 | 144 | 2  | 0.014 | 144  | 18  | 0.107 |
| 627844 | 13 | 80095144  | 80095144  | T       |  | -     | DEL | <i>NDFIP2</i>          | ENST00000218652 | 1  | intronic                    | c.487+34            | e2+34     | tier3 | 68  | 1  | 0.015 | 115  | 19  | 0.142 |
| 627844 | 14 | 21679136  | 21679137  | -       |  | T     | INS | <i>HNRNPC</i>          | ENST00000553444 | -1 | 5_prime_untranslated_region | c.-21679136         | NULL      | tier3 | 103 | 2  | 0.019 | 183  | 50  | 0.215 |
| 627844 | 14 | 86088433  | 86088433  | T       |  | A     | SNP | <i>FLRT2</i>           | ENST00000330753 | 1  | missense                    | c.575               | p.I192N   | tier1 | 809 | 3  | 0.004 | 1009 | 202 | 0.167 |
| 627844 | 15 | 28805975  | 28805977  | AGG     |  | -     | DEL | <i>ENSG00000227717</i> | ENST00000419645 | 1  | 3_prime_untranslated_region | c.*28805975         | NULL      | tier4 | 41  | 0  | 0.000 | 70   | 15  | 0.177 |
| 627844 | 15 | 75798204  | 75798204  | G       |  | C     | SNP | <i>PTPN9</i>           | ENST00000306726 | -1 | silent                      | c.780               | p.P260    | tier1 | 162 | 1  | 0.006 | 217  | 23  | 0.096 |
| 627844 | 16 | 20563602  | 20563602  | G       |  | C     | SNP | <i>ACSM2B</i>          | ENST00000329697 | -1 | missense                    | c.758               | p.A253G   | tier1 | 127 | 1  | 0.008 | 164  | 28  | 0.146 |
| 627844 | 16 | 47675018  | 47675018  | G       |  | A     | SNP | <i>PHKB</i>            | ENST00000299167 | 1  | intronic                    | c.1514+17           | e15+17    | tier3 | 117 | 3  | 0.025 | 164  | 66  | 0.287 |
| 627844 | 16 | 89836214  | 89836214  | G       |  | C     | SNP | <i>FANCA</i>           | ENST00000567205 | -1 | 3_prime_untranslated_region | c.*27               | NULL      | tier3 | 894 | 8  | 0.009 | 862  | 422 | 0.328 |
| 627844 | 17 | 9282009   | 9282009   | G       |  | G     | SNP | <i>STX8</i>            | ENST00000306357 | -1 | intronic                    | c.542-39            | e7-39     | tier3 | 127 | 0  | 0.000 | 165  | 75  | 0.313 |
| 627844 | 17 | 11622752  | 11622752  | C       |  | A     | SNP | <i>DNAH9</i>           | ENST00000262442 | 1  | missense                    | c.5654              | p.R1885H  | tier1 | 434 | 5  | 0.011 | 432  | 208 | 0.325 |
| 627844 | 17 | 26923218  | 26923218  | C       |  | A     | SNP | <i>SPAG5</i>           | ENST00000321765 | -1 | intronic                    | c.177+2310          | e2+2310   | tier4 | 153 | 0  | 0.000 | 217  | 16  | 0.068 |
| 627844 | 17 | 34894610  | 34894610  | T       |  | -     | DEL | <i>PIGW</i>            | ENST00000328396 | 1  | 3_prime_untranslated_region | c.*145              | NULL      | tier4 | 216 | 5  | 0.023 | 343  | 36  | 0.095 |
| 627844 | 18 | 43532461  | 43532462  | -       |  | ACCC  | INS | <i>EPG5</i>            | ENST00000282041 | -1 | frame_shift_ins             | c.1157_1156         | p.S386fs  | tier1 | 102 | 0  | 0.000 | 100  | 20  | 0.167 |
| 627844 | 18 | 61323095  | 61323095  | G       |  | A     | SNP | <i>SERPINB3</i>        | ENST00000283752 | -1 | silent                      | c.969               | p.L323    | tier1 | 121 | 2  | 0.016 | 124  | 57  | 0.313 |
| 627844 | 19 | 20045145  | 20045145  | G       |  | A     | SNP | <i>ZNF93</i>           | ENST00000343769 | 1  | missense                    | c.1381              | p.A461T   | tier1 | 76  | 0  | 0.000 | 128  | 63  | 0.328 |
| 627844 | 20 | 57464277  | 57464278  | -       |  | CGGCG | INS | <i>GNAS</i>            | ENST00000469431 | 1  | rna                         | NULL                | NULL      | tier1 | 13  | 0  | 0.000 | 6    | 16  | 0.727 |
| 627844 | 21 | 36259256  | 36259257  | -       |  | CA    | INS | <i>RUNX1</i>           | ENST00000300305 | -1 | frame_shift_ins             | c.235_234           | p.V78fs   | tier1 | 983 | 10 | 0.010 | 852  | 354 | 0.294 |
| 627844 | X  | 13337504  | 13337504  | C       |  | T     | SNP | <i>ATXN3L</i>          | ENST00000380622 | -1 | missense                    | c.550               | p.E184K   | tier1 | 46  | 0  | 0.000 | 34   | 50  | 0.595 |
| 627844 | X  | 119387527 | 119387527 | A       |  | G     | SNP | <i>ZBTB33</i>          | ENST00000326624 | 1  | missense                    | c.257               | p.Y86C    | tier1 | 435 | 16 | 0.035 | 284  | 472 | 0.624 |
| 627844 | Y  | 13311260  | 13311260  | A       |  | G     | SNP | <i>ENSG00000270570</i> | ENST00000603467 | -1 | 5_prime_flanking_region     | c.-47697            | NULL      | tier3 | 138 | 3  | 0.021 | 184  | 23  | 0.111 |
| 635308 | 1  | 653070    |           |         |  |       |     |                        |                 |    |                             |                     |           |       |     |    |       |      |     |       |



|        |    |           |           |     |   |     |                        |                 |    |                             |              |           |       |     |   |       |      |     |       |
|--------|----|-----------|-----------|-----|---|-----|------------------------|-----------------|----|-----------------------------|--------------|-----------|-------|-----|---|-------|------|-----|-------|
| 635308 | 4  | 68930609  | 68930609  | G   | A | SNP | <i>TMPRSS11F</i>       | ENST00000356291 | -1 | missense                    | c.809        | p.P270L   | tier1 | 75  | 0 | 0.000 | 156  | 21  | 0.119 |
| 635308 | 4  | 183723682 | 183723682 | C   | G | SNP | <i>TENM3</i>           | ENST00000511685 | 1  | 3_prime_untranslated_region | c.*2178      | NULL      | tier2 | 87  | 0 | 0.000 | 177  | 33  | 0.157 |
| 635308 | 4  | 187088020 | 187088020 | G   | C | SNP | <i>FAM149A</i>         | ENST00000356371 | 1  | intronic                    | c.2038-102   | e12-102   | tier3 | 22  | 0 | 0.000 | 59   | 27  | 0.314 |
| 635308 | 5  | 60253633  | 60253633  | A   | G | SNP | <i>NDUFAB2</i>         | ENST00000296597 | 1  | intronic                    | c.127+12424  | e1+12424  | tier3 | 143 | 0 | 0.000 | 291  | 56  | 0.161 |
| 635308 | 5  | 73178364  | 73178364  | C   | A | SNP | <i>ARHGFE28</i>        | ENST00000545377 | 1  | missense                    | c.2882       | p.A961D   | tier1 | 131 | 0 | 0.000 | 234  | 47  | 0.167 |
| 635308 | 5  | 137464931 | 137464931 | C   | T | SNP | <i>NME5</i>            | ENST00000265191 | -1 | intronic                    | c.335+21     | e2+21     | tier3 | 64  | 1 | 0.015 | 152  | 27  | 0.151 |
| 635308 | 5  | 171706385 | 171706385 | A   | C | SNP | <i>UBTD2</i>           | ENST00000393792 | -1 | intronic                    | c.70+4215    | e1+4215   | tier4 | 55  | 0 | 0.000 | 141  | 25  | 0.150 |
| 635308 | 6  | 41575854  | 41575854  | G   | A | SNP | <i>MDFI</i>            | ENST00000230321 | 1  | 5_prime_flanking_region     | c.-30634     | NULL      | tier3 | 69  | 0 | 0.000 | 171  | 32  | 0.156 |
| 635308 | 6  | 75890933  | 75890933  | T   | A | SNP | <i>COL12A1</i>         | ENST00000322507 | -1 | splice_region               | c.1892-6     | e10-6     | tier3 | 146 | 3 | 0.020 | 262  | 74  | 0.220 |
| 635308 | 6  | 161565095 | 161565095 | C   | T | SNP | <i>AGPAT4</i>          | ENST00000437165 | -1 | 3_prime_untranslated_region | c.*66        | NULL      | tier3 | 58  | 0 | 0.000 | 131  | 18  | 0.121 |
| 635308 | 7  | 70252341  | 70252341  | G   | A | SNP | <i>AUTS2</i>           | ENST00000342771 | 1  | missense                    | c.2455       | p.A819T   | tier1 | 41  | 0 | 0.000 | 89   | 16  | 0.152 |
| 635308 | 7  | 102194790 | 102194790 | T   | A | SNP | <i>SPDYE2</i>          | ENST00000507918 | 1  | intronic                    | c.161-16     | e2-16     | tier3 | 170 | 1 | 0.006 | 454  | 50  | 0.099 |
| 635308 | 7  | 123152386 | 123152386 | A   | G | SNP | <i>IQUB</i>            | ENST00000324698 | -1 | silent                      | c.9          | p.N3      | tier1 | 35  | 0 | 0.000 | 76   | 17  | 0.183 |
| 635308 | 7  | 157629910 | 157629910 | T   | C | SNP | <i>PTPRN2</i>          | ENST00000404321 | -1 | intronic                    | c.1857+61455 | e12+61455 | tier4 | 103 | 5 | 0.046 | 366  | 96  | 0.207 |
| 635308 | 8  | 28203295  | 28203295  | C   | T | SNP | <i>ZNF395</i>          | ENST00000344423 | -1 | 3_prime_untranslated_region | c.*2941      | NULL      | tier3 | 59  | 2 | 0.033 | 104  | 30  | 0.224 |
| 635308 | 9  | 124441020 | 124441020 | C   | T | SNP | <i>DAB2IP</i>          | ENST00000408936 | 1  | missense                    | c.188        | p.P63L    | tier1 | 78  | 0 | 0.000 | 178  | 42  | 0.191 |
| 635308 | 9  | 124751442 | 124751442 | G   | A | SNP | <i>TTLL11</i>          | ENST00000373776 | -1 | missense                    | c.1571       | p.P524L   | tier1 | 58  | 1 | 0.017 | 100  | 19  | 0.160 |
| 635308 | 11 | 47364238  | 47364238  | C   | T | SNP | <i>MYBPC3</i>          | ENST00000399249 | -1 | silent                      | c.1515       | p.K505    | tier1 | 52  | 0 | 0.000 | 80   | 14  | 0.149 |
| 635308 | 11 | 49813519  | 49813519  | G   | T | SNP | <i>LOC440040</i>       | ENST00000527477 | 1  | splice_region               | c.NULL       | NULL      | tier4 | 22  | 0 | 0.000 | 55   | 25  | 0.305 |
| 635308 | 11 | 50379335  | 50379335  | G   | A | SNP | <i>ENSG00000214883</i> | ENST00000532521 | 1  | 3_prime_untranslated_region | c.*50379335  | NULL      | tier2 | 40  | 0 | 0.000 | 137  | 23  | 0.144 |
| 635308 | 11 | 56019747  | 56019747  | A   | T | SNP | <i>OR5T3</i>           | ENST00000303059 | 1  | silent                      | c.72         | p.S24     | tier1 | 93  | 2 | 0.021 | 112  | 45  | 0.283 |
| 635308 | 11 | 62327453  | 62327453  | T   | A | SNP | <i>MIR3654</i>         | ENST00000496634 | -1 | intronic                    | c.1578+88    | e9+88     | tier3 | 34  | 0 | 0.000 | 66   | 14  | 0.175 |
| 635308 | 11 | 124189425 | 124189425 | A   | - | DEL | <i>OR8D2</i>           | ENST00000357438 | -1 | frame_shift_del             | c.669        | p.S224fs  | tier1 | 40  | 0 | 0.000 | 68   | 22  | 0.244 |
| 635308 | 11 | 132306614 | 132306614 | G   | A | SNP | <i>OPCML</i>           | ENST00000541867 | -1 | silent                      | c.724        | p.L242    | tier1 | 65  | 0 | 0.000 | 86   | 14  | 0.139 |
| 635308 | 12 | 7363619   | 7363619   | T   | A | SNP | <i>PEX5</i>            | ENST00000266564 | 1  | 3_prime_untranslated_region | c.*800       | NULL      | tier3 | 56  | 0 | 0.000 | 109  | 18  | 0.142 |
| 635308 | 12 | 21791412  | 21791412  | A   | T | SNP | <i>LDHB</i>            | ENST00000470985 | -1 | 5_prime_untranslated_region | c.-21791412  | NULL      | tier3 | 138 | 0 | 0.000 | 306  | 20  | 0.061 |
| 635308 | 12 | 32854280  | 32854280  | A   | G | SNP | <i>DNM1L</i>           | ENST00000553257 | 1  | intronic                    | c.103-69     | e2-69     | tier3 | 72  | 0 | 0.000 | 156  | 19  | 0.108 |
| 635308 | 12 | 52966303  | 52966303  | C   | T | SNP | <i>KRT74</i>           | ENST00000305620 | -1 | missense                    | c.620        | p.G207E   | tier1 | 48  | 0 | 0.000 | 91   | 17  | 0.157 |
| 635308 | 13 | 29600575  | 29600575  | G   | T | SNP | <i>MTUS2</i>           | ENST00000431530 | 1  | missense                    | c.1770       | p.L590F   | tier1 | 594 | 5 | 0.008 | 1002 | 221 | 0.181 |
| 635308 | 14 | 33292181  | 33292181  | G   | A | SNP | <i>AKAP6</i>           | ENST00000280979 | 1  | missense                    | c.5162       | p.R1721H  | tier1 | 58  | 0 | 0.000 | 101  | 13  | 0.114 |
| 635308 | 14 | 63453786  | 63453786  | T   | A | SNP | <i>KCNH5</i>           | ENST00000322893 | -1 | splice_region               | c.549+4      | e5+4      | tier2 | 77  | 0 | 0.000 | 178  | 51  | 0.223 |
| 635308 | 14 | 70410184  | 70410184  | G   | - | DEL | <i>SMOC1</i>           | ENST00000361956 | -1 | intronic                    | c.100-8671   | e2-8671   | tier2 | 140 | 0 | 0.000 | 215  | 31  | 0.126 |
| 635308 | 15 | 102295698 | 102295700 | GCT | - | DEL | <i>DNM1P47</i>         | ENST00000561463 | 1  | rna                         | NULL         | NULL      | tier1 | 27  | 0 | 0.000 | 32   | 10  | 0.238 |
| 635308 | 16 | 848710    | 848710    | G   | A | SNP | <i>GNG13</i>           | ENST00000248150 | -1 | 3_prime_untranslated_region | c.*9         | NULL      | tier3 | 83  | 0 | 0.000 | 165  | 39  | 0.191 |
| 635308 | 16 | 85145834  | 85145834  | C   | T | SNP | <i>FAM92B</i>          | ENST00000539556 | -1 | intronic                    | c.20+105     | e1+105    | tier3 | 99  | 0 | 0.000 | 174  | 32  | 0.155 |
| 635308 | 17 | 78440948  | 78440948  | G   | T | SNP | <i>NPTX1</i>           | ENST00000535681 | -1 | 5_prime_untranslated_region | c.-78440948  | NULL      | tier2 | 29  | 1 | 0.032 | 45   | 20  | 0.299 |
| 635308 | 17 | 79898724  | 79898724  | G   | A | SNP | <i>MYADML2</i>         | ENST00000330655 | -1 | silent                      | c.894        | p.S298    | tier1 | 103 | 0 | 0.000 | 182  | 32  | 0.149 |
| 635308 | 19 | 9088712   | 9088712   | C   | G | SNP | <i>MUC16</i>           | ENST00000397910 | -1 | missense                    | c.3103       | p.V1035L  | tier1 | 544 | 8 | 0.015 | 1277 | 269 | 0.173 |
| 635308 | 19 | 49464172  | 49464172  | G   | A | SNP | <i>BAX</i>             | ENST00000345358 | -1 | splice_site                 | c.474+1      | e5+1      | tier1 | 53  | 0 | 0.000 | 112  | 30  | 0.208 |
| 635308 | 21 | 47918578  | 47918578  | G   | C | SNP | <i>DIP2A</i>           | ENST00000318711 | 1  | missense                    | c.487        | p.V163L   | tier1 | 64  | 0 | 0.000 | 117  | 18  | 0.132 |
| 635308 | X  | 57620926  | 57620926  | A   | T | SNP | <i>ZXDB</i>            | ENST00000374888 | 1  | 3_prime_untranslated_region | c.*33        | NULL      | tier3 | 72  | 0 | 0.000 | 146  | 24  | 0.141 |
| 635308 | X  | 153283630 | 153283630 | G   | A | SNP | <i>IRAK1</i>           | ENST00000369980 | -1 | intronic                    | c.795-59     | e7-59     | tier3 | 82  | 0 | 0.000 | 147  | 28  | 0.160 |
| 639691 | 1  | 45296629  | 45296629  | C   | T | SNP | <i>PTCH2</i>           | ENST00000372192 | -1 | missense                    | c.704        | p.R235Q   | tier1 | 41  | 0 | 0.000 | 57   | 13  | 0.181 |
| 639691 | 1  | 118644343 | 118644343 | G   | A | SNP | <i>SPAG17</i>          | ENST00000336338 | -1 | intronic                    | c.634+20     | e5+20     | tier3 | 62  | 0 | 0.000 | 95   | 25  | 0.207 |
| 639691 | 1  | 144857704 | 144857704 | C   | A | SNP | <i>PDE4DIP</i>         | ENST00000369356 | -1 | missense                    | c.6350       | p.R2117L  | tier1 | 409 | 1 | 0.002 | 601  | 20  | 0.032 |
| 639691 | 1  | 152276933 | 152276933 | G   | T | SNP | <i>FLG</i>             | ENST00000368799 | -1 | missense                    | c.10429      | p.R3477S  | tier1 | 716 | 1 | 0.001 | 1022 | 24  | 0.023 |
| 639691 | 1  | 152281796 | 152281796 | G   | T | SNP | <i>FLG</i>             | ENST00000368799 | -1 | missense                    | c.5566       | p.R1856S  | tier1 | 790 | 0 | 0.000 | 1023 | 23  | 0.022 |
| 639691 | 1  | 160105026 | 160105026 | G   | A | SNP | <i>ATP1A2</i>          | ENST00000361216 | 1  | missense                    | c.2056       | p.V686I   | tier1 | 29  | 0 | 0.000 | 26   | 14  | 0.350 |
| 639691 | 1  | 205389686 | 205389686 | T   | C | SNP | <i>LEMD1</i>           | ENST00000476884 | -1 | rna                         | NULL         | NULL      | tier1 | 53  | 0 | 0.000 | 98   | 15  | 0.133 |
| 639691 | 2  | 9558907   | 9558907   | T   | G | SNP | <i>ITGB1BP1</i>        | ENST00000355346 | -1 | intronic                    | c.1-46       | e1-46     | tier4 | 37  | 0 | 0.000 | 50   | 17  | 0.254 |
| 639691 | 2  | 9558909   | 9558909   | T   | A | SNP | <i>ITGB1BP1</i>        | ENST00000355346 | -1 | intronic                    | c.1-48       | e1-48     | tier4 | 37  | 0 | 0.000 | 45   | 14  | 0.237 |
| 639691 | 2  | 21238368  | 21238368  | G   | T | SNP | <i>APOB</i>            | ENST00000233242 | -1 | missense                    | c.3382       | p.R1128S  | tier1 | 372 | 0 | 0.000 | 594  | 19  | 0.031 |
| 639691 | 2  | 71762298  | 71762298  | C   | A | SNP | <i>DYSF</i>            | ENST00000413539 | 1  | intronic                    | c.1446+79    | e15+79    | tier3 | 255 | 0 | 0.000 | 297  | 15  | 0.048 |
| 639691 | 2  | 89160377  | 89160377  | G   | C | SNP | <i>ENSG00000231486</i> | ENST00000418209 | -1 | intronic                    | c.NULL       | NULL      | tier3 | 47  | 0 | 0.000 | 18   | 30  | 0.625 |
| 639691 | 2  | 89160420  | 89160420  | T   | C | SNP | <i>IGKJ4</i>           | ENST00000390239 | -1 | silent                      | c.15         | p.G5      | tier1 | 68  | 0 | 0.000 | 44   | 12  | 0.211 |
| 639691 | 2  | 89160450  | 89160450  | T   | G | SNP | <i>ENSG00000231486</i> | ENST00000418209 | -1 | intronic                    | c.NULL       | NULL      | tier3 | 72  | 0 | 0.000 | 45   | 10  | 0.182 |
| 639691 | 2  | 89160485  | 89160485  | A   | G | SNP | <i>ENSG00000231486</i> | ENST00000418209 | -1 | intronic                    | c.NULL       | NULL      | tier3 | 66  | 0 | 0.000 | 45   | 7   | 0.135 |
| 639691 | 2  | 89160500  | 89160500  | C   | G | SNP | <i>ENSG00000231486</i> | ENST00000418209 | -1 | intronic                    | c.NULL       | NULL      | tier3 | 67  | 0 | 0.000 | 48   | 7   | 0.127 |
| 639691 | 2  | 89160507  | 89160507  | T   | G | SNP | <i>ENSG00000231486</i> | ENST00000418209 | -1 | intronic                    | c.NULL       | NULL      | tier3 | 65  | 0 | 0.000 | 47   | 7   | 0.130 |
| 639691 | 2  | 89160663  | 89160663  | T   | C | SNP | <i>ENSG00000231486</i> | ENST00000418209 | -1 | intronic                    | c.NULL       | NULL      | tier3 | 78  | 0 | 0.000 | 41   | 31  | 0.431 |
| 639691 | 2  | 89160686  | 89160686  | T   | C | SNP | <i>ENSG00000231486</i> | ENST00000418209 | -1 | intronic                    | c.NULL       | NULL      | tier3 | 101 | 0 | 0.000 | 66   | 41  | 0.380 |
| 639691 | 2  | 89160714  | 89160714  | T   | C | SNP | <i>ENSG00000231486</i> | ENST00000418209 | -1 | intronic                    | c.NULL       | NULL      | tier3 | 123 | 0 | 0.000 | 82   | 53  | 0.393 |
| 639691 | 2  | 89160740  | 89160740  | A   | C | SNP | <i>IGKJ3</i>           | ENST00000390240 | -1 | missense                    | c.31         | p.Y11D    | tier1 | 168 | 1 | 0.006 | 119  | 73  | 0.380 |
| 639691 | 2  | 89160789  | 89160789  | C   | T | SNP | <i>ENSG00000231486</i> | ENST00000418209 | -1 | intronic                    | c.NULL       | NULL      | tier3 | 222 | 0 | 0.000 | 161  | 62  | 0.277 |
| 639691 | 2  | 89160801  | 89160801  | C   | T | SNP | <i>ENSG00000231486</i> | ENST00000418209 | -1 | intronic                    | c.NULL       | NULL      | tier3 | 218 | 1 | 0.005 | 164  | 60  | 0.268 |
| 639691 | 2  | 89160806  | 89160806  | A   | G | SNP | <i>ENSG00000231486</i> | ENST00000418209 | -1 | intronic                    | c.NULL       | NULL      | tier3 | 220 | 0 | 0.000 | 159  | 59  | 0.269 |
| 639691 | 2  | 89160841  | 89160841  | G   | G | SNP | <i>ENSG00000231486</i> | ENST00000418209 | -1 | intronic                    | c.NULL       | NULL      | tier3 | 222 | 0 | 0.000 | 153  | 43  | 0.217 |

|        |    |           |           |      |   |     |                        |                 |    |                             |                       |          |       |     |   |       |      |     |       |
|--------|----|-----------|-----------|------|---|-----|------------------------|-----------------|----|-----------------------------|-----------------------|----------|-------|-----|---|-------|------|-----|-------|
| 639691 | 2  | 89185292  | 89185292  | T    | C | SNP | <i>IGKV4-1</i>         | ENST00000390243 | 1  | intronic                    | c.50-64               | e2-64    | tier3 | 75  | 0 | 0.000 | 100  | 11  | 0.099 |
| 639691 | 2  | 89185531  | 89185531  | C    | G | SNP | <i>IGKV4-1</i>         | ENST00000390243 | 1  | nonsense                    | c.225                 | p.Y75*   | tier1 | 180 | 0 | 0.000 | 81   | 9   | 0.100 |
| 639691 | 2  | 89185535  | 89185535  | G    | A | SNP | <i>IGKV4-1</i>         | ENST00000390243 | 1  | missense                    | c.229                 | p.A77T   | tier1 | 178 | 0 | 0.000 | 78   | 8   | 0.093 |
| 639691 | 2  | 89185568  | 89185568  | T    | G | SNP | <i>IGKV4-1</i>         | ENST00000390243 | 1  | missense                    | c.262                 | p.F88V   | tier1 | 189 | 0 | 0.000 | 68   | 9   | 0.117 |
| 639691 | 2  | 89246846  | 89246846  | A    | G | SNP | <i>IGKV1-5</i>         | ENST00000496168 | -1 | silent                      | c.324                 | p.Y108   | tier1 | 160 | 0 | 0.000 | 137  | 11  | 0.074 |
| 639691 | 2  | 89246861  | 89246861  | A    | T | SNP | <i>IGKV1-5</i>         | ENST00000496168 | -1 | missense                    | c.309                 | p.D103E  | tier1 | 165 | 0 | 0.000 | 153  | 15  | 0.089 |
| 639691 | 2  | 89246918  | 89246918  | G    | A | SNP | <i>IGKV1-5</i>         | ENST00000496168 | -1 | silent                      | c.252                 | p.F84    | tier1 | 178 | 0 | 0.000 | 176  | 25  | 0.123 |
| 639691 | 2  | 89246947  | 89246947  | T    | G | SNP | <i>IGKV1-5</i>         | ENST00000496168 | -1 | missense                    | c.223                 | p.S75R   | tier1 | 178 | 1 | 0.006 | 182  | 26  | 0.125 |
| 639691 | 2  | 89246969  | 89246969  | C    | G | SNP | <i>IGKV1-5</i>         | ENST00000496168 | -1 | missense                    | c.201                 | p.K67N   | tier1 | 171 | 0 | 0.000 | 159  | 22  | 0.121 |
| 639691 | 2  | 89246970  | 89246970  | T    | C | SNP | <i>IGKV1-5</i>         | ENST00000496168 | -1 | missense                    | c.200                 | p.K67R   | tier1 | 170 | 0 | 0.000 | 157  | 23  | 0.128 |
| 639691 | 2  | 89247181  | 89247181  | T    | G | SNP | <i>IGKV1-5</i>         | ENST00000496168 | -1 | intronic                    | c.55+59               | e1+59    | tier3 | 167 | 0 | 0.000 | 168  | 66  | 0.280 |
| 639691 | 2  | 89247195  | 89247195  | T    | C | SNP | <i>IGKV1-5</i>         | ENST00000496168 | -1 | intronic                    | c.55+45               | e1+45    | tier3 | 180 | 0 | 0.000 | 177  | 64  | 0.265 |
| 639691 | 2  | 89247280  | 89247280  | G    | T | SNP | <i>IGKV1-5</i>         | ENST00000496168 | -1 | silent                      | c.15                  | p.V5     | tier1 | 187 | 0 | 0.000 | 172  | 66  | 0.276 |
| 639691 | 2  | 114355305 | 114355305 | C    | A | SNP | <i>WASH2P</i>          | ENST00000538033 | 1  | intronic                    | c.NULL                | NULL     | tier3 | 125 | 0 | 0.000 | 129  | 10  | 0.071 |
| 639691 | 2  | 141356343 | 141356343 | C    | A | SNP | <i>LRP1B</i>           | ENST00000389484 | -1 | missense                    | c.7051                | p.G2351W | tier1 | 452 | 0 | 0.000 | 954  | 26  | 0.027 |
| 639691 | 2  | 202436665 | 202436665 | T    | G | SNP | <i>ALS2CR11</i>        | ENST00000286195 | -1 | missense                    | c.832                 | p.T278P  | tier1 | 54  | 1 | 0.018 | 91   | 29  | 0.242 |
| 639691 | 3  | 15176119  | 15176119  | G    | T | SNP | <i>ZFYVE20</i>         | ENST00000253699 | -1 | 5_prime_flanking_region     | c.-38492              | NULL     | tier3 | 368 | 0 | 0.000 | 597  | 19  | 0.031 |
| 639691 | 3  | 38592896  | 38592896  | G    | A | SNP | <i>SCN5A</i>           | ENST00000333535 | -1 | missense                    | c.4967                | p.A1656V | tier1 | 142 | 1 | 0.007 | 241  | 62  | 0.205 |
| 639691 | 3  | 71247370  | 71247370  | G    | T | SNP | <i>FOXP1</i>           | ENST00000318789 | -1 | missense                    | c.163                 | p.Q55K   | tier1 | 589 | 0 | 0.000 | 774  | 22  | 0.028 |
| 639691 | 3  | 193007798 | 193007798 | G    | C | SNP | <i>ATP13A5</i>         | ENST00000342358 | -1 | missense                    | c.2899                | p.Q967E  | tier1 | 66  | 0 | 0.000 | 103  | 16  | 0.135 |
| 639691 | 3  | 193721356 | 193721356 | C    | A | SNP | <i>LOC647323</i>       | ENST00000397645 | -1 | intronic                    | c.NULL                | NULL     | tier2 | 100 | 0 | 0.000 | 104  | 10  | 0.088 |
| 639691 | 4  | 55594015  | 55594015  | G    | T | SNP | <i>KIT</i>             | ENST00000288135 | 1  | missense                    | c.1801                | p.G601W  | tier1 | 338 | 0 | 0.000 | 610  | 20  | 0.032 |
| 639691 | 4  | 100273911 | 100273911 | G    | T | SNP | <i>ADH1C</i>           | ENST00000515683 | -1 | 5_prime_untranslated_region | c.-79                 | NULL     | tier3 | 52  | 0 | 0.000 | 81   | 22  | 0.214 |
| 639691 | 4  | 106196822 | 106196822 | G    | T | SNP | <i>TET2</i>            | ENST00000380013 | 1  | missense                    | c.5155                | p.G1719W | tier1 | 496 | 1 | 0.002 | 884  | 24  | 0.026 |
| 639691 | 4  | 114278785 | 114278785 | G    | T | SNP | <i>ANK2</i>            | ENST00000357077 | 1  | missense                    | c.9011                | p.W3004L | tier1 | 457 | 0 | 0.000 | 793  | 22  | 0.027 |
| 639691 | 4  | 189013998 | 189013998 | T    | C | SNP | <i>TRIML2</i>          | ENST00000503141 | -1 | 3_prime_untranslated_region | c.*4297               | NULL     | tier4 | 72  | 0 | 0.000 | 96   | 33  | 0.256 |
| 639691 | 5  | 38968092  | 38968092  | G    | A | SNP | <i>RICTOR</i>          | ENST00000296782 | -1 | missense                    | c.1013                | p.P338L  | tier1 | 49  | 0 | 0.000 | 133  | 29  | 0.178 |
| 639691 | 5  | 96248518  | 96248512  | TAAC | - | DEL | <i>ERAP2</i>           | ENST00000437043 | 1  | intronic                    | c.2516+16_2516+13     | e15+16   | tier3 | 49  | 0 | 0.000 | 105  | 21  | 0.167 |
| 639691 | 5  | 140604754 | 140604754 | C    | A | SNP | <i>PCDHB14</i>         | ENST00000239449 | 1  | silent                      | c.1677                | p.P559   | tier1 | 170 | 0 | 0.000 | 192  | 11  | 0.054 |
| 639691 | 5  | 149808594 | 149808594 | G    | T | SNP | <i>CD74</i>            | ENST00000009530 | -1 | 5_prime_flanking_region     | c.-16282              | NULL     | tier4 | 127 | 0 | 0.000 | 101  | 8   | 0.073 |
| 639691 | 6  | 325891    | 325891    | G    | T | SNP | <i>DUSP22</i>          | ENST00000604971 | 1  | 5_prime_untranslated_region | c.-22258              | NULL     | tier3 | 264 | 0 | 0.000 | 245  | 13  | 0.049 |
| 639691 | 6  | 15501389  | 15501389  | C    | T | SNP | <i>JARID2</i>          | ENST00000341776 | 1  | missense                    | c.2197                | p.R733C  | tier1 | 57  | 0 | 0.000 | 69   | 16  | 0.188 |
| 639691 | 6  | 18139973  | 18139974  | AT   | - | DEL | <i>TPMT</i>            | ENST00000309983 | -1 | intronic                    | c.367-26_367-25       | e4-25    | tier4 | 52  | 0 | 0.000 | 94   | 18  | 0.161 |
| 639691 | 6  | 52701179  | 52701179  | A    | - | DEL | <i>GSTA5</i>           | ENST00000284562 | -1 | intronic                    | c.140-13              | e3-13    | tier3 | 65  | 0 | 0.000 | 87   | 35  | 0.287 |
| 639691 | 6  | 76343330  | 76343330  | T    | C | SNP | <i>SENP6</i>           | ENST00000370014 | 1  | missense                    | c.241                 | p.S81P   | tier1 | 42  | 0 | 0.000 | 144  | 26  | 0.152 |
| 639691 | 6  | 119285878 | 119285878 | A    | C | SNP | <i>FAM184A</i>         | ENST00000338891 | -1 | missense                    | c.3092                | p.V1031G | tier1 | 38  | 0 | 0.000 | 135  | 57  | 0.297 |
| 639691 | 6  | 127912679 | 127912679 | C    | - | DEL | <i>C6orf58</i>         | ENST00000329722 | 1  | splice_region_del           | c.914-9               | e6-9     | tier3 | 57  | 0 | 0.000 | 292  | 42  | 0.126 |
| 639691 | 7  | 2515372   | 2515372   | G    | T | SNP | <i>GRIFIN</i>          | ENST00000417742 | -1 | rna                         | NULL                  | NULL     | tier1 | 169 | 0 | 0.000 | 171  | 10  | 0.055 |
| 639691 | 7  | 43484053  | 43484053  | C    | A | SNP | <i>HECW1</i>           | ENST00000395891 | 1  | missense                    | c.1282                | p.Q428K  | tier1 | 379 | 3 | 0.008 | 392  | 157 | 0.286 |
| 639691 | 7  | 99795840  | 99795840  | G    | T | SNP | <i>STAG3</i>           | ENST00000317296 | 1  | intronic                    | c.1244+51             | e11+51   | tier3 | 268 | 0 | 0.000 | 311  | 14  | 0.043 |
| 639691 | 7  | 142482221 | 142482221 | G    | T | SNP | <i>PRSS3P2</i>         | ENST00000603901 | 1  | rna                         | NULL                  | NULL     | tier1 | 58  | 0 | 0.000 | 24   | 6   | 0.200 |
| 639691 | 8  | 26628125  | 26628125  | G    | A | SNP | <i>ADRA1A</i>          | ENST00000380586 | -1 | silent                      | c.942                 | p.L314   | tier1 | 48  | 0 | 0.000 | 88   | 29  | 0.248 |
| 639691 | 8  | 40012484  | 40012484  | A    | C | SNP | <i>C8orf4</i>          | ENST00000315792 | 1  | 3_prime_untranslated_region | c.*1112               | NULL     | tier2 | 15  | 0 | 0.000 | 81   | 40  | 0.331 |
| 639691 | 8  | 131073071 | 131073071 | G    | T | SNP | <i>ASAP1</i>           | ENST00000524124 | -1 | missense                    | c.2407                | p.Q803K  | tier1 | 94  | 0 | 0.000 | 79   | 8   | 0.092 |
| 639691 | 8  | 142506437 | 142506437 | C    | A | SNP | <i>MROH5</i>           | ENST00000521161 | -1 | missense                    | c.140                 | p.G47V   | tier1 | 384 | 0 | 0.000 | 464  | 15  | 0.031 |
| 639691 | 8  | 145745801 | 145745801 | A    | C | SNP | <i>LRRC14</i>          | ENST00000292524 | 1  | missense                    | c.509                 | p.D170A  | tier1 | 72  | 1 | 0.014 | 75   | 21  | 0.219 |
| 639691 | 9  | 13217161  | 13217161  | C    | T | SNP | <i>MPDZ</i>            | ENST00000319217 | -1 | intronic                    | c.1201+18             | e8+18    | tier3 | 42  | 0 | 0.000 | 164  | 55  | 0.251 |
| 639691 | 9  | 119730785 | 119730787 | GAG  | - | DEL | <i>ASTN2</i>           | ENST00000313400 | -1 | intronic                    | c.1889+6700_1889+6698 | e10+6700 | tier3 | 37  | 0 | 0.000 | 50   | 12  | 0.194 |
| 639691 | 9  | 140286997 | 140286997 | G    | T | SNP | <i>EXD3</i>            | ENST00000465160 | -1 | 3_prime_untranslated_region | c.*575                | NULL     | tier3 | 110 | 0 | 0.000 | 136  | 11  | 0.075 |
| 639691 | 9  | 141013150 | 141013150 | G    | T | SNP | <i>CACNA1B</i>         | ENST00000371355 | 1  | missense                    | c.5963                | p.G1988V | tier1 | 199 | 0 | 0.000 | 219  | 12  | 0.052 |
| 639691 | 10 | 124458903 | 124458903 | C    | A | SNP | <i>C10orf120</i>       | ENST00000329446 | -1 | missense                    | c.202                 | p.D68Y   | tier1 | 164 | 0 | 0.000 | 177  | 69  | 0.281 |
| 639691 | 11 | 1267352   | 1267352   | C    | A | SNP | <i>MUC5B</i>           | ENST00000447027 | 1  | missense                    | c.9251                | p.P3084Q | tier1 | 480 | 0 | 0.000 | 573  | 18  | 0.030 |
| 639691 | 11 | 1271142   | 1271142   | C    | A | SNP | <i>MUC5B</i>           | ENST00000447027 | 1  | silent                      | c.13041               | p.P4347  | tier1 | 577 | 1 | 0.002 | 580  | 21  | 0.035 |
| 639691 | 11 | 1271180   | 1271180   | C    | A | SNP | <i>MUC5B</i>           | ENST00000447027 | 1  | missense                    | c.13079               | p.P4360Q | tier1 | 681 | 0 | 0.000 | 713  | 19  | 0.026 |
| 639691 | 11 | 6235593   | 6235593   | T    | C | SNP | <i>FAM160A2</i>        | ENST00000265978 | -1 | intronic                    | c.2599+48             | e10+48   | tier3 | 57  | 0 | 0.000 | 90   | 13  | 0.126 |
| 639691 | 11 | 64794980  | 64794980  | C    | T | SNP | <i>SNX15</i>           | ENST00000377244 | 1  | 5_prime_untranslated_region | c.-30                 | NULL     | tier2 | 67  | 2 | 0.029 | 60   | 26  | 0.302 |
| 639691 | 11 | 118918816 | 118918816 | A    | - | DEL | <i>HYOU1</i>           | ENST00000527738 | -1 | 5_prime_untranslated_region | c.-118918816          | NULL     | tier3 | 41  | 0 | 0.000 | 52   | 21  | 0.288 |
| 639691 | 12 | 4920436   | 4920436   | C    | A | SNP | <i>KCNA6</i>           | ENST00000280684 | 1  | missense                    | c.1229                | p.P410Q  | tier1 | 91  | 0 | 0.000 | 72   | 8   | 0.100 |
| 639691 | 12 | 70349145  | 70349145  | C    | G | SNP | <i>MYRFL</i>           | ENST00000299350 | 1  | missense                    | c.473                 | p.S158C  | tier1 | 62  | 0 | 0.000 | 192  | 63  | 0.247 |
| 639691 | 12 | 93477504  | 93477504  | C    | A | SNP | <i>ENSG00000257322</i> | ENST00000549930 | -1 | intronic                    | c.NULL                | NULL     | tier4 | 39  | 0 | 0.000 | 63   | 23  | 0.267 |
| 639691 | 12 | 125292397 | 125292397 | G    | T | SNP | <i>SCARB1</i>          | ENST00000415380 | -1 | missense                    | c.919                 | p.L307M  | tier1 | 376 | 0 | 0.000 | 553  | 20  | 0.035 |
| 639691 | 13 | 31002525  | 31002525  | G    | A | SNP | <i>UBE2L5P</i>         | ENST00000436446 | 1  | 3_prime_untranslated_region | c.*31002525           | NULL     | tier2 | 94  | 0 | 0.000 | 151  | 31  | 0.170 |
| 639691 | 13 | 114530002 | 114530002 | C    | A | SNP | <i>GAS6</i>            | ENST00000357389 | -1 | missense                    | c.1573                | p.G525W  | tier1 | 279 | 0 | 0.000 | 292  | 12  | 0.039 |
| 639691 | 14 | 20264803  | 20264803  | G    | A | SNP | <i>OR4N1P</i>          | ENST00000554847 | 1  | 3_prime_untranslated_region | c.*20264803           | NULL     | tier3 | 131 | 0 | 0.000 | 188  | 48  | 0.203 |
| 639691 | 14 | 77844469  | 77844469  | C    | A | SNP | <i>SAMD15</i>          | ENST00000216471 | 1  | silent                      | c.708                 | p.T236   | tier1 | 26  | 0 | 0.000 | 24   | 8   | 0.250 |
| 639691 | 14 | 106329350 | 106329350 | C    | G | SNP | <i>ENSG00000244620</i> | ENST00000414005 | 1  | 5_prime_flanking_region     | c.-26592              | NULL     | tier2 | 31  | 0 | 0.000 | 14   | 8   | 0.348 |
| 639691 | 14 | 106329945 | 106329945 | C    | T | SNP | <i>ENSG00000244620</i> | ENST00000414005 | 1  | 5_prime_flanking_region     | c.-25997              | NULL     | tier3 | 84  | 1 | 0.012 | 59</ |     |       |

|        |    |           |           |   |   |     |                        |                 |    |                             |             |          |       |      |   |       |      |     |       |
|--------|----|-----------|-----------|---|---|-----|------------------------|-----------------|----|-----------------------------|-------------|----------|-------|------|---|-------|------|-----|-------|
| 639691 | 14 | 107034956 | 107034956 | T | C | SNP | <i>IGHV5-51</i>        | ENST00000390626 | -1 | missense                    | c.124       | p.K42E   | tier1 | 109  | 0 | 0.000 | 96   | 23  | 0.193 |
| 639691 | 14 | 107035010 | 107035010 | C | T | SNP | <i>IGHV5-51</i>        | ENST00000390626 | -1 | missense                    | c.70        | p.V24M   | tier1 | 102  | 0 | 0.000 | 102  | 16  | 0.136 |
| 639691 | 14 | 107035027 | 107035027 | C | G | SNP | <i>IGHV5-51</i>        | ENST00000390626 | -1 | missense                    | c.53        | p.C18S   | tier1 | 110  | 0 | 0.000 | 103  | 19  | 0.155 |
| 639691 | 14 | 107035049 | 107035049 | A | G | SNP | <i>IGHV5-51</i>        | ENST00000390626 | -1 | intronic                    | c.47-16     | e2-16    | tier3 | 113  | 0 | 0.000 | 83   | 16  | 0.162 |
| 639691 | 14 | 107035075 | 107035075 | A | G | SNP | <i>IGHV5-51</i>        | ENST00000390626 | -1 | intronic                    | c.46+42     | e1+42    | tier3 | 108  | 0 | 0.000 | 85   | 16  | 0.158 |
| 639691 | 14 | 107035146 | 107035146 | A | G | SNP | <i>IGHV5-51</i>        | ENST00000390626 | -1 | missense                    | c.17        | p.I6T    | tier1 | 74   | 0 | 0.000 | 65   | 13  | 0.167 |
| 639691 | 14 | 107178814 | 107178814 | C | G | SNP | <i>IGHV1-69</i>        | ENST00000390633 | -1 | 5_prime_flanking_region     | c.-8447     | NULL     | tier3 | 76   | 0 | 0.000 | 68   | 15  | 0.181 |
| 639691 | 14 | 107178822 | 107178822 | T | C | SNP | <i>IGHV2-70</i>        | ENST00000390634 | -1 | missense                    | c.355       | p.I119V  | tier1 | 79   | 0 | 0.000 | 77   | 14  | 0.154 |
| 639691 | 14 | 107178861 | 107178861 | T | C | SNP | <i>IGHV2-70</i>        | ENST00000390634 | -1 | missense                    | c.316       | p.M106V  | tier1 | 102  | 0 | 0.000 | 139  | 15  | 0.097 |
| 639691 | 14 | 107178871 | 107178871 | T | C | SNP | <i>IGHV2-70</i>        | ENST00000390634 | -1 | silent                      | c.306       | p.T102   | tier1 | 112  | 0 | 0.000 | 138  | 28  | 0.169 |
| 639691 | 14 | 107178884 | 107178884 | T | A | SNP | <i>IGHV2-70</i>        | ENST00000390634 | -1 | missense                    | c.293       | p.Q98L   | tier1 | 120  | 0 | 0.000 | 172  | 17  | 0.090 |
| 639691 | 14 | 107178935 | 107178935 | C | A | SNP | <i>IGHV2-70</i>        | ENST00000390634 | -1 | missense                    | c.242       | p.S81I   | tier1 | 141  | 0 | 0.000 | 208  | 30  | 0.126 |
| 639691 | 14 | 107179009 | 107179009 | G | A | SNP | <i>IGHV2-70</i>        | ENST00000390634 | -1 | silent                      | c.168       | p.S56    | tier1 | 172  | 0 | 0.000 | 203  | 47  | 0.188 |
| 639691 | 14 | 107179158 | 107179158 | C | T | SNP | <i>IGHV2-70</i>        | ENST00000390634 | -1 | intronic                    | c.47-28     | e2-28    | tier3 | 186  | 0 | 0.000 | 256  | 47  | 0.155 |
| 639691 | 15 | 33923426  | 33923426  | G | T | SNP | <i>RYR3</i>            | ENST00000389232 | 1  | silent                      | c.2799      | p.L933   | tier1 | 382  | 0 | 0.000 | 671  | 20  | 0.029 |
| 639691 | 16 | 1261371   | 1261371   | G | A | SNP | <i>CACNA1H</i>         | ENST00000569953 | 1  | 3_prime_untranslated_region | c.*1261371  | NULL     | tier3 | 75   | 1 | 0.013 | 61   | 12  | 0.164 |
| 639691 | 16 | 56652567  | 56652567  | C | T | SNP | <i>MT1L</i>            | ENST00000565768 | 1  | rna                         | NULL        | NULL     | tier1 | 80   | 0 | 0.000 | 79   | 17  | 0.177 |
| 639691 | 16 | 67580350  | 67580350  | C | T | SNP | <i>FAM65A</i>          | ENST00000422602 | 1  | missense                    | c.3704      | p.A1235V | tier1 | 252  | 1 | 0.004 | 330  | 44  | 0.118 |
| 639691 | 17 | 7386234   | 7386234   | G | A | SNP | <i>SLC35G6</i>         | ENST00000412468 | 1  | missense                    | c.931       | p.V311M  | tier1 | 115  | 3 | 0.025 | 128  | 26  | 0.169 |
| 639691 | 17 | 7579349   | 7579349   | A | C | SNP | <i>TP53</i>            | ENST00000269305 | -1 | missense                    | c.338       | p.F113C  | tier1 | 784  | 1 | 0.001 | 774  | 213 | 0.216 |
| 639691 | 17 | 56277172  | 56277172  | G | A | SNP | <i>EPX</i>             | ENST00000225371 | 1  | intronic                    | c.1537+17   | e9+17    | tier3 | 106  | 1 | 0.009 | 97   | 45  | 0.317 |
| 639691 | 17 | 61972742  | 61972742  | T | G | SNP | <i>CSH1</i>            | ENST00000329882 | -1 | missense                    | c.547       | p.K183Q  | tier1 | 116  | 5 | 0.041 | 109  | 41  | 0.273 |
| 639691 | 17 | 79206209  | 79206209  | C | A | SNP | <i>ENTHD2</i>          | ENST00000374769 | -1 | silent                      | c.180       | p.R60    | tier1 | 181  | 0 | 0.000 | 172  | 10  | 0.054 |
| 639691 | 18 | 14810028  | 14810028  | A | G | SNP | <i>ANKRD30B</i>        | ENST00000358984 | 1  | intronic                    | c.2313+1450 | e25+1450 | tier3 | 107  | 0 | 0.000 | 357  | 31  | 0.080 |
| 639691 | 18 | 20979505  | 20979505  | T | C | SNP | <i>TMEM241</i>         | ENST00000383233 | -1 | intronic                    | c.279+25    | e4+25    | tier3 | 49   | 0 | 0.000 | 89   | 33  | 0.271 |
| 639691 | 19 | 11564674  | 11564674  | G | T | SNP | <i>ELAVL3</i>          | ENST00000359227 | -1 | 3_prime_untranslated_region | c.*667      | NULL     | tier4 | 41   | 1 | 0.023 | 57   | 22  | 0.279 |
| 639691 | 19 | 49548481  | 49548481  | C | T | SNP | <i>CGB5</i>            | ENST00000301408 | 1  | missense                    | c.428       | p.A143V  | tier1 | 69   | 1 | 0.014 | 74   | 21  | 0.221 |
| 639691 | 19 | 54742838  | 54742838  | G | A | SNP | <i>LILRA6</i>          | ENST00000245621 | -1 | silent                      | c.1386      | p.A462   | tier1 | 187  | 0 | 0.000 | 276  | 17  | 0.058 |
| 639691 | 21 | 38885295  | 38885295  | G | T | SNP | <i>DYRK1A</i>          | ENST00000339659 | 1  | 3_prime_untranslated_region | c.*461      | NULL     | tier3 | 161  | 0 | 0.000 | 226  | 21  | 0.084 |
| 639691 | 22 | 23223246  | 23223246  | A | T | SNP | <i>IGLV3-1</i>         | ENST00000390319 | 1  | intronic                    | c.47-31     | e2-31    | tier3 | 32   | 0 | 0.000 | 35   | 22  | 0.386 |
| 639691 | 22 | 23223346  | 23223346  | T | C | SNP | <i>IGLV3-1</i>         | ENST00000390319 | 1  | missense                    | c.116       | p.I39T   | tier1 | 53   | 0 | 0.000 | 49   | 8   | 0.140 |
| 639691 | 22 | 23223372  | 23223372  | G | A | SNP | <i>IGLV3-1</i>         | ENST00000390319 | 1  | missense                    | c.142       | p.D48N   | tier1 | 50   | 0 | 0.000 | 46   | 11  | 0.193 |
| 639691 | 22 | 23223397  | 23223397  | A | C | SNP | <i>IGLV3-1</i>         | ENST00000390319 | 1  | missense                    | c.167       | p.Q56P   | tier1 | 58   | 0 | 0.000 | 58   | 11  | 0.159 |
| 639691 | 22 | 23223436  | 23223436  | A | G | SNP | <i>IGLV3-1</i>         | ENST00000390319 | 1  | missense                    | c.206       | p.D69G   | tier1 | 56   | 0 | 0.000 | 74   | 14  | 0.159 |
| 639691 | 22 | 23223446  | 23223446  | G | C | SNP | <i>IGLV3-1</i>         | ENST00000390319 | 1  | silent                      | c.216       | p.R72    | tier1 | 57   | 0 | 0.000 | 74   | 16  | 0.178 |
| 639691 | 22 | 23223480  | 23223480  | A | C | SNP | <i>IGLV3-1</i>         | ENST00000390319 | 1  | missense                    | c.250       | p.N84H   | tier1 | 53   | 0 | 0.000 | 67   | 21  | 0.236 |
| 639691 | 22 | 23660791  | 23660791  | C | T | SNP | <i>ENSG00000236611</i> | ENST00000450776 | 1  | 5_prime_flanking_region     | c.-8012     | NULL     | tier3 | 93   | 0 | 0.000 | 133  | 13  | 0.089 |
| 639691 | X  | 15841049  | 15841049  | G | T | SNP | <i>ZRSR2</i>           | ENST00000307771 | 1  | missense                    | c.1133      | p.R378L  | tier1 | 493  | 0 | 0.000 | 758  | 22  | 0.028 |
| 639691 | X  | 18323300  | 18323300  | C | A | SNP | <i>SCML2</i>           | ENST00000251900 | -1 | silent                      | c.522       | p.V174   | tier1 | 383  | 0 | 0.000 | 732  | 23  | 0.030 |
| 639691 | X  | 48163116  | 48163116  | G | T | SNP | <i>SSX9</i>            | ENST00000608568 | -1 | 5_prime_untranslated_region | c.-48163116 | NULL     | tier3 | 216  | 0 | 0.000 | 346  | 17  | 0.046 |
| 639691 | X  | 62857793  | 62857793  | G | T | SNP | <i>ARHGEF9</i>         | ENST00000253401 | -1 | 3_prime_untranslated_region | c.*115      | NULL     | tier4 | 318  | 4 | 0.012 | 500  | 37  | 0.069 |
| 639691 | X  | 69455923  | 69455923  | C | T | SNP | <i>AWA1</i>            | ENST00000374521 | 1  | silent                      | c.189       | p.G63    | tier1 | 95   | 0 | 0.000 | 116  | 12  | 0.094 |
| 639691 | X  | 101972409 | 101972409 | T | C | SNP | <i>GPRASP2</i>         | ENST00000332262 | 1  | 3_prime_untranslated_region | c.*95       | NULL     | tier3 | 72   | 1 | 0.014 | 156  | 67  | 0.300 |
| 639691 | X  | 147031603 | 147031603 | T | - | DEL | <i>FMR1</i>            | ENST00000370475 | 1  | 3_prime_untranslated_region | c.*1239     | NULL     | tier3 | 79   | 0 | 0.000 | 294  | 30  | 0.093 |
| 639691 | X  | 153134255 | 153134255 | C | G | SNP | <i>L1CAM</i>           | ENST00000543994 | -1 | intronic                    | c.1385+41   | e11+41   | tier3 | 64   | 0 | 0.000 | 76   | 21  | 0.217 |
| 678913 | 1  | 155884156 | 155884156 | A | - | DEL | <i>KIAA0907</i>        | ENST00000368320 | -1 | 3_prime_untranslated_region | c.*1458     | NULL     | tier3 | 56   | 0 | 0.000 | 74   | 14  | 0.159 |
| 678913 | 2  | 96557526  | 96557526  | T | A | SNP | <i>ANKRD36C</i>        | ENST00000456556 | -1 | intronic                    | c.2785-41   | e46-41   | tier3 | 301  | 3 | 0.010 | 592  | 33  | 0.053 |
| 678913 | 3  | 78700929  | 78700929  | C | A | SNP | <i>ROBO1</i>           | ENST00000464233 | -1 | missense                    | c.2765      | p.R922L  | tier1 | 130  | 2 | 0.015 | 160  | 82  | 0.337 |
| 678913 | 3  | 78700930  | 78700930  | G | T | SNP | <i>ROBO1</i>           | ENST00000464233 | -1 | missense                    | c.2764      | p.R922S  | tier1 | 131  | 2 | 0.015 | 160  | 84  | 0.343 |
| 678913 | 5  | 150407642 | 150407642 | T | G | SNP | <i>GPX3</i>            | ENST00000388825 | 1  | missense                    | c.632       | p.I211S  | tier1 | 85   | 1 | 0.012 | 121  | 66  | 0.353 |
| 678913 | 6  | 33261595  | 33261595  | G | A | SNP | <i>RGL2</i>            | ENST00000497454 | -1 | silent                      | c.1485      | p.L495   | tier1 | 131  | 2 | 0.015 | 112  | 79  | 0.414 |
| 678913 | 7  | 116166678 | 116166678 | G | T | SNP | <i>CAV1</i>            | ENST00000341049 | 1  | missense                    | c.130       | p.A44S   | tier1 | 70   | 2 | 0.028 | 91   | 66  | 0.418 |
| 678913 | 7  | 141321598 | 141321598 | C | A | SNP | <i>AGK</i>             | ENST00000355413 | 1  | silent                      | c.585       | p.I195   | tier1 | 90   | 2 | 0.022 | 132  | 75  | 0.359 |
| 678913 | 7  | 151945083 | 151945083 | C | T | SNP | <i>KMT2C</i>           | ENST00000355193 | -1 | missense                    | c.2436      | p.M812I  | tier1 | 2504 | 5 | 0.002 | 5543 | 178 | 0.031 |
| 678913 | 12 | 2912387   | 2912387   | C | T | SNP | <i>FKBP4</i>           | ENST0000001008  | 1  | missense                    | c.1343      | p.T448M  | tier1 | 57   | 0 | 0.000 | 60   | 38  | 0.388 |
| 678913 | 12 | 39761659  | 39761659  | T | C | SNP | <i>KIF21A</i>          | ENST00000395670 | -1 | intronic                    | c.600+26    | e4+26    | tier3 | 43   | 0 | 0.000 | 66   | 44  | 0.400 |
| 678913 | 15 | 50784950  | 50784950  | C | T | SNP | <i>USP8</i>            | ENST00000307179 | 1  | missense                    | c.2287      | p.R763W  | tier1 | 67   | 0 | 0.000 | 117  | 22  | 0.158 |
| 678913 | 16 | 5040788   | 5040788   | C | T | SNP | <i>SEC14L5</i>         | ENST00000251170 | 1  | silent                      | c.366       | p.D122   | tier1 | 118  | 0 | 0.000 | 123  | 88  | 0.415 |
| 678913 | 17 | 58740533  | 58740533  | A | - | DEL | <i>PPM1D</i>           | ENST00000305921 | 1  | frame_shift_del             | c.1438      | p.A481fs | tier1 | 63   | 0 | 0.000 | 82   | 62  | 0.431 |
| 678913 | 20 | 29628225  | 29628225  | A | G | SNP | <i>FRG1B</i>           | ENST00000278882 | 1  | splice_site                 | c.229-2     | e4-2     | tier1 | 602  | 5 | 0.008 | 1566 | 51  | 0.032 |
| 678913 | 20 | 30618789  | 30618789  | C | T | SNP | <i>LOC101929636</i>    | ENST00000449519 | -1 | rna                         | NULL        | NULL     | tier1 | 133  | 1 | 0.008 | 147  | 79  | 0.350 |
| 678913 | 21 | 27542825  | 27542825  | G | C | SNP | <i>APP</i>             | ENST00000346798 | -1 | intronic                    | c.57+57     | e1+57    | tier2 | 39   | 0 | 0.000 | 52   | 20  | 0.278 |
| 715413 | 1  | 172378884 | 172378884 | - | T | INS | <i>DNM3</i>            | ENST00000358155 | 1  | 3_prime_untranslated_region | c.*1903     | NULL     | tier3 | 12   | 0 | 0.000 | 65   | 41  | 0.387 |
| 715413 | 1  | 201781078 | 201781078 | A | C | SNP | <i>NAV1</i>            | ENST00000367296 | 1  | missense                    | c.5000      | p.N1667T | tier1 | 315  | 2 | 0.006 | 977  | 64  | 0.062 |
| 715413 | 6  | 325294    | 325294    | A | G | SNP | <i>DUSP22</i>          | ENST00000604971 | 1  | 5_prime_untranslated_region | c.-22855    | NULL     | tier3 | 212  | 3 | 0.014 | 579  | 41  | 0.066 |
| 715413 | 6  | 32548143  | 32548143  | T | C | SNP | <i>HLA-DRB1</i>        | ENST00000360004 | -1 | intronic                    | c.764-96    | e5-96    | tier3 | 36   | 1 | 0.027 | 90   | 29  | 0.244 |
| 715413 | 6  | 32548146  | 32548146  | C | T | SNP | <i>HLA-DRB1</i>        | ENST00000360004 | -1 | intronic                    | c.764-99    | e5-99    | tier3 | 35   | 1 | 0.028 | 82   | 29  |       |

|        |    |           |           |   |   |     |                        |                 |    |                             |              |           |       |     |    |       |      |     |       |
|--------|----|-----------|-----------|---|---|-----|------------------------|-----------------|----|-----------------------------|--------------|-----------|-------|-----|----|-------|------|-----|-------|
| 715413 | 20 | 29612347  | 29612347  | C | A | SNP | <i>FRG1B</i>           | ENST00000482423 | 1  | rna                         | NULL         | NULL      | tier1 | 250 | 1  | 0.004 | 815  | 51  | 0.059 |
| 715413 | X  | 34961763  | 34961763  | A | C | SNP | <i>FAM47B</i>          | ENST00000329357 | 1  | missense                    | c.815        | p.H272P   | tier1 | 422 | 2  | 0.005 | 1081 | 47  | 0.041 |
| 715413 | X  | 154009603 | 154009603 | G | A | SNP | <i>MPP1</i>            | ENST00000482757 | -1 | 5_prime_untranslated_region | c.-154009603 | NULL      | tier3 | 62  | 0  | 0.000 | 137  | 17  | 0.110 |
| 717045 | 1  | 32381592  | 32381592  | T | A | SNP | <i>PTP4A2</i>          | ENST00000344035 | -1 | splice_region               | c.97-4       | e2-4      | tier4 | 122 | 1  | 0.008 | 141  | 15  | 0.096 |
| 717045 | 1  | 47548156  | 47548156  | G | A | SNP | <i>CYP4Z1</i>          | ENST00000334194 | 1  | intronic                    | c.492+23     | e4+23     | tier3 | 89  | 2  | 0.022 | 80   | 52  | 0.394 |
| 717045 | 1  | 200878061 | 200878061 | G | A | SNP | <i>C1orf106</i>        | ENST00000367342 | 1  | missense                    | c.1033       | p.E345K   | tier1 | 51  | 1  | 0.019 | 60   | 49  | 0.450 |
| 717045 | 1  | 216678795 | 216678796 | - | T | INS | <i>ESRRG</i>           | ENST00000408911 | -1 | 3_prime_untranslated_region | c.*1486      | NULL      | tier3 | 66  | 0  | 0.000 | 70   | 9   | 0.114 |
| 717045 | 2  | 32666548  | 32666548  | T | G | SNP | <i>BIRC6</i>           | ENST00000421745 | 1  | intronic                    | c.3944+18    | e17+18    | tier3 | 123 | 3  | 0.024 | 79   | 51  | 0.392 |
| 717045 | 2  | 122368248 | 122368248 | T | G | SNP | <i>CLASP1</i>          | ENST00000263710 | -1 | intronic                    | c.1-4492     | e1-4492   | tier4 | 70  | 1  | 0.014 | 87   | 17  | 0.160 |
| 717045 | 2  | 131947387 | 131947387 | G | T | SNP | <i>PLEKHB2</i>         | ENST00000303908 | 1  | intronic                    | c.423+56823  | e5+56823  | tier3 | 463 | 6  | 0.013 | 412  | 24  | 0.055 |
| 717045 | 2  | 132290441 | 132290441 | G | A | SNP | <i>CCDC74A</i>         | ENST00000295171 | 1  | missense                    | c.881        | p.R294Q   | tier1 | 96  | 0  | 0.000 | 171  | 16  | 0.086 |
| 717045 | 2  | 179481333 | 179481333 | A | T | SNP | <i>TTN</i>             | ENST00000342992 | -1 | nonsense                    | c.40481      | p.L13494* | tier1 | 97  | 1  | 0.010 | 84   | 47  | 0.359 |
| 717045 | 2  | 198266834 | 198266834 | T | C | SNP | <i>SF3B1</i>           | ENST00000335508 | -1 | missense                    | c.2098       | p.K700E   | tier1 | 308 | 4  | 0.013 | 303  | 204 | 0.401 |
| 717045 | 2  | 217280235 | 217280235 | T | C | SNP | <i>SMARCAL1</i>        | ENST00000357276 | 1  | missense                    | c.808        | p.Y270H   | tier1 | 36  | 1  | 0.027 | 25   | 19  | 0.432 |
| 717045 | 3  | 27208497  | 27208497  | A | T | SNP | <i>NEK10</i>           | ENST00000383771 | -1 | intronic                    | c.768-4268   | e8-4268   | tier3 | 43  | 0  | 0.000 | 10   | 19  | 0.655 |
| 717045 | 3  | 71355167  | 71355167  | T | C | SNP | <i>FOXP1</i>           | ENST00000318789 | -1 | intronic                    | c.1-6136     | e1-6136   | tier2 | 31  | 0  | 0.000 | 33   | 12  | 0.267 |
| 717045 | 4  | 25407313  | 25407313  | G | A | SNP | <i>ANAPC4</i>          | ENST00000510092 | 1  | intronic                    | c.1320+69    | e17+69    | tier3 | 36  | 0  | 0.000 | 22   | 9   | 0.290 |
| 717045 | 4  | 105393360 | 105393360 | C | T | SNP | <i>CXXC4</i>           | ENST00000466963 | -1 | rna                         | NULL         | NULL      | tier1 | 55  | 0  | 0.000 | 26   | 15  | 0.357 |
| 717045 | 6  | 129475728 | 129475728 | G | A | SNP | <i>LAMA2</i>           | ENST00000421865 | 1  | missense                    | c.1106       | p.R369H   | tier1 | 204 | 0  | 0.000 | 138  | 64  | 0.317 |
| 717045 | 7  | 73973313  | 73973313  | G | A | SNP | <i>GTF2IRD1</i>        | ENST00000265755 | 1  | missense                    | c.2275       | p.G759S   | tier1 | 62  | 0  | 0.000 | 43   | 42  | 0.494 |
| 717045 | 7  | 151878771 | 151878771 | T | C | SNP | <i>KMT2C</i>           | ENST00000355193 | -1 | silent                      | c.6174       | p.G2058   | tier1 | 694 | 10 | 0.014 | 649  | 333 | 0.338 |
| 717045 | 8  | 9639151   | 9639151   | A | G | SNP | <i>TNKS</i>            | ENST00000310430 | 1  | 3_prime_untranslated_region | c.*4905      | NULL      | tier3 | 87  | 1  | 0.011 | 74   | 47  | 0.388 |
| 717045 | 10 | 61666207  | 61666207  | G | A | SNP | <i>CCDC6</i>           | ENST00000263102 | -1 | 5_prime_untranslated_region | c.-25        | NULL      | tier2 | 15  | 0  | 0.000 | 6    | 6   | 0.500 |
| 717045 | 10 | 71620368  | 71620368  | C | T | SNP | <i>COL13A1</i>         | ENST00000356340 | 1  | intronic                    | c.365-11564  | e3-11564  | tier3 | 138 | 4  | 0.028 | 137  | 81  | 0.370 |
| 717045 | 11 | 1770224   | 1770224   | C | G | SNP | <i>IFITM10</i>         | ENST00000482459 | -1 | rna                         | NULL         | NULL      | tier1 | 8   | 0  | 0.000 | 1    | 4   | 0.800 |
| 717045 | 12 | 49724201  | 49724201  | G | A | SNP | <i>TROAP</i>           | ENST00000257909 | 1  | missense                    | c.1573       | p.A525T   | tier1 | 47  | 3  | 0.060 | 40   | 30  | 0.423 |
| 717045 | 14 | 88945999  | 88945999  | G | A | SNP | <i>PTPN21</i>          | ENST00000328736 | -1 | silent                      | c.1776       | p.P592    | tier1 | 167 | 1  | 0.006 | 105  | 83  | 0.442 |
| 717045 | 14 | 106805481 | 106805481 | G | A | SNP | <i>IGHV4-31</i>        | ENST00000438142 | -1 | missense                    | c.82         | p.P28S    | tier1 | 210 | 3  | 0.014 | 259  | 28  | 0.097 |
| 717045 | 14 | 106805485 | 106805485 | C | G | SNP | <i>IGHV4-31</i>        | ENST00000438142 | -1 | silent                      | c.78         | p.S26     | tier1 | 213 | 3  | 0.014 | 268  | 28  | 0.095 |
| 717045 | 14 | 106805502 | 106805502 | C | G | SNP | <i>IGHV4-31</i>        | ENST00000438142 | -1 | missense                    | c.61         | p.V21L    | tier1 | 232 | 2  | 0.009 | 274  | 27  | 0.090 |
| 717045 | 14 | 106805533 | 106805533 | A | C | SNP | <i>IGHV4-31</i>        | ENST00000438142 | -1 | intronic                    | c.47-17      | e2-17     | tier3 | 258 | 2  | 0.008 | 319  | 24  | 0.070 |
| 717045 | 15 | 101432730 | 101432730 | G | C | SNP | <i>ALDH1A3</i>         | ENST00000329841 | 1  | missense                    | c.361        | p.D121H   | tier1 | 88  | 3  | 0.033 | 70   | 59  | 0.457 |
| 717045 | 16 | 66432084  | 66432084  | G | T | SNP | <i>CDH5</i>            | ENST00000341529 | 1  | intronic                    | c.1485+75    | e8+75     | tier3 | 41  | 0  | 0.000 | 40   | 33  | 0.452 |
| 717045 | 17 | 40731892  | 40731892  | C | T | SNP | <i>FAM134C</i>         | ENST00000309428 | -1 | 3_prime_untranslated_region | c.*1939      | NULL      | tier3 | 111 | 5  | 0.043 | 82   | 38  | 0.317 |
| 717045 | 17 | 58979988  | 58979988  | G | T | SNP | <i>BCAS3</i>           | ENST00000390652 | 1  | missense                    | c.746        | p.R249L   | tier1 | 118 | 0  | 0.000 | 75   | 7   | 0.085 |
| 717045 | 19 | 1046259   | 1046259   | C | G | SNP | <i>ABCA7</i>           | ENST00000263094 | 1  | silent                      | c.1476       | p.P492    | tier1 | 165 | 2  | 0.012 | 118  | 70  | 0.368 |
| 717045 | 20 | 39992390  | 39992390  | C | T | SNP | <i>EMILIN3</i>         | ENST00000332312 | -1 | silent                      | c.402        | p.T134    | tier1 | 102 | 1  | 0.010 | 91   | 74  | 0.449 |
| 717045 | 20 | 61444605  | 61444605  | A | G | SNP | <i>OGFR</i>            | ENST00000290291 | 1  | silent                      | c.1638       | p.P546    | tier1 | 27  | 0  | 0.000 | 30   | 10  | 0.250 |
| 717045 | 22 | 24400302  | 24400302  | G | A | SNP | <i>GSTTP2</i>          | ENST00000389399 | -1 | splice_region               | c.NULL       | NULL      | tier3 | 121 | 0  | 0.000 | 223  | 21  | 0.086 |
| 732217 | 1  | 1896486   | 1896486   | G | A | SNP | <i>C1orf222</i>        | ENST00000604159 | -1 | silent                      | c.171        | p.D57     | tier1 | 34  | 0  | 0.000 | 49   | 39  | 0.443 |
| 732217 | 1  | 19549161  | 19549161  | C | T | SNP | <i>EMC1</i>            | ENST00000486238 | -1 | missense                    | c.95         | p.R32K    | tier1 | 29  | 1  | 0.033 | 42   | 39  | 0.482 |
| 732217 | 1  | 20518895  | 20518895  | C | T | SNP | <i>UBXN10</i>          | ENST00000375099 | 1  | 3_prime_untranslated_region | c.*998       | NULL      | tier3 | 81  | 0  | 0.000 | 97   | 63  | 0.389 |
| 732217 | 1  | 46079781  | 46079781  | A | G | SNP | <i>NASP</i>            | ENST00000402363 | 1  | missense                    | c.1526       | p.N509S   | tier1 | 82  | 3  | 0.035 | 144  | 125 | 0.465 |
| 732217 | 1  | 237777658 | 237777658 | A | - | DEL | <i>RYR2</i>            | ENST00000360064 | 1  | frame_shift_del             | c.5224       | p.K1743fs | tier1 | 42  | 2  | 0.046 | 55   | 28  | 0.337 |
| 732217 | 2  | 112588927 | 112588927 | C | G | SNP | <i>ANAPC1</i>          | ENST00000341068 | -1 | missense                    | c.2561       | p.G854A   | tier1 | 195 | 8  | 0.039 | 400  | 328 | 0.451 |
| 732217 | 2  | 236949476 | 236949476 | G | A | SNP | <i>AGAP1</i>           | ENST00000304032 | 1  | missense                    | c.1882       | p.E628K   | tier1 | 51  | 3  | 0.056 | 113  | 51  | 0.311 |
| 732217 | 4  | 106164914 | 106164914 | G | A | SNP | <i>TET2</i>            | ENST00000380013 | 1  | missense                    | c.3782       | p.R1261H  | tier1 | 171 | 4  | 0.023 | 30   | 571 | 0.945 |
| 732217 | 4  | 125593542 | 125593542 | A | G | SNP | <i>ANKRD50</i>         | ENST00000504087 | -1 | missense                    | c.890        | p.I297T   | tier1 | 71  | 3  | 0.041 | 7    | 145 | 0.954 |
| 732217 | 5  | 69826356  | 69826356  | G | A | SNP | <i>ENSG00000250918</i> | ENST00000509075 | 1  | 3_prime_untranslated_region | c.*69826356  | NULL      | tier3 | 166 | 4  | 0.023 | 720  | 87  | 0.107 |
| 732217 | 5  | 98109985  | 98109985  | G | A | SNP | <i>RGMB</i>            | ENST00000308234 | 1  | intronic                    | c.259+75     | e2+75     | tier2 | 7   | 0  | 0.000 | 1    | 6   | 0.857 |
| 732217 | 5  | 171723836 | 171723836 | G | A | SNP | <i>UBTD2</i>           | ENST00000393792 | -1 | 5_prime_flanking_region     | c.-13167     | NULL      | tier2 | 73  | 0  | 0.000 | 140  | 19  | 0.120 |
| 732217 | 6  | 150064734 | 150064734 | A | - | DEL | <i>NUP43</i>           | ENST00000340413 | -1 | intronic                    | c.321+40     | e3+40     | tier4 | 48  | 0  | 0.000 | 134  | 26  | 0.163 |
| 732217 | 7  | 31378474  | 31378474  | G | A | SNP | <i>NEUROD6</i>         | ENST00000297142 | -1 | nonsense                    | c.409        | p.R137*   | tier1 | 121 | 3  | 0.024 | 153  | 97  | 0.388 |
| 732217 | 7  | 42003680  | 42003680  | A | T | SNP | <i>GLI3</i>            | ENST00000479210 | -1 | rna                         | NULL         | NULL      | tier1 | 71  | 1  | 0.014 | 251  | 51  | 0.168 |
| 732217 | 7  | 42003681  | 42003681  | A | T | SNP | <i>GLI3</i>            | ENST00000479210 | -1 | rna                         | NULL         | NULL      | tier1 | 74  | 0  | 0.000 | 271  | 25  | 0.084 |
| 732217 | 7  | 48545892  | 48545892  | G | A | SNP | <i>ABCA13</i>          | ENST00000435803 | 1  | intronic                    | c.13292-40   | e49-40    | tier3 | 32  | 1  | 0.030 | 62   | 38  | 0.380 |
| 732217 | 7  | 73475359  | 73475359  | T | C | SNP | <i>ELN</i>             | ENST00000358929 | 1  | intronic                    | c.1952-72    | e27-72    | tier4 | 46  | 0  | 0.000 | 86   | 70  | 0.449 |
| 732217 | 7  | 142223845 | 142223845 | T | C | SNP | <i>TRBV11-1</i>        | ENST00000390367 | -1 | missense                    | c.322        | p.M108V   | tier1 | 47  | 0  | 0.000 | 96   | 15  | 0.135 |
| 732217 | 8  | 52732382  | 52732382  | C | T | SNP | <i>PCMTD1</i>          | ENST00000360540 | -1 | 3_prime_untranslated_region | c.*529       | NULL      | tier3 | 47  | 0  | 0.000 | 141  | 23  | 0.139 |
| 732217 | 8  | 77764819  | 77764819  | C | - | DEL | <i>ZFX4</i>            | ENST00000521891 | 1  | frame_shift_del             | c.5662       | p.Q1888fs | tier1 | 44  | 1  | 0.022 | 56   | 47  | 0.456 |
| 732217 | 8  | 145255402 | 145255402 | G | A | SNP | <i>MROH1</i>           | ENST00000326134 | 1  | missense                    | c.1099       | p.V367M   | tier1 | 28  | 0  | 0.000 | 33   | 34  | 0.500 |
| 732217 | 9  | 14788     | 14788     | G | A | SNP | <i>ENSG00000181404</i> | ENST00000330546 | -1 | 5_prime_untranslated_region | c.-14788     | NULL      | tier3 | 397 | 8  | 0.020 | 655  | 56  | 0.078 |
| 732217 | 9  | 33386977  | 33386977  | G | T | SNP | <i>AQP7</i>            | ENST00000297988 | -1 | silent                      | c.258        | p.G86     | tier1 | 304 | 4  | 0.013 | 802  | 125 | 0.135 |
| 732217 | 9  | 130897518 | 130897518 | A | C | SNP | <i>PTGES2</i>          | ENST00000338961 | -1 | 5_prime_flanking_region     | c.-7522      | NULL      | tier4 | 139 | 2  | 0.014 | 267  | 115 | 0.300 |
| 732217 | 10 | 102296470 | 102296470 | T | C | SNP | <i>HIF1AN</i>          | ENST00000299163 | 1  | intronic                    | c.428+52     | e2+52     | tier2 | 21  | 0  | 0.000 | 35   | 43  | 0.551 |
| 732217 | 10 | 119003712 | 119003712 | C | T | SNP | <i>SLC18A2</i>         | ENST00000298472 | 1  | missense                    | c.352        | p.P118S   | tier1 | 41  | 2  | 0.047 | 44   | 40  | 0.476 |
| 732217 | 11 | 14279305  | 14279305  | G | T | SNP | <i>SPON1</i>           | ENST00000310358 | 1  | rna                         | NULL         | NULL      | tier1 | 55  | 2  | 0.035 | 80   | 65  | 0.445 |
| 732217 | 11 | 59244984  | 592449    |   |   |     |                        |                 |    |                             |              |           |       |     |    |       |      |     |       |



|        |    |           |           |                             |   |      |                        |                 |    |                             |                   |          |       |     |    |       |     |     |       |
|--------|----|-----------|-----------|-----------------------------|---|------|------------------------|-----------------|----|-----------------------------|-------------------|----------|-------|-----|----|-------|-----|-----|-------|
| 732217 | 17 | 263412    | 263412    | G                           | A | SNP  | <i>C17orf97</i>        | ENST00000360127 | 1  | missense                    | c.778             | p.E260K  | tier1 | 322 | 6  | 0.018 | 706 | 59  | 0.077 |
| 732217 | 17 | 15984046  | 15984047  | -                           | A | INS  | <i>NCOR1</i>           | ENST00000268712 | -1 | splice_region_ins           | c.3178-6_3178-5   | e23-5    | tier2 | 271 | 5  | 0.018 | 466 | 219 | 0.320 |
| 732217 | 17 | 72363579  | 72363579  | T                           | A | SNP  | <i>GPR142</i>          | ENST00000582579 | 1  | 5_prime_untranslated_region | c.-66             | NULL     | tier3 | 17  | 0  | 0.000 | 39  | 28  | 0.418 |
| 732217 | 17 | 72948180  | 72948180  | C                           | T | SNP  | <i>HID1</i>            | ENST00000425042 | -1 | intronic                    | c.2145-22         | e18-22   | tier3 | 33  | 0  | 0.000 | 35  | 18  | 0.340 |
| 732217 | 17 | 74732959  | 74732959  | G                           | A | SNP  | <i>SRSF2</i>           | ENST00000359995 | -1 | missense                    | c.284             | p.P95L   | tier1 | 164 | 5  | 0.030 | 254 | 232 | 0.476 |
| 732217 | 19 | 41557967  | 41557967  | C                           | T | SNP  | <i>CYP2G2P</i>         | ENST00000594920 | -1 | 5_prime_untranslated_region | c.-41557967       | NULL     | tier3 | 96  | 2  | 0.020 | 110 | 115 | 0.509 |
| 732217 | 20 | 31022441  | 31022442  | -                           | G | INS  | <i>ASXL1</i>           | ENST00000375687 | 1  | frame_shift_ins             | c.1926_1927       | p.G645fs | tier1 | 553 | 14 | 0.025 | 689 | 347 | 0.335 |
| 732217 | 21 | 36164760  | 36164761  | -                           | - | CCAT | <i>RUNX1</i>           | ENST00000300305 | -1 | frame_shift_ins             | c.1115_1114       | p.G372fs | tier1 | 764 | 7  | 0.009 | 691 | 414 | 0.375 |
| 732217 | 21 | 47976820  | 47976820  | T                           | - | DEL  | <i>DIP2A</i>           | ENST00000481883 | 1  | 3_prime_untranslated_region | c.*47976820       | NULL     | tier3 | 56  | 0  | 0.000 | 145 | 20  | 0.121 |
| 732217 | X  | 106482271 | 106482271 | T                           | C | SNP  | <i>PIH1D3</i>          | ENST00000336387 | 1  | intronic                    | c.515+34          | e5+34    | tier3 | 40  | 2  | 0.048 | 13  | 120 | 0.902 |
| 754150 | 1  | 10683092  | 10683092  | T                           | C | SNP  | <i>PEX14</i>           | ENST00000356607 | 1  | missense                    | c.401             | p.L134P  | tier1 | 160 | 0  | 0.000 | 154 | 22  | 0.124 |
| 754150 | 1  | 115401238 | 115401239 | -                           | A | INS  | <i>SYCP1</i>           | ENST00000369518 | 1  | frame_shift_ins             | c.362_363         | p.S122fs | tier1 | 65  | 0  | 0.000 | 98  | 12  | 0.109 |
| 754150 | 2  | 46707812  | 46707812  | G                           | A | SNP  | <i>TMEM247</i>         | ENST00000434431 | 1  | missense                    | c.386             | p.R129Q  | tier1 | 65  | 0  | 0.000 | 57  | 8   | 0.123 |
| 754150 | 2  | 149793838 | 149793838 | G                           | A | SNP  | <i>KIF5C</i>           | ENST00000435030 | 1  | missense                    | c.332             | p.R111Q  | tier1 | 52  | 0  | 0.000 | 55  | 10  | 0.154 |
| 754150 | 2  | 208394531 | 208394531 | G                           | T | SNP  | <i>CREB1</i>           | ENST00000430624 | 1  | 5_prime_untranslated_region | c.-25829          | NULL     | tier2 | 6   | 0  | 0.000 | 1   | 5   | 0.833 |
| 754150 | 2  | 219221645 | 219221645 | C                           | G | SNP  | <i>C2orf62</i>         | ENST00000289388 | 1  | intronic                    | c.25+13           | e1+13    | tier3 | 171 | 0  | 0.000 | 119 | 11  | 0.085 |
| 754150 | 2  | 239973727 | 239973727 | T                           | A | SNP  | <i>HDAC4</i>           | ENST00000345617 | -1 | 3_prime_untranslated_region | c.*1066           | NULL     | tier3 | 180 | 4  | 0.022 | 109 | 73  | 0.401 |
| 754150 | 3  | 52012429  | 52012429  | T                           | A | SNP  | <i>ABHD14A</i>         | ENST00000474575 | 1  | 3_prime_untranslated_region | c.*52012429       | NULL     | tier3 | 137 | 1  | 0.007 | 104 | 22  | 0.175 |
| 754150 | 3  | 69915190  | 69915190  | G                           | A | SNP  | <i>MITF</i>            | ENST00000448226 | 1  | intronic                    | c.105-13095       | e2-13095 | tier3 | 82  | 0  | 0.000 | 81  | 17  | 0.174 |
| 754150 | 3  | 182933850 | 182933850 | G                           | C | SNP  | <i>MCF2L2</i>          | ENST00000328913 | -1 | missense                    | c.2403            | p.F801L  | tier1 | 130 | 0  | 0.000 | 146 | 11  | 0.070 |
| 754150 | 4  | 4190576   | 4190576   | C                           | G | SNP  | <i>OTOP1</i>           | ENST00000296358 | -1 | missense                    | c.1793            | p.R598P  | tier1 | 62  | 0  | 0.000 | 97  | 14  | 0.126 |
| 754150 | 4  | 4190577   | 4190577   | G                           | C | SNP  | <i>OTOP1</i>           | ENST00000296358 | -1 | missense                    | c.1792            | p.R598G  | tier1 | 60  | 0  | 0.000 | 96  | 14  | 0.127 |
| 754150 | 4  | 4190595   | 4190595   | G                           | C | SNP  | <i>OTOP1</i>           | ENST00000296358 | -1 | missense                    | c.1774            | p.P592A  | tier1 | 63  | 0  | 0.000 | 90  | 14  | 0.135 |
| 754150 | 4  | 9389009   | 9389009   | A                           | G | SNP  | <i>ENSG00000219492</i> | ENST00000508324 | -1 | splice_region               | c.13-8            | e2-8     | tier3 | 497 | 13 | 0.026 | 243 | 176 | 0.419 |
| 754150 | 4  | 20852133  | 20852133  | G                           | T | SNP  | <i>KCNIP4</i>          | ENST00000515373 | -1 | 5_prime_untranslated_region | c.-20852133       | NULL     | tier3 | 110 | 4  | 0.035 | 57  | 46  | 0.447 |
| 754150 | 4  | 25262265  | 25262265  | C                           | T | SNP  | <i>PI4K2B</i>          | ENST00000264864 | 1  | intronic                    | c.978+52          | e6+52    | tier4 | 41  | 1  | 0.024 | 54  | 17  | 0.239 |
| 754150 | 4  | 25677760  | 25677760  | G                           | A | SNP  | <i>SLC34A2</i>         | ENST00000382051 | 1  | missense                    | c.1462            | p.A488T  | tier1 | 54  | 0  | 0.000 | 59  | 9   | 0.132 |
| 754150 | 5  | 26906108  | 26906108  | C                           | G | SNP  | <i>CDH9</i>            | ENST00000231021 | -1 | silent                      | c.771             | p.T257   | tier1 | 154 | 2  | 0.013 | 158 | 37  | 0.189 |
| 754150 | 5  | 55168187  | 55168187  | C                           | T | SNP  | <i>IL31RA</i>          | ENST00000447346 | 1  | missense                    | c.362             | p.T121M  | tier1 | 162 | 0  | 0.000 | 126 | 89  | 0.414 |
| 754150 | 5  | 115177743 | 115177743 | G                           | C | SNP  | <i>AP3S1</i>           | ENST00000316788 | 1  | missense                    | c.9               | p.K3N    | tier1 | 22  | 0  | 0.000 | 19  | 11  | 0.367 |
| 754150 | 5  | 139941115 | 139941115 | T                           | C | SNP  | <i>APBB3</i>           | ENST00000356738 | -1 | intronic                    | c.762+57          | e7+57    | tier2 | 96  | 3  | 0.030 | 48  | 44  | 0.478 |
| 754150 | 5  | 140554370 | 140554370 | C                           | T | SNP  | <i>PCDHB7</i>          | ENST00000231137 | 1  | missense                    | c.1954            | p.R652C  | tier1 | 829 | 7  | 0.008 | 707 | 79  | 0.100 |
| 754150 | 5  | 178413301 | 178413301 | C                           | T | SNP  | <i>GRM6</i>            | ENST00000231188 | -1 | missense                    | c.1954            | p.A652T  | tier1 | 83  | 3  | 0.035 | 65  | 43  | 0.398 |
| 754150 | 6  | 52400654  | 52400654  | A                           | C | SNP  | <i>TRAM2</i>           | ENST00000182527 | -1 | splice_region               | c.121-10          | e2-10    | tier2 | 87  | 2  | 0.023 | 73  | 58  | 0.443 |
| 754150 | 7  | 31127292  | 31127292  | T                           | C | SNP  | <i>ADCYAP1R1</i>       | ENST00000436116 | 1  | missense                    | c.85              | p.C29R   | tier1 | 108 | 0  | 0.000 | 99  | 15  | 0.132 |
| 754150 | 7  | 42005086  | 42005086  | G                           | T | SNP  | <i>GLI3</i>            | ENST00000395925 | -1 | missense                    | c.3585            | p.N1195K | tier1 | 83  | 4  | 0.046 | 58  | 42  | 0.420 |
| 754150 | 7  | 77584160  | 77584160  | T                           | - | DEL  | <i>PHTF2</i>           | ENST00000248550 | 1  | intronic                    | c.2338-15         | e19-15   | tier3 | 152 | 0  | 0.000 | 226 | 23  | 0.092 |
| 754150 | 11 | 2443297   | 2443297   | G                           | A | SNP  | <i>TRPM5</i>           | ENST00000452833 | -1 | intronic                    | c.298+74          | e2+74    | tier3 | 25  | 0  | 0.000 | 14  | 6   | 0.300 |
| 754150 | 11 | 34192643  | 34192643  | C                           | T | SNP  | <i>ABTB2</i>           | ENST00000435224 | -1 | intronic                    | c.1398-25         | e5-25    | tier3 | 71  | 0  | 0.000 | 62  | 18  | 0.225 |
| 754150 | 11 | 48346968  | 48346968  | C                           | T | SNP  | <i>OR4C3</i>           | ENST00000319856 | 1  | missense                    | c.476             | p.T159L  | tier1 | 85  | 1  | 0.012 | 98  | 23  | 0.190 |
| 754150 | 12 | 19653148  | 19653148  | A                           | T | SNP  | <i>AEBP2</i>           | ENST00000398864 | 1  | missense                    | c.1292            | p.H431L  | tier1 | 92  | 0  | 0.000 | 75  | 50  | 0.400 |
| 754150 | 12 | 50746672  | 50746672  | A                           | G | SNP  | <i>FAM186A</i>         | ENST00000327337 | -1 | missense                    | c.3943            | p.F1315L | tier1 | 285 | 4  | 0.014 | 283 | 28  | 0.090 |
| 754150 | 13 | 101712169 | 101712169 | C                           | T | SNP  | <i>NALCN</i>           | ENST00000251127 | -1 | splice_site                 | c.4905+1          | e41+1    | tier1 | 606 | 19 | 0.030 | 313 | 251 | 0.445 |
| 754150 | 14 | 91467486  | 91467486  | C                           | T | SNP  | <i>RPS6KA5</i>         | ENST00000261991 | -1 | missense                    | c.121             | p.A41T   | tier1 | 190 | 4  | 0.021 | 126 | 88  | 0.407 |
| 754150 | 15 | 76576183  | 76576183  | A                           | - | DEL  | <i>ETFA</i>            | ENST00000557943 | -1 | intronic                    | c.665-17          | e8-17    | tier3 | 30  | 0  | 0.000 | 23  | 8   | 0.258 |
| 754150 | 15 | 90631934  | 90631934  | C                           | T | SNP  | <i>IDH2</i>            | ENST00000330062 | -1 | missense                    | c.419             | p.R140Q  | tier1 | 589 | 12 | 0.020 | 280 | 269 | 0.490 |
| 754150 | 15 | 102295647 | 102295647 | C                           | G | SNP  | <i>DNM1P47</i>         | ENST00000561463 | 1  | rna                         | NULL              | NULL     | tier1 | 37  | 1  | 0.026 | 21  | 12  | 0.364 |
| 754150 | 16 | 12297294  | 12297294  | T                           | G | SNP  | <i>SNX29</i>           | ENST00000306030 | 1  | intronic                    | c.523+3754        | e6+3754  | tier3 | 572 | 7  | 0.012 | 619 | 28  | 0.043 |
| 754150 | 17 | 2595220   | 2595233   | CCCCGTGCCCGCGG              | - | DEL  | <i>CLUH</i>            | ENST00000435359 | -1 | intronic                    | c.3538-44_3538-31 | e23-31   | tier2 | 28  | 0  | 0.000 | 19  | 11  | 0.367 |
| 754150 | 17 | 74732959  | 74732959  | G                           | C | SNP  | <i>SRSF2</i>           | ENST00000359995 | -1 | missense                    | c.284             | p.P95R   | tier1 | 390 | 20 | 0.049 | 228 | 138 | 0.377 |
| 754150 | 19 | 426497    | 426497    | C                           | T | SNP  | <i>SHC2</i>            | ENST00000264554 | -1 | intronic                    | c.1175-1266       | e10-1266 | tier4 | 59  | 0  | 0.000 | 34  | 6   | 0.143 |
| 754150 | 19 | 6906516   | 6906516   | C                           | T | SNP  | <i>EMR1</i>            | ENST00000312053 | 1  | missense                    | c.1022            | p.A341V  | tier1 | 218 | 7  | 0.031 | 121 | 133 | 0.522 |
| 754150 | 19 | 15654862  | 15654862  | G                           | A | SNP  | <i>CYP4F22</i>         | ENST00000269703 | 1  | intronic                    | c.1006+14         | e7+14    | tier3 | 148 | 3  | 0.020 | 91  | 48  | 0.345 |
| 754150 | 19 | 41355820  | 41355820  | A                           | G | SNP  | <i>CYP2A6</i>          | ENST00000301141 | -1 | silent                      | c.246             | p.C82    | tier1 | 83  | 0  | 0.000 | 83  | 13  | 0.135 |
| 754150 | 19 | 41355828  | 41355828  | C                           | T | SNP  | <i>CYP2A6</i>          | ENST00000301141 | -1 | missense                    | c.238             | p.V80M   | tier1 | 78  | 0  | 0.000 | 83  | 13  | 0.135 |
| 754150 | 20 | 3127469   | 3127469   | C                           | G | SNP  | <i>FASTKD5</i>         | ENST00000380266 | -1 | missense                    | c.2248            | p.E750Q  | tier1 | 70  | 3  | 0.041 | 33  | 49  | 0.598 |
| 754150 | 20 | 29632749  | 29632749  | A                           | G | SNP  | <i>FRG1B</i>           | ENST00000278882 | 1  | intronic                    | c.536+28          | e6+28    | tier3 | 262 | 3  | 0.011 | 443 | 27  | 0.057 |
| 754150 | 20 | 29652147  | 29652147  | A                           | G | SNP  | <i>MLLT10P1</i>        | ENST00000418346 | -1 | 5_prime_flanking_region     | c.-14087          | NULL     | tier4 | 267 | 4  | 0.015 | 342 | 27  | 0.073 |
| 754150 | 20 | 31022403  | 31022425  | CACCACTGCCATAGA<br>GAGGCGGC | - | DEL  | <i>ASXL1</i>           | ENST00000375687 | 1  | frame_shift_del             | c.1888_1910       | p.H633fs | tier1 | 875 | 7  | 0.008 | 481 | 78  | 0.140 |
| 754150 | 20 | 31022417  | 31022417  | A                           | - | DEL  | <i>ASXL1</i>           | ENST00000375687 | 1  | frame_shift_del             | c.1902            | p.E635fs | tier1 | 843 | 7  | 0.008 | 390 | 45  | 0.103 |
| 754150 | 20 | 55967777  | 55967777  | G                           | C | SNP  | <i>RBM38</i>           | ENST00000356208 | 1  | missense                    | c.305             | p.R102P  | tier1 | 53  | 3  | 0.054 | 47  | 31  | 0.397 |
| 754150 | 22 | 24094823  | 24094828  | ATCCCC                      | - | DEL  | <i>MMP11</i>           | ENST00000215743 | 1  | 5_prime_flanking_region     | c.-20235          | NULL     | tier3 | 34  | 1  | 0.029 | 30  | 19  | 0.388 |
| 754150 | 22 | 50903351  | 50903351  | C                           | T | SNP  | <i>SBF1</i>            | ENST00000380817 | -1 | splice_region               | c.1333-5          | e13-5    | tier2 | 252 | 10 | 0.038 | 144 | 107 | 0.423 |
| 754150 | X  | 73064091  | 73064091  | A                           | G | SNP  | <i>XIST</i>            | ENST00000429829 | -1 | rna                         | NULL              | NULL     | tier1 | 65  | 1  | 0.015 | 13  | 67  | 0.838 |
| 754150 | X  | 123505288 | 123505288 | T                           | C | SNP  | <i>SH2D1A</i>          | ENST00000491950 | 1  | rna                         | NULL              | NULL     | tier1 | 140 | 6  | 0.041 | 22  | 143 | 0.867 |
| 769516 | 1  | 15046     | 15046     | G                           | A | SNP  | <i>WASH7P</i>          | ENST00000423562 | -1 | splice_region               | c.NULL            | NULL     | tier3 | 162 | 0  | 0.000 | 501 | 44  | 0.081 |
| 769516 | 1  | 116947126 | 116947126 | C                           | G | SNP  | <i>ATP1A1</i>          | ENST00000295598 | 1  | 3_prime_untranslated_region | c.*60             | NULL     | tier3 | 28  | 0  | 0.0   |     |     |       |

|        |    |           |           |                                                   |     |     |                 |                 |    |                             |                   |                   |       |     |   |       |      |     |       |
|--------|----|-----------|-----------|---------------------------------------------------|-----|-----|-----------------|-----------------|----|-----------------------------|-------------------|-------------------|-------|-----|---|-------|------|-----|-------|
| 769516 | 4  | 187541903 | 187541903 | C                                                 | T   | SNP | FAT1            | ENST00000441802 | -1 | missense                    | c.5837            | p.S1946N          | tier1 | 16  | 0 | 0.000 | 92   | 41  | 0.308 |
| 769516 | 5  | 15936967  | 15936967  | C                                                 | T   | SNP | FBXL7           | ENST00000504595 | 1  | missense                    | c.1148            | p.A383V           | tier1 | 13  | 0 | 0.000 | 33   | 30  | 0.476 |
| 769516 | 5  | 73168759  | 73168759  | T                                                 | A   | SNP | ARHGFEF28       | ENST00000545377 | 1  | intronic                    | c.2567-65         | e21-65            | tier3 | 30  | 0 | 0.000 | 99   | 45  | 0.313 |
| 769516 | 6  | 56466430  | 56466430  | A                                                 | T   | SNP | DST             | ENST00000370754 | -1 | silent                      | c.11259           | p.T3753           | tier1 | 78  | 0 | 0.000 | 796  | 310 | 0.280 |
| 769516 | 9  | 100137897 | 100137897 | C                                                 | G   | SNP | CCDC180         | ENST00000526038 | 1  | 3_prime_untranslated_region | c.*100137897      | NULL              | tier3 | 57  | 0 | 0.000 | 405  | 171 | 0.297 |
| 769516 | 9  | 127549340 | 127549340 | C                                                 | T   | SNP | OLFML2A         | ENST00000373580 | 1  | silent                      | c.177             | p.D59             | tier1 | 22  | 0 | 0.000 | 133  | 49  | 0.269 |
| 769516 | 11 | 376244    | 376245    | -                                                 | A   | INS | B4GALNT4        | ENST00000329962 | 1  | splice_region_ins           | c.1197-7_1197-6   | e13-6             | tier2 | 38  | 0 | 0.000 | 233  | 78  | 0.251 |
| 769516 | 11 | 68273518  | 68273518  | T                                                 | C   | SNP | PPP6R3          | ENST00000393799 | 1  | intronic                    | c.1-13451         | e1-13451          | tier3 | 47  | 0 | 0.000 | 216  | 37  | 0.146 |
| 769516 | 12 | 125478381 | 125478382 | -                                                 | CTG | INS | BRI3BP          | ENST00000341446 | 1  | in_frame_ins                | c.45_46           | p.19in_frame_insL | tier1 | 8   | 0 | 0.000 | 7    | 10  | 0.588 |
| 769516 | 13 | 32783001  | 32783001  | C                                                 | T   | SNP | FRY             | ENST00000380250 | 1  | nonsense                    | c.4030            | p.R1344*          | tier1 | 28  | 0 | 0.000 | 135  | 37  | 0.214 |
| 769516 | 14 | 59113492  | 59113492  | C                                                 | T   | SNP | DACT1           | ENST00000335867 | 1  | silent                      | c.2151            | p.Y717            | tier1 | 30  | 0 | 0.000 | 149  | 51  | 0.255 |
| 769516 | 15 | 40942716  | 40942716  | T                                                 | -   | DEL | CASC5           | ENST00000346991 | 1  | intronic                    | c.6251-26         | e19-26            | tier3 | 32  | 0 | 0.000 | 112  | 34  | 0.233 |
| 769516 | 16 | 81208267  | 81208267  | A                                                 | C   | SNP | PKD1L2          | ENST00000527937 | -1 | missense                    | c.604             | p.C202G           | tier1 | 181 | 0 | 0.000 | 693  | 288 | 0.293 |
| 769516 | 17 | 71361450  | 71361450  | T                                                 | C   | SNP | SDK2            | ENST00000392650 | -1 | missense                    | c.5252            | p.N1751S          | tier1 | 26  | 0 | 0.000 | 128  | 43  | 0.250 |
| 769516 | 17 | 74732959  | 74732959  | G                                                 | C   | SNP | SRSF2           | ENST00000359995 | -1 | missense                    | c.284             | p.P95R            | tier1 | 114 | 0 | 0.000 | 454  | 183 | 0.285 |
| 769516 | 18 | 14361468  | 14361468  | G                                                 | A   | SNP | ENSG00000265437 | ENST00000584979 | -1 | 5_prime_untranslated_region | c.-14361468       | NULL              | tier3 | 18  | 0 | 0.000 | 107  | 54  | 0.335 |
| 769516 | 22 | 19130308  | 19130308  | G                                                 | A   | SNP | DGCR14          | ENST00000252137 | -1 | missense                    | c.235             | p.R79W            | tier1 | 14  | 0 | 0.000 | 56   | 31  | 0.356 |
| 783437 | 1  | 38488507  | 38488507  | T                                                 | -   | DEL | UTP11L          | ENST00000373014 | 1  | intronic                    | c.678+26          | e7+26             | tier3 | 68  | 0 | 0.000 | 114  | 14  | 0.109 |
| 783437 | 3  | 47263926  | 47263926  | T                                                 | -   | DEL | KIF9-AS1        | ENST00000429315 | 1  | intronic                    | c.NULL            | NULL              | tier4 | 75  | 1 | 0.013 | 124  | 19  | 0.133 |
| 783437 | 3  | 50137714  | 50137714  | T                                                 | -   | DEL | RBM5            | ENST00000469838 | 1  | 3_prime_untranslated_region | c.*207            | NULL              | tier3 | 82  | 1 | 0.012 | 107  | 15  | 0.123 |
| 783437 | 6  | 31498127  | 31498127  | T                                                 | G   | SNP | DDX39B          | ENST00000462421 | -1 | rna                         | NULL              | NULL              | tier1 | 125 | 1 | 0.008 | 159  | 20  | 0.107 |
| 783437 | 6  | 102516350 | 102516350 | C                                                 | T   | SNP | GRIK2           | ENST00000421544 | 1  | silent                      | c.2091            | p.N897            | tier1 | 791 | 2 | 0.003 | 1072 | 40  | 0.036 |
| 783437 | 7  | 95818865  | 95818865  | A                                                 | -   | DEL | SLC25A13        | ENST00000416240 | -1 | intronic                    | c.848+28          | e8+28             | tier3 | 65  | 0 | 0.000 | 113  | 17  | 0.131 |
| 783437 | 8  | 143369132 | 143369132 | G                                                 | C   | SNP | TSNARE1         | ENST00000307180 | -1 | intronic                    | c.1291-3286       | e10-3286          | tier3 | 585 | 4 | 0.007 | 869  | 28  | 0.031 |
| 783437 | 9  | 131104965 | 131104965 | T                                                 | -   | DEL | TMSB4XP4        | ENST00000323496 | 1  | 3_prime_untranslated_region | c.*131104965      | NULL              | tier3 | 122 | 1 | 0.008 | 123  | 12  | 0.089 |
| 783437 | 16 | 85689387  | 85689387  | A                                                 | C   | SNP | GSE1            | ENST00000253458 | 1  | missense                    | c.853             | p.T285P           | tier1 | 146 | 3 | 0.020 | 174  | 26  | 0.129 |
| 783437 | 17 | 76001145  | 76001145  | G                                                 | T   | SNP | TNRC6C          | ENST00000335749 | 1  | 5_prime_untranslated_region | c.-43999          | NULL              | tier3 | 266 | 2 | 0.007 | 626  | 34  | 0.051 |
| 783437 | 21 | 46927371  | 46927412  | GGGAGGGCCAGGTG<br>CTGGGGCGGGAGAG<br>TCGGGTGCTGGCA | -   | DEL | COL18A1         | ENST00000473212 | 1  | 3_prime_untranslated_region | c.*46927371       | NULL              | tier3 | 58  | 1 | 0.017 | 74   | 16  | 0.178 |
| 796518 | 1  | 55611693  | 55611693  | C                                                 | T   | SNP | USP24           | ENST00000407756 | -1 | silent                      | c.1860            | p.E620            | tier1 | 30  | 1 | 0.032 | 95   | 48  | 0.336 |
| 796518 | 2  | 98846643  | 98846643  | G                                                 | A   | SNP | VWA3B           | ENST00000477737 | 1  | missense                    | c.2281            | p.V761I           | tier1 | 77  | 1 | 0.013 | 161  | 36  | 0.181 |
| 796518 | 2  | 171379066 | 171379066 | T                                                 | C   | SNP | MYO3B           | ENST00000334231 | 1  | intronic                    | c.3602+3016       | e30+3016          | tier3 | 50  | 0 | 0.000 | 101  | 48  | 0.322 |
| 796518 | 2  | 179346878 | 179346878 | G                                                 | A   | SNP | PLEKHA3         | ENST00000234453 | 1  | intronic                    | c.40+1242         | e1+1242           | tier3 | 26  | 0 | 0.000 | 98   | 38  | 0.279 |
| 796518 | 2  | 198266834 | 198266834 | T                                                 | C   | SNP | SF3B1           | ENST00000335508 | -1 | missense                    | c.2098            | p.K700E           | tier1 | 239 | 0 | 0.000 | 664  | 39  | 0.056 |
| 796518 | 2  | 198267483 | 198267483 | C                                                 | A   | SNP | SF3B1           | ENST00000335508 | -1 | missense                    | c.1874            | p.R625L           | tier1 | 485 | 1 | 0.002 | 1322 | 59  | 0.043 |
| 796518 | 4  | 151682922 | 151682922 | T                                                 | C   | SNP | LRBA            | ENST00000357115 | -1 | intronic                    | c.5645+13         | e34+13            | tier4 | 126 | 0 | 0.000 | 649  | 54  | 0.077 |
| 796518 | 4  | 155254236 | 155254236 | C                                                 | T   | SNP | DCHS2           | ENST00000357232 | -1 | missense                    | c.1627            | p.G543S           | tier1 | 334 | 0 | 0.000 | 514  | 239 | 0.317 |
| 796518 | 5  | 140202971 | 140202971 | C                                                 | T   | SNP | PCDHA5          | ENST00000529859 | 1  | silent                      | c.1611            | p.R537            | tier1 | 316 | 0 | 0.000 | 556  | 262 | 0.320 |
| 796518 | 6  | 170591580 | 170591580 | G                                                 | A   | SNP | DLL1            | ENST00000366756 | -1 | 3_prime_untranslated_region | c.*382            | NULL              | tier3 | 38  | 0 | 0.000 | 68   | 29  | 0.299 |
| 796518 | 7  | 28319235  | 28319235  | C                                                 | G   | SNP | ENSG00000174495 | ENST00000445031 | -1 | 5_prime_untranslated_region | c.-28319235       | NULL              | tier3 | 42  | 0 | 0.000 | 60   | 32  | 0.344 |
| 796518 | 11 | 55035844  | 55035844  | T                                                 | C   | SNP | TRIM48          | ENST00000417545 | 1  | missense                    | c.574             | p.Y192H           | tier1 | 46  | 2 | 0.042 | 0    | 15  | 1.000 |
| 796518 | 11 | 55035854  | 55035854  | A                                                 | A   | SNP | TRIM48          | ENST00000417545 | 1  | splice_region               | c.578+6           | e4+6              | tier3 | 46  | 2 | 0.042 | 0    | 13  | 1.000 |
| 796518 | 11 | 55035855  | 55035855  | T                                                 | G   | SNP | TRIM48          | ENST00000417545 | 1  | splice_region               | c.578+7           | e4+7              | tier3 | 45  | 2 | 0.042 | 0    | 12  | 1.000 |
| 796518 | 12 | 48179692  | 48179692  | G                                                 | T   | SNP | ENSG00000268069 | ENST00000599515 | 1  | 3_prime_untranslated_region | c.*353            | NULL              | tier3 | 30  | 0 | 0.000 | 61   | 28  | 0.315 |
| 796518 | 13 | 101733940 | 101733940 | G                                                 | A   | SNP | NALCN           | ENST00000251127 | -1 | nonsense                    | c.3823            | p.R1275*          | tier1 | 299 | 1 | 0.003 | 722  | 44  | 0.057 |
| 796518 | 14 | 106788772 | 106788772 | G                                                 | A   | SNP | IGHV2-26        | ENST00000390611 | -1 | 5_prime_flanking_region     | c.-30680          | NULL              | tier3 | 22  | 0 | 0.000 | 47   | 17  | 0.266 |
| 796518 | 14 | 106788774 | 106788774 | T                                                 | C   | SNP | IGHV2-26        | ENST00000390611 | -1 | 5_prime_flanking_region     | c.-30682          | NULL              | tier3 | 21  | 0 | 0.000 | 46   | 16  | 0.258 |
| 796518 | 15 | 32929534  | 32929534  | C                                                 | A   | SNP | ARHGAP11A       | ENST00000361627 | 1  | missense                    | c.2560            | p.Q854K           | tier1 | 92  | 0 | 0.000 | 181  | 78  | 0.301 |
| 796518 | 16 | 56919177  | 56919177  | A                                                 | G   | SNP | SLC12A3         | ENST00000438926 | 1  | missense                    | c.1826            | p.E609G           | tier1 | 370 | 0 | 0.000 | 581  | 264 | 0.312 |
| 796518 | 17 | 986858    | 986858    | G                                                 | A   | SNP | ABR             | ENST00000302538 | -1 | missense                    | c.541             | p.L181F           | tier1 | 39  | 0 | 0.000 | 44   | 22  | 0.328 |
| 796518 | 17 | 51900882  | 51900882  | G                                                 | A   | SNP | KIF2B           | ENST00000268919 | 1  | missense                    | c.488             | p.R163H           | tier1 | 535 | 0 | 0.000 | 794  | 370 | 0.318 |
| 796518 | 18 | 47383269  | 47383269  | A                                                 | G   | SNP | MYO5B           | ENST00000285039 | -1 | splice_region               | c.3945-9          | e30-9             | tier3 | 243 | 0 | 0.000 | 461  | 194 | 0.295 |
| 796518 | 20 | 31877714  | 31877714  | T                                                 | C   | SNP | BPIFB1          | ENST00000253354 | 1  | missense                    | c.281             | p.I94T            | tier1 | 38  | 0 | 0.000 | 89   | 27  | 0.231 |
| 818831 | 1  | 75107026  | 75107026  | G                                                 | A   | SNP | C1orf173        | ENST00000326665 | -1 | missense                    | c.433             | p.P145S           | tier1 | 70  | 0 | 0.000 | 166  | 37  | 0.182 |
| 818831 | 1  | 181706695 | 181706695 | C                                                 | T   | SNP | CACNA1E         | ENST00000367573 | 1  | missense                    | c.3457            | p.R1153C          | tier1 | 411 | 1 | 0.002 | 799  | 24  | 0.029 |
| 818831 | 2  | 92031582  | 92031582  | G                                                 | A   | SNP | ABCD1P5         | ENST00000445663 | 1  | 3_prime_untranslated_region | c.*92031582       | NULL              | tier3 | 80  | 1 | 0.012 | 164  | 38  | 0.186 |
| 818831 | 2  | 101666881 | 101666881 | G                                                 | A   | SNP | TBC1D8          | ENST00000409318 | -1 | missense                    | c.854             | p.P285L           | tier1 | 41  | 0 | 0.000 | 74   | 16  | 0.176 |
| 818831 | 4  | 175220362 | 175220362 | G                                                 | A   | SNP | CEP44           | ENST00000426172 | 1  | splice_site                 | c.89+1            | e1+1              | tier1 | 41  | 0 | 0.000 | 65   | 15  | 0.188 |
| 818831 | 4  | 185612642 | 185612642 | T                                                 | A   | SNP | PRIMPOL         | ENST00000512658 | 1  | 3_prime_untranslated_region | c.*185612642      | NULL              | tier3 | 56  | 1 | 0.018 | 190  | 46  | 0.195 |
| 818831 | 5  | 112926812 | 112926812 | C                                                 | A   | SNP | YTHDC2          | ENST00000161863 | 1  | missense                    | c.3900            | p.N1300K          | tier1 | 72  | 0 | 0.000 | 138  | 19  | 0.120 |
| 818831 | 6  | 168314069 | 168314069 | C                                                 | G   | SNP | MLL7            | ENST00000366806 | 1  | intronic                    | c.2038-779        | e16-779           | tier2 | 55  | 1 | 0.018 | 73   | 28  | 0.277 |
| 818831 | 7  | 74212011  | 74212011  | C                                                 | T   | SNP | GTF2IRD2        | ENST00000405086 | -1 | missense                    | c.1840            | p.V614I           | tier1 | 99  | 1 | 0.010 | 195  | 29  | 0.130 |
| 818831 | 7  | 100350095 | 100350095 | T                                                 | C   | SNP | ZAN             | ENST00000546292 | 1  | silent                      | c.2367            | p.I789            | tier1 | 124 | 2 | 0.016 | 243  | 29  | 0.106 |
| 818831 | 12 | 133050449 | 133050450 | -                                                 | T   | INS | MUC8            | ENST00000595994 | -1 | intronic                    | c.147+130_147+129 | e1+130            | tier2 | 6   | 0 | 0.000 | 1    | 5   | 0.833 |
| 818831 | 14 | 102445717 | 102445717 | C                                                 | A   | SNP | DYNC1H1         | ENST00000360184 | 1  | silent                      | c.406             | p.R136            | tier1 | 72  | 0 | 0.000 | 175  | 23  | 0.116 |
| 818831 | 15 | 74363428  | 74363428  | C                                                 | T   | SNP | GOLGA6A         | ENST00000290438 | -1 | intronic                    | c.1954+37         | e17+37            | tier3 | 310 | 0 | 0.000 | 580  | 28  | 0.046 |
| 818831 | 15 | 89856067  | 89856067  | T                                                 | A   | SNP | FANCI           | ENST00000310775 | 1  | intronic                    | c.3652-68         | e34-68            | tier3 | 52  | 0 | 0.000 | 74   | 12  | 0.140 |
| 818831 | 15 | 90631934  | 90631934  | C                                                 | T   | SNP | IDH2            | ENST00000330062 | -1 | missense                    | c.419             | p.R140Q           | tier1 | 453 | 4 | 0.009 | 780  | 128 | 0.141 |
| 818831 | 17 | 18334137  | 18334137  | G                                                 | G   | SNP | KRT17P2         | ENST00000581146 | 1  | intronic                    | c.NULL            | NULL              | tier3 | 58  | 1 | 0.0   |      |     |       |

|        |    |           |           |       |     |         |                 |                 |                             |                             |              |          |       |     |       |       |      |       |       |
|--------|----|-----------|-----------|-------|-----|---------|-----------------|-----------------|-----------------------------|-----------------------------|--------------|----------|-------|-----|-------|-------|------|-------|-------|
| 819544 | 2  | 236480647 | 236480647 | C     | T   | SNP     | ENSG00000221704 | ENST00000408777 | 1                           | rna                         | NULL         | NULL     | tier1 | 69  | 0     | 0.000 | 186  | 20    | 0.097 |
| 819544 | 5  | 41312207  | 41312207  | A     | T   | SNP     | PLCXD3          | ENST00000328457 | -1                          | 3_prime_untranslated_region | c.*1512      | NULL     | tier3 | 100 | 1     | 0.010 | 261  | 32    | 0.109 |
| 819544 | 5  | 176940748 | 176940748 | C     | A   | SNP     | DDX41           | ENST00000507955 | -1                          | missense                    | c.1036       | p.A346P  | tier1 | 315 | 0     | 0.000 | 593  | 28    | 0.045 |
| 819544 | 6  | 130504496 | 130504496 | G     | A   | SNP     | SAMD3           | ENST00000524930 | -1                          | 3_prime_untranslated_region | c.*31139     | NULL     | tier4 | 33  | 0     | 0.000 | 95   | 26    | 0.213 |
| 819544 | 8  | 110457215 | 110457215 | A     | G   | SNP     | PKHD1L1         | ENST00000378402 | 1                           | missense                    | c.5117       | p.N1706S | tier1 | 500 | 1     | 0.002 | 1136 | 34    | 0.029 |
| 819544 | 12 | 50037698  | 50037698  | G     | T   | SNP     | PRPF40B         | ENST00000548825 | 1                           | nonsense                    | c.2497       | p.E833*  | tier1 | 498 | 0     | 0.000 | 1072 | 29    | 0.026 |
| 819544 | 15 | 90229787  | 90229787  | A     | -   | DEL     | PEX11A          | ENST00000300056 | -1                          | splice_region_del           | c.57-10      | e2-10    | tier3 | 45  | 0     | 0.000 | 69   | 12    | 0.148 |
| 819544 | 17 | 30321557  | 30321557  | T     | -   | DEL     | SUZ12           | ENST00000578106 | 1                           | 3_prime_untranslated_region | c.*30321557  | NULL     | tier3 | 181 | 4     | 0.022 | 496  | 58    | 0.105 |
| 819544 | 17 | 36358189  | 36358189  | G     | T   | SNP     | LOC101929950    | ENST00000312412 | -1                          | intronic                    | c.947-31     | e8-31    | tier4 | 197 | 2     | 0.010 | 604  | 42    | 0.065 |
| 829970 | 1  | 151238730 | 151238730 | G     | T   | SNP     | PSMD4           | ENST00000476855 | 1                           | 3_prime_untranslated_region | c.*151238730 | NULL     | tier3 | 23  | 0     | 0.000 | 145  | 116   | 0.441 |
| 829970 | 2  | 1665807   | 1665807   | T     | C   | SNP     | PXDN            | ENST00000252804 | -1                          | intronic                    | c.1680+37    | e13+37   | tier2 | 20  | 0     | 0.000 | 172  | 124   | 0.418 |
| 829970 | 2  | 21238083  | 21238083  | G     | A   | SNP     | APOB            | ENST00000233242 | -1                          | silent                      | c.3558       | p.T1186  | tier1 | 222 | 0     | 0.000 | 361  | 277   | 0.434 |
| 829970 | 2  | 95944840  | 95944840  | G     | T   | SNP     | PROM2           | ENST00000317620 | 1                           | nonsense                    | c.1222       | p.E408*  | tier1 | 13  | 0     | 0.000 | 114  | 81    | 0.415 |
| 829970 | 2  | 105442572 | 105442572 | C     | G   | SNP     | LOC100506421    | ENST00000413121 | -1                          | intronic                    | c.NULL       | NULL     | tier3 | 66  | 0     | 0.000 | 132  | 126   | 0.487 |
| 829970 | 3  | 38151817  | 38151817  | G     | C   | SNP     | DLEC1           | ENST00000346219 | 1                           | intronic                    | c.3443+45    | e23+45   | tier3 | 38  | 0     | 0.000 | 123  | 92    | 0.426 |
| 829970 | 3  | 56766462  | 56766462  | A     | G   | SNP     | ARHGEF3         | ENST00000338458 | -1                          | splice_region               | c.1138-10    | e11-10   | tier3 | 87  | 0     | 0.000 | 161  | 131   | 0.447 |
| 829970 | 3  | 101477008 | 101477008 | A     | T   | SNP     | CEP97           | ENST00000327230 | 1                           | missense                    | c.1558       | p.N520Y  | tier1 | 60  | 0     | 0.000 | 79   | 83    | 0.512 |
| 829970 | 3  | 180320681 | 180320681 | AAGAG | -   | DEL     | TTC14           | ENST00000296015 | 1                           | frame_shift_del             | c.164_168    | p.K57fs  | tier1 | 109 | 0     | 0.000 | 181  | 91    | 0.335 |
| 829970 | 3  | 182910694 | 182910694 | G     | C   | SNP     | MCF2L2          | ENST00000488149 | -1                          | 5_prime_untranslated_region | c.-182910694 | NULL     | tier3 | 26  | 0     | 0.000 | 91   | 86    | 0.486 |
| 829970 | 4  | 5857824   | 5857824   | A     | T   | SNP     | CRMP1           | ENST00000324989 | -1                          | intronic                    | c.820+46     | e4+46    | tier3 | 42  | 0     | 0.000 | 88   | 86    | 0.494 |
| 829970 | 4  | 15839802  | 15839802  | T     | A   | SNP     | CD38            | ENST00000226279 | 1                           | intronic                    | c.659+14     | e5+14    | tier3 | 107 | 0     | 0.000 | 105  | 82    | 0.439 |
| 829970 | 4  | 70255405  | 70255405  | C     | A   | SNP     | ENSG00000215110 | ENST00000511504 | 1                           | 3_prime_untranslated_region | c.*70255405  | NULL     | tier3 | 173 | 0     | 0.000 | 298  | 219   | 0.423 |
| 829970 | 5  | 7303612   | 7303612   | G     | A   | SNP     | LOC442132       | ENST00000512854 | -1                          | intronic                    | c.NULL       | NULL     | tier3 | 61  | 0     | 0.000 | 259  | 193   | 0.427 |
| 829970 | 5  | 149439406 | 149439406 | C     | T   | SNP     | CSF1R           | ENST00000286301 | -1                          | silent                      | c.1989       | p.T663   | tier1 | 57  | 0     | 0.000 | 26   | 214   | 0.892 |
| 829970 | 6  | 66803321  | 66803321  | C     | T   | SNP     | NUFIP1P         | ENST00000402902 | -1                          | 3_prime_flanking_region     | c.*3         | NULL     | tier3 | 211 | 0     | 0.000 | 346  | 65    | 0.158 |
| 829970 | 6  | 125231919 | 125231919 | T     | G   | SNP     | STL             | ENST00000439075 | -1                          | 5_prime_untranslated_region | c.-125231919 | NULL     | tier3 | 234 | 0     | 0.000 | 498  | 20    | 0.039 |
| 829970 | 7  | 128292569 | 128292569 | C     | T   | SNP     | FAM71F2         | ENST00000480462 | 1                           | 5_prime_flanking_region     | c.-19883     | NULL     | tier3 | 11  | 0     | 0.000 | 3    | 21    | 0.840 |
| 829970 | 7  | 138126219 | 138126219 | C     | T   | SNP     | ENSG00000214815 | ENST00000399037 | 1                           | 3_prime_untranslated_region | c.*138126219 | NULL     | tier2 | 54  | 1     | 0.018 | 211  | 44    | 0.173 |
| 829970 | 8  | 73125567  | 73125567  | A     | -   | DEL     | ENSG00000250979 | ENST00000503430 | -1                          | 5_prime_untranslated_region | c.-73125567  | NULL     | tier2 | 148 | 0     | 0.000 | 381  | 150   | 0.283 |
| 829970 | 8  | 73125568  | 73125568  | C     | T   | SNP     | ENSG00000250979 | ENST00000503430 | -1                          | 5_prime_untranslated_region | c.-73125568  | NULL     | tier2 | 147 | 1     | 0.007 | 361  | 164   | 0.311 |
| 829970 | 9  | 100122246 | 100122246 | A     | -   | DEL     | C9orf174        | ENST00000375202 | 1                           | intronic                    | c.3496-18    | e26-18   | tier3 | 155 | 0     | 0.000 | 417  | 285   | 0.406 |
| 829970 | 10 | 82279156  | 82279156  | G     | SNP | TSPAN14 | ENST00000429989 | 1               | 3_prime_untranslated_region | c.*1424                     | NULL         | tier3    | 72    | 0   | 0.000 | 136   | 137  | 0.502 |       |
| 829970 | 10 | 127477858 | 127477858 | G     | T   | SNP     | UROS            | ENST00000465577 | -1                          | 5_prime_untranslated_region | c.-127477858 | NULL     | tier3 | 30  | 0     | 0.000 | 111  | 116   | 0.511 |
| 829970 | 11 | 49897871  | 49897871  | C     | T   | SNP     | ENSG00000255190 | ENST00000529746 | 1                           | 3_prime_untranslated_region | c.*49897871  | NULL     | tier3 | 323 | 0     | 0.000 | 538  | 414   | 0.434 |
| 829970 | 12 | 5603366   | 5603366   | C     | A   | SNP     | NTF3            | ENST00000423158 | 1                           | missense                    | c.25         | p.Q9K    | tier1 | 36  | 0     | 0.000 | 68   | 57    | 0.456 |
| 829970 | 12 | 18760087  | 18760087  | T     | G   | SNP     | PIK3C2G         | ENST00000538779 | 1                           | intronic                    | c.4088-2382  | e30-2382 | tier2 | 88  | 0     | 0.000 | 191  | 33    | 0.147 |
| 829970 | 12 | 27919782  | 27919782  | C     | A   | SNP     | MANSC4          | ENST00000381273 | -1                          | intronic                    | c.230-50     | e2-50    | tier2 | 58  | 0     | 0.000 | 125  | 99    | 0.440 |
| 829970 | 13 | 99446895  | 99446895  | C     | T   | SNP     | DOCK9           | ENST00000400228 | -1                          | missense                    | c.1993       | p.V665I  | tier1 | 60  | 0     | 0.000 | 104  | 119   | 0.531 |
| 829970 | 14 | 60577741  | 60577741  | A     | G   | SNP     | C14orf135       | ENST00000391611 | 1                           | 3_prime_untranslated_region | c.*2692      | NULL     | tier4 | 45  | 0     | 0.000 | 82   | 81    | 0.494 |
| 829970 | 14 | 90650882  | 90650882  | A     | C   | SNP     | KCNK13          | ENST00000282146 | 1                           | missense                    | c.762        | p.Q254H  | tier1 | 99  | 1     | 0.010 | 755  | 120   | 0.137 |
| 829970 | 15 | 24926165  | 24926165  | A     | T   | SNP     | C15orf2         | ENST00000329468 | 1                           | 3_prime_untranslated_region | c.*1680      | NULL     | tier4 | 49  | 0     | 0.000 | 74   | 48    | 0.393 |
| 829970 | 15 | 58007312  | 58007312  | A     | T   | SNP     | POLR2M          | ENST00000299638 | 1                           | 3_prime_untranslated_region | c.*435       | NULL     | tier3 | 87  | 0     | 0.000 | 190  | 31    | 0.140 |
| 829970 | 16 | 72829450  | 72829450  | A     | G   | SNP     | ZFH3            | ENST00000268489 | -1                          | silent                      | c.7131       | p.P2377  | tier1 | 28  | 0     | 0.000 | 105  | 91    | 0.464 |
| 829970 | 17 | 263645    | 263645    | C     | T   | SNP     | C17orf97        | ENST00000360127 | 1                           | silent                      | c.1011       | p.P337   | tier1 | 129 | 2     | 0.015 | 447  | 82    | 0.154 |
| 829970 | 17 | 7577094   | 7577094   | G     | A   | SNP     | TP53            | ENST00000269305 | -1                          | missense                    | c.844        | p.R282W  | tier1 | 117 | 1     | 0.008 | 116  | 696   | 0.857 |
| 829970 | 17 | 61995243  | 61995243  | C     | T   | SNP     | GH1             | ENST00000323322 | -1                          | silent                      | c.333        | p.S111   | tier1 | 39  | 0     | 0.000 | 213  | 212   | 0.499 |
| 829970 | 19 | 17763404  | 17763404  | A     | T   | SNP     | UNC13A          | ENST00000428389 | -1                          | intronic                    | c.1703+36    | e13+36   | tier3 | 38  | 0     | 0.000 | 83   | 70    | 0.458 |
| 829970 | 19 | 18378165  | 18378165  | T     | G   | SNP     | KIAA1683        | ENST00000392413 | -1                          | missense                    | c.185        | p.K62T   | tier1 | 106 | 0     | 0.000 | 751  | 111   | 0.129 |
| 829970 | 19 | 39214520  | 39214520  | G     | C   | SNP     | ACTN4           | ENST00000252699 | 1                           | intronic                    | c.1552-57    | e14-57   | tier3 | 36  | 0     | 0.000 | 174  | 127   | 0.421 |
| 829970 | 19 | 53793213  | 53793213  | A     | T   | SNP     | BIRC8           | ENST00000426466 | -1                          | missense                    | c.415        | p.S139T  | tier1 | 64  | 0     | 0.000 | 87   | 69    | 0.442 |
| 829970 | 20 | 30785389  | 30785389  | G     | C   | SNP     | PLAGL2          | ENST00000246229 | -1                          | silent                      | c.357        | p.T119   | tier1 | 16  | 0     | 0.000 | 125  | 82    | 0.394 |
| 829970 | 21 | 31655211  | 31655211  | C     | G   | SNP     | KRTAP24-1       | ENST00000340345 | -1                          | missense                    | c.40         | p.V14L   | tier1 | 32  | 0     | 0.000 | 58   | 41    | 0.414 |
| 829970 | 21 | 42694456  | 42694456  | G     | A   | SNP     | FAM3B           | ENST00000357985 | 1                           | intronic                    | c.20-394     | e2-394   | tier4 | 57  | 0     | 0.000 | 121  | 106   | 0.465 |
| 829970 | 21 | 45877697  | 45877697  | G     | A   | SNP     | LRRC3           | ENST00000291592 | 1                           | 3_prime_untranslated_region | c.*396       | NULL     | tier3 | 23  | 0     | 0.000 | 83   | 80    | 0.491 |
| 829970 | 22 | 33255649  | 33255649  | T     | C   | SNP     | TIMP3           | ENST00000266085 | 1                           | 3_prime_untranslated_region | c.*285       | NULL     | tier3 | 196 | 0     | 0.000 | 220  | 112   | 0.337 |
| 839903 | 1  | 82436028  | 82436028  | C     | T   | SNP     | LPHN2           | ENST00000370717 | 1                           | missense                    | c.2752       | p.H918Y  | tier1 | 90  | 0     | 0.000 | 85   | 67    | 0.441 |
| 839903 | 1  | 115258747 | 115258747 | C     | T   | SNP     | NRAS            | ENST00000369535 | -1                          | missense                    | c.35         | p.G12D   | tier1 | 390 | 1     | 0.003 | 588  | 83    | 0.124 |
| 839903 | 1  | 144619315 | 144619315 | G     | T   | SNP     | ENSG00000225241 | ENST00000421407 | 1                           | intronic                    | c.NULL       | NULL     | tier3 | 190 | 1     | 0.005 | 286  | 67    | 0.190 |
| 839903 | 1  | 177927426 | 177927426 | C     | T   | SNP     | SEC16B          | ENST00000527976 | -1                          | missense                    | c.136        | p.A46T   | tier1 | 72  | 0     | 0.000 | 43   | 40    | 0.482 |
| 839903 | 1  | 222705451 | 222705451 | C     | A   | SNP     | HHIPL2          | ENST00000343410 | -1                          | missense                    | c.1580       | p.R527L  | tier1 | 57  | 1     | 0.017 | 35   | 45    | 0.563 |
| 839903 | 1  | 223568401 | 223568401 | G     | A   | SNP     | C1orf65         | ENST00000366875 | 1                           | silent                      | c.1584       | p.K528   | tier1 | 44  | 0     | 0.000 | 43   | 39    | 0.476 |
| 839903 | 2  | 26677567  | 26677567  | G     | T   | SNP     | DRC1            | ENST00000288710 | 1                           | missense                    | c.1972       | p.D658Y  | tier1 | 74  | 0     | 0.000 | 42   | 48    | 0.533 |
| 839903 | 2  | 44203321  | 44203321  | G     | A   | SNP     | LRPPRC          | ENST00000260665 | -1                          | missense                    | c.698        | p.A233V  | tier1 | 44  | 0     | 0.000 | 110  | 23    | 0.172 |
| 839903 | 2  | 97784048  | 97784048  | G     | A   | SNP     | ANKRD36         | ENST00000420699 | 1                           | intronic                    | c.313-33     | e3-33    | tier3 | 205 | 3     | 0.014 | 322  | 25    | 0.072 |
| 839903 | 2  | 97817745  | 97817745  | G     | T   | SNP     | ANKRD36         | ENST00000420699 | 1                           | intronic                    | c.1162+69    | e13+69   | tier4 | 29  | 0     | 0.000 | 56   | 14    | 0.200 |
| 839903 | 2  | 187367384 | 187367384 | G     | A   | SNP     | ZC3H15          | ENST00000337859 | 1                           | intronic                    | c.534+70     | e5+70    | tier3 | 53  | 0     | 0.000 | 100  | 41    | 0.289 |
| 839903 | 3  | 16217151  | 16217151  | G     | T   | SNP     | GALNT15         | ENST00000339732 | 1                           | missense                    | c.493        | p.A165S  | tier1 | 104 | 0     | 0.000 | 69   | 45    | 0.395 |
| 839903 | 3  | 57447266  | 57447266  | G     | A   | SNP     | DNAH12          | ENST00000351747 | -1                          | nonsense                    | c.2617       | p.Q873*  | tier1 | 49  | 0     | 0.000 | 93   | 70    |       |

|        |    |           |           |    |     |                |                        |                 |          |                             |                 |           |       |     |       |       |     |       |       |
|--------|----|-----------|-----------|----|-----|----------------|------------------------|-----------------|----------|-----------------------------|-----------------|-----------|-------|-----|-------|-------|-----|-------|-------|
| 839903 | 5  | 140203552 | 140203552 | G  | T   | SNP            | <i>PCDHA5</i>          | ENST00000529859 | 1        | missense                    | c.2192          | p.C731F   | tier1 | 267 | 2     | 0.007 | 237 | 208   | 0.466 |
| 839903 | 6  | 30229312  | 30229312  | G  | T   | SNP            | <i>HCG17</i>           | ENST00000453558 | -1       | intronic                    | c.NULL          | NULL      | tier3 | 127 | 0     | 0.000 | 82  | 67    | 0.450 |
| 839903 | 7  | 151082221 | 151082221 | G  | A   | SNP            | <i>WDR86</i>           | ENST00000334493 | -1       | missense                    | c.815           | p.T272M   | tier1 | 66  | 0     | 0.000 | 84  | 16    | 0.160 |
| 839903 | 8  | 1649371   | 1649371   | G  | A   | SNP            | <i>DLGAP2</i>          | ENST00000520901 | 1        | missense                    | c.2735          | p.R912H   | tier1 | 182 | 0     | 0.000 | 118 | 108   | 0.478 |
| 839903 | 8  | 65496059  | 65496059  | C  | T   | SNP            | <i>BHLHE22</i>         | ENST00000321870 | 1        | 3_prime_untranslated_region | c.*1566         | NULL      | tier2 | 106 | 0     | 0.000 | 156 | 35    | 0.182 |
| 839903 | 9  | 32624147  | 32624147  | T  | A   | SNP            | <i>ENSG00000223440</i> | ENST00000430787 | 1        | 5_prime_flanking_region     | c.-9305         | NULL      | tier4 | 55  | 0     | 0.000 | 66  | 90    | 0.577 |
| 839903 | 10 | 5494360   | 5494360   | G  | A   | SNP            | <i>NET1</i>            | ENST00000355029 | 1        | missense                    | c.403           | p.A135T   | tier1 | 100 | 2     | 0.020 | 73  | 54    | 0.425 |
| 839903 | 10 | 49220302  | 49220302  | G  | A   | SNP            | <i>CTGLF12P</i>        | ENST00000339771 | -1       | 5_prime_untranslated_region | c.-49220302     | NULL      | tier3 | 56  | 0     | 0.000 | 99  | 53    | 0.349 |
| 839903 | 10 | 90582658  | 90582658  | G  | A   | SNP            | <i>ANKRD22</i>         | ENST00000476963 | -1       | rna                         | NULL            | NULL      | tier1 | 96  | 0     | 0.000 | 96  | 79    | 0.451 |
| 839903 | 10 | 112356174 | 112356174 | G  | C   | SNP            | <i>SMC3</i>            | ENST00000361804 | 1        | missense                    | c.1982          | p.R661P   | tier1 | 392 | 1     | 0.003 | 687 | 160   | 0.189 |
| 839903 | 10 | 117486773 | 117486773 | C  | T   | SNP            | <i>ATRNL1</i>          | ENST00000355044 | 1        | nonsense                    | c.3811          | p.R1271*  | tier1 | 165 | 0     | 0.000 | 177 | 12    | 0.064 |
| 839903 | 10 | 131634749 | 131634749 | C  | T   | SNP            | <i>EBF3</i>            | ENST00000368648 | -1       | 3_prime_untranslated_region | c.*1444         | NULL      | tier3 | 345 | 0     | 0.000 | 314 | 86    | 0.215 |
| 839903 | 11 | 1083328   | 1083328   | C  | A   | SNP            | <i>MUC2</i>            | ENST00000441003 | 1        | splice_region               | c.2219+9        | e16+9     | tier2 | 60  | 0     | 0.000 | 77  | 38    | 0.330 |
| 839903 | 11 | 46334349  | 46334349  | C  | T   | SNP            | <i>CREB3L1</i>         | ENST00000288400 | 1        | intronic                    | c.963-53        | e8-53     | tier3 | 52  | 0     | 0.000 | 49  | 37    | 0.430 |
| 839903 | 11 | 55322753  | 55322753  | C  | T   | SNP            | <i>OR4C15</i>          | ENST00000314644 | 1        | missense                    | c.971           | p.A324V   | tier1 | 57  | 0     | 0.000 | 134 | 38    | 0.221 |
| 839903 | 11 | 63997883  | 63997883  | T  | -   | DEL            | <i>DNAJC4</i>          | ENST00000321685 | 1        | intronic                    | c.1-21          | e1-21     | tier2 | 17  | 0     | 0.000 | 21  | 11    | 0.344 |
| 839903 | 11 | 107219570 | 107219570 | T  | G   | SNP            | <i>CWF19L2</i>         | ENST00000462890 | -1       | 5_prime_untranslated_region | c.-107219570    | NULL      | tier3 | 79  | 0     | 0.000 | 85  | 71    | 0.455 |
| 839903 | 12 | 43945607  | 43945607  | G  | T   | SNP            | <i>ADAMTS20</i>        | ENST00000389420 | -1       | intronic                    | c.91+27         | e1+27     | tier2 | 134 | 0     | 0.000 | 86  | 63    | 0.417 |
| 839903 | 12 | 48360948  | 48360948  | A  | -   | DEL            | <i>TMEM106C</i>        | ENST00000429772 | 1        | intronic                    | c.603-43        | e6-43     | tier3 | 57  | 0     | 0.000 | 56  | 9     | 0.139 |
| 839903 | 12 | 49725038  | 49725038  | C  | T   | SNP            | <i>TROAP</i>           | ENST00000257909 | 1        | missense                    | c.2140          | p.R714C   | tier1 | 74  | 0     | 0.000 | 73  | 67    | 0.479 |
| 839903 | 13 | 36401953  | 36401953  | T  | G   | SNP            | <i>DCLK1</i>           | ENST00000360631 | -1       | intronic                    | c.1288-62       | e9-62     | tier3 | 208 | 0     | 0.000 | 201 | 164   | 0.448 |
| 839903 | 14 | 76211445  | 76211445  | G  | A   | SNP            | <i>TTL5</i>            | ENST00000298832 | 1        | missense                    | c.1289          | p.R430H   | tier1 | 124 | 1     | 0.008 | 190 | 20    | 0.095 |
| 839903 | 14 | 106135124 | 106135124 | C  | T   | SNP            | <i>IGHGP</i>           | ENST00000390555 | -1       | 5_prime_untranslated_region | c.-106135124    | NULL      | tier3 | 170 | 0     | 0.000 | 272 | 32    | 0.105 |
| 839903 | 15 | 57999148  | 57999148  | C  | T   | SNP            | <i>POLR2M</i>          | ENST00000299638 | 1        | silent                      | c.108           | p.R36     | tier1 | 113 | 0     | 0.000 | 134 | 21    | 0.136 |
| 839903 | 16 | 29851667  | 29851667  | C  | T   | SNP            | <i>MVP</i>             | ENST00000357402 | 1        | missense                    | c.1078          | p.R360C   | tier1 | 31  | 1     | 0.031 | 48  | 41    | 0.461 |
| 839903 | 16 | 30722141  | 30722141  | G  | T   | SNP            | <i>SRCAP</i>           | ENST00000262518 | 1        | nonsense                    | c.1201          | p.E401*   | tier1 | 56  | 0     | 0.000 | 39  | 36    | 0.480 |
| 839903 | 16 | 87160454  | 87160454  | A  | G   | SNP            | <i>C16orf95</i>        | ENST00000562840 | -1       | intronic                    | c.NULL          | NULL      | tier3 | 77  | 0     | 0.000 | 104 | 21    | 0.168 |
| 839903 | 17 | 7010496   | 7010496   | G  | T   | SNP            | <i>ASGR2</i>           | ENST00000355035 | -1       | intronic                    | c.512-26        | e6-26     | tier3 | 58  | 1     | 0.017 | 60  | 71    | 0.542 |
| 839903 | 17 | 39041424  | 39041424  | C  | T   | SNP            | <i>KRT20</i>           | ENST00000167588 | -1       | missense                    | c.14            | p.R5H     | tier1 | 82  | 2     | 0.024 | 68  | 69    | 0.504 |
| 839903 | 18 | 21452994  | 21452994  | C  | T   | SNP            | <i>LAMA3</i>           | ENST00000269217 | 1        | 5_prime_untranslated_region | c.-15           | NULL      | tier3 | 50  | 0     | 0.000 | 48  | 41    | 0.461 |
| 839903 | 19 | 13136234  | 13136234  | G  | T   | SNP            | <i>NFIX</i>            | ENST00000585575 | 1        | nonsense                    | c.403           | p.E135*   | tier1 | 114 | 0     | 0.000 | 143 | 44    | 0.233 |
| 839903 | 19 | 42219296  | 42219296  | G  | A   | SNP            | <i>CEACAM5</i>         | ENST00000596606 | 1        | 3_prime_untranslated_region | c.*42219296     | NULL      | tier3 | 42  | 0     | 0.000 | 24  | 26    | 0.520 |
| 839903 | 20 | 16349047  | 16349047  | C  | G   | SNP            | <i>KIF16B</i>          | ENST00000408042 | -1       | intronic                    | c.3499-576      | e23-576   | tier3 | 139 | 0     | 0.000 | 77  | 70    | 0.470 |
| 839903 | X  | 48926088  | 48926088  | C  | T   | SNP            | <i>CCDC120</i>         | ENST00000603986 | 1        | missense                    | c.1985          | p.A662V   | tier1 | 96  | 2     | 0.020 | 67  | 53    | 0.442 |
| 839903 | X  | 77222318  | 77222318  | C  | T   | SNP            | <i>ATP7A</i>           | ENST00000341514 | 1        | intronic                    | c.1-4800        | e1-4800   | tier4 | 38  | 0     | 0.000 | 49  | 32    | 0.395 |
| 839903 | X  | 153631127 | 153631127 | G  | A   | SNP            | <i>DNASE1L1</i>        | ENST0000014935  | -1       | missense                    | c.830           | p.A277V   | tier1 | 158 | 0     | 0.000 | 316 | 17    | 0.051 |
| 848524 | 1  | 99164247  | 99164247  | T  | -   | DEL            | <i>SNX7</i>            | ENST00000306121 | 1        | intronic                    | c.839-15        | e6-15     | tier3 | 46  | 0     | 0.000 | 93  | 15    | 0.139 |
| 848524 | 1  | 150432709 | 150432709 | C  | T   | SNP            | <i>RPRD2</i>           | ENST00000369068 | 1        | silent                      | c.1327          | p.L443    | tier1 | 59  | 0     | 0.000 | 82  | 12    | 0.128 |
| 848524 | 1  | 155580877 | 155580877 | T  | T   | SNP            | <i>MSTO1</i>           | ENST00000245564 | 1        | nonsense                    | c.268           | p.Q90*    | tier1 | 18  | 0     | 0.000 | 20  | 16    | 0.444 |
| 848524 | 1  | 168161365 | 168161365 | C  | T   | SNP            | <i>TIPRL</i>           | ENST00000367833 | 1        | intronic                    | c.516+627       | e4+627    | tier3 | 55  | 3     | 0.052 | 70  | 53    | 0.427 |
| 848524 | 1  | 177898245 | 177898245 | A  | -   | DEL            | <i>ENSG00000254154</i> | ENST00000354921 | -1       | rna                         | NULL            | NULL      | tier1 | 81  | 2     | 0.024 | 76  | 43    | 0.361 |
| 848524 | 1  | 243419492 | 243419492 | A  | SNP | <i>SDCCAG8</i> | ENST00000366541        | 1               | missense | c.17                        | p.E6G           | tier1     | 98    | 0   | 0.000 | 106   | 87  | 0.451 |       |
| 848524 | 2  | 237103618 | 237103618 | C  | T   | SNP            | <i>ASB18</i>           | ENST00000409749 | -1       | missense                    | c.1298          | p.R433H   | tier1 | 55  | 2     | 0.035 | 46  | 50    | 0.521 |
| 848524 | 3  | 50138116  | 50138116  | G  | A   | SNP            | <i>RBM5</i>            | ENST00000469838 | 1        | 3_prime_untranslated_region | c.*609          | NULL      | tier3 | 52  | 0     | 0.000 | 62  | 47    | 0.431 |
| 848524 | 3  | 57611690  | 57611690  | A  | G   | SNP            | <i>DENND6A</i>         | ENST00000311128 | -1       | 3_prime_untranslated_region | c.*2251         | NULL      | tier2 | 116 | 2     | 0.017 | 236 | 196   | 0.454 |
| 848524 | 4  | 1803182   | 1803182   | C  | A   | SNP            | <i>FGFR3</i>           | ENST00000340107 | 1        | silent                      | c.534           | p.A178    | tier1 | 19  | 0     | 0.000 | 19  | 24    | 0.558 |
| 848524 | 4  | 8234226   | 8234226   | G  | A   | SNP            | <i>SH3TC1</i>          | ENST00000502350 | 1        | 3_prime_untranslated_region | c.*8234226      | NULL      | tier2 | 57  | 2     | 0.034 | 58  | 46    | 0.442 |
| 848524 | 4  | 54324769  | 54324769  | T  | C   | SNP            | <i>FIP1L1</i>          | ENST00000507206 | 1        | 3_prime_untranslated_region | c.*54324769     | NULL      | tier3 | 35  | 1     | 0.028 | 57  | 46    | 0.447 |
| 848524 | 4  | 67142574  | 67142574  | T  | A   | SNP            | <i>MIR1269A</i>        | ENST00000408636 | 1        | rna                         | NULL            | NULL      | tier1 | 65  | 0     | 0.000 | 61  | 39    | 0.390 |
| 848524 | 4  | 165187407 | 165187407 | T  | C   | SNP            | <i>01.Mär</i>          | ENST00000503008 | -1       | intronic                    | c.1+116932      | e0+116932 | tier4 | 232 | 3     | 0.013 | 318 | 108   | 0.254 |
| 848524 | 5  | 80064748  | 80064748  | C  | G   | SNP            | <i>MSH3</i>            | ENST00000265081 | 1        | missense                    | c.2179          | p.R727G   | tier1 | 161 | 0     | 0.000 | 280 | 29    | 0.094 |
| 848524 | 5  | 87502321  | 87502321  | G  | -   | DEL            | <i>TMEM161B</i>        | ENST00000296595 | -1       | splice_region_del           | c.599-5         | e7-5      | tier3 | 168 | 2     | 0.012 | 315 | 25    | 0.074 |
| 848524 | 5  | 140221091 | 140221091 | G  | T   | SNP            | <i>PCDHA8</i>          | ENST00000531613 | 1        | missense                    | c.185           | p.R62L    | tier1 | 548 | 12    | 0.021 | 577 | 361   | 0.384 |
| 848524 | 5  | 176016454 | 176016454 | C  | A   | SNP            | <i>CDHR2</i>           | ENST00000508085 | 1        | 3_prime_untranslated_region | c.*176016454    | NULL      | tier3 | 47  | 1     | 0.021 | 42  | 43    | 0.506 |
| 848524 | 6  | 88757740  | 88757740  | C  | T   | SNP            | <i>SPACA1</i>          | ENST00000237201 | 1        | silent                      | c.117           | p.A39     | tier1 | 51  | 2     | 0.038 | 45  | 37    | 0.451 |
| 848524 | 7  | 27210530  | 27210530  | G  | A   | SNP            | <i>HOXA10</i>          | ENST00000283921 | -1       | 3_prime_untranslated_region | c.*988          | NULL      | tier2 | 244 | 1     | 0.004 | 269 | 15    | 0.053 |
| 848524 | 7  | 53103572  | 53103572  | C  | T   | SNP            | <i>POM121L12</i>       | ENST00000408890 | 1        | missense                    | c.208           | p.R70C    | tier1 | 11  | 0     | 0.000 | 9   | 15    | 0.625 |
| 848524 | 7  | 142353940 | 142353941 | TG | -   | DEL            | <i>TRBV23-1</i>        | ENST00000390396 | 1        | frame_shift_del             | c.323_324       | p.Y109fs  | tier1 | 62  | 1     | 0.016 | 36  | 46    | 0.561 |
| 848524 | 8  | 11189142  | 11189142  | G  | A   | SNP            | <i>SLC35G5</i>         | ENST00000382435 | 1        | missense                    | c.527           | p.G176E   | tier1 | 110 | 1     | 0.009 | 128 | 14    | 0.099 |
| 848524 | 8  | 51449330  | 51449330  | G  | A   | SNP            | <i>SNTG1</i>           | ENST00000518864 | 1        | silent                      | c.642           | p.S214    | tier1 | 50  | 0     | 0.000 | 34  | 40    | 0.541 |
| 848524 | 8  | 92982935  | 92982935  | G  | A   | SNP            | <i>RUNX1T1</i>         | ENST00000436581 | -1       | missense                    | c.1523          | p.A508V   | tier1 | 437 | 13    | 0.029 | 449 | 398   | 0.469 |
| 848524 | 8  | 144800290 | 144800290 | C  | G   | SNP            | <i>MAPK15</i>          | ENST00000475376 | 1        | 3_prime_untranslated_region | c.*144800290    | NULL      | tier3 | 79  | 2     | 0.025 | 58  | 48    | 0.453 |
| 848524 | 9  | 98242628  | 98242628  | T  | C   | SNP            | <i>PTCH1</i>           | ENST00000331920 | -1       | intronic                    | c.945+44        | e6+44     | tier3 | 409 | 6     | 0.014 | 628 | 102   | 0.140 |
| 848524 | 10 | 75560546  | 75560546  | C  | -   | DEL            | <i>ZSWIM8</i>          | ENST00000603195 | 1        | rna                         | NULL            | NULL      | tier1 | 124 | 2     | 0.016 | 182 | 20    | 0.099 |
| 848524 | 11 | 69631012  | 69631012  | C  | A   | SNP            | <i>FGF3</i>            | ENST00000334134 | -1       | intronic                    | c.324+76        | e2+76     | tier3 | 29  | 1     | 0.033 | 25  | 28    | 0.528 |
| 848524 | 11 | 78601098  | 78601098  | G  | A   | SNP            | <i>TENM4</i>           | ENST00000278550 | -1       | intronic                    | c.849-33        | e5-33     | tier3 | 49  | 0     | 0.000 | 17  | 27    | 0.614 |
| 848524 | 11 | 102395831 | 102395832 | -  | T   | INS            | <i>MMP7</i>            | ENST00000260227 | -1       | intronic                    | c.485-37_485-36 | e4-36     | tier3 | 79  | 0     | 0.000 | 101 | 12    | 0.106 |
| 848524 | 12 | 34        |           |    |     |                |                        |                 |          |                             |                 |           |       |     |       |       |     |       |       |



|        |    |           |           |                             |   |     |                 |                 |    |                             |                     |                        |       |      |    |       |      |     |       |
|--------|----|-----------|-----------|-----------------------------|---|-----|-----------------|-----------------|----|-----------------------------|---------------------|------------------------|-------|------|----|-------|------|-----|-------|
| 848524 | 18 | 66344112  | 66344115  | AATA                        | - | DEL | TMX3            | ENST00000578816 | -1 | 5_prime_untranslated_region | c.-66344112         | NULL                   | tier3 | 66   | 3  | 0.044 | 70   | 40  | 0.364 |
| 848524 | 19 | 1043430   | 1043430   | C                           | G | SNP | ABCA7           | ENST00000263094 | 1  | silent                      | c.888               | p.L296                 | tier1 | 58   | 2  | 0.033 | 66   | 55  | 0.455 |
| 848524 | 19 | 37064363  | 37064363  | A                           | T | SNP | LOC101927599    | ENST00000448373 | 1  | rna                         | NULL                | NULL                   | tier1 | 111  | 0  | 0.000 | 145  | 122 | 0.457 |
| 848524 | 19 | 56173950  | 56173964  | AGATTAAACCAGGACA            | - | DEL | U2AF2           | ENST00000308924 | 1  | in_frame_del                | c.569_583           | p.INQDK191in_frame_del | tier1 | 514  | 3  | 0.006 | 497  | 89  | 0.152 |
| 848524 | 20 | 31022403  | 31022425  | CACCACTGCCATAGA<br>GAGGCGGC | - | DEL | ASXL1           | ENST00000375687 | 1  | frame_shift_del             | c.1888_1910         | p.H633fs               | tier1 | 652  | 5  | 0.008 | 914  | 129 | 0.124 |
| 848524 | 20 | 31022417  | 31022417  | A                           | - | DEL | ASXL1           | ENST00000375687 | 1  | frame_shift_del             | c.1902              | p.E635fs               | tier1 | 640  | 3  | 0.005 | 740  | 91  | 0.110 |
| 848524 | 21 | 14424204  | 14424204  | C                           | T | SNP | ANKRD30BP2      | ENST00000471407 | 1  | rna                         | NULL                | NULL                   | tier1 | 407  | 6  | 0.015 | 562  | 151 | 0.211 |
| 855934 | 1  | 228403429 | 228403429 | G                           | A | SNP | OBSCN           | ENST00000422127 | 1  | missense                    | c.1994              | p.R665Q                | tier1 | 100  | 7  | 0.065 | 144  | 111 | 0.432 |
| 855934 | 2  | 81421390  | 81421390  | G                           | A | SNP | ENSG00000234429 | ENST00000378334 | -1 | 3_prime_flanking_region     | c.*71               | NULL                   | tier2 | 99   | 0  | 0.000 | 102  | 87  | 0.456 |
| 855934 | 2  | 166611398 | 166611398 | G                           | T | SNP | GALNT3          | ENST00000392701 | -1 | intronic                    | c.1524+44           | e7+44                  | tier3 | 117  | 0  | 0.000 | 94   | 73  | 0.437 |
| 855934 | 2  | 172231602 | 172231602 | C                           | T | SNP | ENSG00000224553 | ENST00000428525 | -1 | 5_prime_untranslated_region | c.-172231602        | NULL                   | tier3 | 68   | 0  | 0.000 | 105  | 103 | 0.495 |
| 855934 | 3  | 133087476 | 133087477 | CA                          | - | DEL | TMEM108         | ENST00000321871 | 1  | intronic                    | c.41-11120_41-11119 | e2-11119               | tier3 | 55   | 0  | 0.000 | 74   | 11  | 0.129 |
| 855934 | 4  | 106157845 | 106157845 | C                           | T | SNP | TET2            | ENST00000380013 | 1  | nonsense                    | c.2746              | p.Q916*                | tier1 | 50   | 3  | 0.057 | 49   | 40  | 0.449 |
| 855934 | 5  | 140783754 | 140783754 | G                           | A | SNP | PCDHGA9         | ENST00000573521 | 1  | missense                    | c.1235              | p.R412Q                | tier1 | 44   | 0  | 0.000 | 56   | 60  | 0.517 |
| 855934 | 6  | 30530949  | 30530949  | C                           | T | SNP | PRR3            | ENST00000481741 | 1  | rna                         | NULL                | NULL                   | tier1 | 95   | 0  | 0.000 | 102  | 87  | 0.460 |
| 855934 | 6  | 31637272  | 31637272  | C                           | T | SNP | CSNK2B          | ENST00000375865 | 1  | nonsense                    | c.544               | p.Q182*                | tier1 | 18   | 0  | 0.000 | 20   | 23  | 0.535 |
| 855934 | 6  | 118800974 | 118800974 | T                           | C | SNP | CEP85L          | ENST00000368488 | -1 | intronic                    | c.1923+60           | e10+60                 | tier3 | 68   | 0  | 0.000 | 35   | 28  | 0.444 |
| 855934 | 7  | 6439714   | 6439714   | T                           | C | SNP | RAC1            | ENST00000473564 | 1  | 3_prime_untranslated_region | c.*6439714          | NULL                   | tier3 | 195  | 0  | 0.000 | 164  | 134 | 0.450 |
| 855934 | 7  | 101758501 | 101758501 | C                           | T | SNP | CUX1            | ENST00000360264 | 1  | nonsense                    | c.655               | p.R219*                | tier1 | 74   | 0  | 0.000 | 46   | 66  | 0.589 |
| 855934 | 8  | 139668092 | 139668092 | C                           | T | SNP | COL22A1         | ENST00000303045 | -1 | intronic                    | c.3333+48           | e44+48                 | tier3 | 98   | 0  | 0.000 | 63   | 41  | 0.394 |
| 855934 | 8  | 140767744 | 140767744 | T                           | G | SNP | TRAPPC9         | ENST00000389328 | -1 | intronic                    | c.3350-23299        | e22-23299              | tier3 | 74   | 0  | 0.000 | 209  | 21  | 0.091 |
| 855934 | 8  | 145773426 | 145773426 | C                           | T | SNP | ARHGAP39        | ENST00000377307 | -1 | silent                      | c.1044              | p.S348                 | tier1 | 12   | 0  | 0.000 | 18   | 15  | 0.455 |
| 855934 | 10 | 3183033   | 3183033   | A                           | G | SNP | PITRM1          | ENST00000380989 | -1 | intronic                    | c.2649-29           | e24-29                 | tier3 | 80   | 0  | 0.000 | 78   | 55  | 0.410 |
| 855934 | 10 | 43651051  | 43651051  | A                           | G | SNP | CSGALNACT2      | ENST00000374466 | 1  | missense                    | c.454               | p.T152A                | tier1 | 73   | 0  | 0.000 | 55   | 48  | 0.466 |
| 855934 | 10 | 71695049  | 71695049  | G                           | A | SNP | COL13A1         | ENST00000356340 | 1  | intronic                    | c.1696-57           | e30-57                 | tier3 | 66   | 0  | 0.000 | 62   | 79  | 0.560 |
| 855934 | 10 | 104120904 | 104120904 | G                           | A | SNP | GBF1            | ENST00000476019 | 1  | rna                         | NULL                | NULL                   | tier1 | 38   | 0  | 0.000 | 30   | 24  | 0.444 |
| 855934 | 10 | 115528652 | 115528652 | G                           | A | SNP | PLEKHS1         | ENST00000369310 | 1  | splice_region               | c.417+3             | e5+3                   | tier2 | 48   | 0  | 0.000 | 28   | 26  | 0.482 |
| 855934 | 10 | 135292946 | 135292946 | A                           | C | SNP | SPRN            | ENST00000541506 | -1 | intronic                    | c.1-55745           | e1-55745               | tier3 | 38   | 0  | 0.000 | 46   | 11  | 0.193 |
| 855934 | 12 | 54796846  | 54796846  | G                           | A | SNP | ITGA5           | ENST00000551564 | -1 | 5_prime_untranslated_region | c.-54796846         | NULL                   | tier3 | 70   | 1  | 0.014 | 103  | 74  | 0.418 |
| 855934 | 12 | 70064230  | 70064230  | T                           | G | SNP | BEST3           | ENST00000476098 | -1 | missense                    | c.590               | p.D197A                | tier1 | 47   | 0  | 0.000 | 54   | 50  | 0.481 |
| 855934 | 16 | 84888372  | 84888372  | C                           | T | SNP | CRISPLD2        | ENST00000262424 | 1  | missense                    | c.646               | p.R216W                | tier1 | 77   | 0  | 0.000 | 115  | 113 | 0.496 |
| 855934 | 18 | 30253100  | 30253100  | C                           | T | SNP | KLHL14          | ENST00000359358 | -1 | 3_prime_untranslated_region | c.*1520             | NULL                   | tier2 | 121  | 1  | 0.008 | 74   | 44  | 0.373 |
| 855934 | 18 | 44555207  | 44555207  | G                           | A | SNP | TCEB3C          | ENST00000330682 | -1 | missense                    | c.1007              | p.T336M                | tier1 | 574  | 0  | 0.000 | 1089 | 41  | 0.036 |
| 855934 | 19 | 43679576  | 43679576  | C                           | T | SNP | PSG5            | ENST00000342951 | -1 | missense                    | c.755               | p.R252H                | tier1 | 206  | 1  | 0.005 | 194  | 192 | 0.497 |
| 855934 | 19 | 57772501  | 57772501  | C                           | G | SNP | ZNF460          | ENST00000360338 | 1  | 5_prime_flanking_region     | c.-19674            | NULL                   | tier3 | 77   | 1  | 0.013 | 57   | 46  | 0.442 |
| 855934 | 20 | 31022442  | 31022443  | GG                          | - | DEL | ASXL1           | ENST00000375687 | 1  | frame_shift_del             | c.1927_1928         | p.G645fs               | tier1 | 732  | 15 | 0.020 | 990  | 621 | 0.386 |
| 855934 | 20 | 49199177  | 49199177  | A                           | C | SNP | PTPN1           | ENST00000371621 | 1  | intronic                    | c.1285-52           | e10-52                 | tier3 | 99   | 3  | 0.029 | 96   | 78  | 0.448 |
| 855934 | 21 | 44514777  | 44514777  | T                           | G | SNP | U2AF1           | ENST00000291552 | -1 | missense                    | c.470               | p.Q157P                | tier1 | 374  | 7  | 0.018 | 449  | 328 | 0.421 |
| 855934 | X  | 73071895  | 73071895  | C                           | A | SNP | XIST            | ENST00000429829 | -1 | rna                         | NULL                | NULL                   | tier1 | 74   | 4  | 0.051 | 105  | 41  | 0.281 |
| 855934 | X  | 76888698  | 76888698  | G                           | A | SNP | ATRX            | ENST00000373344 | -1 | missense                    | c.5131              | p.P1711S               | tier1 | 25   | 0  | 0.000 | 2    | 25  | 0.926 |
| 855934 | X  | 133511773 | 133511774 | -                           | A | INS | PHF6            | ENST00000394292 | 1  | frame_shift_ins             | c.126_127           | p.H42fs                | tier1 | 144  | 0  | 0.000 | 32   | 165 | 0.838 |
| 856550 | 1  | 26317279  | 26317279  | G                           | A | SNP | PAFAH2          | ENST00000374282 | -1 | missense                    | c.29                | p.P10L                 | tier1 | 65   | 3  | 0.044 | 61   | 41  | 0.402 |
| 856550 | 1  | 32127089  | 32127089  | C                           | T | SNP | COL16A1         | ENST00000271069 | -1 | intronic                    | c.3727-30           | e60-30                 | tier3 | 80   | 1  | 0.012 | 55   | 46  | 0.455 |
| 856550 | 1  | 115258747 | 115258747 | C                           | T | SNP | NRAS            | ENST00000369535 | -1 | missense                    | c.35                | p.G12D                 | tier1 | 470  | 3  | 0.006 | 461  | 250 | 0.351 |
| 856550 | 1  | 142699411 | 142699412 | -                           | T | INS | ENSG00000203849 | ENST00000369381 | -1 | rna                         | NULL                | NULL                   | tier1 | 170  | 1  | 0.006 | 212  | 77  | 0.266 |
| 856550 | 1  | 204960404 | 204960404 | G                           | A | SNP | NFASC           | ENST00000367172 | 1  | intronic                    | c.3092+2466         | e23+2466               | tier2 | 83   | 0  | 0.000 | 73   | 51  | 0.411 |
| 856550 | 1  | 206941873 | 206941873 | A                           | G | SNP | IL10            | ENST00000423557 | -1 | 3_prime_untranslated_region | c.*108              | NULL                   | tier3 | 156  | 0  | 0.000 | 152  | 149 | 0.493 |
| 856550 | 2  | 202514343 | 202514343 | C                           | T | SNP | MPP4            | ENST00000359962 | -1 | missense                    | c.1540              | p.V514I                | tier1 | 85   | 2  | 0.023 | 75   | 40  | 0.348 |
| 856550 | 2  | 216967347 | 216967347 | T                           | - | DEL | TMEM169         | ENST00000295658 | 1  | 3_prime_untranslated_region | c.*2082             | NULL                   | tier4 | 121  | 3  | 0.024 | 169  | 25  | 0.129 |
| 856550 | 3  | 57232440  | 57232440  | A                           | T | SNP | HESX1           | ENST00000295934 | -1 | missense                    | c.438               | p.N146K                | tier1 | 130  | 1  | 0.008 | 148  | 131 | 0.470 |
| 856550 | 3  | 141892042 | 141892042 | A                           | - | DEL | GK5             | ENST00000463349 | -1 | splice_region_del           | c.29-3              | e2-3                   | tier4 | 60   | 1  | 0.016 | 119  | 22  | 0.156 |
| 856550 | 3  | 178546013 | 178546013 | C                           | T | SNP | KCNMB2          | ENST00000358316 | 1  | missense                    | c.275               | p.T92M                 | tier1 | 98   | 3  | 0.030 | 72   | 89  | 0.553 |
| 856550 | 5  | 24487247  | 24487247  | C                           | A | SNP | CDH10           | ENST00000264463 | -1 | 3_prime_untranslated_region | c.*525              | NULL                   | tier4 | 262  | 4  | 0.015 | 282  | 219 | 0.435 |
| 856550 | 5  | 112403792 | 112403792 | C                           | A | SNP | MCC             | ENST00000302475 | -1 | missense                    | c.1444              | p.V482L                | tier1 | 47   | 0  | 0.000 | 36   | 39  | 0.520 |
| 856550 | 5  | 153190809 | 153190809 | G                           | A | SNP | GRIA1           | ENST00000448073 | 1  | 3_prime_untranslated_region | c.*24               | NULL                   | tier3 | 49   | 2  | 0.039 | 34   | 26  | 0.433 |
| 856550 | 6  | 66044805  | 66044805  | C                           | T | SNP | EYS             | ENST00000342421 | -1 | 3_prime_untranslated_region | c.*49               | NULL                   | tier2 | 68   | 1  | 0.015 | 90   | 65  | 0.419 |
| 856550 | 6  | 131179391 | 131179391 | G                           | C | SNP | EPB41L2         | ENST00000526782 | -1 | 5_prime_untranslated_region | c.-131179391        | NULL                   | tier3 | 53   | 0  | 0.000 | 49   | 32  | 0.386 |
| 856550 | 7  | 131853016 | 131853016 | A                           | G | SNP | PLXNA4          | ENST00000321063 | -1 | intronic                    | c.4286+47           | e21+47                 | tier3 | 53   | 0  | 0.000 | 32   | 28  | 0.467 |
| 856550 | 7  | 148507436 | 148507436 | T                           | C | SNP | EZH2            | ENST00000320356 | -1 | missense                    | c.2018              | p.N673S                | tier1 | 368  | 3  | 0.008 | 286  | 197 | 0.407 |
| 856550 | 9  | 99233221  | 99233221  | T                           | C | SNP | HABP4           | ENST00000375249 | 1  | intronic                    | c.744-72            | e5-72                  | tier3 | 78   | 1  | 0.013 | 44   | 31  | 0.408 |
| 856550 | 9  | 99233241  | 99233241  | G                           | C | SNP | HABP4           | ENST00000375249 | 1  | intronic                    | c.744-52            | e5-52                  | tier3 | 105  | 1  | 0.009 | 61   | 50  | 0.446 |
| 856550 | 10 | 89118109  | 89118109  | T                           | C | SNP | NUTM2D          | ENST00000381697 | 1  | silent                      | c.87                | p.L29                  | tier1 | 1001 | 9  | 0.009 | 1024 | 294 | 0.223 |
| 856550 | 11 | 5537218   | 5537218   | C                           | T | SNP | UBQLNL          | ENST00000380184 | -1 | missense                    | c.454               | p.V152M                | tier1 | 29   | 0  | 0.000 | 20   | 13  | 0.394 |
| 856550 | 11 | 72294529  | 72294529  | G                           | T | SNP | PDE2A           | ENST00000334456 | -1 | missense                    | c.1681              | p.Q561K                | tier1 | 95   | 0  | 0.000 | 80   | 65  | 0.448 |
| 856550 | 11 | 83770488  | 83770488  | C                           | T | SNP | DLG2            | ENST00000376104 | -1 | silent                      | c.789               | p.V263                 | tier1 | 130  | 0  | 0.000 | 74   | 51  | 0.408 |
| 856550 | 11 | 117282559 | 117282559 | G                           | A | SNP | CEP164          | ENST00000278935 | 1  | silent                      | c.4212              | p.A1404                | tier1 | 16   | 0  | 0.000 | 20   | 18  | 0.474 |
| 856550 | 12 | 25378647  | 25378647  | T                           | A | SNP | KRAS            | ENST00000256078 | -1 | missense                    | c.351               | p.K117N                | tier1 | 603  | 4  | 0.007 | 1082 | 59  | 0.052 |
| 856550 | 12 | 46205132  | 46205132  | T                           | G | SNP | ARID2           | ENST00000334344 | 1  | intronic                    | c.285-69            | e4-69                  | tier3 | 46   | 0  | 0.000 | 69   | 35  | 0.337 |
| 856550 | 12 | 483769    |           |                             |   |     |                 |                 |    |                             |                     |                        |       |      |    |       |      |     |       |

|        |    |           |           |   |     |                |                        |                 |          |                             |                     |           |       |      |       |       |      |       |       |
|--------|----|-----------|-----------|---|-----|----------------|------------------------|-----------------|----------|-----------------------------|---------------------|-----------|-------|------|-------|-------|------|-------|-------|
| 856550 | 15 | 78397250  | 78397250  | T | -   | DEL            | <i>CIB2</i>            | ENST00000258930 | -1       | 3_prime_untranslated_region | c.*403              | NULL      | tier3 | 111  | 2     | 0.018 | 139  | 20    | 0.126 |
| 856550 | 16 | 13297355  | 13297355  | C | G   | SNP            | <i>SHISA9</i>          | ENST00000558583 | 1        | missense                    | c.919               | p.Q307E   | tier1 | 78   | 1     | 0.013 | 59   | 37    | 0.381 |
| 856550 | 17 | 1028517   | 1028517   | C | A   | SNP            | <i>ABR</i>             | ENST00000302538 | -1       | splice_site                 | c.246+1             | e2+1      | tier1 | 107  | 0     | 0.000 | 107  | 79    | 0.425 |
| 856550 | 17 | 11757380  | 11757380  | G | A   | SNP            | <i>DNAH9</i>           | ENST00000262442 | 1        | missense                    | c.9568              | p.A3190T  | tier1 | 730  | 1     | 0.001 | 965  | 31    | 0.031 |
| 856550 | 17 | 48356336  | 48356336  | G | A   | SNP            | <i>TMEM92</i>          | ENST00000300433 | 1        | silent                      | c.345               | p.A115    | tier1 | 154  | 4     | 0.025 | 139  | 85    | 0.380 |
| 856550 | 17 | 59479337  | 59479337  | C | G   | SNP            | <i>TBX2</i>            | ENST00000419047 | 1        | intronic                    | c.441+25            | e2+25     | tier2 | 73   | 0     | 0.000 | 48   | 25    | 0.343 |
| 856550 | 17 | 74387223  | 74387223  | G | C   | SNP            | <i>UBE2O</i>           | ENST00000319380 | -1       | missense                    | c.3680              | p.S1227W  | tier1 | 54   | 0     | 0.000 | 46   | 29    | 0.382 |
| 856550 | 20 | 34099166  | 34099166  | T | C   | SNP            | <i>CEP250</i>          | ENST00000397527 | 1        | intronic                    | c.7066-26           | e32-26    | tier3 | 44   | 0     | 0.000 | 63   | 11    | 0.126 |
| 856550 | 20 | 45052040  | 45052040  | C | T   | SNP            | <i>ELMO2</i>           | ENST00000445496 | -1       | intronic                    | c.1+9493            | e0+9493   | tier4 | 87   | 1     | 0.011 | 46   | 52    | 0.531 |
| 856550 | 20 | 57484420  | 57484420  | C | T   | SNP            | <i>GNAS</i>            | ENST00000354359 | 1        | missense                    | c.604               | p.R202C   | tier1 | 631  | 6     | 0.009 | 457  | 358   | 0.439 |
| 856550 | 21 | 36252998  | 36252998  | C | G   | SNP            | <i>RUNX1</i>           | ENST00000300305 | -1       | missense                    | c.364               | p.G122R   | tier1 | 1222 | 24    | 0.019 | 206  | 1486  | 0.878 |
| 856550 | 22 | 16414079  | 16414079  | G | A   | SNP            | <i>ENSG00000215268</i> | ENST00000417863 | 1        | 3_prime_untranslated_region | c.*16414079         | NULL      | tier3 | 182  | 9     | 0.047 | 160  | 73    | 0.312 |
| 856550 | 22 | 17029213  | 17029213  | A | G   | SNP            | <i>ENSG00000233995</i> | ENST00000454360 | 1        | 5_prime_flanking_region     | c.-23704            | NULL      | tier3 | 483  | 7     | 0.014 | 570  | 32    | 0.053 |
| 856550 | 22 | 18628675  | 18628675  | C | T   | SNP            | <i>TUBA8</i>           | ENST00000608634 | 1        | missense                    | c.745               | p.R249C   | tier1 | 82   | 1     | 0.012 | 56   | 71    | 0.559 |
| 856550 | 22 | 45277142  | 45277142  | G | A   | SNP            | <i>PHF21B</i>          | ENST00000313237 | -1       | 3_prime_untranslated_region | c.*1824             | NULL      | tier2 | 156  | 1     | 0.006 | 150  | 96    | 0.390 |
| 856550 | X  | 41782248  | 41782248  | G | C   | SNP            | <i>CASK</i>            | ENST00000468986 | -1       | rna                         | NULL                | NULL      | tier1 | 96   | 0     | 0.000 | 69   | 54    | 0.439 |
| 856550 | X  | 86063662  | 86063662  | A | G   | SNP            | <i>DACH2</i>           | ENST00000373125 | 1        | intronic                    | c.1241-4197         | e8-4197   | tier3 | 136  | 0     | 0.000 | 146  | 84    | 0.362 |
| 856550 | X  | 133527979 | 133527979 | G | T   | SNP            | <i>PHF6</i>            | ENST00000394292 | 1        | nonsense                    | c.415               | p.E139*   | tier1 | 561  | 3     | 0.005 | 683  | 498   | 0.422 |
| 875301 | 1  | 1717243   | 1717243   | T | -   | DEL            | <i>GNB1</i>            | ENST00000378609 | -1       | 3_prime_untranslated_region | c.*1527             | NULL      | tier2 | 39   | 0     | 0.000 | 25   | 7     | 0.219 |
| 875301 | 1  | 148887714 | 148887714 | C | T   | SNP            | <i>ENSG00000231448</i> | ENST00000444424 | 1        | 3_prime_untranslated_region | c.*148887714        | NULL      | tier2 | 1927 | 1     | 0.001 | 2460 | 75    | 0.030 |
| 875301 | 2  | 64807082  | 64807082  | T | G   | SNP            | <i>AFTPH</i>           | ENST00000498706 | 1        | 3_prime_untranslated_region | c.*64807082         | NULL      | tier3 | 194  | 0     | 0.000 | 135  | 11    | 0.075 |
| 875301 | 2  | 179321040 | 179321040 | A | -   | DEL            | <i>DFNB59</i>          | ENST00000375129 | 1        | intronic                    | c.549+162           | e3+162    | tier3 | 108  | 1     | 0.009 | 73   | 10    | 0.121 |
| 875301 | 2  | 198264776 | 198264776 | T | G   | SNP            | <i>SF3B1</i>           | ENST00000335508 | -1       | splice_region               | c.3013+3            | e20+3     | tier3 | 605  | 0     | 0.000 | 577  | 42    | 0.068 |
| 875301 | 2  | 198267359 | 198267359 | C | G   | SNP            | <i>SF3B1</i>           | ENST00000335508 | -1       | missense                    | c.1998              | p.K666N   | tier1 | 828  | 1     | 0.001 | 926  | 46    | 0.047 |
| 875301 | 3  | 50334761  | 50334761  | G | C   | SNP            | <i>NAT6</i>            | ENST00000354862 | -1       | missense                    | c.200               | p.P67R    | tier1 | 64   | 0     | 0.000 | 64   | 9     | 0.123 |
| 875301 | 4  | 183723267 | 183723267 | G | A   | SNP            | <i>TENM3</i>           | ENST00000511685 | 1        | 3_prime_untranslated_region | c.*1763             | NULL      | tier2 | 94   | 0     | 0.000 | 57   | 7     | 0.109 |
| 875301 | 7  | 48467344  | 48467345  | - | T   | INS            | <i>ABCA13</i>          | ENST00000435803 | 1        | intronic                    | c.12460-19_12460-18 | e42-18    | tier3 | 130  | 0     | 0.000 | 126  | 14    | 0.100 |
| 875301 | 7  | 50450292  | 50450292  | A | G   | SNP            | <i>IKZF1</i>           | ENST00000331340 | 1        | missense                    | c.476               | p.N159S   | tier1 | 292  | 0     | 0.000 | 404  | 19    | 0.045 |
| 875301 | 7  | 104946931 | 104946932 | - | A   | INS            | <i>SRPK2</i>           | ENST00000465112 | -1       | frame_shift_ins             | c.159_158           | p.L53fs   | tier1 | 108  | 0     | 0.000 | 75   | 9     | 0.107 |
| 875301 | 9  | 79256934  | 79256934  | G | A   | SNP            | <i>PRUNE2</i>          | ENST00000428286 | -1       | intronic                    | c.7654+2721         | e5+2721   | tier4 | 20   | 0     | 0.000 | 22   | 10    | 0.313 |
| 875301 | 11 | 33361114  | 33361114  | A | -   | DEL            | <i>HIPK3</i>           | ENST00000303296 | 1        | intronic                    | c.1613+34           | e5+34     | tier3 | 113  | 2     | 0.017 | 54   | 9     | 0.143 |
| 875301 | 11 | 121475955 | 121475955 | C | T   | SNP            | <i>SORL1</i>           | ENST00000260197 | 1        | splice_region               | c.4778+7            | e34+7     | tier3 | 119  | 0     | 0.000 | 128  | 12    | 0.086 |
| 875301 | 12 | 31247676  | 31247676  | T | A   | SNP            | <i>DDX11</i>           | ENST00000407793 | 1        | intronic                    | c.1415-13           | e13-13    | tier3 | 505  | 1     | 0.002 | 546  | 29    | 0.050 |
| 875301 | 15 | 60745782  | 60745782  | A | -   | DEL            | <i>NARG2</i>           | ENST00000561114 | -1       | frame_shift_del             | c.1145              | p.F382fs  | tier1 | 91   | 1     | 0.011 | 41   | 7     | 0.146 |
| 876752 | 1  | 153190890 | 153190890 | G | A   | SNP            | <i>PRR9</i>            | ENST00000368744 | 1        | silent                      | c.270               | p.Q90     | tier1 | 73   | 0     | 0.000 | 49   | 26    | 0.347 |
| 876752 | 1  | 207881643 | 207881643 | A | G   | SNP            | <i>CR1L</i>            | ENST00000508064 | 1        | intronic                    | c.1414+35           | e10+35    | tier4 | 278  | 3     | 0.011 | 337  | 63    | 0.158 |
| 876752 | 1  | 207881649 | 207881649 | C | T   | SNP            | <i>CR1L</i>            | ENST00000508064 | 1        | intronic                    | c.1414+41           | e10+41    | tier4 | 267  | 2     | 0.007 | 318  | 60    | 0.157 |
| 876752 | 1  | 237947039 | 237947039 | C | T   | SNP            | <i>RYR2</i>            | ENST00000360064 | 1        | silent                      | c.12045             | p.N4015   | tier1 | 150  | 1     | 0.007 | 94   | 54    | 0.365 |
| 876752 | 2  | 1099077   | 1099077   | A | T   | SNP            | <i>SNTG2</i>           | ENST00000308624 | 1        | intronic                    | c.325+4981          | e4+4981   | tier4 | 34   | 0     | 0.000 | 45   | 11    | 0.196 |
| 876752 | 2  | 233899445 | 233899445 | G | A   | SNP            | <i>NEU2</i>            | ENST00000233840 | 1        | missense                    | c.821               | p.G274E   | tier1 | 50   | 3     | 0.057 | 35   | 20    | 0.357 |
| 876752 | 3  | 37340696  | 37340696  | A | -   | DEL            | <i>GOLGA4</i>          | ENST00000361924 | 1        | intronic                    | c.1003-83           | e9-83     | tier3 | 144  | 1     | 0.007 | 144  | 98    | 0.405 |
| 876752 | 3  | 38621021  | 38621021  | C | T   | SNP            | <i>SCN5A</i>           | ENST00000333535 | -1       | intronic                    | c.3229-35           | e17-35    | tier3 | 40   | 0     | 0.000 | 20   | 13    | 0.382 |
| 876752 | 4  | 82026868  | 82026868  | C | T   | SNP            | <i>PRKG2</i>           | ENST00000264399 | -1       | intronic                    | c.2063+99           | e15+99    | tier3 | 106  | 1     | 0.009 | 82   | 73    | 0.468 |
| 876752 | 11 | 193204    | 193204    | G | SNP | <i>SCGB1C1</i> | ENST00000342878        | 1               | intronic | c.55+50                     | e1+50               | tier3     | 169   | 4    | 0.023 | 141   | 22   | 0.133 |       |
| 876752 | 11 | 71373771  | 71373771  | T | A   | SNP            | <i>ENPP7P8</i>         | ENST00000529093 | 1        | 5_prime_flanking_region     | c.-49015            | NULL      | tier3 | 630  | 8     | 0.013 | 504  | 312   | 0.382 |
| 876752 | 15 | 21119477  | 21119477  | T | C   | SNP            | <i>POTEB2</i>          | ENST00000454856 | -1       | 5_prime_flanking_region     | c.-47867            | NULL      | tier4 | 51   | 0     | 0.000 | 64   | 11    | 0.147 |
| 876752 | 15 | 90631934  | 90631934  | C | T   | SNP            | <i>IDH2</i>            | ENST00000330062 | -1       | missense                    | c.419               | p.R140Q   | tier1 | 660  | 0     | 0.000 | 790  | 29    | 0.035 |
| 876752 | 16 | 32890900  | 32890900  | C | T   | SNP            | <i>SLC6A10P</i>        | ENST00000330048 | -1       | intronic                    | c.NULL              | NULL      | tier3 | 301  | 0     | 0.000 | 262  | 11    | 0.040 |
| 876752 | 16 | 84227714  | 84227714  | G | A   | SNP            | <i>ADAD2</i>           | ENST00000268624 | 1        | missense                    | c.521               | p.R174H   | tier1 | 103  | 0     | 0.000 | 62   | 54    | 0.466 |
| 876752 | 17 | 6703354   | 6703354   | C | G   | SNP            | <i>TEKT1</i>           | ENST00000338694 | -1       | missense                    | c.1249              | p.V417L   | tier1 | 40   | 0     | 0.000 | 19   | 23    | 0.548 |
| 876752 | 18 | 47380016  | 47380016  | G | A   | SNP            | <i>MYO5B</i>           | ENST00000285039 | -1       | silent                      | c.4024              | p.L1342   | tier1 | 380  | 6     | 0.016 | 290  | 209   | 0.418 |
| 876752 | 19 | 7944301   | 7944301   | G | A   | SNP            | <i>FLJ22184</i>        | ENST00000539422 | -1       | 5_prime_flanking_region     | c.-5727             | NULL      | tier3 | 73   | 0     | 0.000 | 50   | 39    | 0.438 |
| 876752 | 22 | 21153574  | 21153574  | G | A   | SNP            | <i>PI4KA</i>           | ENST00000255882 | -1       | splice_region               | c.1821-10           | e16-10    | tier3 | 73   | 1     | 0.014 | 51   | 42    | 0.452 |
| 882325 | 1  | 112525116 | 112525116 | T | G   | SNP            | <i>KCND3</i>           | ENST00000315987 | -1       | missense                    | c.233               | p.D78A    | tier1 | 57   | 1     | 0.017 | 84   | 46    | 0.351 |
| 882325 | 1  | 152186038 | 152186038 | A | -   | DEL            | <i>HRNR</i>            | ENST00000368801 | -1       | frame_shift_del             | c.8067              | p.H2690fs | tier1 | 14   | 0     | 0.000 | 7    | 10    | 0.588 |
| 882325 | 1  | 152186047 | 152186047 | A | -   | DEL            | <i>HRNR</i>            | ENST00000368801 | -1       | frame_shift_del             | c.8058              | p.R2687fs | tier1 | 10   | 0     | 0.000 | 5    | 10    | 0.667 |
| 882325 | 1  | 220369746 | 220369746 | A | -   | DEL            | <i>RAB3GAP2</i>        | ENST00000358951 | -1       | splice_region_del           | c.812-6             | e10-6     | tier3 | 77   | 1     | 0.013 | 178  | 24    | 0.119 |
| 882325 | 1  | 228464970 | 228464970 | G | T   | SNP            | <i>OBSCN</i>           | ENST00000422127 | 1        | missense                    | c.6710              | p.C2237F  | tier1 | 35   | 0     | 0.000 | 50   | 40    | 0.444 |
| 882325 | 1  | 228464971 | 228464971 | T | A   | SNP            | <i>OBSCN</i>           | ENST00000422127 | 1        | nonsense                    | c.6711              | p.C2237*  | tier1 | 37   | 0     | 0.000 | 51   | 40    | 0.440 |
| 882325 | 2  | 25457242  | 25457242  | C | T   | SNP            | <i>DNMT3A</i>          | ENST00000264709 | -1       | missense                    | c.2645              | p.R882H   | tier1 | 270  | 9     | 0.032 | 370  | 228   | 0.380 |
| 882325 | 2  | 209113112 | 209113112 | C | A   | SNP            | <i>IDH1</i>            | ENST00000345146 | -1       | missense                    | c.395               | p.R132L   | tier1 | 301  | 1     | 0.003 | 564  | 362   | 0.391 |
| 882325 | 2  | 211421474 | 211421474 | C | T   | SNP            | <i>CPS1</i>            | ENST00000430249 | 1        | missense                    | c.35                | p.T12I    | tier1 | 76   | 1     | 0.013 | 158  | 66    | 0.295 |
| 882325 | 2  | 238253632 | 238253632 | T | C   | SNP            | <i>COL6A3</i>          | ENST00000295550 | -1       | intronic                    | c.7163-37           | e34-37    | tier3 | 71   | 2     | 0.027 | 103  | 45    | 0.302 |
| 882325 | 3  | 38948846  | 38948846  | T | C   | SNP            | <i>ENSG00000215941</i> | ENST00000401122 | 1        | rna                         | NULL                | NULL      | tier1 | 19   | 0     | 0.000 | 31   | 21    | 0.404 |
| 882325 | 3  | 184100959 | 184100959 | G | -   | DEL            | <i>CHRD</i>            | ENST00000460627 | 1        | 3_prime_untranslated_region | c.*184100959        | NULL      | tier3 | 82   | 2     | 0.024 | 114  | 22    | 0.162 |
| 882325 | 4  | 9785355   | 9785355   | A | -   | DEL            | <i>DRD5</i>            | ENST00000304374 | 1        | 3_prime_untranslated_region | c.*268              | NULL      | tier3 | 53   | 0     | 0.000 | 143  | 20    | 0.123 |
| 882325 | 4  | 170913470 | 170913470 | G | A   | SNP            | <i>MFAP3L</i>          | ENST00000361618 | -1       | splice_region               | c.299-10            | e2-10     | tier3 | 31   |       |       |      |       |       |

|        |    |           |           |   |   |     |                 |                 |    |                             |                 |           |       |     |    |       |      |      |       |
|--------|----|-----------|-----------|---|---|-----|-----------------|-----------------|----|-----------------------------|-----------------|-----------|-------|-----|----|-------|------|------|-------|
| 882325 | 12 | 21051353  | 21051353  | C | A | SNP | SLCO1B3         | ENST00000553473 | 1  | intronic                    | c.1683-17       | e12-17    | tier2 | 110 | 1  | 0.009 | 246  | 125  | 0.336 |
| 882325 | 12 | 111655648 | 111655648 | G | A | SNP | CUX2            | ENST00000261726 | 1  | intronic                    | c.175-46        | e3-46     | tier3 | 70  | 0  | 0.000 | 104  | 41   | 0.279 |
| 882325 | 14 | 74196463  | 74196464  | - | G | INS | ELMSAN1         | ENST00000286523 | -1 | frame_shift_ins             | c.1975_1974     | p.I658fs  | tier1 | 52  | 1  | 0.019 | 43   | 25   | 0.368 |
| 882325 | 15 | 33833126  | 33833126  | G | T | SNP | RYR3            | ENST00000389232 | 1  | intronic                    | c.646+35        | e7+35     | tier3 | 188 | 1  | 0.005 | 357  | 273  | 0.432 |
| 882325 | 17 | 74732959  | 74732959  | G | A | SNP | SRSF2           | ENST00000359995 | -1 | missense                    | c.284           | p.P95L    | tier1 | 320 | 2  | 0.006 | 427  | 232  | 0.352 |
| 882325 | 18 | 55996142  | 55996142  | G | A | SNP | NEDD4L          | ENST00000400345 | 1  | intronic                    | c.681-85        | e10-85    | tier3 | 23  | 0  | 0.000 | 40   | 25   | 0.379 |
| 882325 | 19 | 2435136   | 2435136   | G | A | SNP | LMNB2           | ENST00000325327 | -1 | missense                    | c.718           | p.R240C   | tier1 | 15  | 0  | 0.000 | 21   | 15   | 0.417 |
| 882325 | X  | 50350816  | 50350816  | C | G | SNP | SHROOM4         | ENST00000289292 | -1 | missense                    | c.3326          | p.W1109S  | tier1 | 25  | 1  | 0.039 | 9    | 25   | 0.735 |
| 882325 | X  | 53441798  | 53441798  | A | G | SNP | SMO1A           | ENST00000322213 | -1 | missense                    | c.320           | p.I107T   | tier1 | 222 | 2  | 0.009 | 440  | 64   | 0.126 |
| 882325 | X  | 77911875  | 77911875  | T | C | SNP | ZCCHC5          | ENST00000321110 | -1 | 3_prime_untranslated_region | c.*615          | NULL      | tier2 | 32  | 1  | 0.030 | 37   | 56   | 0.602 |
| 907471 | 1  | 221875157 | 221875157 | A | - | DEL | DUSP10          | ENST00000468085 | -1 | rna                         | NULL            | NULL      | tier1 | 40  | 0  | 0.000 | 40   | 11   | 0.216 |
| 907471 | 1  | 237947546 | 237947546 | C | T | SNP | RYR2            | ENST00000360064 | 1  | silent                      | c.12552         | p.N4184   | tier1 | 304 | 2  | 0.007 | 454  | 23   | 0.048 |
| 907471 | 2  | 25457243  | 25457243  | G | A | SNP | DNMT3A          | ENST00000264709 | -1 | missense                    | c.2644          | p.R882C   | tier1 | 309 | 1  | 0.003 | 399  | 18   | 0.043 |
| 907471 | 5  | 82817864  | 82817864  | G | A | SNP | VCAN            | ENST00000265077 | 1  | missense                    | c.3739          | p.D1247N  | tier1 | 811 | 0  | 0.000 | 1203 | 28   | 0.023 |
| 907471 | 5  | 112227415 | 112227415 | G | A | SNP | ZRSR1           | ENST00000391338 | 1  | missense                    | c.79            | p.A27T    | tier1 | 636 | 0  | 0.000 | 793  | 25   | 0.031 |
| 907471 | 5  | 142301123 | 142301123 | G | T | SNP | ARHGAP26        | ENST00000477867 | 1  | rna                         | NULL            | NULL      | tier1 | 225 | 0  | 0.000 | 175  | 11   | 0.059 |
| 907471 | 5  | 142301124 | 142301124 | G | T | SNP | ARHGAP26        | ENST00000477867 | 1  | rna                         | NULL            | NULL      | tier1 | 225 | 0  | 0.000 | 174  | 10   | 0.054 |
| 907471 | 7  | 126716306 | 126716306 | G | A | SNP | GRM8            | ENST00000339582 | -1 | intronic                    | c.727+30244     | e2+30244  | tier3 | 341 | 0  | 0.000 | 462  | 16   | 0.033 |
| 907471 | 12 | 32948971  | 32948971  | C | T | SNP | PKP2            | ENST0000070846  | -1 | intronic                    | c.2489+72       | e12+72    | tier3 | 72  | 0  | 0.000 | 121  | 14   | 0.104 |
| 907471 | 12 | 55820945  | 55820945  | G | A | SNP | OR6C76          | ENST00000328314 | 1  | missense                    | c.908           | p.R303K   | tier1 | 29  | 0  | 0.000 | 23   | 8    | 0.258 |
| 907471 | 12 | 111701486 | 111701487 | - | A | INS | CUX2            | ENST00000261726 | 1  | intronic                    | c.223-79_223-78 | e4-78     | tier3 | 76  | 0  | 0.000 | 121  | 13   | 0.097 |
| 907471 | 14 | 36334922  | 36334922  | A | T | SNP | BRMS1L          | ENST00000216807 | 1  | splice_region               | c.688-6         | e8-6      | tier4 | 47  | 2  | 0.041 | 35   | 16   | 0.314 |
| 907471 | 16 | 89805075  | 89805075  | G | A | SNP | FANCA           | ENST00000389301 | -1 | silent                      | c.4302          | p.A1434   | tier1 | 814 | 0  | 0.000 | 1086 | 27   | 0.024 |
| 907471 | 21 | 19628809  | 19628810  | - | T | INS | CHODL           | ENST00000299295 | 1  | intronic                    | c.80-17_80-16   | e2-16     | tier3 | 12  | 0  | 0.000 | 13   | 13   | 0.500 |
| 913698 | 1  | 91973859  | 91973859  | A | G | SNP | CDC7            | ENST00000234626 | 1  | silent                      | c.240           | p.Q80     | tier1 | 128 | 3  | 0.023 | 194  | 102  | 0.345 |
| 913698 | 1  | 118426264 | 118426264 | G | A | SNP | GDAP2           | ENST00000369443 | -1 | intronic                    | c.1108-15       | e10-15    | tier3 | 56  | 0  | 0.000 | 79   | 44   | 0.358 |
| 913698 | 1  | 142826527 | 142826527 | G | A | SNP | ANKRD20A14P     | ENST00000457776 | 1  | 3_prime_untranslated_region | c.*142826527    | NULL      | tier3 | 22  | 1  | 0.044 | 20   | 23   | 0.535 |
| 913698 | 1  | 182791320 | 182791320 | G | A | SNP | NPL             | ENST00000258317 | 1  | missense                    | c.724           | p.A242T   | tier1 | 95  | 3  | 0.031 | 157  | 63   | 0.286 |
| 913698 | 2  | 132723935 | 132723935 | G | A | SNP | ENSG00000235615 | ENST00000419362 | -1 | rna                         | NULL            | NULL      | tier1 | 9   | 0  | 0.000 | 2    | 9    | 0.818 |
| 913698 | 2  | 196636498 | 196636498 | G | A | SNP | DNAH7           | ENST00000312428 | -1 | silent                      | c.11319         | p.Y3773   | tier1 | 102 | 0  | 0.000 | 205  | 40   | 0.162 |
| 913698 | 2  | 227924194 | 227924194 | C | T | SNP | COL4A4          | ENST00000396625 | -1 | silent                      | c.2310          | p.P770    | tier1 | 75  | 3  | 0.039 | 152  | 65   | 0.298 |
| 913698 | 3  | 47050909  | 47050909  | G | - | DEL | NBEAL2          | ENST00000450053 | -1 | 3_prime_untranslated_region | c.*99           | NULL      | tier2 | 6   | 0  | 0.000 | 8    | 15   | 0.652 |
| 913698 | 3  | 112300106 | 112300106 | C | T | SNP | SLC35A5         | ENST00000492406 | 1  | missense                    | c.1142          | p.P381L   | tier1 | 75  | 4  | 0.051 | 133  | 51   | 0.276 |
| 913698 | 4  | 1656787   | 1656787   | C | T | SNP | FAM53A          | ENST00000308132 | -1 | missense                    | c.800           | p.G267E   | tier1 | 21  | 0  | 0.000 | 23   | 23   | 0.489 |
| 913698 | 4  | 184019703 | 184019703 | C | G | SNP | WWC2-AS2        | ENST00000506413 | -1 | rna                         | NULL            | NULL      | tier1 | 11  | 0  | 0.000 | 6    | 7    | 0.539 |
| 913698 | 5  | 43277155  | 43277155  | G | A | SNP | NIM1            | ENST00000326035 | 1  | splice_region               | c.293-4         | e2-4      | tier3 | 42  | 1  | 0.023 | 63   | 27   | 0.300 |
| 913698 | 6  | 26536971  | 26536971  | A | - | DEL | HMGNA4          | ENST00000377575 | 1  | 5_prime_flanking_region     | c.-8464         | NULL      | tier2 | 34  | 0  | 0.000 | 59   | 14   | 0.192 |
| 913698 | 7  | 100468311 | 100468311 | C | T | SNP | TRIP6           | ENST00000429658 | 1  | missense                    | c.266           | p.A89V    | tier1 | 65  | 0  | 0.000 | 142  | 32   | 0.184 |
| 913698 | 9  | 119461034 | 119461034 | C | T | SNP | TRIM32          | ENST00000373983 | 1  | missense                    | c.1013          | p.A338V   | tier1 | 41  | 0  | 0.000 | 52   | 32   | 0.381 |
| 913698 | 9  | 124530916 | 124530916 | G | G | SNP | DAB2IP          | ENST00000408936 | 1  | splice_region               | c.1899+4        | e10+4     | tier3 | 92  | 4  | 0.042 | 110  | 56   | 0.335 |
| 913698 | 11 | 5536564   | 5536564   | C | A | SNP | UBQLNL          | ENST00000380184 | -1 | missense                    | c.1108          | p.H370Y   | tier1 | 29  | 1  | 0.033 | 42   | 21   | 0.333 |
| 913698 | 11 | 6891758   | 6891758   | A | T | SNP | OR10A2          | ENST00000307322 | 1  | missense                    | c.773           | p.K258M   | tier1 | 36  | 3  | 0.039 | 72   | 64   | 0.377 |
| 913698 | 11 | 120744937 | 120744937 | G | A | SNP | GRIK4           | ENST00000527524 | 1  | splice_region               | c.1059+10       | e8+10     | tier3 | 301 | 7  | 0.023 | 515  | 191  | 0.270 |
| 913698 | 12 | 91363823  | 91363823  | G | A | SNP | EPYC            | ENST00000261172 | -1 | nonsense                    | c.796           | p.Q266*   | tier1 | 130 | 0  | 0.000 | 241  | 38   | 0.136 |
| 913698 | 15 | 41223819  | 41223819  | C | - | DEL | DLL4            | ENST00000249749 | 1  | frame_shift_del             | c.513           | p.R172fs  | tier1 | 49  | 2  | 0.039 | 75   | 35   | 0.318 |
| 913698 | 15 | 90631934  | 90631934  | C | T | SNP | IDH2            | ENST00000330062 | -1 | missense                    | c.419           | p.R140Q   | tier1 | 358 | 3  | 0.008 | 838  | 203  | 0.195 |
| 913698 | 16 | 88808530  | 88808530  | G | A | SNP | ENSG00000260617 | ENST00000566114 | 1  | rna                         | NULL            | NULL      | tier1 | 229 | 3  | 0.013 | 547  | 38   | 0.065 |
| 913698 | 17 | 39122986  | 39122986  | G | A | SNP | KRT39           | ENST00000355612 | -1 | silent                      | c.123           | p.V41     | tier1 | 64  | 3  | 0.045 | 142  | 57   | 0.286 |
| 913698 | 17 | 74732959  | 74732959  | G | T | SNP | SRSF2           | ENST00000359995 | -1 | missense                    | c.284           | p.P95H    | tier1 | 199 | 1  | 0.005 | 414  | 165  | 0.285 |
| 913698 | 20 | 31022441  | 31022442  | - | G | INS | ASXL1           | ENST00000375687 | 1  | frame_shift_ins             | c.1926_1927     | p.G645fs  | tier1 | 590 | 12 | 0.020 | 1159 | 352  | 0.233 |
| 913698 | 20 | 40701696  | 40701696  | C | T | SNP | PTPR1           | ENST00000373198 | -1 | 3_prime_untranslated_region | c.*7823         | NULL      | tier2 | 62  | 0  | 0.000 | 80   | 26   | 0.245 |
| 913698 | 20 | 60773672  | 60773672  | G | A | SNP | MTG2            | ENST00000370823 | 1  | intronic                    | c.469-18        | e4-18     | tier3 | 52  | 3  | 0.055 | 95   | 41   | 0.302 |
| 913698 | 21 | 36252877  | 36252877  | C | T | SNP | RUNX1           | ENST00000300305 | -1 | missense                    | c.485           | p.R162K   | tier1 | 921 | 54 | 0.055 | 761  | 1152 | 0.602 |
| 913698 | X  | 52679352  | 52679352  | T | G | SNP | SSX7            | ENST00000298181 | -1 | intronic                    | c.330+51        | e4+51     | tier3 | 254 | 6  | 0.023 | 486  | 218  | 0.309 |
| 913698 | X  | 140967238 | 140967238 | G | A | SNP | MAGEC3          | ENST00000298296 | 1  | intronic                    | c.515+21        | e3+21     | tier3 | 180 | 6  | 0.032 | 258  | 104  | 0.287 |
| 918051 | 1  | 94586694  | 94586694  | A | G | SNP | ABCA4           | ENST00000370225 | -1 | 5_prime_flanking_region     | c.-93           | NULL      | tier3 | 31  | 0  | 0.000 | 88   | 61   | 0.409 |
| 918051 | 1  | 94586695  | 94586695  | C | G | SNP | ABCA4           | ENST00000370225 | -1 | 5_prime_flanking_region     | c.-94           | NULL      | tier3 | 32  | 0  | 0.000 | 88   | 61   | 0.409 |
| 918051 | 1  | 150121929 | 150121929 | C | G | SNP | PLEKHO1         | ENST00000369126 | 1  | 5_prime_untranslated_region | c.-9109         | NULL      | tier2 | 11  | 0  | 0.000 | 27   | 36   | 0.571 |
| 918051 | 1  | 152186047 | 152186047 | A | - | DEL | HRNR            | ENST00000368801 | -1 | frame_shift_del             | c.8058          | p.R2687fs | tier1 | 8   | 0  | 0.000 | 3    | 6    | 0.667 |
| 918051 | 2  | 128621736 | 128621736 | C | T | SNP | AMMECR1L        | ENST00000272647 | -1 | 3_prime_untranslated_region | c.*932          | NULL      | tier3 | 8   | 0  | 0.000 | 59   | 90   | 0.604 |
| 918051 | 3  | 112998095 | 112998095 | G | A | SNP | BOC             | ENST00000273395 | 1  | splice_site                 | c.1817-1        | e10-1     | tier1 | 14  | 0  | 0.000 | 31   | 39   | 0.549 |
| 918051 | 4  | 7780663   | 7780664   | - | T | INS | AFAP1           | ENST00000505447 | -1 | 5_prime_untranslated_region | c.-7780663      | NULL      | tier3 | 80  | 0  | 0.000 | 106  | 11   | 0.094 |
| 918051 | 5  | 36876937  | 36876937  | C | - | DEL | NIPBL           | ENST00000282516 | 1  | 5_prime_untranslated_region | c.-76862        | NULL      | tier2 | 52  | 1  | 0.019 | 137  | 51   | 0.271 |
| 918051 | 5  | 140232564 | 140232564 | C | T | SNP | PCDHA9          | ENST00000378122 | 1  | 3_prime_untranslated_region | c.*1955         | NULL      | tier4 | 36  | 0  | 0.000 | 13   | 7    | 0.350 |
| 918051 | 6  | 32557378  | 32557378  | T | C | SNP | HLA-DRB1        | ENST00000360004 | -1 | intronic                    | c.100+42        | e1+42     | tier3 | 31  | 0  | 0.000 | 158  | 37   | 0.190 |
| 918051 | 7  | 105668989 | 105668989 | C | T | SNP | CDHR3           | ENST00000468143 | 1  | 3_prime_untranslated_region | c.*105668989    | NULL      | tier3 | 45  | 0  | 0.000 | 82   | 72   | 0.468 |
| 918051 | 9  | 2907139   | 2907139   | G | A | SNP | CARM1P1         | ENST00000426329 | -1 | 5_prime_untranslated_region | c.-2907139      | NULL      | tier3 | 14  | 0  | 0.000 | 82   | 53   | 0.393 |
| 918051 | 9  | 88452656  | 88452656  | C | T | SNP | ENSG00000165121 | ENST00000431724 | 1  | intronic                    | c.NULL          | NULL      | tier3 | 48  | 0  | 0.000 | 126  | 77   | 0.379 |
| 918051 | 10 | 19616672  | 19616672  | T | A | SNP | C10orf112       | ENST00000454679 | 1  | intronic                    | c.1575+70       |           |       |     |    |       |      |      |       |

|        |    |           |           |                 |      |       |                 |                 |    |                             |                       |                    |       |      |    |       |      |     |       |
|--------|----|-----------|-----------|-----------------|------|-------|-----------------|-----------------|----|-----------------------------|-----------------------|--------------------|-------|------|----|-------|------|-----|-------|
| 918051 | 11 | 20696148  | 20696148  | G               | A    | SNP   | NELL1           | ENST00000357134 | 1  | intronic                    | c.56-3330             | e2-3330            | tier4 | 9    | 0  | 0.000 | 35   | 42  | 0.546 |
| 918051 | 11 | 63342376  | 63342376  | T               | C    | SNP   | PLA2G16         | ENST00000394613 | -1 | rna                         | NULL                  | NULL               | tier1 | 23   | 0  | 0.000 | 84   | 69  | 0.451 |
| 918051 | 11 | 92533422  | 92533422  | T               | C    | SNP   | FAT3            | ENST00000298047 | 1  | missense                    | c.7243                | p.C2415R           | tier1 | 17   | 0  | 0.000 | 88   | 59  | 0.401 |
| 918051 | 12 | 116446681 | 116446681 | T               | C    | SNP   | MED13L          | ENST00000281928 | -1 | missense                    | c.1537                | p.I513V            | tier1 | 22   | 0  | 0.000 | 87   | 68  | 0.439 |
| 918051 | 13 | 42118880  | 42118880  | A               | G    | SNP   | VWA8            | ENST00000379310 | -1 | 3_prime_flanking_region     | c.*23453              | NULL               | tier4 | 30   | 0  | 0.000 | 51   | 13  | 0.203 |
| 918051 | 14 | 57070634  | 57070634  | A               | G    | SNP   | TMEM260         | ENST00000261556 | 1  | missense                    | c.446                 | p.N149S            | tier1 | 134  | 0  | 0.000 | 496  | 391 | 0.440 |
| 918051 | 15 | 62359822  | 62359822  | C               | A    | SNP   | C2CD4A          | ENST00000355522 | 1  | missense                    | c.10                  | p.L4M              | tier1 | 22   | 0  | 0.000 | 63   | 50  | 0.443 |
| 918051 | 16 | 780298    | 780298    | G               | A    | SNP   | NARFL           | ENST00000562862 | -1 | rna                         | NULL                  | NULL               | tier1 | 25   | 0  | 0.000 | 96   | 77  | 0.445 |
| 918051 | 19 | 1026637   | 1026637   | C               | A    | SNP   | CNN2            | ENST00000562015 | 1  | rna                         | NULL                  | NULL               | tier1 | 9    | 0  | 0.000 | 14   | 22  | 0.611 |
| 918051 | 19 | 37063218  | 37063219  | -               | A    | INS   | ZNF529          | ENST00000591340 | -1 | intronic                    | c.14+16_14+15         | e1+16              | tier3 | 12   | 0  | 0.000 | 57   | 42  | 0.424 |
| 918051 | 19 | 39869235  | 39869235  | G               | A    | SNP   | SAMD4B          | ENST00000314471 | 1  | splice_region               | c.1530+6              | e7+6               | tier3 | 23   | 0  | 0.000 | 35   | 21  | 0.375 |
| 918051 | 20 | 1920551   | 1920551   | T               | C    | SNP   | LOC727993       | ENST00000446562 | 1  | 5_prime_flanking_region     | c.-7341               | NULL               | tier2 | 49   | 2  | 0.039 | 60   | 48  | 0.444 |
| 918051 | 20 | 34022502  | 34022502  | G               | A    | SNP   | GDF5            | ENST00000374369 | -1 | silent                      | c.711                 | p.A237             | tier1 | 11   | 0  | 0.000 | 30   | 28  | 0.483 |
| 918051 | 20 | 44979120  | 44979120  | G               | C    | SNP   | SLC35C2         | ENST00000543605 | -1 | silent                      | c.1098                | p.P366             | tier1 | 29   | 0  | 0.000 | 73   | 75  | 0.507 |
| 918051 | 22 | 23055600  | 23055600  | C               | T    | SNP   | IGLV3-21        | ENST00000390308 | 1  | missense                    | c.263                 | p.T88M             | tier1 | 40   | 0  | 0.000 | 74   | 63  | 0.460 |
| 918051 | X  | 123197782 | 123197783 | -               | A    | INS   | STAG2           | ENST00000218089 | 1  | frame_shift_ins             | c.1906_1907           | p.Y636fs           | tier1 | 37   | 0  | 0.000 | 117  | 468 | 0.800 |
| 922185 | 1  | 149400471 | 149400471 | T               | C    | SNP   | HIST2H3PS2      | ENST00000392948 | -1 | silent                      | c.72                  | p.K24              | tier1 | 188  | 4  | 0.021 | 197  | 57  | 0.224 |
| 922185 | 2  | 20100829  | 20100829  | T               | A    | SNP   | TTC32           | ENST00000431392 | -1 | silent                      | c.54                  | p.S18              | tier1 | 85   | 0  | 0.000 | 115  | 38  | 0.248 |
| 922185 | 2  | 179638759 | 179638759 | A               | G    | SNP   | TTN             | ENST00000342992 | -1 | missense                    | c.7136                | p.V2379A           | tier1 | 77   | 0  | 0.000 | 110  | 14  | 0.113 |
| 922185 | 4  | 25930000  | 25930000  | A               | -    | DEL   | SMIM20          | ENST00000506197 | 1  | splice_region_del           | c.166+9               | e2+9               | tier3 | 87   | 0  | 0.000 | 112  | 15  | 0.118 |
| 922185 | 4  | 71463976  | 71463976  | C               | T    | SNP   | AMB1            | ENST00000322937 | 1  | intronic                    | c.136-97              | e4-97              | tier3 | 74   | 1  | 0.013 | 128  | 20  | 0.135 |
| 922185 | 4  | 100544120 | 100544120 | T               | A    | SNP   | MTTP            | ENST00000265517 | 1  | 3_prime_untranslated_region | c.*115                | NULL               | tier3 | 77   | 0  | 0.000 | 109  | 32  | 0.227 |
| 922185 | 5  | 82817833  | 82817833  | C               | T    | SNP   | VCAN            | ENST00000265077 | 1  | silent                      | c.3708                | p.I1236            | tier1 | 739  | 3  | 0.004 | 1063 | 55  | 0.049 |
| 922185 | 5  | 126753323 | 126753323 | C               | T    | SNP   | MEGF10          | ENST00000274473 | 1  | splice_region               | c.1131-7              | e9-7               | tier3 | 47   | 0  | 0.000 | 55   | 24  | 0.304 |
| 922185 | 5  | 137298188 | 137298188 | T               | C    | SNP   | FAM13B          | ENST0000033079  | -1 | intronic                    | c.1180-30             | e9-30              | tier3 | 49   | 1  | 0.020 | 78   | 25  | 0.240 |
| 922185 | 7  | 39990405  | 39990406  | -               | CCGC | INS   | CDK13           | ENST00000181839 | 1  | frame_shift_ins             | c.165_166             | p.L57fs            | tier1 | 27   | 0  | 0.000 | 19   | 7   | 0.269 |
| 922185 | 7  | 55241540  | 55241540  | G               | T    | SNP   | EGFR            | ENST00000275493 | 1  | intronic                    | c.2062-74             | e18-74             | tier3 | 187  | 1  | 0.005 | 211  | 13  | 0.058 |
| 922185 | 9  | 111954473 | 111954473 | A               | T    | SNP   | EPB41L4B        | ENST00000374566 | -1 | intronic                    | c.2301+85             | e22+85             | tier3 | 83   | 0  | 0.000 | 86   | 25  | 0.225 |
| 922185 | 10 | 126678193 | 126678193 | A               | G    | SNP   | CTBP2           | ENST00000309035 | -1 | missense                    | c.2852                | p.I951T            | tier1 | 70   | 0  | 0.000 | 81   | 15  | 0.156 |
| 922185 | 11 | 57970725  | 57970725  | A               | C    | SNP   | OR1S2           | ENST00000302592 | -1 | missense                    | c.929                 | p.M310R            | tier1 | 105  | 3  | 0.028 | 142  | 45  | 0.241 |
| 922185 | 11 | 117340626 | 117340626 | C               | T    | SNP   | DSCAML1         | ENST00000321322 | -1 | silent                      | c.3204                | p.K1068            | tier1 | 134  | 1  | 0.007 | 122  | 41  | 0.252 |
| 922185 | 11 | 134605431 | 134605431 | G               | A    | SNP   | ENSG00000251226 | ENST00000513405 | 1  | 5_prime_flanking_region     | c.-59                 | NULL               | tier2 | 449  | 14 | 0.030 | 333  | 121 | 0.266 |
| 922185 | 12 | 10146243  | 10146243  | A               | C    | SNP   | CLEC1B          | ENST00000298527 | -1 | intronic                    | c.546-357             | e6-357             | tier3 | 45   | 0  | 0.000 | 57   | 16  | 0.219 |
| 922185 | 12 | 50026453  | 50026453  | G               | T    | SNP   | PRPF40B         | ENST00000548436 | 1  | 3_prime_untranslated_region | c.*50026453           | NULL               | tier3 | 710  | 1  | 0.001 | 594  | 169 | 0.221 |
| 922185 | 14 | 21968662  | 21968662  | A               | G    | SNP   | METTL3          | ENST00000298717 | -1 | missense                    | c.1279                | p.F427L            | tier1 | 60   | 1  | 0.016 | 80   | 26  | 0.245 |
| 922185 | 14 | 93704243  | 93704243  | T               | C    | SNP   | BTBD7           | ENST00000334746 | -1 | 3_prime_untranslated_region | c.*4376               | NULL               | tier3 | 50   | 0  | 0.000 | 67   | 22  | 0.247 |
| 922185 | 15 | 34519872  | 34519872  | A               | C    | SNP   | EMC4            | ENST00000561246 | 1  | 3_prime_untranslated_region | c.*34519872           | NULL               | tier3 | 41   | 0  | 0.000 | 45   | 11  | 0.196 |
| 922185 | 15 | 49926994  | 49926994  | A               | -    | DEL   | DTWD1           | ENST00000251250 | 1  | splice_region_del           | c.667+3               | e3+3               | tier3 | 77   | 0  | 0.000 | 145  | 16  | 0.099 |
| 922185 | 15 | 89386622  | 89386622  | C               | T    | SNP   | ACAN            | ENST00000439576 | 1  | missense                    | c.794                 | p.T265I            | tier1 | 86   | 4  | 0.044 | 71   | 27  | 0.276 |
| 922185 | 17 | 15457016  | 15457016  | C               | A    | SNP   | TVP23C          | ENST00000225576 | -1 | missense                    | c.223                 | p.D75Y             | tier1 | 108  | 1  | 0.009 | 170  | 46  | 0.213 |
| 922185 | 17 | 48668000  | 48668000  | G               | A    | SNP   | CACNA1G         | ENST00000359106 | 1  | intronic                    | c.2453+17             | e10+17             | tier3 | 461  | 0  | 0.000 | 578  | 45  | 0.072 |
| 922185 | 18 | 19781636  | 19781636  | A               | T    | SNP   | GATA6           | ENST00000269216 | 1  | 3_prime_untranslated_region | c.*850                | NULL               | tier2 | 144  | 0  | 0.000 | 260  | 70  | 0.212 |
| 922185 | 18 | 21140392  | 21140392  | G               | A    | SNP   | NPC1            | ENST00000269228 | -1 | silent                      | c.684                 | p.D228             | tier1 | 31   | 0  | 0.000 | 54   | 14  | 0.206 |
| 922185 | 22 | 38686807  | 38686808  | -               | T    | INS   | CSNK1E          | ENST00000359867 | -1 | 3_prime_untranslated_region | c.*2486               | NULL               | tier2 | 78   | 0  | 0.000 | 134  | 16  | 0.107 |
| 933226 | 1  | 45798446  | 45798446  | C               | T    | SNP   | MUTYH           | ENST00000450313 | -1 | missense                    | c.565                 | p.G189R            | tier1 | 53   | 0  | 0.000 | 68   | 34  | 0.333 |
| 933226 | 2  | 179532466 | 179532466 | T               | -    | DEL   | TTN             | ENST00000342992 | -1 | intronic                    | c.31483+2479          | e151+2479          | tier2 | 15   | 0  | 0.000 | 76   | 43  | 0.361 |
| 933226 | 2  | 228512849 | 228512849 | G               | A    | SNP   | ENSG00000250599 | ENST00000509872 | -1 | 5_prime_untranslated_region | c.-228512849          | NULL               | tier3 | 64   | 0  | 0.000 | 119  | 53  | 0.308 |
| 933226 | 2  | 241976165 | 241976165 | G               | A    | SNP   | SNED1           | ENST00000310397 | 1  | intronic                    | c.806-42              | e5-42              | tier2 | 14   | 0  | 0.000 | 7    | 8   | 0.533 |
| 933226 | 2  | 242755726 | 242755726 | G               | T    | SNP   | NEU4            | ENST00000325935 | 1  | silent                      | c.84                  | p.R28              | tier1 | 36   | 0  | 0.000 | 36   | 30  | 0.455 |
| 933226 | 3  | 11303055  | 11303055  | C               | T    | SNP   | HRH1            | ENST00000397056 | 1  | 3_prime_untranslated_region | c.*868                | NULL               | tier4 | 40   | 0  | 0.000 | 62   | 50  | 0.446 |
| 933226 | 3  | 142546497 | 142546497 | G               | A    | SNP   | ENSG00000240950 | ENST00000489462 | -1 | 5_prime_untranslated_region | c.-142546497          | NULL               | tier3 | 44   | 0  | 0.000 | 63   | 32  | 0.337 |
| 933226 | 3  | 195512549 | 195512549 | A               | G    | SNP   | MUC4            | ENST00000463781 | -1 | missense                    | c.5902                | p.S1968P           | tier1 | 209  | 0  | 0.000 | 335  | 72  | 0.176 |
| 933226 | 4  | 665776    | 665776    | G               | T    | SNP   | PCGF3           | ENST00000362003 | 1  | 5_prime_flanking_region     | c.-61694              | NULL               | tier3 | 76   | 0  | 0.000 | 70   | 41  | 0.369 |
| 933226 | 4  | 7741871   | 7741871   | C               | T    | SNP   | SORCS2          | ENST00000507866 | 1  | intronic                    | c.3416-56             | e27-56             | tier3 | 20   | 0  | 0.000 | 19   | 19  | 0.500 |
| 933226 | 4  | 55161723  | 55161723  | G               | A    | SNP   | PDGFRA          | ENST00000257290 | 1  | 3_prime_untranslated_region | c.*284                | NULL               | tier3 | 42   | 0  | 0.000 | 125  | 70  | 0.359 |
| 933226 | 4  | 187628190 | 187628190 | T               | A    | SNP   | FAT1            | ENST00000441802 | -1 | missense                    | c.2792                | p.N931I            | tier1 | 37   | 0  | 0.000 | 55   | 37  | 0.402 |
| 933226 | 4  | 189068340 | 189068342 | TGG             | -    | DEL   | TRIML1          | ENST00000332517 | 1  | in_frame_del                | c.1221_1223           | p.G408in_frame_del | tier1 | 65   | 0  | 0.000 | 99   | 52  | 0.344 |
| 933226 | 5  | 1283509   | 1283509   | A               | C    | SNP   | TERT            | ENST00000310581 | -1 | intronic                    | c.1574-770            | e3-770             | tier3 | 904  | 15 | 0.016 | 1313 | 83  | 0.059 |
| 933226 | 5  | 13793657  | 13793657  | A               | G    | SNP   | DNAH5           | ENST00000265104 | -1 | silent                      | c.8191                | p.L273I            | tier1 | 390  | 0  | 0.000 | 514  | 271 | 0.344 |
| 933226 | 5  | 31511227  | 31511227  | C               | T    | SNP   | DROSHA          | ENST00000512076 | -1 | missense                    | c.631                 | p.G211R            | tier1 | 65   | 0  | 0.000 | 101  | 48  | 0.322 |
| 933226 | 5  | 34182770  | 34182770  | C               | T    | SNP   | LOC100653061    | ENST00000514048 | -1 | intronic                    | c.NULL                | NULL               | tier3 | 1352 | 1  | 0.001 | 2412 | 159 | 0.062 |
| 933226 | 5  | 118309302 | 118309319 | GCCTCCTTGCTCGCG | -    | DEL   | DTWD2           | ENST00000510708 | -1 | intronic                    | c.218+14670_218+14653 | e1+14670           | tier2 | 64   | 2  | 0.030 | 43   | 16  | 0.271 |
| 933226 | 6  | 29911836  | 29911836  | GCA             | T    | SNP   | HLA-A           | ENST00000376806 | 1  | intronic                    | c.620-63              | e4-63              | tier2 | 208  | 1  | 0.005 | 312  | 19  | 0.057 |
| 933226 | 6  | 29911844  | 29911844  | T               | A    | SNP   | HLA-A           | ENST00000376806 | 1  | intronic                    | c.620-55              | e4-55              | tier2 | 230  | 1  | 0.004 | 341  | 20  | 0.055 |
| 933226 | 6  | 169623535 | 169623535 | C               | T    | SNP   | THBS2           | ENST00000366787 | -1 | missense                    | c.2809                | p.D937N            | tier1 | 36   | 0  | 0.000 | 80   | 44  | 0.355 |
| 933226 | 7  | 72455428  | 72455428  | C               | G    | SNP   | STAG3L3         | ENST00000436857 | -1 | intronic                    | c.NULL                | NULL               | tier3 | 16   | 0  | 0.000 | 18   | 29  | 0.617 |
| 933226 | 7  | 94157586  | 94157586  | T               | -    | DEL   | CASD1           | ENST00000297273 | 1  | intronic                    | c.459+24              | e5+24              | tier4 | 18   | 0  | 0.000 | 151  | 69  | 0.314 |
| 933226 | 7  | 157652472 | 157652472 | A               | C    | SNP   | PTPRN2          | ENST00000404321 | -1 | intronic                    | c.1857+38893          | e12+38893          | tier3 | 433  | 7  | 0.016 | 742  | 49  | 0.062 |
| 933226 | 7  | 157897557 | 157897557 | T               | C    | SNP</ |                 |                 |    |                             |                       |                    |       |      |    |       |      |     |       |



|        |    |           |           |   |    |     |                        |                 |    |                             |                   |           |       |      |   |       |      |      |       |
|--------|----|-----------|-----------|---|----|-----|------------------------|-----------------|----|-----------------------------|-------------------|-----------|-------|------|---|-------|------|------|-------|
| 933226 | 9  | 68728891  | 68728891  | C | T  | SNP | <i>ENSG00000229789</i> | ENST00000427066 | 1  | 3_prime_untranslated_region | c.*68728891       | NULL      | tier3 | 72   | 1 | 0.014 | 477  | 62   | 0.115 |
| 933226 | 9  | 93976302  | 93976302  | A | G  | SNP | <i>AUH</i>             | ENST00000473695 | -1 | rna                         | NULL              | NULL      | tier1 | 22   | 0 | 0.000 | 152  | 92   | 0.377 |
| 933226 | 10 | 81609037  | 81609037  | G | A  | SNP | <i>NUFM2E</i>          | ENST00000429984 | 1  | intronc                     | c.1735-90         | e6-90     | tier3 | 69   | 0 | 0.000 | 131  | 20   | 0.132 |
| 933226 | 11 | 62037739  | 62037739  | C | T  | SNP | <i>SCGB2A2</i>         | ENST00000227918 | 1  | silent                      | c.51              | p.Y17     | tier1 | 39   | 1 | 0.025 | 37   | 28   | 0.431 |
| 933226 | 11 | 83497858  | 83497858  | A | T  | SNP | <i>DLG2</i>            | ENST00000376104 | -1 | intronc                     | c.1723-23         | e16-23    | tier3 | 53   | 0 | 0.000 | 49   | 33   | 0.402 |
| 933226 | 12 | 59307704  | 59307704  | G | A  | SNP | <i>LRIG3</i>           | ENST00000548968 | -1 | 5_prime_untranslated_region | c.-59307704       | NULL      | tier3 | 37   | 0 | 0.000 | 175  | 91   | 0.342 |
| 933226 | 13 | 37270408  | 37270408  | A | G  | SNP | <i>SERTM1</i>          | ENST00000315190 | 1  | 3_prime_untranslated_region | c.*869            | NULL      | tier3 | 13   | 0 | 0.000 | 96   | 51   | 0.347 |
| 933226 | 13 | 108518148 | 108518148 | T | A  | SNP | <i>FAM155A</i>         | ENST00000375915 | -1 | missense                    | c.797             | p.E266V   | tier1 | 21   | 0 | 0.000 | 40   | 27   | 0.403 |
| 933226 | 14 | 75151331  | 75151331  | A | G  | SNP | <i>AREL1</i>           | ENST00000356357 | -1 | silent                      | c.69              | NULL      | tier1 | 26   | 1 | 0.037 | 53   | 35   | 0.398 |
| 933226 | 14 | 103059220 | 103059220 | G | A  | SNP | <i>RCOR1</i>           | ENST00000262241 | 1  | 5_prime_untranslated_region | c.-4              | NULL      | tier2 | 8    | 0 | 0.000 | 4    | 7    | 0.583 |
| 933226 | 15 | 48056944  | 48056944  | G | A  | SNP | <i>SEMA6D</i>          | ENST00000316364 | 1  | missense                    | c.1207            | p.V403I   | tier1 | 70   | 0 | 0.000 | 97   | 35   | 0.265 |
| 933226 | 16 | 12297268  | 12297268  | A | G  | SNP | <i>SNX29</i>           | ENST00000306030 | 1  | intronc                     | c.523+3728        | e6+3728   | tier3 | 407  | 7 | 0.017 | 740  | 55   | 0.069 |
| 933226 | 16 | 12297294  | 12297294  | T | G  | SNP | <i>SNX29</i>           | ENST00000306030 | 1  | intronc                     | c.523+3754        | e6+3754   | tier3 | 389  | 4 | 0.010 | 709  | 34   | 0.046 |
| 933226 | 16 | 72094682  | 72094682  | A | G  | SNP | <i>HP</i>              | ENST00000355906 | 1  | missense                    | c.1114            | p.T372A   | tier1 | 120  | 0 | 0.000 | 190  | 25   | 0.116 |
| 933226 | 17 | 7578406   | 7578406   | C | T  | SNP | <i>TP53</i>            | ENST00000269305 | -1 | missense                    | c.524             | p.R175H   | tier1 | 1041 | 3 | 0.003 | 407  | 1037 | 0.716 |
| 933226 | 17 | 18638428  | 18638428  | C | A  | SNP | <i>TRIM16L</i>         | ENST00000395902 | 1  | missense                    | c.864             | p.D288E   | tier1 | 35   | 0 | 0.000 | 61   | 37   | 0.378 |
| 933226 | 17 | 19643645  | 19643645  | G | A  | SNP | <i>ALDH3A1</i>         | ENST00000487650 | -1 | 5_prime_untranslated_region | c.-19643645       | NULL      | tier3 | 40   | 0 | 0.000 | 61   | 30   | 0.330 |
| 933226 | 18 | 42531913  | 42531913  | G | A  | SNP | <i>SETBP1</i>          | ENST00000282030 | -1 | missense                    | c.2608            | p.G870S   | tier1 | 532  | 2 | 0.004 | 514  | 310  | 0.376 |
| 933226 | 19 | 1011071   | 1011071   | C | T  | SNP | <i>TMEM259</i>         | ENST00000591128 | -1 | 5_prime_untranslated_region | c.-1011071        | NULL      | tier2 | 72   | 0 | 0.000 | 81   | 31   | 0.277 |
| 933226 | 19 | 1754673   | 1754673   | A | T  | SNP | <i>ONECUT3</i>         | ENST00000382349 | 1  | missense                    | c.1012            | p.S338C   | tier1 | 55   | 0 | 0.000 | 42   | 25   | 0.373 |
| 933226 | 19 | 49316512  | 49316512  | C | T  | SNP | <i>HSD17B14</i>        | ENST00000263278 | -1 | missense                    | c.733             | p.V245M   | tier1 | 51   | 0 | 0.000 | 38   | 25   | 0.397 |
| 933226 | 19 | 51380151  | 51380151  | T | A  | SNP | <i>KLK2</i>            | ENST00000325321 | 1  | missense                    | c.517             | p.C173S   | tier1 | 77   | 0 | 0.000 | 97   | 59   | 0.378 |
| 933226 | 20 | 13269233  | 13269233  | C | T  | SNP | <i>ISM1</i>            | ENST00000262487 | 1  | silent                      | c.690             | p.S230    | tier1 | 68   | 0 | 0.000 | 74   | 40   | 0.351 |
| 933226 | 20 | 60499501  | 60499501  | G | A  | SNP | <i>CDH4</i>            | ENST00000360469 | 1  | missense                    | c.1738            | p.V580I   | tier1 | 54   | 0 | 0.000 | 25   | 24   | 0.490 |
| 933226 | 20 | 62715089  | 62715089  | G | A  | SNP | <i>OPRL1</i>           | ENST00000336866 | 1  | intronc                     | c.1+3384          | e0+3384   | tier2 | 6    | 0 | 0.000 | 1    | 6    | 0.857 |
| 933226 | 21 | 11098586  | 11098586  | G | A  | SNP | <i>BAGE2</i>           | ENST00000470054 | -1 | intronc                     | c.NULL            | NULL      | tier4 | 38   | 0 | 0.000 | 61   | 22   | 0.265 |
| 933226 | 21 | 34923934  | 34923934  | T | C  | SNP | <i>SON</i>             | ENST00000356577 | 1  | silent                      | c.2397            | p.S799    | tier1 | 175  | 4 | 0.022 | 264  | 39   | 0.128 |
| 933226 | 22 | 16414219  | 16414219  | G | A  | SNP | <i>ENSG00000215268</i> | ENST00000417863 | 1  | 3_prime_untranslated_region | c.*16414219       | NULL      | tier3 | 147  | 0 | 0.000 | 221  | 75   | 0.253 |
| 933226 | 22 | 42381976  | 42381976  | G | -  | DEL | <i>O3.Sep</i>          | ENST00000460267 | 1  | 3_prime_untranslated_region | c.*42381976       | NULL      | tier3 | 24   | 0 | 0.000 | 43   | 24   | 0.358 |
| 933226 | X  | 5821695   | 5821695   | G | A  | SNP | <i>NLGN4X</i>          | ENST00000381093 | -1 | missense                    | c.1084            | p.P362S   | tier1 | 48   | 0 | 0.000 | 14   | 72   | 0.837 |
| 933226 | X  | 43626915  | 43626915  | C | G  | SNP | <i>MAOB</i>            | ENST00000378069 | -1 | intronc                     | c.1411-50         | e15-50    | tier4 | 38   | 0 | 0.000 | 34   | 78   | 0.696 |
| 933226 | X  | 101624781 | 101624781 | C | T  | SNP | <i>NXF2B</i>           | ENST00000372752 | -1 | 5_prime_untranslated_region | c.-155            | NULL      | tier3 | 132  | 0 | 0.000 | 239  | 147  | 0.380 |
| 933226 | X  | 130423302 | 130423302 | C | A  | SNP | <i>IGSF1</i>           | ENST00000370903 | -1 | 5_prime_untranslated_region | c.-2654           | NULL      | tier3 | 21   | 0 | 0.000 | 13   | 54   | 0.806 |
| 944541 | 1  | 50552429  | 50552429  | G | A  | SNP | <i>ELAVL4</i>          | ENST00000448907 | -1 | intronc                     | c.18+38575        | e1+38575  | tier3 | 50   | 1 | 0.020 | 128  | 61   | 0.321 |
| 944541 | 2  | 43453288  | 43453288  | G | A  | SNP | <i>THADA</i>           | ENST00000330266 | -1 | intronc                     | c.3189-59383      | e20-59383 | tier2 | 60   | 1 | 0.016 | 170  | 108  | 0.386 |
| 944541 | 2  | 97483175  | 97483175  | C | G  | SNP | <i>CNNM3</i>           | ENST00000305510 | 1  | missense                    | c.1161            | p.N387K   | tier1 | 22   | 0 | 0.000 | 29   | 30   | 0.509 |
| 944541 | 3  | 130145131 | 130145131 | G | T  | SNP | <i>COL6A5</i>          | ENST00000265379 | 1  | intronc                     | c.5199+38         | e29+38    | tier3 | 30   | 0 | 0.000 | 62   | 40   | 0.392 |
| 944541 | 3  | 195690360 | 195690360 | G | A  | SNP | <i>SDHAP1</i>          | ENST00000354559 | -1 | intronc                     | c.NULL            | NULL      | tier3 | 32   | 0 | 0.000 | 167  | 46   | 0.214 |
| 944541 | 4  | 44638032  | 44638032  | C | T  | SNP | <i>YIPF7</i>           | ENST00000332990 | -1 | missense                    | c.259             | p.A87T    | tier1 | 35   | 0 | 0.000 | 69   | 38   | 0.355 |
| 944541 | 5  | 140482151 | 140482151 | C | T  | SNP | <i>PCDHB3</i>          | ENST00000231130 | 1  | silent                      | c.1918            | p.L640    | tier1 | 223  | 2 | 0.009 | 467  | 308  | 0.397 |
| 944541 | 6  | 33144473  | 33144473  | G | C  | SNP | <i>COL11A2</i>         | ENST00000341947 | -1 | intronc                     | c.2115+25         | e26+25    | tier3 | 49   | 0 | 0.000 | 113  | 66   | 0.369 |
| 944541 | 6  | 43127615  | 43127615  | A | G  | SNP | <i>PTK7</i>            | ENST00000230419 | 1  | missense                    | c.2963            | p.D988G   | tier1 | 41   | 0 | 0.000 | 79   | 40   | 0.336 |
| 944541 | 7  | 142242469 | 142242469 | G | T  | SNP | <i>TRBV5-3</i>         | ENST00000390362 | -1 | missense                    | c.155             | p.S52Y    | tier1 | 90   | 1 | 0.011 | 189  | 24   | 0.113 |
| 944541 | 8  | 3253958   | 3253958   | C | T  | SNP | <i>CSMD1</i>           | ENST00000520002 | -1 | intronc                     | c.2409-55         | e18-55    | tier3 | 142  | 3 | 0.021 | 356  | 163  | 0.314 |
| 944541 | 8  | 21824261  | 21824261  | A | G  | SNP | <i>XPO7</i>            | ENST00000434536 | 1  | intronc                     | c.19-107          | e2-107    | tier3 | 30   | 0 | 0.000 | 132  | 94   | 0.416 |
| 944541 | 8  | 102504720 | 102504720 | C | G  | SNP | <i>LOC101927172</i>    | ENST00000520268 | -1 | rna                         | NULL              | NULL      | tier1 | 83   | 0 | 0.000 | 169  | 108  | 0.390 |
| 944541 | 9  | 27268422  | 27268422  | G | C  | SNP | <i>LINC00032</i>       | ENST00000425633 | -1 | rna                         | NULL              | NULL      | tier1 | 13   | 0 | 0.000 | 31   | 23   | 0.426 |
| 944541 | 9  | 139903352 | 139903352 | - | C  | INS | <i>ABCA2</i>           | ENST00000265662 | -1 | intronc                     | c.6931-33_6931-32 | e47-32    | tier3 | 19   | 1 | 0.050 | 45   | 32   | 0.416 |
| 944541 | 11 | 32414262  | 32414262  | C | G  | SNP | <i>WT1</i>             | ENST00000332351 | -1 | missense                    | c.1289            | p.R430P   | tier1 | 215  | 0 | 0.000 | 743  | 71   | 0.087 |
| 944541 | 11 | 32417909  | 32417910  | - | GA | INS | <i>WT1</i>             | ENST00000332351 | -1 | frame_shift_ins             | c.1143_1142       | p.A382fs  | tier1 | 330  | 0 | 0.000 | 751  | 305  | 0.289 |
| 944541 | 11 | 32417914  | 32417915  | - | T  | INS | <i>WT1</i>             | ENST00000332351 | -1 | frame_shift_ins             | c.1138_1137       | p.R379fs  | tier1 | 322  | 0 | 0.000 | 925  | 106  | 0.103 |
| 944541 | 12 | 6697549   | 6697549   | C | T  | SNP | <i>CHD4</i>            | ENST00000309577 | -1 | missense                    | c.3380            | p.R1127Q  | tier1 | 358  | 0 | 0.000 | 1112 | 95   | 0.079 |
| 944541 | 12 | 96330312  | 96330312  | A | -  | DEL | <i>CCDC38</i>          | ENST00000344280 | -1 | intronc                     | c.1-11            | e1-11     | tier3 | 7    | 0 | 0.000 | 21   | 29   | 0.580 |
| 944541 | 12 | 112888189 | 112888189 | G | A  | SNP | <i>PTPN11</i>          | ENST00000351677 | 1  | missense                    | c.205             | p.E69K    | tier1 | 204  | 3 | 0.015 | 535  | 381  | 0.416 |
| 944541 | 13 | 33017732  | 33017732  | C | T  | SNP | <i>N4BP2L2</i>         | ENST00000399396 | -1 | silent                      | c.942             | p.A314    | tier1 | 17   | 0 | 0.000 | 51   | 28   | 0.354 |
| 944541 | 13 | 50115190  | 50115190  | C | T  | SNP | <i>RCBTB1</i>          | ENST00000258646 | -1 | intronc                     | c.1325-48         | e10-48    | tier3 | 13   | 0 | 0.000 | 29   | 31   | 0.517 |
| 944541 | 15 | 52427942  | 52427942  | C | A  | SNP | <i>GNB5</i>            | ENST00000261837 | -1 | silent                      | c.639             | p.A213    | tier1 | 9    | 0 | 0.000 | 15   | 16   | 0.516 |
| 944541 | 15 | 89386618  | 89386618  | T | A  | SNP | <i>ACAN</i>            | ENST00000439576 | 1  | missense                    | c.790             | p.F264I   | tier1 | 33   | 0 | 0.000 | 79   | 44   | 0.358 |
| 944541 | 16 | 11541929  | 11541929  | G | A  | SNP | <i>LOC101929274</i>    | ENST00000344649 | -1 | missense                    | c.1222            | p.P408S   | tier1 | 61   | 0 | 0.000 | 85   | 85   | 0.500 |
| 944541 | 17 | 40322106  | 40322106  | G | A  | SNP | <i>KCNH4</i>           | ENST00000264661 | -1 | intronc                     | c.1390+19         | e8+19     | tier3 | 31   | 0 | 0.000 | 79   | 42   | 0.342 |
| 944541 | 17 | 42635299  | 42635299  | G | A  | SNP | <i>FZD2</i>            | ENST00000315323 | 1  | silent                      | c.243             | p.K81     | tier1 | 34   | 0 | 0.000 | 51   | 27   | 0.346 |
| 944541 | 18 | 43684347  | 43684347  | A | C  | SNP | <i>HAUS1</i>           | ENST00000282058 | 1  | 5_prime_untranslated_region | c.-31             | NULL      | tier2 | 208  | 0 | 0.000 | 533  | 369  | 0.409 |
| 944541 | 19 | 7964800   | 7964800   | C | T  | SNP | <i>LRRC8E</i>          | ENST00000306708 | 1  | missense                    | c.1393            | p.L465F   | tier1 | 30   | 0 | 0.000 | 64   | 33   | 0.340 |
| 944541 | 19 | 10812636  | 10812636  | T | C  | SNP | <i>QTRT1</i>           | ENST00000250237 | 1  | missense                    | c.254             | p.L85P    | tier1 | 45   | 0 | 0.000 | 77   | 36   | 0.316 |
| 944541 | 20 | 56847816  | 56847816  | T | C  | SNP | <i>PPP4R1L</i>         | ENST00000334187 | -1 | splice_region               | c.292+9           | e4+9      | tier3 | 8    | 0 | 0.000 | 36   | 53   | 0.596 |
| 944541 | 22 | 20710847  | 20710847  | C | T  | SNP | <i>FAM230A</i>         | ENST00000434783 | 1  | missense                    | c.2579            | p.A860V   | tier1 | 142  | 0 | 0.000 | 497  | 29   | 0.055 |
| 944541 | 22 | 22842205  | 22842205  | G | C  | SNP | <i>ZNF280B</i>         | ENST00000360412 | -1 | missense                    | c.1519            | p.L507V   | tier1 | 45   | 0 | 0.000 | 126  |      |       |

|        |    |           |           |    |    |     |                 |                 |                 |                             |                        |                       |         |       |     |       |       |     |       |       |
|--------|----|-----------|-----------|----|----|-----|-----------------|-----------------|-----------------|-----------------------------|------------------------|-----------------------|---------|-------|-----|-------|-------|-----|-------|-------|
| 955252 | 5  | 140563408 | 140563408 | A  | G  | SNP | PCDHB16         | ENST00000361016 | 1               | missense                    | c.1274                 | p.D425G               | tier1   | 235   | 1   | 0.004 | 485   | 24  | 0.047 |       |
| 955252 | 7  | 157652095 | 157652096 | -  | CA | INS | PTPRN2          | ENST00000404321 | -1              | intronic                    | c.1857+39269-1857+3926 | e12+39269             | tier3   | 133   | 2   | 0.015 | 148   | 17  | 0.103 |       |
| 955252 | 9  | 139342941 | 139342941 | T  | G  | SNP | SEC16A          | ENST00000313084 | -1              | missense                    | c.91                   | p.T31P                | tier1   | 69    | 0   | 0.000 | 133   | 18  | 0.115 |       |
| 955252 | 11 | 67432799  | 67432799  | G  | A  | SNP | ALDH3B2         | ENST00000349015 | -1              | silent                      | c.663                  | p.R221                | tier1   | 240   | 0   | 0.000 | 370   | 16  | 0.041 |       |
| 955252 | 12 | 30790136  | 30790137  | -  | A  | INS | IPO8            | ENST00000256079 | -1              | intronic                    | c.2490-16_2490-15      | e22-15                | tier3   | 18    | 0   | 0.000 | 49    | 25  | 0.338 |       |
| 955252 | 20 | 29628205  | 29628205  | T  | A  | SNP | FRG1B           | ENST00000278882 | 1               | intronic                    | c.229-22               | e4-22                 | tier3   | 469   | 7   | 0.015 | 1948  | 99  | 0.048 |       |
| 955252 | 20 | 29628229  | 29628229  | G  | T  | SNP | FRG1B           | ENST00000479318 | 1               | nonsense                    | c.115                  | p.E39*                | tier1   | 534   | 8   | 0.015 | 2248  | 106 | 0.045 |       |
| 955252 | 22 | 20402385  | 20402386  | GC | -  | DEL | PI4KAP1         | ENST00000416922 | -1              | rna                         | NULL                   | NULL                  | tier1   | 17    | 0   | 0.000 | 12    | 9   | 0.429 |       |
| 955252 | 22 | 34019122  | 34019122  | T  | -  | DEL | LARGE           | ENST00000354992 | -1              | intronic                    | c.491+3106             | e3+3106               | tier3   | 108   | 1   | 0.009 | 284   | 32  | 0.101 |       |
| 988638 | 1  | 46505876  | 46505876  | G  | A  | SNP | PIK3R3          | ENST00000262741 | -1              | 3_prime_untranslated_region | c.*3469                | NULL                  | tier3   | 182   | 0   | 0.000 | 193   | 34  | 0.150 |       |
| 988638 | 1  | 161519606 | 161519606 | A  | G  | SNP | FCGR3A          | ENST00000367969 | -1              | missense                    | c.29                   | p.F10S                | tier1   | 128   | 0   | 0.000 | 123   | 26  | 0.173 |       |
| 988638 | 1  | 231956089 | 231956090 | -  | -  | T   | INS             | DISC1           | ENST00000439617 | 1                           | intronic               | c.1981+1826_1981+1825 | e9+1826 | tier3 | 122 | 0     | 0.000 | 186 | 20    | 0.097 |
| 988638 | 1  | 233091444 | 233091444 | G  | A  | SNP | NTPCR           | ENST00000366628 | 1               | missense                    | c.176                  | p.R59Q                | tier1   | 124   | 0   | 0.000 | 163   | 41  | 0.200 |       |
| 988638 | 2  | 102484410 | 102484410 | C  | T  | SNP | MAP4K4          | ENST00000498066 | 1               | rna                         | NULL                   | NULL                  | tier1   | 104   | 0   | 0.000 | 86    | 10  | 0.104 |       |
| 988638 | 2  | 128387436 | 128387436 | A  | G  | SNP | MYO7B           | ENST00000389524 | 1               | intronic                    | c.4728+35              | e33+35                | tier3   | 108   | 0   | 0.000 | 108   | 15  | 0.122 |       |
| 988638 | 2  | 135957920 | 135957920 | T  | C  | SNP | ZRANB3          | ENST00000264159 | -1              | missense                    | c.3232                 | p.K1078E              | tier1   | 94    | 0   | 0.000 | 116   | 34  | 0.227 |       |
| 988638 | 2  | 175689250 | 175689250 | A  | -  | DEL | CHN1            | ENST00000409900 | -1              | splice_region_del           | c.628-4                | e8-4                  | tier3   | 44    | 0   | 0.000 | 58    | 11  | 0.159 |       |
| 988638 | 2  | 192257750 | 192257750 | G  | C  | SNP | MYO1B           | ENST00000304164 | 1               | intronic                    | c.2077-49              | e19-49                | tier3   | 84    | 0   | 0.000 | 112   | 15  | 0.118 |       |
| 988638 | 2  | 202467998 | 202467998 | C  | A  | SNP | ALS2CR11        | ENST00000286195 | -1              | missense                    | c.319                  | p.V107F               | tier1   | 76    | 0   | 0.000 | 128   | 39  | 0.234 |       |
| 988638 | 3  | 32997048  | 32997048  | T  | A  | SNP | CCR4            | ENST00000330953 | 1               | 3_prime_untranslated_region | c.*1051                | NULL                  | tier3   | 146   | 3   | 0.020 | 242   | 29  | 0.107 |       |
| 988638 | 3  | 55061774  | 55061774  | C  | T  | SNP | CACNA2D3        | ENST00000288197 | 1               | intronic                    | c.2987+9430            | e35+9430              | tier2   | 91    | 0   | 0.000 | 101   | 21  | 0.172 |       |
| 988638 | 6  | 55990914  | 55990914  | G  | T  | SNP | COL21A1         | ENST00000244728 | -1              | missense                    | c.1576                 | p.H526N               | tier1   | 96    | 0   | 0.000 | 154   | 56  | 0.265 |       |
| 988638 | 7  | 20826548  | 20826548  | G  | T  | SNP | SP8             | ENST00000418710 | -1              | 5_prime_flanking_region     | c.-131                 | NULL                  | tier2   | 110   | 0   | 0.000 | 91    | 17  | 0.157 |       |
| 988638 | 7  | 74225436  | 74225436  | T  | C  | SNP | GTF2IRD2        | ENST00000405086 | -1              | missense                    | c.799                  | p.M267V               | tier1   | 142   | 2   | 0.014 | 177   | 118 | 0.400 |       |
| 988638 | 8  | 94937549  | 94937550  | -  | T  | INS | PDP1            | ENST00000396200 | 1               | 3_prime_untranslated_region | c.*1648                | NULL                  | tier4   | 27    | 0   | 0.000 | 55    | 17  | 0.236 |       |
| 988638 | 9  | 44874097  | 44874097  | G  | A  | SNP | ENSG00000231454 | ENST00000450729 | 1               | 3_prime_untranslated_region | c.*44874097            | NULL                  | tier3   | 190   | 1   | 0.005 | 224   | 27  | 0.108 |       |
| 988638 | 9  | 128083745 | 128083745 | G  | T  | SNP | GAPVD1          | ENST00000394105 | 1               | nonsense                    | c.1636                 | p.G546*               | tier1   | 76    | 0   | 0.000 | 162   | 34  | 0.174 |       |
| 988638 | 10 | 51829388  | 51829388  | C  | T  | SNP | FAM21A          | ENST00000282633 | 1               | missense                    | c.208                  | p.R70W                | tier1   | 196   | 0   | 0.000 | 234   | 46  | 0.164 |       |
| 988638 | 11 | 5842368   | 5842368   | G  | C  | SNP | OR52N2          | ENST00000317037 | 1               | missense                    | c.803                  | p.G268A               | tier1   | 84    | 0   | 0.000 | 130   | 26  | 0.166 |       |
| 988638 | 11 | 89531801  | 89531801  | C  | A  | SNP | TRIM49          | ENST00000329758 | -1              | splice_region               | c.860-4                | e6-4                  | tier3   | 57    | 0   | 0.000 | 140   | 29  | 0.171 |       |
| 988638 | 12 | 40815079  | 40815079  | G  | A  | SNP | MUC19           | ENST00000471230 | 1               | rna                         | NULL                   | NULL                  | tier1   | 115   | 0   | 0.000 | 296   | 55  | 0.157 |       |
| 988638 | 16 | 89650436  | 89650436  | G  | A  | SNP | CPNE7           | ENST00000268720 | 1               | missense                    | c.658                  | p.V220M               | tier1   | 96    | 1   | 0.010 | 95    | 21  | 0.181 |       |
| 988638 | 17 | 44074056  | 44074056  | G  | T  | SNP | MAPT            | ENST00000344290 | 1               | intronic                    | c.1827+26              | e10+26                | tier3   | 70    | 0   | 0.000 | 41    | 18  | 0.305 |       |
| 988638 | 17 | 74732959  | 74732959  | G  | T  | SNP | SRSF2           | ENST00000359995 | -1              | missense                    | c.284                  | p.P95H                | tier1   | 392   | 1   | 0.003 | 397   | 70  | 0.150 |       |
| 988638 | 18 | 42531907  | 42531907  | G  | A  | SNP | SETBP1          | ENST00000282030 | 1               | missense                    | c.2602                 | p.D868N               | tier1   | 576   | 0   | 0.000 | 629   | 106 | 0.144 |       |
| 988638 | 19 | 7675544   | 7675544   | G  | C  | SNP | CAMSAP3         | ENST00000446248 | 1               | intronic                    | c.982-42               | e9-42                 | tier3   | 102   | 2   | 0.019 | 88    | 20  | 0.184 |       |
| 988638 | 19 | 10561262  | 10561262  | T  | -  | DEL | PDE4A           | ENST00000352831 | 1               | intronic                    | c.621-17               | e5-17                 | tier3   | 73    | 0   | 0.000 | 86    | 13  | 0.131 |       |
| 988638 | 19 | 35265460  | 35265460  | C  | T  | SNP | ZNF599          | ENST00000329285 | -1              | 5_prime_flanking_region     | c.-1714                | NULL                  | tier4   | 47    | 0   | 0.000 | 53    | 10  | 0.159 |       |
| 988638 | 20 | 31022441  | 31022442  | -  | G  | INS | ASXL1           | ENST00000375687 | 1               | frame_shift_ins             | c.1926_1927            | p.G645fs              | tier1   | 805   | 6   | 0.007 | 781   | 132 | 0.145 |       |
| 988638 | 20 | 44815531  | 44815531  | G  | A  | SNP | CDH22           | ENST00000372262 | -1              | silent                      | c.1479                 | p.N493                | tier1   | 88    | 0   | 0.000 | 92    | 18  | 0.164 |       |
| 988638 | X  | 14338161  | 14338161  | C  | T  | SNP | -               | -               | -               | -                           | -                      | -                     | tier3   | 42    | 0   | 0.000 | 48    | 25  | 0.343 |       |
| 988638 | X  | 73071846  | 73071846  | A  | -  | DEL | XIST            | ENST00000429829 | -1              | rna                         | NULL                   | NULL                  | tier1   | 80    | 1   | 0.012 | 97    | 16  | 0.142 |       |
| 991140 | 1  | 142653596 | 142653596 | C  | T  | SNP | ENSG00000266657 | ENST00000580249 | 1               | rna                         | NULL                   | NULL                  | tier1   | 211   | 0   | 0.000 | 423   | 50  | 0.106 |       |
| 991140 | 1  | 152279155 | 152279155 | C  | -  | DEL | FLG             | ENST00000368799 | -1              | frame_shift_del             | c.8207                 | p.G2736fs             | tier1   | 374   | 0   | 0.000 | 691   | 94  | 0.120 |       |
| 991140 | 1  | 181702771 | 181702771 | C  | T  | SNP | CACNA1E         | ENST00000367573 | 1               | silent                      | c.3147                 | p.S1049               | tier1   | 268   | 0   | 0.000 | 491   | 126 | 0.204 |       |
| 991140 | 1  | 223938499 | 223938499 | C  | T  | SNP | CAPN2           | ENST00000295006 | 1               | intronic                    | c.814-93               | e7-93                 | tier3   | 40    | 0   | 0.000 | 92    | 22  | 0.193 |       |
| 991140 | 1  | 235926068 | 235926068 | C  | T  | SNP | LYST            | ENST00000389793 | -1              | missense                    | c.6205                 | p.G2069R              | tier1   | 51    | 0   | 0.000 | 132   | 64  | 0.327 |       |
| 991140 | 2  | 97833261  | 97833261  | T  | A  | SNP | ANKRD36         | ENST00000420699 | 1               | intronic                    | c.1532-53              | e1-53                 | tier3   | 186   | 4   | 0.021 | 666   | 63  | 0.086 |       |
| 991140 | 2  | 166187904 | 166187904 | T  | C  | SNP | SCN2A           | ENST00000283256 | 1               | silent                      | c.2214                 | p.I738                | tier1   | 217   | 1   | 0.005 | 503   | 146 | 0.224 |       |
| 991140 | 2  | 189997806 | 189997806 | G  | A  | SNP | MIR3129         | ENST00000581095 | -1              | rna                         | NULL                   | NULL                  | tier1   | 55    | 1   | 0.018 | 106   | 37  | 0.259 |       |
| 991140 | 3  | 116163747 | 116163747 | C  | T  | SNP | LSAMP           | ENST00000490035 | -1              | silent                      | c.132                  | p.R44                 | tier1   | 67    | 0   | 0.000 | 89    | 43  | 0.326 |       |
| 991140 | 3  | 132201248 | 132201248 | C  | T  | SNP | DNAJC13         | ENST00000260818 | 1               | intronic                    | c.2979+74              | e26+74                | tier3   | 62    | 2   | 0.031 | 105   | 44  | 0.295 |       |
| 991140 | 4  | 16503736  | 16503737  | -  | A  | INS | LDB2            | ENST00000509803 | -1              | 5_prime_untranslated_region | c.-16503736            | NULL                  | tier3   | 66    | 0   | 0.000 | 121   | 18  | 0.130 |       |
| 991140 | 4  | 36093672  | 36093672  | T  | A  | SNP | ARAP2           | ENST00000303965 | -1              | intronic                    | c.4286-30              | e27-30                | tier3   | 170   | 1   | 0.006 | 474   | 120 | 0.202 |       |
| 991140 | 6  | 147006987 | 147006987 | C  | G  | SNP | ADGB            | ENST00000397944 | 1               | intronic                    | c.1311+23              | e10+23                | tier3   | 39    | 0   | 0.000 | 158   | 30  | 0.159 |       |
| 991140 | 7  | 34889221  | 34889221  | C  | A  | SNP | NPSR1           | ENST00000381539 | 1               | missense                    | c.1170                 | p.N390K               | tier1   | 47    | 0   | 0.000 | 49    | 30  | 0.380 |       |
| 991140 | 8  | 97506480  | 97506480  | G  | A  | SNP | SDC2            | ENST00000520233 | 1               | rna                         | NULL                   | NULL                  | tier1   | 142   | 0   | 0.000 | 367   | 132 | 0.265 |       |
| 991140 | 8  | 142166004 | 142166004 | G  | T  | SNP | DENND3          | ENST00000262585 | 1               | missense                    | c.891                  | p.K297N               | tier1   | 131   | 0   | 0.000 | 216   | 73  | 0.253 |       |
| 991140 | 8  | 142517302 | 142517302 | G  | C  | SNP | MROH5           | ENST00000521053 | -1              | 5_prime_untranslated_region | c.-53                  | NULL                  | tier3   | 273   | 1   | 0.004 | 459   | 155 | 0.251 |       |
| 991140 | 9  | 133254693 | 133254693 | G  | A  | SNP | HMCN2           | ENST00000480829 | 1               | 5_prime_flanking_region     | c.-19336               | NULL                  | tier3   | 56    | 0   | 0.000 | 109   | 31  | 0.220 |       |
| 991140 | 9  | 135521201 | 135521201 | C  | A  | SNP | DDX31           | ENST00000372159 | -1              | intronic                    | c.1695+81              | e13+81                | tier3   | 42    | 0   | 0.000 | 61    | 26  | 0.299 |       |
| 991140 | 11 | 19735518  | 19735518  | G  | A  | SNP | NAV2            | ENST00000396087 | 1               | splice_region               | c.267+10               | e1+10                 | tier2   | 35    | 0   | 0.000 | 53    | 13  | 0.197 |       |
| 991140 | 11 | 30034426  | 30034426  | A  | G  | SNP | KCNA4           | ENST00000328224 | -1              | 5_prime_untranslated_region | c.-201                 | NULL                  | tier3   | 123   | 0   | 0.000 | 195   | 71  | 0.266 |       |
| 991140 | 12 | 15749242  | 15749242  | C  | T  | SNP | PTPRO           | ENST00000544706 | 1               | rna                         | NULL                   | NULL                  | tier1   | 138   | 0   | 0.000 | 149   | 71  | 0.323 |       |
| 991140 | 12 | 31297989  | 31297989  | C  | T  | SNP | LOC100509445    | ENST00000398963 | -1              | splice_site                 | c.NULL                 | NULL                  | tier1   | 294   | 0   | 0.000 | 743   | 27  | 0.035 |       |
| 991140 | 12 | 48378352  | 48378352  | G  | A  | SNP | COL2A1          | ENST00000380518 | -1              | silent                      | c.1864                 | p.L622                | tier1   | 38    | 0   | 0.000 | 63    | 22  | 0.259 |       |
| 991140 | 15 | 45059668  | 45059668  | C  | T  | SNP | TRIM69          | ENST00000329464 | 1               | missense                    | c.1201                 | p.R401W               | tier1   | 72    | 0   | 0.000 | 126   | 49  | 0.280 |       |
| 991140 | 16 | 21974018  | 21974018  | G  | A  | SNP | UQCRC2          | ENST00000563711 | 1               | 3_prime_untranslated_region | c.*21974018            | NULL                  | tier3   | 75    | 0   | 0.000 | 170   | 64  | 0.274 |       |
| 991140 | 16 | 70923652  | 70923652  | G  | A  | SNP | HYDIN           | ENST00000393    |                 |                             |                        |                       |         |       |     |       |       |     |       |       |

|        |    |          |          |   |   |     |        |                 |    |          |          |         |       |     |   |       |     |     |       |
|--------|----|----------|----------|---|---|-----|--------|-----------------|----|----------|----------|---------|-------|-----|---|-------|-----|-----|-------|
| 991140 | 19 | 44680481 | 44680481 | G | T | SNP | ZNF226 | ENST00000337433 | 1  | missense | c.1066   | p.V356F | tier1 | 76  | 2 | 0.026 | 153 | 46  | 0.231 |
| 991140 | 19 | 54395724 | 54395724 | A | G | SNP | PRKCG  | ENST00000540413 | 1  | intronic | c.687-39 | e7-39   | tier3 | 102 | 1 | 0.010 | 213 | 62  | 0.224 |
| 991140 | 20 | 57464246 | 57464246 | C | A | SNP | GNAS   | ENST00000464788 | 1  | rna      | NULL     | NULL    | tier1 | 20  | 0 | 0.000 | 31  | 12  | 0.279 |
| 991140 | 21 | 41550865 | 41550865 | G | A | SNP | DSCAM  | ENST00000400454 | -1 | missense | c.2936   | p.A979V | tier1 | 469 | 0 | 0.000 | 876 | 283 | 0.244 |

All genome coordinates use NCBI Build 37.

UPN, unique patient number.

Chr, chromosome; Var, variant; Ref, reference; VAF, variant allele frequency, listed as a fraction.

The VAF calculation includes non-supporting reads.

Tier, defined in Walter et. al., NEJM. 2012 Mar 22;366(12):1090-8.



Table S4. Validated Somatic Mutations by Ultra-Deep Error-Corrected Sequencing

| UPN    | Chr | Start     | Stop      | Reference | Variant | Gene Symbol         | Mutation Type               | Coding Position | Amino Acid Change | Tier  | Normal Total Count | Normal Unique Count* | Normal Ref Count | Normal Var Count | Normal VAF | Initial Total Count | Initial Unique Count* | Initial Ref Count | Initial Var Count | Initial VAF | Pre Total Count | Pre Unique Count* | Pre Ref Count | Pre Var Count | Pre VAF | D30 Total Count | D30 Unique Count | D30 Ref Count | D30 Var Count | D30 VAF | D100 Total Count | D100 Unique Count* | D100 Ref Count | D100 Var Count | D100 VAF |
|--------|-----|-----------|-----------|-----------|---------|---------------------|-----------------------------|-----------------|-------------------|-------|--------------------|----------------------|------------------|------------------|------------|---------------------|-----------------------|-------------------|-------------------|-------------|-----------------|-------------------|---------------|---------------|---------|-----------------|------------------|---------------|---------------|---------|------------------|--------------------|----------------|----------------|----------|
| 611    | 1   | 53547545  | 53547545  | C         | T       | <i>PODN</i>         | intronic                    | c.1806-108      | e10-108           | tier3 | 8982               | 895                  | 887              | 5                | 0.006      | 23761               | 3272                  | 2325              | 923               | 0.284       | 21120           | 2119              | 1473          | 622           | 0.297   | 35709           | 4411             | 4405          | 4             | 0.000   | 25601            | 3509               | 3504           | 0              | 0.000    |
| 611    | 2   | 25464481  | 25464481  | G         | A       | <i>DNMT3A</i>       | nonsense                    | c.2032          | p.Q678*           | tier1 | 2028               | 226                  | 225              | 1                | 0.004      | 4329                | 790                   | 747               | 41                | 0.052       | 4130            | 517               | 491           | 24            | 0.047   | 3049            | 490              | 487           | 3             | 0.006   | 3039             | 452                | 451            | 0              | 0.000    |
| 611    | 3   | 31495819  | 31495819  | G         | A       | <i>THRAP3P1</i>     | 3_prime_untranslated_region | c.*31495819     | NULL              | tier3 | 3035               | 365                  | 365              | 0                | 0.000      | 3102                | 654                   | 500               | 152               | 0.233       | 1732            | 188               | 138           | 50            | 0.266   | 4527            | 844              | 842           | 1             | 0.000   | 4125             | 0                  | 0              | 0              | NA       |
| 611    | 3   | 64644370  | 64644370  | G         | A       | <i>ADAMTS9</i>      | silent                      | c.777           | p.S259            | tier1 | 3123               | 364                  | 363              | 0                | 0.000      | 3968                | 649                   | 567               | 77                | 0.120       | 6484            | 898               | 790           | 107           | 0.119   | 8990            | 1366             | 1364          | 0             | 0.000   | 7793             | 1287               | 1285           | 1              | 0.000    |
| 611    | 3   | 130720537 | 130720537 | T         | A       | <i>ATP2C1</i>       | 3_prime_untranslated_region | c.*343          | NULL              | tier4 | 288                | 17                   | 17               | 0                | 0.000      | 425                 | 69                    | 45                | 24                | 0.348       | 254             | 17                | 10            | 7             | 0.412   | 756             | 94               | 93            | 0             | 0.000   | 530              | 78                 | 77             | 0              | 0.000    |
| 611    | 4   | 187540539 | 187540539 | C         | T       | <i>FAT1</i>         | missense                    | c.7201          | p.E2401K          | tier1 | 21282              | 2384                 | 2364             | 9                | 0.004      | 32719               | 4299                  | 2970              | 1289              | 0.303       | 24310           | 2850              | 2007          | 820           | 0.290   | 52691           | 6679             | 6675          | 1             | 0.000   | 33041            | 4166               | 4160           | 1              | 0.000    |
| 611    | 6   | 33037020  | 33037020  | G         | A       | <i>HLA-DPA1</i>     | missense                    | c.404           | p.T135I           | tier1 | 2634               | 286                  | 282              | 1                | 0.004      | 18565               | 2550                  | 1805              | 734               | 0.289       | 13574           | 1591              | 1098          | 483           | 0.306   | 31106           | 3993             | 3991          | 0             | 0.000   | 21027            | 2758               | 2753           | 0              | 0.000    |
| 611    | 6   | 43206066  | 43206066  | C         | G       | <i>TBKI</i>         | 5_prime_flanking_region     | c.-8333         | NULL              | tier4 | 5847               | 541                  | 536              | 3                | 0.006      | 15507               | 2392                  | 1662              | 697               | 0.295       | 16426           | 1814              | 1285          | 520           | 0.288   | 19550           | 2486             | 2476          | 0             | 0.000   | 13342            | 1837               | 1821           | 0              | 0.000    |
| 611    | 7   | 45753309  | 45753309  | C         | T       | <i>ADCY1</i>        | silent                      | c.3075          | p.H102S           | tier1 | 21752              | 2553                 | 2548             | 0                | 0.000      | 9088                | 1296                  | 1201              | 91                | 0.070       | 7784            | 909               | 870           | 38            | 0.042   | 31696           | 4296             | 4293          | 0             | 0.000   | 19415            | 2938               | 2929           | 0              | 0.000    |
| 611    | 7   | 100549883 | 100549883 | G         | A       | <i>LOC100131514</i> | missense                    | c.464           | p.S155N           | tier1 | 12274              | 1185                 | 1181             | 2                | 0.002      | 14429               | 1813                  | 1189              | 602               | 0.336       | 14811           | 1654              | 1141          | 505           | 0.307   | 28000           | 3067             | 3062          | 0             | 0.000   | 20095            | 2213               | 2207           | 0              | 0.000    |
| 611    | 8   | 17944578  | 17944578  | C         | T       | <i>LOC101929066</i> | rna                         | NULL            | NULL              | tier1 | 2684               | 191                  | 190              | 1                | 0.005      | 4051                | 574                   | 409               | 161               | 0.282       | 5753            | 548               | 386           | 158           | 0.290   | 6560            | 884              | 877           | 1             | 0.000   | 4619             | 670                | 665            | 0              | 0.000    |
| 611    | 8   | 72127533  | 72127533  | C         | T       | <i>EYA1</i>         | intronic                    | c.1597+89       | e14+89            | tier3 | 1549               | 105                  | 104              | 0                | 0.000      | 1463                | 177                   | 121               | 52                | 0.301       | 2375            | 229               | 148           | 75            | 0.336   | 4084            | 459              | 455           | 0             | 0.000   | 2230             | 279                | 275            | 0              | 0.000    |
| 611    | 8   | 116424437 | 116424437 | G         | C       | <i>TRPS1</i>        | 3_prime_untranslated_region | c.*1814         | NULL              | tier3 | 445                | 34                   | 34               | 0                | 0.000      | 738                 | 133                   | 99                | 33                | 0.250       | 812             | 69                | 49            | 20            | 0.290   | 993             | 143              | 142           | 0             | 0.000   | 837              | 0                  | 0              | 0              | NA       |
| 611    | 9   | 103338826 | 103338826 | C         | T       | <i>TMEFF1</i>       | nonsense                    | c.1087          | p.R363*           | tier1 | 9353               | 999                  | 983              | 10               | 0.010      | 123                 | 2                     | 1                 | 1                 | 0.500       | 14226           | 1630              | 1016          | 601           | 0.372   | 27451           | 3387             | 3382          | 4             | 0.000   | 19021            | 2398               | 2388           | 4              | 0.000    |
| 611    | 9   | 131502394 | 131502394 | G         | A       | <i>ZER1</i>         | silent                      | c.1858          | p.L620            | tier1 | 13177              | 1286                 | 1276             | 7                | 0.005      | 14496               | 1927                  | 1487              | 430               | 0.224       | 11271           | 1139              | 883           | 255           | 0.224   | 38977           | 4802             | 4799          | 1             | 0.000   | 22185            | 2704               | 2702           | 0              | 0.000    |
| 611    | 11  | 6648113   | 6648113   | C         | T       | <i>DCHS1</i>        | missense                    | c.6157          | p.V2053M          | tier1 | 13448              | 1544                 | 1529             | 9                | 0.006      | 18292               | 2787                  | 2385              | 394               | 0.142       | 13078           | 1624              | 1304          | 316           | 0.195   | 27951           | 3995             | 3992          | 1             | 0.000   | 21789            | 3272               | 3265           | 0              | 0.000    |
| 611    | 11  | 25004690  | 25004690  | A         | G       | <i>LUZP2</i>        | missense                    | c.616           | p.M206V           | tier1 | 42802              | 4243                 | 4231             | 2                | 0.000      | 38780               | 4819                  | 4449              | 348               | 0.073       | 46612           | 4847              | 4425          | 399           | 0.083   | 85559           | 10251            | 10249         | 0             | 0.000   | 58070            | 7108               | 7089           | 0              | 0.000    |
| 611    | 11  | 125298875 | 125298875 | C         | T       | <i>PKNOX2</i>       | intronic                    | c.937-33        | e8-33             | tier2 | 23043              | 2669                 | 2659             | 4                | 0.002      | 21617               | 2936                  | 2431              | 492               | 0.168       | 27834           | 3446              | 2883          | 532           | 0.156   | 55863           | 7646             | 7643          | 0             | 0.000   | 36314            | 5239               | 5229           | 0              | 0.000    |
| 611    | 12  | 53553483  | 53553483  | T         | C       | <i>CSAD</i>         | missense                    | c.1313          | p.N438S           | tier1 | 7170               | 932                  | 929              | 3                | 0.003      | 20403               | 2365                  | 2345              | 879               | 0.267       | 19174           | 2587              | 1818          | 748           | 0.262   | 26492           | 3963             | 3962          | 0             | 0.000   | 18518            | 2758               | 2744           | 0              | 0.000    |
| 611    | 14  | 23072764  | 23072764  | T         | A       | <i>ABHD4</i>        | 3_prime_untranslated_region | c.*23072764     | NULL              | tier3 | 15259              | 1488                 | 1480             | 8                | 0.005      | 21294               | 3178                  | 2359              | 777               | 0.248       | 11665           | 1264              | 956           | 303           | 0.241   | 25949           | 3426             | 3424          | 0             | 0.000   | 20752            | 2877               | 2866           | 0              | 0.000    |
| 611    | 14  | 104216205 | 104216205 | G         | A       | <i>PPP1R13B</i>     | missense                    | c.895           | p.R299C           | tier1 | 5783               | 516                  | 515              | 0                | 0.000      | 7995                | 1079                  | 757               | 317               | 0.295       | 7698            | 833               | 589           | 241           | 0.290   | 10755           | 1235             | 1231          | 2             | 0.000   | 7363             | 927                | 925            | 0              | 0.000    |
| 611    | 15  | 66008017  | 66008017  | G         | A       | <i>DENND4A</i>      | intronic                    | c.1808-56       | e12-56            | tier4 | 832                | 102                  | 102              | 0                | 0.000      | 1718                | 327                   | 236               | 89                | 0.274       | 2125            | 293               | 237           | 56            | 0.191   | 2938            | 509              | 508           | 0             | 0.000   | 2159             | 356                | 356            | 0              | 0.000    |
| 611    | 16  | 3071729   | 3071729   | G         | A       | <i>TNFRSF12A</i>    | intronic                    | c.334+39        | e3+39             | tier2 | 15049              | 1546                 | 1536             | 6                | 0.004      | 26664               | 3781                  | 2611              | 1133              | 0.303       | 23166           | 2648              | 1856          | 765           | 0.292   | 34221           | 4344             | 4340          | 0             | 0.000   | 23753            | 3174               | 3167           | 0              | 0.000    |
| 611    | 17  | 3661144   | 3661144   | G         | A       | <i>ITGA6</i>        | silent                      | c.876           | p.I292            | tier1 | 7346               | 765                  | 764              | 0                | 0.000      | 13405               | 2318                  | 1752              | 544               | 0.249       | 6899            | 821               | 629           | 183           | 0.225   | 19367           | 2754             | 2752          | 1             | 0.000   | 14580            | 2149               | 2149           | 0              | 0.000    |
| 611    | 17  | 26087697  | 26087697  | G         | T       | <i>NOS2</i>         | missense                    | c.2962          | p.P988T           | tier1 | 40614              | 4444                 | 4420             | 16               | 0.004      | 49671               | 6438                  | 4380              | 1988              | 0.312       | 36749           | 3875              | 2631          | 1191          | 0.312   | 92973           | 11598            | 11592         | 1             | 0.000   | 56334            | 6900               | 6884           | 0              | 0.000    |
| 611    | 18  | 42531913  | 42531913  | G         | A       | <i>SETBP1</i>       | missense                    | c.2608          | p.G870S           | tier1 | 29437              | 3285                 | 3261             | 14               | 0.004      | 36346               | 4819                  | 3395              | 1393              | 0.291       | 33568           | 3669              | 2475          | 1139          | 0.315   | 61869           | 7748             | 7737          | 5             | 0.000   | 43134            | 5370               | 5361           | 1              | 0.000    |
| 611    | 19  | 39787541  | 39787541  | C         | T       | <i>IFNL1</i>        | intronic                    | c.249+19        | e2+19             | tier3 | 12877              | 1445                 | 1436             | 5                | 0.003      | 14639               | 2041                  | 1449              | 576               | 0.284       | 14489           | 1615              | 1077          | 532           | 0.331   | 24841           | 3192             | 3190          | 0             | 0.000   | 17614            | 2334               | 2329           | 0              | 0.000    |
| 611    | 21  | 33684165  | 33684165  | A         | G       | <i>MRAP</i>         | missense                    | c.377           | p.E126G           | tier1 | 21623              | 2546                 | 2534             | 10               | 0.004      | 24384               | 3554                  | 2469              | 1057              | 0.300       | 23550           | 2879              | 1997          | 839           | 0.296   | 46032           | 6446             | 6441          | 1             | 0.000   | 29013            | 4082               | 4073           | 0              | 0.000    |
| 611    | 22  | 23922123  | 23922123  | G         | A       | <i>IGLL1</i>        | intronic                    | c.206+49        | e1+49             | tier2 | 5101               | 490                  | 463              | 24               | 0.049      | 12689               | 1827                  | 1364              | 433               | 0.241       | 14202           | 1363              | 917           | 435           | 0.322   | 27798           | 3368             | 3350          | 8             | 0.002   | 17682            | 2407               | 2385           | 3              | 0.001    |
| 611    | X   | 9757836   | 9757836   | C         | T       | <i>SHROOM2</i>      | intronic                    | c.165+3086      | e1+3086           | tier3 | 3004               | 273                  | 273              | 0                | 0.000      | 6031                | 821                   | 665               | 149               | 0.183       | 7411            | 693               | 556           | 135           | 0.195   | 21649           | 2484             | 2483          | 0             | 0.000   | 14127            | 1764               | 1757           | 0              | 0.000    |
| 130968 | 1   | 6101941   | 6101941   | T         | A       | <i>KCNAB2</i>       | splice_region               | c.119+9         | e2+9              | tier2 | 9117               | 1310                 | 1252             | 54               | 0.041      | 5823                | 791                   | 466               | 313               | 0.402       | 6722            | 729               | 426           | 297           | 0.411   | 7561            | 1246             | 1000          | 237           | 0.192   | 11513            | 1814               | 1225           | 575            | 0.319    |
| 130968 | 1   | 115258747 | 115258747 | C         | T       | <i>NRAS</i>         | missense                    | c.35            | p.G12D            | tier1 | 22176              | 2785                 | 2772             | 8                | 0.003      | 16437               | 1825                  | 1544              | 239               | 0.134       | 19940           | 2099              | 1435          | 552           | 0.278   | 14718           | 1972             | 1785          | 120           | 0.063   | 29726            | 4004               | 4000           | 1              | 0.000    |
| 130968 | 1   | 154960473 | 154960473 | C         | A       | <i>FLAD1</i>        | rna                         | NULL            | NULL              | tier1 | 26444              | 3393                 | 3384             | 5                | 0.001      | 20965               | 2676                  | 2324              | 340               | 0.128       | 18949           | 2200              | 1638          | 550           | 0.251   | 14463           | 2251             | 2202          | 48            | 0.021   | 36546            | 5275               | 5274           | 0              | 0.000    |
| 130968 | 1   | 160144523 | 160144523 | C         | T       | <i>ATP1A4</i>       | missense                    | c.2297          | p.T766M           | tier1 | 2849               | 369                  | 362              | 7                |            |                     |                       |                   |                   |             |                 |                   |               |               |         |                 |                  |               |               |         |                  |                    |                |                |          |

| UPN    | Chr | Start     | Stop      | Reference | Variant | Gene Symbol      | Mutation Type               | Coding Position | Amino Acid Change | Tier  | Normal Total Count | Normal Unique Count* | Normal Ref Count | Normal Var Count | Normal VAF | Initial Total Count | Initial Unique Count* | Initial Ref Count | Initial Var Count | Initial VAF | Pre Total Count | Pre Unique Count* | Pre Ref Count | Pre Var Count | Pre VAF | D30 Total Count | D30 Unique Count* | D30 Ref Count | D30 Var Count | D30 VAF | D100 Total Count | D100 Unique Count* | D100 Ref Count | D100 Var Count | D100 VAF |
|--------|-----|-----------|-----------|-----------|---------|------------------|-----------------------------|-----------------|-------------------|-------|--------------------|----------------------|------------------|------------------|------------|---------------------|-----------------------|-------------------|-------------------|-------------|-----------------|-------------------|---------------|---------------|---------|-----------------|-------------------|---------------|---------------|---------|------------------|--------------------|----------------|----------------|----------|
| 145094 | 21  | 44324363  | 44324363  | G         | A       | <i>NDUVF3</i>    | missense                    | c.1241          | p.G414E           | tier1 | 64410              | 7969                 | 7908             | 54               | 0.007      | 24417               | 3048                  | 1615              | 1419              | 0.468       | 40570           | 5090              | 3905          | 1167          | 0.230   | 694415          | 26990             | 26965         | 18            | 0.001   | 218769           | 18522              | 18445          | 61             | 0.003    |
| 145094 | X   | 18845595  | 18845595  | A         | T       | <i>PPEF1</i>     | missense                    | c.1952          | p.N651I           | tier1 | 23300              | 3453                 | 3410             | 41               | 0.012      | 12714               | 1690                  | 93                | 1596              | 0.945       | 22525           | 3192              | 1768          | 1418          | 0.445   | 403663          | 20214             | 20160         | 36            | 0.002   | 140265           | 14019              | 13687          | 306            | 0.022    |
| 147444 | 1   | 34164429  | 34164429  | G         | T       | <i>CSMD2</i>     | missense                    | c.3849          | p.S1283R          | tier1 | 10290              | 1129                 | 1128             | 0                | 0.000      | 16483               | 2413                  | 1916              | 485               | 0.202       | 6187            | 946               | 590           | 354           | 0.375   | 15888           | 2354              | 2354          | 0             | 0.000   | 21486            | 0                  | 0              | 0              | NA       |
| 147444 | 1   | 38262323  | 38262323  | C         | A       | <i>MANEAL</i>    | intronic                    | c.661-93        | e3-93             | tier3 | 2165               | 275                  | 275              | 0                | 0.000      | 7229                | 1513                  | 1130              | 379               | 0.251       | 462             | 97                | 63            | 34            | 0.351   | 4264            | 891               | 890           | 0             | 0.000   | 3351             | 714                | 714            | 0              | 0.000    |
| 147444 | 1   | 89480937  | 89480937  | G         | A       | <i>GBP3</i>      | intronic                    | c.318+33        | e2+33             | tier3 | 7300               | 649                  | 647              | 2                | 0.003      | 11614               | 1649                  | 1280              | 359               | 0.219       | 9529            | 1155              | 783           | 363           | 0.317   | 13756           | 1811              | 1803          | 0             | 0.000   | 16354            | 1990               | 1986           | 0              | 0.000    |
| 147444 | 1   | 163306613 | 163306613 | C         | T       | <i>NUF2</i>      | missense                    | c.410           | p.T137M           | tier1 | 3443               | 301                  | 301              | 0                | 0.000      | 4347                | 572                   | 427               | 145               | 0.254       | 5278            | 633               | 411           | 221           | 0.350   | 5388            | 705               | 701           | 2             | 0.000   | 6979             | 866                | 864            | 1              | 0.000    |
| 147444 | 1   | 201016781 | 201016781 | C         | T       | <i>CACNA1S</i>   | intronic                    | c.4442-27       | e37-27            | tier3 | 16351              | 1886                 | 1885             | 0                | 0.000      | 25629               | 3574                  | 2693              | 870               | 0.244       | 14418           | 1908              | 1146          | 754           | 0.397   | 25369           | 3725              | 3717          | 1             | 0.000   | 36926            | 5116               | 5106           | 2              | 0.000    |
| 147444 | 1   | 226061960 | 226061960 | G         | A       | <i>TMEM63A</i>   | intronic                    | c.266+28        | e2+28             | tier3 | 16399              | 2317                 | 2312             | 5                | 0.002      | 29734               | 3693                  | 2795              | 881               | 0.240       | 15664           | 2217              | 1412          | 799           | 0.361   | 30394           | 4252              | 4244          | 3             | 0.001   | 41701            | 5988               | 5975           | 2              | 0.000    |
| 147444 | 2   | 42119915  | 42119915  | C         | A       | <i>LOC388942</i> | rna                         | NULL            | NULL              | tier1 | 15872              | 1949                 | 1949             | 0                | 0.000      | 33223               | 4789                  | 3666              | 1062              | 0.225       | 13828           | 1925              | 1192          | 728           | 0.379   | 29304           | 4375              | 4363          | 1             | 0.000   | 43219            | 6097               | 6090           | 1              | 0.000    |
| 147444 | 2   | 42936013  | 42936013  | G         | T       | <i>MTA3</i>      | splice_site                 | c.1303-1        | e14-1             | tier1 | 5984               | 0                    | 0                | 0                | 0.000      | 1321                | 196                   | 141               | 54                | 0.277       | 2977            | 393               | 226           | 166           | 0.423   | 7442            | 921               | 920           | 0             | 0.000   | 2843             | 354                | 353            | 0              | 0.000    |
| 147444 | 2   | 128262356 | 128262356 | T         | C       | <i>IWS1</i>      | missense                    | c.1123          | p.M375V           | tier1 | 1566               | 0                    | 0                | 0                | 0.000      | 5088                | 1002                  | 775               | 218               | 0.220       | 1101            | 192               | 125           | 63            | 0.335   | 3646            | 695               | 694           | 0             | 0.000   | 2270             | 377                | 377            | 0              | 0.000    |
| 147444 | 2   | 216972458 | 216972458 | C         | G       | <i>XRC5</i>      | intronic                    | c.1+37          | e0+37             | tier2 | 13512              | 1330                 | 1329             | 0                | 0.000      | 22640               | 3716                  | 2783              | 915               | 0.247       | 7246            | 1084              | 652           | 424           | 0.394   | 18493           | 2929              | 2923          | 1             | 0.000   | 24099            | 3335               | 3330           | 0              | 0.000    |
| 147444 | 3   | 158306755 | 158306755 | A         | T       | <i>MLF1</i>      | intronic                    | c.96-3468       | e2-3468           | tier4 | 10373              | 943                  | 942              | 0                | 0.000      | 14220               | 2013                  | 1495              | 498               | 0.250       | 6438            | 865               | 527           | 337           | 0.390   | 15470           | 2192              | 2188          | 0             | 0.000   | 16084            | 2054               | 2052           | 0              | 0.000    |
| 147444 | 4   | 100761543 | 100761543 | C         | A       | <i>DAPP1</i>     | missense                    | c.322           | p.H108N           | tier1 | 16889              | 1615                 | 1614             | 0                | 0.000      | 16531               | 2137                  | 1767              | 362               | 0.170       | 15332           | 1944              | 1456          | 479           | 0.248   | 23704           | 3119              | 3117          | 0             | 0.000   | 39234            | 5007               | 5006           | 0              | 0.000    |
| 147444 | 4   | 149358015 | 149358015 | C         | T       | <i>NR3C2</i>     | splice_site                 | c.1-1           | e1-1              | tier1 | 8884               | 737                  | 737              | 0                | 0.000      | 18409               | 2745                  | 2187              | 536               | 0.197       | 7838            | 1045              | 720           | 318           | 0.306   | 17182           | 2480              | 2478          | 0             | 0.000   | 17484            | 2372               | 2370           | 0              | 0.000    |
| 147444 | 5   | 1331845   | 1331845   | C         | T       | <i>CLPTM1L</i>   | 5_prime_untranslated_region | c.-1331845      | NULL              | tier3 | 7188               | 709                  | 709              | 0                | 0.000      | 18907               | 2183                  | 1651              | 528               | 0.242       | 8869            | 1189              | 735           | 452           | 0.381   | 18715           | 2550              | 2548          | 0             | 0.000   | 27835            | 3489               | 3488           | 1              | 0.000    |
| 147444 | 5   | 38464253  | 38464253  | C         | T       | <i>EGFLAM</i>    | 3_prime_untranslated_region | c.*165          | NULL              | tier3 | 25273              | 2674                 | 2673             | 1                | 0.000      | 37488               | 4629                  | 3523              | 1081              | 0.235       | 21658           | 2897              | 1888          | 994           | 0.345   | 39935           | 5325              | 5322          | 0             | 0.000   | 65825            | 8669               | 8666           | 1              | 0.000    |
| 147444 | 5   | 39331903  | 39331903  | C         | T       | <i>C9</i>        | missense                    | c.490           | p.G164R           | tier1 | 3614               | 396                  | 392              | 3                | 0.008      | 7230                | 386                   | 578               | 266               | 0.315       | 5114            | 681               | 419           | 257           | 0.380   | 7180            | 929               | 928           | 0             | 0.000   | 10463            | 1327               | 1323           | 2              | 0.000    |
| 147444 | 6   | 39841127  | 39841127  | G         | A       | <i>DAAM2</i>     | missense                    | c.1158          | p.M386I           | tier1 | 22892              | 2709                 | 2708             | 1                | 0.000      | 36571               | 4423                  | 3222              | 1184              | 0.269       | 23555           | 3154              | 1965          | 1172          | 0.374   | 27379           | 3620              | 3616          | 1             | 0.000   | 55044            | 7235               | 7228           | 2              | 0.000    |
| 147444 | 6   | 72086766  | 72086766  | A         | G       | <i>LINC00472</i> | intronic                    | c.NULL          | NULL              | tier3 | 5832               | 722                  | 719              | 1                | 0.001      | 8420                | 1484                  | 1127              | 352               | 0.238       | 5386            | 913               | 569           | 341           | 0.375   | 8670            | 1526              | 1524          | 1             | 0.000   | 12365            | 2034               | 2032           | 1              | 0.000    |
| 147444 | 6   | 167571516 | 167571516 | G         | A       | <i>GPR31</i>     | 5_prime_untranslated_region | c.-197          | NULL              | tier3 | 8744               | 1006                 | 1006             | 0                | 0.000      | 14622               | 2606                  | 1969              | 630               | 0.242       | 3344            | 584               | 391           | 192           | 0.329   | 16196           | 2761              | 2759          | 0             | 0.000   | 14664            | 2330               | 2329           | 0              | 0.000    |
| 147444 | 7   | 57522854  | 57522854  | A         | T       | <i>ZNF716</i>    | missense                    | c.242           | p.E81V            | tier1 | 2895               | 288                  | 287              | 1                | 0.003      | 3974                | 838                   | 584               | 249               | 0.299       | 1176            | 177               | 70            | 107           | 0.605   | 4731            | 890               | 888           | 0             | 0.000   | 4150             | 625                | 624            | 0              | 0.000    |
| 147444 | 7   | 100190385 | 100190385 | C         | T       | <i>FBXO24</i>    | intronic                    | c.673-21        | e5-21             | tier3 | 4295               | 457                  | 457              | 0                | 0.000      | 7017                | 1252                  | 863               | 378               | 0.305       | 1137            | 187               | 56            | 130           | 0.699   | 6729            | 0                 | 0             | 0             | NA      | 10618            | 1514               | 1510           | 3              | 0.000    |
| 147444 | 9   | 43628454  | 43628454  | G         | A       | <i>SPATA31A6</i> | intronic                    | c.309-76        | e4-76             | tier3 | 3697               | 578                  | 578              | 0                | 0.000      | 8414                | 1541                  | 1206              | 330               | 0.215       | 2425            | 526               | 356           | 170           | 0.323   | 6629            | 1354              | 1352          | 0             | 0.000   | 8862             | 1746               | 1746           | 0              | 0.000    |
| 147444 | 10  | 24762962  | 24762962  | C         | T       | <i>KIAA1217</i>  | missense                    | c.1652          | p.A551V           | tier1 | 24207              | 2668                 | 2665             | 1                | 0.000      | 34026               | 4225                  | 3132              | 1062              | 0.253       | 14479           | 1937              | 1231          | 705           | 0.364   | 37714           | 4858              | 4845          | 1             | 0.000   | 45456            | 5957               | 5948           | 2              | 0.000    |
| 147444 | 10  | 46148449  | 46148449  | A         | T       | <i>ZFAND4</i>    | nonsense                    | c.243           | p.Y81*            | tier1 | 15979              | 0                    | 0                | 0                | 0.000      | 15247               | 2183                  | 1575              | 601               | 0.276       | 20851           | 2692              | 1644          | 1028          | 0.385   | 24361           | 3340              | 3337          | 0             | 0.000   | 32088            | 4172               | 4172           | 0              | 0.000    |
| 147444 | 11  | 3687330   | 3687330   | C         | T       | <i>CHRNA10</i>   | 3_prime_untranslated_region | c.*7            | NULL              | tier3 | 11245              | 1190                 | 1189             | 0                | 0.000      | 10857               | 1639                  | 1316              | 319               | 0.195       | 4935            | 619               | 394           | 225           | 0.363   | 13933           | 1998              | 1996          | 0             | 0.000   | 19592            | 2631               | 2631           | 0              | 0.000    |
| 147444 | 11  | 64821688  | 64821688  | C         | A       | <i>NAALADL1</i>  | intronic                    | c.992+34        | e6+34             | tier3 | 4423               | 555                  | 554              | 0                | 0.000      | 12071               | 2706                  | 2112              | 581               | 0.216       | 782             | 165               | 95            | 70            | 0.424   | 8350            | 1819              | 1817          | 0             | 0.000   | 4226             | 885                | 884            | 0              | 0.000    |
| 147444 | 12  | 57579580  | 57579580  | C         | T       | <i>LRP1</i>      | missense                    | c.6730          | p.R2244W          | tier1 | 6181               | 696                  | 696              | 0                | 0.000      | 26763               | 3903                  | 2873              | 1013              | 0.261       | 6627            | 914               | 554           | 360           | 0.394   | 17975           | 2775              | 2772          | 0             | 0.000   | 33845            | 4700               | 4693           | 4              | 0.000    |
| 147444 | 12  | 57627594  | 57627594  | G         | T       | <i>SHMT2</i>     | missense                    | c.1186          | p.A396S           | tier1 | 13274              | 1571                 | 1571             | 0                | 0.000      | 22545               | 3253                  | 2583              | 886               | 0.274       | 7162            | 1122              | 636           | 483           | 0.432   | 18905           | 3067              | 3061          | 2             | 0.000   | 25936            | 3859               | 3858           | 1              | 0.000    |
| 147444 | 12  | 113444369 | 113444369 | G         | A       | <i>OAS2</i>      | silent                      | c.1620          | p.K540            | tier1 | 15418              | 1653                 | 1651             | 1                | 0.001      | 21520               | 2598                  | 2053              | 539               | 0.208       | 17323           | 2268              | 1479          | 773           | 0.343   | 31905           | 4057              | 4054          | 1             | 0.000   | 39100            | 4943               | 4940           | 2              | 0.000    |
| 147444 | 14  | 50612016  | 50612016  | C         | G       | <i>SOS2</i>      | missense                    | c.2539          | p.V847L           | tier1 | 10465              | 965                  | 965              | 0                | 0.000      | 18080               | 2343                  | 1784              | 553               | 0.237       | 18691           | 2434              | 1589          | 838           | 0.345   | 21243           | 2773              | 2770          | 2             | 0.000   | 31737            | 3941               | 3935           | 0              | 0.000    |
| 147444 | 16  | 4384836   | 4384836   | C         | T       | <i>GLIS2</i>     | missense                    | c.380           | p.P127L           | tier1 | 7854               | 786                  | 786              | 0                | 0.000      | 15154               | 2076                  | 1685              | 388               | 0.187       | 3524            | 497               | 356           | 141           | 0.284   | 13459           | 1988              | 1988          | 0             | 0.000   | 29256            | 3913               | 3913           | 0              | 0.000    |
| 147444 | 16  | 68721437  | 68721437  | G         | A       | <i>CDH3</i>      | silent                      | c.1593          |                   |       |                    |                      |                  |                  |            |                     |                       |                   |                   |             |                 |                   |               |               |         |                 |                   |               |               |         |                  |                    |                |                |          |

| UPN    | Chr | Start     | Stop      | Reference | Variant | Gene Symbol     | Mutation Type               | Coding Position | Amino Acid Change | Tier  | Normal Total Count | Normal Unique Count* | Normal Ref Count | Normal Var Count | Normal VAF | Initial Total Count | Initial Unique Count* | Initial Ref Count | Initial Var Count | Initial VAF | Pre Total Count | Pre Unique Count* | Pre Ref Count | Pre Var Count | Pre VAF | D30 Total Count | D30 Unique Count | D30 Ref Count | D30 Var Count | D30 VAF | D100 Total Count | D100 Unique Count* | D100 Ref Count | D100 Var Count | D100 VAF |
|--------|-----|-----------|-----------|-----------|---------|-----------------|-----------------------------|-----------------|-------------------|-------|--------------------|----------------------|------------------|------------------|------------|---------------------|-----------------------|-------------------|-------------------|-------------|-----------------|-------------------|---------------|---------------|---------|-----------------|------------------|---------------|---------------|---------|------------------|--------------------|----------------|----------------|----------|
| 147457 | 2   | 26177162  | 26177162  | G         | A       | KIF3C           | silent                      | c.1863          | p.N62I            | tier1 | 27245              | 3864                 | 3823             | 35               | 0.009      | 34757               | 3636                  | 2585              | 1031              | 0.285       | NA              | NA                | NA            | NA            | NA      | 55934           | 352              | 344           | 7             | 0.020   | NA               | NA                 | NA             | NA             | NA       |
| 147457 | 2   | 26644243  | 26644243  | G         | A       | CCDC164         | missense                    | c.331           | p.E111K           | tier1 | 52526              | 6231                 | 6157             | 71               | 0.011      | 49967               | 4340                  | 3163              | 1169              | 0.270       | NA              | NA                | NA            | NA            | NA      | 419492          | 1765             | 1757          | 8             | 0.005   | NA               | NA                 | NA             | NA             | NA       |
| 147457 | 2   | 26800492  | 26800492  | G         | A       | C2orf70         | missense                    | c.457           | p.V153I           | tier1 | 17275              | 2496                 | 2483             | 12               | 0.005      | 31085               | 3339                  | 2489              | 836               | 0.251       | NA              | NA                | NA            | NA            | NA      | 37946           | 275              | 274           | 0             | 0.000   | NA               | NA                 | NA             | NA             | NA       |
| 147457 | 2   | 27261955  | 27261955  | C         | T       | TMEM214         | missense                    | c.1448          | p.T483M           | tier1 | 25164              | 3393                 | 3357             | 31               | 0.009      | 28439               | 2917                  | 2030              | 875               | 0.301       | NA              | NA                | NA            | NA            | NA      | 196050          | 815              | 813           | 2             | 0.000   | NA               | NA                 | NA             | NA             | NA       |
| 147457 | 2   | 27310227  | 27310227  | C         | T       | KHK             | splice_region               | c.92+8          | e1+8              | tier2 | 12150              | 1593                 | 1573             | 17               | 0.011      | 19205               | 2114                  | 1308              | 798               | 0.379       | NA              | NA                | NA            | NA            | NA      | 98513           | 389              | 384           | 5             | 0.013   | NA               | NA                 | NA             | NA             | NA       |
| 147457 | 2   | 27592008  | 27592008  | G         | A       | EIF2B4          | missense                    | c.283           | p.R95W            | tier1 | 48723              | 5745                 | 5696             | 44               | 0.008      | 31799               | 2663                  | 1991              | 660               | 0.249       | NA              | NA                | NA            | NA            | NA      | 340406          | 1359             | 1357          | 1             | 0.000   | NA               | NA                 | NA             | NA             | NA       |
| 147457 | 2   | 27801023  | 27801023  | G         | A       | C2orf16         | silent                      | c.1584          | p.T528            | tier1 | 49704              | 5839                 | 5767             | 68               | 0.012      | 62611               | 4740                  | 3400              | 1317              | 0.279       | NA              | NA                | NA            | NA            | NA      | 398132          | 1510             | 1504          | 4             | 0.003   | NA               | NA                 | NA             | NA             | NA       |
| 147457 | 2   | 56403145  | 56403145  | C         | T       | LOC100129434    | 5_prime_untranslated_region | c.-56403145     | NULL              | tier2 | 30072              | 3662                 | 3615             | 35               | 0.010      | 39079               | 3050                  | 2166              | 878               | 0.288       | NA              | NA                | NA            | NA            | NA      | 123501          | 631              | 627           | 2             | 0.000   | NA               | NA                 | NA             | NA             | NA       |
| 147457 | 2   | 58459235  | 58459235  | G         | A       | FANCL           | missense                    | c.109           | p.H37Y            | tier1 | 13637              | 1776                 | 1763             | 13               | 0.007      | 17012               | 1659                  | 1163              | 491               | 0.297       | NA              | NA                | NA            | NA            | NA      | 57782           | 276              | 273           | 3             | 0.000   | NA               | NA                 | NA             | NA             | NA       |
| 147457 | 2   | 61331050  | 61331050  | G         | A       | KIAA1841        | silent                      | c.1428          | p.P476            | tier1 | 18861              | 2518                 | 2491             | 24               | 0.010      | 26024               | 2812                  | 1988              | 814               | 0.291       | NA              | NA                | NA            | NA            | NA      | 58194           | 266              | 265           | 1             | 0.000   | NA               | NA                 | NA             | NA             | NA       |
| 147457 | 2   | 70504464  | 70504464  | C         | T       | PCYOX1          | silent                      | c.1458          | p.N486            | tier1 | 20184              | 2781                 | 2738             | 41               | 0.015      | 42952               | 4283                  | 2982              | 1283              | 0.301       | NA              | NA                | NA            | NA            | NA      | 229202          | 948              | 945           | 2             | 0.000   | NA               | NA                 | NA             | NA             | NA       |
| 147457 | 2   | 73829499  | 73829499  | C         | T       | ALMS1           | splice_region               | c.12295+4       | e20+4             | tier2 | 36808              | 4521                 | 4479             | 37               | 0.008      | 33371               | 3007                  | 2047              | 950               | 0.317       | NA              | NA                | NA            | NA            | NA      | 184306          | 816              | 802           | 8             | 0.010   | NA               | NA                 | NA             | NA             | NA       |
| 147457 | 2   | 74173887  | 74173887  | G         | A       | DGUOK           | missense                    | c.297           | p.M99I            | tier1 | 20765              | 3307                 | 3272             | 34               | 0.010      | 28136               | 3815                  | 2704              | 1098              | 0.289       | NA              | NA                | NA            | NA            | NA      | 91628           | 539              | 518           | 18            | 0.034   | NA               | NA                 | NA             | NA             | NA       |
| 147457 | 2   | 74867224  | 74867224  | C         | T       | C2orf65         | missense                    | c.179           | p.R60H            | tier1 | 55784              | 6862                 | 6761             | 84               | 0.012      | 52644               | 5052                  | 3606              | 1419              | 0.282       | NA              | NA                | NA            | NA            | NA      | 475210          | 2051             | 2017          | 28            | 0.014   | NA               | NA                 | NA             | NA             | NA       |
| 147457 | 2   | 75158001  | 75158001  | C         | T       | ENSG00000204792 | rna                         | NULL            | NULL              | tier1 | 34294              | 4184                 | 4139             | 43               | 0.010      | 47513               | 4285                  | 3048              | 1224              | 0.287       | NA              | NA                | NA            | NA            | NA      | 190008          | 830              | 821           | 7             | 0.008   | NA               | NA                 | NA             | NA             | NA       |
| 147457 | 2   | 91800800  | 91800800  | G         | A       | ENSG00000233991 | 3_prime_untranslated_region | c.*91800800     | NULL              | tier2 | 133344             | 17358                | 17292            | 41               | 0.002      | 147828              | 13612                 | 12816             | 745               | 0.055       | NA              | NA                | NA            | NA            | NA      | 424083          | 2440             | 2412          | 8             | 0.003   | NA               | NA                 | NA             | NA             | NA       |
| 147457 | 2   | 131704217 | 131704217 | C         | T       | ARHGEF4         | missense                    | c.3004          | p.R1002C          | tier1 | 18730              | 2500                 | 2478             | 22               | 0.009      | 24811               | 2622                  | 1910              | 699               | 0.268       | NA              | NA                | NA            | NA            | NA      | 74943           | 362              | 350           | 7             | 0.020   | NA               | NA                 | NA             | NA             | NA       |
| 147457 | 2   | 141459402 | 141459402 | G         | A       | LRP1B           | silent                      | c.6315          | p.N2105           | tier1 | 59363              | 6861                 | 6824             | 30               | 0.004      | 54726               | 4076                  | 3676              | 1009              | 0.215       | NA              | NA                | NA            | NA            | NA      | 582577          | 2229             | 2229          | 0             | 0.000   | NA               | NA                 | NA             | NA             | NA       |
| 147457 | 2   | 160983105 | 160983105 | G         | A       | ITGB6           | silent                      | c.1668          | p.G556            | tier1 | 8514               | 1059                 | 1053             | 6                | 0.006      | 8706                | 948                   | 719               | 228               | 0.241       | NA              | NA                | NA            | NA            | NA      | 69591           | 277              | 277           | 0             | 0.000   | NA               | NA                 | NA             | NA             | NA       |
| 147457 | 2   | 170134318 | 170134318 | C         | T       | LRP2            | missense                    | c.1709          | p.R570H           | tier1 | 22666              | 2925                 | 2893             | 31               | 0.011      | 20311               | 2603                  | 1812              | 786               | 0.303       | NA              | NA                | NA            | NA            | NA      | 241150          | 975              | 970           | 5             | 0.000   | NA               | NA                 | NA             | NA             | NA       |
| 147457 | 2   | 179613743 | 179613743 | C         | T       | TTN             | missense                    | c.13384         | p.E4462K          | tier1 | 2413               | 310                  | 307              | 3                | 0.010      | 6760                | 742                   | 540               | 202               | 0.272       | NA              | NA                | NA            | NA            | NA      | 13490           | 65               | 65            | 0             | 0.000   | NA               | NA                 | NA             | NA             | NA       |
| 147457 | 2   | 198274685 | 198274685 | C         | T       | SF3B1           | missense                    | c.713           | p.R238H           | tier1 | 15354              | 1483                 | 1470             | 11               | 0.007      | 20271               | 1773                  | 1310              | 458               | 0.259       | NA              | NA                | NA            | NA            | NA      | 73244           | 222              | 222           | 0             | 0.000   | NA               | NA                 | NA             | NA             | NA       |
| 147457 | 2   | 201619547 | 201619547 | C         | T       | AOX2P           | 3_prime_untranslated_region | c.*201619547    | NULL              | tier3 | 36167              | 4367                 | 4329             | 33               | 0.008      | 36897               | 3282                  | 2461              | 803               | 0.246       | NA              | NA                | NA            | NA            | NA      | 392259          | 1448             | 1432          | 12            | 0.008   | NA               | NA                 | NA             | NA             | NA       |
| 147457 | 2   | 203948117 | 203948117 | G         | A       | NBEAL1          | missense                    | c.860           | p.R287H           | tier1 | 12825              | 2428                 | 2401             | 26               | 0.011      | 19494               | 2420                  | 1709              | 709               | 0.293       | NA              | NA                | NA            | NA            | NA      | 65429           | 799              | 799           | 0             | 0.000   | NA               | NA                 | NA             | NA             | NA       |
| 147457 | 2   | 213886807 | 213886807 | G         | A       | IKZF2           | missense                    | c.622           | p.R208C           | tier1 | 12114              | 1633                 | 1621             | 12               | 0.007      | 21353               | 2293                  | 1778              | 513               | 0.224       | NA              | NA                | NA            | NA            | NA      | 84581           | 416              | 414           | 1             | 0.000   | NA               | NA                 | NA             | NA             | NA       |
| 147457 | 2   | 215798769 | 215798769 | C         | T       | ABCA12          | intronic                    | c.7680+33       | e52+33            | tier3 | 17922              | 2244                 | 2233             | 10               | 0.004      | 12457               | 1227                  | 1003              | 221               | 0.181       | NA              | NA                | NA            | NA            | NA      | 123380          | 531              | 528           | 1             | 0.000   | NA               | NA                 | NA             | NA             | NA       |
| 147457 | 2   | 218938006 | 218938006 | C         | T       | RUFY4           | missense                    | c.427           | p.R143C           | tier1 | 44597              | 5378                 | 5337             | 35               | 0.007      | 49790               | 4124                  | 2927              | 1187              | 0.289       | NA              | NA                | NA            | NA            | NA      | 315806          | 1307             | 1293          | 7             | 0.005   | NA               | NA                 | NA             | NA             | NA       |
| 147457 | 2   | 219538351 | 219538351 | G         | A       | STK36           | missense                    | c.88            | p.V30M            | tier1 | 26783              | 3613                 | 3585             | 27               | 0.007      | 29394               | 2461                  | 1875              | 1009              | 0.289       | NA              | NA                | NA            | NA            | NA      | 193441          | 843              | 830           | 12            | 0.014   | NA               | NA                 | NA             | NA             | NA       |
| 147457 | 2   | 219544699 | 219544699 | C         | T       | STK36           | silent                      | c.1032          | p.L344            | tier1 | 13816              | 2376                 | 2359             | 17               | 0.007      | 21860               | 2554                  | 1869              | 680               | 0.267       | NA              | NA                | NA            | NA            | NA      | 43770           | 343              | 343           | 0             | 0.000   | NA               | NA                 | NA             | NA             | NA       |
| 147457 | 2   | 220312930 | 220312930 | C         | T       | SPEG            | silent                      | c.1050          | p.T350            | tier1 | 51172              | 6462                 | 6396             | 54               | 0.008      | 39196               | 3226                  | 2368              | 846               | 0.263       | NA              | NA                | NA            | NA            | NA      | 265917          | 1402             | 1396          | 2             | 0.000   | NA               | NA                 | NA             | NA             | NA       |
| 147457 | 2   | 226447163 | 226447163 | G         | A       | NYAP2           | missense                    | c.1030          | p.V344M           | tier1 | 7589               | 1459                 | 1362             | 16               | 0.012      | 9152                | 1699                  | 1258              | 390               | 0.237       | NA              | NA                | NA            | NA            | NA      | 57406           | 316              | 311           | 0             | 0.000   | NA               | NA                 | NA             | NA             | NA       |
| 147457 | 2   | 226447731 | 226447731 | G         | A       | NYAP2           | missense                    | c.1598          | p.R533H           | tier1 | 26535              | 3480                 | 3444             | 35               | 0.010      | 27168               | 2294                  | 1629              | 659               | 0.288       | NA              | NA                | NA            | NA            | NA      | 68068           | 384              | 383           | 0             | 0.000   | NA               | NA                 | NA             | NA             | NA       |
| 147457 | 2   | 227872842 | 227872842 | C         | T       | COL4A4          | silent                      | c.4701          | p.A1567           | tier1 | 43657              | 4699                 | 4678             | 17               | 0.004      | 31418               | 2319                  | 1979              | 338               | 0.146       | NA              | NA                | NA            | NA            | NA      | 221277          | 930              | 920           | 5             | 0.005   | NA               | NA                 | NA             | NA             | NA       |
| 147457 | 2   | 227915822 | 227915822 | G         | A       | COL4A4          | silent                      | c.3021          | p.Y1007           | tier1 | 8324               | 1031                 | 1022             | 9                | 0.009      | 12382               | 1111                  | 782               | 327               | 0.295       | NA              | NA                | NA            | NA            | NA      | 16473           | 103              | 103           | 0             | 0.000   | NA               | NA                 | NA             | NA             | NA       |
| 147457 | 2   | 238245159 | 238245159 | C         | T       | COL6A3          | missense                    | c.8584          | p.V2862I          | tier1 | 4878               | 1195                 | 1178             | 16               | 0.013      | 6734                | 1357                  | 968               | 385               | 0.285       | NA              | NA                | NA            | NA            | NA      | 14056           | 127              | 122           | 4             | 0.032   | NA               | NA                 | NA             | NA             | NA       |
| 147457 | 2   | 238461018 | 238461018 | C         | T       | MLPH            | nonsense                    | c.1714          | p.R572*           | tier1 | 17479              | 2156                 | 2135             | 19               | 0.009      | 19667               | 1753                  | 1365              | 384               | 0.220       | NA              | NA                | NA            | NA            | NA      | 63549           | 352              | 352           | 0             | 0.000   | NA               | NA                 | NA             | NA             | NA       |
| 147457 | 2   | 241517127 | 241517127 | C         | T       | RNPEL1          | missense                    | c.1303          | p.R435C           | tier1 | 53678              | 6279                 | 6228             | 45               | 0.007      | 44715               | 3667                  | 2675              | 980               | 0.268       | NA              | NA                | NA            | NA            | NA      | 297421          | 1153             | 1141          | 8             | 0.007   | NA               | NA                 | NA             | NA             | NA       |
| 147457 | 3   | 9768381   | 9768381   | C         | T       | CPNE9           | missense                    | c.572           | p.S191L           | tier1 | 10305              | 1355                 | 1341             | 12               | 0.009      | 11500               | 1246                  | 879               | 367               | 0.295       | NA              | NA                | NA            | NA            | NA      | 69500           | 326              | 324           | 2             | 0.000   | NA               | NA                 | NA             | NA             | NA       |
| 147457 | 3   | 11468460  | 11468460  | C         | T       | ATG7            | intronic                    | c.2079+60       | e17+60            | tier3 | 2640               | 574                  | 564              | 9                | 0.016      | 8229                | 1675                  | 1158              | 512               | 0.307       | NA              | NA                | NA            | NA            | NA      | 5342            | 69               | 69            | 0             | 0.000   | NA               | NA                 | NA             | NA             | NA       |
| 147457 | 3   | 14552987  | 14552987  | G         | A       | GRIP2           | 5_prime_untranslated_region | c.-14552987     | NULL              | tier3 | 2635               | 638                  | 632              | 5                | 0.008      | 4623                | 983                   | 678               | 303               | 0.309       | NA              | NA                | NA            | NA            | NA      | 3152            | 44               | 37            | 7             | 0.159   | NA               | NA                 | NA             | NA             | NA       |
| 147457 | 3   | 14862667  | 14862667  | C         | T       | FGD5            | missense                    | c.2089          | p.R697W           | tier1 | 55830              | 6689                 | 6614             | 71               | 0.011      | 48724               | 4014                  | 2853              | 1146              | 0.287       | NA              | NA                | NA            | NA</          |         |                 |                  |               |               |         |                  |                    |                |                |          |



| UPN    | Chr | Start     | Stop      | Reference | Variant | Gene Symbol     | Mutation Type               | Coding Position | Amino Acid Change | Tier  | Normal Total Count | Normal Unique Count* | Normal Ref Count | Normal Var Count | Normal VAF | Initial Total Count | Initial Unique Count* | Initial Ref Count | Initial Var Count | Initial VAF | Pre Total Count | Pre Unique Count* | Pre Ref Count | Pre Var Count | Pre VAF | D30 Total Count | D30 Unique Count* | D30 Ref Count | D30 Var Count | D30 VAF | D100 Total Count | D100 Unique Count* | D100 Ref Count | D100 Var Count | D100 VAF |
|--------|-----|-----------|-----------|-----------|---------|-----------------|-----------------------------|-----------------|-------------------|-------|--------------------|----------------------|------------------|------------------|------------|---------------------|-----------------------|-------------------|-------------------|-------------|-----------------|-------------------|---------------|---------------|---------|-----------------|-------------------|---------------|---------------|---------|------------------|--------------------|----------------|----------------|----------|
| 147457 | 5   | 1338034   | 1338034   | G         | A       | CLPTM1L         | silent                      | c.663           | p.R221            | tier1 | 87830              | 9964                 | 9853             | 77               | 0.008      | 70248               | 5076                  | 3463              | 1585              | 0.314       | NA              | NA                | NA            | NA            | NA      | 638897          | 2695              | 2660          | 23            | 0.009   | NA               | NA                 | NA             | NA             | NA       |
| 147457 | 5   | 1483662   | 1483662   | G         | A       | LPCAT1          | intronic                    | c.668-61        | e6-61             | tier3 | 14481              | 2628                 | 2599             | 26               | 0.010      | 24837               | 3664                  | 2555              | 1093              | 0.300       | NA              | NA                | NA            | NA            | NA      | 24241           | 220               | 210           | 9             | 0.041   | NA               | NA                 | NA             | NA             | NA       |
| 147457 | 5   | 6602599   | 6602599   | C         | T       | NSUN2           | missense                    | c.1972          | p.V658M           | tier1 | 23099              | 3676                 | 3627             | 44               | 0.012      | 34628               | 4399                  | 3049              | 1337              | 0.305       | NA              | NA                | NA            | NA            | NA      | 44723           | 352               | 352           | 0             | 0.000   | NA               | NA                 | NA             | NA             | NA       |
| 147457 | 5   | 13762777  | 13762777  | C         | T       | DNAH5           | intronic                    | c.10281+54      | e60+54            | tier3 | 8630               | 2100                 | 2088             | 11               | 0.005      | 13119               | 2377                  | 1745              | 623               | 0.263       | NA              | NA                | NA            | NA            | NA      | 24603           | 236               | 236           | 0             | 0.000   | NA               | NA                 | NA             | NA             | NA       |
| 147457 | 5   | 31995780  | 31995780  | C         | T       | PDZD2           | silent                      | c.1077          | p.H359            | tier1 | 28942              | 3461                 | 3416             | 37               | 0.011      | 63181               | 4432                  | 3112              | 1307              | 0.296       | NA              | NA                | NA            | NA            | NA      | 191301          | 881               | 872           | 5             | 0.000   | NA               | NA                 | NA             | NA             | NA       |
| 147457 | 5   | 34190535  | 34190535  | C         | T       | ENSG00000215156 | 3_prime_untranslated_region | c.*34190535     | NULL              | tier3 | 65126              | 8005                 | 7980             | 11               | 0.001      | 88107               | 7460                  | 7089              | 361               | 0.048       | NA              | NA                | NA            | NA            | NA      | 92824           | 652               | 645           | 0             | 0.000   | NA               | NA                 | NA             | NA             | NA       |
| 147457 | 5   | 35910093  | 35910093  | C         | T       | CAPSL           | missense                    | c.400           | p.E134K           | tier1 | 35003              | 4451                 | 4416             | 32               | 0.007      | 29265               | 3263                  | 2422              | 839               | 0.257       | NA              | NA                | NA            | NA            | NA      | 232307          | 923               | 917           | 5             | 0.005   | NA               | NA                 | NA             | NA             | NA       |
| 147457 | 5   | 41149449  | 41149449  | G         | A       | C6              | silent                      | c.2517          | p.D839            | tier1 | 4240               | 1041                 | 1032             | 9                | 0.009      | 6757                | 1406                  | 973               | 432               | 0.307       | NA              | NA                | NA            | NA            | NA      | 7136            | 88                | 88            | 0             | 0.000   | NA               | NA                 | NA             | NA             | NA       |
| 147457 | 5   | 129521471 | 129521471 | G         | A       | CHSY3           | missense                    | c.2636          | p.R879Q           | tier1 | 20992              | 3037                 | 3009             | 28               | 0.009      | 29467               | 3080                  | 2128              | 946               | 0.308       | NA              | NA                | NA            | NA            | NA      | 74738           | 397               | 396           | 0             | 0.000   | NA               | NA                 | NA             | NA             | NA       |
| 147457 | 5   | 140308059 | 140308059 | C         | T       | PCDHAC1         | missense                    | c.1582          | p.R528W           | tier1 | 6970               | 635                  | 624              | 10               | 0.016      | 15984               | 2042                  | 1421              | 617               | 0.303       | NA              | NA                | NA            | NA            | NA      | 25924           | 136               | 136           | 0             | 0.000   | NA               | NA                 | NA             | NA             | NA       |
| 147457 | 5   | 140751057 | 140751057 | G         | A       | PCDHGB3         | missense                    | c.1096          | p.V366I           | tier1 | 8638               | 2079                 | 2062             | 15               | 0.007      | 14673               | 2882                  | 2012              | 864               | 0.300       | NA              | NA                | NA            | NA            | NA      | 11893           | 154               | 154           | 0             | 0.000   | NA               | NA                 | NA             | NA             | NA       |
| 147457 | 5   | 145610359 | 145610359 | C         | T       | RBM27           | silent                      | c.729           | p.I243            | tier1 | 64532              | 7397                 | 7324             | 63               | 0.009      | 54129               | 4069                  | 3128              | 921               | 0.227       | NA              | NA                | NA            | NA            | NA      | 293020          | 1215              | 1207          | 4             | 0.000   | NA               | NA                 | NA             | NA             | NA       |
| 147457 | 5   | 146236055 | 146236055 | C         | T       | PPP2R2B         | splice_region               | c.37+7          | e1+7              | tier3 | 14142              | 1911                 | 1880             | 26               | 0.014      | 12947               | 1599                  | 1138              | 456               | 0.286       | NA              | NA                | NA            | NA            | NA      | 84759           | 354               | 350           | 1             | 0.000   | NA               | NA                 | NA             | NA             | NA       |
| 147457 | 5   | 147929769 | 147929769 | G         | A       | HTRA            | missense                    | c.83            | p.T28M            | tier1 | 26378              | 4464                 | 4435             | 27               | 0.006      | 28473               | 3328                  | 2600              | 719               | 0.217       | NA              | NA                | NA            | NA            | NA      | 93684           | 524               | 520           | 4             | 0.008   | NA               | NA                 | NA             | NA             | NA       |
| 147457 | 5   | 149584221 | 149584221 | C         | T       | SLC6A7          | intronic                    | c.1432+27       | e11+27            | tier3 | 48554              | 5469                 | 5434             | 33               | 0.006      | 27050               | 2421                  | 1948              | 470               | 0.194       | NA              | NA                | NA            | NA            | NA      | 244160          | 1102              | 1102          | 0             | 0.000   | NA               | NA                 | NA             | NA             | NA       |
| 147457 | 5   | 153434852 | 153434852 | C         | T       | MFAP3           | 3_prime_untranslated_region | c.*1579         | NULL              | tier3 | 7924               | 1862                 | 1841             | 16               | 0.009      | 14135               | 2844                  | 2136              | 699               | 0.247       | NA              | NA                | NA            | NA            | NA      | 15556           | 242               | 242           | 0             | 0.000   | NA               | NA                 | NA             | NA             | NA       |
| 147457 | 5   | 159665575 | 159665575 | G         | A       | FABP6           | intronic                    | c.481-38        | e6-38             | tier3 | 3160               | 438                  | 433              | 4                | 0.009      | 5099                | 602                   | 433               | 169               | 0.281       | NA              | NA                | NA            | NA            | NA      | 11801           | 57                | 57            | 0             | 0.000   | NA               | NA                 | NA             | NA             | NA       |
| 147457 | 5   | 173534383 | 173534383 | C         | T       | HMP19           | missense                    | c.391           | p.R131C           | tier1 | 41742              | 5492                 | 5454             | 28               | 0.005      | 45667               | 4730                  | 3448              | 1268              | 0.269       | NA              | NA                | NA            | NA            | NA      | 292563          | 1662              | 1656          | 5             | 0.000   | NA               | NA                 | NA             | NA             | NA       |
| 147457 | 5   | 176308809 | 176308809 | G         | A       | HK3             | silent                      | c.2277          | p.I759            | tier1 | 37127              | 4454                 | 4404             | 44               | 0.010      | 29955               | 2621                  | 1856              | 753               | 0.289       | NA              | NA                | NA            | NA            | NA      | 224006          | 899               | 890           | 4             | 0.004   | NA               | NA                 | NA             | NA             | NA       |
| 147457 | 6   | 3127540   | 3127540   | C         | T       | BPHL            | silent                      | c.276           | p.V92             | tier1 | 13044              | 1802                 | 1772             | 26               | 0.014      | 19683               | 2361                  | 1583              | 770               | 0.227       | NA              | NA                | NA            | NA            | NA      | 25878           | 400               | 397           | 0             | 0.000   | NA               | NA                 | NA             | NA             | NA       |
| 147457 | 6   | 25727357  | 25727357  | G         | A       | HIST1H2BA       | missense                    | c.221           | p.R74H            | tier1 | 14792              | 1833                 | 1813             | 17               | 0.009      | 19814               | 1607                  | 1139              | 466               | 0.290       | NA              | NA                | NA            | NA            | NA      | 56511           | 318               | 318           | 0             | 0.000   | NA               | NA                 | NA             | NA             | NA       |
| 147457 | 6   | 27217008  | 27217008  | C         | T       | PRSS16          | missense                    | c.467           | p.A156V           | tier1 | 23019              | 2712                 | 2696             | 15               | 0.006      | 23150               | 2008                  | 1579              | 421               | 0.211       | NA              | NA                | NA            | NA            | NA      | 153372          | 626               | 626           | 0             | 0.000   | NA               | NA                 | NA             | NA             | NA       |
| 147457 | 6   | 31913016  | 31913016  | G         | A       | C2              | missense                    | c.2141          | p.R714H           | tier1 | 19525              | 2823                 | 2787             | 34               | 0.012      | 29159               | 3121                  | 2181              | 932               | 0.299       | NA              | NA                | NA            | NA            | NA      | 100033          | 489               | 480           | 5             | 0.000   | NA               | NA                 | NA             | NA             | NA       |
| 147457 | 6   | 33554497  | 33554497  | C         | T       | GGNBP1          | missense                    | c.148           | p.R50C            | tier1 | 29872              | 3713                 | 3672             | 35               | 0.009      | 37994               | 3349                  | 2304              | 1027              | 0.308       | NA              | NA                | NA            | NA            | NA      | 122612          | 513               | 512           | 0             | 0.000   | NA               | NA                 | NA             | NA             | NA       |
| 147457 | 6   | 33990389  | 33990389  | C         | T       | GRM4            | 3_prime_untranslated_region | c.*209          | NULL              | tier3 | 27642              | 3366                 | 3335             | 26               | 0.008      | 19411               | 1722                  | 1180              | 539               | 0.314       | NA              | NA                | NA            | NA            | NA      | 205524          | 762               | 751           | 5             | 0.000   | NA               | NA                 | NA             | NA             | NA       |
| 147457 | 6   | 42985429  | 42985429  | C         | T       | KLHDC3          | missense                    | c.41            | p.T14M            | tier1 | 43747              | 5968                 | 5909             | 54               | 0.009      | 51510               | 5286                  | 3654              | 1608              | 0.306       | NA              | NA                | NA            | NA            | NA      | 163688          | 764               | 761           | 3             | 0.004   | NA               | NA                 | NA             | NA             | NA       |
| 147457 | 6   | 52522264  | 52522264  | C         | T       | TMEM14A         | 5_prime_flanking_region     | c.-19637        | NULL              | tier3 | 15182              | 1890                 | 1872             | 12               | 0.006      | 30946               | 2509                  | 2109              | 392               | 0.157       | NA              | NA                | NA            | NA            | NA      | 94944           | 690               | 677           | 7             | 0.010   | NA               | NA                 | NA             | NA             | NA       |
| 147457 | 6   | 55270421  | 55270421  | G         | A       | GFRAL           | 3_prime_flanking_region     | c.*3770         | NULL              | tier3 | 27260              | 3329                 | 3300             | 26               | 0.008      | 27849               | 2668                  | 1698              | 565               | 0.250       | NA              | NA                | NA            | NA            | NA      | 135270          | 550               | 550           | 0             | 0.000   | NA               | NA                 | NA             | NA             | NA       |
| 147457 | 6   | 105726111 | 105726111 | C         | T       | PRPF            | missense                    | c.2041          | p.G681R           | tier1 | 22255              | 2815                 | 2780             | 33               | 0.012      | 34450               | 3182                  | 2236              | 933               | 0.294       | NA              | NA                | NA            | NA            | NA      | 50811           | 292               | 292           | 0             | 0.000   | NA               | NA                 | NA             | NA             | NA       |
| 147457 | 6   | 108985689 | 108985689 | G         | A       | FOXO3           | silent                      | c.1653          | p.S551            | tier1 | 18776              | 2205                 | 2194             | 11               | 0.005      | 19185               | 1635                  | 1344              | 289               | 0.177       | NA              | NA                | NA            | NA            | NA      | 53710           | 394               | 394           | 0             | 0.000   | NA               | NA                 | NA             | NA             | NA       |
| 147457 | 6   | 136709445 | 136709445 | C         | T       | MAP7            | intronic                    | c.592+86        | e5+86             | tier3 | 15212              | 2356                 | 2341             | 7                | 0.003      | 16160               | 2179                  | 1732              | 435               | 0.201       | NA              | NA                | NA            | NA            | NA      | 111582          | 514               | 509           | 2             | 0.000   | NA               | NA                 | NA             | NA             | NA       |
| 147457 | 6   | 136944051 | 136944051 | G         | A       | MAP3K5          | silent                      | c.2085          | p.Y695            | tier1 | 9715               | 1825                 | 1813             | 10               | 0.005      | 14977               | 2452                  | 1768              | 677               | 0.277       | NA              | NA                | NA            | NA            | NA      | 23103           | 210               | 210           | 0             | 0.000   | NA               | NA                 | NA             | NA             | NA       |
| 147457 | 6   | 151672062 | 151672062 | G         | A       | AKAP12          | missense                    | c.2536          | p.V846M           | tier1 | 9376               | 1208                 | 1197             | 9                | 0.007      | 16711               | 1668                  | 1268              | 394               | 0.237       | NA              | NA                | NA            | NA            | NA      | 32831           | 197               | 197           | 0             | 0.000   | NA               | NA                 | NA             | NA             | NA       |
| 147457 | 6   | 157527582 | 157527582 | C         | T       | ARID1B          | silent                      | c.5427          | p.D1809           | tier1 | 6651               | 981                  | 966              | 13               | 0.013      | 10590               | 1189                  | 855               | 333               | 0.280       | NA              | NA                | NA            | NA            | NA      | 30684           | 153               | 153           | 0             | 0.000   | NA               | NA                 | NA             | NA             | NA       |
| 147457 | 6   | 157529705 | 157529705 | G         | A       | ARID18          | 3_prime_untranslated_region | c.*680          | NULL              | tier3 | 44344              | 5882                 | 5858             | 19               | 0.003      | 29280               | 3098                  | 2477              | 614               | 0.199       | NA              | NA                | NA            | NA            | NA      | 293392          | 1040              | 1040          | 0             | 0.000   | NA               | NA                 | NA             | NA             | NA       |
| 147457 | 6   | 160481709 | 160481709 | G         | A       | IGF2R           | silent                      | c.3222          | p.A107A           | tier1 | 57923              | 7512                 | 7427             | 82               | 0.011      | 53917               | 5179                  | 3685              | 1478              | 0.286       | NA              | NA                | NA            | NA            | NA      | 333617          | 1392              | 1388          | 4             | 0.003   | NA               | NA                 | NA             | NA             | NA       |
| 147457 | 6   | 170594817 | 170594817 | C         | T       | D               |                             |                 |                   |       |                    |                      |                  |                  |            |                     |                       |                   |                   |             |                 |                   |               |               |         |                 |                   |               |               |         |                  |                    |                |                |          |

| UPN    | Chr | Start     | Stop      | Reference | Variant | Gene Symbol     | Mutation Type               | Coding Position | Amino Acid Change | Tier  | Normal Total Count | Normal Unique Count* | Normal Ref Count | Normal Var Count | Normal VAF | Initial Total Count | Initial Unique Count* | Initial Ref Count | Initial Var Count | Initial VAF | Pre Total Count | Pre Unique Count* | Pre Ref Count | Pre Var Count | Pre VAF | D30 Total Count | D30 Unique Count* | D30 Ref Count | D30 Var Count | D30 VAF | D100 Total Count | D100 Unique Count* | D100 Ref Count | D100 Var Count | D100 VAF |
|--------|-----|-----------|-----------|-----------|---------|-----------------|-----------------------------|-----------------|-------------------|-------|--------------------|----------------------|------------------|------------------|------------|---------------------|-----------------------|-------------------|-------------------|-------------|-----------------|-------------------|---------------|---------------|---------|-----------------|-------------------|---------------|---------------|---------|------------------|--------------------|----------------|----------------|----------|
| 147457 | 9   | 116050499 | 116050499 | C         | T       | PRPF4           | missense                    | c.980           | p.A327V           | tier1 | 41232              | 4913                 | 4862             | 42               | 0.009      | 28328               | 2358                  | 1785              | 569               | 0.242       | NA              | NA                | NA            | NA            | NA      | 289464          | 1202              | 1198          | 2             | 0.000   | NA               | NA                 | NA             | NA             | NA       |
| 147457 | 9   | 117087344 | 117087344 | C         | T       | ORM1            | missense                    | c.452           | p.T151M           | tier1 | 43442              | 5148                 | 5102             | 40               | 0.008      | 45158               | 3364                  | 2337              | 1019              | 0.304       | NA              | NA                | NA            | NA            | NA      | 321610          | 1637              | 1632          | 4             | 0.002   | NA               | NA                 | NA             | NA             | NA       |
| 147457 | 9   | 117143546 | 117143546 | C         | T       | AKNA            | missense                    | c.68            | p.R23H            | tier1 | 25536              | 3062                 | 3042             | 20               | 0.007      | 21248               | 1684                  | 1201              | 479               | 0.285       | NA              | NA                | NA            | NA            | NA      | 100152          | 464               | 462           | 2             | 0.000   | NA               | NA                 | NA             | NA             | NA       |
| 147457 | 9   | 123370046 | 123370046 | C         | T       | MEGF9           | missense                    | c.1441          | p.D481N           | tier1 | 48167              | 6040                 | 5974             | 60               | 0.010      | 56049               | 4463                  | 3161              | 1287              | 0.289       | NA              | NA                | NA            | NA            | NA      | 458612          | 2039              | 2009          | 26            | 0.013   | NA               | NA                 | NA             | NA             | NA       |
| 147457 | 9   | 131394806 | 131394806 | G         | A       | SPTAN1          | intronic                    | c.7013+43       | e52+43            | tier3 | 21776              | 3028                 | 2987             | 36               | 0.012      | 25400               | 2621                  | 1827              | 783               | 0.300       | NA              | NA                | NA            | NA            | NA      | 109225          | 451               | 449           | 2             | 0.000   | NA               | NA                 | NA             | NA             | NA       |
| 147457 | 9   | 131893899 | 131893899 | G         | A       | PPP2R4          | silent                      | c.546           | p.T182            | tier1 | 36364              | 4427                 | 4364             | 57               | 0.013      | 43101               | 3550                  | 2453              | 1079              | 0.305       | NA              | NA                | NA            | NA            | NA      | 181531          | 921               | 914           | 6             | 0.007   | NA               | NA                 | NA             | NA             | NA       |
| 147457 | 9   | 139616703 | 139616703 | C         | T       | FAM69B          | missense                    | c.433           | p.R145W           | tier1 | 46754              | 5817                 | 5759             | 54               | 0.009      | 56331               | 4669                  | 3392              | 1261              | 0.271       | NA              | NA                | NA            | NA            | NA      | 276498          | 1161              | 1146          | 10            | 0.009   | NA               | NA                 | NA             | NA             | NA       |
| 147457 | 10  | 21827795  | 21827795  | C         | T       | MLL10           | missense                    | c.194           | p.P65L            | tier1 | 7289               | 1124                 | 1110             | 14               | 0.012      | 9731                | 1542                  | 1083              | 459               | 0.298       | NA              | NA                | NA            | NA            | NA      | 42645           | 199               | 199           | 0             | 0.000   | NA               | NA                 | NA             | NA             | NA       |
| 147457 | 10  | 25890983  | 25890983  | G         | A       | GPR158          | 3_prime_untranslated_region | c.*2780         | NULL              | tier2 | 13525              | 1967                 | 1954             | 9                | 0.005      | 19086               | 2231                  | 1525              | 704               | 0.316       | NA              | NA                | NA            | NA            | NA      | 49958           | 313               | 313           | 0             | 0.000   | NA               | NA                 | NA             | NA             | NA       |
| 147457 | 10  | 27048066  | 27048066  | G         | A       | ABI1            | nonsense                    | c.1006          | p.R336*           | tier1 | 30980              | 4260                 | 4208             | 51               | 0.012      | 39115               | 3912                  | 2803              | 1098              | 0.281       | NA              | NA                | NA            | NA            | NA      | 144662          | 759               | 758           | 0             | 0.000   | NA               | NA                 | NA             | NA             | NA       |
| 147457 | 10  | 28023604  | 28023604  | G         | A       | MXK             | missense                    | c.619           | p.R207W           | tier1 | 25388              | 3737                 | 3698             | 39               | 0.010      | 23584               | 2608                  | 1889              | 709               | 0.273       | NA              | NA                | NA            | NA            | NA      | 230541          | 986               | 976           | 9             | 0.009   | NA               | NA                 | NA             | NA             | NA       |
| 147457 | 10  | 29813480  | 29813480  | C         | T       | SVIL            | missense                    | c.2507          | p.R836Q           | tier1 | 28768              | 3511                 | 3456             | 50               | 0.014      | 28761               | 3325                  | 2225              | 1090              | 0.329       | NA              | NA                | NA            | NA            | NA      | 142275          | 604               | 604           | 0             | 0.000   | NA               | NA                 | NA             | NA             | NA       |
| 147457 | 10  | 30654823  | 30654823  | C         | T       | ENSG00000241621 | 5_prime_untranslated_region | c.-30654823     | NULL              | tier3 | 64504              | 7125                 | 7065             | 53               | 0.007      | 51786               | 3709                  | 2698              | 1002              | 0.271       | NA              | NA                | NA            | NA            | NA      | 700337          | 2714              | 2703          | 6             | 0.000   | NA               | NA                 | NA             | NA             | NA       |
| 147457 | 10  | 34671634  | 34671634  | C         | T       | PARD3           | silent                      | c.1233          | p.P411            | tier1 | 11500              | 2162                 | 2143             | 17               | 0.008      | 10021               | 1482                  | 1071              | 407               | 0.275       | NA              | NA                | NA            | NA            | NA      | 22089           | 180               | 177           | 3             | 0.017   | NA               | NA                 | NA             | NA             | NA       |
| 147457 | 10  | 46210567  | 46210567  | G         | A       | ENSG00000237840 | intronic                    | c.NULL          | NULL              | tier3 | 11019              | 1471                 | 1449             | 19               | 0.013      | 17159               | 1585                  | 1144              | 436               | 0.276       | NA              | NA                | NA            | NA            | NA      | 128881          | 549               | 544           | 4             | 0.000   | NA               | NA                 | NA             | NA             | NA       |
| 147457 | 10  | 47747160  | 47747160  | G         | A       | ENSG00000244599 | 3_prime_untranslated_region | c.*47747160     | NULL              | tier3 | 3978               | 970                  | 963              | 6                | 0.006      | 8468                | 1471                  | 1038              | 427               | 0.291       | NA              | NA                | NA            | NA            | NA      | 5260            | 56                | 56            | 0             | 0.000   | NA               | NA                 | NA             | NA             | NA       |
| 147457 | 10  | 64967543  | 64967543  | C         | T       | JMJD1C          | missense                    | c.3886          | p.G1296R          | tier1 | 14831              | 2382                 | 2356             | 23               | 0.010      | 22850               | 3087                  | 2166              | 912               | 0.296       | NA              | NA                | NA            | NA            | NA      | 42188           | 322               | 320           | 1             | 0.000   | NA               | NA                 | NA             | NA             | NA       |
| 147457 | 10  | 86004953  | 86004953  | C         | T       | RGR             | intronic                    | c.79+28         | e1+28             | tier3 | 45596              | 5198                 | 5142             | 51               | 0.010      | 44955               | 3371                  | 2361              | 1004              | 0.298       | NA              | NA                | NA            | NA            | NA      | 185736          | 888               | 878           | 4             | 0.000   | NA               | NA                 | NA             | NA             | NA       |
| 147457 | 10  | 87379729  | 87379729  | G         | A       | GRID1           | missense                    | c.2255          | p.T752M           | tier1 | 19872              | 2337                 | 2307             | 30               | 0.013      | 29761               | 2116                  | 1519              | 590               | 0.280       | NA              | NA                | NA            | NA            | NA      | 51666           | 289               | 282           | 6             | 0.021   | NA               | NA                 | NA             | NA             | NA       |
| 147457 | 10  | 100022513 | 100022513 | G         | A       | LOXL4           | silent                      | c.264           | p.Y88             | tier1 | 37675              | 4141                 | 4091             | 43               | 0.010      | 49311               | 3360                  | 2608              | 744               | 0.222       | NA              | NA                | NA            | NA            | NA      | 366339          | 1433              | 1433          | 0             | 0.000   | NA               | NA                 | NA             | NA             | NA       |
| 147457 | 10  | 103870964 | 103870964 | G         | A       | LDB1            | intronic                    | c.173+49        | e3+49             | tier3 | 1757               | 446                  | 438              | 6                | 0.014      | 3090                | 494                   | 338               | 155               | 0.314       | NA              | NA                | NA            | NA            | NA      | 3584            | 48                | 48            | 0             | 0.000   | NA               | NA                 | NA             | NA             | NA       |
| 147457 | 10  | 104245343 | 104245343 | C         | T       | ACTR1A          | intronic                    | c.440+23        | e5+23             | tier3 | 51377              | 6085                 | 6025             | 53               | 0.009      | 52683               | 4547                  | 3342              | 1183              | 0.261       | NA              | NA                | NA            | NA            | NA      | 326326          | 1340              | 1329          | 11            | 0.008   | NA               | NA                 | NA             | NA             | NA       |
| 147457 | 10  | 104628872 | 104628872 | C         | T       | C10orf32        | intronic                    | c.321-690       | e6-690            | tier4 | 17829              | 2892                 | 2865             | 24               | 0.008      | 20664               | 2389                  | 1688              | 694               | 0.291       | NA              | NA                | NA            | NA            | NA      | 84668           | 455               | 454           | 0             | 0.000   | NA               | NA                 | NA             | NA             | NA       |
| 147457 | 10  | 106160477 | 106160477 | C         | T       | CCDC147         | missense                    | c.1855          | p.R619W           | tier1 | 22373              | 3031                 | 2997             | 30               | 0.010      | 33327               | 3504                  | 2500              | 995               | 0.285       | NA              | NA                | NA            | NA            | NA      | 98505           | 490               | 490           | 0             | 0.000   | NA               | NA                 | NA             | NA             | NA       |
| 147457 | 10  | 116008560 | 116008560 | C         | T       | VWAZ            | intronic                    | c.52+36         | e1+36             | tier3 | 6753               | 1120                 | 1109             | 10               | 0.009      | 12508               | 1762                  | 1266              | 490               | 0.279       | NA              | NA                | NA            | NA            | NA      | 17474           | 125               | 125           | 0             | 0.000   | NA               | NA                 | NA             | NA             | NA       |
| 147457 | 10  | 118969094 | 118969094 | G         | A       | KCNK18          | missense                    | c.439           | p.V147I           | tier1 | 2666               | 631                  | 627              | 4                | 0.006      | 5543                | 1106                  | 792               | 311               | 0.282       | NA              | NA                | NA            | NA            | NA      | 3206            | 54                | 54            | 0             | 0.000   | NA               | NA                 | NA             | NA             | NA       |
| 147457 | 10  | 123976222 | 123976222 | G         | A       | TACC2           | silent                      | c.7425          | p.A247S           | tier1 | 78841              | 7991                 | 7897             | 87               | 0.011      | 63935               | 3972                  | 2763              | 1196              | 0.302       | NA              | NA                | NA            | NA            | NA      | 624264          | 2450              | 2405          | 36            | 0.015   | NA               | NA                 | NA             | NA             | NA       |
| 147457 | 10  | 124402685 | 124402685 | G         | A       | DMBT1           | missense                    | c.7400          | p.R2467H          | tier1 | 34281              | 4393                 | 4356             | 34               | 0.008      | 44382               | 4010                  | 2919              | 1079              | 0.270       | NA              | NA                | NA            | NA            | NA      | 204867          | 908               | 907           | 1             | 0.000   | NA               | NA                 | NA             | NA             | NA       |
| 147457 | 10  | 135011989 | 135011989 | C         | T       | KNDC1           | silent                      | c.2055          | p.N685            | tier1 | 27057              | 3060                 | 3036             | 24               | 0.008      | 28776               | 2078                  | 1584              | 492               | 0.237       | NA              | NA                | NA            | NA            | NA      | 156800          | 712               | 704           | 6             | 0.008   | NA               | NA                 | NA             | NA             | NA       |
| 147457 | 11  | 1316941   | 1316941   | C         | T       | TOLLIP          | silent                      | c.117           | p.A39             | tier1 | 50306              | 6544                 | 6491             | 49               | 0.007      | 39252               | 3768                  | 2776              | 983               | 0.262       | NA              | NA                | NA            | NA            | NA      | 220882          | 846               | 841           | 2             | 0.000   | NA               | NA                 | NA             | NA             | NA       |
| 147457 | 11  | 6048700   | 6048700   | C         | T       | OR56A1          | missense                    | c.235           | p.V79M            | tier1 | 29802              | 3684                 | 3637             | 43               | 0.012      | 34623               | 2788                  | 1947              | 830               | 0.299       | NA              | NA                | NA            | NA            | NA      | 232288          | 963               | 949           | 14            | 0.015   | NA               | NA                 | NA             | NA             | NA       |
| 147457 | 11  | 6232207   | 6232207   | G         | A       | C11orf42        | missense                    | c.937           | p.D313N           | tier1 | 22205              | 3081                 | 3046             | 31               | 0.010      | 33765               | 3860                  | 2727              | 1117              | 0.291       | NA              | NA                | NA            | NA            | NA      | 153786          | 771               | 770           | 1             | 0.000   | NA               | NA                 | NA             | NA             | NA       |
| 147457 | 11  | 10500213  | 10500213  | C         | T       | AMPD3           | missense                    | c.362           | p.T121M           | tier1 | 24495              | 3140                 | 3106             | 33               | 0.011      | 28673               | 2613                  | 1799              | 805               | 0.309       | NA              | NA                | NA            | NA            | NA      | 68968           | 442               | 438           | 4             | 0.000   | NA               | NA                 | NA             | NA             | NA       |
| 147457 | 11  | 16823374  | 16823374  | G         | A       | PLEKHA7         | splice_region               | c.2158-10       | e16-10            | tier3 | 54269              | 6564                 | 6457             | 75               | 0.011      | 83499               | 6625                  | 4752              | 1842              | 0.279       | NA              | NA                | NA            | NA            | NA      | 518776          | 2490              | 2478          | 8             | 0.003   | NA               | NA                 | NA             | NA             | NA       |
| 147457 | 11  | 17659970  | 17659970  | C         | T       | OTOA            | intronic                    | c.7832-28       | e47-28            | tier3 | 24964              | 3796                 | 3751             | 42               | 0.011      | 39494               | 4142                  | 2869              | 1259              | 0.305       | NA              | NA                | NA            | NA            | NA      | 85212           | 505               | 505           | 0             | 0.000   | NA               | NA                 | NA             | NA             | NA       |
| 147457 | 11  | 17801160  | 17801160  | C         | T       | KCNK1           | silent                      | c.1662          | p.Y554            | tier1 | 45883              | 5356                 | 5290             | 61               | 0.011      | 28596               | 2556                  | 1800              | 747               | 0.293       | NA              | NA                | NA            | NA            | NA      | 249496          | 1005              | 1000          | 2             | 0.000   | NA               | NA                 | NA             | NA             | NA</     |

| UPN    | Chr | Start     | Stop      | Reference | Variant | Gene Symbol     | Mutation Type               | Coding Position | Amino Acid Change | Tier  | Normal Total Count | Normal Unique Count* | Normal Ref Count | Normal Var Count | Normal VAF | Initial Total Count | Initial Unique Count* | Initial Ref Count | Initial Var Count | Initial VAF | Pre Total Count | Pre Unique Count* | Pre Ref Count | Pre Var Count | Pre VAF | D30 Total Count | D30 Unique Count* | D30 Ref Count | D30 Var Count | D30 VAF | D100 Total Count | D100 Unique Count* | D100 Ref Count | D100 Var Count | D100 VAF |
|--------|-----|-----------|-----------|-----------|---------|-----------------|-----------------------------|-----------------|-------------------|-------|--------------------|----------------------|------------------|------------------|------------|---------------------|-----------------------|-------------------|-------------------|-------------|-----------------|-------------------|---------------|---------------|---------|-----------------|-------------------|---------------|---------------|---------|------------------|--------------------|----------------|----------------|----------|
| 147457 | 12  | 123201344 | 123201344 | G         | A       | HCAR3           | 5_prime_untranslated_region | c.-60           | NULL              | tier3 | 602                | 115                  | 115              | 0                | 0.000      | 991                 | 231                   | 168               | 63                | 0.273       | NA              | NA                | NA            | NA            | NA      | 1932            | 27                | 27            | 0             | 0.000   | NA               | NA                 | NA             | NA             | NA       |
| 147457 | 12  | 124175149 | 124175149 | G         | A       | TCTN2           | missense                    | c.961           | p.V321I           | tier1 | 20603              | 2953                 | 2938             | 13               | 0.004      | 21561               | 2690                  | 2187              | 493               | 0.184       | NA              | NA                | NA            | NA            | NA      | 116220          | 518               | 512           | 5             | 0.010   | NA               | NA                 | NA             | NA             | NA       |
| 147457 | 12  | 124422048 | 124422048 | C         | T       | CDC92           | missense                    | c.553           | p.V185M           | tier1 | 37792              | 4600                 | 4553             | 44               | 0.010      | 37393               | 3037                  | 2219              | 811               | 0.268       | NA              | NA                | NA            | NA            | NA      | 236682          | 1101              | 1092          | 7             | 0.006   | NA               | NA                 | NA             | NA             | NA       |
| 147457 | 12  | 131498748 | 131498748 | G         | A       | GPR133          | missense                    | c.1336          | p.A446T           | tier1 | 28429              | 3454                 | 3433             | 21               | 0.006      | 33326               | 3258                  | 2562              | 688               | 0.212       | NA              | NA                | NA            | NA            | NA      | 204438          | 786               | 773           | 8             | 0.010   | NA               | NA                 | NA             | NA             | NA       |
| 147457 | 13  | 21562125  | 21562125  | C         | T       | LATS2           | silent                      | c.1794          | p.S598            | tier1 | 42168              | 6122                 | 6054             | 62               | 0.010      | 55136               | 5267                  | 3828              | 1417              | 0.270       | NA              | NA                | NA            | NA            | NA      | 236772          | 1173              | 1172          | 0             | 0.000   | NA               | NA                 | NA             | NA             | NA       |
| 147457 | 13  | 23928871  | 23928871  | G         | A       | SACS            | missense                    | c.1880          | p.T627M           | tier1 | 28547              | 3238                 | 3203             | 35               | 0.011      | 55441               | 3717                  | 2559              | 1150              | 0.310       | NA              | NA                | NA            | NA            | NA      | 356541          | 1497              | 1494          | 2             | 0.000   | NA               | NA                 | NA             | NA             | NA       |
| 147457 | 13  | 24410420  | 24410420  | G         | A       | MIPEP           | nonsense                    | c.1612          | p.R538*           | tier1 | 17591              | 2092                 | 2070             | 16               | 0.008      | 13194               | 1411                  | 1088              | 319               | 0.227       | NA              | NA                | NA            | NA            | NA      | 128482          | 562               | 553           | 7             | 0.013   | NA               | NA                 | NA             | NA             | NA       |
| 147457 | 13  | 39450219  | 39450219  | G         | A       | FREM2           | missense                    | c.8342          | p.R2781H          | tier1 | 56370              | 6018                 | 5976             | 38               | 0.006      | 53571               | 3379                  | 2385              | 982               | 0.292       | NA              | NA                | NA            | NA            | NA      | 341187          | 1499              | 1473          | 20            | 0.013   | NA               | NA                 | NA             | NA             | NA       |
| 147457 | 13  | 45857726  | 45857726  | C         | T       | GT2F2           | 3_prime_untranslated_region | c.*30           | NULL              | tier3 | 10482              | 1435                 | 1417             | 16               | 0.011      | 18585               | 2325                  | 1580              | 738               | 0.318       | NA              | NA                | NA            | NA            | NA      | 37285           | 287               | 287           | 0             | 0.000   | NA               | NA                 | NA             | NA             | NA       |
| 147457 | 13  | 95118904  | 95118904  | G         | A       | DC7             | missense                    | c.604           | p.R202C           | tier1 | 24558              | 3082                 | 3055             | 26               | 0.008      | 19234               | 1790                  | 1347              | 438               | 0.245       | NA              | NA                | NA            | NA            | NA      | 267773          | 950               | 933           | 11            | 0.012   | NA               | NA                 | NA             | NA             | NA       |
| 147457 | 13  | 111329450 | 111329450 | G         | A       | CARS2           | missense                    | c.656           | p.A219V           | tier1 | 23587              | 3509                 | 3489             | 19               | 0.005      | 39503               | 3377                  | 2638              | 733               | 0.217       | NA              | NA                | NA            | NA            | NA      | 271081          | 1204              | 1199          | 2             | 0.000   | NA               | NA                 | NA             | NA             | NA       |
| 147457 | 13  | 113838700 | 113838700 | G         | A       | PCID2           | silent                      | c.807           | p.Y269I           | tier1 | 18347              | 2497                 | 2466             | 28               | 0.011      | 22041               | 2449                  | 1688              | 751               | 0.308       | NA              | NA                | NA            | NA            | NA      | 88239           | 440               | 431           | 7             | 0.016   | NA               | NA                 | NA             | NA             | NA       |
| 147457 | 14  | 21552150  | 21552150  | C         | T       | ARHGGEF40       | missense                    | c.3730          | p.R1244W          | tier1 | 53336              | 6562                 | 6516             | 44               | 0.007      | 33253               | 2855                  | 2223              | 624               | 0.219       | NA              | NA                | NA            | NA            | NA      | 537389          | 2063              | 2040          | 11            | 0.005   | NA               | NA                 | NA             | NA             | NA       |
| 147457 | 14  | 21861926  | 21861926  | C         | T       | CHD8            | missense                    | c.6028          | p.E2010K          | tier1 | 51044              | 5879                 | 5834             | 42               | 0.007      | 52833               | 3891                  | 3029              | 852               | 0.220       | NA              | NA                | NA            | NA            | NA      | 369809          | 1535              | 1515          | 12            | 0.008   | NA               | NA                 | NA             | NA             | NA       |
| 147457 | 14  | 38261600  | 38261600  | G         | A       | TTC6            | missense                    | c.3689          | p.R1230Q          | tier1 | 13147              | 1634                 | 1613             | 20               | 0.012      | 11439               | 1085                  | 757               | 324               | 0.300       | NA              | NA                | NA            | NA            | NA      | 86742           | 327               | 323           | 4             | 0.012   | NA               | NA                 | NA             | NA             | NA       |
| 147457 | 14  | 45664649  | 45664649  | G         | A       | FANCM           | intronic                    | c.5341-726      | e21-726           | tier3 | 6493               | 1025                 | 1013             | 5                | 0.005      | 7469                | 1293                  | 955               | 334               | 0.259       | NA              | NA                | NA            | NA            | NA      | 41637           | 242               | 235           | 5             | 0.021   | NA               | NA                 | NA             | NA             | NA       |
| 147457 | 14  | 52471285  | 52471285  | C         | T       | C14orf166       | 3_prime_untranslated_region | c.*51           | NULL              | tier3 | 31774              | 3449                 | 3414             | 33               | 0.010      | 41248               | 2746                  | 1943              | 794               | 0.290       | NA              | NA                | NA            | NA            | NA      | 191435          | 811               | 808           | 0             | 0.000   | NA               | NA                 | NA             | NA             | NA       |
| 147457 | 14  | 57713531  | 57713531  | C         | T       | EXOC5           | missense                    | c.168           | p.M56I            | tier1 | 12407              | 1685                 | 1663             | 19               | 0.011      | 16095               | 1998                  | 1443              | 551               | 0.276       | NA              | NA                | NA            | NA            | NA      | 60344           | 299               | 299           | 0             | 0.000   | NA               | NA                 | NA             | NA             | NA       |
| 147457 | 14  | 68047847  | 68047847  | G         | A       | PLEKHH1         | intronic                    | c.3284+92       | e22+92            | tier3 | 55976              | 6306                 | 6230             | 71               | 0.011      | 61545               | 4371                  | 3135              | 1225              | 0.281       | NA              | NA                | NA            | NA            | NA      | 433248          | 1975              | 1959          | 15            | 0.008   | NA               | NA                 | NA             | NA             | NA       |
| 147457 | 14  | 76259462  | 76259462  | G         | A       | TTL5            | intronic                    | c.3171+19       | e26+19            | tier3 | 42262              | 4989                 | 4948             | 37               | 0.007      | 41206               | 3264                  | 2439              | 814               | 0.250       | NA              | NA                | NA            | NA            | NA      | 321279          | 1389              | 1380          | 6             | 0.004   | NA               | NA                 | NA             | NA             | NA       |
| 147457 | 14  | 91211188  | 91211188  | C         | T       | TTC7B           | missense                    | c.524           | p.C175Y           | tier1 | 4775               | 584                  | 574              | 8                | 0.014      | 7167                | 818                   | 581               | 234               | 0.287       | NA              | NA                | NA            | NA            | NA      | 12924           | 76                | 72            | 4             | 0.000   | NA               | NA                 | NA             | NA             | NA       |
| 147457 | 14  | 91700696  | 91700696  | G         | A       | GPR68           | silent                      | c.729           | p.T243            | tier1 | 16166              | 2906                 | 2875             | 27               | 0.009      | 27269               | 3480                  | 2500              | 969               | 0.279       | NA              | NA                | NA            | NA            | NA      | 31381           | 206               | 206           | 0             | 0.000   | NA               | NA                 | NA             | NA             | NA       |
| 147457 | 14  | 93706769  | 93706769  | G         | A       | BTBD7           | 3_prime_untranslated_region | c.*1850         | NULL              | tier2 | 20889              | 3634                 | 3629             | 4                | 0.001      | 30925               | 4724                  | 4371              | 344               | 0.073       | NA              | NA                | NA            | NA            | NA      | 77610           | 543               | 543           | 0             | 0.000   | NA               | NA                 | NA             | NA             | NA       |
| 147457 | 14  | 102801015 | 102801015 | G         | A       | ZNF839          | intronic                    | c.1509+32       | e4+32             | tier3 | 3908               | 447                  | 441              | 6                | 0.013      | 5131                | 700                   | 484               | 211               | 0.304       | NA              | NA                | NA            | NA            | NA      | 31345           | 165               | 164           | 0             | 0.000   | NA               | NA                 | NA             | NA             | NA       |
| 147457 | 14  | 105419206 | 105419206 | G         | A       | AHNAK2          | missense                    | c.2582          | p.P861L           | tier1 | 95151              | 10551                | 10435            | 84               | 0.008      | 67942               | 4996                  | 3922              | 1058              | 0.212       | NA              | NA                | NA            | NA            | NA      | 649421          | 2498              | 2456          | 30            | 0.012   | NA               | NA                 | NA             | NA             | NA       |
| 147457 | 15  | 23313159  | 23313159  | G         | A       | HERC2P2         | 5_prime_untranslated_region | c.-23313159     | NULL              | tier2 | 10419              | 1202                 | 1188             | 12               | 0.010      | 9851                | 1031                  | 739               | 291               | 0.283       | NA              | NA                | NA            | NA            | NA      | 59430           | 252               | 251           | 0             | 0.000   | NA               | NA                 | NA             | NA             | NA       |
| 147457 | 15  | 25349836  | 25349836  | C         | T       | SNORD116-28     | rna                         | NULL            | NULL              | tier1 | 14452              | 2046                 | 2022             | 23               | 0.011      | 26056               | 2703                  | 1904              | 791               | 0.294       | NA              | NA                | NA            | NA            | NA      | 90007           | 468               | 457           | 9             | 0.019   | NA               | NA                 | NA             | NA             | NA       |
| 147457 | 15  | 28517461  | 28517461  | C         | T       | HERC2           | missense                    | c.983           | p.R328H           | tier1 | 34159              | 3813                 | 3791             | 18               | 0.005      | 49992               | 3031                  | 2665              | 360               | 0.119       | NA              | NA                | NA            | NA            | NA      | 117607          | 580               | 570           | 6             | 0.010   | NA               | NA                 | NA             | NA             | NA       |
| 147457 | 15  | 33936693  | 33936693  | C         | T       | RYR3            | silent                      | c.3738          | p.N1246           | tier1 | 16350              | 2252                 | 2241             | 11               | 0.005      | 25093               | 2819                  | 1995              | 810               | 0.289       | NA              | NA                | NA            | NA            | NA      | 52243           | 342               | 342           | 0             | 0.000   | NA               | NA                 | NA             | NA             | NA       |
| 147457 | 15  | 40099429  | 40099429  | C         | T       | GPR176          | missense                    | c.203           | p.R68H            | tier1 | 5650               | 698                  | 697              | 1                | 0.001      | 2937                | 311                   | 260               | 51                | 0.164       | NA              | NA                | NA            | NA            | NA      | 36078           | 141               | 140           | 1             | 0.000   | NA               | NA                 | NA             | NA             | NA       |
| 147457 | 15  | 40532849  | 40532849  | C         | T       | ENSG00000259288 | missense                    | c.131           | p.T44M            | tier1 | 12911              | 1449                 | 1446             | 3                | 0.002      | 15680               | 1124                  | 1064              | 60                | 0.053       | NA              | NA                | NA            | NA            | NA      | 142267          | 730               | 729           | 1             | 0.000   | NA               | NA                 | NA             | NA             | NA       |
| 147457 | 15  | 40583762  | 40583762  | C         | T       | PLCB2           | 3_prime_untranslated_region | c.*205          | NULL              | tier2 | 31095              | 4688                 | 4604             | 81               | 0.017      | 41254               | 4079                  | 2789              | 1268              | 0.313       | NA              | NA                | NA            | NA            | NA      | 238420          | 1788              | 1780          | 6             | 0.000   | NA               | NA                 | NA             | NA             | NA       |
| 147457 | 15  | 44673070  | 44673070  | G         | A       | CASC4           | missense                    | c.968           | p.R323H           | tier1 | 38594              | 4678                 | 4650             | 28               | 0.006      | 25298               | 2118                  | 1740              | 374               | 0.177       | NA              | NA                | NA            | NA            | NA      | 371329          | 1453              | 1448          | 4             | 0.003   | NA               | NA                 | NA             | NA             | NA       |
| 147457 | 15  | 52622645  | 52622645  | C         | T       | MYO5A           | missense                    | c.4460          | p.R1487Q          | tier1 | 46289              | 5046                 | 5014             | 32               | 0.006      | 33849               | 2611                  | 1936              | 671               | 0.257       | NA              | NA                | NA            | NA            | NA      | 352307          | 1397              | 1384          | 13            | 0.009   | NA               | NA                 | NA             | NA             | NA       |
| 147457 | 15  | 63964722  | 63964722  | G         | A       | HERC1           | missense                    | c.8018          | p.P2673L          | tier1 | 25385              | 3203                 | 3190             | 12               | 0.004      | 44121               | 3995                  | 2987              | 996               | 0.250       | NA              | NA                | NA            | NA            | NA      | 224348          | 1001              | 1001          | 0             | 0.000   | NA               | NA                 | NA             | NA             | NA       |
| 147457 | 15  | 66181422  | 66181422  | C         | T       | RAB11A          | 3_prime_untranslated_region | c.*1244         | NULL              | tier3 | 20600              | 3162                 | 3142             | 16               | 0.005      | 17204               | 2414                  | 1938              | 474               | 0.197       | NA              | NA                | NA            | NA            | NA      | 239065          | 910               | 910           | 0             | 0.000   | NA               | NA                 | NA             | NA             | NA       |
| 147457 | 15  |           |           |           |         |                 |                             |                 |                   |       |                    |                      |                  |                  |            |                     |                       |                   |                   |             |                 |                   |               |               |         |                 |                   |               |               |         |                  |                    |                |                |          |



| UPN    | Chr | Start    | Stop     | Reference | Variant | Gene Symbol     | Mutation Type               | Coding Position | Amino Acid Change | Tier  | Normal Total Count | Normal Unique Count* | Normal Ref Count | Normal Var Count | Normal VAF | Initial Total Count | Initial Unique Count* | Initial Ref Count | Initial Var Count | Initial VAF | Pre Total Count | Pre Unique Count* | Pre Ref Count | Pre Var Count | Pre VAF | D30 Total Count | D30 Unique Count* | D30 Ref Count | D30 Var Count | D30 VAF | D100 Total Count | D100 Unique Count* | D100 Ref Count | D100 Var Count | D100 VAF |
|--------|-----|----------|----------|-----------|---------|-----------------|-----------------------------|-----------------|-------------------|-------|--------------------|----------------------|------------------|------------------|------------|---------------------|-----------------------|-------------------|-------------------|-------------|-----------------|-------------------|---------------|---------------|---------|-----------------|-------------------|---------------|---------------|---------|------------------|--------------------|----------------|----------------|----------|
| 147457 | 17  | 38146349 | 38146349 | C         | T       | PSMD3           | nonsense                    | c.880           | p.R294*           | tier1 | 15821              | 1944                 | 1926             | 16               | 0.008      | 19025               | 1675                  | 1172              | 494               | 0.297       | NA              | NA                | NA            | NA            | NA      | 60870           | 367               | 365           | 0             | 0.000   | NA               | NA                 | NA             | NA             | NA       |
| 147457 | 17  | 39740595 | 39740595 | C         | T       | KRT14           | missense                    | c.679           | p.E227K           | tier1 | 12535              | 1278                 | 1268             | 8                | 0.006      | 31582               | 1908                  | 1363              | 538               | 0.283       | NA              | NA                | NA            | NA            | NA      | 436058          | 1697              | 1666          | 12            | 0.007   | NA               | NA                 | NA             | NA             | NA       |
| 147457 | 17  | 40063711 | 40063711 | C         | T       | ACLY            | missense                    | c.893           | p.R298Q           | tier1 | 23162              | 2794                 | 2766             | 26               | 0.009      | 26911               | 2118                  | 1442              | 672               | 0.318       | NA              | NA                | NA            | NA            | NA      | 124013          | 539               | 539           | 0             | 0.000   | NA               | NA                 | NA             | NA             | NA       |
| 147457 | 17  | 41026210 | 41026210 | C         | T       | ENSG00000260105 | 3_prime_untranslated_region | c.*41026210     | NULL              | tier2 | 1422               | 359                  | 356              | 3                | 0.008      | 4299                | 654                   | 457               | 196               | 0.300       | NA              | NA                | NA            | NA            | NA      | 5356            | 61                | 61            | 0             | 0.000   | NA               | NA                 | NA             | NA             | NA       |
| 147457 | 17  | 44144025 | 44144025 | G         | A       | KANSL1          | nonsense                    | c.1726          | p.R576*           | tier1 | 35110              | 3766                 | 3729             | 37               | 0.010      | 42552               | 2795                  | 1981              | 808               | 0.290       | NA              | NA                | NA            | NA            | NA      | 375355          | 1418              | 1413          | 2             | 0.000   | NA               | NA                 | NA             | NA             | NA       |
| 147457 | 17  | 48434597 | 48434597 | G         | A       | XYLT2           | missense                    | c.1925          | p.R642Q           | tier1 | 19353              | 2525                 | 2506             | 17               | 0.007      | 46569               | 3984                  | 3073              | 905               | 0.228       | NA              | NA                | NA            | NA            | NA      | 178105          | 817               | 809           | 7             | 0.000   | NA               | NA                 | NA             | NA             | NA       |
| 147457 | 17  | 52993020 | 52993020 | C         | T       | TOM1L1          | intronic                    | c.604-87        | e7-87             | tier2 | 21550              | 2773                 | 2745             | 26               | 0.009      | 20172               | 1948                  | 1404              | 536               | 0.276       | NA              | NA                | NA            | NA            | NA      | 137545          | 687               | 682           | 1             | 0.000   | NA               | NA                 | NA             | NA             | NA       |
| 147457 | 17  | 56606542 | 56606542 | C         | T       | 43347           | 5_prime_untranslated_region | c.-7            | NULL              | tier2 | 17969              | 2205                 | 2189             | 14               | 0.006      | 18362               | 1795                  | 1240              | 549               | 0.307       | NA              | NA                | NA            | NA            | NA      | 171324          | 724               | 724           | 0             | 0.000   | NA               | NA                 | NA             | NA             | NA       |
| 147457 | 17  | 59668192 | 59668192 | G         | A       | NACA2           | missense                    | c.350           | p.S117L           | tier1 | 14123              | 1670                 | 1661             | 8                | 0.005      | 14304               | 1283                  | 1006              | 274               | 0.214       | NA              | NA                | NA            | NA            | NA      | 96326           | 548               | 544           | 3             | 0.005   | NA               | NA                 | NA             | NA             | NA       |
| 147457 | 17  | 60754754 | 60754754 | G         | A       | MRC2            | silent                      | c.1959          | p.T653            | tier1 | 30319              | 3746                 | 3700             | 42               | 0.011      | 27678               | 2592                  | 1859              | 723               | 0.280       | NA              | NA                | NA            | NA            | NA      | 381542          | 1304              | 1285          | 10            | 0.000   | NA               | NA                 | NA             | NA             | NA       |
| 147457 | 17  | 61611215 | 61611215 | C         | T       | KCNH6           | intronic                    | c.676-32        | e5-32             | tier2 | 18072              | 3168                 | 3132             | 36               | 0.011      | 30425               | 3932                  | 2680              | 1240              | 0.316       | NA              | NA                | NA            | NA            | NA      | 17372           | 175               | 175           | 0             | 0.000   | NA               | NA                 | NA             | NA             | NA       |
| 147457 | 17  | 64873540 | 64873540 | C         | T       | CACNG5          | silent                      | c.90            | p.T30             | tier1 | 37343              | 4442                 | 4400             | 39               | 0.009      | 41951               | 3026                  | 2150              | 867               | 0.287       | NA              | NA                | NA            | NA            | NA      | 138308          | 761               | 745           | 16            | 0.021   | NA               | NA                 | NA             | NA             | NA       |
| 147457 | 17  | 74900341 | 74900341 | G         | A       | MGAT5B          | missense                    | c.560           | p.R187H           | tier1 | 40682              | 5669                 | 5644             | 21               | 0.004      | 33268               | 3488                  | 2977              | 709               | 0.192       | NA              | NA                | NA            | NA            | NA      | 320545          | 1296              | 1296          | 0             | 0.000   | NA               | NA                 | NA             | NA             | NA       |
| 147457 | 17  | 76167847 | 76167847 | C         | T       | SYNGR2          | missense                    | c.505           | p.R169C           | tier1 | 32825              | 3983                 | 3945             | 35               | 0.009      | 34027               | 2940                  | 2163              | 769               | 0.262       | NA              | NA                | NA            | NA            | NA      | 216621          | 937               | 919           | 16            | 0.017   | NA               | NA                 | NA             | NA             | NA       |
| 147457 | 17  | 76803689 | 76803689 | C         | T       | USP36           | silent                      | c.1437          | p.P479            | tier1 | 10289              | 1675                 | 1653             | 20               | 0.012      | 14710               | 1628                  | 1139              | 489               | 0.300       | NA              | NA                | NA            | NA            | NA      | 34702           | 197               | 197           | 0             | 0.000   | NA               | NA                 | NA             | NA             | NA       |
| 147457 | 17  | 77081692 | 77081692 | C         | T       | ENGASE          | splice_region               | c.1701-10       | e13-10            | tier3 | 35488              | 4166                 | 4123             | 38               | 0.009      | 30387               | 2481                  | 1844              | 631               | 0.255       | NA              | NA                | NA            | NA            | NA      | 195147          | 883               | 881           | 0             | 0.000   | NA               | NA                 | NA             | NA             | NA       |
| 147457 | 17  | 77083117 | 77083117 | G         | A       | ENGASE          | 3_prime_untranslated_region | c.*686          | NULL              | tier3 | 37228              | 4808                 | 4758             | 47               | 0.010      | 38239               | 3488                  | 2378              | 1096              | 0.315       | NA              | NA                | NA            | NA            | NA      | 185511          | 842               | 824           | 17            | 0.020   | NA               | NA                 | NA             | NA             | NA       |
| 147457 | 17  | 78247071 | 78247071 | G         | A       | RNF213          | silent                      | c.129           | p.S43             | tier1 | 19809              | 2110                 | 2092             | 17               | 0.008      | 15825               | 1260                  | 971               | 284               | 0.226       | NA              | NA                | NA            | NA            | NA      | 95659           | 421               | 417           | 3             | 0.000   | NA               | NA                 | NA             | NA             | NA       |
| 147457 | 18  | 5397381  | 5397381  | G         | A       | EPB41L3         | silent                      | c.2517          | p.P839            | tier1 | 30093              | 3685                 | 3664             | 21               | 0.006      | 27923               | 2749                  | 2147              | 597               | 0.218       | NA              | NA                | NA            | NA            | NA      | 321328          | 1314              | 1313          | 1             | 0.000   | NA               | NA                 | NA             | NA             | NA       |
| 147457 | 18  | 6837314  | 6837314  | C         | T       | ARHGAP28        | silent                      | c.444           | p.A148            | tier1 | 29197              | 3249                 | 3249             | 17               | 0.005      | 20827               | 1396                  | 1152              | 241               | 0.173       | NA              | NA                | NA            | NA            | NA      | 169370          | 663               | 658           | 5             | 0.008   | NA               | NA                 | NA             | NA             | NA       |
| 147457 | 18  | 13072806 | 13072806 | C         | T       | CEP192          | nonsense                    | c.5401          | p.R1801*          | tier1 | 44687              | 5534                 | 5494             | 37               | 0.007      | 36812               | 3414                  | 2561              | 841               | 0.247       | NA              | NA                | NA            | NA            | NA      | 264181          | 1119              | 1119          | 0             | 0.000   | NA               | NA                 | NA             | NA             | NA       |
| 147457 | 18  | 19024347 | 19024347 | C         | T       | GREB1L          | missense                    | c.1370          | p.T457M           | tier1 | 12675              | 1867                 | 1849             | 18               | 0.010      | 20959               | 2736                  | 2049              | 680               | 0.249       | NA              | NA                | NA            | NA            | NA      | 104212          | 442               | 437           | 5             | 0.011   | NA               | NA                 | NA             | NA             | NA       |
| 147457 | 18  | 19780629 | 19780629 | C         | T       | GATA6           | missense                    | c.1370          | p.P544L           | tier1 | 18601              | 2243                 | 2220             | 23               | 0.010      | 17809               | 1436                  | 1015              | 417               | 0.291       | NA              | NA                | NA            | NA            | NA      | 92247           | 478               | 478           | 0             | 0.000   | NA               | NA                 | NA             | NA             | NA       |
| 147457 | 18  | 24126926 | 24126926 | G         | A       | KCTD1           | silent                      | c.1575          | p.D525            | tier1 | 23659              | 3227                 | 3201             | 24               | 0.007      | 16203               | 1472                  | 1164              | 302               | 0.206       | NA              | NA                | NA            | NA            | NA      | 200356          | 716               | 709           | 5             | 0.000   | NA               | NA                 | NA             | NA             | NA       |
| 147457 | 18  | 34340699 | 34340699 | C         | T       | FHOD3           | silent                      | c.A029          | p.D1343           | tier1 | 26245              | 2927                 | 2899             | 27               | 0.009      | 23979               | 2017                  | 1324              | 687               | 0.342       | NA              | NA                | NA            | NA            | NA      | 202310          | 811               | 800           | 10            | 0.012   | NA               | NA                 | NA             | NA             | NA       |
| 147457 | 18  | 47527556 | 47527556 | C         | T       | MYO5B           | intronic                    | c.612+69        | e5+69             | tier2 | 40300              | 4764                 | 4690             | 65               | 0.014      | 50113               | 4494                  | 3058              | 1412              | 0.316       | NA              | NA                | NA            | NA            | NA      | 291438          | 1179              | 1153          | 14            | 0.012   | NA               | NA                 | NA             | NA             | NA       |
| 147457 | 19  | 648900   | 648900   | C         | T       | RNF126          | missense                    | c.652           | p.V218I           | tier1 | 31606              | 3928                 | 3893             | 31               | 0.008      | 28990               | 2506                  | 1763              | 738               | 0.295       | NA              | NA                | NA            | NA            | NA      | 158706          | 694               | 680           | 10            | 0.014   | NA               | NA                 | NA             | NA             | NA       |
| 147457 | 19  | 806592   | 806592   | C         | T       | PTBP1           | intronic                    | c.1119+36       | e10+36            | tier2 | 21508              | 2823                 | 2798             | 21               | 0.007      | 21674               | 2125                  | 1472              | 651               | 0.307       | NA              | NA                | NA            | NA            | NA      | 62240           | 341               | 341           | 0             | 0.000   | NA               | NA                 | NA             | NA             | NA       |
| 147457 | 19  | 10462666 | 10462666 | G         | A       | ABCA7           | missense                    | c.1483          | p.D495N           | tier1 | 33339              | 3688                 | 3643             | 38               | 0.010      | 25302               | 1769                  | 1199              | 568               | 0.321       | NA              | NA                | NA            | NA            | NA      | 167520          | 673               | 666           | 7             | 0.010   | NA               | NA                 | NA             | NA             | NA       |
| 147457 | 19  | 3976654  | 3976654  | G         | A       | EEF2            | silent                      | c.2475          | p.F825            | tier1 | 33995              | 4940                 | 4882             | 52               | 0.011      | 41540               | 4404                  | 3006              | 1377              | 0.314       | NA              | NA                | NA            | NA            | NA      | 110150          | 630               | 626           | 4             | 0.006   | NA               | NA                 | NA             | NA             | NA       |
| 147457 | 19  | 4511513  | 4511513  | G         | A       | PLIN4           | missense                    | c.2417          | p.T806M           | tier1 | 10301              | 1067                 | 1066             | 1                | 0.001      | 25303               | 1776                  | 1715              | 60                | 0.034       | NA              | NA                | NA            | NA            | NA      | 530049          | 1684              | 1678          | 4             | 0.000   | NA               | NA                 | NA             | NA             | NA       |
| 147457 | 19  | 4930798  | 4930798  | C         | T       | UHRF1           | missense                    | c.518           | p.T173M           | tier1 | 31456              | 3133                 | 3095             | 35               | 0.011      | 50025               | 3203                  | 2266              | 931               | 0.291       | NA              | NA                | NA            | NA            | NA      | 390756          | 1523              | 1517          | 3             | 0.000   | NA               | NA                 | NA             | NA             | NA       |
| 147457 | 19  | 7267653  | 7267653  | C         | T       | INSR            | missense                    | c.355           | p.A119T           | tier1 | 49792              | 5721                 | 5642             | 76               | 0.013      | 40105               | 3725                  | 2635              | 1083              | 0.291       | NA              | NA                | NA            | NA            | NA      | 276016          | 1029              | 1020          | 9             | 0.009   | NA               | NA                 | NA             | NA             | NA       |
| 147457 | 19  | 7620282  | 7620282  | G         | A       | PNPLA6          | intronic                    | c.2966+29       | e24+29            | tier2 | 3735               | 398                  | 386              | 12               | 0.030      | 7418                | 967                   | 510               | 457               | 0.473       | NA              | NA                | NA            | NA            | NA      | 15629           | 104               | 102           | 2             | 0.000   | NA               | NA                 | NA             | NA             | NA       |
| 147457 | 19  | 8027941  | 8027941  | C         | T       | ELAVL1          | 3_prime_untranslated_region | c.*426          | NULL              | tier3 | 20071              | 2492                 | 2462             | 27               | 0.011      | 33174               | 2997                  | 2189              | 799               | 0.267       | NA              | NA                | NA            | NA            | NA      | 103429          | 541               | 541           | 0             | 0.000   | NA               | NA                 | NA             | NA             | NA       |
| 147457 | 19  | 8617070  | 8617070  | C         | T       | MYO1F           | intronic                    | c.505-22        | e7-22             | tier3 | 31249              | 3658                 | 3627             | 27               | 0.007      | 30018               | 2426                  | 1757              | 664               | 0.274       | NA              | NA                | NA            | NA            | NA      | 154879          | 643               | 643           | 0             | 0.000   | NA               | NA                 | NA             | NA             | NA       |
| 147457 | 19  | 10099957 | 10099957 |           |         |                 |                             |                 |                   |       |                    |                      |                  |                  |            |                     |                       |                   |                   |             |                 |                   |               |               |         |                 |                   |               |               |         |                  |                    |                |                |          |



| UPN    | Chr | Start     | Stop      | Reference | Variant | Gene Symbol     | Mutation Type               | Coding Position | Amino Acid Change | Tier  | Normal Total Count | Normal Unique Count* | Normal Ref Count | Normal Var Count | Normal VAF | Initial Total Count | Initial Unique Count* | Initial Ref Count | Initial Var Count | Initial VAF | Pre Total Count | Pre Unique Count* | Pre Ref Count | Pre Var Count | Pre VAF | D30 Total Count | D30 Unique Count* | D30 Ref Count | D30 Var Count | D30 VAF | D100 Total Count | D100 Unique Count* | D100 Ref Count | D100 Var Count | D100 VAF |    |
|--------|-----|-----------|-----------|-----------|---------|-----------------|-----------------------------|-----------------|-------------------|-------|--------------------|----------------------|------------------|------------------|------------|---------------------|-----------------------|-------------------|-------------------|-------------|-----------------|-------------------|---------------|---------------|---------|-----------------|-------------------|---------------|---------------|---------|------------------|--------------------|----------------|----------------|----------|----|
| 147457 | 21  | 43984766  | 43984766  | G         | A       | SLC37A1         | intronic                    | c.1136-52       | e13-52            | tier3 | 78694              | 8566                 | 8479             | 72               | 0.008      | 64098               | 4715                  | 3720              | 981               | 0.209       | NA              | NA                | NA            | NA            | NA      | 707573          | 2923              | 2911          | 4             | 0.000   | NA               | NA                 | NA             | NA             | NA       |    |
| 147457 | 21  | 46363698  | 46363698  | G         | A       | FAM207A         | missense                    | c.229           | p.V771            | tier1 | 16968              | 2090                 | 2071             | 16               | 0.008      | 20962               | 1807                  | 1262              | 540               | 0.300       | NA              | NA                | NA            | NA            | NA      | 41648           | 241               | 236           | 4             | 0.017   | NA               | NA                 | NA             | NA             | NA       |    |
| 147457 | 22  | 21349265  | 21349265  | G         | A       | LZTR1           | missense                    | c.1892          | p.R631Q           | tier1 | 13742              | 1710                 | 1691             | 16               | 0.009      | 18524               | 1659                  | 1164              | 493               | 0.298       | NA              | NA                | NA            | NA            | NA      | 42995           | 251               | 251           | 0             | 0.000   | NA               | NA                 | NA             | NA             | NA       |    |
| 147457 | 22  | 23077532  | 23077532  | C         | T       | IGLV2-18        | silent                      | c.309           | p.D103            | tier1 | 37981              | 5120                 | 5091             | 28               | 0.005      | 38538               | 3976                  | 2949              | 1016              | 0.256       | NA              | NA                | NA            | NA            | NA      | 246785          | 1093              | 1087          | 6             | 0.005   | NA               | NA                 | NA             | NA             | NA       |    |
| 147457 | 22  | 25598652  | 25598652  | C         | T       | CRYBB3          | silent                      | c.87            | p.Y29             | tier1 | 26233              | 3344                 | 3300             | 39               | 0.012      | 35699               | 3034                  | 2170              | 851               | 0.282       | NA              | NA                | NA            | NA            | NA      | 253231          | 1082              | 1067          | 7             | 0.007   | NA               | NA                 | NA             | NA             | NA       |    |
| 147457 | 22  | 37319436  | 37319436  | C         | T       | CSF2RB          | intronic                    | c.200+27        | e2+27             | tier3 | 29488              | 3041                 | 3023             | 14               | 0.005      | 25804               | 1542                  | 1248              | 290               | 0.189       | NA              | NA                | NA            | NA            | NA      | 130760          | 569               | 569           | 0             | 0.000   | NA               | NA                 | NA             | NA             | NA       |    |
| 147457 | 22  | 37892522  | 37892522  | C         | T       | CARD10          | missense                    | c.1993          | p.E665K           | tier1 | 7072               | 1147                 | 1135             | 10               | 0.009      | 12107               | 1715                  | 1279              | 433               | 0.253       | NA              | NA                | NA            | NA            | NA      | 18615           | 146               | 146           | 0             | 0.000   | NA               | NA                 | NA             | NA             | NA       |    |
| 147457 | 22  | 38062929  | 38062929  | G         | A       | PDXP            | 3_prime_untranslated_region | c.*1051         | NULL              | tier2 | 32675              | 3739                 | 3698             | 34               | 0.009      | 27225               | 1997                  | 1519              | 474               | 0.238       | NA              | NA                | NA            | NA            | NA      | 275521          | 1042              | 1040          | 0             | 0.000   | NA               | NA                 | NA             | NA             | NA       |    |
| 147457 | X   | 2406917   | 2406917   | C         | T       | ZBED1           | missense                    | c.1844          | p.R615H           | tier1 | 43312              | 6503                 | 6426             | 69               | 0.011      | 44160               | 4762                  | 3374              | 1379              | 0.290       | NA              | NA                | NA            | NA            | NA      | 120964          | 708               | 707           | 0             | 0.000   | NA               | NA                 | NA             | NA             | NA       |    |
| 147457 | X   | 20070889  | 20070889  | C         | T       | MAP7D2          | intronic                    | c.595+107       | e5+107            | tier3 | 53914              | 6343                 | 6289             | 47               | 0.007      | 45177               | 3601                  | 2758              | 838               | 0.233       | NA              | NA                | NA            | NA            | NA      | 188162          | 742               | 730           | 9             | 0.012   | NA               | NA                 | NA             | NA             | NA       |    |
| 147457 | X   | 29973688  | 29973688  | G         | A       | ILIRAPL1        | silent                      | c.1842          | p.T614            | tier1 | 45477              | 5734                 | 5671             | 58               | 0.010      | 49124               | 4546                  | 3206              | 1318              | 0.291       | NA              | NA                | NA            | NA            | NA      | 120988          | 512               | 498           | 12            | 0.024   | NA               | NA                 | NA             | NA             | NA       |    |
| 147457 | X   | 29974566  | 29974566  | G         | A       | ILIRAPL1        | 3_prime_untranslated_region | c.*629          | NULL              | tier3 | 11625              | 1711                 | 1697             | 12               | 0.007      | 15316               | 2088                  | 1494              | 586               | 0.282       | NA              | NA                | NA            | NA            | NA      | 34432           | 365               | 363           | 1             | 0.000   | NA               | NA                 | NA             | NA             | NA       |    |
| 147457 | X   | 41530801  | 41530801  | C         | T       | CASK            | intronic                    | c.430-18        | e6-18             | tier4 | 6687               | 1019                 | 1003             | 16               | 0.016      | 9343                | 1184                  | 822               | 360               | 0.305       | NA              | NA                | NA            | NA            | NA      | 21317           | 139               | 139           | 0             | 0.000   | NA               | NA                 | NA             | NA             | NA       |    |
| 147457 | X   | 49032048  | 49032048  | G         | A       | PRICKLE3        | nonsense                    | c.1822          | p.R608*           | tier1 | 30094              | 3327                 | 3286             | 39               | 0.012      | 24630               | 1705                  | 1302              | 401               | 0.235       | NA              | NA                | NA            | NA            | NA      | 144633          | 581               | 570           | 6             | 0.010   | NA               | NA                 | NA             | NA             | NA       |    |
| 147457 | X   | 69595890  | 69595890  | C         | T       | KIF4A           | intronic                    | c.1924-60       | e17-60            | tier3 | 20196              | 2557                 | 2542             | 13               | 0.005      | 16532               | 1619                  | 1383              | 234               | 0.145       | NA              | NA                | NA            | NA            | NA      | 94147           | 348               | 345           | 3             | 0.000   | NA               | NA                 | NA             | NA             | NA       |    |
| 147457 | X   | 70836264  | 70836264  | C         | T       | CXCR3           | missense                    | c.1199          | p.R400Q           | tier1 | 41171              | 5462                 | 5428             | 31               | 0.006      | 42969               | 4051                  | 2958              | 1079              | 0.267       | NA              | NA                | NA            | NA            | NA      | 78679           | 373               | 351           | 22            | 0.059   | NA               | NA                 | NA             | NA             | NA       |    |
| 147457 | X   | 71427464  | 71427464  | C         | A       | ERCC6L          | missense                    | c.1153          | p.V385L           | tier1 | 12556              | 1953                 | 1940             | 13               | 0.007      | 15638               | 2553                  | 1965              | 584               | 0.229       | NA              | NA                | NA            | NA            | NA      | 52191           | 273               | 270           | 3             | 0.011   | NA               | NA                 | NA             | NA             | NA       |    |
| 147457 | X   | 79281277  | 79281277  | G         | A       | TBX22           | splice_site                 | c.633+1         | e4+1              | tier1 | 29891              | 3894                 | 3872             | 21               | 0.005      | 48498               | 4549                  | 3408              | 1128              | 0.249       | NA              | NA                | NA            | NA            | NA      | 203552          | 841               | 841           | 0             | 0.000   | NA               | NA                 | NA             | NA             | NA       |    |
| 147457 | X   | 84525966  | 84525966  | C         | T       | ZNF711          | missense                    | c.1442          | p.P481L           | tier1 | 52528              | 6434                 | 6365             | 62               | 0.010      | 60448               | 5486                  | 4068              | 1386              | 0.254       | NA              | NA                | NA            | NA            | NA      | 210960          | 859               | 842           | 17            | 0.020   | NA               | NA                 | NA             | NA             | NA       |    |
| 147457 | X   | 103316458 | 103316458 | C         | T       | H2BFW2          | 5_prime_flanking_region     | c.-48226        | NULL              | tier3 | 61088              | 7275                 | 7196             | 68               | 0.009      | 52134               | 3525                  | 3233              | 1101              | 0.254       | NA              | NA                | NA            | NA            | NA      | 375428          | 1507              | 1481          | 18            | 0.012   | NA               | NA                 | NA             | NA             | NA       |    |
| 147457 | X   | 105144665 | 105144665 | C         | T       | NRK             | missense                    | c.766           | p.P256S           | tier1 | 7692               | 1223                 | 1215             | 6                | 0.005      | 16562               | 2319                  | 1838              | 466               | 0.202       | NA              | NA                | NA            | NA            | NA      | 27407           | 128               | 128           | 0             | 0.000   | NA               | NA                 | NA             | NA             | NA       |    |
| 147457 | X   | 120181966 | 120181966 | G         | A       | GLUD2           | missense                    | c.428           | p.R143H           | tier1 | 19731              | 3613                 | 3563             | 42               | 0.012      | 29697               | 3525                  | 2480              | 1024              | 0.292       | NA              | NA                | NA            | NA            | NA      | 42373           | 740               | 738           | 0             | 0.000   | NA               | NA                 | NA             | NA             | NA       |    |
| 147457 | X   | 123215311 | 123215311 | C         | T       | STAG2           | nonsense                    | c.2857          | p.R953*           | tier1 | 38027              | 4879                 | 4852             | 21               | 0.004      | 33850               | 3454                  | 2661              | 781               | 0.227       | NA              | NA                | NA            | NA            | NA      | 171103          | 691               | 687           | 3             | 0.004   | NA               | NA                 | NA             | NA             | NA       |    |
| 147457 | X   | 128929233 | 128929233 | G         | A       | ENSG00000240143 | intronic                    | c.NULL          | NULL              | tier3 | 20269              | 3119                 | 3079             | 37               | 0.012      | 26671               | 3093                  | 2179              | 902               | 0.293       | NA              | NA                | NA            | NA            | NA      | 87583           | 382               | 378           | 4             | 0.010   | NA               | NA                 | NA             | NA             | NA       |    |
| 147457 | X   | 129190113 | 129190113 | C         | T       | BCORL1          | 3_prime_untranslated_region | c.*2            | NULL              | tier3 | 40006              | 4594                 | 4545             | 37               | 0.008      | 31277               | 2243                  | 1814              | 421               | 0.188       | NA              | NA                | NA            | NA            | NA      | 132083          | 501               | 499           | 0             | 0.000   | NA               | NA                 | NA             | NA             | NA       |    |
| 147457 | X   | 129318354 | 129318354 | C         | T       | RAB33A          | silent                      | c.354           | p.D118            | tier1 | 33357              | 4217                 | 4176             | 40               | 0.009      | 47449               | 3781                  | 2746              | 1021              | 0.271       | NA              | NA                | NA            | NA            | NA      | 55018           | 250               | 250           | 0             | 0.000   | NA               | NA                 | NA             | NA             | NA       |    |
| 147457 | X   | 129658059 | 129658059 | G         | A       | ENSG00000229702 | 5_prime_untranslated_region | c.-129658059    | NULL              | tier2 | 8763               | 1510                 | 1498             | 7                | 0.005      | 13164               | 1850                  | 1397              | 445               | 0.242       | NA              | NA                | NA            | NA            | NA      | 35695           | 149               | 147           | 2             | 0.000   | NA               | NA                 | NA             | NA             | NA       |    |
| 147457 | X   | 138678815 | 138678815 | G         | A       | MCF2            | nonsense                    | c.2605          | p.R869*           | tier1 | 8524               | 1103                 | 1091             | 11               | 0.010      | 13628               | 1460                  | 1022              | 455               | 0.312       | NA              | NA                | NA            | NA            | NA      | 21660           | 117               | 117           | 0             | 0.000   | NA               | NA                 | NA             | NA             | NA       |    |
| 147457 | X   | 153660704 | 153660704 | C         | T       | ATPGAP1         | silent                      | c.456           | p.L152            | tier1 | 38293              | 4612                 | 4576             | 35               | 0.008      | 33550               | 2766                  | 2138              | 625               | 0.226       | NA              | NA                | NA            | NA            | NA      | 146124          | 512               | 509           | 2             | 0.000   | NA               | NA                 | NA             | NA             | NA       |    |
| 147457 | X   | 153696165 | 153696165 | G         | A       | PLXNA3          | missense                    | c.3641          | p.R1214Q          | tier1 | 67610              | 7812                 | 7711             | 89               | 0.011      | 72459               | 5126                  | 3485              | 1625              | 0.318       | NA              | NA                | NA            | NA            | NA      | 268586          | 1007              | 976           | 15            | 0.015   | NA               | NA                 | NA             | NA             | NA       |    |
| 169510 | 1   | 115258745 | 115258745 | C         | G       | NRAS            | missense                    | c.37            | p.G13R            | tier1 | 22977              | 2771                 | 2677             | 86               | 0.031      | 18987               | 2368                  | 1379              | 967               | 0.412       | 4019            | 24                | 24            | 0             | 0.000   | 15410           | 508               | 507           | 1             | 0.000   | NA               | NA                 | NA             | NA             | NA       |    |
| 169510 | 2   | 39053173  | 39053173  | C         | T       | DHX57           | missense                    | c.2830          | p.G944R           | tier1 | 8622               | 1010                 | 939              | 68               | 0.068      | 7536                | 923                   | 502               | 414               | 0.452       | 1116            | 7                 | 3             | 4             | NA      | 7696            | 322               | 322           | 0             | 0.000   | NA               | NA                 | NA             | NA             | NA       |    |
| 169510 | 2   | 73316541  | 73316541  | G         | A       | RAB11FIP5       | rna                         | NULL            | NULL              | tier1 | 21839              | 2804                 | 2637             | 155              | 0.056      | 14239               | 1684                  | 888               | 775               | 0.466       | 1793            | 12                | 8             | 4             | 0.333   | 13260           | 417               | 417           | 0             | 0.000   | NA               | NA                 | NA             | NA             | NA       |    |
| 169510 | 3   | 184922434 | 184922434 | C         | G       | EHHADH          | missense                    | c.680           | p.C227S           | tier1 | 40109              | 5263                 | 5092             | 156              | 0.030      | 25056               | 3318                  | 2023              | 1238              | 0.380       | 13593           | 41                | 41            | 0             | 0.000   | 26178           | 718               | 717           | 1             | 0.000   | NA               | NA                 | NA             | NA             | NA       |    |
| 169510 | 4   | 96044976  | 96044976  | C         | G       | BMPRI1B         | missense                    | c.455           | p.P152R           | tier1 | 3573               | 342                  | 334              | 6                | 0.018      | 3154                | 340                   | 232               | 104               | 0.310       | 1108            | 0                 | 0             | 0             | 0       | NA              | 5083              | 298           | 298           | 0       | 0.000            | NA                 | NA             | NA             | NA       | NA |
| 169510 | 5   | 141236840 | 141236840 | C         | T       | PCDH1           | missense                    | c.3296          | p.G1099E          | tier1 | 20878              | 2560                 | 2394             | 153              | 0.060      | 22627               | 2768                  | 1582              | 1152              | 0.421       | 7304            | 32                | 31            | 1             | 0.000   | 15208           | 502               | 502           | 0             | 0.000   | NA               | NA                 | NA             | NA             | NA       |    |
| 169    |     |           |           |           |         |                 |                             |                 |                   |       |                    |                      |                  |                  |            |                     |                       |                   |                   |             |                 |                   |               |               |         |                 |                   |               |               |         |                  |                    |                |                |          |    |

| UPN    | Chr | Start     | Stop      | Reference | Variant | Gene Symbol | Mutation Type               | Coding Position | Amino Acid Change | Tier  | Normal Total Count | Normal Unique Count* | Normal Ref Count | Normal Var Count | Normal VAF | Initial Total Count | Initial Unique Count* | Initial Ref Count | Initial Var Count | Initial VAF | Pre Total Count | Pre Unique Count* | Pre Ref Count | Pre Var Count | Pre VAF | D30 Total Count | D30 Unique Count* | D30 Ref Count | D30 Var Count | D30 VAF | D100 Total Count | D100 Unique Count* | D100 Ref Count | D100 Var Count | D100 VAF |
|--------|-----|-----------|-----------|-----------|---------|-------------|-----------------------------|-----------------|-------------------|-------|--------------------|----------------------|------------------|------------------|------------|---------------------|-----------------------|-------------------|-------------------|-------------|-----------------|-------------------|---------------|---------------|---------|-----------------|-------------------|---------------|---------------|---------|------------------|--------------------|----------------|----------------|----------|
| 185295 | 12  | 65272304  | 65272304  | C         | T       | TBC1D30     | 3_prime_untranslated_region | c.*2736         | NULL              | tier3 | 30023              | 4019                 | 4010             | 4                | 0.001      | 99196               | 12907                 | 9722              | 3053              | 0.239       | 37985           | 2579              | 1622          | 951           | 0.370   | 80434           | 10102             | 10088         | 4             | 0.000   | 71793            | 6371               | 6363           | 4              | 0.000    |
| 185295 | 12  | 124427322 | 124427322 | A         | C       | CCDC92      | nonsense                    | c.192           | p.Y64*            | tier1 | 8592               | 1257                 | 1245             | 11               | 0.009      | 25738               | 3997                  | 2472              | 1482              | 0.375       | 4710            | 568               | 317           | 251           | 0.442   | 7199            | 1065              | 1065          | 0             | 0.000   | 12984            | 1924               | 1922           | 0              | 0.000    |
| 185295 | 13  | 48547335  | 48547335  | G         | A       | SUCLA2      | intronc                     | c.663+64        | e5+64             | tier3 | 1632               | 210                  | 210              | 0                | 0.000      | 3506                | 497                   | 366               | 127               | 0.258       | 2675            | 283               | 166           | 117           | 0.413   | 3706            | 530               | 529           | 1             | 0.000   | 2230             | 0                  | 0              | 0              | NA       |
| 185295 | 13  | 52684711  | 52684711  | G         | T       | NEK5        | silent                      | c.315           | p.I105            | tier1 | 1982               | 320                  | 318              | 2                | 0.006      | 19764               | 2677                  | 1922              | 745               | 0.279       | 6913            | 564               | 327           | 235           | 0.418   | 18570           | 2471              | 2466          | 4             | 0.000   | 13850            | 1560               | 1560           | 0              | 0.000    |
| 185295 | 14  | 96552991  | 96552991  | C         | T       | C14orf132   | rna                         | NULL            | NULL              | tier1 | 10922              | 1708                 | 1703             | 3                | 0.002      | 37248               | 5111                  | 3487              | 1592              | 0.313       | 7280            | 638               | 335           | 302           | 0.474   | 15816           | 2168              | 2165          | 2             | 0.000   | 17449            | 2002               | 1997           | 1              | 0.000    |
| 185295 | 15  | 85343270  | 85343270  | C         | G       | ZNF592      | intronc                     | c.3273+62       | e7+62             | tier3 | 11581              | 1946                 | 1935             | 6                | 0.003      | 52415               | 8134                  | 5754              | 2324              | 0.288       | 18696           | 1449              | 947           | 498           | 0.345   | 32984           | 4648              | 4644          | 2             | 0.000   | 39476            | 4479               | 4474           | 4              | 0.000    |
| 185295 | 17  | 10545798  | 10545798  | C         | T       | MYH3        | silent                      | c.1824          | p.G608            | tier1 | 24528              | 3432                 | 3417             | 2                | 0.001      | 67363               | 9567                  | 7743              | 1748              | 0.184       | 13879           | 1099              | 836           | 260           | 0.237   | 45257           | 5804              | 5793          | 2             | 0.000   | 46955            | 4732               | 4720           | 3              | 0.000    |
| 185295 | 17  | 43008929  | 43008929  | C         | T       | KIF18B      | intronc                     | c.1553+41       | e10+41            | tier3 | 34219              | 4512                 | 4494             | 10               | 0.002      | 110631              | 14002                 | 9579              | 4259              | 0.308       | 25946           | 1668              | 996           | 669           | 0.402   | 67163           | 8199              | 8194          | 1             | 0.000   | 79687            | 6980               | 6972           | 2              | 0.000    |
| 185295 | 21  | 44524456  | 44524456  | G         | A       | U2AF1       | missense                    | c.101           | p.S34F            | tier1 | 7843               | 1166                 | 1157             | 8                | 0.007      | 15332               | 2695                  | 1999              | 687               | 0.256       | 7658            | 909               | 734           | 172           | 0.190   | 13525           | 1904              | 1903          | 0             | 0.000   | 14386            | 2266               | 2263           | 0              | 0.000    |
| 185295 | 21  | 47847509  | 47847509  | C         | T       | PCNT        | intronc                     | c.7321-27       | e34-27            | tier3 | 27599              | 3605                 | 3580             | 25               | 0.007      | 79444               | 10216                 | 6138              | 3984              | 0.394       | 29939           | 1712              | 1051          | 656           | 0.384   | 47606           | 5922              | 5915          | 6             | 0.000   | 64194            | 5201               | 5195           | 4              | 0.000    |
| 185295 | 22  | 39887386  | 39887386  | G         | A       | MGAT3       | 3_prime_untranslated_region | c.*2432         | NULL              | tier3 | 4360               | 592                  | 592              | 0                | 0.000      | 22192               | 2926                  | 2019              | 891               | 0.306       | 7993            | 574               | 311           | 262           | 0.457   | 11291           | 1466              | 1464          | 0             | 0.000   | 11878            | 1150               | 1148           | 0              | 0.000    |
| 185295 | X   | 39921391  | 39921391  | C         | T       | BCOR        | splice_site                 | c.4428+1        | e9+1              | tier1 | 8025               | 986                  | 984              | 1                | 0.001      | 21687               | 2820                  | 1323              | 1482              | 0.158       | 5162            | 371               | 64            | 306           | 0.827   | 35766           | 4512              | 4505          | 2             | 0.000   | 19031            | 1882               | 1881           | 1              | 0.000    |
| 187374 | 1   | 44467034  | 44467034  | C         | G       | SLC6A9      | intronc                     | c.1419+28       | e9+28             | tier3 | 18382              | 2475                 | 2458             | 15               | 0.006      | 12992               | 1796                  | 1550              | 241               | 0.125       | NA              | NA                | NA            | NA            | NA      | 31219           | 4582              | 4570          | 11            | 0.002   | 19177            | 2711               | 2662           | 48             | 0.018    |
| 187374 | 1   | 47512254  | 47512254  | G         | A       | CYP4X1      | missense                    | c.1189          | p.G397R           | tier1 | 23710              | 2775                 | 2766             | 9                | 0.003      | 29898               | 3978                  | 2796              | 1157              | 0.293       | NA              | NA                | NA            | NA            | NA      | 56781           | 7735              | 7681          | 48            | 0.006   | 33334            | 4529               | 4318           | 197            | 0.044    |
| 187374 | 1   | 176564033 | 176564033 | C         | T       | PAPPA2      | silent                      | c.1293          | p.T431            | tier1 | 10718              | 1674                 | 1666             | 8                | 0.005      | 14829               | 2077                  | 1311              | 734               | 0.355       | NA              | NA                | NA            | NA            | NA      | 26831           | 3972              | 3936          | 31            | 0.008   | 17316            | 2573               | 2388           | 181            | 0.070    |
| 187374 | 1   | 179526224 | 179526224 | G         | A       | NPHS2       | silent                      | c.676           | p.L226            | tier1 | 35689              | 4191                 | 4166             | 22               | 0.005      | 33298               | 4346                  | 3044              | 1267              | 0.294       | NA              | NA                | NA            | NA            | NA      | 80138           | 10706             | 10634         | 66            | 0.006   | 42424            | 5718               | 5487           | 226            | 0.040    |
| 187374 | 2   | 25463295  | 25463295  | T         | A       | DNMT3A      | missense                    | c.2198          | p.E733V           | tier1 | 3678               | 430                  | 429              | 1                | 0.002      | 6584                | 873                   | 565               | 303               | 0.349       | NA              | NA                | NA            | NA            | NA      | 12858           | 2072              | 2053          | 15            | 0.007   | 8016             | 1237               | 1142           | 91             | 0.074    |
| 187374 | 2   | 37458814  | 37458814  | C         | A       | CEBPZ       | 5_prime_untranslated_region | c.-104          | NULL              | tier2 | 19902              | 2151                 | 2134             | 14               | 0.007      | 19554               | 2449                  | 1636              | 805               | 0.330       | NA              | NA                | NA            | NA            | NA      | 36543           | 4866              | 4828          | 38            | 0.008   | 20569            | 2735               | 2574           | 150            | 0.055    |
| 187374 | 2   | 42280542  | 42280542  | G         | A       | PKDCC       | 3_prime_untranslated_region | c.*42280542     | NULL              | tier3 | 13283              | 2086                 | 2076             | 8                | 0.004      | 13586               | 2073                  | 1352              | 706               | 0.343       | NA              | NA                | NA            | NA            | NA      | 26366           | 4754              | 4713          | 36            | 0.008   | 17954            | 3152               | 2969           | 178            | 0.057    |
| 187374 | 2   | 196673523 | 196673523 | C         | A       | DNAH7       | missense                    | c.9966          | p.W3322C          | tier1 | 18655              | 2110                 | 2094             | 9                | 0.004      | 19135               | 2563                  | 1980              | 570               | 0.224       | NA              | NA                | NA            | NA            | NA      | 43137           | 6001              | 5962          | 29            | 0.005   | 24544            | 3162               | 3057           | 97             | 0.031    |
| 187374 | 2   | 207570559 | 207570559 | G         | A       | DYTN        | missense                    | c.335           | p.A112V           | tier1 | 2160               | 370                  | 367              | 2                | 0.005      | 1755                | 327                   | 206               | 121               | 0.370       | NA              | NA                | NA            | NA            | NA      | 4203            | 944               | 935           | 8             | 0.008   | 1952             | 421                | 397            | 24             | 0.057    |
| 187374 | 3   | 133667500 | 133667500 | C         | T       | SLCO2A1     | missense                    | c.985           | p.V329I           | tier1 | 33511              | 3691                 | 3666             | 19               | 0.005      | 28340               | 3526                  | 2315              | 1167              | 0.335       | NA              | NA                | NA            | NA            | NA      | 57124           | 7710              | 7637          | 62            | 0.008   | 35246            | 4692               | 4467           | 216            | 0.046    |
| 187374 | 6   | 49676860  | 49676860  | A         | G       | CRISP2      | missense                    | c.50            | p.L175            | tier1 | 12559              | 1320                 | 1316             | 4                | 0.003      | 13955               | 1701                  | 1102              | 579               | 0.344       | NA              | NA                | NA            | NA            | NA      | 26392           | 3746              | 3702          | 40            | 0.011   | 15048            | 2009               | 1882           | 120            | 0.060    |
| 187374 | 7   | 139083345 | 139083345 | A         | T       | LUC7L2      | nonsense                    | c.355           | p.R119*           | tier1 | 8170               | 870                  | 868              | 1                | 0.001      | 6425                | 801                   | 482               | 317               | 0.397       | NA              | NA                | NA            | NA            | NA      | 19092           | 2513              | 2489          | 20            | 0.008   | 8096             | 1026               | 954            | 72             | 0.070    |
| 187374 | 9   | 101751401 | 101751401 | C         | T       | COL15A1     | intronc                     | c.724-59        | e5-59             | tier3 | 23453              | 3030                 | 3001             | 23               | 0.008      | 20110               | 2820                  | 1909              | 889               | 0.318       | NA              | NA                | NA            | NA            | NA      | 36101           | 5615              | 5567          | 44            | 0.008   | 25441            | 3820               | 3645           | 169            | 0.044    |
| 187374 | 9   | 131708388 | 131708388 | G         | A       | DOLK        | nonsense                    | c.1195          | p.R399*           | tier1 | 4590               | 743                  | 737              | 6                | 0.008      | 4222                | 670                   | 456               | 212               | 0.317       | NA              | NA                | NA            | NA            | NA      | 8862            | 1935              | 1918          | 16            | 0.008   | 4382             | 960                | 902            | 56             | 0.058    |
| 187374 | 9   | 132980111 | 132980111 | G         | T       | NCS1        | missense                    | c.90            | p.W30C            | tier1 | 11268              | 1362                 | 1357             | 2                | 0.001      | 9849                | 1446                  | 934               | 499               | 0.348       | NA              | NA                | NA            | NA            | NA      | 18614           | 3366              | 3330          | 32            | 0.010   | 11011            | 1855               | 1740           | 112            | 0.060    |
| 187374 | 10  | 25465090  | 25465090  | C         | T       | GPR158      | silent                      | c.741           | p.G247            | tier1 | 5731               | 724                  | 718              | 5                | 0.007      | 4535                | 581                   | 410               | 167               | 0.289       | NA              | NA                | NA            | NA            | NA      | 10977           | 1648              | 1637          | 8             | 0.005   | 5191             | 767                | 726            | 34             | 0.045    |
| 187374 | 11  | 36601073  | 36601073  | T         | C       | RAG1        | 3_prime_untranslated_region | c.*3087         | NULL              | tier2 | 557                | 42                   | 42               | 0                | 0.000      | 834                 | 98                    | 64                | 34                | 0.347       | NA              | NA                | NA            | NA            | NA      | 1373            | 197               | 196           | 1             | 0.000   | 560              | 73                 | 69             | 4              | 0.055    |
| 187374 | 11  | 70779207  | 70779207  | C         | T       | SHANK2      | intronc                     | c.1072+71       | e14+71            | tier4 | 2108               | 378                  | 377              | 1                | 0.003      | 1520                | 247                   | 180               | 64                | 0.262       | NA              | NA                | NA            | NA            | NA      | 3063            | 703               | 696           | 7             | 0.010   | 1696             | 347                | 331            | 16             | 0.046    |
| 187374 | 11  | 93439939  | 93439939  | C         | A       | KIAA1731    | missense                    | c.5625          | p.D1875E          | tier1 | 7573               | 678                  | 671              | 3                | 0.004      | 8150                | 846                   | 542               | 300               | 0.356       | NA              | NA                | NA            | NA            | NA      | 15939           | 2029              | 2012          | 17            | 0.008   | 8653             | 1087               | 1004           | 79             | 0.073    |
| 187374 | 11  | 93826848  | 93826848  | T         | C       | HEPHL1      | intronc                     | c.2434+42       | e13+42            | tier2 | 22662              | 2638                 | 2623             | 12               | 0.005      | 22411               | 2829                  | 1821              | 989               | 0.352       | NA              | NA                | NA            | NA            | NA      | 39413           | 4962              | 4927          | 30            | 0.006   | 28176            | 3611               | 3387           | 218            | 0.060    |
| 187374 | 12  | 53699798  | 53699798  | T         | G       | C12orf10    | missense                    | c.107           | p.V36G            | tier1 | 18490              | 2188                 | 2182             | 4                | 0.002      | 28643               | 3793                  | 3053              | 706               | 0.188       | NA              | NA                | NA            | NA            | NA      | 48631           | 6846              | 6813          | 28            | 0.004   | 36841            | 5083               | 4947           | 127            | 0.025    |
| 187374 | 12  | 56811467  | 56811467  | G         | A       | TIMELESS    | 5_prime_untranslated_region | c.-56811467     | NULL              | tier3 | 10249              | 1138                 | 1128             | 9                | 0.008      | 12404               | 1528                  | 980               | 539               | 0.355       | NA              | NA                | NA            | NA            | NA      | 24965           | 3707              | 3664          | 32            | 0.009   | 17083            | 2466               | 2319           | 141            | 0.057    |
| 187374 | 13  | 73334857  | 73334857  | C         | T       | DIS3        | intronc                     |                 |                   |       |                    |                      |                  |                  |            |                     |                       |                   |                   |             |                 |                   |               |               |         |                 |                   |               |               |         |                  |                    |                |                |          |

| UPN    | Chr | Start     | Stop      | Reference | Variant | Gene Symbol     | Mutation Type               | Coding Position | Amino Acid Change | Tier  | Normal Total Count | Normal Unique Count* | Normal Ref Count | Normal Var Count | Normal VAF | Initial Total Count | Initial Unique Count* | Initial Ref Count | Initial Var Count | Initial VAF | Pre Total Count | Pre Unique Count* | Pre Ref Count | Pre Var Count | Pre VAF | D30 Total Count | D30 Unique Count* | D30 Ref Count | D30 Var Count | D30 VAF | D100 Total Count | D100 Unique Count* | D100 Ref Count | D100 Var Count | D100 VAF |       |
|--------|-----|-----------|-----------|-----------|---------|-----------------|-----------------------------|-----------------|-------------------|-------|--------------------|----------------------|------------------|------------------|------------|---------------------|-----------------------|-------------------|-------------------|-------------|-----------------|-------------------|---------------|---------------|---------|-----------------|-------------------|---------------|---------------|---------|------------------|--------------------|----------------|----------------|----------|-------|
| 199019 | 2   | 212288901 | 212288901 | C         | T       | ERBB4           | missense                    | c.2845          | p.V949I           | tier1 | 10803              | 1014                 | 1012             | 2                | 0.002      | 7060                | 740                   | 589               | 146               | 0.199       | NA              | NA                | NA            | NA            | NA      | 12503           | 1694              | 1692          | 1             | 0.000   | 14646            | 273                | 272            | 0              | 0.000    |       |
| 199019 | 2   | 219267899 | 219267899 | C         | T       | CTDSP1          | intronic                    | c.471+49        | e+49              | tier3 | 14694              | 1478                 | 1439             | 38               | 0.026      | 13162               | 1294                  | 887               | 397               | 0.309       | NA              | NA                | NA            | NA            | NA      | 39467           | 5308              | 5263          | 39            | 0.007   | 31541            | 500                | 500            | 0              | 0.000    |       |
| 199019 | 4   | 106156453 | 106156453 | G         | T       | TET2            | nonsense                    | c.1354          | p.E452*           | tier1 | 10834              | 996                  | 955              | 37               | 0.037      | 8474                | 834                   | 638               | 186               | 0.226       | NA              | NA                | NA            | NA            | NA      | 16977           | 2319              | 2300          | 15            | 0.006   | 17092            | 286                | 286            | 0              | 0.000    |       |
| 199019 | 5   | 7302322   | 7302322   | G         | A       | ENSG00000205976 | intronic                    | c.NULL          | NULL              | tier3 | 11932              | 1270                 | 1246             | 24               | 0.019      | 7810                | 833                   | 585               | 242               | 0.293       | NA              | NA                | NA            | NA            | NA      | 18945           | 2643              | 2629          | 8             | 0.003   | 18343            | 245                | 245            | 0              | 0.000    |       |
| 199019 | 7   | 57529430  | 57529430  | A         | C       | ZNF716          | silent                      | p.S421          | tier1             | 9585  | 1016               | 1007                 | 9                | 0.009            | 5410       | 548                 | 447                   | 101               | 0.184             | NA          | NA              | NA                | NA            | NA            | NA      | 5713            | 743               | 743           | 0             | 0.000   | 18964            | 228                | 228            | 0              | 0.000    |       |
| 199019 | 8   | 38835514  | 38835514  | C         | T       | HTRA4           | missense                    | c.814           | p.R272W           | tier1 | 4084               | 299                  | 285              | 14               | 0.047      | 4666                | 387                   | 261               | 123               | 0.320       | NA              | NA                | NA            | NA            | NA      | 4648            | 605               | 596           | 5             | 0.008   | 4974             | 69                 | 68             | 0              | 0.000    |       |
| 199019 | 11  | 46747390  | 46747390  | C         | T       | F2              | intronic                    | c.560-19        | e-19              | tier4 | 9824               | 959                  | 944              | 14               | 0.015      | 5954                | 609                   | 415               | 189               | 0.313       | NA              | NA                | NA            | NA            | NA      | 11707           | 1655              | 1647          | 3             | 0.002   | 13687            | 191                | 191            | 0              | 0.000    |       |
| 199019 | 11  | 65062076  | 65062076  | G         | A       | POLA2           | silent                      | p.L471          | tier1             | 16562 | 1974               | 1964                 | 9                | 0.005            | 9872       | 1140                | 924                   | 206               | 0.182             | NA          | NA              | NA                | NA            | NA            | NA      | 15439           | 2237              | 2226          | 9             | 0.000   | 17132            | 300                | 299            | 1              | 0.000    |       |
| 199019 | 11  | 71949104  | 71949104  | G         | A       | INPP1           | missense                    | c.3571          | p.G1191R          | tier1 | 15200              | 1686                 | 1686             | 0                | 0.000      | 9280                | 1082                  | 1033              | 47                | 0.044       | NA              | NA                | NA            | NA            | NA      | 12253           | 1852              | 1850          | 1             | 0.000   | 15189            | 0                  | 0              | 0              | NA       |       |
| 199019 | 11  | 89018012  | 89018012  | G         | T       | TYR             | missense                    | c.1256          | p.G419V           | tier1 | 8959               | 836                  | 831              | 3                | 0.004      | 5386                | 546                   | 423               | 122               | 0.224       | NA              | NA                | NA            | NA            | NA      | 11470           | 1595              | 1590          | 4             | 0.003   | 11318            | 215                | 215            | 0              | 0.000    |       |
| 199019 | 12  | 124241407 | 124241407 | G         | A       | ATP6V0A2        | missense                    | c.2339          | p.R780H           | tier1 | 20664              | 2603                 | 2550             | 48               | 0.018      | 14513               | 1805                  | 1201              | 589               | 0.329       | NA              | NA                | NA            | NA            | NA      | 24533           | 3871              | 3847          | 18            | 0.005   | 33089            | 498                | 498            | 0              | 0.000    |       |
| 199019 | 14  | 106357572 | 106357572 | A         | G       | IGHD6-19        | silent                      | c.6             | p.Y2              | tier1 | 12705              | 1521                 | 1508             | 12               | 0.008      | 7058                | 805                   | 592               | 207               | 0.259       | NA              | NA                | NA            | NA            | NA      | 8271            | 1276              | 1274          | 0             | 0.000   | 11138            | 240                | 240            | 0              | 0.000    |       |
| 199019 | 15  | 50897271  | 50897271  | C         | T       | TRPM7           | missense                    | c.2780          | p.S927N           | tier1 | 7473               | 768                  | 761              | 6                | 0.008      | 4586                | 531                   | 368               | 159               | 0.302       | NA              | NA                | NA            | NA            | NA      | 8393            | 1257              | 1252          | 2             | 0.000   | 10511            | 242                | 242            | 0              | 0.000    |       |
| 199019 | 16  | 4736332   | 4736332   | G         | A       | MGRN1           | 3_prime_untranslated_region | c.*32           | NULL              | tier2 | 8269               | 796                  | 776              | 19               | 0.024      | 4986                | 598                   | 418               | 175               | 0.295       | NA              | NA                | NA            | NA            | NA      | 7903            | 1257              | 1248          | 9             | 0.007   | 11765            | 242                | 242            | 0              | 0.000    |       |
| 199019 | 17  | 7578445   | 7578445   | A         | T       | TP53            | missense                    | c.485           | p.I162N           | tier1 | 20913              | 2310                 | 2229             | 78               | 0.034      | 11259               | 1203                  | 489               | 705               | 0.590       | NA              | NA                | NA            | NA            | NA      | NA              | 30370             | 3906          | 3879          | 25      | 0.006            | 36911              | 427            | 426            | 0        | 0.000 |
| 199019 | 17  | 61898424  | 61898424  | A         | G       | FTSJ3           | silent                      | c.1938          | p.D646            | tier1 | 32049              | 3302                 | 3159             | 125              | 0.038      | 21842               | 2214                  | 1447              | 734               | 0.337       | NA              | NA                | NA            | NA            | NA      | 41729           | 5776              | 5724          | 49            | 0.008   | 49762            | 746                | 746            | 0              | 0.000    |       |
| 199019 | 17  | 72589154  | 72589154  | T         | C       | C17orf77        | 3_prime_untranslated_region | c.*237          | NULL              | tier3 | 2098               | 168                  | 163              | 4                | 0.024      | 1336                | 130                   | 70                | 60                | 0.462       | NA              | NA                | NA            | NA            | NA      | 1207            | 181               | 178           | 3             | 0.017   | 4356             | 99                 | 99             | 0              | 0.000    |       |
| 199019 | 17  | 75209492  | 75209492  | G         | A       | SEC14L1         | missense                    | p.D654N         | tier1             | 22753 | 2266               | 2264                 | 1                | 0.000            | 14132      | 1349                | 1198                  | 138               | 0.103             | NA          | NA              | NA                | NA            | NA            | NA      | 24385           | 3201              | 3193          | 3             | 0.000   | 32465            | 489                | 488            | 0              | 0.000    |       |
| 199019 | X   | 46513121  | 46513121  | A         | T       | SLC9A7          | missense                    | c.1067          | p.F356Y           | tier1 | 5001               | 733                  | 726              | 7                | 0.010      | 3527                | 529                   | 379               | 147               | 0.279       | NA              | NA                | NA            | NA            | NA      | 2380            | 579               | 575           | 3             | 0.005   | 3081             | 129                | 129            | 0              | 0.000    |       |
| 199019 | X   | 132437274 | 132437274 | C         | T       | GPC4            | missense                    | c.1388          | p.R463H           | tier1 | 8105               | 808                  | 797              | 11               | 0.014      | 5560                | 537                   | 388               | 148               | 0.276       | NA              | NA                | NA            | NA            | NA      | NA              | 6138              | 825           | 814           | 10      | 0.012            | 5139               | 87             | 87             | 0        | 0.000 |
| 221833 | 1   | 3566445   | 3566445   | A         | C       | WRAP73          | intronic                    | c.69+50         | e1+50             | tier2 | 12673              | 1394                 | 1370             | 22               | 0.016      | 14612               | 1766                  | 1007              | 741               | 0.424       | 9654            | 742               | 714           | 28            | 0.038   | 24767           | 3365              | 3358          | 2             | 0.000   | 40647            | 5815               | 5810           | 1              | 0.000    |       |
| 221833 | 2   | 59482372  | 59482372  | G         | A       | LOC101927285    | rna                         | NULL            | NULL              | tier1 | 30083              | 3504                 | 3476             | 21               | 0.006      | 27872               | 3237                  | 2355              | 839               | 0.263       | 15680           | 1369              | 1337          | 29            | 0.021   | 37259           | 4749              | 4742          | 3             | 0.001   | 64870            | 8520               | 8504           | 1              | 0.000    |       |
| 221833 | 2   | 74742861  | 74742861  | C         | A       | TLX2            | missense                    | c.502           | p.Q168K           | tier1 | 140                | 0                    | 0                | 0                | 0.000      | 789                 | 66                    | 21                | 45                | 0.682       | 251             | 11                | 11            | 0             | 0.000   | 881             | 98                | 98            | 0             | 0.000   | 1602             | 193                | 192            | 0              | 0.000    |       |
| 221833 | 2   | 86923062  | 86923062  | T         | A       | CHMP3           | intronic                    | c.1-7614        | e1-7614           | tier4 | 20740              | 2330                 | 2253             | 74               | 0.032      | 26026               | 2919                  | 1097              | 1774              | 0.618       | 14545           | 1214              | 1107          | 98            | 0.081   | 30356           | 3916              | 3894          | 13            | 0.003   | 55953            | 7036               | 7020           | 0              | 0.000    |       |
| 221833 | 2   | 198638852 | 198638852 | G         | A       | ENSG00000222017 | 3_prime_untranslated_region | c.*71           | NULL              | tier3 | 8677               | 1095                 | 1084             | 8                | 0.007      | 9797                | 1314                  | 989               | 313               | 0.240       | 5521            | 577               | 566           | 10            | 0.017   | 12615           | 1904              | 1902          | 1             | 0.000   | 18821            | 3192               | 3190           | 0              | 0.000    |       |
| 221833 | 3   | 38766591  | 38766591  | C         | A       | SCN10A          | intronic                    | c.3228+74       | e17+74            | tier3 | 8106               | 1584                 | 1569             | 13               | 0.008      | 7231                | 1323                  | 757               | 554               | 0.423       | 6156            | 871               | 831           | 39            | 0.045   | 12094           | 2566              | 2561          | 4             | 0.002   | 22037            | 5407               | 5403           | 1              | 0.000    |       |
| 221833 | 3   | 57616622  | 57616622  | G         | A       | DENND6A         | intronic                    | c.1407+30       | e16+30            | tier3 | 989                | 138                  | 137              | 1                | 0.007      | 2530                | 330                   | 195               | 133               | 0.405       | 2802            | 242               | 231           | 11            | 0.045   | 4159            | 606               | 604           | 0             | 0.000   | 6817             | 1005               | 1005           | 0              | 0.000    |       |
| 221833 | 3   | 97806175  | 97806175  | C         | T       | OR54C           | silent                      | c.159           | p.N53             | tier1 | 36366              | 4540                 | 4475             | 61               | 0.013      | 42497               | 5143                  | 2863              | 2207              | 0.435       | 32028           | 3014              | 2868          | 134           | 0.045   | 70471           | 9583              | 9575          | 5             | 0.000   | 138668           | 17965              | 17934          | 3              | 0.000    |       |
| 221833 | 4   | 115898324 | 115898324 | A         | G       | NDST4           | intronic                    | c.1066+19       | e2+19             | tier3 | 9917               | 1076                 | 1070             | 6                | 0.006      | 11131               | 1177                  | 766               | 401               | 0.344       | 11510           | 905               | 841           | 62            | 0.069   | 21535           | 2633              | 2625          | 1             | 0.000   | 36675            | 4698               | 4688           | 0              | 0.000    |       |
| 221833 | 5   | 13901373  | 13901373  | C         | T       | DNAH5           | silent                      | c.2040          | p.A680            | tier1 | 25893              | 3110                 | 3059             | 51               | 0.016      | 23822               | 2809                  | 1645              | 1130              | 0.407       | 19890           | 1649              | 1563          | 71            | 0.043   | 38164           | 4915              | 4908          | 3             | 0.000   | 78953            | 10064              | 10050          | 4              | 0.000    |       |
| 221833 | 6   | 33381539  | 33381539  | G         | A       | PHF1            | missense                    | c.614           | p.R205Q           | tier1 | 15906              | 1875                 | 1769             | 102              | 0.055      | 23175               | 2738                  | 1414              | 1303              | 0.480       | 14525           | 1154              | 734           | 411           | 0.359   | 27727           | 3409              | 3401          | 7             | 0.002   | 55834            | 6834               | 6801           | 9              | 0.001    |       |
| 221833 | 7   | 36396735  | 36396735  | G         | A       | KIAA0895        | missense                    | c.643           | p.P215S           | tier1 | 1273               | 188                  | 184              | 3                | 0.016      | 1215                | 172                   | 124               | 48                | 0.279       | 877             | 82                | 79            | 3             | 0.037   | 3222            | 463               | 462           | 1             | 0.000   | 7875             | 1523               | 1522           | 0              | 0.000    |       |
| 221833 | 7   | 63032656  | 63032656  | G         | A       | TNRC18P2        | intronic                    | c.NULL          | NULL              | tier2 | 1219               | 221                  | 220              | 1                | 0.005      | 1165                | 236                   | 180               | 56                | 0.237       | 329             | 33                | 31            | 2             | 0.000   | 1729            | 325               | 324           | 0             | 0.000   | 3386             | 772                | 771            | 0              | 0.000    |       |
| 221833 | 7   | 74482588  | 74482588  | C         | T       | WBSCR16         | missense                    | c.472           | p.V158M           | tier1 | 14272              | 1754                 | 1704             | 48               | 0.027      | 14578               | 1890                  | 1105              | 765               | 0.409       | 11661           | 1069              | 945           | 122           | 0.114   | 23290           | 3271              | 3260          | 5             | 0.002   | 46754            | 6677               | 6671           | 3              | 0.000    |       |
| 221833 | 9   | 138642911 | 138642911 | G         | A       | KCN11           | intronic                    | c.434+24        | e4+24             | tier3 | 18945              | 2191                 | 2124             | 64               | 0.029      | 14896               | 1690                  | 905               | 770               | 0.460       | 11753           | 950               |               |               |         |                 |                   |               |               |         |                  |                    |                |                |          |       |



| UPN    | Chr | Start     | Stop      | Reference | Variant | Gene Symbol | Mutation Type               | Coding Position | Amino Acid Change | Tier  | Normal Total Count | Normal Unique Count* | Normal Ref Count | Normal Var Count | Normal VAF | Initial Total Count | Initial Unique Count* | Initial Ref Count | Initial Var Count | Initial VAF | Pre Total Count | Pre Unique Count* | Pre Ref Count | Pre Var Count | Pre VAF | D30 Total Count | D30 Unique Count* | D30 Ref Count | D30 Var Count | D30 VAF | D100 Total Count | D100 Unique Count* | D100 Ref Count | D100 Var Count | D100 VAF |
|--------|-----|-----------|-----------|-----------|---------|-------------|-----------------------------|-----------------|-------------------|-------|--------------------|----------------------|------------------|------------------|------------|---------------------|-----------------------|-------------------|-------------------|-------------|-----------------|-------------------|---------------|---------------|---------|-----------------|-------------------|---------------|---------------|---------|------------------|--------------------|----------------|----------------|----------|
| 243777 | 1   | 3428641   | 3428641   | T         | C       | MEGF6       | missense                    | c.905           | p.N302S           | tier1 | 47798              | 5255                 | 5247             | 6                | 0.001      | 34014               | 4096                  | 3761              | 316               | 0.078       | NA              | NA                | NA            | NA            | NA      | 66578           | 9124              | 9116          | 0             | 0.000   | 116508           | 16030              | 16007          | 0              | 0.000    |
| 243777 | 1   | 24383863  | 24383863  | C         | T       | MYOM3       | silent                      | c.4314          | p.K1438           | tier1 | 19547              | 2264                 | 2197             | 63               | 0.028      | 10682               | 1405                  | 1027              | 370               | 0.265       | NA              | NA                | NA            | NA            | NA      | 23625           | 3618              | 3615          | 1             | 0.000   | 50047            | 7861               | 7851           | 0              | 0.000    |
| 243777 | 1   | 230921753 | 230921753 | A         | G       | CAPN9       | missense                    | c.1508          | p.D503G           | tier1 | 22696              | 2680                 | 2678             | 0                | 0.000      | 16707               | 2266                  | 2171              | 87                | 0.039       | NA              | NA                | NA            | NA            | NA      | 32519           | 5023              | 5012          | 1             | 0.000   | 42813            | 7340               | 7335           | 0              | 0.000    |
| 243777 | 2   | 103124587 | 103124587 | C         | T       | SLC9A4      | silent                      | c.1248          | p.F416            | tier1 | 22627              | 2438                 | 2425             | 8                | 0.003      | 16664               | 1902                  | 1700              | 193               | 0.102       | NA              | NA                | NA            | NA            | NA      | 34960           | 4647              | 4642          | 1             | 0.000   | 53972            | 7229               | 7218           | 0              | 0.000    |
| 243777 | 2   | 152534686 | 152534686 | C         | G       | NEB         | missense                    | c.3271          | p.D1091H          | tier1 | 8375               | 762                  | 735              | 23               | 0.030      | 6759                | 698                   | 538               | 158               | 0.227       | NA              | NA                | NA            | NA            | NA      | 13477           | 1743              | 1741          | 1             | 0.000   | 22802            | 3175               | 3172           | 0              | 0.000    |
| 243777 | 3   | 58870344  | 58870344  | C         | T       | C3orf67     | silent                      | c.267           | p.Q89             | tier1 | 3330               | 452                  | 436              | 16               | 0.035      | 3569                | 601                   | 457               | 144               | 0.240       | NA              | NA                | NA            | NA            | NA      | 6408            | 1316              | 1315          | 0             | 0.000   | 8656             | 1950               | 1948           | 2              | 0.000    |
| 243777 | 4   | 2932778   | 2932778   | G         | A       | MFSD10      | missense                    | c.1262          | p.A421V           | tier1 | 7096               | 673                  | 669              | 2                | 0.003      | 11229               | 1548                  | 1227              | 312               | 0.203       | NA              | NA                | NA            | NA            | NA      | 22441           | 3640              | 3636          | 1             | 0.000   | 37714            | 6377               | 6374           | 2              | 0.000    |
| 243777 | 5   | 82833952  | 82833952  | C         | T       | VCAN        | silent                      | c.5130          | p.D1710           | tier1 | 2852               | 293                  | 291              | 1                | 0.003      | 4791                | 783                   | 766               | 14                | 0.018       | NA              | NA                | NA            | NA            | NA      | 7568            | 1416              | 1414          | 0             | 0.000   | 13561            | 2847               | 2842           | 1              | 0.000    |
| 243777 | 5   | 140201927 | 140201927 | C         | A       | PCDH5A      | missense                    | c.567           | p.N189K           | tier1 | 15891              | 1566                 | 1546             | 16               | 0.010      | 14937               | 1745                  | 1372              | 364               | 0.210       | NA              | NA                | NA            | NA            | NA      | 31992           | 4432              | 4426          | 5             | 0.000   | 52355            | 7894               | 7882           | 0              | 0.000    |
| 243777 | 6   | 7829666   | 7829666   | G         | A       | BMP6        | intronic                    | c.665-15707     | e2-15707          | tier4 | 4290               | 487                  | 477              | 9                | 0.019      | 4377                | 567                   | 403               | 162               | 0.287       | NA              | NA                | NA            | NA            | NA      | 8651            | 1296              | 1295          | 0             | 0.000   | 8860             | 1588               | 1587           | 0              | 0.000    |
| 243777 | 6   | 42985369  | 42985369  | C         | A       | KLHDC3      | silent                      | c.267           | p.V89             | tier1 | 9228               | 1036                 | 1030             | 2                | 0.002      | 16814               | 2347                  | 2065              | 267               | 0.114       | NA              | NA                | NA            | NA            | NA      | 29057           | 4779              | 4778          | 0             | 0.000   | 50504            | 8987               | 8981           | 0              | 0.000    |
| 243777 | 6   | 42985377  | 42985377  | G         | A       | KLHDC3      | nonsense                    | c.275           | p.W92*            | tier1 | 9020               | 1024                 | 1013             | 3                | 0.003      | 16185               | 2304                  | 2003              | 274               | 0.120       | NA              | NA                | NA            | NA            | NA      | 28330           | 4709              | 4699          | 0             | 0.000   | 49613            | 8924               | 8916           | 1              | 0.000    |
| 243777 | 6   | 64290808  | 64290808  | G         | A       | PTPA41      | 3_prime_untranslated_region | c.*729          | NULL              | tier3 | 4544               | 490                  | 485              | 4                | 0.008      | 3755                | 395                   | 334               | 61                | 0.154       | NA              | NA                | NA            | NA            | NA      | 6555            | 800               | 800           | 0             | 0.000   | 14693            | 1912               | 1908           | 0              | 0.000    |
| 243777 | 7   | 135263622 | 135263622 | C         | T       | NUP205      | missense                    | c.1001          | p.A334V           | tier1 | 11944              | 1309                 | 1276             | 29               | 0.022      | 15884               | 1819                  | 1347              | 461               | 0.255       | NA              | NA                | NA            | NA            | NA      | 27824           | 3567              | 3563          | 3             | 0.000   | 56597            | 7291               | 7263           | 2              | 0.000    |
| 243777 | 8   | 117859879 | 117859879 | G         | A       | RAD21       | nonsense                    | c.1756          | p.R586*           | tier1 | 7435               | 729                  | 724              | 2                | 0.003      | 9929                | 1059                  | 943               | 112               | 0.106       | NA              | NA                | NA            | NA            | NA      | 18835           | 2368              | 2364          | 2             | 0.000   | 31132            | 4057               | 4057           | 0              | 0.000    |
| 243777 | 9   | 108125237 | 108125237 | G         | A       | SLC44A1     | missense                    | c.1036          | p.V346I           | tier1 | 4098               | 611                  | 598              | 11               | 0.018      | 3651                | 620                   | 502               | 116               | 0.188       | NA              | NA                | NA            | NA            | NA      | 6819            | 1356              | 1354          | 0             | 0.000   | 11488            | 2588               | 2585           | 0              | 0.000    |
| 243777 | 10  | 54076396  | 54076396  | T         | C       | DKK1        | silent                      | c.630           | p.C210            | tier1 | 11704              | 1458                 | 1417             | 41               | 0.028      | 6320                | 772                   | 543               | 228               | 0.296       | NA              | NA                | NA            | NA            | NA      | 10253           | 1441              | 1433          | 4             | 0.003   | 26513            | 4029               | 4012           | 1              | 0.000    |
| 243777 | 10  | 135350563 | 135350563 | G         | T       | CYP2E1      | splice_region               | c.968-4         | e7-4              | tier3 | 15475              | 1702                 | 1677             | 22               | 0.013      | 11458               | 1294                  | 1022              | 268               | 0.208       | NA              | NA                | NA            | NA            | NA      | 21275           | 2954              | 2953          | 0             | 0.000   | 34953            | 5018               | 5016           | 1              | 0.000    |
| 243777 | 11  | 67552796  | 67552796  | G         | T       | ALG1L8P     | 3_prime_untranslated_region | c.*67552796     | NULL              | tier3 | 7882               | 748                  | 741              | 6                | 0.008      | 6391                | 684                   | 520               | 164               | 0.240       | NA              | NA                | NA            | NA            | NA      | 14249           | 1756              | 1756          | 0             | 0.000   | 24092            | 3075               | 3075           | 0              | 0.000    |
| 243777 | 11  | 71175151  | 71175151  | C         | A       | NADSYN1     | missense                    | c.370           | p.R124S           | tier1 | 20939              | 2924                 | 2886             | 28               | 0.010      | 34569               | 4519                  | 3606              | 873               | 0.195       | NA              | NA                | NA            | NA            | NA      | 62386           | 9159              | 9151          | 2             | 0.000   | 104320           | 14866              | 14851          | 4              | 0.000    |
| 243777 | 11  | 132081872 | 132081872 | T         | A       | NTM         | intronic                    | c.401-44        | e4-44             | tier3 | 12716              | 1184                 | 1158             | 25               | 0.021      | 10366               | 1094                  | 855               | 233               | 0.214       | NA              | NA                | NA            | NA            | NA      | 18915           | 2518              | 2515          | 2             | 0.000   | 35985            | 4874               | 4867           | 0              | 0.000    |
| 243777 | 12  | 11992117  | 11992117  | G         | A       | ETV6        | nonsense                    | c.207           | p.W69*            | tier1 | 33041              | 3548                 | 3526             | 13               | 0.004      | 25437               | 2831                  | 2496              | 318               | 0.113       | NA              | NA                | NA            | NA            | NA      | 48212           | 6185              | 6184          | 0             | 0.000   | 91635            | 11949              | 11938          | 0              | 0.000    |
| 243777 | 16  | 51175096  | 51175096  | G         | A       | SALL1       | missense                    | c.1532          | p.A346V           | tier1 | 15532              | 1553                 | 1509             | 42               | 0.027      | 16802               | 1918                  | 1412              | 492               | 0.258       | NA              | NA                | NA            | NA            | NA      | 29105           | 3770              | 3765          | 3             | 0.000   | 49464            | 6730               | 6722           | 3              | 0.000    |
| 243777 | 17  | 10451010  | 10451010  | G         | A       | MYH2        | intronic                    | c.204+24        | e1+24             | tier3 | 26858              | 2722                 | 2685             | 23               | 0.008      | 23033               | 2555                  | 2039              | 494               | 0.195       | NA              | NA                | NA            | NA            | NA      | 39719           | 5095              | 5089          | 2             | 0.000   | 72769            | 9624               | 9612           | 1              | 0.000    |
| 243777 | 17  | 78313118  | 78313118  | C         | G       | RNF213      | missense                    | c.4951          | p.L1651V          | tier1 | 12490              | 1398                 | 1365             | 28               | 0.020      | 25412               | 2949                  | 2179              | 743               | 0.254       | NA              | NA                | NA            | NA            | NA      | 34291           | 4477              | 4474          | 0             | 0.000   | 55311            | 7290               | 7285           | 0              | 0.000    |
| 243777 | 18  | 42531917  | 42531917  | T         | C       | SETBP1      | missense                    | c.2612          | p.I871T           | tier1 | 29045              | 3318                 | 3307             | 10               | 0.003      | 28940               | 3401                  | 3292              | 96                | 0.028       | NA              | NA                | NA            | NA            | NA      | 48772           | 6435              | 6431          | 0             | 0.000   | 78461            | 10289              | 10276          | 0              | 0.000    |
| 243777 | 18  | 77896475  | 77896475  | A         | T       | ADNP2       | missense                    | c.3179          | p.D1060V          | tier1 | 2959               | 248                  | 244              | 4                | 0.016      | 3053                | 287                   | 221               | 64                | 0.225       | NA              | NA                | NA            | NA            | NA      | 6457            | 762               | 761           | 0             | 0.000   | 4593             | 560                | 560            | 0              | 0.000    |
| 243777 | 19  | 1525633   | 1525633   | C         | T       | PLK5        | 5_prime_untranslated_region | c.-1363         | NULL              | tier2 | 38807              | 4443                 | 4372             | 59               | 0.013      | 31055               | 3789                  | 3055              | 701               | 0.187       | NA              | NA                | NA            | NA            | NA      | 64060           | 8600              | 8586          | 6             | 0.000   | 88350            | 12391              | 12363          | 0              | 0.000    |
| 243777 | 19  | 51358189  | 51358189  | T         | A       | KLK3        | 5_prime_untranslated_region | c.-23           | NULL              | tier3 | 6819               | 572                  | 555              | 15               | 0.026      | 5847                | 628                   | 449               | 176               | 0.282       | NA              | NA                | NA            | NA            | NA      | 11601           | 1447              | 1446          | 0             | 0.000   | 18744            | 2464               | 2460           | 2              | 0.000    |
| 243777 | 19  | 57722941  | 57722941  | A         | G       | ZNF264      | missense                    | c.476           | p.D159G           | tier1 | 2742               | 330                  | 330              | 0                | 0.000      | 3665                | 574                   | 513               | 60                | 0.105       | NA              | NA                | NA            | NA            | NA      | 7563            | 1361              | 1359          | 0             | 0.000   | 8522             | 1895               | 1894           | 0              | 0.000    |
| 243777 | 20  | 3214593   | 3214593   | C         | T       | SLC4A11     | silent                      | c.708           | p.R236            | tier1 | 29045              | 3167                 | 3081             | 78               | 0.025      | 30713               | 3700                  | 2683              | 983               | 0.268       | NA              | NA                | NA            | NA            | NA      | 62507           | 8355              | 8341          | 6             | 0.001   | 95373            | 12885              | 12860          | 2              | 0.000    |
| 243777 | 21  | 44514777  | 44514777  | T         | G       | U2AF1       | missense                    | c.470           | p.Q157P           | tier1 | 38655              | 4203                 | 4150             | 44               | 0.010      | 31107               | 3449                  | 2647              | 775               | 0.226       | NA              | NA                | NA            | NA            | NA      | 59638           | 7201              | 7198          | 1             | 0.000   | 120187           | 14390              | 14365          | 0              | 0.000    |
| 266995 | 1   | 24417462  | 24417462  | C         | A       | MYOM3       | missense                    | c.1260          | p.W420C           | tier1 | 43336              | 5494                 | 5485             | 4                | 0.001      | 33505               | 3643                  | 3483              | 155               | 0.043       | 20125           | 2128              | 2114          | 12            | 0.006   | 11871           | 1038              | 1036          | 0             | 0.000   | NA               | NA                 | NA             | NA             | NA       |
| 266995 | 1   | 181706618 | 181706618 | G         | A       | CACNA1E     | intronic                    | c.3423-43       | e23-43            | tier3 | 70463              | 9735                 | 9678             | 46               | 0.005      | 40500               | 4603                  | 4293              | 289               | 0.063       | 18267           | 2079              | 1097          | 970           | 0.469   | 17477           | 1623              | 1618          | 2             | 0.000   | NA               | NA                 | NA             | NA             | NA       |
| 266995 | 3   | 39230412  | 39230412  | C         | T       | XIRP1       | silent                      | c.525           | p.L175            | tier1 | 4494               | 539                  | 533              | 3                | 0.006      | 7456                | 722                   | 623               | 44                | 0.061       | 7423            | 798               | 460           | 334           | 0.421   | 2735            | 192               | 192           | 0             |         |                  |                    |                |                |          |

| UPN    | Chr | Start     | Stop      | Reference | Variant | Gene Symbol     | Mutation Type               | Coding Position | Amino Acid Change | Tier  | Normal Total Count | Normal Unique Count* | Normal Ref Count | Normal Var Count | Normal VAF | Initial Total Count | Initial Unique Count* | Initial Ref Count | Initial Var Count | Initial VAF | Pre Total Count | Pre Unique Count* | Pre Ref Count | Pre Var Count | Pre VAF | D30 Total Count | D30 Unique Count* | D30 Ref Count | D30 Var Count | D30 VAF | D100 Total Count | D100 Unique Count* | D100 Ref Count | D100 Var Count | D100 VAF |    |
|--------|-----|-----------|-----------|-----------|---------|-----------------|-----------------------------|-----------------|-------------------|-------|--------------------|----------------------|------------------|------------------|------------|---------------------|-----------------------|-------------------|-------------------|-------------|-----------------|-------------------|---------------|---------------|---------|-----------------|-------------------|---------------|---------------|---------|------------------|--------------------|----------------|----------------|----------|----|
| 280837 | 1   | 1669668   | 1669668   | G         | C       | SLC35E2         | intronic                    | c.586+92        | e3+92             | tier2 | 9681               | 1209                 | 1190             | 19               | 0.016      | 10714               | 998                   | 534               | 462               | 0.464       | 11692           | 1479              | 826           | 640           | 0.437   | 60277           | 2293              | 2262          | 31            | 0.014   | NA               | NA                 | NA             | NA             | NA       |    |
| 280837 | 1   | 28605680  | 28605680  | G         | A       | SES2N           | silent                      | c.1284          | p.V428            | tier1 | 13319              | 1360                 | 1352             | 7                | 0.005      | 14899               | 2048                  | 1169              | 873               | 0.428       | 19279           | 2400              | 1402          | 972           | 0.409   | 102550          | 7789              | 7714          | 67            | 0.009   | NA               | NA                 | NA             | NA             | NA       |    |
| 280837 | 2   | 25467497  | 25467497  | G         | A       | DNMT3A          | nonsense                    | c.1579          | p.Q527*           | tier1 | 70333              | 10023                | 9820             | 176              | 0.018      | 51291               | 6893                  | 3714              | 3137              | 0.458       | 64265           | 9581              | 5279          | 4051          | 0.434   | 278961          | 16532             | 16337         | 173           | 0.010   | NA               | NA                 | NA             | NA             | NA       |    |
| 280837 | 2   | 131453866 | 131453866 | T         | C       | ENSG00000240253 | intronic                    | c.NULL          | NULL              | tier3 | 6258               | 584                  | 582              | 2                | 0.003      | 5510                | 740                   | 410               | 330               | 0.446       | 6138            | 628               | 348           | 278           | 0.444   | 27099           | 2343              | 2320          | 22            | 0.009   | NA               | NA                 | NA             | NA             | NA       |    |
| 280837 | 2   | 234184342 | 234184342 | G         | A       | ATG16L1         | intronic                    | c.954+918       | e9+918            | tier4 | 31935              | 4714                 | 4707             | 7                | 0.001      | 24213               | 3828                  | 3112              | 707               | 0.185       | 31204           | 4812              | 4478          | 317           | 0.066   | 124297          | 8955              | 8938          | 11            | 0.001   | NA               | NA                 | NA             | NA             | NA       |    |
| 280837 | 3   | 118913221 | 118913221 | C         | T       | UPK1B           | silent                      | c.624           | p.G208            | tier1 | 39622              | 5047                 | 5017             | 29               | 0.006      | 20108               | 2658                  | 1488              | 1162              | 0.438       | 26153           | 3649              | 2269          | 1355          | 0.374   | 127966          | 7136              | 7057          | 75            | 0.011   | NA               | NA                 | NA             | NA             | NA       |    |
| 280837 | 4   | 1949812   | 1949812   | A         | C       | WHSC1           | 3_prime_untranslated_region | c.*5684         | NULL              | tier3 | 6331               | 1296                 | 1289             | 7                | 0.005      | 7076                | 1601                  | 902               | 696               | 0.436       | 7007            | 1524              | 850           | 665           | 0.439   | 37456           | 4426              | 4379          | 47            | 0.011   | NA               | NA                 | NA             | NA             | NA       |    |
| 280837 | 4   | 71888174  | 71888174  | G         | T       | DKC             | missense                    | c.298           | p.A100S           | tier1 | 5890               | 646                  | 642              | 4                | 0.006      | 6429                | 1102                  | 621               | 480               | 0.436       | 5748            | 744               | 477           | 262           | 0.355   | 29463           | 3599              | 3565          | 30            | 0.008   | NA               | NA                 | NA             | NA             | NA       |    |
| 280837 | 4   | 76817552  | 76817552  | G         | C       | PPEF2           | 5_prime_untranslated_region | c.-74           | NULL              | tier2 | 42602              | 5574                 | 5560             | 13               | 0.002      | 28801               | 4099                  | 2468              | 1613              | 0.395       | 30910           | 4269              | 2964          | 1262          | 0.299   | 199372          | 11731             | 11635         | 84            | 0.007   | NA               | NA                 | NA             | NA             | NA       |    |
| 280837 | 4   | 109769882 | 109769882 | C         | T       | COL25A1         | intronic                    | c.1434+33       | e26+33            | tier3 | 2621               | 967                  | 958              | 9                | 0.009      | 2906                | 724                   | 414               | 310               | 0.428       | 3662            | 1188              | 659           | 529           | 0.445   | 18032           | 2053              | 2039          | 14            | 0.007   | NA               | NA                 | NA             | NA             | NA       |    |
| 280837 | 5   | 74712651  | 74712651  | C         | A       | COL4A3BP        | intronic                    | c.1221+50       | e8+50             | tier3 | 8707               | 875                  | 872              | 2                | 0.002      | 6129                | 801                   | 466               | 334               | 0.418       | 8869            | 1013              | 696           | 311           | 0.309   | 76736           | 6352              | 6305          | 46            | 0.007   | NA               | NA                 | NA             | NA             | NA       |    |
| 280837 | 6   | 33136506  | 33136506  | C         | T       | COL11A2         | missense                    | c.3883          | p.E1295K          | tier1 | 57055              | 6946                 | 6901             | 42               | 0.006      | 25285               | 2410                  | 1348              | 1055              | 0.439       | 34912           | 4264              | 2439          | 1786          | 0.423   | 134392          | 5779              | 5727          | 52            | 0.009   | NA               | NA                 | NA             | NA             | NA       |    |
| 280837 | 7   | 150714308 | 150714308 | C         | T       | ATG9B           | 5_prime_untranslated_region | c.-150714308    | NULL              | tier2 | 40833              | 5544                 | 5536             | 4                | 0.001      | 15091               | 1946                  | 1318              | 613               | 0.317       | 19717           | 2684              | 2446          | 230           | 0.086   | 197641          | 12873             | 12844         | 17            | 0.001   | NA               | NA                 | NA             | NA             | NA       |    |
| 280837 | 8   | 131129068 | 131129068 | C         | T       | ASAP1           | intronic                    | c.2005+58       | e21+58            | tier3 | 3325               | 612                  | 605              | 6                | 0.010      | 4520                | 1144                  | 642               | 501               | 0.438       | 4563            | 974               | 561           | 411           | 0.423   | 21880           | 2898              | 2864          | 33            | 0.011   | NA               | NA                 | NA             | NA             | NA       |    |
| 280837 | 9   | 139903977 | 139903977 | G         | A       | ABCA2           | intronic                    | c.6824+16       | e44+16            | tier2 | 966                | 63                   | 62               | 1                | 0.016      | 6142                | 788                   | 92                | 696               | 0.883       | 4670            | 633               | 77            | 554           | 0.878   | 15744           | 2436              | 2339          | 96            | 0.039   | NA               | NA                 | NA             | NA             | NA       |    |
| 280837 | 10  | 38651191  | 38651191  | G         | A       | HSD17B7P2       | 3_prime_untranslated_region | c.*38651191     | NULL              | tier3 | 18221              | 2023                 | 2015             | 8                | 0.004      | 16976               | 2382                  | 1369              | 1010              | 0.425       | 19355           | 2319              | 1407          | 897           | 0.389   | 111636          | 8539              | 8418          | 109           | 0.013   | NA               | NA                 | NA             | NA             | NA       |    |
| 280837 | 10  | 68139043  | 68139043  | T         | C       | CTNNA3          | silent                      | c.1599          | p.L533            | tier1 | 44029              | 6712                 | 6687             | 23               | 0.003      | 26718               | 3792                  | 2344              | 1435              | 0.380       | 33542           | 5048              | 3133          | 1859          | 0.372   | 161892          | 9926              | 9843          | 77            | 0.008   | NA               | NA                 | NA             | NA             | NA       |    |
| 280837 | 10  | 119044294 | 119044294 | T         | C       | PDZD8           | silent                      | c.1950          | p.Q650            | tier1 | 56391              | 7083                 | 7072             | 10               | 0.001      | 27321               | 3874                  | 2478              | 1294              | 0.343       | 28831           | 3811              | 2909          | 870           | 0.230   | 248111          | 15317             | 15248         | 68            | 0.004   | NA               | NA                 | NA             | NA             | NA       |    |
| 280837 | 11  | 4107876   | 4107876   | G         | T       | STIM1           | intronic                    | c.1541+103      | e11+103           | tier3 | 10940              | 1341                 | 1332             | 9                | 0.007      | 5943                | 599                   | 495               | 100               | 0.168       | 7722            | 1005              | 881           | 117           | 0.117   | 5489            | 831               | 820           | 11            | 0.013   | NA               | NA                 | NA             | NA             | NA       |    |
| 280837 | 11  | 12225810  | 12225810  | G         | T       | MICAL2          | missense                    | c.278           | p.G93A            | tier1 | 59097              | 7374                 | 7316             | 55               | 0.007      | 25404               | 4645                  | 1379              | 1260              | 0.477       | 31790           | 4467              | 2317          | 2104          | 0.476   | 148293          | 4929              | 4866          | 63            | 0.013   | NA               | NA                 | NA             | NA             | NA       |    |
| 280837 | 12  | 14689595  | 14689595  | A         | G       | PLBD1           | missense                    | c.608           | p.L203S           | tier1 | 7917               | 901                  | 891              | 9                | 0.010      | 7044                | 832                   | 480               | 351               | 0.422       | 8647            | 1018              | 613           | 397           | 0.393   | 54095           | 2606              | 2576          | 29            | 0.011   | NA               | NA                 | NA             | NA             | NA       |    |
| 280837 | 17  | 1563288   | 1563288   | T         | A       | PRPF8           | missense                    | c.4793          | p.D1598V          | tier1 | 53750              | 6375                 | 6329             | 36               | 0.006      | 40103               | 5019                  | 2849              | 2148              | 0.430       | 52592           | 6484              | 3701          | 2660          | 0.418   | 273050          | 15221             | 15037         | 164           | 0.011   | NA               | NA                 | NA             | NA             | NA       |    |
| 280837 | 17  | 27210235  | 27210235  | C         | T       | FLOT2           | silent                      | c.402           | p.T134            | tier1 | 16063              | 2496                 | 2410             | 81               | 0.033      | 21267               | 3874                  | 2150              | 1711              | 0.443       | 26403           | 3875              | 2134          | 1690          | 0.442   | 139781          | 13386             | 13242         | 130           | 0.010   | NA               | NA                 | NA             | NA             | NA       |    |
| 280837 | 17  | 73910078  | 73910078  | C         | T       | FBF1            | silent                      | c.3003          | p.Q100I           | tier1 | 40681              | 4966                 | 4946             | 19               | 0.004      | 21923               | 2287                  | 1507              | 775               | 0.340       | 28674           | 3794              | 2479          | 1285          | 0.341   | 172441          | 7316              | 7263          | 51            | 0.007   | NA               | NA                 | NA             | NA             | NA       |    |
| 280837 | 18  | 5891961   | 5891961   | C         | G       | TMEM200C        | missense                    | c.102           | p.R34S            | tier1 | 72630              | 8874                 | 8814             | 54               | 0.006      | 45356               | 4284                  | 2653              | 2147              | 0.447       | 48621           | 5914              | 3328          | 2469          | 0.426   | 317261          | 13074             | 12898         | 169           | 0.013   | NA               | NA                 | NA             | NA             | NA       |    |
| 280837 | 19  | 9001863   | 9001863   | G         | A       | MUC16           | nonsense                    | c.904           | p.R302*           | tier1 | 16873              | 2093                 | 2081             | 12               | 0.006      | 8565                | 884                   | 521               | 361               | 0.409       | 12012           | 1511              | 890           | 613           | 0.408   | 59170           | 2293              | 2275          | 18            | 0.008   | NA               | NA                 | NA             | NA             | NA       |    |
| 280837 | 20  | 30409206  | 30409206  | C         | T       | MYLK2           | intronic                    | c.474-36        | e3-36             | tier3 | 24229              | 2778                 | 2770             | 8                | 0.003      | 35463               | 3643                  | 2316              | 1314              | 0.362       | 47807           | 5947              | 3804          | 2069          | 0.352   | 333071          | 13372             | 13277         | 80            | 0.006   | NA               | NA                 | NA             | NA             | NA       |    |
| 280837 | X   | 129147939 | 129147939 | G         | A       | BCORL1          | missense                    | c.1191          | p.M397I           | tier1 | 29995              | 4025                 | 3955             | 55               | 0.014      | 17931               | 1969                  | 234               | 1730              | 0.881       | 24280           | 3188              | 469           | 2707          | 0.852   | 99901           | 6449              | 6284          | 142           | 0.022   | NA               | NA                 | NA             | NA             | NA       |    |
| 283773 | 9   | 20923717  | 20923717  | G         | A       | FOCAD           | missense                    | c.2911          | p.V971I           | tier1 | 19746              | 2206                 | 2203             | 3                | 0.001      | 15008               | 1546                  | 1249              | 290               | 0.188       | 19650           | 2393              | 1998          | 381           | 0.160   | 11988           | 1046              | 1043          | 0             | 0.000   | 34366            | 4442               | 4433           | 1              | 0.000    |    |
| 283773 | 19  | 2121672   | 2121672   | C         | T       | AP3D1           | intronic                    | c.1101+61       | e12+61            | tier3 | 20522              | 2418                 | 2411             | 0                | 0.000      | 12541               | 1319                  | 1096              | 218               | 0.166       | 18871           | 2400              | 2149          | 242           | 0.101   | 11961           | 1035              | 1035          | 0             | 0.000   | 29951            | 3921               | 3913           | 0              | 0.000    |    |
| 283773 | 20  | 31023112  | 31023112  | T         | G       | ASXL1           | nonsense                    | c.2597          | p.L866*           | tier1 | 21481              | 2590                 | 2585             | 2                | 0.001      | 17274               | 1785                  | 1528              | 243               | 0.137       | 23913           | 2958              | 2620          | 335           | 0.113   | 17173           | 1473              | 1470          | 0             | 0.000   | 41409            | 5450               | 5440           | 0              | 0.000    |    |
| 283773 | X   | 70339865  | 70339865  | T         | A       | MED12           | missense                    | c.398           | p.V133D           | tier1 | 23909              | 2632                 | 2624             | 5                | 0.002      | 24201               | 2615                  | 2505              | 96                | 0.037       | 29792           | 3513              | 3462          | 49            | 0.014   | 9035            | 687               | 685           | 0             | 0.000   | 25021            | 0                  | 0              | 0              | 0        | NA |
| 283773 | X   | 106788960 | 106788960 | T         | C       | FRMPD3-AS1      | rna                         | NULL            | NULL              | tier1 | 24504              | 2819                 | 2789             | 24               | 0.009      | 18288               | 1879                  | 1688              | 180               | 0.096       | 19702           | 2363              | 2120          | 237           | 0.101   | 6765            | 531               | 530           | 0             | 0.000   | 16237            | 0                  | 0              | 0              | 0        | NA |
| 288033 | 2   | 33614218  | 33614218  | G         | T       | LTPB1           | intronic                    | c.4715-33       | e32-33            | tier3 | 21884              | 2522                 | 2455             | 66               | 0.026      | 21049               | 2058                  | 1174              | 851               | 0.420       | 44295           | 6019              | 5863          | 148           | 0.025   | 21500           | 2622              | 2614          | 6             | 0.002   | 69944            | 6949               | 6933           | 10             | 0.001    |    |
| 288033 | 3   | 126219009 | 12        |           |         |                 |                             |                 |                   |       |                    |                      |                  |                  |            |                     |                       |                   |                   |             |                 |                   |               |               |         |                 |                   |               |               |         |                  |                    |                |                |          |    |

| UPN    | Chr | Start     | Stop      | Reference | Variant | Gene Symbol     | Mutation Type               | Coding Position | Amino Acid Change | Tier  | Normal Total Count | Normal Unique Count* | Normal Ref Count | Normal Var Count | Normal VAF | Initial Total Count | Initial Unique Count* | Initial Ref Count | Initial Var Count | Initial VAF | Pre Total Count | Pre Unique Count* | Pre Ref Count | Pre Var Count | Pre VAF | D30 Total Count | D30 Unique Count* | D30 Ref Count | D30 Var Count | D30 VAF | D100 Total Count | D100 Unique Count* | D100 Ref Count | D100 Var Count | D100 VAF |
|--------|-----|-----------|-----------|-----------|---------|-----------------|-----------------------------|-----------------|-------------------|-------|--------------------|----------------------|------------------|------------------|------------|---------------------|-----------------------|-------------------|-------------------|-------------|-----------------|-------------------|---------------|---------------|---------|-----------------|-------------------|---------------|---------------|---------|------------------|--------------------|----------------|----------------|----------|
| 307995 | 2   | 61510631  | 61510631  | T         | C       | USP34           | intronic                    | c.4833-47       | e36-47            | tier3 | 3787               | 0                    | 0                | 0                | 0.000      | 1349                | 111                   | 94                | 17                | 0.153       | 2077            | 0                 | 0             | 0             | NA      | 4450            | 429               | 427           | 0             | 0.000   | 2281             | 0                  | 0              | 0              | NA       |
| 307995 | 2   | 138738953 | 138738953 | C         | T       | HNMT            | silent                      | c.358           | p.L120            | tier1 | 22240              | 2688                 | 2684             | 0                | 0.000      | 16074               | 1610                  | 1361              | 234               | 0.147       | 21010           | 2141              | 2133          | 0             | 0.000   | 35264           | 4055              | 4048          | 0             | 0.000   | 49152            | 6483               | 6477           | 0              | 0.000    |
| 307995 | 2   | 207310122 | 207310122 | T         | C       | ADAM23          | silent                      | c.306           | p.S102            | tier1 | 16606              | 2066                 | 2063             | 0                | 0.000      | 7808                | 803                   | 660               | 137               | 0.172       | 14513           | 1574              | 1573          | 0             | 0.000   | 22705           | 2581              | 2575          | 0             | 0.000   | 25337            | 3372               | 3366           | 0              | 0.000    |
| 307995 | 3   | 9517257   | 9517257   | G         | T       | SETD5           | nonsense                    | c.3811          | p.G1271*          | tier1 | 16932              | 2046                 | 2042             | 1                | 0.000      | 12666               | 1192                  | 986               | 197               | 0.167       | 16625           | 1771              | 1756          | 1             | 0.000   | 30581           | 3499              | 3493          | 0             | 0.000   | 40390            | 5238               | 5230           | 0              | 0.000    |
| 307995 | 3   | 30702951  | 30702951  | G         | A       | TGFBR2          | intronic                    | c.530-10179     | e5-10179          | tier4 | 21932              | 3088                 | 3087             | 1                | 0.000      | 12719               | 1402                  | 1136              | 255               | 0.183       | 19415           | 2486              | 2478          | 0             | 0.000   | 35761           | 4596              | 4593          | 1             | 0.000   | 44285            | 6232               | 6230           | 1              | 0.000    |
| 307995 | 3   | 126180517 | 126180517 | G         | A       | ZKDC            | missense                    | c.1988          | p.P663L           | tier1 | 26121              | 3489                 | 3479             | 3                | 0.001      | 17143               | 1897                  | 1582              | 303               | 0.161       | 19681           | 2031              | 2023          | 0             | 0.000   | 28774           | 2952              | 2950          | 1             | 0.000   | 46891            | 6709               | 6704           | 1              | 0.000    |
| 307995 | 4   | 107154095 | 107154095 | C         | A       | TBCK            | missense                    | c.1639          | p.G547C           | tier1 | 22774              | 2500                 | 2497             | 2                | 0.001      | 12234               | 1077                  | 886               | 186               | 0.174       | 17884           | 1895              | 1891          | 0             | 0.000   | 36704           | 3940              | 3938          | 0             | 0.000   | 38889            | 4788               | 4787           | 1              | 0.000    |
| 307995 | 5   | 5235176   | 5235176   | C         | T       | ADAMTS16        | missense                    | c.1900          | p.L634F           | tier1 | 41498              | 5993                 | 5982             | 1                | 0.000      | 24175               | 2732                  | 2248              | 461               | 0.170       | 28275           | 3291              | 3286          | 0             | 0.000   | 52906           | 6393              | 6393          | 0             | 0.000   | 64254            | 9267               | 9257           | 0              | 0.000    |
| 307995 | 5   | 14364017  | 14364017  | C         | A       | TRIO            | silent                      | c.2568          | p.V856            | tier1 | 11759              | 2486                 | 2485             | 0                | 0.000      | 8545                | 1420                  | 1183              | 229               | 0.162       | 7732            | 1311              | 1309          | 0             | 0.000   | 14980           | 2672              | 2669          | 1             | 0.000   | 20910            | 4722               | 4719           | 1              | 0.000    |
| 307995 | 5   | 140174742 | 140174742 | C         | T       | PCDHA2          | missense                    | c.193           | p.R65W            | tier1 | 10300              | 1723                 | 1722             | 1                | 0.001      | 5235                | 1925                  | 1496              | 96                | 0.162       | 5095            | 646               | 645           | 0             | 0.000   | 12490           | 1585              | 1583          | 0             | 0.000   | 14042            | 2508               | 2506           | 0              | 0.000    |
| 307995 | 6   | 38743672  | 38743672  | G         | A       | DNAH8           | missense                    | c.1256          | p.R419K           | tier1 | 12876              | 1538                 | 1531             | 0                | 0.000      | 7777                | 745                   | 677               | 64                | 0.086       | 11981           | 1279              | 1277          | 0             | 0.000   | 20259           | 2218              | 2218          | 0             | 0.000   | 25829            | 3434               | 3432           | 0              | 0.000    |
| 307995 | 7   | 29689532  | 29689532  | T         | A       | ZNRF2P2         | intronic                    | c.NULL          | NULL              | tier2 | 9555               | 1238                 | 1236             | 0                | 0.000      | 3907                | 344                   | 326               | 14                | 0.041       | 8708            | 1054              | 1053          | 0             | 0.000   | 15734           | 1964              | 1960          | 0             | 0.000   | 22140            | 2998               | 2995           | 0              | 0.000    |
| 307995 | 9   | 38414100  | 38414100  | C         | T       | IGFBP1          | silent                      | c.561           | p.T187            | tier1 | 850                | 0                    | 0                | 0                | 0.000      | 1029                | 101                   | 84                | 17                | 0.168       | 601             | 52                | 52            | 0             | 0.000   | 1054            | 73                | 73            | 0             | 0.000   | 2312             | 0                  | 0              | 0              | NA       |
| 307995 | 9   | 124737164 | 124737164 | T         | C       | TTL11           | missense                    | c.1634          | p.E545G           | tier1 | 4530               | 842                  | 841              | 0                | 0.000      | 3253                | 448                   | 363               | 82                | 0.184       | 2211            | 0                 | 0             | 0             | NA      | 4800            | 565               | 561           | 0             | 0.000   | 6841             | 0                  | 0              | 0              | NA       |
| 307995 | 11  | 67049830  | 67049830  | C         | G       | ADRBK1          | missense                    | c.1046          | p.A349G           | tier1 | 17607              | 2373                 | 2372             | 1                | 0.000      | 9871                | 930                   | 780               | 146               | 0.158       | 13509           | 1415              | 1412          | 1             | 0.000   | 24268           | 2672              | 2668          | 0             | 0.000   | 32239            | 4290               | 4286           | 0              | 0.000    |
| 307995 | 11  | 90016247  | 90016247  | G         | A       | ENSG00000214391 | 3_prime_untranslated_region | c.*90016247     | NULL              | tier2 | 9251               | 1416                 | 1410             | 1                | 0.001      | 5881                | 615                   | 505               | 109               | 0.178       | 8316            | 1001              | 997           | 0             | 0.000   | 14878           | 1962              | 1962          | 0             | 0.000   | 19995            | 3123               | 3120           | 0              | 0.000    |
| 307995 | 12  | 9095076   | 9095076   | C         | G       | M6PR            | missense                    | c.647           | p.G216A           | tier1 | 18052              | 2269                 | 2268             | 0                | 0.000      | 14745               | 1560                  | 1265              | 284               | 0.183       | 14814           | 1463              | 1459          | 0             | 0.000   | 26480           | 2763              | 2759          | 0             | 0.000   | 36033            | 4801               | 4793           | 1              | 0.000    |
| 307995 | 12  | 50027356  | 50027356  | G         | A       | PRPF40B         | intronic                    | c.580+26        | e8+26             | tier3 | 20184              | 2279                 | 2278             | 0                | 0.000      | 17274               | 1679                  | 1356              | 308               | 0.185       | 19082           | 1865              | 1862          | 0             | 0.000   | 38807           | 4116              | 4112          | 0             | 0.000   | 44347            | 5501               | 5499           | 0              | 0.000    |
| 307995 | 12  | 52715016  | 52715016  | G         | T       | KRT83           | missense                    | c.104           | p.A35D            | tier1 | 17872              | 2232                 | 2228             | 2                | 0.001      | 11270               | 1091                  | 906               | 174               | 0.161       | 14742           | 1522              | 1520          | 0             | 0.000   | 24864           | 2656              | 2656          | 0             | 0.000   | 30211            | 4075               | 4072           | 1              | 0.000    |
| 307995 | 12  | 52891238  | 52891238  | T         | A       | KRT6C           | 5_prime_flanking_region     | c.-23717        | NULL              | tier3 | 37827              | 4684                 | 4677             | 4                | 0.001      | 17563               | 1842                  | 1493              | 338               | 0.185       | 13579           | 4197              | 4197          | 0             | 0.000   | 59543           | 7510              | 7503          | 0             | 0.000   | 74155            | 9567               | 9558           | 0              | 0.000    |
| 307995 | 12  | 109519720 | 109519720 | C         | T       | USP30           | intronic                    | c.781-18        | e9-18             | tier3 | 18185              | 2137                 | 2136             | 1                | 0.000      | 14507               | 1438                  | 1220              | 204               | 0.143       | 21551           | 2264              | 2261          | 0             | 0.000   | 37214           | 4211              | 4209          | 0             | 0.000   | 51875            | 6669               | 6664           | 1              | 0.000    |
| 307995 | 14  | 94945375  | 94945375  | G         | A       | SERPINA9        | intronic                    | c.NULL          | NULL              | tier3 | 14412              | 2018                 | 2013             | 0                | 0.000      | 8542                | 927                   | 754               | 164               | 0.179       | 9099            | 884               | 881           | 0             | 0.000   | 12602           | 1228              | 1222          | 0             | 0.000   | 18950            | 2683               | 2678           | 0              | 0.000    |
| 307995 | 17  | 61986092  | 61986092  | G         | C       | GH2             | 5_prime_flanking_region     | c.-26931        | NULL              | tier3 | 7436               | 993                  | 993              | 0                | 0.000      | 5504                | 643                   | 532               | 107               | 0.167       | 4489            | 420               | 418           | 1             | 0.000   | 8630            | 980               | 978           | 0             | 0.000   | 11989            | 1814               | 1811           | 1              | 0.000    |
| 307995 | 18  | 50683690  | 50683690  | C         | T       | DCC             | intronic                    | c.1262-36       | e8-36             | tier3 | 7199               | 1369                 | 1368             | 1                | 0.001      | 7187                | 937                   | 779               | 156               | 0.167       | 6715            | 805               | 802           | 1             | 0.000   | 10471           | 1351              | 1349          | 1             | 0.000   | 15612            | 2820               | 2817           | 1              | 0.000    |
| 307995 | 20  | 47247205  | 47247205  | C         | T       | PREX1           | intronic                    | c.4593+61       | e36+61            | tier3 | 53682              | 6200                 | 6199             | 0                | 0.000      | 29856               | 2963                  | 2421              | 515               | 0.175       | 41606           | 4321              | 4313          | 1             | 0.000   | 80057           | 9181              | 9177          | 0             | 0.000   | 100875           | 12640              | 12635          | 2              | 0.000    |
| 307995 | 20  | 56082765  | 56082765  | C         | T       | CTCFL           | silent                      | c.1326          | p.P442            | tier1 | 46865              | 5735                 | 5729             | 3                | 0.001      | 18320               | 1737                  | 1393              | 333               | 0.193       | 36410           | 4191              | 4180          | 2             | 0.000   | 72397           | 9117              | 9111          | 0             | 0.000   | 87757            | 11408              | 11399          | 0              | 0.000    |
| 307995 | 20  | 58349240  | 58349240  | G         | A       | PHACTR3         | intronic                    | c.927-58        | e7-58             | tier3 | 9829               | 1423                 | 1419             | 1                | 0.001      | 6694                | 832                   | 688               | 143               | 0.172       | 7166            | 850               | 848           | 0             | 0.000   | 11139           | 1465              | 1464          | 0             | 0.000   | 15974            | 2886               | 2880           | 1              | 0.000    |
| 307995 | 22  | 20171118  | 20171118  | G         | T       | LINC00896       | 5_prime_flanking_region     | c.-22982        | NULL              | tier3 | 41685              | 5144                 | 5137             | 2                | 0.000      | 27941               | 2833                  | 2333              | 468               | 0.167       | 35577           | 3647              | 3638          | 0             | 0.000   | 64807           | 7402              | 7398          | 0             | 0.000   | 82450            | 10682              | 10662          | 1              | 0.000    |
| 307995 | X   | 39911641  | 39911641  | C         | T       | BCOR            | nonsense                    | c.4989          | p.W1663*          | tier1 | 2771               | 0                    | 0                | 0                | 0.000      | 1661                | 163                   | 120               | 42                | 0.259       | 2252            | 209               | 209           | 0             | 0.000   | 3184            | 355               | 354           | 0             | 0.000   | 4228             | 0                  | 0              | 0              | NA       |
| 307995 | X   | 53574723  | 53574723  | G         | T       | HUWE1           | missense                    | c.10547         | p.A3516D          | tier1 | 4030               | 855                  | 853              | 1                | 0.001      | 3570                | 485                   | 322               | 160               | 0.332       | 2956            | 479               | 477           | 0             | 0.000   | 6543            | 1022              | 1021          | 0             | 0.000   | 8509             | 1948               | 1947           | 1              | 0.000    |
| 307995 | X   | 151336800 | 151336800 | C         | T       | GABRA3          | missense                    | c.1379          | p.R460H           | tier1 | 20311              | 2431                 | 2425             | 4                | 0.002      | 16974               | 1748                  | 1243              | 482               | 0.279       | 22921           | 2528              | 2526          | 0             | 0.000   | 43526           | 5186              | 5172          | 1             | 0.000   | 59634            | 7616               | 7603           | 1              | 0.000    |
| 311426 | 1   | 15987264  | 15987264  | T         | C       | RSC1A1          | silent                      | c.901           | p.L301            | tier1 | 11236              | 1410                 | 1362             | 48               | 0.034      | 13278               | 1685                  | 958               | 720               | 0.429       | NA              | NA                | NA            | NA            | NA      | 17268           | 2601              | 2577          | 12            | 0.005   | 10555            | 751                | 693            | 54             | 0.072    |
| 311426 | 1   | 23660085  | 23660085  | T         | C       | HNRNP1          | missense                    | c.424           | p.T142A           | tier1 | 34856              | 4681                 | 4522             | 155              | 0.033      | 31282               | 4074                  | 2318              | 1713              | 0.245       | NA              | NA                | NA            | NA            | NA      | 40078           | 5587              | 5558          | 18            | 0.003   | 35251            | 2705               | 2676           | 23             | 0.009    |
| 311426 | 1   | 26795865  | 26795865  | A         | G       | DHDDS           | 3_prime_untranslated_region | c.*243          | NULL              | tier3 | 18900              | 2359                 | 2222             | 133              | 0.056      | 37140               | 4742                  | 2588              | 2089              | 0.447       | NA              | NA                | NA            | NA            | NA      | 56774           | 7787              | 7730          | 37            | 0.005   | 42915            | 3349               | 2143           | 11             |          |



| UPN    | Chr | Start     | Stop      | Reference | Variant | Gene Symbol       | Mutation Type               | Coding Position | Amino Acid Change | Tier  | Normal Total Count | Normal Unique Count* | Normal Ref Count | Normal Var Count | Normal VAF | Initial Total Count | Initial Unique Count* | Initial Ref Count | Initial Var Count | Initial VAF | Pre Total Count | Pre Unique Count* | Pre Ref Count | Pre Var Count | Pre VAF | D30 Total Count | D30 Unique Count* | D30 Ref Count | D30 Var Count | D30 VAF | D100 Total Count | D100 Unique Count* | D100 Ref Count | D100 Var Count | D100 VAF |
|--------|-----|-----------|-----------|-----------|---------|-------------------|-----------------------------|-----------------|-------------------|-------|--------------------|----------------------|------------------|------------------|------------|---------------------|-----------------------|-------------------|-------------------|-------------|-----------------|-------------------|---------------|---------------|---------|-----------------|-------------------|---------------|---------------|---------|------------------|--------------------|----------------|----------------|----------|
| 346313 | 1   | 115258744 | 115258744 | C         | T       | <i>NRAS</i>       | missense                    | c.38            | p.G13D            | tier1 | 15135              | 2345                 | 2345             | 0                | 0.000      | 22148               | 2769                  | 1917              | 817               | 0.299       | 9508            | 75                | 44            | 31            | 0.413   | 12656           | 1666              | 1659          | 1             | 0.000   | NA               | NA                 | NA             | NA             | NA       |
| 346313 | 1   | 185815276 | 185815276 | G         | A       | <i>HMCN1</i>      | intronic                    | c.339+48        | e2+48             | tier3 | 6596               | 904                  | 899              | 5                | 0.006      | 9266                | 1023                  | 626               | 388               | 0.383       | 6413            | 50                | 30            | 20            | 0.400   | 5756            | 719               | 712           | 1             | 0.000   | NA               | NA                 | NA             | NA             | NA       |
| 346313 | 1   | 237494338 | 237494338 | G         | A       | <i>RYR2</i>       | intronic                    | c.270+52        | e4+52             | tier3 | 6976               | 0                    | 0                | 0                | 0.000      | 10457               | 1484                  | 1109              | 367               | 0.249       | 4945            | 59                | 39            | 20            | 0.339   | 9559            | 1403              | 1398          | 3             | 0.000   | NA               | NA                 | NA             | NA             | NA       |
| 346313 | 2   | 79914651  | 79914651  | C         | T       | <i>CTNNA2</i>     | intronic                    | c.204+35867     | e2+35867          | tier3 | 8130               | 1132                 | 1127             | 4                | 0.004      | 7887                | 997                   | 599               | 392               | 0.396       | 9373            | 58                | 31            | 27            | 0.466   | 10541           | 1507              | 1504          | 1             | 0.000   | NA               | NA                 | NA             | NA             | NA       |
| 346313 | 2   | 95976762  | 95976762  | G         | A       | <i>KCNIP3</i>     | 3_prime_untranslated_region | c.*95976762     | NULL              | tier3 | 14797              | 1887                 | 1879             | 8                | 0.004      | 12604               | 1599                  | 937               | 647               | 0.408       | 8658            | 46                | 21            | 24            | 0.533   | 13523           | 1768              | 1765          | 0             | 0.000   | NA               | NA                 | NA             | NA             | NA       |
| 346313 | 2   | 97493997  | 97493997  | C         | T       | <i>CNNM3</i>      | 3_prime_untranslated_region | c.*97493997     | NULL              | tier3 | 17734              | 2331                 | 2323             | 7                | 0.003      | 16375               | 1841                  | 1134              | 695               | 0.380       | 16681           | 97                | 58            | 39            | 0.402   | 17673           | 2370              | 2365          | 4             | 0.000   | NA               | NA                 | NA             | NA             | NA       |
| 346313 | 2   | 103148926 | 103148926 | G         | A       | <i>SLC9A4</i>     | missense                    | c.2176          | p.G726S           | tier1 | 15907              | 2288                 | 2279             | 9                | 0.004      | 18575               | 2517                  | 1566              | 930               | 0.373       | 9661            | 60                | 38            | 22            | 0.367   | 17004           | 2467              | 2463          | 1             | 0.000   | NA               | NA                 | NA             | NA             | NA       |
| 346313 | 2   | 198267359 | 198267359 | C         | A       | <i>SF3B1</i>      | missense                    | c.1998          | p.K666N           | tier1 | 1971               | 484                  | 484              | 0                | 0.000      | 3428                | 660                   | 449               | 211               | 0.320       | 1140            | 27                | 20            | 7             | 0.259   | 1344            | 284               | 283           | 0             | 0.000   | NA               | NA                 | NA             | NA             | NA       |
| 346313 | 3   | 124180873 | 124180873 | A         | G       | <i>KALRN</i>      | intronic                    | c.3915+70       | e24+70            | tier3 | 6616               | 1154                 | 1153             | 0                | 0.000      | 8408                | 1184                  | 818               | 352               | 0.301       | 3526            | 41                | 29            | 12            | 0.293   | 4038            | 543               | 541           | 0             | 0.000   | NA               | NA                 | NA             | NA             | NA       |
| 346313 | 3   | 157363624 | 157363624 | A         | T       | <i>C3orf55</i>    | nonsense                    | c.151           | p.K51*            | tier1 | 12912              | 2008                 | 2005             | 3                | 0.001      | 12504               | 1663                  | 998               | 656               | 0.397       | 11554           | 80                | 52            | 28            | 0.350   | 17018           | 2350              | 2344          | 1             | 0.000   | NA               | NA                 | NA             | NA             | NA       |
| 346313 | 3   | 185362401 | 185362401 | C         | T       | <i>IGF2BP2</i>    | 3_prime_untranslated_region | c.*918          | NULL              | tier3 | 3106               | 473                  | 470              | 2                | 0.004      | 3119                | 384                   | 193               | 188               | 0.493       | 2875            | 20                | 11            | 9             | 0.450   | 4110            | 620               | 615           | 0             | 0.000   | NA               | NA                 | NA             | NA             | NA       |
| 346313 | 4   | 47888007  | 47888007  | T         | C       | <i>NFXL1</i>      | missense                    | c.1553          | p.Y518C           | tier1 | 7936               | 1262                 | 1261             | 1                | 0.001      | 10623               | 1323                  | 793               | 524               | 0.398       | 9853            | 74                | 41            | 33            | 0.446   | 12932           | 1797              | 1792          | 1             | 0.000   | NA               | NA                 | NA             | NA             | NA       |
| 346313 | 5   | 180659955 | 180659955 | C         | T       | <i>TRIM41</i>     | 3_prime_untranslated_region | c.*180659955    | NULL              | tier3 | 6908               | 1005                 | 1001             | 3                | 0.003      | 8436                | 948                   | 681               | 263               | 0.279       | 2747            | 24                | 19            | 5             | 0.208   | 6031            | 819               | 818           | 0             | 0.000   | NA               | NA                 | NA             | NA             | NA       |
| 346313 | 7   | 141794384 | 141794384 | G         | A       | <i>MGAM</i>       | intronic                    | c.4619-36       | e38-36            | tier3 | 3954               | 754                  | 745              | 9                | 0.012      | 9432                | 1324                  | 227               | 1086              | 0.827       | 8804            | 44                | 12            | 32            | 0.727   | 19245           | 2505              | 2495          | 2             | 0.000   | NA               | NA                 | NA             | NA             | NA       |
| 346313 | 8   | 39111964  | 39111964  | C         | T       | <i>ADAM32</i>     | missense                    | c.1934          | p.S645L           | tier1 | 2218               | 306                  | 305              | 1                | 0.003      | 2951                | 311                   | 201               | 108               | 0.350       | 1323            | 11                | 6             | 5             | 0.455   | 2929            | 348               | 345           | 1             | 0.000   | NA               | NA                 | NA             | NA             | NA       |
| 346313 | 8   | 56362027  | 56362027  | G         | A       | <i>XKR4</i>       | intronic                    | c.1007-73813    | e3-73813          | tier2 | 10991              | 1801                 | 1799             | 2                | 0.001      | 19862               | 2655                  | 1622              | 1018              | 0.386       | 6570            | 45                | 32            | 13            | 0.289   | 10399           | 1572              | 1571          | 1             | 0.000   | NA               | NA                 | NA             | NA             | NA       |
| 346313 | 9   | 2058252   | 2058252   | A         | T       | <i>SMARCA2</i>    | intronic                    | c.1348-39       | e7-39             | tier3 | 6687               | 1167                 | 1166             | 1                | 0.001      | 12790               | 1563                  | 924               | 626               | 0.404       | 3677            | 28                | 20            | 8             | 0.286   | 7690            | 1002              | 997           | 1             | 0.000   | NA               | NA                 | NA             | NA             | NA       |
| 346313 | 9   | 116770653 | 116770653 | C         | T       | <i>ZNF618</i>     | missense                    | c.670           | p.R224W           | tier1 | 23849              | 3026                 | 3015             | 11               | 0.004      | 27911               | 3504                  | 1840              | 1188              | 0.392       | 21495           | 115               | 70            | 45            | 0.391   | 29547           | 3875              | 3864          | 3             | 0.000   | NA               | NA                 | NA             | NA             | NA       |
| 346313 | 9   | 139848263 | 139848263 | G         | C       | <i>LCN12</i>      | rna                         | NULL            | NULL              | tier1 | 4511               | 1130                 | 1128             | 2                | 0.002      | 5237                | 1046                  | 627               | 416               | 0.399       | 1844            | 25                | 20            | 5             | 0.200   | 1463            | 327               | 325           | 0             | 0.000   | NA               | NA                 | NA             | NA             | NA       |
| 346313 | 10  | 43612131  | 43612131  | C         | T       | <i>RET</i>        | silent                      | c.2236          | p.L746            | tier1 | 11710              | 1924                 | 1921             | 3                | 0.002      | 12939               | 1785                  | 1093              | 678               | 0.383       | 7954            | 54                | 30            | 24            | 0.444   | 8090            | 1127              | 1127          | 0             | 0.000   | NA               | NA                 | NA             | NA             | NA       |
| 346313 | 10  | 71631922  | 71631922  | C         | T       | <i>COL13A1</i>    | splice_region               | c.365-10        | e3-10             | tier3 | 6454               | 0                    | 0                | 0                | 0.000      | 5986                | 868                   | 573               | 287               | 0.334       | 4679            | 34                | 23            | 11            | 0.324   | 2959            | 550               | 547           | 0             | 0.000   | NA               | NA                 | NA             | NA             | NA       |
| 346313 | 11  | 32413565  | 32413565  | C         | T       | <i>WT1</i>        | missense                    | c.1385          | p.R462Q           | tier1 | 1659               | 0                    | 0                | 0                | 0.000      | 1890                | 218                   | 131               | 86                | 0.396       | 1176            | 13                | 7             | 6             | 0.462   | 729             | 82                | 80            | 0             | 0.000   | NA               | NA                 | NA             | NA             | NA       |
| 346313 | 11  | 66330311  | 66330311  | C         | T       | <i>ACTN3</i>      | silent                      | c.2562          | p.N854            | tier1 | 25840              | 3654                 | 3646             | 4                | 0.001      | 26088               | 3426                  | 2080              | 1320              | 0.388       | 15836           | 115               | 75            | 40            | 0.446   | 22332           | 3070              | 3063          | 3             | 0.000   | NA               | NA                 | NA             | NA             | NA       |
| 346313 | 11  | 74880778  | 74880778  | C         | T       | <i>SLCO2B1</i>    | silent                      | c.750           | p.R250            | tier1 | 12979              | 2156                 | 2152             | 4                | 0.002      | 17961               | 2483                  | 1507              | 942               | 0.385       | 6260            | 44                | 25            | 19            | 0.432   | 9284            | 1391              | 1384          | 0             | 0.000   | NA               | NA                 | NA             | NA             | NA       |
| 346313 | 12  | 22606832  | 22606832  | G         | C       | <i>CZCD5</i>      | missense                    | c.2869          | p.Q957E           | tier1 | 10580              | 1420                 | 1415             | 4                | 0.003      | 11566               | 1283                  | 914               | 362               | 0.284       | 6766            | 56                | 43            | 13            | 0.232   | 17261           | 2289              | 2288          | 0             | 0.000   | NA               | NA                 | NA             | NA             | NA       |
| 346313 | 12  | 112926910 | 112926910 | G         | C       | <i>PTPN11</i>     | missense                    | c.1530          | p.Q510H           | tier1 | 18281              | 2384                 | 2384             | 0                | 0.000      | 17722               | 2050                  | 1967              | 67                | 0.033       | 8551            | 50                | 50            | 0             | 0.000   | 15428           | 2108              | 2098          | 2             | 0.000   | NA               | NA                 | NA             | NA             | NA       |
| 346313 | 12  | 133384599 | 133384599 | C         | T       | <i>GOLGA3</i>     | silent                      | c.1056          | p.A352            | tier1 | 20252              | 2717                 | 2714             | 3                | 0.001      | 18422               | 2142                  | 1324              | 795               | 0.375       | 8874            | 61                | 39            | 22            | 0.361   | 14650           | 1946              | 1944          | 0             | 0.000   | NA               | NA                 | NA             | NA             | NA       |
| 346313 | 13  | 95363388  | 95363388  | G         | A       | <i>SOX21</i>      | 3_prime_untranslated_region | c.*85           | NULL              | tier2 | 10957              | 1679                 | 1673             | 3                | 0.002      | 9798                | 1204                  | 751               | 447               | 0.373       | 8922            | 64                | 35            | 29            | 0.453   | 11181           | 1486              | 1484          | 1             | 0.000   | NA               | NA                 | NA             | NA             | NA       |
| 346313 | 13  | 99030086  | 99030086  | C         | T       | <i>FARP1</i>      | missense                    | c.410           | p.A137V           | tier1 | 10284              | 1799                 | 1794             | 5                | 0.003      | 13249               | 1897                  | 1169              | 718               | 0.381       | 5654            | 44                | 28            | 16            | 0.364   | 13410           | 1963              | 1958          | 2             | 0.000   | NA               | NA                 | NA             | NA             | NA       |
| 346313 | 14  | 38274022  | 38274022  | A         | T       | <i>TTCC6</i>      | splice_region               | c.357+3         | e3+3              | tier3 | 11618              | 1556                 | 1555             | 0                | 0.000      | 14057               | 1605                  | 1126              | 467               | 0.293       | 10576           | 81                | 56            | 25            | 0.309   | 15067           | 1903              | 1899          | 0             | 0.000   | NA               | NA                 | NA             | NA             | NA       |
| 346313 | 14  | 70442537  | 70442537  | G         | A       | <i>SMOC1</i>      | splice_region               | c.478+6         | e4+6              | tier2 | 9708               | 1305                 | 1303             | 1                | 0.001      | 11480               | 1164                  | 833               | 324               | 0.280       | 10514           | 77                | 51            | 26            | 0.338   | 11093           | 1380              | 1375          | 2             | 0.000   | NA               | NA                 | NA             | NA             | NA       |
| 346313 | 14  | 101429460 | 101429460 | A         | T       | <i>SNORD114-7</i> | rna                         | NULL            | NULL              | tier1 | 1456               | 395                  | 394              | 1                | 0.003      | 858                 | 143                   | 82                | 61                | 0.427       | 453             | 9                 | 4             | 5             | NA      | 714             | 139               | 138           | 0             | 0.000   | NA               | NA                 | NA             | NA             | NA       |
| 346313 | 16  | 790001    | 790001    | G         | A       | <i>NARFL</i>      | 5_prime_untranslated_region | c.-3603         | NULL              | tier3 | 23157              | 3246                 | 3238             | 3                | 0.001      | 15854               | 1949                  | 1462              | 460               | 0.239       | 4948            | 30                | 28            | 2             | 0.000   | 16881           | 2183              | 2175          | 2             | 0.000   | NA               | NA                 | NA             | NA             | NA       |
| 346313 | 19  | 35991219  | 35991219  | T         | C       | <i>DMKN</i>       | 5_prime_untranslated_region | c.-35991219     | NULL              | tier3 | 7531               | 1700                 | 1694             | 3                | 0.002      | 7260                | 1150                  | 677               | 463               | 0.406       | 2283            | 31                | 22            | 9             | 0.290   | 1591            | 251               | 248           | 0             | 0.000   | NA               | NA                 | NA             | NA             | NA       |
| 346313 | 19  | 38782452  | 38782452  | C         | T       | <i>SPINT2</i>     | 3_prime_untranslated_region | c.*38782452     | NULL              | tier3 | 11953              | 1849                 | 1845             | 4                | 0.002      | 16199               | 2163                  | 1360              | 788               | 0.367       | 8989            | 44                | 31            | 13            | 0.295   | 12445           | 1704              | 1698          | 2             | 0.000   | NA               | NA                 | NA             | NA             |          |

| UPN    | Chr | Start     | Stop      | Reference | Variant | Gene Symbol     | Mutation Type               | Coding Position | Amino Acid Change | Tier  | Normal Total Count | Normal Unique Count* | Normal Ref Count | Normal Var Count | Normal VAF | Initial Total Count | Initial Unique Count* | Initial Ref Count | Initial Var Count | Initial VAF | Pre Total Count | Pre Unique Count* | Pre Ref Count | Pre Var Count | Pre VAF | D30 Total Count | D30 Unique Count* | D30 Ref Count | D30 Var Count | D30 VAF | D100 Total Count | D100 Unique Count* | D100 Ref Count | D100 Var Count | D100 VAF |
|--------|-----|-----------|-----------|-----------|---------|-----------------|-----------------------------|-----------------|-------------------|-------|--------------------|----------------------|------------------|------------------|------------|---------------------|-----------------------|-------------------|-------------------|-------------|-----------------|-------------------|---------------|---------------|---------|-----------------|-------------------|---------------|---------------|---------|------------------|--------------------|----------------|----------------|----------|
| 377158 | 7   | 44268486  | 44268486  | C         | T       | CAMK2B          | silent                      | c.1377          | p.R459            | tier1 | 31191              | 3768                 | 3745             | 19               | 0.005      | 19872               | 2875                  | 1857              | 996               | 0.349       | 22934           | 2598              | 1604          | 971           | 0.377   | 24679           | 2025              | 2016          | 0             | 0.000   | NA               | NA                 | NA             | NA             | NA       |
| 377158 | 8   | 16166004  | 16166004  | C         | T       | DLGAP2          | missense                    | c.1730          | p.T577M           | tier1 | 15778              | 2105                 | 2028             | 76               | 0.036      | 9926                | 1438                  | 870               | 567               | 0.395       | 12449           | 1643              | 894           | 744           | 0.454   | 10886           | 1208              | 1207          | 0             | 0.000   | NA               | NA                 | NA             | NA             | NA       |
| 377158 | 8   | 93029456  | 93029456  | G         | A       | RUNX1T1         | missense                    | c.257           | p.T86M            | tier1 | 27247              | 3518                 | 3500             | 16               | 0.005      | 13337               | 1840                  | 1085              | 749               | 0.408       | 16786           | 2071              | 1165          | 889           | 0.433   | 15475           | 1318              | 1317          | 0             | 0.000   | NA               | NA                 | NA             | NA             | NA       |
| 377158 | 10  | 125521468 | 125521468 | C         | A       | CPXM2           | missense                    | c.1697          | p.R566L           | tier1 | 33234              | 4104                 | 4081             | 17               | 0.004      | 16084               | 2218                  | 1289              | 921               | 0.417       | 19750           | 2413              | 1228          | 1167          | 0.487   | 17617           | 1314              | 1313          | 1             | 0.000   | NA               | NA                 | NA             | NA             | NA       |
| 377158 | 11  | 132177495 | 132177495 | A         | G       | NTM             | intronic                    | c.527-88        | e5-88             | tier3 | 28441              | 4036                 | 4028             | 6                | 0.001      | 11035               | 1798                  | 1189              | 599               | 0.335       | 12341           | 1711              | 1086          | 615           | 0.362   | 15135           | 1756              | 1754          | 0             | 0.000   | NA               | NA                 | NA             | NA             | NA       |
| 377158 | 12  | 53439709  | 53439709  | C         | T       | LOC283335       | intronic                    | c.NULL          | NULL              | tier3 | 7825               | 1595                 | 1585             | 8                | 0.005      | 6157                | 1216                  | 747               | 462               | 0.382       | 5787            | 1148              | 636           | 510           | 0.445   | 6550            | 1008              | 1004          | 0             | 0.000   | NA               | NA                 | NA             | NA             | NA       |
| 377158 | 14  | 20216351  | 20216351  | C         | T       | ORAQ3           | silent                      | c.765           | p.C255            | tier1 | 62824              | 8606                 | 8581             | 21               | 0.002      | 35001               | 5096                  | 3330              | 1744              | 0.344       | 42145           | 5873              | 3768          | 2041          | 0.351   | 37687           | 2135              | 2134          | 0             | 0.000   | NA               | NA                 | NA             | NA             | NA       |
| 377158 | 14  | 38296537  | 38296537  | G         | A       | TTC6            | missense                    | c.1457          | p.G486E           | tier1 | 11863              | 1418                 | 1416             | 2                | 0.001      | 5038                | 661                   | 514               | 146               | 0.221       | 7275            | 826               | 635           | 190           | 0.230   | 9058            | 682               | 678           | 0             | 0.000   | NA               | NA                 | NA             | NA             | NA       |
| 377158 | 14  | 94750258  | 94750258  | A         | T       | SERPINA10       | 3_prime_untranslated_region | c.*44           | NULL              | tier3 | 8996               | 1348                 | 1344             | 4                | 0.003      | 4692                | 846                   | 620               | 225               | 0.266       | 5827            | 917               | 616           | 298           | 0.326   | 7137            | 775               | 770           | 0             | 0.000   | NA               | NA                 | NA             | NA             | NA       |
| 377158 | 16  | 67242195  | 67242195  | C         | T       | LRRC29          | intronic                    | c.285+20        | e2+20             | tier3 | 8952               | 1373                 | 1365             | 7                | 0.005      | 16228               | 2461                  | 1502              | 941               | 0.385       | 17279           | 2332              | 1324          | 1389          | 0.427   | 13870           | 1272              | 1270          | 0             | 0.000   | NA               | NA                 | NA             | NA             | NA       |
| 377158 | 17  | 37901877  | 37901877  | C         | A       | GRB7            | intronic                    | c.1278+86       | e11+86            | tier3 | 16607              | 2191                 | 2180             | 8                | 0.004      | 9627                | 1320                  | 807               | 509               | 0.387       | 10492           | 1311              | 763           | 534           | 0.412   | 8051            | 460               | 460           | 0             | 0.000   | NA               | NA                 | NA             | NA             | NA       |
| 377158 | 17  | 48653205  | 48653205  | G         | A       | CACNA1G         | missense                    | c.1442          | p.S481N           | tier1 | 9770               | 1740                 | 1735             | 5                | 0.003      | 11808               | 1725                  | 1037              | 683               | 0.397       | 12564           | 1917              | 1026          | 876           | 0.461   | 9331            | 842               | 842           | 0             | 0.000   | NA               | NA                 | NA             | NA             | NA       |
| 377158 | 19  | 12221114  | 12221114  | T         | C       | ENSG00000188474 | splice_region               | c.1-6           | e1-6              | tier3 | 7396               | 1332                 | 1325             | 5                | 0.004      | 9178                | 1894                  | 1189              | 699               | 0.370       | 9686            | 1822              | 1117          | 694           | 0.383   | 8348            | 1197              | 1195          | 0             | 0.000   | NA               | NA                 | NA             | NA             | NA       |
| 377158 | 19  | 16008165  | 16008165  | G         | A       | CYP4F2          | intronic                    | c.198+59        | e1+59             | tier3 | 3096               | 291                  | 279              | 12               | 0.041      | 2033                | 290                   | 229               | 57                | 0.199       | 2418            | 217               | 192           | 24            | 0.111   | 3932            | 493               | 490           | 1             | 0.000   | NA               | NA                 | NA             | NA             | NA       |
| 377158 | 19  | 33792822  | 33792822  | C         | A       | CEBPA           | nonsense                    | c.499           | p.E167*           | tier1 | 13866              | 1815                 | 1811             | 4                | 0.002      | 7305                | 1070                  | 998               | 71                | 0.066       | 8461            | 1146              | 1041          | 103           | 0.090   | 9772            | 666               | 665           | 0             | 0.000   | NA               | NA                 | NA             | NA             | NA       |
| 377158 | 20  | 33573852  | 33573852  | T         | C       | MYH7B           | intronic                    | c.932-51        | e12-51            | tier3 | 21988              | 3958                 | 3933             | 22               | 0.006      | 21653               | 3676                  | 2260              | 1395              | 0.382       | 25678           | 3746              | 2188          | 1507          | 0.408   | 19145           | 1491              | 1489          | 0             | 0.000   | NA               | NA                 | NA             | NA             | NA       |
| 377158 | 21  | 36231773  | 36231773  | C         | T       | RUNX1           | missense                    | c.611           | p.R204Q           | tier1 | 40567              | 5888                 | 5865             | 20               | 0.003      | 21930               | 3339                  | 2312              | 1004              | 0.303       | 24949           | 3385              | 2261          | 1093          | 0.326   | 25246           | 2469              | 2464          | 0             | 0.000   | NA               | NA                 | NA             | NA             | NA       |
| 377158 | 21  | 39672197  | 39672197  | T         | C       | KCNK15          | silent                      | c.1014          | p.D338            | tier1 | 11992              | 1306                 | 1297             | 6                | 0.005      | 8572                | 1316                  | 797               | 513               | 0.392       | 9267            | 1048              | 623           | 419           | 0.402   | 11157           | 882               | 881           | 0             | 0.000   | NA               | NA                 | NA             | NA             | NA       |
| 377158 | 21  | 44514777  | 44514777  | T         | G       | UZAF1           | missense                    | c.470           | p.Q157P           | tier1 | 82039              | 9989                 | 9944             | 40               | 0.004      | 49155               | 6122                  | 3547              | 2538              | 0.417       | 55897           | 6555              | 3561          | 2916          | 0.450   | 43879           | 2129              | 2126          | 0             | 0.000   | NA               | NA                 | NA             | NA             | NA       |
| 377158 | 21  | 44838927  | 44838927  | G         | A       | SIK1            | missense                    | c.1436          | p.T479I           | tier1 | 26814              | 3642                 | 3635             | 6                | 0.002      | 19946               | 3328                  | 1988              | 1334              | 0.402       | 22098           | 3416              | 1998          | 1389          | 0.410   | 21113           | 1921              | 1919          | 1             | 0.000   | NA               | NA                 | NA             | NA             | NA       |
| 377158 | 22  | 40425476  | 40425476  | G         | A       | FAM83F          | intronic                    | c.1454-44       | e5-44             | tier3 | 34812              | 4648                 | 4507             | 131              | 0.028      | 26490               | 3367                  | 1999              | 1351              | 0.403       | 30682           | 4106              | 2159          | 1897          | 0.468   | 26129           | 1479              | 1476          | 0             | 0.000   | NA               | NA                 | NA             | NA             | NA       |
| 377158 | X   | 54948751  | 54948751  | G         | A       | TRO             | 5_prime_untranslated_region | c.-347          | NULL              | tier3 | 37994              | 5332                 | 5310             | 13               | 0.002      | 19061               | 2629                  | 1655              | 954               | 0.366       | 21036           | 2797              | 1648          | 1114          | 0.403   | 9334            | 684               | 681           | 0             | 0.000   | NA               | NA                 | NA             | NA             | NA       |
| 377158 | X   | 62974526  | 62974526  | G         | A       | ARHGEF9         | rna                         | NULL            | NULL              | tier1 | 43937              | 6008                 | 5985             | 20               | 0.003      | 21090               | 2911                  | 1755              | 1143              | 0.394       | 25009           | 3235              | 1844          | 1370          | 0.426   | 10902           | 688               | 688           | 0             | 0.000   | NA               | NA                 | NA             | NA             | NA       |
| 377158 | X   | 152826317 | 152826317 | C         | A       | ATP2B3          | missense                    | c.3023          | p.T1008N          | tier1 | 92654              | 12135                | 12117            | 9                | 0.001      | 46732               | 5759                  | 4027              | 1702              | 0.297       | 50740           | 6400              | 4392          | 1959          | 0.308   | 23593           | 942               | 942           | 0             | 0.000   | NA               | NA                 | NA             | NA             | NA       |
| 378511 | 1   | 38185727  | 38185727  | C         | T       | EPHA10          | missense                    | c.2416          | p.G806S           | tier1 | 21546              | 2925                 | 2920             | 1                | 0.000      | 18962               | 1928                  | 1164              | 758               | 0.394       | NA              | NA                | NA            | NA            | NA      | 30926           | 3276              | 3272          | 0             | 0.000   | 23367            | 3297               | 3288           | 3              | 0.000    |
| 378511 | 1   | 103471831 | 103471831 | T         | A       | COL11A1         | missense                    | c.1760          | p.K587I           | tier1 | 1429               | 0                    | 0                | 0                | 0.000      | 1611                | 288                   | 222               | 66                | 0.229       | NA              | NA                | NA            | NA            | NA      | 2658            | 183               | 183           | 0             | 0.000   | 1680             | 217                | 216            | 0              | 0.000    |
| 378511 | 1   | 159505705 | 159505705 | G         | C       | OR10J5          | missense                    | c.93            | p.F31L            | tier1 | 3661               | 659                  | 658              | 0                | 0.000      | 13904               | 1999                  | 1476              | 511               | 0.257       | NA              | NA                | NA            | NA            | NA      | 15527           | 1741              | 1739          | 0             | 0.000   | 15301            | 2267               | 2260           | 1              | 0.000    |
| 378511 | 1   | 215990362 | 215990362 | T         | C       | USH2A           | missense                    | c.9547          | p.I3183V          | tier1 | 14189              | 1685                 | 1684             | 1                | 0.001      | 16726               | 1755                  | 889               | 862               | 0.492       | NA              | NA                | NA            | NA            | NA      | 25758           | 2729              | 2728          | 0             | 0.000   | 22257            | 2928               | 2913           | 1              | 0.000    |
| 378511 | 1   | 218458652 | 218458652 | C         | T       | RRP15           | 5_prime_untranslated_region | c.-7            | NULL              | tier2 | 12418              | 1616                 | 1615             | 0                | 0.000      | 13735               | 1749                  | 1315              | 420               | 0.242       | NA              | NA                | NA            | NA            | NA      | 16938           | 1787              | 1783          | 1             | 0.000   | 16115            | 2104               | 2103           | 1              | 0.000    |
| 378511 | 2   | 10797867  | 10797867  | C         | T       | NOL10           | splice_site                 | c.906+1         | e11+1             | tier1 | 806                | 0                    | 0                | 0                | 0.000      | 1567                | 294                   | 199               | 94                | 0.321       | NA              | NA                | NA            | NA            | NA      | 960             | 117               | 116           | 1             | 0.000   | 837              | 0                  | 0              | 0              | 0.000    |
| 378511 | 2   | 89246763  | 89246763  | C         | A       | IGKV7-3         | 5_prime_flanking_region     | c.-31869        | NULL              | tier3 | 850                | 178                  | 177              | 0                | 0.000      | 1668                | 263                   | 165               | 98                | 0.373       | NA              | NA                | NA            | NA            | NA      | 1504            | 199               | 199           | 0             | 0.000   | 1151             | 237                | 237            | 0              | 0.000    |
| 378511 | 2   | 127805801 | 127805801 | G         | A       | BIN1            | 5_prime_untranslated_region | c.-127805801    | NULL              | tier3 | 10081              | 1171                 | 1169             | 0                | 0.000      | 6982                | 753                   | 456               | 295               | 0.393       | NA              | NA                | NA            | NA            | NA      | 14152           | 1420              | 1420          | 0             | 0.000   | 11943            | 1540               | 1538           | 1              | 0.000    |
| 378511 | 2   | 191366422 | 191366422 | T         | A       | MFSD6           | 3_prime_untranslated_region | c.*1478         | NULL              | tier3 | 11321              | 1652                 | 1650             | 1                | 0.001      | 10329               | 1372                  | 935               | 430               | 0.315       | NA              | NA                | NA            | NA            | NA      | 17494           | 1967              | 1967          | 0             | 0.000   | 19206            | 2853               | 2838           | 0              | 0.000    |
| 378511 | 4   | 70826715  | 70826715  | G         | T       | CSN2            | 5_prime_untranslated_region | c.-2            | NULL              | tier3 | 7585               | 1007                 | 1004             | 0                | 0.000      | 4801                | 516                   | 339               | 176               | 0.342       | NA              | NA                | NA            | NA            | NA      | 9615            | 1042              | 1042          | 0             | 0.000   | 7253             | 931                | 926            | 3              | 0.000    |
| 378511 | 4   | 85562062  | 85562062  | C         | T       | CDS1            | silent                      | c.951           | p.F317            | tier1 | 41450              | 542                  | 540              | 1                | 0.002      | 5099                | 804                   | 499               | 303               | 0.378       | NA              | NA                | NA            | NA            | NA      | 5142            | 466               | 464           | 0             | 0.000   |                  |                    |                |                |          |

| UPN    | Chr | Start     | Stop      | Reference | Variant | Gene Symbol     | Mutation Type               | Coding Position | Amino Acid Change | Tier  | Normal Total Count | Normal Unique Count* | Normal Ref Count | Normal Var Count | Normal VAF | Initial Total Count | Initial Unique Count* | Initial Ref Count | Initial Var Count | Initial VAF | Pre Total Count | Pre Unique Count* | Pre Ref Count | Pre Var Count | Pre VAF | D30 Total Count | D30 Unique Count* | D30 Ref Count | D30 Var Count | D30 VAF | D100 Total Count | D100 Unique Count* | D100 Ref Count | D100 Var Count | D100 VAF |
|--------|-----|-----------|-----------|-----------|---------|-----------------|-----------------------------|-----------------|-------------------|-------|--------------------|----------------------|------------------|------------------|------------|---------------------|-----------------------|-------------------|-------------------|-------------|-----------------|-------------------|---------------|---------------|---------|-----------------|-------------------|---------------|---------------|---------|------------------|--------------------|----------------|----------------|----------|
| 395344 | 8   | 124383531 | 124383531 | C         | T       | ATAD2           | missense                    | c.584           | p.R195H           | tier1 | 14629              | 1830                 | 1818             | 11               | 0.006      | 14848               | 1841                  | 1287              | 550               | 0.299       | NA              | NA                | NA            | NA            | NA      | 20090           | 1662              | 1632          | 24            | 0.014   | 11134            | 1240               | 1225           | 10             | 0.008    |
| 395344 | 11  | 3041385   | 3041385   | C         | T       | CARS            | intronic                    | c.1266+65       | e11+65            | tier3 | 7112               | 1194                 | 1183             | 11               | 0.009      | 9548                | 1111                  | 665               | 436               | 0.396       | NA              | NA                | NA            | NA            | NA      | 10051           | 908               | 902           | 5             | 0.006   | 6338             | 725                | 720            | 4              | 0.006    |
| 395344 | 11  | 103043939 | 103043939 | C         | A       | DYNC2H1         | missense                    | c.5463          | p.D1821E          | tier1 | 30737              | 3704                 | 3676             | 23               | 0.006      | 27370               | 3236                  | 1869              | 1333              | 0.416       | NA              | NA                | NA            | NA            | NA      | 50846           | 4421              | 4370          | 50            | 0.011   | 25479            | 3026               | 3002           | 19             | 0.006    |
| 395344 | 12  | 42866304  | 42866304  | C         | T       | PRICKLE1        | missense                    | c.15            | p.M5I             | tier1 | 42612              | 5402                 | 5337             | 61               | 0.011      | 27001               | 3358                  | 2428              | 902               | 0.271       | NA              | NA                | NA            | NA            | NA      | 55646           | 4485              | 4462          | 17            | 0.004   | 29418            | 3245               | 3236           | 9              | 0.003    |
| 395344 | 13  | 95095724  | 95095724  | G         | A       | DC7             | silent                      | c.1446          | p.D482            | tier1 | 37506              | 5536                 | 5386             | 143              | 0.026      | 20964               | 3033                  | 1890              | 1115              | 0.371       | NA              | NA                | NA            | NA            | NA      | 27709           | 2945              | 2915          | 22            | 0.007   | 17198            | 2402               | 2383           | 14             | 0.006    |
| 395344 | 16  | 32914951  | 32914951  | C         | A       | IGHV3OR16-15    | 3_prime_untranslated_region | c.*32914951     | NULL              | tier3 | 16195              | 1983                 | 1979             | 0                | 0.000      | 11281               | 1319                  | 967               | 343               | 0.262       | NA              | NA                | NA            | NA            | NA      | 25985           | 2350              | 2340          | 6             | 0.003   | 12523            | 1498               | 1488           | 1              | 0.000    |
| 395344 | 19  | 36216047  | 36216047  | T         | C       | KMT2B           | intronic                    | c.3528+59       | e10+59            | tier3 | 27609              | 3427                 | 3388             | 36               | 0.011      | 18206               | 1968                  | 1122              | 817               | 0.421       | NA              | NA                | NA            | NA            | NA      | 21799           | 2020              | 2002          | 15            | 0.007   | 14284            | 1689               | 1669           | 16             | 0.009    |
| 395344 | 21  | 36252865  | 36252865  | C         | T       | RUNX1           | missense                    | c.497           | p.R166Q           | tier1 | 26896              | 3450                 | 3425             | 23               | 0.007      | 17808               | 2122                  | 1297              | 806               | 0.383       | NA              | NA                | NA            | NA            | NA      | 19449           | 2241              | 2214          | 23            | 0.010   | 14055            | 1978               | 1949           | 20             | 0.010    |
| 395344 | 21  | 44524456  | 44524456  | G         | A       | U2AF1           | missense                    | c.101           | p.S34F            | tier1 | 12143              | 1825                 | 1800             | 25               | 0.014      | 7376                | 961                   | 651               | 308               | 0.321       | NA              | NA                | NA            | NA            | NA      | 17805           | 2119              | 2109          | 10            | 0.005   | 9216             | 1398               | 1390           | 7              | 0.005    |
| 395344 | 22  | 19452777  | 19452777  | T         | A       | UFD1L           | missense                    | c.443           | p.N148I           | tier1 | 50171              | 6290                 | 6212             | 63               | 0.010      | 39442               | 5176                  | 3069              | 2030              | 0.398       | NA              | NA                | NA            | NA            | NA      | 58929           | 4568              | 4513          | 39            | 0.009   | 31360            | 3453               | 3388           | 29             | 0.008    |
| 429745 | 1   | 1078202   | 1078202   | G         | A       | LOC254099       | rna                         | NULL            | NULL              | tier1 | 5931               | 911                  | 907              | 4                | 0.004      | 4908                | 690                   | 421               | 263               | 0.385       | 2088            | 234               | 151           | 81            | 0.349   | 7726            | 722               | 622           | 93            | 0.130   | 13784            | 2100               | 1849           | 240            | 0.115    |
| 429745 | 1   | 78189035  | 78189035  | T         | C       | USP33           | missense                    | c.1463          | p.Q488R           | tier1 | 2431               | 445                  | 441              | 4                | 0.009      | 2906                | 416                   | 253               | 163               | 0.392       | 795             | 123               | 92            | 31            | 0.252   | 2851            | 277               | 248           | 29            | 0.105   | 5122             | 835                | 734            | 99             | 0.119    |
| 429745 | 1   | 103400670 | 103400670 | C         | T       | COL11A1         | splice_site                 | c.3475-1        | e45-1             | tier1 | 154                | 0                    | 0                | 0                | 0.000      | 334                 | 49                    | 43                | 6                 | 0.122       | 79              | 6                 | 4             | 2             | NA      | 345             | 0                 | 0             | NA            | 643     | 106              | 106                | 0              | 0.000          |          |
| 429745 | 1   | 193018974 | 193018974 | G         | T       | UCHL5           | missense                    | c.148           | p.H50N            | tier1 | 635                | 102                  | 102              | 0                | 0.000      | 697                 | 103                   | 52                | 51                | 0.495       | 265             | 24                | 17            | 7             | 0.292   | 758             | 55                | 48            | 7             | 0.127   | 1191             | 186                | 161            | 25             | 0.134    |
| 429745 | 1   | 197021696 | 197021696 | T         | A       | F13B            | intronic                    | c.1555+68       | e9+68             | tier3 | 2218               | 180                  | 180              | 0                | 0.000      | 1632                | 136                   | 76                | 60                | 0.441       | 1399            | 89                | 68            | 20            | 0.227   | 3010            | 151               | 137           | 13            | 0.087   | 4203             | 326                | 291            | 35             | 0.107    |
| 429745 | 1   | 240071866 | 240071866 | C         | T       | CHRM3           | missense                    | c.1115          | p.P372L           | tier1 | 18828              | 3031                 | 3005             | 21               | 0.007      | 12958               | 1506                  | 905               | 580               | 0.391       | 11480           | 1361              | 966           | 389           | 0.287   | 30654           | 3547              | 3130          | 382           | 0.109   | 48285            | 6995               | 6216           | 749            | 0.108    |
| 429745 | 2   | 234231616 | 234231616 | G         | A       | SAG             | missense                    | c.400           | p.V134M           | tier1 | 366                | 64                   | 63               | 1                | 0.016      | 775                 | 112                   | 74                | 38                | 0.309       | 253             | 32                | 18            | 14            | 0.438   | 914             | 71                | 68            | 3             | 0.042   | 1357             | 190                | 171            | 19             | 0.100    |
| 429745 | 3   | 38010850  | 38010850  | G         | T       | CTDSPL          | intronic                    | c.426+1477      | e5+1477           | tier3 | 18584              | 2730                 | 2701             | 28               | 0.010      | 14632               | 1646                  | 959               | 660               | 0.438       | 8380            | 807               | 522           | 282           | 0.351   | 23175           | 2227              | 1951          | 249           | 0.014   | 38870            | 5267               | 4584           | 644            | 0.123    |
| 429745 | 3   | 197807179 | 197807179 | C         | T       | ANKRD18BP       | splice_region               | c.NULL          | NULL              | tier2 | 5395               | 618                  | 617              | 0                | 0.000      | 2321                | 200                   | 143               | 54                | 0.274       | 2081            | 182               | 158           | 24            | 0.132   | 6352            | 550               | 520           | 27            | 0.049   | 12351            | 1431               | 1356           | 73             | 0.051    |
| 429745 | 5   | 126667153 | 126667153 | G         | A       | MEGF10          | intronic                    | c.116+37        | e1+37             | tier3 | 1043               | 100                  | 99               | 1                | 0.010      | 1329                | 126                   | 61                | 63                | 0.508       | 475             | 37                | 26            | 11            | 0.297   | 1280            | 82                | 67            | 15            | 0.083   | 2260             | 222                | 189            | 33             | 0.149    |
| 429745 | 5   | 134705108 | 134705108 | G         | C       | H2AFY           | silent                      | c.465           | p.A155            | tier1 | 5079               | 644                  | 639              | 5                | 0.008      | 5428                | 589                   | 360               | 226               | 0.386       | 2986            | 271               | 160           | 110           | 0.407   | 8240            | 703               | 598           | 99            | 0.142   | 12226            | 1587               | 1360           | 223            | 0.141    |
| 429745 | 5   | 139222426 | 139222426 | G         | A       | PSD2            | 3_prime_untranslated_region | c.*367          | NULL              | tier3 | 4475               | 724                  | 717              | 5                | 0.007      | 3764                | 458                   | 266               | 187               | 0.413       | 1861            | 187               | 122           | 64            | 0.344   | 5627            | 555               | 487           | 67            | 0.121   | 9745             | 1340               | 1177           | 155            | 0.116    |
| 429745 | 5   | 176008570 | 176008570 | C         | T       | CDHR2           | missense                    | c.2045          | p.T682I           | tier1 | 33969              | 4456                 | 4449             | 6                | 0.001      | 20616               | 2221                  | 1786              | 411               | 0.187       | 19249           | 2116              | 1955          | 152           | 0.072   | 48165           | 5253              | 5006          | 221           | 0.042   | 74751            | 9832               | 9357           | 447            | 0.046    |
| 429745 | 5   | 176709402 | 176709402 | A         | G       | NSD1            | intronic                    | c.5893-64       | e18-64            | tier3 | 91                 | 0                    | 0                | 0                | 0.000      | 262                 | 39                    | 25                | 13                | 0.342       | 44              | 4                 | 3             | 1             | NA      | 257             | 18                | 15            | 3             | 0.167   | 648              | 94                 | 89             | 5              | 0.053    |
| 429745 | 6   | 27278373  | 27278373  | T         | C       | POM121L2        | missense                    | c.1577          | p.D526G           | tier1 | 13531              | 2189                 | 2166             | 20               | 0.009      | 10136               | 1360                  | 783               | 565               | 0.419       | 5544            | 677               | 493           | 176           | 0.263   | 15079           | 1771              | 1562          | 191           | 0.109   | 28268            | 4382               | 3844           | 516            | 0.118    |
| 429745 | 7   | 53854870  | 53854870  | C         | T       | ENSG00000232418 | 3_prime_untranslated_region | c.*53854870     | NULL              | tier2 | 28223              | 3696                 | 3663             | 32               | 0.009      | 16551               | 1547                  | 869               | 669               | 0.435       | 21358           | 2326              | 1589          | 720           | 0.312   | 32748           | 3504              | 3109          | 367           | 0.106   | 53630            | 6754               | 5954           | 768            | 0.114    |
| 429745 | 10  | 11376350  | 11376350  | T         | G       | CELF2           | 3_prime_untranslated_region | c.*5334         | NULL              | tier3 | 7924               | 1006                 | 997              | 8                | 0.008      | 9395                | 951                   | 590               | 350               | 0.372       | 4952            | 443               | 266           | 174           | 0.395   | 11674           | 1004              | 875           | 124           | 0.124   | 22812            | 2631               | 2291           | 331            | 0.126    |
| 429745 | 10  | 35300792  | 35300792  | T         | C       | CUL2            | missense                    | c.12147         | p.N716S           | tier1 | 12515              | 1709                 | 1701             | 8                | 0.005      | 7221                | 506                   | 360               | 416               | 0.578       | 882             | 612               | 266           | 303           | 0.354   | 15443           | 1835              | 1662          | 164           | 0.090   | 22763            | 3133               | 2791           | 325            | 0.104    |
| 429745 | 11  | 62302518  | 62302518  | C         | T       | AHNAK           | nonsense                    | c.299           | p.W100*           | tier1 | 40270              | 5304                 | 5267             | 33               | 0.006      | 32662               | 3139                  | 1825              | 1256              | 0.408       | 27065           | 2795              | 1838          | 928           | 0.336   | 63305           | 6506              | 5702          | 719           | 0.112   | 103605           | 12896              | 11222          | 1538           | 0.121    |
| 429745 | 11  | 67020214  | 67020214  | G         | A       | KDM2A           | missense                    | c.2818          | p.A940T           | tier1 | 4708               | 612                  | 604              | 6                | 0.010      | 4879                | 579                   | 347               | 223               | 0.391       | 2010            | 203               | 123           | 78            | 0.388   | 5587            | 502               | 445           | 54            | 0.108   | 10662            | 1403               | 1212           | 181            | 0.130    |
| 429745 | 11  | 67565182  | 67565182  | C         | T       | FAM86C2P        | 5_prime_untranslated_region | c.-67565182     | NULL              | tier3 | 5336               | 901                  | 891              | 10               | 0.011      | 4344                | 544                   | 333               | 209               | 0.386       | 3552            | 451               | 355           | 95            | 0.211   | 11610           | 1395              | 1295          | 97            | 0.070   | 20829            | 3034               | 2825           | 201            | 0.066    |
| 429745 | 12  | 102074329 | 102074329 | G         | A       | MYBPC1          | intronic                    | c.3433+22       | e29+22            | tier3 | 8975               | 1137                 | 1127             | 10               | 0.009      | 5589                | 529                   | 322               | 204               | 0.388       | 6302            | 560               | 413           | 145           | 0.260   | 10666           | 939               | 834           | 102           | 0.109   | 17843            | 2176               | 1926           | 245            | 0.113    |
| 429745 | 12  | 109569189 | 109569189 | G         | T       | ACACB           | 5_prime_untranslated_region | c.-8097         | NULL              | tier3 | 30163              | 4131                 | 4094             | 36               | 0.009      | 17652               | 1755                  | 1153              | 585               | 0.337       | 20162           | 2093              | 1634          | 444           | 0.214   | 41852           | 4379              | 4009          | 331           | 0.076   | 65401            | 8618               | 7781           | 798            | 0.093    |
| 429745 | 14  | 31405745  | 31405745  | C         | A       | STRN3           | missense                    | c.802           | p.G268C           | tier1 | 5682               | 743                  | 736              | 7                | 0.009      | 3901                | 377                   | 200               | 176               | 0.468       | 3361            | 300               | 192           | 107           | 0.358   | 6926            | 594               | 518           | 72            | 0.122   | 11384            | 1425               | 1212           | 211            | 0.148    |
| 429745 | 14  | 64921502  |           |           |         |                 |                             |                 |                   |       |                    |                      |                  |                  |            |                     |                       |                   |                   |             |                 |                   |               |               |         |                 |                   |               |               |         |                  |                    |                |                |          |



| UPN    | Chr | Start     | Stop      | Reference | Variant | Gene Symbol | Mutation Type               | Coding Position | Amino Acid Change | Tier  | Normal Total Count | Normal Unique Count* | Normal Ref Count | Normal Var Count | Normal VAF | Initial Total Count | Initial Unique Count* | Initial Ref Count | Initial Var Count | Initial VAF | Pre Total Count | Pre Unique Count* | Pre Ref Count | Pre Var Count | Pre VAF | D30 Total Count | D30 Unique Count* | D30 Ref Count | D30 Var Count | D30 VAF | D100 Total Count | D100 Unique Count* | D100 Ref Count | D100 Var Count | D100 VAF |
|--------|-----|-----------|-----------|-----------|---------|-------------|-----------------------------|-----------------|-------------------|-------|--------------------|----------------------|------------------|------------------|------------|---------------------|-----------------------|-------------------|-------------------|-------------|-----------------|-------------------|---------------|---------------|---------|-----------------|-------------------|---------------|---------------|---------|------------------|--------------------|----------------|----------------|----------|
| 435866 | 7   | 151882645 | 151882645 | C         | A       | MLL3        | missense                    | c.5080          | p.V1694L          | tier1 | 18341              | 3179                 | 3137             | 41               | 0.013      | 8337                | 1660                  | 1049              | 606               | 0.366       | 19306           | 2029              | 1995          | 34            | 0.017   | 105404          | 6095              | 6092          | 0             | 0.000   | 100372           | 6151               | 6136           | 11             | 0.002    |
| 435866 | 8   | 68024182  | 68024182  | G         | A       | CSPPI1      | intronic                    | c.1226-25       | e12-25            | tier3 | 28617              | 2605                 | 2573             | 32               | 0.012      | 14377               | 1643                  | 1008              | 631               | 0.385       | 24083           | 1401              | 1369          | 31            | 0.022   | 163255          | 4606              | 4606          | 0             | 0.000   | 128108           | 3781               | 3773           | 8              | 0.002    |
| 435866 | 8   | 139727925 | 139727925 | C         | A       | COL22A1     | missense                    | c.2517          | p.K839N           | tier1 | 14770              | 1481                 | 1456             | 25               | 0.017      | 6594                | 812                   | 465               | 344               | 0.425       | 13358           | 871               | 843           | 28            | 0.032   | 74830           | 2249              | 2249          | 0             | 0.000   | 47347            | 2114               | 2110           | 4              | 0.002    |
| 435866 | 10  | 81921715  | 81921715  | G         | T       | ANXA11      | silent                      | c.1156          | p.R386            | tier1 | 28956              | 2256                 | 2244             | 12               | 0.005      | 27498               | 2104                  | 1088              | 1007              | 0.481       | 32356           | 1496              | 1486          | 10            | 0.007   | 230558          | 5119              | 5117          | 1             | 0.000   | 262348           | 5468               | 5448           | 18             | 0.003    |
| 435866 | 10  | 120810716 | 120810716 | A         | G       | EIF3A       | missense                    | c.2314          | p.Y772H           | tier1 | 15834              | 2265                 | 2253             | 10               | 0.004      | 8732                | 1502                  | 893               | 604               | 0.403       | 16716           | 1341              | 1328          | 13            | 0.010   | 89665           | 3829              | 3829          | 0             | 0.000   | 82069            | 3736               | 3729           | 6              | 0.002    |
| 435866 | 15  | 28420657  | 28420657  | C         | T       | HERC2       | splice_site                 | c.9831+1        | e63+1             | tier1 | 9040               | 828                  | 812              | 16               | 0.019      | 5494                | 551                   | 305               | 245               | 0.445       | 8678            | 438               | 423           | 15            | 0.034   | 32185           | 1144              | 1144          | 0             | 0.000   | 52632            | 1429               | 1425           | 4              | 0.003    |
| 435866 | 16  | 3341019   | 3341019   | C         | T       | ZNF263      | 3_prime_untranslated_region | c.*461          | NULL              | tier2 | 41409              | 2681                 | 2649             | 32               | 0.012      | 27111               | 1794                  | 1274              | 516               | 0.288       | 37079           | 1501              | 1476          | 25            | 0.017   | 310483          | 6336              | 6332          | 4             | 0.000   | 258758           | 5137               | 5126           | 10             | 0.002    |
| 435866 | 16  | 87870242  | 87870242  | C         | T       | SLC7A5      | silent                      | c.1152          | p.T384            | tier1 | 51148              | 3783                 | 3763             | 17               | 0.004      | 34652               | 3116                  | 1778              | 1330              | 0.428       | 44181           | 1996              | 1972          | 22            | 0.011   | 277199          | 6340              | 6339          | 1             | 0.000   | 345963           | 7896               | 7869           | 24             | 0.003    |
| 435866 | 17  | 40049260  | 40049260  | A         | G       | ACLY        | intronic                    | c.1763+26       | e15+26            | tier2 | 19218              | 1932                 | 1908             | 23               | 0.012      | 12423               | 1333                  | 925               | 404               | 0.304       | 19972           | 1270              | 1245          | 23            | 0.018   | 129367          | 3722              | 3722          | 0             | 0.000   | 150179           | 3843               | 3842           | 1              | 0.000    |
| 435866 | 17  | 74732959  | 74732959  | G         | T       | SRSF2       | missense                    | c.284           | p.P95H            | tier1 | 17829              | 1296                 | 1268             | 26               | 0.020      | 18244               | 1580                  | 873               | 702               | 0.446       | 23322           | 1205              | 1184          | 21            | 0.017   | 114677          | 3195              | 3193          | 2             | 0.000   | 168820           | 4035               | 4026           | 9              | 0.002    |
| 435866 | 18  | 61226995  | 61226995  | C         | G       | SERPINF12   | intronic                    | c.384+44        | e3+44             | tier2 | 18158              | 2791                 | 2763             | 27               | 0.010      | 8346                | 1647                  | 998               | 647               | 0.393       | 17288           | 1453              | 1426          | 27            | 0.019   | 76142           | 3486              | 3485          | 1             | 0.000   | 88700            | 4323               | 4312           | 9              | 0.002    |
| 435866 | 20  | 14830634  | 14830634  | A         | G       | MACROD2     | 3_prime_untranslated_region | c.*14830634     | NULL              | tier3 | 4060               | 789                  | 786              | 3                | 0.004      | 1600                | 356                   | 194               | 160               | 0.452       | 3377            | 364               | 362           | 2             | 0.000   | 16068           | 924               | 922           | 0             | 0.000   | 12242            | 801                | 799            | 2              | 0.000    |
| 435866 | 22  | 38884063  | 38884063  | T         | C       | DDX17       | missense                    | c.1505          | p.Y502C           | tier1 | 47465              | 4127                 | 4050             | 74               | 0.018      | 31334               | 2786                  | 1724              | 1053              | 0.379       | 48316           | 2487              | 2423          | 64            | 0.026   | 330616          | 8032              | 8031          | 0             | 0.000   | 314458           | 7601               | 7588           | 13             | 0.002    |
| 435866 | G   | 79971691  | 79971691  | C         | G       | BRWD3       | missense                    | c.2290          | p.E764Q           | tier1 | 15971              | 1677                 | 1649             | 28               | 0.017      | 7953                | 825                   | 474               | 347               | 0.423       | 11898           | 765               | 748           | 17            | 0.022   | 48921           | 1557              | 1556          | 1             | 0.000   | 33426            | 1092               | 1087           | 4              | 0.004    |
| 435866 | X   | 105450024 | 105450024 | C         | T       | MUM1L1      | missense                    | c.599           | p.S200L           | tier1 | 20377              | 2063                 | 2022             | 41               | 0.020      | 9473                | 1402                  | 770               | 625               | 0.448       | 16794           | 1075              | 1037          | 38            | 0.035   | 57612           | 1879              | 1879          | 0             | 0.000   | 47350            | 1819               | 1809           | 10             | 0.005    |
| 437422 | 1   | 22186507  | 22186507  | G         | T       | HSPG2       | intronic                    | c.5015-12       | e41-12            | tier3 | 6210               | 757                  | 751              | 6                | 0.008      | 18971               | 2526                  | 1695              | 806               | 0.322       | 7469            | 1114              | 676           | 435           | 0.392   | 20271           | 2076              | 2075          | 0             | 0.000   | NA               | NA                 | NA             | NA             | NA       |
| 437422 | 1   | 27736195  | 27736195  | T         | C       | WASF2       | missense                    | c.1330          | p.I444V           | tier1 | 39553              | 5203                 | 5176             | 24               | 0.005      | 45505               | 6561                  | 4508              | 1091              | 0.195       | 22789           | 3091              | 2535          | 547           | 0.177   | 38378           | 4209              | 4208          | 0             | 0.000   | NA               | NA                 | NA             | NA             | NA       |
| 437422 | 1   | 167802237 | 167802237 | C         | A       | ADCY10      | missense                    | p.S1194L        | tier1             | 48246 | 6354               | 6310                 | 38               | 0.006            | 54754      | 6118                | 4536                  | 1892              | 0.294             | 36721       | 4905            | 3194              | 1683          | 0.345         | 53584   | 5840            | 5839              | 0             | 0.000         | NA      | NA               | NA                 | NA             | NA             |          |
| 437422 | 1   | 190067860 | 190067860 | C         | T       | BRINP3      | missense                    | c.1589          | p.R530H           | tier1 | 5912               | 779                  | 772              | 7                | 0.009      | 10489               | 1421                  | 937               | 476               | 0.337       | 3869            | 611               | 378           | 232           | 0.380   | 6350            | 563               | 563           | 0             | 0.000   | NA               | NA                 | NA             | NA             | NA       |
| 437422 | 1   | 208061976 | 208061976 | C         | T       | CD3A        | intronic                    | c.972+51        | e7+51             | tier3 | 18308              | 2319                 | 2298             | 17               | 0.007      | 27880               | 3295                  | 2198              | 1014              | 0.316       | 13762           | 1929              | 1131          | 744           | 0.397   | 14095           | 1205              | 1205          | 0             | 0.000   | NA               | NA                 | NA             | NA             | NA       |
| 437422 | 2   | 75105821  | 75105821  | G         | A       | HK2         | silent                      | c.1038          | p.K346            | tier1 | 44629              | 5762                 | 5722             | 36               | 0.006      | 50097               | 6406                  | 4761              | 1563              | 0.247       | 24618           | 3335              | 2544          | 777           | 0.234   | 48945           | 5265              | 5265          | 0             | 0.000   | NA               | NA                 | NA             | NA             | NA       |
| 437422 | 3   | 167006710 | 167006710 | C         | G       | ZBBX        | missense                    | c.1941          | p.L647F           | tier1 | 9013               | 1149                 | 1145             | 3                | 0.003      | 17092               | 2055                  | 1482              | 553               | 0.272       | 6258            | 844               | 515           | 327           | 0.388   | 10012           | 996               | 996           | 0             | 0.000   | NA               | NA                 | NA             | NA             | NA       |
| 437422 | 4   | 166416855 | 166416855 | C         | T       | CPE         | intronic                    | c.1332+26       | e8+26             | tier3 | 6557               | 608                  | 599              | 6                | 0.010      | 8555                | 928                   | 684               | 240               | 0.260       | 2666            | 365               | 298           | 65            | 0.179   | 5769            | 485               | 484           | 0             | 0.000   | NA               | NA                 | NA             | NA             | NA       |
| 437422 | 5   | 133898014 | 133898014 | G         | A       | PHF15       | missense                    | c.809           | p.G270E           | tier1 | 50979              | 6709                 | 6650             | 53               | 0.008      | 73568               | 8933                  | 6541              | 2249              | 0.256       | 35058           | 4418              | 2614          | 1778          | 0.405   | 66875           | 7560              | 7556          | 0             | 0.000   | NA               | NA                 | NA             | NA             | NA       |
| 437422 | 7   | 6193554   | 6193554   | C         | T       | USP42       | missense                    | c.2369          | p.A790V           | tier1 | 3404               | 344                  | 341              | 3                | 0.009      | 11954               | 1499                  | 952               | 538               | 0.361       | 2454            | 303               | 149           | 154           | 0.508   | 13019           | 1462              | 1462          | 0             | 0.000   | NA               | NA                 | NA             | NA             | NA       |
| 437422 | 7   | 77885784  | 77885784  | C         | T       | MAGI2       | missense                    | c.1523          | p.R508H           | tier1 | 30588              | 3946                 | 3942             | 2                | 0.001      | 34134               | 4080                  | 3868              | 189               | 0.047       | 17554           | 2389              | 2364          | 19            | 0.008   | 30241           | 3233              | 3231          | 1             | 0.000   | NA               | NA                 | NA             | NA             | NA       |
| 437422 | 7   | 120428042 | 120428042 | C         | T       | TSPAN12     | 3_prime_untranslated_region | c.*604          | NULL              | tier2 | 1472               | 133                  | 132              | 1                | 0.008      | 1502                | 165                   | 97                | 66                | 0.405       | 1501            | 200               | 78            | 122           | 0.610   | 1946            | 142               | 142           | 0             | 0.000   | NA               | NA                 | NA             | NA             | NA       |
| 437422 | 8   | 113299258 | 113299258 | T         | C       | CSMD3       | intronic                    | c.9331+35       | e58+35            | tier3 | 17383              | 1991                 | 1982             | 7                | 0.004      | 18396               | 2131                  | 1693              | 419               | 0.198       | 9338            | 1227              | 981           | 237           | 0.195   | 14994           | 1457              | 1457          | 0             | 0.000   | NA               | NA                 | NA             | NA             | NA       |
| 437422 | 11  | 46686904  | 46686904  | T         | G       | ATG13       | intronic                    | c.901-29        | e11-29            | tier3 | 14943              | 2657                 | 2636             | 20               | 0.008      | 23533               | 3805                  | 2787              | 978               | 0.260       | 6979            | 1265              | 771           | 489           | 0.388   | 13833           | 1866              | 1863          | 0             | 0.000   | NA               | NA                 | NA             | NA             | NA       |
| 437422 | 11  | 130067769 | 130067769 | G         | A       | ST14        | missense                    | p.R463Q         | tier1             | 42157 | 5856               | 5813                 | 38               | 0.006            | 65488      | 8559                | 5739                  | 2666              | 0.317             | 23607       | 3278            | 2152              | 1116          | 0.341         | 54687   | 6245            | 6239              | 1             | 0.000         | NA      | NA               | NA                 | NA             | NA             |          |
| 437422 | 12  | 122091150 | 122091150 | T         | G       | MORN3       | missense                    | c.479           | p.Y160S           | tier1 | 16248              | 1872                 | 1852             | 17               | 0.009      | 24384               | 2836                  | 2111              | 692               | 0.247       | 8373            | 1173              | 890           | 279           | 0.239   | 22977           | 2190              | 2189          | 0             | 0.000   | NA               | NA                 | NA             | NA             | NA       |
| 437422 | 16  | 10721483  | 10721483  | C         | T       | TEKTS       | missense                    | c.1415          | p.R472H           | tier1 | 55554              | 7362                 | 7296             | 62               | 0.008      | 70491               | 8711                  | 5995              | 2588              | 0.302       | 39020           | 4875              | 3188          | 1662          | 0.343   | 73592           | 8724              | 8714          | 3             | 0.000   | NA               | NA                 | NA             | NA             | NA       |
| 437422 | 17  | 7576851   | 7576851   | A         | C       | TP53        | splice_site                 | c.993+2         | e8+2              | tier1 | 44688              | 5679                 | 5636             | 42               | 0.007      | 52860               | 6575                  | 4754              | 1704              | 0.264       | 31257           | 4164              | 2524          | 1613          | 0.390   | 47704           | 5128              | 5127          | 0             | 0.000   | NA               | NA                 | NA             | NA             | NA       |
| 437422 | 17  | 7578431   | 7578431   | G         | A       | TP53        | nonsense                    | c.499           | p.Q167*           | tier1 | 52545              | 6923                 | 6900             | 20               | 0.003      | 78898               | 9845                  | 7659              | 2086              | 0.214       | 28499           | 3380              | 2758          | 613           | 0.182   | 80392           | 9700              | 9697          | 2             | 0.000   | NA               | NA                 | NA             | NA             | NA       |

| UPN    | Chr | Start     | Stop      | Reference | Variant | Gene Symbol     | Mutation Type               | Coding Position | Amino Acid Change | Tier  | Normal Total Count | Normal Unique Count* | Normal Ref Count | Normal Var Count | Normal VAF | Initial Total Count | Initial Unique Count* | Initial Ref Count | Initial Var Count | Initial VAF | Pre Total Count | Pre Unique Count* | Pre Ref Count | Pre Var Count | Pre VAF | D30 Total Count | D30 Unique Count* | D30 Ref Count | D30 Var Count | D30 VAF | D100 Total Count | D100 Unique Count* | D100 Ref Count | D100 Var Count | D100 VAF |
|--------|-----|-----------|-----------|-----------|---------|-----------------|-----------------------------|-----------------|-------------------|-------|--------------------|----------------------|------------------|------------------|------------|---------------------|-----------------------|-------------------|-------------------|-------------|-----------------|-------------------|---------------|---------------|---------|-----------------|-------------------|---------------|---------------|---------|------------------|--------------------|----------------|----------------|----------|
| 439820 | 12  | 112888165 | 112888165 | G         | C       | PTPN11          | missense                    | c.181           | p.D61H            | tier1 | 17019              | 2381                 | 2381             | 0                | 0.000      | 27691               | 3692                  | 3552              | 127               | 0.035       | NA              | NA                | NA            | NA            | NA      | 8182            | 600               | 599           | 1             | 0.000   | NA               | NA                 | NA             | NA             | NA       |
| 439820 | 14  | 24518609  | 24518609  | A         | G       | DHRS4L1         | intronic                    | c.NULL          | NULL              | tier3 | 11208              | 1382                 | 1346             | 35               | 0.025      | 8552                | 1062                  | 569               | 488               | 0.462       | NA              | NA                | NA            | NA            | NA      | 8219            | 520               | 285           | 229           | 0.446   | NA               | NA                 | NA             | NA             | NA       |
| 439820 | 14  | 24524337  | 24524337  | G         | T       | LRRCL16B        | missense                    | c.523           | p.V175F           | tier1 | 42204              | 5515                 | 5451             | 59               | 0.011      | 64239               | 8489                  | 5435              | 2861              | 0.345       | NA              | NA                | NA            | NA            | NA      | 27810           | 2145              | 1365          | 730           | 0.348   | NA               | NA                 | NA             | NA             | NA       |
| 439820 | 14  | 100792064 | 100792064 | A         | G       | SLC25A47        | intronic                    | c.29-61         | e2-61             | tier3 | 33480              | 4481                 | 4466             | 13               | 0.003      | 48595               | 6186                  | 3338              | 2733              | 0.450       | NA              | NA                | NA            | NA            | NA      | 33562           | 2482              | 1356          | 1052          | 0.437   | NA               | NA                 | NA             | NA             | NA       |
| 439820 | 15  | 91438809  | 91438809  | G         | C       | FES             | 3_prime_untranslated_region | c.*21           | NULL              | tier3 | 65267              | 8280                 | 8038             | 226              | 0.027      | 71347               | 8751                  | 4374              | 4236              | 0.492       | NA              | NA                | NA            | NA            | NA      | 71441           | 5563              | 2723          | 2601          | 0.489   | NA               | NA                 | NA             | NA             | NA       |
| 439820 | 16  | 2098338   | 2098338   | A         | G       | TSC2            | intronic                    | c.1-250         | e1-250            | tier2 | 18307              | 2518                 | 2446             | 70               | 0.028      | 21592               | 2809                  | 1461              | 1303              | 0.471       | NA              | NA                | NA            | NA            | NA      | 22564           | 1514              | 841           | 630           | 0.428   | NA               | NA                 | NA             | NA             | NA       |
| 439820 | 16  | 7761443   | 7761443   | G         | A       | RBFOX1          | 3_prime_untranslated_region | c.*1800         | NULL              | tier3 | 2496               | 298                  | 298              | 0                | 0.000      | 2507                | 381                   | 315               | 64                | 0.169       | NA              | NA                | NA            | NA            | NA      | 1075            | 65                | 61            | 4             | 0.062   | NA               | NA                 | NA             | NA             | NA       |
| 439820 | 16  | 24582766  | 24582766  | G         | A       | RBBP6           | missense                    | c.4379          | p.R1460H          | tier1 | 17959              | 2428                 | 2420             | 7                | 0.003      | 17409               | 2195                  | 1405              | 773               | 0.355       | NA              | NA                | NA            | NA            | NA      | 12458           | 864               | 832           | 31            | 0.036   | NA               | NA                 | NA             | NA             | NA       |
| 439820 | 16  | 29576812  | 29576812  | T         | C       | ENSG00000205534 | 5_prime_untranslated_region | c.-29576812     | NULL              | tier3 | 1391               | 306                  | 304              | 1                | 0.003      | 467                 | 90                    | 70                | 20                | 0.222       | NA              | NA                | NA            | NA            | NA      | 872             | 87                | 69            | 18            | 0.207   | NA               | NA                 | NA             | NA             | NA       |
| 439820 | 16  | 50835415  | 50835415  | A         | G       | CYLD            | 3_prime_untranslated_region | c.*4996         | NULL              | tier3 | 4653               | 771                  | 766              | 5                | 0.006      | 4221                | 757                   | 475               | 281               | 0.272       | NA              | NA                | NA            | NA            | NA      | 1830            | 149               | 51            | 98            | 0.658   | NA               | NA                 | NA             | NA             | NA       |
| 439820 | 16  | 50835731  | 50835731  | C         | G       | CYLD            | 3_prime_untranslated_region | c.*5312         | NULL              | tier3 | 8889               | 1109                 | 1102             | 7                | 0.006      | 7198                | 877                   | 494               | 379               | 0.434       | NA              | NA                | NA            | NA            | NA      | 4248            | 288               | 275           | 13            | 0.045   | NA               | NA                 | NA             | NA             | NA       |
| 439820 | 17  | 7577538   | 7577538   | C         | T       | TP53            | missense                    | c.743           | p.R248Q           | tier1 | 52868              | 6841                 | 6796             | 41               | 0.006      | 48827               | 6763                  | 3251              | 3434              | 0.514       | NA              | NA                | NA            | NA            | NA      | 54609           | 5015              | 583           | 4355          | 0.882   | NA               | NA                 | NA             | NA             | NA       |
| 439820 | 17  | 15942836  | 15942836  | G         | C       | NCOR1           | missense                    | c.6866          | p.P2289R          | tier1 | 10804              | 1457                 | 1450             | 7                | 0.005      | 27645               | 3562                  | 1980              | 1546              | 0.438       | NA              | NA                | NA            | NA            | NA      | 15923           | 1078              | 1056          | 22            | 0.020   | NA               | NA                 | NA             | NA             | NA       |
| 439820 | 18  | 7034550   | 7034550   | A         | G       | LAMA1           | missense                    | c.1979          | p.M660T           | tier1 | 23162              | 3026                 | 3013             | 12               | 0.004      | 25313               | 3185                  | 1683              | 1473              | 0.467       | NA              | NA                | NA            | NA            | NA      | 16596           | 1119              | 611           | 492           | 0.446   | NA               | NA                 | NA             | NA             | NA       |
| 439820 | 18  | 14752893  | 14752893  | A         | T       | ANKRD30B        | missense                    | c.392           | p.D131V           | tier1 | 20437              | 2533                 | 2516             | 15               | 0.006      | 23599               | 2708                  | 1563              | 1114              | 0.416       | NA              | NA                | NA            | NA            | NA      | 14513           | 973               | 552           | 408           | 0.425   | NA               | NA                 | NA             | NA             | NA       |
| 439820 | 18  | 29046556  | 29046556  | G         | C       | DSG3            | missense                    | c.1475          | p.C492S           | tier1 | 10536              | 1356                 | 1354             | 1                | 0.001      | 10670               | 1545                  | 1355              | 181               | 0.118       | NA              | NA                | NA            | NA            | NA      | 7036            | 455               | 455           | 0             | 0.000   | NA               | NA                 | NA             | NA             | NA       |
| 439820 | 18  | 34205430  | 34205430  | G         | A       | FHOD3           | intronic                    | c.958-44        | e10-44            | tier3 | 41360              | 5457                 | 5440             | 14               | 0.003      | 72467               | 9398                  | 5602              | 3588              | 0.390       | NA              | NA                | NA            | NA            | NA      | 37662           | 2681              | 2623          | 54            | 0.020   | NA               | NA                 | NA             | NA             | NA       |
| 439820 | 18  | 42531907  | 42531907  | G         | A       | SETBP1          | missense                    | c.2602          | p.D868N           | tier1 | 51353              | 6527                 | 6524             | 2                | 0.000      | 57353               | 7166                  | 5804              | 1291              | 0.182       | NA              | NA                | NA            | NA            | NA      | 43185           | 3202              | 3197          | 2             | 0.000   | NA               | NA                 | NA             | NA             | NA       |
| 439820 | 19  | 1529504   | 1529504   | G         | T       | PLK5            | intronic                    | c.490+15        | e5+15             | tier3 | 31908              | 4066                 | 4053             | 8                | 0.002      | 6117                | 8129                  | 6082              | 1914              | 0.239       | NA              | NA                | NA            | NA            | NA      | 48578           | 3616              | 2823          | 674           | 0.193   | NA               | NA                 | NA             | NA             | NA       |
| 439820 | 19  | 9007457   | 9007457   | C         | G       | MUC16           | intronic                    | c.39481+30      | e43+30            | tier3 | 10321              | 1911                 | 1909             | 0                | 0.000      | 17429               | 2955                  | 2833              | 114               | 0.039       | NA              | NA                | NA            | NA            | NA      | 11975           | 901               | 897           | 2             | 0.000   | NA               | NA                 | NA             | NA             | NA       |
| 439820 | 20  | 61291782  | 61291782  | G         | C       | SLCO4A1         | missense                    | c.906           | p.E302D           | tier1 | 28170              | 0                    | 0                | 0                | 0.000      | 35961               | 4117                  | 3851              | 241               | 0.059       | NA              | NA                | NA            | NA            | NA      | 34128           | 2211              | 2203          | 4             | 0.002   | NA               | NA                 | NA             | NA             | NA       |
| 439820 | 21  | 44514777  | 44514777  | T         | G       | U2AF1           | missense                    | c.470           | p.Q157P           | tier1 | 82663              | 9996                 | 9964             | 29               | 0.003      | 72468               | 8904                  | 4774              | 3977              | 0.454       | NA              | NA                | NA            | NA            | NA      | 71838           | 5386              | 2886          | 2289          | 0.442   | NA               | NA                 | NA             | NA             | NA       |
| 439820 | X   | 31462671  | 31462671  | G         | A       | DMD             | missense                    | c.9011          | p.T3004I          | tier1 | 1252               | 252                  | 250              | 2                | 0.008      | 1950                | 343                   | 305               | 308               | 0.898       | NA              | NA                | NA            | NA            | NA      | 1066            | 82                | 11            | 71            | 0.866   | NA               | NA                 | NA             | NA             | NA       |
| 439820 | X   | 110439784 | 110439784 | G         | C       | PAK3            | silent                      | c.1431          | p.P477            | tier1 | 15220              | 1855                 | 1852             | 1                | 0.001      | 18680               | 2359                  | 2083              | 270               | 0.115       | NA              | NA                | NA            | NA            | NA      | 10952           | 717               | 715           | 1             | 0.000   | NA               | NA                 | NA             | NA             | NA       |
| 439820 | X   | 128781951 | 128781951 | C         | G       | APLN            | intronic                    | c.128-57        | e2-57             | tier3 | 15355              | 1915                 | 1910             | 1                | 0.001      | 27274               | 3302                  | 2875              | 403               | 0.123       | NA              | NA                | NA            | NA            | NA      | 19751           | 1355              | 1354          | 1             | 0.000   | NA               | NA                 | NA             | NA             | NA       |
| 476807 | 1   | 26671642  | 26671642  | C         | A       | AIM1L           | intronic                    | c.169+204       | e2+204            | tier3 | 26825              | 3130                 | 3079             | 47               | 0.015      | 18889               | 2234                  | 1466              | 735               | 0.334       | 10329           | 930               | 926           | 0             | 0.000   | 19161           | 1789              | 1786          | 0             | 0.000   | NA               | NA                 | NA             | NA             | NA       |
| 476807 | 1   | 176525591 | 176525591 | T         | C       | PAPPA2          | silent                      | c.133           | p.L45             | tier1 | 27459              | 4743                 | 4734             | 6                | 0.001      | 33177               | 5047                  | 4199              | 797               | 0.160       | 23438           | 2273              | 2272          | 1             | 0.000   | 38444           | 5788              | 5765          | 0             | 0.000   | NA               | NA                 | NA             | NA             | NA       |
| 476807 | 2   | 177065811 | 177065811 | C         | T       | ENSG00000218175 | 5_prime_untranslated_region | c.-177065811    | NULL              | tier2 | 12225              | 2393                 | 2352             | 36               | 0.015      | 13526               | 2481                  | 1643              | 821               | 0.333       | 8020            | 1176              | 1175          | 1             | 0.000   | 22146           | 3628              | 3620          | 0             | 0.000   | NA               | NA                 | NA             | NA             | NA       |
| 476807 | 2   | 231906196 | 231906196 | G         | T       | Corf72          | intronic                    | c.748+72        | e2+72             | tier3 | 43393              | 6048                 | 5956             | 89               | 0.015      | 39518               | 5641                  | 3617              | 1951              | 0.350       | 25848           | 2421              | 2167          | 251           | 0.104   | 41531           | 5734              | 5722          | 0             | 0.000   | NA               | NA                 | NA             | NA             | NA       |
| 476807 | 3   | 41290971  | 41290971  | C         | T       | ULK4            | splice_region               | c.3764+9        | e35+9             | tier3 | 12559              | 1618                 | 1563             | 53               | 0.033      | 15126               | 2777                  | 1729              | 1016              | 0.370       | 6906            | 1192              | 712           | 426           | 0.401   | 14701           | 2140              | 2130          | 0             | 0.000   | NA               | NA                 | NA             | NA             | NA       |
| 476807 | 4   | 15937803  | 15937803  | G         | A       | FGFBP1          | silent                      | c.453           | p.V151            | tier1 | 20767              | 2413                 | 2405             | 7                | 0.003      | 25432               | 4080                  | 3441              | 598               | 0.148       | 22016           | 2491              | 2489          | 1             | 0.000   | 30540           | 4620              | 4601          | 0             | 0.000   | NA               | NA                 | NA             | NA             | NA       |
| 476807 | 4   | 66388703  | 66388703  | G         | A       | EPH5            | intronic                    | c.911-27442     | e4-27442          | tier3 | 24146              | 2659                 | 2619             | 38               | 0.014      | 18130               | 2190                  | 1474              | 707               | 0.324       | 13564           | 1493              | 1492          | 1             | 0.000   | 22748           | 2567              | 2565          | 0             | 0.000   | NA               | NA                 | NA             | NA             | NA       |
| 476807 | 4   | 126389815 | 126389815 | C         | G       | FAT4            | missense                    | c.12048         | p.D4016E          | tier1 | 25267              | 2770                 | 2721             | 45               | 0.016      | 16861               | 2011                  | 1288              | 713               | 0.356       | 20450           | 2061              | 2056          | 3             | 0.001   | 23099           | 2502              | 2498          | 0             | 0.000   | NA               | NA                 | NA             | NA             | NA       |
| 476807 | 4   | 183601392 | 183601392 | T         | C       | TENM3           | splice_region               | c.1538-9        | e8-9              | tier3 | 33948              | 3900                 | 3791             | 104              | 0.027      | 33966               | 4245                  | 2462              | 1729              | 0.413       | 27668           | 2943              | 1787          | 1154          | 0.392   | 36682           | 4303              | 4291          | 0             | 0.000   | 2                | 0                  | 0              | 0              | 0        |
| 476807 | 5   | 137589102 | 137589102 | G         | A       | GFR3            | intronic                    | c.1025-38       | e7-38             | tier3 | 20660              | 2558                 | 2533             | 22               | 0.009      | 36371               | 5100                  | 3300              | 1706              | 0.339       | 27372           | 2641              | 2634          | 3             | 0.000   | 37247           | 4754              | 4744          | 0             | 0.000   | NA               | NA                 | NA             | NA             | NA       |
| 476807 | 6   | 32007827  | 32007827  | C         | A       | CYP21A2         | missense                    | c.784           | p.L262I           | tier1 | 56872              | 7169                 | 7050             | 100              | 0.014      | 57645               | 7513                  | 4682              | 2714              | 0.367       |                 |                   |               |               |         |                 |                   |               |               |         |                  |                    |                |                |          |

| UPN    | Chr | Start     | Stop      | Reference | Variant | Gene Symbol | Mutation Type               | Coding Position | Amino Acid Change | Tier  | Normal Total Count | Normal Unique Count* | Normal Ref Count | Normal Var Count | Normal VAF | Initial Total Count | Initial Unique Count* | Initial Ref Count | Initial Var Count | Initial VAF | Pre Total Count | Pre Unique Count* | Pre Ref Count | Pre Var Count | Pre VAF | D30 Total Count | D30 Unique Count* | D30 Ref Count | D30 Var Count | D30 VAF | D100 Total Count | D100 Unique Count* | D100 Ref Count | D100 Var Count | D100 VAF |
|--------|-----|-----------|-----------|-----------|---------|-------------|-----------------------------|-----------------|-------------------|-------|--------------------|----------------------|------------------|------------------|------------|---------------------|-----------------------|-------------------|-------------------|-------------|-----------------|-------------------|---------------|---------------|---------|-----------------|-------------------|---------------|---------------|---------|------------------|--------------------|----------------|----------------|----------|
| 481668 | 1   | 46724289  | 46724289  | A         | G       | RAD54L      | intronic                    | c.211-69        | e4-69             | tier3 | 3728               | 352                  | 348              | 3                | 0.009      | 4127                | 467                   | 333               | 129               | 0.279       | 4663            | 442               | 341           | 100           | 0.227   | 6618            | 663               | 660           | 0             | 0.000   | 7398             | 958                | 953            | 0              | 0.000    |
| 481668 | 1   | 46724300  | 46724300  | A         | C       | RAD54L      | intronic                    | c.211-58        | e4-58             | tier3 | 3721               | 348                  | 345              | 3                | 0.009      | 3860                | 409                   | 290               | 114               | 0.282       | 4346            | 408               | 317           | 91            | 0.223   | 6286            | 634               | 629           | 0             | 0.000   | 6955             | 874                | 871            | 0              | 0.000    |
| 481668 | 1   | 152382172 | 152382172 | G         | T       | CRNN        | silent                      | p.T462          | tier1             | 3656  | 699                | 673                  | 26               | 0.037            | 4598       | 845                 | 495                   | 347               | 0.412             | 3837        | 682             | 429               | 251           | 0.369         | 7407    | 1549            | 1542              | 0             | 0.000         | 6010    | 1393             | 1393               | 0              | 0.000          |          |
| 481668 | 1   | 182827980 | 182827980 | A         | G       | DHX9        | missense                    | c.1013          | p.N338S           | tier1 | 13613              | 1470                 | 1424             | 38               | 0.026      | 11084               | 1197                  | 635               | 554               | 0.466       | 12071           | 1209              | 753           | 441           | 0.369   | 24757           | 3098              | 3090          | 0             | 0.000   | 21291            | 2749               | 2744           | 0              | 0.000    |
| 481668 | 1   | 247094587 | 247094587 | T         | C       | AHCTF1      | 5_prime_untranslated_region | c.-59           | NULL              | tier2 | 8842               | 960                  | 946              | 10               | 0.010      | 9923                | 1202                  | 946               | 250               | 0.209       | 11692           | 1277              | 1010          | 252           | 0.200   | 11538           | 1532              | 1526          | 0             | 0.000   | 16834            | 2591               | 2576           | 0              | 0.000    |
| 481668 | 2   | 1457512   | 1457512   | C         | G       | TPO         | missense                    | c.529           | p.L177V           | tier1 | 5765               | 702                  | 697              | 4                | 0.006      | 6019                | 713                   | 552               | 157               | 0.221       | 6186            | 692               | 562           | 128           | 0.186   | 9818            | 1206              | 1204          | 0             | 0.000   | 12114            | 2003               | 2003           | 0              | 0.000    |
| 481668 | 2   | 98853198  | 98853198  | A         | G       | VWA3B       | rna                         | NULL            | NULL              | tier1 | 5984               | 1092                 | 1074             | 16               | 0.015      | 6090                | 1039                  | 745               | 290               | 0.280       | 5740            | 941               | 734           | 207           | 0.220   | 9855            | 1695              | 1694          | 0             | 0.000   | 10850            | 0                  | 0              | 0              | NA       |
| 481668 | 4   | 95223388  | 95223388  | A         | G       | HPGDS       | missense                    | c.344           | p.M115T           | tier1 | 12213              | 1137                 | 1122             | 15               | 0.013      | 11031               | 1005                  | 745               | 252               | 0.253       | 12423           | 1090              | 887           | 199           | 0.183   | 26792           | 2858              | 2851          | 0             | 0.000   | 22357            | 2518               | 2516           | 0              | 0.000    |
| 481668 | 5   | 40959580  | 40959580  | T         | C       | C7          | missense                    | c.1519          | p.S507P           | tier1 | 7747               | 819                  | 809              | 10               | 0.012      | 7204                | 885                   | 667               | 210               | 0.239       | 8286            | 866               | 706           | 159           | 0.184   | 18259           | 2312              | 2310          | 0             | 0.000   | 16683            | 2352               | 2349           | 0              | 0.000    |
| 481668 | 6   | 31760727  | 31760727  | G         | C       | VAR5        | 5_prime_untranslated_region | c.-31760727     | NULL              | tier3 | 24956              | 2944                 | 2901             | 35               | 0.012      | 20786               | 2318                  | 1680              | 611               | 0.267       | 23466           | 2570              | 1914          | 629           | 0.247   | 43507           | 5492              | 5491          | 0             | 0.000   | 48077            | 6563               | 6556           | 0              | 0.000    |
| 481668 | 6   | 135513482 | 135513482 | A         | G       | MYB         | missense                    | c.548           | p.N183S           | tier1 | 35587              | 3818                 | 3791             | 18               | 0.005      | 26391               | 2634                  | 2017              | 591               | 0.227       | 34159           | 3561              | 2856          | 685           | 0.193   | 76034           | 9071              | 9057          | 0             | 0.000   | 57160            | 7122               | 7118           | 0              | 0.000    |
| 481668 | 7   | 34118627  | 34118627  | C         | T       | BMPER       | missense                    | c.1237          | p.R413C           | tier1 | 14570              | 1549                 | 1549             | 0                | 0.000      | 11823               | 1351                  | 1303              | 44                | 0.033       | 12466           | 1281              | 1227          | 48            | 0.038   | 21312           | 2525              | 2522          | 0             | 0.000   | 28573            | 3860               | 3857           | 2              | 0.000    |
| 481668 | 7   | 81593304  | 81593304  | T         | G       | CACNA2D1    | intronic                    | c.2816+68       | e34+68            | tier3 | 1705               | 109                  | 109              | 0                | 0.000      | 2205                | 196                   | 141               | 53                | 0.273       | 12172           | 170               | 128           | 42            | 0.247   | 3870            | 330               | 329           | 0             | 0.000   | 3117             | 0                  | 0              | 0              | NA       |
| 481668 | 7   | 100635373 | 100635373 | C         | A       | MUC12       | missense                    | c.1529          | p.A510D           | tier1 | 2463               | 396                  | 392              | 4                | 0.010      | 4026                | 708                   | 608               | 96                | 0.136       | 3048            | 458               | 401           | 56            | 0.123   | 3012            | 478               | 478           | 0             | 0.000   | 3124             | 688                | 688            | 0              | 0.000    |
| 481668 | 7   | 148506166 | 148506166 | T         | A       | EZH2        | missense                    | c.2192          | p.Y731F           | tier1 | 8451               | 912                  | 903              | 6                | 0.007      | 8077                | 890                   | 667               | 213               | 0.242       | 9517            | 923               | 727           | 191           | 0.208   | 18595           | 2258              | 2248          | 0             | 0.000   | 18191            | 2380               | 2378           | 0              | 0.000    |
| 481668 | 9   | 117138957 | 117138957 | C         | T       | AKNA        | missense                    | c.1130          | p.R377H           | tier1 | 22983              | 2341                 | 2339             | 0                | 0.000      | 28470               | 2718                  | 2683              | 31                | 0.011       | 33291           | 3187              | 3146          | 36            | 0.011   | 61527           | 6990              | 6987          | 1             | 0.000   | 51395            | 6372               | 6365           | 1              | 0.000    |
| 481668 | 10  | 128933807 | 128933807 | T         | C       | FAM196A     | 3_prime_untranslated_region | c.*2294         | NULL              | tier3 | 21752              | 2267                 | 2260             | 4                | 0.002      | 14782               | 1446                  | 1037              | 402               | 0.279       | 17718           | 1730              | 1335          | 374           | 0.219   | 41494           | 4873              | 4871          | 0             | 0.000   | 35598            | 4377               | 4365           | 0              | 0.000    |
| 481668 | 10  | 133761131 | 133761131 | G         | T       | PPP2R2D     | missense                    | c.825           | p.M275I           | tier1 | 10710              | 988                  | 970              | 17               | 0.017      | 10104               | 1020                  | 715               | 289               | 0.288       | 11101           | 961               | 745           | 202           | 0.243   | 16775           | 1728              | 1717          | 0             | 0.000   | 18919            | 2252               | 2246           | 0              | 0.000    |
| 481668 | 11  | 71903432  | 71903432  | A         | G       | FOLR1       | intronic                    | c.168+47        | e1+47             | tier3 | 14145              | 1616                 | 1592             | 21               | 0.013      | 11382               | 1245                  | 938               | 302               | 0.244       | 13164           | 1428              | 1148          | 272           | 0.192   | 31410           | 3880              | 3875          | 0             | 0.000   | 26207            | 3615               | 3609           | 0              | 0.000    |
| 481668 | 12  | 21608977  | 21608977  | G         | T       | PYROXD1     | missense                    | c.698           | p.S233I           | tier1 | 5224               | 530                  | 528              | 2                | 0.004      | 4079                | 411                   | 310               | 101               | 0.264       | 4963            | 511               | 393           | 114           | 0.223   | 11108           | 1256              | 1255          | 0             | 0.000   | 7277             | 0                  | 0              | 0              | NA       |
| 481668 | 12  | 113599210 | 113599210 | C         | A       | DDX54       | rna                         | NULL            | NULL              | tier1 | 20029              | 2240                 | 2213             | 24               | 0.011      | 13203               | 1300                  | 974               | 316               | 0.245       | 15970           | 1689              | 1421          | 260           | 0.155   | 43807           | 5340              | 5338          | 0             | 0.000   | 33543            | 4263               | 4263           | 0              | 0.000    |
| 481668 | 13  | 33223009  | 33223009  | C         | T       | PDS5B       | nonsense                    | c.100           | p.R34*            | tier1 | 16363              | 1781                 | 1779             | 2                | 0.001      | 12157               | 1188                  | 927               | 251               | 0.213       | 14519           | 1510              | 1322          | 180           | 0.120   | 34218           | 4018              | 4016          | 0             | 0.000   | 25116            | 3035               | 3032           | 0              | 0.000    |
| 481668 | 15  | 56704519  | 56704519  | G         | A       | TEX9        | missense                    | c.848           | p.R283K           | tier1 | 2211               | 293                  | 280              | 9                | 0.031      | 1985                | 289                   | 210               | 76                | 0.266       | 2392            | 295               | 233           | 58            | 0.199   | 3371            | 475               | 474           | 0             | 0.000   | 3742             | 651                | 640            | 0              | 0.000    |
| 481668 | 16  | 30456662  | 30456662  | C         | T       | SEPHS2      | silent                      | c.216           | p.G72             | tier1 | 12494              | 1355                 | 1353             | 2                | 0.001      | 13959               | 1454                  | 1178              | 269               | 0.186       | 16910           | 1703              | 1432          | 263           | 0.155   | 43178           | 5513              | 5510          | 0             | 0.000   | 38962            | 5225               | 5222           | 0              | 0.000    |
| 481668 | 17  | 1559855   | 1559855   | T         | C       | PRPF8       | missense                    | c.5624          | p.H1875R          | tier1 | 15946              | 1834                 | 1797             | 34               | 0.019      | 16758               | 1956                  | 1420              | 510               | 0.264       | 19459           | 2136              | 1660          | 453           | 0.213   | 31923           | 4209              | 4197          | 0             | 0.000   | 34447            | 4901               | 4898           | 0              | 0.000    |
| 481668 | 17  | 37425012  | 37425012  | A         | G       | FBXL20      | intronic                    | c.933+68        | e12+68            | tier3 | 10846              | 1172                 | 1165             | 7                | 0.006      | 10269               | 1198                  | 982               | 211               | 0.177       | 10353           | 1111              | 989           | 120           | 0.108   | 28442           | 3479              | 3474          | 0             | 0.000   | 15377            | 2154               | 2153           | 0              | 0.000    |
| 481668 | 17  | 37879957  | 37879957  | C         | T       | ERBB2       | intronic                    | c.2208+44       | e18+44            | tier3 | 5212               | 521                  | 520              | 0                | 0.000      | 6237                | 677                   | 512               | 159               | 0.237       | 6555            | 617               | 498           | 115           | 0.188   | 13991           | 1512              | 1504          | 0             | 0.000   | 14415            | 1838               | 1837           | 1              | 0.000    |
| 481668 | 19  | 9067438   | 9067438   | C         | T       | MUC16       | missense                    | c.20008         | p.V6670I          | tier1 | 19427              | 2262                 | 2245             | 15               | 0.007      | 19226               | 2052                  | 1714              | 324               | 0.159       | 21888           | 2334              | 1986          | 340           | 0.146   | 30956           | 3817              | 3813          | 0             | 0.000   | 34532            | 4457               | 4456           | 0              | 0.000    |
| 481668 | 19  | 15219913  | 15219913  | C         | G       | SYDE1       | silent                      | c.135           | p.P45             | tier1 | 4176               | 377                  | 368              | 8                | 0.021      | 5572                | 568                   | 342               | 223               | 0.395       | 5464            | 497               | 328           | 166           | 0.336   | 7978            | 724               | 721           | 1             | 0.000   | 9781             | 1307               | 1306           | 0              | 0.000    |
| 485523 | 4   | 39474726  | 39474726  | G         | A       | LIAS        | missense                    | c.961           | p.E321K           | tier1 | 3132               | 0                    | 0                | 0                | 0.000      | 2170                | 258                   | 246               | 12                | 0.047       | 1363            | 116               | 115           | 1             | 0.000   | 1319            | 141               | 141           | 0             | 0.000   | 3714             | 578                | 576            | 2              | 0.000    |
| 485523 | 4   | 55976980  | 55976980  | G         | A       | KDR         | intronic                    | c.977-45        | e8-45             | tier3 | 10736              | 1448                 | 1448             | 0                | 0.000      | 6523                | 861                   | 808               | 48                | 0.056       | 5751            | 648               | 645           | 2             | 0.000   | 4205            | 454               | 454           | 0             | 0.000   | 13940            | 2116               | 2116           | 0              | 0.000    |
| 485523 | 5   | 176939370 | 176939370 | C         | T       | DDX41       | missense                    | c.1574          | p.R525H           | tier1 | 15143              | 1773                 | 1771             | 2                | 0.001      | 9232                | 1070                  | 965               | 101               | 0.095       | 6583            | 566               | 558           | 3             | 0.000   | 5809            | 622               | 621           | 0             | 0.000   | 17630            | 2449               | 2439           | 5              | 0.000    |
| 485523 | 6   | 73904728  | 73904728  | A         | T       | KCNQ5       | missense                    | c.2420          | p.N807I           | tier1 | 4057               | 669                  | 668              | 0                | 0.000      | 3091                | 499                   | 451               | 46                | 0.093       | 517             | 55                | 54            | 0             | 0.000   | 536             | 52                | 52            | 0             | 0.000   | 2353             | 568                | 567            | 0              | 0.000    |
| 485523 | 14  | 24517447  | 24517447  | G         | A       | DHRS4L1     | rna                         | NULL            | NULL              | tier1 | 16574              | 1653                 | 1652             | 0                | 0.000      | 12727               | 1385                  | 1281              | 99                | 0.072       | 8756            | 776               | 773           | 2             | 0.000   | 7359            | 814               | 813           | 0             | 0.000   | 23426            | 3123               | 3117           | 2              | 0.       |



| UPN    | Chr | Start     | Stop      | Reference | Variant | Gene Symbol     | Mutation Type               | Coding Position | Amino Acid Change | Tier  | Normal Total Count | Normal Unique Count* | Normal Ref Count | Normal Var Count | Normal VAF | Initial Total Count | Initial Unique Count* | Initial Ref Count | Initial Var Count | Initial VAF | Pre Total Count | Pre Unique Count* | Pre Ref Count | Pre Var Count | Pre VAF | D30 Total Count | D30 Unique Count | D30 Ref Count | D30 Var Count | D30 VAF | D100 Total Count | D100 Unique Count* | D100 Ref Count | D100 Var Count | D100 VAF |
|--------|-----|-----------|-----------|-----------|---------|-----------------|-----------------------------|-----------------|-------------------|-------|--------------------|----------------------|------------------|------------------|------------|---------------------|-----------------------|-------------------|-------------------|-------------|-----------------|-------------------|---------------|---------------|---------|-----------------|------------------|---------------|---------------|---------|------------------|--------------------|----------------|----------------|----------|
| 489196 | 21  | 45820168  | 45820168  | C         | T       | TRPM2           | silent                      | c.2235          | p.G745            | tier1 | 34108              | 4082                 | 4056             | 22               | 0.005      | 34778               | 4093                  | 2798              | 1222              | 0.304       | NA              | NA                | NA            | NA            | NA      | 75462           | 10316            | 10286         | 12            | 0.001   | 54985            | 7242               | 7236           | 0              | 0.000    |
| 489196 | 22  | 46677825  | 46677825  | G         | A       | TTC38           | intronic                    | c.561+210       | e6+210            | tier3 | 34260              | 4122                 | 4102             | 16               | 0.004      | 26194               | 2932                  | 2248              | 660               | 0.227       | NA              | NA                | NA            | NA            | NA      | 73321           | 9718             | 9703          | 6             | 0.001   | 46987            | 5789               | 5785           | 0              | 0.000    |
| 489196 | X   | 73041567  | 73041567  | C         | T       | XIST            | rna                         | NULL            | NULL              | tier1 | 11895              | 1242                 | 1230             | 10               | 0.008      | 9624                | 973                   | 706               | 265               | 0.273       | NA              | NA                | NA            | NA            | NA      | 13631           | 1661             | 1654          | 6             | 0.004   | 8642             | 995                | 994            | 1              | 0.000    |
| 489196 | X   | 153049418 | 153049418 | C         | G       | SRPK3           | intronic                    | c.908-11        | e10-11            | tier3 | 5196               | 437                  | 435              | 2                | 0.005      | 4626                | 478                   | 332               | 143               | 0.301       | NA              | NA                | NA            | NA            | NA      | 3137            | 347              | 345           | 2             | 0.000   | 3545             | 393                | 393            | 0              | 0.000    |
| 489196 | X   | 153799950 | 153799950 | G         | A       | G6PD            | 5_prime_flanking_region     | c.-25580        | NULL              | tier3 | 11537              | 1214                 | 1213             | 0                | 0.000      | 9553                | 1134                  | 1084              | 35                | 0.031       | NA              | NA                | NA            | NA            | NA      | 10962           | 1440             | 1424          | 0             | 0.000   | 11745            | 1444               | 1439           | 0              | 0.000    |
| 489513 | 1   | 173684860 | 173684860 | A         | G       | KLHL20          | intronic                    | c.1-282         | e1-282            | tier2 | 7687               | 1062                 | 1032             | 29               | 0.027      | 3661                | 447                   | 219               | 227               | 0.509       | NA              | NA                | NA            | NA            | NA      | 3526            | 670              | 666           | 4             | 0.006   | NA               | NA                 | NA             | NA             | NA       |
| 489513 | 1   | 240351440 | 240351440 | T         | C       | FMN2            | intronic                    | c.1931-67       | e4-67             | tier3 | 1690               | 178                  | 176              | 2                | 0.011      | 942                 | 82                    | 36                | 46                | 0.561       | NA              | NA                | NA            | NA            | NA      | 2941            | 393              | 384           | 9             | 0.023   | NA               | NA                 | NA             | NA             | NA       |
| 489513 | 3   | 42735190  | 42735190  | C         | T       | HHATL           | nonsense                    | c.1167          | p.W389*           | tier1 | 42803              | 6640                 | 6483             | 147              | 0.022      | 15733               | 2200                  | 1175              | 1001              | 0.460       | NA              | NA                | NA            | NA            | NA      | 39384           | 5362             | 5286          | 68            | 0.013   | NA               | NA                 | NA             | NA             | NA       |
| 489513 | 3   | 46792243  | 46792243  | C         | T       | PRSS50          | intronic                    | c.1-2102        | e1-2102           | tier2 | 2747               | 488                  | 473              | 15               | 0.031      | 1107                | 163                   | 100               | 62                | 0.383       | NA              | NA                | NA            | NA            | NA      | 1506            | 306              | 303           | 3             | 0.010   | NA               | NA                 | NA             | NA             | NA       |
| 489513 | 3   | 53844274  | 53844274  | C         | T       | CACNA1D         | silent                      | c.6201          | p.F2067           | tier1 | 41736              | 5111                 | 4999             | 105              | 0.021      | 17998               | 1858                  | 1010              | 823               | 0.449       | NA              | NA                | NA            | NA            | NA      | 42641           | 5681             | 5590          | 72            | 0.013   | NA               | NA                 | NA             | NA             | NA       |
| 489513 | 4   | 152498539 | 152498539 | G         | A       | FAM160A1        | intronic                    | c.106-63        | e2-63             | tier3 | 18260              | 2039                 | 1984             | 52               | 0.026      | 7899                | 824                   | 443               | 374               | 0.458       | NA              | NA                | NA            | NA            | NA      | 10697           | 1601             | 1578          | 19            | 0.012   | NA               | NA                 | NA             | NA             | NA       |
| 489513 | 5   | 20304957  | 20304957  | G         | T       | ENSG00000214132 | 5_prime_untranslated_region | c.-20304957     | NULL              | tier3 | 3140               | 609                  | 601              | 8                | 0.013      | 2086                | 339                   | 191               | 146               | 0.433       | NA              | NA                | NA            | NA            | NA      | 3159            | 738              | 730           | 7             | 0.009   | NA               | NA                 | NA             | NA             | NA       |
| 489513 | 5   | 137680472 | 137680472 | T         | C       | FAM53C          | intronic                    | c.137-42        | e3-42             | tier4 | 5474               | 558                  | 547              | 10               | 0.018      | 2653                | 220                   | 124               | 95                | 0.434       | NA              | NA                | NA            | NA            | NA      | 2757            | 365              | 362           | 3             | 0.008   | NA               | NA                 | NA             | NA             | NA       |
| 489513 | 6   | 41011404  | 41011404  | G         | T       | TSPO2           | silent                      | c.282           | p.L94             | tier1 | 11098              | 2070                 | 2003             | 64               | 0.031      | 6397                | 997                   | 553               | 441               | 0.444       | NA              | NA                | NA            | NA            | NA      | 8035            | 1795             | 1781          | 13            | 0.007   | NA               | NA                 | NA             | NA             | NA       |
| 489513 | 7   | 131844359 | 131844359 | G         | C       | PLXNA4          | missense                    | c.4533          | p.N1511K          | tier1 | 24100              | 2980                 | 2902             | 76               | 0.026      | 11137               | 1173                  | 659               | 502               | 0.432       | NA              | NA                | NA            | NA            | NA      | 24642           | 3512             | 3457          | 47            | 0.013   | NA               | NA                 | NA             | NA             | NA       |
| 489513 | 8   | 56367730  | 56367730  | C         | T       | XKR4            | intronic                    | c.1007-68110    | e3-68110          | tier2 | 14043              | 1674                 | 1627             | 47               | 0.028      | 5091                | 474                   | 268               | 205               | 0.433       | NA              | NA                | NA            | NA            | NA      | 17876           | 2343             | 2320          | 17            | 0.007   | NA               | NA                 | NA             | NA             | NA       |
| 489513 | 9   | 16215272  | 16215272  | C         | T       | C9orf92         | missense                    | c.196           | p.G66R            | tier1 | 41132              | 5051                 | 4945             | 100              | 0.020      | 12803               | 1316                  | 734               | 549               | 0.421       | NA              | NA                | NA            | NA            | NA      | 27768           | 3830             | 3790          | 32            | 0.008   | NA               | NA                 | NA             | NA             | NA       |
| 489513 | 9   | 32974446  | 32974446  | C         | T       | APT7            | splice_region               | c.916+10        | e7+10             | tier3 | 5780               | 577                  | 569              | 8                | 0.014      | 4635                | 423                   | 234               | 187               | 0.444       | NA              | NA                | NA            | NA            | NA      | 12127           | 1671             | 1649          | 17            | 0.010   | NA               | NA                 | NA             | NA             | NA       |
| 489513 | 9   | 101798470 | 101798470 | G         | C       | COL15A1         | missense                    | c.2308          | p.G770R           | tier1 | 13774              | 1387                 | 1357             | 27               | 0.020      | 5729                | 537                   | 284               | 248               | 0.466       | NA              | NA                | NA            | NA            | NA      | 5617            | 778              | 762           | 14            | 0.018   | NA               | NA                 | NA             | NA             | NA       |
| 489513 | 9   | 136402651 | 136402651 | G         | A       | ADAMTSL2        | missense                    | c.542           | p.R181Q           | tier1 | 54189              | 7103                 | 6931             | 157              | 0.022      | 18674               | 2142                  | 1309              | 805               | 0.361       | NA              | NA                | NA            | NA            | NA      | 44383           | 6365             | 6318          | 41            | 0.006   | NA               | NA                 | NA             | NA             | NA       |
| 489513 | 10  | 48373412  | 48373412  | G         | A       | ZNF488          | 3_prime_untranslated_region | c.*1857         | NULL              | tier3 | 3512               | 641                  | 618              | 22               | 0.034      | 1407                | 214                   | 118               | 96                | 0.449       | NA              | NA                | NA            | NA            | NA      | 1268            | 264              | 262           | 2             | 0.000   | NA               | NA                 | NA             | NA             | NA       |
| 489513 | 10  | 87615842  | 87615842  | G         | A       | GRID1           | missense                    | c.1057          | p.R353W           | tier1 | 23954              | 3097                 | 3094             | 2                | 0.001      | 10954               | 1260                  | 1204              | 49                | 0.039       | NA              | NA                | NA            | NA            | NA      | 20858           | 3054             | 3041          | 2             | 0.000   | NA               | NA                 | NA             | NA             | NA       |
| 489513 | 12  | 130883190 | 130883190 | C         | A       | RIMBP2          | 3_prime_untranslated_region | c.*490          | NULL              | tier3 | 4458               | 545                  | 535              | 10               | 0.018      | 6367                | 710                   | 404               | 297               | 0.424       | NA              | NA                | NA            | NA            | NA      | 9049            | 1279             | 1263          | 14            | 0.011   | NA               | NA                 | NA             | NA             | NA       |
| 489513 | 15  | 97634474  | 97634474  | A         | G       | ENSG00000215948 | 3_prime_flanking_region     | c.*18           | NULL              | tier4 | 18333              | 2225                 | 2172             | 51               | 0.023      | 6681                | 641                   | 372               | 265               | 0.416       | NA              | NA                | NA            | NA            | NA      | 17743           | 2529             | 2500          | 24            | 0.010   | NA               | NA                 | NA             | NA             | NA       |
| 489513 | 17  | 78180746  | 78180746  | C         | T       | SGSH            | rna                         | NULL            | NULL              | tier1 | 56063              | 7291                 | 7156             | 123              | 0.017      | 16485               | 1730                  | 951               | 754               | 0.442       | NA              | NA                | NA            | NA            | NA      | 57883           | 7469             | 7371          | 85            | 0.011   | NA               | NA                 | NA             | NA             | NA       |
| 489513 | 18  | 72113811  | 72113811  | C         | G       | FAM69C          | intronic                    | c.876+30        | e2+30             | tier3 | 22786              | 3096                 | 3027             | 65               | 0.021      | 9806                | 1085                  | 602               | 469               | 0.438       | NA              | NA                | NA            | NA            | NA      | 20954           | 3102             | 3053          | 42            | 0.014   | NA               | NA                 | NA             | NA             | NA       |
| 489513 | 19  | 40834389  | 40834389  | C         | T       | C19orf47        | missense                    | c.481           | p.D161N           | tier1 | 58706              | 7545                 | 7359             | 172              | 0.023      | 20482               | 2078                  | 1112              | 930               | 0.455       | NA              | NA                | NA            | NA            | NA      | 51235           | 6581             | 6471          | 96            | 0.015   | NA               | NA                 | NA             | NA             | NA       |
| 489513 | 19  | 59081697  | 59081697  | G         | A       | MZF1            | 5_prime_untranslated_region | c.-59081697     | NULL              | tier3 | 8951               | 1997                 | 1910             | 83               | 0.042      | 3245                | 570                   | 47                | 522               | 0.917       | NA              | NA                | NA            | NA            | NA      | 2154            | 532              | 520           | 11            | 0.021   | NA               | NA                 | NA             | NA             | NA       |
| 489513 | 20  | 18772588  | 18772588  | G         | A       | LINC00652       | rna                         | NULL            | NULL              | tier1 | 23487              | 3150                 | 3069             | 76               | 0.024      | 13692               | 1603                  | 864               | 721               | 0.455       | NA              | NA                | NA            | NA            | NA      | 27964           | 4395             | 4325          | 60            | 0.014   | NA               | NA                 | NA             | NA             | NA       |
| 489513 | 21  | 31964779  | 31964779  | C         | T       | KRTAP6-3        | 5_prime_untranslated_region | c.-7            | NULL              | tier3 | 20233              | 2641                 | 2574             | 67               | 0.025      | 15439               | 1508                  | 837               | 653               | 0.438       | NA              | NA                | NA            | NA            | NA      | 40721           | 5091             | 5022          | 60            | 0.012   | NA               | NA                 | NA             | NA             | NA       |
| 489513 | 21  | 44524456  | 44524456  | G         | T       | UZAF1           | missense                    | c.101           | p.S34Y            | tier1 | 12826              | 1791                 | 1765             | 24               | 0.013      | 4167                | 535                   | 318               | 215               | 0.403       | NA              | NA                | NA            | NA            | NA      | 15729           | 2277             | 2264          | 13            | 0.006   | NA               | NA                 | NA             | NA             | NA       |
| 489513 | X   | 118215369 | 118215369 | G         | A       | KIAA1210        | missense                    | c.5053          | p.P1685S          | tier1 | 4732               | 565                  | 538              | 26               | 0.046      | 2442                | 275                   | 17                | 256               | 0.938       | NA              | NA                | NA            | NA            | NA      | 4732            | 673              | 657           | 16            | 0.024   | NA               | NA                 | NA             | NA             | NA       |
| 491309 | 17  | 7577580   | 7577580   | T         | C       | TP53            | missense                    | c.701           | p.Y234C           | tier1 | 24823              | 3109                 | 3103             | 2                | 0.001      | 48885               | 5769                  | 5602              | 138               | 0.024       | 65674           | 8304              | 7619          | 641           | 0.078   | 109990          | 14706            | 14602         | 80            | 0.005   | NA               | NA                 | NA             | NA             | NA       |
| 491309 | 19  | 16629981  | 16629981  | C         | T       | CHERP           | missense                    | c.2740          | p.E914K           | tier1 | 9280               | 1125                 | 1121             | 4                | 0.004      | 16539               | 2098                  | 1986              | 105               | 0.050       | 18651           | 2178              | 2121          | 54            | 0.025   | 23755           | 2963             | 2952          | 7             | 0.002   | NA               | NA                 | NA             | NA             | NA       |
| 496321 | 1   | 986249    | 986249    | C         | T       | AGRN            | intronic                    | c.5253+32       | e30+32            | tier2 | 6395               | 552                  | 517              | 35               | 0.063      | 8718                | 816                   | 416               | 392               | 0.485       | 772             | 719               | 2             | 0.000         | 14977   | 1510            | 1509             | 0             | 0.000         | 15007   | 0                | 0                  | 0              | 0              | NA       |
| 496321 | 1   | 47276735  | 47276735  | G         | A       | CYP4B1          | intronic                    | c.323-77        | e3-77             | tier3 | 4197               | 345                  | 326              | 18               | 0.052      | 11848               | 1385                  | 733               | 633               | 0.463       | 11871           | 1413              | 1410          | 0             | 0.000   | 17351           | 1849             | 1843          | 0             | 0.000   | 20371            |                    |                |                |          |

| UPN    | Chr | Start     | Stop      | Reference | Variant | Gene Symbol     | Mutation Type               | Coding Position | Amino Acid Change | Tier  | Normal Total Count | Normal Unique Count* | Normal Ref Count | Normal Var Count | Normal VAF | Initial Total Count | Initial Unique Count* | Initial Ref Count | Initial Var Count | Initial VAF | Pre Total Count | Pre Unique Count* | Pre Ref Count | Pre Var Count | Pre VAF | D30 Total Count | D30 Unique Count* | D30 Ref Count | D30 Var Count | D30 VAF | D100 Total Count | D100 Unique Count* | D100 Ref Count | D100 Var Count | D100 VAF |
|--------|-----|-----------|-----------|-----------|---------|-----------------|-----------------------------|-----------------|-------------------|-------|--------------------|----------------------|------------------|------------------|------------|---------------------|-----------------------|-------------------|-------------------|-------------|-----------------|-------------------|---------------|---------------|---------|-----------------|-------------------|---------------|---------------|---------|------------------|--------------------|----------------|----------------|----------|
| 502635 | 4   | 119644046 | 119644046 | T         | C       | SEC24D          | rna                         | NULL            | NULL              | tier1 | 1320               | 161                  | 160              | 0                | 0.000      | 1910                | 212                   | 202               | 9                 | 0.043       | 3521            | 406               | 402           | 4             | 0.010   | 746             | 68                | 59            | 9             | 0.132   | NA               | NA                 | NA             | NA             | NA       |
| 502635 | 4   | 129192341 | 129192341 | A         | G       | PGRMC2          | 3_prime_untranslated_region | c.*130          | NULL              | tier3 | 6482               | 696                  | 694              | 1                | 0.001      | 7016                | 734                   | 664               | 69                | 0.094       | 11664           | 1107              | 1088          | 18            | 0.016   | 3708            | 265               | 226           | 38            | 0.144   | NA               | NA                 | NA             | NA             | NA       |
| 502635 | 11  | 89515227  | 89515227  | G         | T       | TRIM64DP        | 3_prime_untranslated_region | c.*89515227     | NULL              | tier3 | 2097               | 0                    | 0                | 0                | 0.000      | 3679                | 346                   | 327               | 18                | 0.052       | 6779            | 607               | 593           | 14            | 0.023   | 1074            | 64                | 55            | 9             | 0.141   | NA               | NA                 | NA             | NA             | NA       |
| 502635 | 12  | 119583250 | 119583250 | G         | A       | SRRM4           | missense                    | c.836           | p.R279Q           | tier1 | 29334              | 3284                 | 3278             | 2                | 0.001      | 19115               | 2254                  | 2051              | 190               | 0.085       | 24188           | 2596              | 2546          | 43            | 0.017   | 10772           | 836               | 713           | 116           | 0.140   | NA               | NA                 | NA             | NA             | NA       |
| 502635 | 13  | 101881935 | 101881935 | C         | T       | NALCN           | missense                    | c.1435          | p.V479I           | tier1 | 4923               | 554                  | 554              | 0                | 0.000      | 6221                | 718                   | 666               | 50                | 0.070       | 9292            | 966               | 953           | 13            | 0.013   | 2741            | 225               | 201           | 23            | 0.103   | NA               | NA                 | NA             | NA             | NA       |
| 502635 | 15  | 31086780  | 31086780  | G         | T       | GOLGA8UP        | 3_prime_untranslated_region | c.*31086780     | NULL              | tier3 | 10486              | 1232                 | 1230             | 1                | 0.001      | 13369               | 1508                  | 1435              | 71                | 0.047       | 10850           | 1174              | 1154          | 19            | 0.016   | 7523            | 517               | 489           | 24            | 0.047   | NA               | NA                 | NA             | NA             | NA       |
| 502635 | 15  | 43995984  | 43995984  | C         | G       | STRC            | intronic                    | c.1+14335       | e0+14335          | tier3 | 767                | 138                  | 137              | 0                | 0.000      | 662                 | 102                   | 99                | 3                 | 0.029       | 846             | 107               | 104           | 3             | 0.028   | 515             | 56                | 48            | 8             | 0.143   | NA               | NA                 | NA             | NA             | NA       |
| 502635 | 17  | 7577538   | 7577538   | C         | T       | TP53            | missense                    | c.743           | p.R248Q           | tier1 | 38153              | 4433                 | 4425             | 6                | 0.001      | 32945               | 3829                  | 3532              | 283               | 0.074       | 28494           | 3174              | 3108          | 63            | 0.020   | 15180           | 1077              | 928           | 139           | 0.130   | NA               | NA                 | NA             | NA             | NA       |
| 502635 | 17  | 7578551   | 7578551   | A         | T       | TP53            | missense                    | c.379           | p.S127T           | tier1 | 13818              | 1658                 | 1655             | 1                | 0.001      | 16613               | 1916                  | 1722              | 184               | 0.097       | 12532           | 1356              | 1324          | 30            | 0.022   | 8583            | 676               | 560           | 110           | 0.164   | NA               | NA                 | NA             | NA             | NA       |
| 502635 | 19  | 852255    | 852255    | G         | T       | ELANE           | 5_prime_untranslated_region | c.-74           | NULL              | tier2 | 4171               | 489                  | 487              | 2                | 0.004      | 3406                | 404                   | 371               | 32                | 0.079       | 3728            | 337               | 330           | 5             | 0.015   | 1862            | 171               | 148           | 21            | 0.124   | NA               | NA                 | NA             | NA             | NA       |
| 565435 | 1   | 114641862 | 114641862 | G         | A       | SYT6            | silent                      | c.1218          | p.L406            | tier1 | 13332              | 1460                 | 1436             | 21               | 0.014      | 12358               | 1356                  | 1011              | 336               | 0.249       | 13950           | 2053              | 1500          | 545           | 0.267   | 30410           | 4732              | 4706          | 23            | 0.005   | 21075            | 2074               | 2071           | 0              | 0.000    |
| 565435 | 2   | 86267544  | 86267544  | G         | A       | POLR1A          | silent                      | c.3711          | p.G1237           | tier1 | 15427              | 1412                 | 1395             | 16               | 0.011      | 16396               | 1788                  | 1789              | 479               | 0.270       | 13673           | 1612              | 1140          | 468           | 0.291   | 34567           | 3791              | 3764          | 23            | 0.006   | 20206            | 1117               | 1113           | 2              | 0.000    |
| 565435 | 2   | 97849131  | 97849131  | A         | G       | ANKRD36         | intronic                    | c.1838-65       | e27-65            | tier3 | 528                | 46                   | 45               | 1                | 0.022      | 1085                | 113                   | 85                | 28                | 0.248       | 765             | 93                | 70            | 22            | 0.239   | 1638            | 370               | 368           | 2             | 0.000   | 3649             | 0                  | 0              | 0              | NA       |
| 565435 | 2   | 130750444 | 130750444 | C         | T       | ENSG00000250207 | 5_prime_untranslated_region | c.-130750444    | NULL              | tier2 | 351                | 26                   | 25               | 0                | 0.000      | 636                 | 61                    | 48                | 12                | 0.200       | 355             | 41                | 24            | 17            | 0.415   | 563             | 120               | 119           | 1             | 0.000   | 1926             | 339                | 338            | 0              | 0.000    |
| 565435 | 2   | 219267322 | 219267322 | C         | A       | CTDSP1          | intronic                    | c.378+194       | e4+194            | tier3 | 8388               | 714                  | 711              | 2                | 0.003      | 7748                | 826                   | 714               | 105               | 0.128       | 4564            | 597               | 463           | 137           | 0.222   | 19292           | 2606              | 2603          | 3             | 0.001   | 14893            | 1211               | 1210           | 0              | 0.000    |
| 565435 | 3   | 44776777  | 44776777  | T         | C       | ZNF501          | 3_prime_untranslated_region | c.*48           | NULL              | tier3 | 7090               | 579                  | 573              | 5                | 0.009      | 7945                | 811                   | 649               | 160               | 0.198       | 11616           | 1406              | 1190          | 216           | 0.154   | 31913           | 4940              | 4926          | 14            | 0.003   | 17342            | 2067               | 2063           | 0              | 0.000    |
| 565435 | 3   | 133465239 | 133465239 | A         | G       | TF              | 5_prime_untranslated_region | c.-46           | NULL              | tier2 | 3473               | 238                  | 235              | 3                | 0.013      | 3364                | 269                   | 192               | 76                | 0.284       | 1841            | 165               | 123           | 42            | 0.255   | 8407            | 1147              | 1140          | 7             | 0.006   | 5576             | 0                  | 0              | 0              | NA       |
| 565435 | 3   | 155314188 | 155314188 | T         | C       | PLCH1           | intronic                    | c.44-21         | e2-21             | tier3 | 9276               | 793                  | 785              | 7                | 0.009      | 8745                | 953                   | 753               | 191               | 0.203       | 14495           | 1629              | 1288          | 339           | 0.208   | 27101           | 3325              | 3311          | 11            | 0.003   | 15555            | 1226               | 1221           | 0              | 0.000    |
| 565435 | 3   | 185300560 | 185300560 | G         | C       | SENP2           | missense                    | c.26            | p.C9S             | tier1 | 9745               | 864                  | 851              | 12               | 0.014      | 14733               | 1605                  | 1208              | 385               | 0.242       | 13183           | 1730              | 1266          | 452           | 0.263   | 32185           | 4173              | 4144          | 23            | 0.006   | 24573            | 1659               | 1655           | 0              | 0.000    |
| 565435 | 4   | 73615881  | 73615881  | G         | A       | -               | -                           | -               | -                 | tier3 | 26937              | 2477                 | 2430             | 43               | 0.017      | 26692               | 2859                  | 2248              | 589               | 0.208       | 26582           | 3244              | 2500          | 771           | 0.235   | 76644           | 8771              | 8732          | 32            | 0.004   | 36637            | 2514               | 2513           | 0              | 0.000    |
| 565435 | 5   | 13900350  | 13900350  | G         | A       | DNAH5           | nonsense                    | c.2224          | p.R742*           | tier1 | 5591               | 438                  | 434              | 4                | 0.009      | 4799                | 460                   | 353               | 96                | 0.214       | 7223            | 868               | 628           | 234           | 0.271   | 13127           | 2282              | 2253          | 22            | 0.010   | 11748            | 1543               | 1541           | 0              | 0.000    |
| 565435 | 5   | 43295963  | 43295963  | G         | A       | HMGCS1          | missense                    | c.796           | p.P266S           | tier1 | 4562               | 289                  | 279              | 7                | 0.024      | 4865                | 382                   | 280               | 99                | 0.261       | 8802            | 864               | 619           | 240           | 0.279   | 15512           | 2493              | 2475          | 12            | 0.005   | 11081            | 1346               | 1344           | 0              | 0.000    |
| 565435 | 6   | 31974832  | 31974832  | G         | A       | CYP21A1P        | 3_prime_untranslated_region | c.*31974832     | NULL              | tier3 | 19729              | 1949                 | 1903             | 31               | 0.016      | 30673               | 3473                  | 2601              | 848               | 0.246       | 21705           | 2676              | 2013          | 650           | 0.244   | 65202           | 6589              | 6567          | 18            | 0.003   | 30819            | 1590               | 1588           | 0              | 0.000    |
| 565435 | 6   | 54208081  | 54208081  | C         | T       | TINAG           | missense                    | c.682           | p.P228S           | tier1 | 12078              | 986                  | 968              | 17               | 0.017      | 10417               | 1004                  | 729               | 273               | 0.272       | 13417           | 1445              | 1043          | 387           | 0.271   | 32114           | 4012              | 3989          | 22            | 0.005   | 14691            | 1140               | 1138           | 0              | 0.000    |
| 565435 | 6   | 80774316  | 80774316  | T         | G       | ENSG00000218418 | 5_prime_untranslated_region | c.-80774316     | NULL              | tier3 | 634                | 69                   | 69               | 0                | 0.000      | 1258                | 155                   | 116               | 37                | 0.242       | 732             | 108               | 73            | 35            | 0.324   | 2184            | 503               | 501           | 2             | 0.000   | 3436             | 475                | 475            | 0              | 0.000    |
| 565435 | 7   | 5434025   | 5434025   | A         | T       | TNRC18          | intronic                    | c.343+46        | e2+46             | tier3 | 28683              | 2819                 | 2744             | 69               | 0.025      | 38038               | 4331                  | 3092              | 1173              | 0.275       | 21117           | 2581              | 1840          | 726           | 0.283   | 81084           | 8697              | 8607          | 72            | 0.008   | 39889            | 2285               | 2281           | 0              | 0.000    |
| 565435 | 7   | 122255199 | 122255199 | A         | C       | CADPS2          | intronic                    | c.1223+36       | e6+36             | tier3 | 16095              | 1339                 | 1324             | 14               | 0.010      | 13338               | 1225                  | 870               | 348               | 0.286       | 20287           | 2269              | 1663          | 594           | 0.263   | 37377           | 4585              | 4559          | 22            | 0.005   | 20122            | 1472               | 1469           | 0              | 0.000    |
| 565435 | 7   | 150894251 | 150894251 | C         | T       | IQCA1P1         | intronic                    | c.NULL          | NULL              | tier3 | 18487              | 2029                 | 2007             | 19               | 0.009      | 17305               | 2041                  | 1617              | 413               | 0.203       | 13181           | 1698              | 1319          | 378           | 0.223   | 46816           | 4639              | 4622          | 13            | 0.003   | 25609            | 1611               | 1611           | 0              | 0.000    |
| 565435 | 8   | 144399939 | 144399939 | G         | A       | TOP1MT          | silent                      | c.1284          | p.Y428            | tier1 | 24944              | 2355                 | 2315             | 28               | 0.012      | 28184               | 3061                  | 2293              | 740               | 0.244       | 23661           | 2765              | 1988          | 765           | 0.278   | 64552           | 7314              | 7266          | 40            | 0.005   | 26804            | 1782               | 1779           | 0              | 0.000    |
| 565435 | 9   | 32631391  | 32631391  | C         | T       | TAFL1           | missense                    | c.4187          | p.R1396H          | tier1 | 7746               | 844                  | 824              | 14               | 0.017      | 6167                | 767                   | 598               | 207               | 0.271       | 8987            | 1462              | 1057          | 394           | 0.272   | 17753           | 3052              | 3028          | 16            | 0.005   | 13268            | 1185               | 1181           | 1              | 0.000    |
| 565435 | 9   | 74299332  | 74299332  | T         | C       | TMEM2           | 5_prime_untranslated_region | c.-74299332     | NULL              | tier3 | 8801               | 690                  | 684              | 5                | 0.007      | 7996                | 721                   | 597               | 121               | 0.169       | 8110            | 889               | 699           | 189           | 0.213   | 27911           | 3462              | 3448          | 13            | 0.004   | 13679            | 1229               | 1229           | 0              | 0.000    |
| 565435 | 9   | 84608191  | 84608191  | T         | C       | SPATA31D1       | missense                    | c.2806          | p.S936P           | tier1 | 13459              | 1305                 | 1287             | 17               | 0.013      | 13293               | 1507                  | 1079              | 414               | 0.277       | 12511           | 1524              | 1118          | 399           | 0.263   | 30199           | 3568              | 3552          | 11            | 0.003   | 17830            | 1385               | 1385           | 0              | 0.000    |
| 565435 | 10  | 95849013  | 95849013  | G         | A       | PLCE1           | silent                      | c.162           | p.Q54             | tier1 | 40409              | 3967                 | 3916             | 47               | 0.012      | 41148               | 4573                  | 3346              | 1164              | 0.258       | 32204           | 3872              | 2697          | 1136          | 0.296   | 113707          | 11487             | 11398         | 72            | 0.006   | 43245            | 2411               | 2411           | 0              | 0.000    |
| 565435 | 11  | 56738588  | 56738588  | G         | A       | OR5AK3P         | 3_prime_untranslated_region | c.*56738588     | NULL              | tier3 | 974                | 104                  | 104              | 0                | 0.000      | 2719                | 366                   | 332               | 32                | 0.088       | 2050            | 355               | 347           | 8             | 0.023   | 5834            | 1395              | 1389          | 4             | 0.003   | 6721             | 0                  | 0              | 0              | NA       |
| 565435 | 14  | 21853909  | 21853909  | C         | T       | CHD8            |                             |                 |                   |       |                    |                      |                  |                  |            |                     |                       |                   |                   |             |                 |                   |               |               |         |                 |                   |               |               |         |                  |                    |                |                |          |

| UPN    | Chr | Start     | Stop      | Reference | Variant | Gene Symbol            | Mutation Type               | Coding Position | Amino Acid Change | Tier  | Normal Total Count | Normal Unique Count* | Normal Ref Count | Normal Var Count | Normal VAF | Initial Total Count | Initial Unique Count* | Initial Ref Count | Initial Var Count | Initial VAF | Pre Total Count | Pre Unique Count* | Pre Ref Count | Pre Var Count | Pre VAF | D30 Total Count | D30 Unique Count | D30 Ref Count | D30 Var Count | D30 VAF | D100 Total Count | D100 Unique Count* | D100 Ref Count | D100 Var Count | D100 VAF |
|--------|-----|-----------|-----------|-----------|---------|------------------------|-----------------------------|-----------------|-------------------|-------|--------------------|----------------------|------------------|------------------|------------|---------------------|-----------------------|-------------------|-------------------|-------------|-----------------|-------------------|---------------|---------------|---------|-----------------|------------------|---------------|---------------|---------|------------------|--------------------|----------------|----------------|----------|
| 597501 | 10  | 135015401 | 135015401 | C         | T       | <i>KNDC1</i>           | missense                    | c.3392          | p.P1131L          | tier1 | 1958               | 243                  | 234              | 9                | 0.037      | 4299                | 445                   | 258               | 186               | 0.419       | NA              | NA                | NA            | NA            | NA      | 5562            | 473              | 466           | 3             | 0.000   | NA               | NA                 | NA             | NA             | NA       |
| 597501 | 11  | 31531364  | 31531364  | C         | T       | <i>ELP4</i>            | silent                      | c.33            | p.A11             | tier1 | 27473              | 3999                 | 3971             | 24               | 0.006      | 19624               | 2414                  | 2007              | 382               | 0.160       | NA              | NA                | NA            | NA            | NA      | 20172           | 1795             | 1782          | 9             | 0.005   | NA               | NA                 | NA             | NA             | NA       |
| 597501 | 12  | 117715866 | 117715866 | C         | A       | <i>NOS1</i>            | missense                    | c.1562          | p.R521L           | tier1 | 3155               | 537                  | 516              | 20               | 0.037      | 3394                | 508                   | 259               | 248               | 0.489       | NA              | NA                | NA            | NA            | NA      | 4660            | 918              | 907           | 7             | 0.008   | NA               | NA                 | NA             | NA             | NA       |
| 597501 | 13  | 25060389  | 25060389  | G         | A       | <i>PARP4</i>           | silent                      | c.1269          | p.T423            | tier1 | 1065               | 174                  | 170              | 4                | 0.023      | 1410                | 234                   | 124               | 110               | 0.470       | NA              | NA                | NA            | NA            | NA      | 1212            | 278              | 277           | 0             | 0.000   | NA               | NA                 | NA             | NA             | NA       |
| 597501 | 14  | 25100251  | 25100251  | G         | A       | <i>GZMB</i>            | 3_prime_untranslated_region | c.*26           | NULL              | tier3 | 22328              | 2840                 | 2769             | 70               | 0.025      | 15565               | 1542                  | 810               | 722               | 0.471       | NA              | NA                | NA            | NA            | NA      | 30947           | 2864             | 2816          | 32            | 0.011   | NA               | NA                 | NA             | NA             | NA       |
| 597501 | 14  | 86089071  | 86089071  | C         | G       | <i>FLRT2</i>           | missense                    | c.1213          | p.L405V           | tier1 | 11507              | 1841                 | 1788             | 53               | 0.029      | 8447                | 1090                  | 621               | 460               | 0.426       | NA              | NA                | NA            | NA            | NA      | 26350           | 2636             | 2613          | 19            | 0.007   | NA               | NA                 | NA             | NA             | NA       |
| 597501 | 15  | 34651895  | 34651895  | C         | T       | <i>LPCAT4</i>          | missense                    | c.1294          | p.G432S           | tier1 | 20898              | 2652                 | 2572             | 73               | 0.028      | 17216               | 1747                  | 1007              | 707               | 0.412       | NA              | NA                | NA            | NA            | NA      | 47201           | 3973             | 3940          | 24            | 0.006   | NA               | NA                 | NA             | NA             | NA       |
| 597501 | 15  | 91574882  | 91574882  | T         | A       | <i>LOC101926911</i>    | intronic                    | c.NULL          | NULL              | tier3 | 134                | 20                   | 19               | 1                | 0.050      | 187                 | 24                    | 19                | 5                 | 0.208       | NA              | NA                | NA            | NA            | NA      | 122             | 31               | 31            | 0             | 0.000   | NA               | NA                 | NA             | NA             | NA       |
| 597501 | 16  | 2522630   | 2522630   | G         | A       | <i>NTN3</i>            | missense                    | c.928           | p.A310T           | tier1 | 10326              | 1406                 | 1373             | 33               | 0.023      | 6192                | 761                   | 444               | 315               | 0.415       | NA              | NA                | NA            | NA            | NA      | 3675            | 500              | 492           | 5             | 0.010   | NA               | NA                 | NA             | NA             | NA       |
| 597501 | 17  | 11532944  | 11532944  | C         | T       | <i>DNAH9</i>           | intronic                    | c.1518+43       | e7+43             | tier3 | 33290              | 4249                 | 4236             | 12               | 0.003      | 19803               | 2073                  | 1984              | 76                | 0.037       | NA              | NA                | NA            | NA            | NA      | 28820           | 2610             | 2604          | 2             | 0.000   | NA               | NA                 | NA             | NA             | NA       |
| 597501 | 17  | 28900664  | 28900664  | C         | T       | <i>LOC101927093</i>    | rna                         | c.NULL          | NULL              | tier1 | 3062               | 551                  | 534              | 17               | 0.031      | 3737                | 478                   | 243               | 231               | 0.487       | NA              | NA                | NA            | NA            | NA      | 4772            | 684              | 675           | 6             | 0.009   | NA               | NA                 | NA             | NA             | NA       |
| 597501 | 17  | 29422352  | 29422352  | T         | G       | <i>NF1</i>             | missense                    | c.25            | p.W9G             | tier1 | 1964               | 236                  | 235              | 1                | 0.004      | 3233                | 309                   | 266               | 40                | 0.131       | NA              | NA                | NA            | NA            | NA      | 1351            | 108              | 108           | 0             | 0.000   | NA               | NA                 | NA             | NA             | NA       |
| 597501 | 17  | 30219342  | 30219342  | C         | G       | <i>UTP6</i>            | missense                    | c.361           | p.A121P           | tier1 | 11134              | 1686                 | 1655             | 29               | 0.017      | 6298                | 726                   | 402               | 319               | 0.442       | NA              | NA                | NA            | NA            | NA      | 20253           | 2333             | 2313          | 16            | 0.007   | NA               | NA                 | NA             | NA             | NA       |
| 597501 | 17  | 74732959  | 74732959  | G         | T       | <i>SRSF2</i>           | missense                    | c.284           | p.P95H            | tier1 | 10293              | 1262                 | 1212             | 49               | 0.039      | 8221                | 963                   | 489               | 448               | 0.478       | NA              | NA                | NA            | NA            | NA      | 14711           | 1525             | 1507          | 17            | 0.011   | NA               | NA                 | NA             | NA             | NA       |
| 597501 | 18  | 29523048  | 29523048  | C         | T       | <i>ENSG00000263823</i> | rna                         | c.NULL          | NULL              | tier1 | 9944               | 1283                 | 1238             | 44               | 0.034      | 8373                | 963                   | 495               | 459               | 0.481       | NA              | NA                | NA            | NA            | NA      | 10009           | 890              | 878           | 11            | 0.012   | NA               | NA                 | NA             | NA             | NA       |
| 597501 | 19  | 17440815  | 17440815  | G         | A       | <i>ANO8</i>            | missense                    | c.1282          | p.R428W           | tier1 | 18125              | 2340                 | 2297             | 39               | 0.017      | 16282               | 1820                  | 1289              | 504               | 0.281       | NA              | NA                | NA            | NA            | NA      | 33601           | 3412             | 3379          | 21            | 0.006   | NA               | NA                 | NA             | NA             | NA       |
| 597501 | 19  | 47884624  | 47884624  | G         | A       | <i>DHX34</i>           | 3_prime_untranslated_region | c.*47884624     | NULL              | tier3 | 41418              | 5490                 | 5361             | 121              | 0.022      | 18930               | 2084                  | 1128              | 933               | 0.453       | NA              | NA                | NA            | NA            | NA      | 80784           | 5946             | 5873          | 58            | 0.010   | NA               | NA                 | NA             | NA             | NA       |
| 597501 | 19  | 54080590  | 54080590  | T         | C       | <i>ZNF331</i>          | missense                    | c.776           | p.I259T           | tier1 | 15559              | 1995                 | 1949             | 45               | 0.023      | 10394               | 1170                  | 652               | 505               | 0.364       | NA              | NA                | NA            | NA            | NA      | 28227           | 3026             | 2971          | 41            | 0.014   | NA               | NA                 | NA             | NA             | NA       |
| 597501 | 20  | 48098486  | 48098486  | G         | A       | <i>KCNB1</i>           | silent                      | c.532           | p.L178            | tier1 | 16072              | 2068                 | 1992             | 74               | 0.036      | 9762                | 1145                  | 590               | 542               | 0.479       | NA              | NA                | NA            | NA            | NA      | 27257           | 2577             | 2544          | 32            | 0.012   | NA               | NA                 | NA             | NA             | NA       |
| 597501 | X   | 10084387  | 10084387  | T         | C       | <i>WWC3</i>            | intronic                    | c.975-71        | e9-71             | tier3 | 32016              | 4112                 | 4011             | 99               | 0.024      | 16975               | 1721                  | 885               | 814               | 0.479       | NA              | NA                | NA            | NA            | NA      | 63246           | 5639             | 5578          | 56            | 0.010   | NA               | NA                 | NA             | NA             | NA       |
| 597501 | X   | 70357542  | 70357542  | C         | T       | <i>MED12</i>           | intronic                    | c.5836-34       | e41-34            | tier3 | 18298              | 2446                 | 2377             | 67               | 0.027      | 8295                | 924                   | 465               | 456               | 0.495       | NA              | NA                | NA            | NA            | NA      | 33528           | 2365             | 2337          | 25            | 0.011   | NA               | NA                 | NA             | NA             | NA       |
| 621996 | 1   | 4772000   | 4772000   | C         | A       | <i>AJAP1</i>           | missense                    | c.70            | p.H24N            | tier1 | 21542              | 2074                 | 2032             | 36               | 0.017      | 34011               | 3568                  | 2250              | 1270              | 0.361       | 28983           | 2915              | 1603          | 1275          | 0.443   | 33573           | 4104             | 4095          | 6             | 0.000   | 50278            | 6422               | 6415           | 1              | 0.000    |
| 621996 | 1   | 91404719  | 91404719  | T         | C       | <i>ZNF644</i>          | missense                    | c.2192          | p.N731S           | tier1 | 11123              | 990                  | 976              | 14               | 0.014      | 14226               | 1396                  | 851               | 528               | 0.383       | 15909           | 1537              | 861           | 657           | 0.433   | 20461           | 2305             | 2297          | 5             | 0.000   | 37025            | 5065               | 5060           | 4              | 0.000    |
| 621996 | 1   | 154841865 | 154841865 | G         | A       | <i>KCNM3</i>           | silent                      | c.576           | p.S192            | tier1 | 7417               | 724                  | 716              | 8                | 0.011      | 12115               | 1249                  | 834               | 398               | 0.323       | 12983           | 1394              | 808           | 569           | 0.413   | 11537           | 1270             | 1269          | 0             | 0.000   | 18414            | 2897               | 2896           | 0              | 0.000    |
| 621996 | 1   | 176769238 | 176769238 | C         | T       | <i>PAPPA2</i>          | silent                      | c.5172          | p.P1724           | tier1 | 9531               | 990                  | 970              | 20               | 0.020      | 10865               | 1175                  | 783               | 388               | 0.331       | 12110           | 1297              | 726           | 564           | 0.437   | 11017           | 1305             | 1305          | 0             | 0.000   | 22967            | 3292               | 3289           | 1              | 0.000    |
| 621996 | 2   | 98354060  | 98354060  | C         | T       | <i>ZAP70</i>           | missense                    | c.1414          | p.R472W           | tier1 | 12198              | 1552                 | 1550             | 0                | 0.000      | 25854               | 2879                  | 2392              | 465               | 0.163       | 26318           | 3171              | 2781          | 362           | 0.115   | 24275           | 2923             | 2916          | 1             | 0.000   | 49497            | 7446               | 7430           | 3              | 0.000    |
| 621996 | 2   | 166223736 | 166223736 | G         | A       | <i>SCN2A</i>           | missense                    | c.3530          | p.R1177Q          | tier1 | 98                 | 9                    | 9                | 0                | 0.000      | 127                 | 19                    | 12                | 7                 | 0.368       | 213             | 28                | 13            | 15            | 0.536   | 179             | 0                | 0             | 0             | 0.000   | 488              | 84                 | 84             | 0              | 0.000    |
| 621996 | 2   | 179604342 | 179604342 | C         | T       | <i>TTN</i>             | missense                    | c.13105         | p.V4369M          | tier1 | 6466               | 601                  | 596              | 4                | 0.007      | 6700                | 691                   | 437               | 250               | 0.364       | 8076            | 78                | 449           | 334           | 0.427   | 8898            | 1067             | 1065          | 1             | 0.000   | 12585            | 1891               | 1891           | 0              | 0.000    |
| 621996 | 2   | 197709191 | 197709191 | T         | C       | <i>PGAP1</i>           | intronic                    | c.2337+57       | e24+57            | tier3 | 1048               | 86                   | 83               | 3                | 0.035      | 1292                | 107                   | 56                | 51                | 0.477       | 1690            | 128               | 72            | 56            | 0.438   | 1301            | 127              | 126           | 1             | 0.000   | 3502             | 443                | 442            | 0              | 0.000    |
| 621996 | 3   | 38291377  | 38291377  | G         | A       | <i>OXSRI</i>           | intronic                    | c.1323-80       | e15-80            | tier3 | 3291               | 323                  | 321              | 2                | 0.006      | 3035                | 327                   | 226               | 100               | 0.307       | 3164            | 352               | 210           | 142           | 0.403   | 3956            | 441              | 441           | 0             | 0.000   | 6631             | 1199               | 1191           | 1              | 0.000    |
| 621996 | 3   | 50312255  | 50312255  | C         | G       | <i>SEMA3B</i>          | 3_prime_untranslated_region | c.*50312255     | NULL              | tier2 | 17760              | 2173                 | 2145             | 25               | 0.012      | 27636               | 3136                  | 2023              | 1079              | 0.348       | 27358           | 3188              | 1796          | 1328          | 0.425   | 28112           | 3621             | 3615          | 3             | 0.000   | 44541            | 7415               | 7398           | 3              | 0.000    |
| 621996 | 3   | 125879686 | 125879686 | G         | A       | <i>ALDH1L1</i>         | splice_region               | c.127+10        | e1+10             | tier3 | 57489              | 6208                 | 6190             | 4                | 0.001      | 50722               | 5652                  | 4444              | 1109              | 0.200       | 45533           | 4909              | 3578          | 1253          | 0.259   | 63552           | 8069             | 8058          | 0             | 0.000   | 91484            | 11615              | 11579          | 0              | 0.000    |
| 621996 | 4   | 125592366 | 125592366 | T         | G       | <i>ANKRD50</i>         | missense                    | c.2066          | p.H689P           | tier1 | 17618              | 2018                 | 1975             | 39               | 0.019      | 32256               | 3727                  | 2433              | 1239              | 0.337       | 41529           | 4967              | 2768          | 2091          | 0.430   | 35605           | 4752             | 4739          | 4             | 0.000   | 54131            | 8759               | 8755           | 2              | 0.000    |
| 621996 | 5   | 133483867 | 133483867 | T         | G       | <i>TCF7</i>            | 3_prime_untranslated_region | c.*1873         | NULL              | tier3 | 4571               | 424                  | 418              | 6                | 0.014      | 5018                | 472                   | 336               | 135               | 0.287       | 5461            | 504               | 317           | 184           | 0.367   | 5853            | 575              | 575           | 0             | 0.000   | 14536            | 0                  | 0              | 0              | 0.000    |
| 621996 | 5   | 154255096 | 154255096 | C         | A       | <i>CNOT8</i>           | 3_prime_untranslated_region | c.*97           | NULL              | tier3 | 15241              | 1862                 | 1844             | 17               | 0.009      | 18256               | 2288                  | 1498              | 768               | 0.339       | 17860           | 2200              | 1256          | 920           | 0.423   | 25501           | 3479             | 3477          | 1             | 0.000   | 49890            | 7806               |                |                |          |



| UPN    | Chr | Start     | Stop      | Reference | Variant | Gene Symbol     | Mutation Type               | Coding Position | Amino Acid Change | Tier  | Normal Total Count | Normal Unique Count* | Normal Ref Count | Normal Var Count | Normal VAF | Initial Total Count | Initial Unique Count* | Initial Ref Count | Initial Var Count | Initial VAF | Pre Total Count | Pre Unique Count* | Pre Ref Count | Pre Var Count | Pre VAF | D30 Total Count | D30 Unique Count* | D30 Ref Count | D30 Var Count | D30 VAF | D100 Total Count | D100 Unique Count* | D100 Ref Count | D100 Var Count | D100 VAF |
|--------|-----|-----------|-----------|-----------|---------|-----------------|-----------------------------|-----------------|-------------------|-------|--------------------|----------------------|------------------|------------------|------------|---------------------|-----------------------|-------------------|-------------------|-------------|-----------------|-------------------|---------------|---------------|---------|-----------------|-------------------|---------------|---------------|---------|------------------|--------------------|----------------|----------------|----------|
| 625338 | 21  | 36231782  | 36231782  | C         | T       | RUNX1           | missense                    | c.602           | p.R201Q           | tier1 | 27269              | 3823                 | 3818             | 2                | 0.001      | 15956               | 2090                  | 2041              | 42                | 0.020       | 13997           | 1319              | 1310          | 7             | 0.005   | 34911           | 5289              | 5285          | 3             | 0.000   | 93815            | 10945              | 10941          | 0              | 0.000    |
| 625338 | 21  | 36252865  | 36252865  | C         | T       | RUNX1           | missense                    | c.497           | p.R166Q           | tier1 | 27077              | 3350                 | 3349             | 1                | 0.000      | 11292               | 1186                  | 1152              | 30                | 0.025       | 12298           | 1138              | 1128          | 10            | 0.009   | 37453           | 5311              | 5307          | 0             | 0.000   | 42670            | 4903               | 4900           | 1              | 0.000    |
| 627844 | 2   | 10224073  | 10224073  | G         | A       | ENSG00000233502 | splice_site                 | c.165+1         | e1+1              | tier1 | 22088              | 2486                 | 2466             | 18               | 0.007      | 26382               | 3471                  | 2707              | 750               | 0.217       | 33344           | 4412              | 4396          | 16            | 0.004   | 56061           | 7553              | 7544          | 5             | 0.000   | 51131            | 6045               | 6040           | 0              | 0.000    |
| 627844 | 3   | 31674390  | 31674390  | A         | T       | STT3B           | intronic                    | c.2188-37       | e15-37            | tier3 | 5173               | 513                  | 509              | 3                | 0.006      | 7302                | 1335                  | 928               | 397               | 0.300       | 11962           | 1724              | 1720          | 4             | 0.002   | 15477           | 2362              | 2358          | 0             | 0.000   | 16990            | 2293               | 2291           | 0              | 0.000    |
| 627844 | 3   | 122432409 | 122432409 | A         | G       | PARP14          | missense                    | c.3758          | p.N1253S          | tier1 | 9170               | 972                  | 957              | 15               | 0.015      | 16600               | 2288                  | 1487              | 787               | 0.346       | 15323           | 1939              | 1929          | 10            | 0.005   | 23362           | 3068              | 3066          | 0             | 0.000   | 25468            | 3056               | 3054           | 0              | 0.000    |
| 627844 | 4   | 20530641  | 20530641  | G         | A       | SLIT2           | missense                    | c.1532          | p.R511H           | tier1 | 8277               | 901                  | 899              | 2                | 0.002      | 12327               | 1644                  | 1505              | 137               | 0.083       | 11470           | 1579              | 1579          | 0             | 0.000   | 21940           | 3005              | 3002          | 1             | 0.000   | 19508            | 2342               | 2337           | 2              | 0.000    |
| 627844 | 6   | 69795034  | 69795034  | C         | T       | BAI3            | intronic                    | c.2480+9104     | e15+9104          | tier3 | 6593               | 621                  | 611              | 8                | 0.013      | 25424               | 3258                  | 2092              | 1142              | 0.353       | 17212           | 1969              | 1953          | 14            | 0.007   | 22372           | 2603              | 2600          | 0             | 0.000   | 22841            | 2344               | 2339           | 0              | 0.000    |
| 627844 | 6   | 135515531 | 135515531 | G         | A       | MYB             | missense                    | c.881           | p.R294Q           | tier1 | 4308               | 415                  | 412              | 3                | 0.007      | 15388               | 1791                  | 1462              | 321               | 0.180       | 18041           | 2118              | 2100          | 16            | 0.008   | 30939           | 3838              | 3835          | 2             | 0.000   | 20305            | 1946               | 1941           | 1              | 0.000    |
| 627844 | 6   | 146719968 | 146719968 | C         | T       | GRM1            | missense                    | c.1793          | p.A598V           | tier1 | 5415               | 502                  | 499              | 3                | 0.006      | 14772               | 1879                  | 1298              | 566               | 0.304       | 12703           | 1475              | 1463          | 8             | 0.005   | 23733           | 2877              | 2876          | 0             | 0.000   | 23184            | 2557               | 2552           | 0              | 0.000    |
| 627844 | 7   | 27236580  | 27236580  | G         | A       | HOXA13          | 3_prime_untranslated_region | c.*1237         | NULL              | tier3 | 2953               | 190                  | 189              | 1                | 0.005      | 2439                | 250                   | 184               | 62                | 0.252       | 5482            | 560               | 557           | 0             | 0.000   | 7055            | 721               | 720           | 0             | 0.000   | 7531             | 554                | 553            | 0              | 0.000    |
| 627844 | 7   | 80303472  | 80303472  | G         | A       | CD36            | 3_prime_untranslated_region | c.*9            | NULL              | tier2 | 4025               | 247                  | 245              | 1                | 0.004      | 5162                | 620                   | 430               | 183               | 0.299       | 7630            | 735               | 726           | 8             | 0.011   | 10410           | 1042              | 1041          | 0             | 0.000   | 11879            | 1070               | 1068           | 0              | 0.000    |
| 627844 | 8   | 82373788  | 82373788  | G         | A       | FABP9           | 5_prime_untranslated_region | c.-30           | NULL              | tier3 | 22416              | 2311                 | 2288             | 19               | 0.008      | 39215               | 4843                  | 3315              | 1483              | 0.309       | 42733           | 5081              | 5062          | 15            | 0.003   | 71337           | 8935              | 8928          | 3             | 0.000   | 55364            | 5922               | 5917           | 1              | 0.000    |
| 627844 | 8   | 105503259 | 105503259 | C         | T       | LRP12           | missense                    | c.11375         | p.R722H           | tier1 | 11375              | 1292                 | 1280             | 10               | 0.008      | 16557               | 2232                  | 1585              | 624               | 0.282       | 17302           | 2239              | 2233          | 5             | 0.002   | 30729           | 4178              | 4175          | 1             | 0.000   | 23471            | 2850               | 2848           | 1              | 0.000    |
| 627844 | 11  | 73980724  | 73980724  | A         | G       | PAHA3           | silent                      | c.1440          | p.Y480            | tier1 | 25154              | 2444                 | 2418             | 25               | 0.010      | 39632               | 4778                  | 3157              | 1575              | 0.333       | 28032           | 3297              | 3273          | 19            | 0.006   | 59221           | 7211              | 7205          | 0             | 0.000   | 57035            | 5848               | 5845           | 0              | 0.000    |
| 627844 | 12  | 8186333   | 8186333   | G         | T       | FOXJ2           | 5_prime_untranslated_region | c.-6096         | NULL              | tier2 | 829                | 127                  | 126              | 1                | 0.008      | 5559                | 1185                  | 1094              | 89                | 0.075       | 5694            | 0                 | 0             | 0             | NA      | 7809            | 1517              | 1515          | 0             | 0.000   | 9569             | 1672               | 1672           | 0              | 0.000    |
| 627844 | 12  | 64841839  | 64841839  | A         | G       | XPOT            | intronic                    | c.2863-46       | e24-46            | tier3 | 6777               | 610                  | 606              | 3                | 0.005      | 20947               | 2609                  | 2349              | 240               | 0.093       | 17522           | 1979              | 1977          | 0             | 0.000   | 39917           | 4834              | 4832          | 0             | 0.000   | 32445            | 3249               | 3242           | 0              | 0.000    |
| 627844 | 12  | 112185009 | 112185009 | C         | T       | ACAD10          | 3_prime_untranslated_region | c.*112185009    | NULL              | tier3 | 5275               | 471                  | 470              | 1                | 0.002      | 8750                | 1314                  | 1085              | 220               | 0.169       | 9514            | 1207              | 1201          | 4             | 0.003   | 14527           | 1924              | 1922          | 0             | 0.000   | 18831            | 2384               | 2379           | 0              | 0.000    |
| 627844 | 12  | 112884192 | 112884192 | C         | T       | PTPN11          | missense                    | c.127           | p.L43F            | tier1 | 25136              | 2456                 | 2452             | 4                | 0.002      | 39423               | 5037                  | 4467              | 535               | 0.107       | 43769           | 5135              | 5133          | 0             | 0.000   | 65353           | 8100              | 8096          | 0             | 0.000   | 61427            | 6649               | 6646           | 0              | 0.000    |
| 627844 | 14  | 86088433  | 86088433  | T         | A       | FLRT2           | missense                    | c.575           | p.I192N           | tier1 | 25520              | 2429                 | 2421             | 7                | 0.003      | 38670               | 4755                  | 3908              | 796               | 0.169       | 29889           | 3437              | 3428          | 9             | 0.003   | 67453           | 8379              | 8369          | 0             | 0.000   | 53919            | 5524               | 5523           | 0              | 0.000    |
| 627844 | 15  | 75798204  | 75798204  | G         | C       | PTPN9           | silent                      | c.780           | p.P260            | tier1 | 15640              | 1769                 | 1760             | 9                | 0.005      | 20641               | 2706                  | 2528              | 169               | 0.063       | 18404           | 2319              | 2317          | 0             | 0.000   | 36426           | 4783              | 4780          | 0             | 0.000   | 31203            | 3567               | 3565           | 0              | 0.000    |
| 627844 | 16  | 47675018  | 47675018  | G         | A       | PHKB            | intronic                    | c.1514+17       | e15+17            | tier3 | 7847               | 741                  | 737              | 4                | 0.005      | 9527                | 1226                  | 973               | 247               | 0.202       | 14238           | 1601              | 1598          | 1             | 0.000   | 19727           | 2361              | 2360          | 0             | 0.000   | 17331            | 1744               | 1740           | 0              | 0.000    |
| 627844 | 16  | 89836214  | 89836214  | G         | C       | FANCA           | 3_prime_untranslated_region | c.*27           | NULL              | tier3 | 15798              | 1453                 | 1431             | 21               | 0.014      | 23007               | 3037                  | 2001              | 1011              | 0.336       | 26819           | 3434              | 3406          | 26            | 0.008   | 41923           | 5467              | 5465          | 0             | 0.000   | 37877            | 4168               | 4167           | 0              | 0.000    |
| 627844 | 17  | 9282009   | 9282009   | C         | G       | STX8            | intronic                    | c.542-39        | e7-39             | tier3 | 7514               | 853                  | 845              | 8                | 0.009      | 9564                | 1517                  | 1010              | 497               | 0.330       | 11850           | 1693              | 1682          | 8             | 0.005   | 18722           | 2862              | 2859          | 0             | 0.000   | 16798            | 2181               | 2177           | 1              | 0.000    |
| 627844 | 17  | 11622752  | 11622752  | G         | A       | DNAH9           | missense                    | c.5654          | p.R1885H          | tier1 | 9774               | 1127                 | 1115             | 11               | 0.010      | 16539               | 2497                  | 1641              | 840               | 0.339       | 8450            | 1159              | 1154          | 4             | 0.003   | 22633           | 3261              | 3259          | 1             | 0.000   | 25002            | 3404               | 3400           | 1              | 0.000    |
| 627844 | 18  | 61323095  | 61323095  | G         | A       | SERPINB3        | silent                      | c.969           | p.L323            | tier1 | 13174              | 1288                 | 1266             | 22               | 0.017      | 24056               | 3005                  | 2017              | 953               | 0.321       | 13982           | 1689              | 1677          | 11            | 0.007   | 34058           | 4209              | 4204          | 2             | 0.000   | 32700            | 3484               | 3481           | 3              | 0.000    |
| 627844 | 19  | 20045145  | 20045145  | G         | A       | ZNF93           | missense                    | c.1381          | p.A461T           | tier1 | 5354               | 481                  | 480              | 0                | 0.000      | 5729                | 724                   | 588               | 135               | 0.187       | 11047           | 1333              | 1327          | 6             | 0.005   | 15713           | 1998              | 1998          | 0             | 0.000   | 12317            | 1297               | 1295           | 1              | 0.000    |
| 627844 | X   | 13337504  | 13337504  | C         | T       | ATXN3           | missense                    | c.550           | p.E184K           | tier1 | 8492               | 885                  | 873              | 12               | 0.014      | 8287                | 1095                  | 501               | 588               | 0.540       | 12108           | 1497              | 1482          | 15            | 0.010   | 20652           | 2716              | 2710          | 2             | 0.000   | 17110            | 1885               | 1883           | 1              | 0.000    |
| 627844 | X   | 119387527 | 119387527 | A         | G       | ZBTB33          | missense                    | c.257           | p.Y86C            | tier1 | 4911               | 365                  | 358              | 7                | 0.019      | 9814                | 1168                  | 371               | 794               | 0.682       | 10059           | 1056              | 1037          | 19            | 0.018   | 17729           | 1941              | 1939          | 0             | 0.000   | 17129            | 1615               | 1613           | 0              | 0.000    |
| 635308 | 1   | 65307066  | 65307066  | C         | G       | JAK1            | intronic                    | c.2555-44       | e18-44            | tier3 | 7983               | 863                  | 861              | 0                | 0.000      | 4637                | 574                   | 515               | 57                | 0.100       | 2413            | 0                 | 0             | 0             | NA      | 1833            | 351               | 351           | 0             | 0.000   | 21               | 0                  | 0              | 0              | NA       |
| 635308 | 1   | 84394863  | 84394863  | T         | A       | TLL7            | silent                      | c.1098          | p.V366            | tier1 | 15865              | 1769                 | 1760             | 6                | 0.003      | 13655               | 1503                  | 1341              | 153               | 0.102       | 12523           | 1522              | 1520          | 0             | 0.000   | 48958           | 5596              | 5582          | 1             | 0.000   | 48044            | 5917               | 5914           | 0              | 0.000    |
| 635308 | 1   | 86591118  | 86591118  | C         | T       | COL24A1         | missense                    | c.901           | p.V301M           | tier1 | 346                | 60                   | 60               | 0                | 0.000      | 504                 | 81                    | 68                | 13                | 0.160       | 1111            | 191               | 183           | 7             | 0.037   | 348             | 88                | 86            | 2             | 0.000   | 277              | 0                  | 0              | 0              | NA       |
| 635308 | 1   | 222802593 | 222802593 | C         | T       | MIA3            | missense                    | c.778           | p.L260F           | tier1 | 1972               | 340                  | 337              | 3                | 0.009      | 4488                | 873                   | 730               | 137               | 0.158       | 4624            | 840               | 838           | 1             | 0.000   | 2106            | 476               | 471           | 3             | 0.006   | 436              | 39                 | 39             | 0              | 0.000    |
| 635308 | 3   | 112328837 | 112328837 | C         | T       | CCDC80          | missense                    | c.2413          | p.A805T           | tier1 | 13554              | 2190                 | 2177             | 12               | 0.005      | 20404               | 2878                  | 2524              | 343               | 0.120       | 16904           | 2791              | 2780          | 10            | 0.004   | 50090           | 6621              | 6605          | 7             | 0.000   | 56541            | 8126               | 8118           | 1              | 0.000    |
| 635308 | 3   | 131217024 | 131217024 | C         | G       | MRPL3           | missense                    | c.467           | p.R156P           | tier1 | 9976               | 1161                 | 1149             | 11               | 0.009      | 5937                | 698                   | 603               | 94                | 0.135       | 6987            | 938               | 934           | 1             | 0.000   |                 |                   |               |               |         |                  |                    |                |                |          |

| UPN    | Chr | Start     | Stop      | Reference | Variant | Gene Symbol     | Mutation Type               | Coding Position | Amino Acid Change | Tier  | Normal Total Count | Normal Unique Count* | Normal Ref Count | Normal Var Count | Normal VAF | Initial Total Count | Initial Unique Count* | Initial Ref Count | Initial Var Count | Initial VAF | Pre Total Count | Pre Unique Count* | Pre Ref Count | Pre Var Count | Pre VAF | D30 Total Count | D30 Unique Count* | D30 Ref Count | D30 Var Count | D30 VAF | D100 Total Count | D100 Unique Count* | D100 Ref Count | D100 Var Count | D100 VAF |
|--------|-----|-----------|-----------|-----------|---------|-----------------|-----------------------------|-----------------|-------------------|-------|--------------------|----------------------|------------------|------------------|------------|---------------------|-----------------------|-------------------|-------------------|-------------|-----------------|-------------------|---------------|---------------|---------|-----------------|-------------------|---------------|---------------|---------|------------------|--------------------|----------------|----------------|----------|
| 639691 | 2   | 89161003  | 89161003  | C         | G       | ENSG00000231486 | intronic                    | c.NULL          | NULL              | tier3 | 8446               | 830                  | 830              | 0                | 0.000      | 1049                | 105                   | 100               | 5                 | 0.048       | 5509            | 528               | 522           | 3             | 0.006   | 11048           | 1600              | 1588          | 8             | 0.005   | NA               | NA                 | NA             | NA             | NA       |
| 639691 | 2   | 89185292  | 89185292  | T         | C       | IGKV4-1         | intronic                    | c.50-64         | e2-64             | tier3 | 8501               | 799                  | 798              | 0                | 0.000      | 2038                | 245                   | 211               | 34                | 0.139       | 8231            | 787               | 704           | 80            | 0.102   | 12597           | 2121              | 2090          | 20            | 0.009   | NA               | NA                 | NA             | NA             | NA       |
| 639691 | 2   | 89246918  | 89246918  | G         | A       | IGKV1-5         | silent                      | c.252           | p.F84             | tier1 | 2318               | 284                  | 284              | 0                | 0.000      | 1207                | 194                   | 190               | 4                 | 0.021       | 3708            | 464               | 460           | 4             | 0.009   | 5344            | 1224              | 1220          | 4             | 0.003   | NA               | NA                 | NA             | NA             | NA       |
| 639691 | 2   | 89246947  | 89246947  | T         | G       | IGKV1-5         | missense                    | c.223           | p.S75R            | tier1 | 2294               | 284                  | 284              | 0                | 0.000      | 1194                | 193                   | 190               | 3                 | 0.016       | 3680            | 457               | 452           | 4             | 0.009   | 5349            | 1215              | 1211          | 4             | 0.003   | NA               | NA                 | NA             | NA             | NA       |
| 639691 | 2   | 89246969  | 89246969  | C         | G       | IGKV1-5         | missense                    | c.201           | p.K67N            | tier1 | 2338               | 290                  | 290              | 0                | 0.000      | 1207                | 197                   | 193               | 4                 | 0.020       | 3690            | 450               | 446           | 4             | 0.009   | 5462            | 1236              | 1232          | 4             | 0.003   | NA               | NA                 | NA             | NA             | NA       |
| 639691 | 2   | 89246970  | 89246970  | T         | C       | IGKV1-5         | missense                    | c.200           | p.K67R            | tier1 | 2316               | 283                  | 283              | 0                | 0.000      | 1191                | 194                   | 189               | 4                 | 0.021       | 3698            | 463               | 459           | 4             | 0.009   | 5377            | 1209              | 1205          | 3             | 0.002   | NA               | NA                 | NA             | NA             | NA       |
| 639691 | 2   | 89247181  | 89247181  | T         | G       | IGKV1-5         | intronic                    | c.55+59         | e1+59             | tier3 | 6057               | 494                  | 492              | 1                | 0.002      | 1359                | 163                   | 125               | 38                | 0.233       | 4642            | 326               | 265           | 60            | 0.185   | 1645            | 206               | 199           | 5             | 0.025   | NA               | NA                 | NA             | NA             | NA       |
| 639691 | 2   | 89247195  | 89247195  | T         | C       | IGKV1-5         | intronic                    | c.55+45         | e1+45             | tier3 | 5051               | 467                  | 466              | 1                | 0.002      | 1363                | 161                   | 122               | 38                | 0.238       | 4210            | 304               | 251           | 50            | 0.166   | 2805            | 214               | 209           | 5             | 0.023   | NA               | NA                 | NA             | NA             | NA       |
| 639691 | 2   | 89247280  | 89247280  | G         | T       | IGKV1-5         | silent                      | c.15            | p.V5              | tier1 | 4549               | 674                  | 673              | 1                | 0.001      | 1513                | 279                   | 194               | 85                | 0.305       | 3748            | 482               | 376           | 100           | 0.210   | 4527            | 1031              | 1009          | 21            | 0.020   | NA               | NA                 | NA             | NA             | NA       |
| 639691 | 2   | 202436665 | 202436665 | T         | G       | ALS2CR11        | missense                    | c.832           | p.T278P           | tier1 | 32477              | 3714                 | 3705             | 8                | 0.002      | 11831               | 1222                  | 874               | 330               | 0.274       | 37336           | 4115              | 3335          | 746           | 0.183   | 50275           | 7051              | 6874          | 139           | 0.020   | NA               | NA                 | NA             | NA             | NA       |
| 639691 | 3   | 38592896  | 38592896  | G         | A       | SCN5A           | missense                    | c.4967          | p.A1656V          | tier1 | 33890              | 3887                 | 3884             | 2                | 0.001      | 8817                | 826                   | 689               | 135               | 0.164       | 26746           | 2936              | 2472          | 453           | 0.155   | 30002           | 3942              | 2142          | 1781          | 0.454   | NA               | NA                 | NA             | NA             | NA       |
| 639691 | 3   | 193007798 | 193007798 | G         | C       | ATP13A5         | missense                    | c.2899          | p.Q967E           | tier1 | 6327               | 514                  | 511              | 3                | 0.006      | 2429                | 282                   | 258               | 22                | 0.079       | 8015            | 657               | 609           | 41            | 0.063   | 8252            | 1270              | 1251          | 8             | 0.006   | NA               | NA                 | NA             | NA             | NA       |
| 639691 | 4   | 100273911 | 100273911 | G         | T       | ADH1C           | 5_prime_untranslated_region | c.-79           | NULL              | tier3 | 6054               | 655                  | 650              | 1                | 0.002      | 1925                | 187                   | 150               | 37                | 0.198       | 6784            | 805               | 724           | 74            | 0.093   | 6972            | 1015              | 1005          | 8             | 0.008   | NA               | NA                 | NA             | NA             | NA       |
| 639691 | 4   | 189013998 | 189013998 | T         | C       | TRIML2          | 3_prime_untranslated_region | c.*4297         | NULL              | tier4 | 21908              | 3323                 | 3315             | 7                | 0.002      | 8212                | 1467                  | 1077              | 386               | 0.264       | 28026           | 4842              | 3885          | 926           | 0.192   | 34567           | 6431              | 6267          | 148           | 0.023   | NA               | NA                 | NA             | NA             | NA       |
| 639691 | 5   | 38968092  | 38968092  | G         | A       | RICTOR          | missense                    | c.1013          | p.P338L           | tier1 | 3780               | 382                  | 382              | 0                | 0.000      | 4111                | 433                   | 380               | 53                | 0.122       | 9735            | 1018              | 918           | 98            | 0.096   | 11334           | 1773              | 1309          | 461           | 0.260   | NA               | NA                 | NA             | NA             | NA       |
| 639691 | 6   | 15501389  | 15501389  | C         | T       | JARID2          | missense                    | c.2197          | p.R733C           | tier1 | 22037              | 2217                 | 2204             | 10               | 0.005      | 6584                | 650                   | 515               | 131               | 0.203       | 18952           | 1713              | 1468          | 232           | 0.136   | 28697           | 3919              | 3864          | 44            | 0.011   | NA               | NA                 | NA             | NA             | NA       |
| 639691 | 6   | 76343330  | 76343330  | T         | C       | SENP6           | missense                    | c.241           | p.S81P            | tier1 | 17217              | 1940                 | 1936             | 3                | 0.002      | 4979                | 449                   | 371               | 78                | 0.174       | 17536           | 2009              | 1704          | 295           | 0.148   | 18203           | 2527              | 1381          | 1125          | 0.449   | NA               | NA                 | NA             | NA             | NA       |
| 639691 | 6   | 119285878 | 119285878 | A         | C       | FAM184A         | missense                    | c.3092          | p.V1031G          | tier1 | 12696              | 1711                 | 1706             | 5                | 0.003      | 4883                | 643                   | 430               | 211               | 0.329       | 15829           | 2182              | 1756          | 420           | 0.193   | 19208           | 2880              | 2799          | 69            | 0.024   | NA               | NA                 | NA             | NA             | NA       |
| 639691 | 7   | 43484053  | 43484053  | C         | A       | HECW1           | missense                    | c.1282          | p.Q428K           | tier1 | 10580              | 1259                 | 1256             | 3                | 0.002      | 4591                | 606                   | 447               | 156               | 0.259       | 11798           | 1306              | 1015          | 274           | 0.213   | 17024           | 2995              | 2914          | 71            | 0.024   | NA               | NA                 | NA             | NA             | NA       |
| 639691 | 8   | 26628125  | 26628125  | G         | A       | ADRA1A          | silent                      | c.942           | p.L314            | tier1 | 17986              | 1926                 | 1923             | 1                | 0.001      | 4704                | 519                   | 415               | 103               | 0.199       | 14964           | 1610              | 1385          | 209           | 0.131   | 19764           | 3136              | 3080          | 50            | 0.016   | NA               | NA                 | NA             | NA             | NA       |
| 639691 | 8   | 40012484  | 40012484  | A         | C       | C8orf4          | 3_prime_untranslated_region | c.*1112         | NULL              | tier2 | 8452               | 738                  | 734              | 4                | 0.005      | 3364                | 306                   | 233               | 72                | 0.236       | 8709            | 710               | 563           | 142           | 0.201   | 7132            | 901               | 882           | 19            | 0.021   | NA               | NA                 | NA             | NA             | NA       |
| 639691 | 8   | 145745801 | 145745801 | A         | C       | LRRC14          | missense                    | c.509           | p.D170A           | tier1 | 11508              | 1199                 | 1198             | 0                | 0.000      | 9150                | 1010                  | 694               | 303               | 0.304       | 22730           | 2195              | 1756          | 418           | 0.192   | 34910           | 5021              | 4844          | 126           | 0.025   | NA               | NA                 | NA             | NA             | NA       |
| 639691 | 9   | 13217161  | 13217161  | C         | T       | MPD3            | intronic                    | c.1201+18       | e8+18             | tier3 | 886                | 64                   | 63               | 1                | 0.016      | 1466                | 138                   | 102               | 35                | 0.255       | 3896            | 246               | 190           | 55            | 0.224   | 3612            | 459               | 445           | 10            | 0.022   | NA               | NA                 | NA             | NA             | NA       |
| 639691 | 10  | 124458903 | 124458903 | C         | A       | C10orf120       | missense                    | c.202           | p.D68Y            | tier1 | 5489               | 713                  | 712              | 1                | 0.001      | 2839                | 306                   | 232               | 73                | 0.239       | 9234            | 875               | 707           | 162           | 0.186   | 12332           | 1871              | 1824          | 37            | 0.020   | NA               | NA                 | NA             | NA             | NA       |
| 639691 | 11  | 6235593   | 6235593   | T         | C       | FAM160A2        | intronic                    | c.2599+48       | e10+48            | tier3 | 9267               | 1190                 | 1187             | 3                | 0.003      | 6103                | 689                   | 561               | 125               | 0.182       | 11311           | 2560              | 2215          | 335           | 0.131   | 22491           | 3358              | 1809          | 1522          | 0.457   | NA               | NA                 | NA             | NA             | NA       |
| 639691 | 11  | 64794980  | 64794980  | C         | T       | SNX15           | 5_prime_untranslated_region | c.-30           | NULL              | tier2 | 2830               | 244                  | 243              | 1                | 0.004      | 1687                | 163                   | 131               | 32                | 0.196       | 4498            | 431               | 353           | 75            | 0.175   | 6750            | 943               | 512           | 427           | 0.455   | NA               | NA                 | NA             | NA             | NA       |
| 639691 | 12  | 70349145  | 70349145  | C         | G       | MYRFL           | missense                    | c.473           | p.S158C           | tier1 | 9660               | 807                  | 805              | 2                | 0.002      | 3563                | 294                   | 217               | 76                | 0.259       | 11360           | 926               | 733           | 184           | 0.201   | 9256            | 1098              | 1063          | 34            | 0.031   | NA               | NA                 | NA             | NA             | NA       |
| 639691 | 12  | 93477504  | 93477504  | C         | A       | ENSG00000257322 | intronic                    | c.NULL          | NULL              | tier4 | 5468               | 462                  | 461              | 1                | 0.002      | 2282                | 274                   | 227               | 45                | 0.165       | 7489            | 642               | 551           | 85            | 0.134   | 9608            | 1541              | 910           | 617           | 0.404   | NA               | NA                 | NA             | NA             | NA       |
| 639691 | 13  | 31002525  | 31002525  | G         | A       | UBE2L5P         | 3_prime_untranslated_region | c.*31002525     | NULL              | tier2 | 201                | 0                    | 0                | 0                | 0.000      | 208                 | 38                    | 29                | 9                 | 0.237       | 574             | 34                | 28            | 6             | 0.176   | 809             | 132               | 86            | 46            | 0.348   | NA               | NA                 | NA             | NA             | NA       |
| 639691 | 14  | 20264803  | 20264803  | G         | A       | ORAN1P          | 3_prime_untranslated_region | c.*20264803     | NULL              | tier3 | 9350               | 883                  | 877              | 5                | 0.006      | 2503                | 276                   | 215               | 61                | 0.221       | 8833            | 796               | 689           | 104           | 0.131   | 10978           | 1506              | 1474          | 28            | 0.019   | NA               | NA                 | NA             | NA             | NA       |
| 639691 | 14  | 77844469  | 77844469  | C         | A       | SAMD15          | silent                      | c.708           | p.T236            | tier1 | 5020               | 647                  | 645              | 1                | 0.002      | 5474                | 651                   | 530               | 118               | 0.182       | 16249           | 1728              | 1451          | 262           | 0.153   | 19603           | 3242              | 1742          | 1479          | 0.459   | NA               | NA                 | NA             | NA             | NA       |
| 639691 | 14  | 106329350 | 106329350 | C         | G       | ENSG00000244620 | 5_prime_flanking_region     | c.-26592        | NULL              | tier2 | 25170              | 2749                 | 2742             | 7                | 0.003      | 6776                | 587                   | 415               | 170               | 0.291       | 21423           | 2265              | 1790          | 455           | 0.203   | 27279           | 3490              | 3384          | 103           | 0.030   | NA               | NA                 | NA             | NA             | NA       |
| 639691 | 14  | 106329945 | 106329945 | C         | T       | ENSG00000244620 | 5_prime_flanking_region     | c.-25997        | NULL              | tier3 | 7418               | 582                  | 580              | 1                | 0.002      | 1641                | 167                   | 92                | 75                | 0.449       | 4990            | 365               | 278           | 84            | 0.232   | 9883            | 1275              | 1230          | 34            | 0.027   | NA               | NA                 | NA             | NA             | NA       |
| 639691 | 14  | 106329978 | 106329978 | C         | G       | ENSG00000244620 | 5_prime_flanking_region     | c.-25964        | NULL              | tier3 | 7435               | 580                  | 579              | 1                | 0.002      | 1712                | 167                   | 89                | 78                | 0.467       | 4999            | 363               | 276           | 84            | 0.233   | 10057           | 1265              | 1230          | 32            | 0.025   | NA               | NA                 | NA             | NA             | NA       |
| 639691 | 14  | 106330001 | 106330001 | G         | C       | ENSG00000244620 | 5_prime_flanking_region     | c.-25941        | NULL              | tier3 | 7354               | 584                  | 582              | 1                | 0.002      | 1678                | 168                   | 90                | 78                | 0.464       | 4936            | 366               | 277           | 87            | 0.239   | 9901            | 1278              | 1242          | 33            | 0.026   | NA               | NA                 | NA             | NA             | NA       |
| 639691 | 14  | 107034793 |           |           |         |                 |                             |                 |                   |       |                    |                      |                  |                  |            |                     |                       |                   |                   |             |                 |                   |               |               |         |                 |                   |               |               |         |                  |                    |                |                |          |

| UPN    | Chr | Start     | Stop      | Reference | Variant | Gene Symbol  | Mutation Type               | Coding Position | Amino Acid Change | Tier  | Normal Total Count | Normal Unique Count* | Normal Ref Count | Normal Var Count | Normal VAF | Initial Total Count | Initial Unique Count* | Initial Ref Count | Initial Var Count | Initial VAF | Pre Total Count | Pre Unique Count* | Pre Ref Count | Pre Var Count | Pre VAF | D30 Total Count | D30 Unique Count* | D30 Ref Count | D30 Var Count | D30 VAF | D100 Total Count | D100 Unique Count* | D100 Ref Count | D100 Var Count | D100 VAF |
|--------|-----|-----------|-----------|-----------|---------|--------------|-----------------------------|-----------------|-------------------|-------|--------------------|----------------------|------------------|------------------|------------|---------------------|-----------------------|-------------------|-------------------|-------------|-----------------|-------------------|---------------|---------------|---------|-----------------|-------------------|---------------|---------------|---------|------------------|--------------------|----------------|----------------|----------|
| 678913 | 16  | 5040788   | 5040788   | C         | T       | SEC14L5      | silent                      | c.366           | p.D122            | tier1 | 16442              | 1859                 | 1829             | 29               | 0.016      | 19631               | 2677                  | 1469              | 1174              | 0.444       | NA              | NA                | NA            | NA            | NA      | 34069           | 5025              | 5010          | 11            | 0.002   | 45945            | 7001               | 6985           | 10             | 0.001    |
| 678913 | 20  | 30618789  | 30618789  | C         | T       | LOC101929636 | rna                         | NULL            | NULL              | tier1 | 17783              | 2184                 | 2152             | 29               | 0.013      | 13197               | 1712                  | 1032              | 664               | 0.392       | NA              | NA                | NA            | NA            | NA      | 32513           | 3978              | 3968          | 6             | 0.002   | 36871            | 5220               | 5211           | 5              | 0.000    |
| 678913 | 21  | 27542825  | 27542825  | G         | C       | APP          | intronic                    | c.57+57         | e1+57             | tier2 | 13118              | 1435                 | 1410             | 24               | 0.017      | 9791                | 1054                  | 590               | 454               | 0.435       | NA              | NA                | NA            | NA            | NA      | 7400            | 923               | 918           | 3             | 0.003   | 21146            | 2738               | 2731           | 4              | 0.001    |
| 715413 | 1   | 201781078 | 201781078 | A         | C       | NAV1         | missense                    | c.5000          | p.N1667T          | tier1 | 4255               | 598                  | 597              | 0                | 0.000      | 7661                | 1306                  | 1248              | 54                | 0.041       | NA              | NA                | NA            | NA            | NA      | 24275           | 3980              | 3971          | 0             | 0.000   | 12702            | 701                | 698            | 0              | 0.000    |
| 715413 | 6   | 75851871  | 75851871  | C         | A       | COL12A1      | missense                    | c.4834          | p.V1612L          | tier1 | 6174               | 808                  | 805              | 2                | 0.002      | 6843                | 883                   | 834               | 47                | 0.053       | NA              | NA                | NA            | NA            | NA      | 22345           | 3156              | 3154          | 0             | 0.000   | 13555            | 735                | 734            | 1              | 0.000    |
| 715413 | 20  | 29612347  | 29612347  | C         | A       | FRG1B        | rna                         | NULL            | NULL              | tier1 | 30952              | 3895                 | 3542             | 339              | 0.087      | 29846               | 3923                  | 3599              | 317               | 0.081       | NA              | NA                | NA            | NA            | NA      | 106519          | 11051             | 11043         | 6             | 0.000   | 17614            | 523                | 491            | 31             | 0.000    |
| 717045 | 1   | 47548156  | 47548156  | G         | A       | CYP4Z1       | intronic                    | c.492+23        | e4+23             | tier3 | 6888               | 1164                 | 1151             | 10               | 0.009      | 2447                | 334                   | 198               | 135               | 0.405       | NA              | NA                | NA            | NA            | NA      | 3749            | 37                | 37            | 0             | 0.000   | 2526             | 475                | 472            | 2              | 0.000    |
| 717045 | 1   | 200878061 | 200878061 | G         | A       | C1orf106     | missense                    | c.1033          | p.E345K           | tier1 | 9569               | 1547                 | 1527             | 15               | 0.010      | 4371                | 450                   | 302               | 144               | 0.323       | NA              | NA                | NA            | NA            | NA      | 13009           | 77                | 75            | 1             | 0.000   | 5912             | 879                | 872            | 5              | 0.006    |
| 717045 | 2   | 32666548  | 32666548  | T         | G       | BIRC6        | intronic                    | c.3944+18       | e17+18            | tier3 | 2230               | 340                  | 333              | 7                | 0.021      | 922                 | 124                   | 80                | 44                | 0.355       | NA              | NA                | NA            | NA            | NA      | 1367            | 14                | 14            | 0             | 0.000   | 1245             | 199                | 198            | 1              | 0.000    |
| 717045 | 2   | 179481333 | 179481333 | A         | T       | TTN          | nonsense                    | c.40481         | p.L13494*         | tier1 | 30653              | 4147                 | 4095             | 46               | 0.011      | 8277                | 788                   | 490               | 292               | 0.373       | NA              | NA                | NA            | NA            | NA      | 29213           | 144               | 143           | 0             | 0.000   | 17902            | 2359               | 2342           | 9              | 0.004    |
| 717045 | 2   | 198266834 | 198266834 | T         | C       | SF3B1        | missense                    | c.2098          | p.K700E           | tier1 | 25635              | 3423                 | 3343             | 71               | 0.021      | 5493                | 515                   | 309               | 199               | 0.392       | NA              | NA                | NA            | NA            | NA      | 35694           | 201               | 201           | 0             | 0.000   | 15687            | 1931               | 1919           | 11             | 0.006    |
| 717045 | 2   | 217280235 | 217280235 | T         | C       | SMARCA1      | missense                    | c.808           | p.Y270H           | tier1 | 3481               | 490                  | 479              | 11               | 0.022      | 2272                | 190                   | 150               | 40                | 0.211       | NA              | NA                | NA            | NA            | NA      | 6845            | 0                 | 0             | 0             | 0.000   | 7963             | 1112               | 1108           | 2              | 0.000    |
| 717045 | 3   | 71355167  | 71355167  | T         | C       | FOXO1        | intronic                    | c.1-6136        | e1-6136           | tier2 | 9490               | 1403                 | 1390             | 3                | 0.002      | 2813                | 374                   | 275               | 98                | 0.263       | NA              | NA                | NA            | NA            | NA      | 11332           | 58                | 58            | 0             | 0.000   | 6491             | 872                | 869            | 2              | 0.000    |
| 717045 | 4   | 25407313  | 25407313  | G         | A       | ANAPC4       | intronic                    | c.1320+69       | e17+69            | tier3 | 3267               | 547                  | 539              | 7                | 0.013      | 1934                | 290                   | 174               | 114               | 0.396       | NA              | NA                | NA            | NA            | NA      | 3579            | 0                 | 0             | 0             | 0.000   | 1149             | 230                | 228            | 2              | 0.000    |
| 717045 | 4   | 105393360 | 105393360 | C         | T       | CXXC4        | rna                         | NULL            | NULL              | tier1 | 1241               | 95                   | 95               | 0                | 0.000      | 675                 | 49                    | 31                | 18                | 0.367       | NA              | NA                | NA            | NA            | NA      | 1811            | 49                | 49            | 0             | 0.000   | 923              | 116                | 116            | 0              | 0.000    |
| 717045 | 6   | 129475728 | 129475728 | G         | A       | LAMA2        | missense                    | c.1106          | p.R369H           | tier1 | 19868              | 2525                 | 2480             | 42               | 0.017      | 4971                | 418                   | 277               | 139               | 0.334       | NA              | NA                | NA            | NA            | NA      | 20889           | 117               | 115           | 1             | 0.000   | 11026            | 1492               | 1486           | 4              | 0.003    |
| 717045 | 7   | 73973313  | 73973313  | G         | A       | GTF2IRD1     | missense                    | c.2275          | p.G759S           | tier1 | 3212               | 534                  | 524              | 9                | 0.017      | 2398                | 309                   | 216               | 90                | 0.294       | NA              | NA                | NA            | NA            | NA      | 2015            | 15                | 15            | 0             | 0.000   | 1155             | 199                | 197            | 1              | 0.000    |
| 717045 | 7   | 151878771 | 151878771 | T         | C       | KMT2C        | silent                      | c.6174          | p.G2058           | tier1 | 14778              | 2969                 | 2922             | 46               | 0.015      | 4446                | 667                   | 416               | 249               | 0.374       | NA              | NA                | NA            | NA            | NA      | 15495           | 133               | 133           | 0             | 0.000   | 3741             | 821                | 817            | 4              | 0.005    |
| 717045 | 8   | 9639151   | 9639151   | A         | G       | TNKS         | 3_prime_untranslated_region | c.*4905         | NULL              | tier3 | 1352               | 195                  | 193              | 2                | 0.010      | 1136                | 134                   | 79                | 54                | 0.406       | NA              | NA                | NA            | NA            | NA      | 1294            | 0                 | 0             | 0             | 0.000   | 878              | 130                | 129            | 1              | 0.000    |
| 717045 | 10  | 61666207  | 61666207  | G         | A       | CCDC6        | 5_prime_untranslated_region | c.-25           | NULL              | tier2 | 12004              | 1530                 | 1512             | 18               | 0.012      | 3647                | 342                   | 220               | 119               | 0.351       | NA              | NA                | NA            | NA            | NA      | 10798           | 73                | 73            | 0             | 0.000   | 6044             | 846                | 843            | 3              | 0.004    |
| 717045 | 10  | 71620368  | 71620368  | C         | T       | COL13A1      | intronic                    | c.365-11564     | e3-11564          | tier3 | 21700              | 2851                 | 2794             | 54               | 0.019      | 6809                | 636                   | 400               | 234               | 0.369       | NA              | NA                | NA            | NA            | NA      | 29706           | 154               | 154           | 0             | 0.000   | 10151            | 1246               | 1240           | 5              | 0.004    |
| 717045 | 12  | 49724201  | 49724201  | G         | A       | TROAP        | missense                    | c.1573          | p.A525T           | tier1 | 11571              | 1517                 | 1495             | 17               | 0.011      | 3004                | 289                   | 205               | 83                | 0.288       | NA              | NA                | NA            | NA            | NA      | 10363           | 0                 | 0             | 0             | 0.000   | 6945             | 886                | 879            | 4              | 0.005    |
| 717045 | 14  | 88945999  | 88945999  | G         | A       | PTPN21       | silent                      | c.1776          | p.P592            | tier1 | 9582               | 1363                 | 1342             | 16               | 0.012      | 3009                | 377                   | 241               | 126               | 0.343       | NA              | NA                | NA            | NA            | NA      | 6962            | 79                | 79            | 0             | 0.000   | 2622             | 451                | 449            | 2              | 0.000    |
| 717045 | 15  | 101432730 | 101432730 | G         | C       | ALDH1A3      | missense                    | c.361           | p.D121H           | tier1 | 18641              | 2775                 | 2740             | 30               | 0.011      | 4893                | 555                   | 413               | 134               | 0.245       | NA              | NA                | NA            | NA            | NA      | 19272           | 102               | 102           | 0             | 0.000   | 7718             | 1098               | 1096           | 2              | 0.000    |
| 717045 | 16  | 66432084  | 66432084  | G         | T       | CDH5         | intronic                    | c.1485+75       | e8+75             | tier3 | 18545              | 2425                 | 2406             | 17               | 0.007      | 4073                | 376                   | 275               | 98                | 0.263       | NA              | NA                | NA            | NA            | NA      | 23912           | 112               | 112           | 0             | 0.000   | 10567            | 1319               | 1315           | 4              | 0.003    |
| 717045 | 17  | 40731892  | 40731892  | C         | T       | FAM134C      | 3_prime_untranslated_region | c.*1939         | NULL              | tier3 | 5159               | 1170                 | 1152             | 18               | 0.015      | 2301                | 331                   | 199               | 131               | 0.397       | NA              | NA                | NA            | NA            | NA      | 2789            | 36                | 36            | 0             | 0.000   | 1440             | 356                | 352            | 3              | 0.008    |
| 717045 | 19  | 1046259   | 1046259   | C         | G       | ABCA7        | silent                      | c.1476          | p.P492            | tier1 | 18745              | 2445                 | 2423             | 20               | 0.008      | 4267                | 409                   | 264               | 142               | 0.350       | NA              | NA                | NA            | NA            | NA      | 21192           | 99                | 99            | 0             | 0.000   | 8651             | 1076               | 1075           | 1              | 0.000    |
| 717045 | 20  | 39992390  | 39992390  | C         | T       | EMILIN3      | silent                      | c.402           | p.T134            | tier1 | 17366              | 3269                 | 3215             | 47               | 0.014      | 3282                | 810                   | 510               | 300               | 0.370       | NA              | NA                | NA            | NA            | NA      | 13665           | 0                 | 0             | 0             | 0.000   | 3847             | 744                | 741            | 1              | 0.000    |
| 732217 | 1   | 1896486   | 1896486   | G         | A       | C1orf222     | silent                      | c.171           | p.D57             | tier1 | 9674               | 1101                 | 1083             | 18               | 0.016      | 26093               | 3330                  | 1866              | 1416              | 0.431       | 28888           | 3230              | 1802          | 1367          | 0.431   | 23324           | 2863              | 2855          | 3             | 0.001   | NA               | NA                 | NA             | NA             | NA       |
| 732217 | 1   | 19549161  | 19549161  | C         | T       | EMC1         | missense                    | c.95            | p.R32K            | tier1 | 8174               | 922                  | 907              | 13               | 0.014      | 14888               | 1744                  | 908               | 819               | 0.474       | 16817           | 1911              | 958           | 1367          | 0.431   | 12097           | 1311              | 1308          | 2             | 0.000   | NA               | NA                 | NA             | NA             | NA       |
| 732217 | 1   | 20518895  | 20518895  | C         | T       | UBXN10       | 3_prime_untranslated_region | c.*998          | NULL              | tier3 | 1142               | 137                  | 135              | 2                | 0.015      | 5710                | 700                   | 392               | 307               | 0.439       | 6232            | 785               | 412           | 368           | 0.472   | 5373            | 633               | 633           | 0             | 0.000   | NA               | NA                 | NA             | NA             | NA       |
| 732217 | 1   | 46079781  | 46079781  | A         | G       | NASP         | missense                    | c.1526          | p.N509S           | tier1 | 4624               | 421                  | 415              | 6                | 0.014      | 7233                | 644                   | 316               | 323               | 0.505       | 7093            | 528               | 242           | 280           | 0.536   | 7638            | 680               | 678           | 1             | 0.000   | NA               | NA                 | NA             | NA             | NA       |
| 732217 | 2   | 112588927 | 112588927 | C         | G       | ANAPC1       | missense                    | c.2561          | p.G854A           | tier1 | 604                | 50                   | 46               | 3                | 0.061      | 984                 | 146                   | 87                | 56                | 0.392       | 1153            | 102               | 54            | 48            | 0.471   | 635             | 78                | 78            | 0             | 0.000   | NA               | NA                 | NA             | NA             | NA       |
| 732217 | 2   | 236949476 | 236949476 | G         | A       | AGAP1        | missense                    | c.1882          | p.E628K           | tier1 | 18761              | 2182                 | 2164             | 13               | 0.006      | 18854               | 2432                  | 1563              | 840               | 0.350       | 18896           | 2091              | 1336          | 718           | 0.350   | 15653           | 1820              | 1819          | 0             | 0.000   | NA               | NA                 | NA             | NA             | NA       |
| 732217 | 4   | 106164914 | 106164914 | G         | A       | TET2         | missense                    | c.3782          | p.R1261H          | tier1 | 5578               | 518                  | 493              | 24               | 0.046      | 5690                | 711                   | 73                | 626               | 0.896       | 6924            | 565               | 34            | 527           | 0.939   | 8545            | 826               | 822           | 2             | 0.000   | NA               | NA                 | NA             | NA             | NA       |
| 732217 | 4   | 125593542 | 125593542 | A         | G       | ANKRD50      | missense                    | c.890           | p.I297T           | tier1 | 961                | 92                   | 85               | 7                | 0.076      | 1571                |                       |                   |                   |             |                 |                   |               |               |         |                 |                   |               |               |         |                  |                    |                |                |          |



| UPN    | Chr | Start     | Stop      | Reference | Variant | Gene Symbol     | Mutation Type               | Coding Position | Amino Acid Change | Tier  | Normal Total Count | Normal Unique Count* | Normal Ref Count | Normal Var Count | Normal VAF | Initial Total Count | Initial Unique Count* | Initial Ref Count | Initial Var Count | Initial VAF | Pre Total Count | Pre Unique Count* | Pre Ref Count | Pre Var Count | Pre VAF | D30 Total Count | D30 Unique Count* | D30 Ref Count | D30 Var Count | D30 VAF | D100 Total Count | D100 Unique Count* | D100 Ref Count | D100 Var Count | D100 VAF |
|--------|-----|-----------|-----------|-----------|---------|-----------------|-----------------------------|-----------------|-------------------|-------|--------------------|----------------------|------------------|------------------|------------|---------------------|-----------------------|-------------------|-------------------|-------------|-----------------|-------------------|---------------|---------------|---------|-----------------|-------------------|---------------|---------------|---------|------------------|--------------------|----------------|----------------|----------|
| 754150 | 20  | 3127469   | 3127469   | C         | G       | FASTKD5         | missense                    | c.2248          | p.E750Q           | tier1 | 8547               | 944                  | 912              | 31               | 0.033      | 17344               | 2205                  | 1194              | 998               | 0.455       | 10908           | 1081              | 645           | 436           | 0.403   | 30850           | 3383              | 3354          | 27            | 0.008   | 16604            | 1874               | 1515           | 355            | 0.190    |
| 754150 | 20  | 29652147  | 29652147  | A         | G       | MLLT10P1        | 5_prime_flanking_region     | c.14087         | NULL              | tier4 | 41376              | 7127                 | 6538             | 527              | 0.075      | 18439               | 2659                  | 2479              | 170               | 0.064       | 20947           | 4228              | 3918          | 305           | 0.000   | 33089           | 4590              | 3963          | 585           | 0.129   | 2644             | 209                | 191            | 18             | 0.000    |
| 754150 | 20  | 55967777  | 55967777  | G         | C       | RBM38           | missense                    | c.305           | p.R102P           | tier1 | 15263              | 2080                 | 2043             | 32               | 0.015      | 30050               | 3990                  | 2450              | 1496              | 0.379       | 12918           | 1305              | 897           | 403           | 0.310   | 30621           | 3631              | 3624          | 3             | 0.001   | 25388            | 2858               | 2188           | 647            | 0.228    |
| 754150 | 22  | 50903351  | 50903351  | C         | T       | SBF1            | splice_region               | c.1333-5        | e13-5             | tier2 | 14749              | 2452                 | 2404             | 45               | 0.018      | 13321               | 2725                  | 1614              | 1079              | 0.401       | 4423            | 658               | 459           | 195           | 0.298   | 12482           | 1977              | 1961          | 15            | 0.008   | 6304             | 771                | 643            | 123            | 0.161    |
| 754150 | X   | 73064091  | 73064091  | A         | G       | XIST            | rna                         | NULL            | NULL              | tier1 | 8126               | 1021                 | 960              | 61               | 0.060      | 9415                | 1375                  | 133               | 1241              | 0.903       | 11277           | 1103              | 323           | 777           | 0.706   | 61253           | 7703              | 7657          | 44            | 0.006   | 21689            | 2666               | 2065           | 586            | 0.221    |
| 754150 | X   | 123505288 | 123505288 | T         | C       | SH2D1A          | rna                         | NULL            | NULL              | tier1 | 2972               | 378                  | 356              | 22               | 0.058      | 2096                | 333                   | 32                | 300               | 0.904       | 2654            | 494               | 138           | 355           | 0.720   | 4714            | 610               | 604           | 4             | 0.007   | 8943             | 1195               | 956            | 233            | 0.196    |
| 769516 | 1   | 116947126 | 116947126 | C         | G       | ATP1A1          | 3_prime_untranslated_region | c.*60           | NULL              | tier3 | 4379               | 903                  | 898              | 5                | 0.006      | 21673               | 3270                  | 2398              | 847               | 0.261       | NA              | NA                | NA            | NA            | NA      | 9447            | 1255              | 1247          | 5             | 0.004   | 3764             | 301                | 147,147;       | 7              | 0.023    |
| 769516 | 1   | 170927719 | 170927719 | G         | T       | MROH9           | intronic                    | c.152+38        | e3+38             | tier3 | 6124               | 916                  | 916              | 0                | 0.000      | 15862               | 2328                  | 2038              | 287               | 0.123       | NA              | NA                | NA            | NA            | NA      | 11442           | 1559              | 1555          | 2             | 0.000   | 10996            | 1518               | 1499,8;        | 8              | 0.005    |
| 769516 | 1   | 200943970 | 200943970 | G         | A       | KIF21B          | silent                      | c.4686          | p.S1562           | tier1 | 30045              | 4414                 | 4382             | 24               | 0.005      | 58382               | 8718                  | 6087              | 2524              | 0.293       | NA              | NA                | NA            | NA            | NA      | 27640           | 4100              | 4055          | 42            | 0.010   | 20505            | 2778               | 332,1934       | 208            | 0.075    |
| 769516 | 3   | 186288815 | 186288815 | A         | G       | DNAJB11         | intronic                    | c.68+61         | e1+61             | tier2 | 9068               | 1299                 | 86               | 9                | 0.095      | 18749               | 2517                  | 340               | 34                | 0.091       | NA              | NA                | NA            | NA            | NA      | 6400            | 879               | 197           | 3             | 0.000   | 1573             | 168                | 36,29;         | 0              | 0.000    |
| 769516 | 4   | 74361009  | 74361009  | C         | T       | AFM             | 3_prime_untranslated_region | c.*74361009     | NULL              | tier3 | 20688              | 2713                 | 2695             | 5                | 0.002      | 31126               | 3996                  | 3348              | 623               | 0.157       | NA              | NA                | NA            | NA            | NA      | 24465           | 3130              | 3113          | 16            | 0.005   | 21395            | 2757               | 325,139;       | 38             | 0.014    |
| 769516 | 4   | 187541903 | 187541903 | C         | T       | FAT1            | missense                    | c.5837          | p.S1946N          | tier1 | 18839              | 2348                 | 2344             | 4                | 0.002      | 31206               | 3969                  | 2813              | 1128              | 0.286       | NA              | NA                | NA            | NA            | NA      | 18065           | 2235              | 2228          | 5             | 0.002   | 12830            | 1496               | 0,1451;        | 40             | 0.027    |
| 769516 | 5   | 15936967  | 15936967  | C         | T       | FBX17           | missense                    | c.1148          | p.A383V           | tier1 | 45492              | 5016                 | 5001             | 14               | 0.003      | 111272              | 13453                 | 9607              | 3678              | 0.277       | NA              | NA                | NA            | NA            | NA      | 60333           | 7882              | 7841          | 34            | 0.004   | 40486            | 5549               | 429,201;       | 101            | 0.018    |
| 769516 | 5   | 73168759  | 73168759  | T         | A       | ARHGFE28        | intronic                    | c.2567-65       | e21-65            | tier3 | 3926               | 763                  | 760              | 2                | 0.003      | 12210               | 1939                  | 1383              | 544               | 0.282       | NA              | NA                | NA            | NA            | NA      | 6441            | 913               | 911           | 2             | 0.000   | 3970             | 344                | 72,262;        | 10             | 0.029    |
| 769516 | 9   | 100137897 | 100137897 | C         | G       | CCDC180         | 3_prime_untranslated_region | c.*100137897    | NULL              | tier3 | 26103              | 4043                 | 4026             | 7                | 0.002      | 69606               | 10464                 | 7499              | 2842              | 0.275       | NA              | NA                | NA            | NA            | NA      | 6046            | 6009              | 30            | 0.000         | 18833   | 2454             | 079,133;           | 42             | 0.017          |          |
| 769516 | 9   | 127549340 | 127549340 | C         | T       | OLFML2A         | silent                      | c.177           | p.D59             | tier1 | 11993              | 1888                 | 1881             | 6                | 0.003      | 26202               | 3916                  | 2880              | 1008              | 0.259       | NA              | NA                | NA            | NA            | NA      | 14504           | 2032              | 2027          | 4             | 0.002   | 8607             | 1160               | 481,645;       | 32             | 0.028    |
| 769516 | 13  | 32783001  | 32783001  | C         | T       | FRY             | nonsense                    | c.4030          | p.R1344*          | tier1 | 29902              | 3840                 | 3832             | 7                | 0.002      | 71199               | 9365                  | 6966              | 2291              | 0.247       | NA              | NA                | NA            | NA            | NA      | 31719           | 4091              | 4081          | 8             | 0.002   | 18021            | 2029               | 367,1618       | 41             | 0.020    |
| 769516 | 14  | 59113492  | 59113492  | C         | T       | DACT1           | silent                      | p.Y717          | tier1             | 27387 | 3265               | 3250                 | 12               | 0.004            | 60077      | 7305                | 5202                  | 2043              | 0.282             | NA          | NA              | NA                | NA            | NA            | 36538   | 4619            | 4600              | 16            | 0.003         | 12268   | 1544             | 1420,86;           | 37             | 0.024          |          |
| 769516 | 16  | 81208267  | 81208267  | A         | C       | PKD1L2          | missense                    | c.604           | p.C202G           | tier1 | 626                | 121                  | 119              | 2                | 0.017      | 5527                | 830                   | 583               | 243               | 0.294       | NA              | NA                | NA            | NA            | NA      | 1417            | 199               | 198           | 1             | 0.000   | 2                | 0                  | 0;             | 0              | NA       |
| 769516 | 17  | 71361450  | 71361450  | T         | C       | SDK2            | missense                    | c.5252          | p.N1751S          | tier1 | 13306              | 2032                 | 2026             | 5                | 0.002      | 25360               | 3981                  | 2888              | 1069              | 0.270       | NA              | NA                | NA            | NA            | NA      | 13517           | 2099              | 2089          | 7             | 0.003   | 6345             | 767                | 760,0;         | 7              | 0.009    |
| 769516 | 17  | 74732959  | 74732959  | G         | C       | SRSF2           | missense                    | c.284           | p.P95R            | tier1 | 13419              | 2024                 | 2016             | 5                | 0.002      | 31580               | 3381                  | 2412              | 946               | 0.282       | NA              | NA                | NA            | NA            | NA      | 17820           | 2431              | 2420          | 10            | 0.004   | 326              | 0                  | 0;             | 0              | NA       |
| 769516 | 18  | 14361468  | 14361468  | G         | A       | ENSG00000265437 | 5_prime_untranslated_region | c.-14361468     | NULL              | tier3 | 21053              | 3364                 | 3348             | 9                | 0.003      | 25555               | 4492                  | 3223              | 1233              | 0.277       | NA              | NA                | NA            | NA            | NA      | 9823            | 2009              | 2001          | 5             | 0.002   | 2823             | 282                | 49,225;        | 8              | 0.028    |
| 769516 | 22  | 19130308  | 19130308  | G         | A       | DGCR14          | missense                    | c.235           | p.R79W            | tier1 | 17674              | 2331                 | 2318             | 12               | 0.005      | 49652               | 6802                  | 4723              | 2011              | 0.299       | NA              | NA                | NA            | NA            | NA      | 15778           | 2169              | 2139          | 24            | 0.011   | 5436             | 687                | 218,408;       | 61             | 0.089    |
| 783437 | 6   | 102516350 | 102516350 | C         | T       | GRIK2           | silent                      | c.2691          | p.N897            | tier1 | 23399              | 3242                 | 3235             | 1                | 0.000      | 13388               | 1363                  | 1337              | 22                | 0.016       | 30048           | 3106              | 3065          | 34            | 0.011   | 29579           | 3249              | 3237          | 1             | 0.000   | NA               | NA                 | NA             | NA             | NA       |
| 783437 | 8   | 143369132 | 143369132 | G         | C       | TSNARE1         | intronic                    | c.1291-3286     | e10-3286          | tier3 | 17065              | 2199                 | 2194             | 3                | 0.001      | 7403                | 755                   | 735               | 20                | 0.026       | 5800            | 6062              | 671           | 11            | 0.016   | 5172            | 631               | 631           | 0             | 0.000   | NA               | NA                 | NA             | NA             | NA       |
| 796518 | 1   | 55611693  | 55611693  | C         | T       | USP24           | silent                      | c.1860          | p.E620            | tier1 | 2735               | 306                  | 305              | 0                | 0.000      | 2750                | 289                   | 208               | 78                | 0.273       | 4172            | 363               | 266           | 95            | 0.263   | 4630            | 544               | 544           | 0             | 0.000   | 4025             | 379                | 378            | 0              | 0.000    |
| 796518 | 2   | 98846643  | 98846643  | G         | A       | VWA3B           | missense                    | c.2281          | p.V761I           | tier1 | 3446               | 0                    | 0                | 0                | 0.000      | 3850                | 409                   | 336               | 72                | 0.176       | 3596            | 288               | 228           | 59            | 0.206   | 6741            | 798               | 796           | 0             | 0.000   | 6897             | 637                | 636            | 0              | 0.000    |
| 796518 | 2   | 171379066 | 171379066 | T         | C       | MYO3B           | intronic                    | c.3602+3016     | e30+3016          | tier3 | 11063              | 0                    | 0                | 0                | 0.000      | 12509               | 1466                  | 1031              | 421               | 0.290       | 14926           | 1522              | 1051          | 463           | 0.306   | 20224           | 2722              | 2718          | 1             | 0.000   | 20329            | 2141               | 2138           | 2              | 0.000    |
| 796518 | 2   | 179346878 | 179346878 | G         | A       | PLEKHA3         | intronic                    | c.40+1242       | e1+1242           | tier3 | 3836               | 642                  | 642              | 0                | 0.000      | 3467                | 500                   | 389               | 107               | 0.216       | 4079            | 512               | 423           | 88            | 0.172   | 6296            | 1174              | 1173          | 0             | 0.000   | 45262            | 659                | 659            | 0              | 0.000    |
| 796518 | 2   | 198266834 | 198266834 | T         | C       | SF3B1           | missense                    | c.2098          | p.K700E           | tier1 | 18394              | 2435                 | 2433             | 0                | 0.000      | 20454               | 2571                  | 2410              | 148               | 0.058       | 19730           | 2099              | 1959          | 136           | 0.065   | 30517           | 4012              | 4009          | 0             | 0.000   | 32569            | 4442               | 4432           | 0              | 0.000    |
| 796518 | 2   | 198267483 | 198267483 | C         | A       | SF3B1           | missense                    | c.1874          | p.R625L           | tier1 | 3722               | 520                  | 520              | 0                | 0.000      | 3949                | 538                   | 521               | 16                | 0.030       | 4192            | 362               | 359           | 2             | 0.000   | 7985            | 1218              | 1217          | 1             | 0.000   | 5274             | 635                | 635            | 0              | 0.000    |
| 796518 | 4   | 151682922 | 151682922 | T         | C       | LRBA            | intronic                    | c.5645+13       | e34+13            | tier4 | 674                | 0                    | 0                | 0                | 0.000      | 1457                | 161                   | 151               | 10                | 0.062       | 889             | 67                | 55            | 12            | 0.179   | 1728            | 185               | 185           | 0             | 0.000   | 1419             | 130                | 130            | 0              | 0.000    |
| 796518 | 4   | 155254236 | 155254236 | C         | T       | DCHS2           | missense                    | c.11627         | p.G543S           | tier1 | 11394              | 1883                 | 1880             | 3                | 0.002      | 13827               | 2246                  | 1646              | 579               | 0.260       | 10147           | 1138              | 827           | 296           | 0.264   | 20024           | 3577              | 3572          | 4             | 0.001   | 21124            | 3282               | 3280           | 0              | 0.000    |
| 796518 | 5   | 140202971 | 140202971 | C         | T       | PCDH45          | silent                      | c.1611          | p.R537            | tier1 | 1653               | 0                    | 0                | 0                | 0.000      | 655                 | 122                   | 53                | 69                | 0.566       | 601             | 70                | 35            | 35            | 0.500   | 1960            | 305               | 304           | 0             | 0.000   | 2503             | 394                | 394            | 0              | 0.000    |
| 796518 | 6   | 170591580 | 170591580 | G         | A       | DLL1            | 3_prime_untranslated_region | c.*382          | NULL              |       |                    |                      |                  |                  |            |                     |                       |                   |                   |             |                 |                   |               |               |         |                 |                   |               |               |         |                  |                    |                |                |          |

| UPN    | Chr | Start     | Stop      | Reference | Variant | Gene Symbol    | Mutation Type               | Coding Position | Amino Acid Change | Tier  | Normal Total Count | Normal Unique Count* | Normal Ref Count | Normal Var Count | Normal VAF | Initial Total Count | Initial Unique Count* | Initial Ref Count | Initial Var Count | Initial VAF | Pre Total Count | Pre Unique Count* | Pre Ref Count | Pre Var Count | Pre VAF | D30 Total Count | D30 Unique Count* | D30 Ref Count | D30 Var Count | D30 VAF | D100 Total Count | D100 Unique Count* | D100 Ref Count | D100 Var Count | D100 VAF |
|--------|-----|-----------|-----------|-----------|---------|----------------|-----------------------------|-----------------|-------------------|-------|--------------------|----------------------|------------------|------------------|------------|---------------------|-----------------------|-------------------|-------------------|-------------|-----------------|-------------------|---------------|---------------|---------|-----------------|-------------------|---------------|---------------|---------|------------------|--------------------|----------------|----------------|----------|
| 829970 | 15  | 58007312  | 58007312  | A         | T       | POLR2M         | 3_prime_untranslated_region | c.*435          | NULL              | tier3 | 17889              | 2733                 | 2733             | 0                | 0.000      | 24527               | 2393                  | 2007              | 376               | 0.158       | 10531           | 1419              | 1268          | 148           | 0.105   | 23746           | 2949              | 2946          | 0             | 0.000   | 37343            | 4007               | 4001           | 0              | 0.000    |
| 829970 | 16  | 72829450  | 72829450  | A         | G       | ZFXH3          | silent                      | c.7131          | p.P2377           | tier1 | 65842              | 8099                 | 8093             | 4                | 0.000      | 220053              | 6568                  | 3723              | 2801              | 0.429       | 39904           | 5153              | 2947          | 2181          | 0.425   | 274693          | 12266             | 12261         | 1             | 0.000   | 303829           | 12310              | 12307          | 0              | 0.000    |
| 829970 | 17  | 7577094   | 7577094   | G         | A       | TP53           | missense                    | c.844           | p.R282W           | tier1 | 42359              | 5489                 | 5479             | 7                | 0.001      | 99618               | 3652                  | 409               | 3224              | 0.887       | 19432           | 2511              | 601           | 1904          | 0.760   | 208625          | 11018             | 11002         | 4             | 0.000   | 243764           | 11574              | 11565          | 2              | 0.000    |
| 829970 | 19  | 17763404  | 17763404  | A         | T       | UNC13A         | intronic                    | c.1703+36       | e13+36            | tier3 | 24156              | 3848                 | 3844             | 3                | 0.001      | 143446              | 6046                  | 3217              | 2799              | 0.465       | 24442           | 3752              | 2115          | 1607          | 0.432   | 144133          | 9806              | 9796          | 2             | 0.000   | 158867           | 10029              | 10021          | 1              | 0.000    |
| 829970 | 19  | 18378165  | 18378165  | T         | G       | KIAA1683       | missense                    | c.185           | p.K62T            | tier1 | 60614              | 7436                 | 7432             | 1                | 0.000      | 351109              | 10301                 | 9767              | 504               | 0.049       | 24292           | 6159              | 5891          | 256           | 0.042   | 449565          | 17831             | 17829         | 0             | 0.000   | 430796           | 16176              | 16171          | 0              | 0.000    |
| 829970 | 19  | 39214520  | 39214520  | G         | C       | ACTN4          | intronic                    | c.1552-57       | e14-57            | tier3 | 18493              | 3153                 | 3143             | 5                | 0.002      | 47830               | 3698                  | 2035              | 1649              | 0.448       | 9229            | 1181              | 750           | 424           | 0.361   | 33152           | 4838              | 4813          | 2             | 0.000   | 63944            | 5988               | 5983           | 0              | 0.000    |
| 829970 | 19  | 53793213  | 53793213  | A         | T       | BIRC8          | missense                    | c.415           | p.S139T           | tier1 | 8821               | 1628                 | 1624             | 2                | 0.001      | 45234               | 5091                  | 2678              | 2380              | 0.471       | 6860            | 947               | 557           | 387           | 0.410   | 35152           | 5449              | 5446          | 0             | 0.000   | 35809            | 5161               | 5159           | 0              | 0.000    |
| 829970 | 20  | 30785389  | 30785389  | G         | C       | PLAGL2         | silent                      | c.357           | p.T119            | tier1 | 9332               | 1375                 | 1375             | 0                | 0.000      | 29576               | 1963                  | 1330              | 621               | 0.318       | 5178            | 699               | 508           | 190           | 0.272   | 41021           | 3266              | 3262          | 1             | 0.000   | 45205            | 3275               | 3273           | 0              | 0.000    |
| 829970 | 21  | 31655211  | 31655211  | C         | G       | KRTAP24-1      | missense                    | c.40            | p.V14L            | tier1 | 33433              | 4364                 | 4356             | 4                | 0.001      | 119572              | 6297                  | 3361              | 2884              | 0.462       | 25184           | 3378              | 2022          | 1344          | 0.399   | 147714          | 9761              | 9751          | 2             | 0.000   | 149189           | 9355               | 9351           | 2              | 0.000    |
| 829970 | 21  | 42694456  | 42694456  | G         | A       | FAM3B          | intronic                    | c.20-394        | e2-394            | tier4 | 14752              | 2300                 | 2298             | 2                | 0.001      | 61745               | 4709                  | 2938              | 1752              | 0.374       | 10902           | 1470              | 907           | 558           | 0.381   | 64284           | 7089              | 7086          | 1             | 0.000   | 67722            | 6909               | 6908           | 1              | 0.000    |
| 829970 | 21  | 45877697  | 45877697  | G         | A       | LRRC3          | 3_prime_untranslated_region | c.*396          | NULL              | tier3 | 63833              | 8705                 | 8704             | 1                | 0.000      | 232119              | 9581                  | 5287              | 4170              | 0.441       | 45194           | 6079              | 3512          | 2501          | 0.416   | 305112          | 15863             | 15856         | 0             | 0.000   | 368306           | 16212              | 16208          | 1              | 0.000    |
| 829970 | 22  | 33255649  | 33255649  | T         | C       | TIMP3          | 3_prime_untranslated_region | c.*285          | NULL              | tier3 | 8345               | 1083                 | 1082             | 1                | 0.001      | 15331               | 923                   | 561               | 360               | 0.391       | 6165            | 701               | 429           | 270           | 0.386   | 12831           | 0                 | 0             | 0             | 0.000   | 21898            | 1865               | 1865           | 0              | 0.000    |
| 839903 | 1   | 82436028  | 82436028  | C         | T       | LPHN2          | missense                    | c.2752          | p.H918Y           | tier1 | 16021              | 1977                 | 1975             | 2                | 0.001      | 10125               | 1338                  | 1077              | 254               | 0.191       | 14759           | 1912              | 1860          | 48            | 0.025   | 29834           | 2968              | 2967          | 0             | 0.000   | 35199            | 4572               | 4572           | 0              | 0.000    |
| 839903 | 1   | 115258747 | 115258747 | C         | T       | NRAS           | missense                    | c.35            | p.G12D            | tier1 | 13256              | 1591                 | 1589             | 1                | 0.001      | 21386               | 2683                  | 2358              | 310               | 0.116       | 19040           | 2396              | 2363          | 24            | 0.010   | 40180           | 4913              | 4910          | 1             | 0.000   | 56196            | 7343               | 7334           | 0              | 0.000    |
| 839903 | 1   | 177927426 | 177927426 | C         | T       | SEC16B         | missense                    | c.136           | p.A46T            | tier1 | 18951              | 2560                 | 2556             | 3                | 0.001      | 24301               | 3416                  | 1977              | 1587              | 0.349       | 24429           | 3372              | 3108          | 253           | 0.075   | 44549           | 5407              | 5404          | 0             | 0.000   | 44986            | 5858               | 5855           | 0              | 0.000    |
| 839903 | 1   | 222705451 | 222705451 | C         | A       | HHLPL2         | missense                    | c.1580          | p.R527L           | tier1 | 3662               | 401                  | 400              | 0                | 0.000      | 3425                | 403                   | 347               | 55                | 0.137       | 5921            | 715               | 702           | 13            | 0.018   | 10791           | 1308              | 1298          | 0             | 0.000   | 16444            | 2203               | 2203           | 0              | 0.000    |
| 839903 | 1   | 223568401 | 223568401 | G         | A       | C1orf65        | silent                      | c.1584          | p.K528            | tier1 | 14942              | 1917                 | 1912             | 4                | 0.002      | 23633               | 3360                  | 1928              | 1405              | 0.422       | 22610           | 3139              | 2936          | 197           | 0.063   | 42509           | 5373              | 5367          | 1             | 0.000   | 44194            | 5949               | 5946           | 0              | 0.000    |
| 839903 | 2   | 26677567  | 26677567  | G         | T       | DRC1           | missense                    | c.1972          | p.D658Y           | tier1 | 13984              | 1671                 | 1664             | 3                | 0.002      | 18947               | 2523                  | 1712              | 800               | 0.318       | 23621           | 3115              | 2989          | 124           | 0.040   | 43144           | 4466              | 4464          | 0             | 0.000   | 55025            | 7187               | 7186           | 0              | 0.000    |
| 839903 | 2   | 44203321  | 44203321  | G         | A       | LRPPRC         | missense                    | c.698           | p.A233V           | tier1 | 7918               | 841                  | 840              | 0                | 0.000      | 17347               | 2207                  | 1995              | 208               | 0.094       | 19424           | 2497              | 2470          | 25            | 0.010   | 35835           | 3621              | 3620          | 0             | 0.000   | 67422            | 8974               | 8969           | 0              | 0.000    |
| 839903 | 2   | 187367384 | 187367384 | G         | A       | ZC3H4          | intronic                    | c.534+70        | e5+70             | tier3 | 11850              | 1262                 | 1259             | 1                | 0.001      | 8032                | 932                   | 834               | 93                | 0.100       | 11241           | 1447              | 1343          | 2             | 0.000   | 17248           | 2132              | 2132          | 0             | 0.000   | 39208            | 5088               | 5087           | 0              | 0.000    |
| 839903 | 3   | 16217151  | 16217151  | G         | T       | GALNT15        | missense                    | c.493           | p.A165S           | tier1 | 12286              | 1808                 | 1798             | 5                | 0.003      | 16378               | 2137                  | 1187              | 929               | 0.439       | 20824           | 3448              | 3248          | 190           | 0.055   | 31150           | 3693              | 3690          | 0             | 0.000   | 34060            | 5234               | 5226           | 0              | 0.000    |
| 839903 | 3   | 57447266  | 57447266  | G         | A       | DNAH12         | nonsense                    | c.2617          | p.Q873*           | tier1 | 3954               | 451                  | 449              | 0                | 0.000      | 1921                | 222                   | 123               | 97                | 0.441       | 4228            | 548               | 508           | 35            | 0.064   | 3886            | 0                 | 0             | 0             | 0.000   | 20142            | 2610               | 2608           | 0              | 0.000    |
| 839903 | 3   | 78680237  | 78680237  | A         | G       | ROBO1          | missense                    | c.3626+74       | e24+74            | tier3 | 27223              | 3276                 | 3274             | 0                | 0.000      | 19918               | 2479                  | 2184              | 284               | 0.115       | 22538           | 2981              | 2942          | 36            | 0.012   | 41854           | 4224              | 4219          | 0             | 0.000   | 85366            | 10709              | 10701          | 0              | 0.000    |
| 839903 | 3   | 130317212 | 130317212 | G         | C       | COL6A6         | missense                    | c.4537          | p.A1513P          | tier1 | 321                | 45                   | 45               | 0                | 0.000      | 1549                | 237                   | 134               | 100               | 0.427       | 538             | 59                | 54            | 5             | 0.085   | 2842            | 697               | 697           | 0             | 0.000   | 2                | 0                  | 0              | 0              | 0.000    |
| 839903 | 4   | 145050305 | 145050305 | T         | A       | GYP A          | intronic                    | c.38-8564       | e2-8564           | tier3 | 533                | 0                    | 0                | 0                | 0.000      | 617                 | 90                    | 63                | 27                | 0.300       | 255             | 25                | 25            | 0             | 0.000   | 1781            | 411               | 411           | 0             | 0.000   | NA               | NA                 | NA             | NA             | NA       |
| 839903 | 5   | 101726657 | 101726657 | G         | A       | SLCO6A1        | intronic                    | c.1879+28       | e11+28            | tier3 | 1176               | 0                    | 0                | 0                | 0.000      | 4934                | 496                   | 286               | 207               | 0.420       | 4057            | 366               | 351           | 13            | 0.036   | 10569           | 1566              | 1560          | 0             | 0.000   | 7285             | 800                | 798            | 0              | 0.000    |
| 839903 | 5   | 131326603 | 131326603 | A         | G       | ACSL6          | missense                    | c.328           | p.Y110H           | tier1 | 6567               | 821                  | 814              | 0                | 0.000      | 16117               | 2125                  | 1190              | 912               | 0.434       | 22355           | 2975              | 2799          | 170           | 0.057   | 38415           | 4468              | 4456          | 0             | 0.000   | 32138            | 4528               | 4519           | 0              | 0.000    |
| 839903 | 5   | 140203552 | 140203552 | G         | T       | PCDH45         | missense                    | c.2192          | p.C731F           | tier1 | 8679               | 1086                 | 1080             | 1                | 0.001      | 9480                | 1388                  | 940               | 442               | 0.320       | 11864           | 1541              | 1484          | 55            | 0.036   | 21627           | 2771              | 2768          | 1             | 0.000   | 29412            | 3784               | 3782           | 0              | 0.000    |
| 839903 | 6   | 30229312  | 30229312  | G         | T       | HCG17          | intronic                    | c.NULL          | NULL              | tier3 | 831                | 125                  | 125              | 0                | 0.000      | 1417                | 249                   | 155               | 90                | 0.367       | 565             | 72                | 66            | 6             | 0.083   | 2257            | 521               | 521           | 0             | 0.000   | 3                | 0                  | 0              | 0              | 0.000    |
| 839903 | 7   | 151082221 | 151082221 | G         | A       | WDR86          | missense                    | c.815           | p.T272M           | tier1 | 5581               | 1014                 | 1012             | 2                | 0.002      | 10832               | 2225                  | 1875              | 340               | 0.154       | 7063            | 1288              | 1249          | 38            | 0.030   | 18522           | 3784              | 3781          | 0             | 0.000   | 3403             | 0                  | 0              | 0              | 0.000    |
| 839903 | 8   | 1649371   | 1649371   | G         | A       | DLGAP2         | missense                    | c.2735          | p.R912H           | tier1 | 14210              | 1645                 | 1641             | 4                | 0.002      | 21248               | 2891                  | 1546              | 1322              | 0.461       | 20485           | 2632              | 2432          | 193           | 0.074   | 38133           | 5051              | 5047          | 1             | 0.000   | 23433            | 3051               | 3048           | 1              | 0.000    |
| 839903 | 8   | 65496059  | 65496059  | C         | T       | BHLHE22        | 3_prime_untranslated_region | c.*1566         | NULL              | tier2 | 7201               | 772                  | 770              | 0                | 0.000      | 7932                | 936                   | 819               | 110               | 0.118       | 8762            | 1004              | 993           | 8             | 0.008   | 16563           | 2506              | 2500          | 2             | 0.000   | 30797            | 3990               | 3983           | 0              | 0.000    |
| 839903 | 9   | 32624147  | 32624147  | T         | A       | ENSG0000023440 | 5_prime_flanking_region     | c.-9305         | NULL              | tier4 | 10999              | 1258                 | 1253             | 0                | 0.000      | 6781                | 900                   | 747               | 150               | 0.167       | 12571           | 1608              | 1601          | 7             | 0.004   | 23472           | 2945              | 2944          | 0             | 0.000   | 47045            | 6174               | 6173           | 0              | 0.000    |
| 839903 | 10  | 5494360   | 5494360   | G         | A       | NET1           | missense                    | c.403           | p.A135T           | tier1 | 6161               | 947                  | 943              | 2                | 0.002      | 7354                | 1317                  | 705               | 602</             |             |                 |                   |               |               |         |                 |                   |               |               |         |                  |                    |                |                |          |

| UPN    | Chr | Start     | Stop      | Reference | Variant | Gene Symbol     | Mutation Type               | Coding Position | Amino Acid Change | Tier  | Normal Total Count | Normal Unique Count* | Normal Ref Count | Normal Var Count | Normal VAF | Initial Total Count | Initial Unique Count* | Initial Ref Count | Initial Var Count | Initial VAF | Pre Total Count | Pre Unique Count* | Pre Ref Count | Pre Var Count | Pre VAF | D30 Total Count | D30 Unique Count* | D30 Ref Count | D30 Var Count | D30 VAF | D100 Total Count | D100 Unique Count* | D100 Ref Count | D100 Var Count | D100 VAF |
|--------|-----|-----------|-----------|-----------|---------|-----------------|-----------------------------|-----------------|-------------------|-------|--------------------|----------------------|------------------|------------------|------------|---------------------|-----------------------|-------------------|-------------------|-------------|-----------------|-------------------|---------------|---------------|---------|-----------------|-------------------|---------------|---------------|---------|------------------|--------------------|----------------|----------------|----------|
| 848524 | 17  | 40666295  | 40666295  | C         | T       | MIRS010         | rna                         | NULL            | NULL              | tier1 | 15202              | 2089                 | 2024             | 64               | 0.031      | 8197                | 876                   | 487               | 387               | 0.443       | NA              | NA                | NA            | NA            | NA      | 53662           | 7044              | 7038          | 0             | 0.000   | 96862            | 11601              | 11587          | 0              | 0.000    |
| 848524 | 17  | 48594960  | 48594960  | C         | T       | MYCBPAP         | missense                    | c.422           | p.P141L           | tier1 | 1871               | 388                  | 386              | 2                | 0.005      | 1201                | 248                   | 165               | 81                | 0.329       | NA              | NA                | NA            | NA            | NA      | 3750            | 730               | 730           | 0             | 0.000   | 9                | 0                  | 0              | 0              | NA       |
| 848524 | 18  | 42531907  | 42531907  | G         | A       | SETBP1          | missense                    | c.2602          | p.D868N           | tier1 | 33806              | 4405                 | 4361             | 43               | 0.010      | 10538               | 1209                  | 878               | 327               | 0.271       | NA              | NA                | NA            | NA            | NA      | 60890           | 8051              | 8045          | 2             | 0.000   | 90832            | 9836               | 9825           | 2              | 0.000    |
| 848524 | 19  | 1043430   | 1043430   | C         | G       | ABCA7           | silent                      | c.888           | p.L296            | tier1 | 12979              | 1709                 | 1680             | 27               | 0.016      | 3119                | 331                   | 174               | 157               | 0.474       | NA              | NA                | NA            | NA            | NA      | 17315           | 2188              | 2187          | 0             | 0.000   | 12310            | 0                  | 0              | 0              | NA       |
| 848524 | 19  | 37064363  | 37064363  | A         | T       | LOC101927599    | rna                         | NULL            | NULL              | tier1 | 4280               | 554                  | 538              | 16               | 0.029      | 2810                | 339                   | 194               | 143               | 0.424       | NA              | NA                | NA            | NA            | NA      | 13995           | 1821              | 1819          | 0             | 0.000   | 39               | 0                  | 0              | 0              | NA       |
| 855934 | 1   | 228403429 | 228403429 | G         | A       | OBSO            | missense                    | c.1994          | p.R665Q           | tier1 | 22300              | 2989                 | 2893             | 94               | 0.031      | 24643               | 2799                  | 1434              | 1323              | 0.480       | 19684           | 2930              | 1552          | 1365          | 0.468   | 57126           | 5792              | 5784          | 2             | 0.000   | 82543            | 5668               | 5646           | 0              | 0.000    |
| 855934 | 2   | 81421390  | 81421390  | G         | A       | ENSG00000234429 | 3_prime_flanking_region     | c.*71           | NULL              | tier2 | 9501               | 1286                 | 1266             | 20               | 0.016      | 8989                | 1121                  | 583               | 530               | 0.476       | 5443            | 997               | 502           | 494           | 0.496   | 15179           | 2898              | 2896          | 1             | 0.000   | 21579            | 2130               | 2112           | 0              | 0.000    |
| 855934 | 2   | 166611398 | 166611398 | G         | T       | GALNT3          | intronic                    | c.1524+44       | e7+44             | tier3 | 3312               | 365                  | 363              | 0                | 0.000      | 1413                | 122                   | 100               | 22                | 0.180       | 2969            | 386               | 314           | 70            | 0.182   | 3645            | 0                 | 0             | 0             | NA      | 5340             | 544                | 539            | 0              | 0.000    |
| 855934 | 2   | 172231602 | 172231602 | C         | T       | ENSG00000224553 | 5_prime_untranslated_region | c.-172231602    | NULL              | tier3 | 7597               | 1034                 | 1034             | 0                | 0.000      | 8960                | 1103                  | 626               | 472               | 0.430       | 6232            | 947               | 517           | 430           | 0.454   | 20792           | 2574              | 2573          | 0             | 0.000   | 20542            | 1608               | 1589           | 0              | 0.000    |
| 855934 | 4   | 106157845 | 106157845 | C         | T       | TET2            | nonsense                    | c.2746          | p.Q916*           | tier1 | 5968               | 737                  | 736              | 1                | 0.001      | 8791                | 959                   | 682               | 274               | 0.287       | 4649            | 614               | 415           | 197           | 0.322   | 11492           | 1839              | 1839          | 0             | 0.000   | 11340            | 1010               | 1009           | 0              | 0.000    |
| 855934 | 5   | 140783754 | 140783754 | G         | A       | PCDHGA9         | missense                    | c.1235          | p.R412Q           | tier1 | 23881              | 2830                 | 2801             | 23               | 0.008      | 17004               | 1485                  | 873               | 598               | 0.407       | 22431           | 3092              | 1773          | 1307          | 0.424   | 41261           | 4457              | 4452          | 1             | 0.000   | 54408            | 4705               | 4655           | 0              | 0.000    |
| 855934 | 6   | 30530949  | 30530949  | C         | T       | PRR3            | rna                         | NULL            | NULL              | tier1 | 2715               | 383                  | 378              | 2                | 0.005      | 5694                | 610                   | 318               | 289               | 0.476       | 2764            | 446               | 246           | 200           | 0.448   | 10805           | 1511              | 1507          | 0             | 0.000   | 10715            | 964                | 960            | 0              | 0.000    |
| 855934 | 6   | 31637272  | 31637272  | C         | T       | CSNK2B          | nonsense                    | c.544           | p.Q182*           | tier1 | 28782              | 3963                 | 3955             | 3                | 0.001      | 32051               | 3923                  | 2086              | 1757              | 0.457       | 33542           | 4653              | 2378          | 2245          | 0.486   | 56317           | 6721              | 6709          | 0             | 0.000   | 96178            | 6943               | 6885           | 0              | 0.000    |
| 855934 | 7   | 6439714   | 6439714   | T         | C       | RAC1            | 3_prime_untranslated_region | c.*6439714      | NULL              | tier3 | 21570              | 2662                 | 2660             | 2                | 0.001      | 16783               | 1701                  | 1139              | 544               | 0.323       | 15399           | 2032              | 1576          | 448           | 0.221   | 50068           | 4599              | 4595          | 0             | 0.000   | 66552            | 4153               | 4147           | 0              | 0.000    |
| 855934 | 7   | 101758501 | 101758501 | C         | T       | CUX1            | nonsense                    | c.655           | p.R219*           | tier1 | 11794              | 1325                 | 1323             | 2                | 0.002      | 8454                | 716                   | 383               | 329               | 0.462       | 13207           | 1757              | 908           | 845           | 0.482   | 18061           | 2086              | 2085          | 1             | 0.000   | 30000            | 2631               | 2612           | 0              | 0.000    |
| 855934 | 8   | 139668092 | 139668092 | C         | T       | COL22A1         | intronic                    | c.3333+48       | e44+48            | tier3 | 4597               | 599                  | 594              | 4                | 0.007      | 5273                | 552                   | 299               | 250               | 0.455       | 2443            | 334               | 170           | 162           | 0.488   | 7959            | 1219              | 1217          | 1             | 0.000   | 11226            | 1202               | 1183           | 0              | 0.000    |
| 855934 | 8   | 145773426 | 145773426 | C         | T       | ARHGAP39        | silent                      | c.1044          | p.S348            | tier1 | 10243              | 1257                 | 1247             | 8                | 0.006      | 16542               | 1656                  | 772               | 866               | 0.529       | 12829           | 1766              | 917           | 844           | 0.479   | 35100           | 3956              | 3953          | 0             | 0.000   | 52895            | 4242               | 4215           | 0              | 0.000    |
| 855934 | 10  | 3183033   | 3183033   | A         | G       | PITRM1          | intronic                    | c.2649-29       | e24-29            | tier3 | 18710              | 2268                 | 2266             | 0                | 0.000      | 13126               | 1132                  | 741               | 422               | 0.363       | 20424           | 2819              | 1718          | 1094          | 0.389   | 35437           | 3868              | 3866          | 0             | 0.000   | 40465            | 3273               | 3270           | 0              | 0.000    |
| 855934 | 10  | 43651051  | 43651051  | A         | G       | CSGALNACT2      | missense                    | c.454           | p.T152A           | tier1 | 12655              | 1579                 | 1574             | 5                | 0.003      | 8911                | 947                   | 547               | 395               | 0.419       | 19417           | 2578              | 1530          | 1043          | 0.405   | 22682           | 2376              | 2372          | 0             | 0.000   | 29049            | 2253               | 2246           | 0              | 0.000    |
| 855934 | 10  | 71695049  | 71695049  | G         | A       | COL13A1         | intronic                    | c.1696-57       | e30-57            | tier3 | 24459              | 463                  | 460              | 2                | 0.004      | 5289                | 873                   | 489               | 377               | 0.435       | 1146            | 293               | 164           | 129           | 0.440   | 6555            | 1646              | 1643          | 0             | 0.000   | 5556             | 851                | 815            | 0              | 0.000    |
| 855934 | 10  | 104120904 | 104120904 | G         | A       | GBF1            | rna                         | NULL            | NULL              | tier1 | 17610              | 2163                 | 2106             | 2                | 0.001      | 17647               | 1664                  | 887               | 731               | 0.452       | 13624           | 1935              | 1031          | 888           | 0.463   | 32774           | 3721              | 3689          | 0             | 0.000   | 47533            | 3347               | 3160           | 0              | 0.000    |
| 855934 | 10  | 115528652 | 115528652 | G         | A       | PLEKHS1         | splice_region               | c.417+3         | e5+3              | tier2 | 10392              | 1388                 | 1377             | 11               | 0.008      | 10020               | 1043                  | 590               | 440               | 0.427       | 8026            | 1167              | 671           | 493           | 0.424   | 21668           | 2847              | 2844          | 0             | 0.000   | 20478            | 1772               | 1763           | 0              | 0.000    |
| 855934 | 12  | 54796846  | 54796846  | G         | A       | ITGA5           | 5_prime_untranslated_region | c.-54796846     | NULL              | tier3 | 13237              | 1766                 | 1753             | 10               | 0.006      | 21520               | 1436                  | 1280              | 1134              | 0.470       | 25246           | 3351              | 1777          | 1563          | 0.468   | 49193           | 4781              | 4777          | 1             | 0.000   | 87747            | 5500               | 5474           | 0              | 0.000    |
| 855934 | 12  | 70064230  | 70064230  | T         | G       | BEST3           | missense                    | c.590           | p.D197A           | tier1 | 5724               | 810                  | 802              | 8                | 0.010      | 7819                | 895                   | 479               | 412               | 0.462       | 5483            | 792               | 430           | 360           | 0.456   | 16909           | 2383              | 2379          | 0             | 0.000   | 28269            | 2139               | 2113           | 0              | 0.000    |
| 855934 | 16  | 84888372  | 84888372  | C         | T       | CRISPLD2        | missense                    | c.646           | p.R216W           | tier1 | 23506              | 3083                 | 3052             | 28               | 0.009      | 28205               | 3122                  | 1659              | 1411              | 0.460       | 31179           | 4347              | 2386          | 1941          | 0.449   | 64346           | 7136              | 7129          | 1             | 0.000   | 129438           | 10114              | 10073          | 0              | 0.000    |
| 855934 | 18  | 30253100  | 30253100  | C         | T       | KLHL14          | 3_prime_untranslated_region | c.*1520         | NULL              | tier2 | 2685               | 230                  | 226              | 3                | 0.013      | 2275                | 152                   | 82                | 70                | 0.461       | 2913            | 320               | 170           | 149           | 0.467   | 3991            | 582               | 580           | 0             | 0.000   | 3466             | 448                | 426            | 0              | 0.000    |
| 855934 | 19  | 43679576  | 43679576  | C         | T       | PSG5            | missense                    | c.755           | p.R252H           | tier1 | 1478               | 249                  | 246              | 2                | 0.008      | 4143                | 697                   | 389               | 303               | 0.438       | 669             | 168               | 83            | 84            | 0.503   | 5239            | 1286              | 1282          | 1             | 0.000   | 2985             | 492                | 482            | 0              | 0.000    |
| 855934 | 19  | 57772501  | 57772501  | C         | G       | ZNF460          | 5_prime_flanking_region     | c.-19674        | NULL              | tier3 | 13320              | 1487                 | 1414             | 69               | 0.047      | 15188               | 1320                  | 683               | 620               | 0.476       | 10949           | 1540              | 727           | 799           | 0.524   | 28212           | 3401              | 3399          | 0             | 0.000   | 22066            | 2146               | 2127           | 0              | 0.000    |
| 855934 | 20  | 49199177  | 49199177  | A         | C       | PTPN1           | intronic                    | c.1285-52       | e10-52            | tier3 | 7893               | 1359                 | 1320             | 35               | 0.026      | 7056                | 978                   | 491               | 479               | 0.494       | 4892            | 963               | 513           | 448           | 0.466   | 14097           | 2432              | 2430          | 0             | 0.000   | 15762            | 1949               | 1944           | 0              | 0.000    |
| 855934 | 21  | 44514777  | 44514777  | T         | G       | U2AF1           | missense                    | c.470           | p.Q157P           | tier1 | 43629              | 4878                 | 4825             | 47               | 0.010      | 37753               | 3682                  | 1883              | 1742              | 0.481       | 40446           | 5307              | 2738          | 2535          | 0.481   | 92104           | 7022              | 7020          | 0             | 0.000   | 136549           | 7411               | 7406           | 0              | 0.000    |
| 855934 | X   | 76888698  | 76888698  | G         | A       | ATRX            | missense                    | c.5131          | p.P1711S          | tier1 | 4150               | 513                  | 512              | 0                | 0.000      | 4019                | 394                   | 36                | 357               | 0.908       | 3741            | 542               | 29            | 513           | 0.946   | 8281            | 882               | 882           | 0             | 0.000   | 23645            | 1720               | 1700           | 0              | 0.000    |
| 856550 | 1   | 26317279  | 26317279  | G         | A       | PAFAH2          | missense                    | c.29            | p.P10L            | tier1 | 16035              | 281                  | 280              | 0                | 0.000      | 14052               | 1791                  | 1006              | 772               | 0.434       | NA              | NA                | NA            | NA            | NA      | 18225           | 2226              | 2205          | 20            | 0.009   | 26779            | 3401               | 3394           | 4              | 0.001    |
| 856550 | 1   | 32127089  | 32127089  | C         | A       | COL16A1         | intronic                    | c.3727-30       | e60-30            | tier3 | 39309              | 589                  | 585              | 1                | 0.000      | 27117               | 3296                  | 2237              | 1026              | 0.314       | NA              | NA                | NA            | NA            | NA      | 47593           | 6147              | 6098          | 39            | 0.006   | 69107            | 9132               | 9112           | 11             | 0.001    |
| 856550 | 1   | 115258747 | 115258747 | C         | T       | NRAS            | missense                    | c.35            | p.G12D            | tier1 | 19330              | 438                  | 438              | 0                | 0.000      | 23250               | 2588                  | 1574              | 983               | 0.384       | NA              | NA                | NA            | NA            | NA      | 30695           | 3931              | 3910          | 15            | 0.004   | 37678            | 5089               | 5074           |                |          |



| UPN    | Chr | Start     | Stop      | Reference | Variant | Gene Symbol | Mutation Type               | Coding Position | Amino Acid Change | Tier  | Normal Total Count | Normal Unique Count* | Normal Ref Count | Normal Var Count | Normal VAF | Initial Total Count | Initial Unique Count* | Initial Ref Count | Initial Var Count | Initial VAF | Pre Total Count | Pre Unique Count* | Pre Ref Count | Pre Var Count | Pre VAF | D30 Total Count | D30 Unique Count* | D30 Ref Count | D30 Var Count | D30 VAF | D100 Total Count | D100 Unique Count* | D100 Ref Count | D100 Var Count | D100 VAF |
|--------|-----|-----------|-----------|-----------|---------|-------------|-----------------------------|-----------------|-------------------|-------|--------------------|----------------------|------------------|------------------|------------|---------------------|-----------------------|-------------------|-------------------|-------------|-----------------|-------------------|---------------|---------------|---------|-----------------|-------------------|---------------|---------------|---------|------------------|--------------------|----------------|----------------|----------|
| 876752 | 1   | 207881649 | 207881649 | C         | T       | CR1L        | intronic                    | c.1414+41       | e10+41            | tier4 | 12376              | 1303                 | 1293             | 10               | 0.008      | 10290               | 1023                  | 859               | 163               | 0.159       | 20065           | 2617              | 2138          | 472           | 0.181   | 40890           | 4862              | 4856          | 4             | 0.001   | NA               | NA                 | NA             | NA             | NA       |
| 876752 | 1   | 237947039 | 237947039 | C         | T       | RYR2        | silent                      | c.12045         | p.N4015           | tier1 | 14136              | 1517                 | 1492             | 23               | 0.015      | 10916               | 1151                  | 707               | 435               | 0.381       | 21593           | 2863              | 1626          | 1220          | 0.429   | 38543           | 4556              | 4554          | 1             | 0.000   | NA               | NA                 | NA             | NA             | NA       |
| 876752 | 2   | 233899445 | 233899445 | G         | A       | NEU2        | missense                    | c.821           | p.G274E           | tier1 | 9112               | 875                  | 857              | 17               | 0.019      | 12898               | 1291                  | 718               | 556               | 0.436       | 21521           | 2810              | 1451          | 1320          | 0.476   | 28854           | 3233              | 3230          | 3             | 0.001   | NA               | NA                 | NA             | NA             | NA       |
| 876752 | 3   | 38621021  | 38621021  | C         | T       | SCN5A       | intronic                    | c.3229-35       | e17-35            | tier3 | 12076              | 1090                 | 1072             | 17               | 0.016      | 20091               | 1904                  | 1203              | 673               | 0.359       | 40819           | 4978              | 2975          | 1960          | 0.397   | 67806           | 7261              | 7255          | 1             | 0.000   | NA               | NA                 | NA             | NA             | NA       |
| 876752 | 4   | 82026868  | 82026868  | C         | T       | PRKG2       | intronic                    | c.2063+99       | e15+99            | tier3 | 3984               | 382                  | 377              | 5                | 0.013      | 3323                | 1203                  | 190               | 90                | 0.321       | 7152            | 889               | 499           | 386           | 0.436   | 11741           | 1292              | 1288          | 1             | 0.000   | NA               | NA                 | NA             | NA             | NA       |
| 876752 | 11  | 71373771  | 71373771  | G         | A       | ENPP7P8     | 5_prime_flanking_region     | c.-49015        | NULL              | tier3 | 2648               | 257                  | 254              | 3                | 0.012      | 2703                | 246                   | 142               | 103               | 0.420       | 3880            | 466               | 281           | 182           | 0.393   | 6877            | 829               | 829           | 0             | 0.000   | NA               | NA                 | NA             | NA             | NA       |
| 876752 | 15  | 90631934  | 90631934  | C         | T       | IDH2        | missense                    | c.419           | p.R140Q           | tier1 | 15949              | 1632                 | 1623             | 7                | 0.004      | 19357               | 1889                  | 1838              | 47                | 0.025       | 32590           | 4102              | 3874          | 210           | 0.051   | 58015           | 6552              | 6545          | 5             | 0.001   | NA               | NA                 | NA             | NA             | NA       |
| 876752 | 17  | 6703354   | 6703354   | C         | G       | TEKT1       | missense                    | c.1249          | p.V417L           | tier1 | 20602              | 2173                 | 2143             | 29               | 0.013      | 22234               | 2373                  | 1464              | 880               | 0.375       | 43341           | 5841              | 3302          | 2473          | 0.428   | 77372           | 9235              | 9226          | 2             | 0.000   | NA               | NA                 | NA             | NA             | NA       |
| 876752 | 18  | 47380016  | 47380016  | G         | A       | MYO5B       | silent                      | c.4024          | p.L1342           | tier1 | 18885              | 2141                 | 2113             | 26               | 0.012      | 27633               | 3101                  | 1940              | 1123              | 0.367       | 44704           | 6356              | 3691          | 2602          | 0.413   | 84493           | 10512             | 10501         | 7             | 0.001   | NA               | NA                 | NA             | NA             | NA       |
| 876752 | 19  | 7944301   | 7944301   | G         | A       | FLJ22184    | 5_prime_flanking_region     | c.-5727         | NULL              | tier3 | 10051              | 991                  | 974              | 16               | 0.016      | 13434               | 1233                  | 656               | 569               | 0.464       | 23116           | 2961              | 1442          | 1494          | 0.509   | 33369           | 3719              | 3716          | 1             | 0.000   | NA               | NA                 | NA             | NA             | NA       |
| 876752 | 22  | 21153574  | 21153574  | G         | A       | PI4KA       | splice_region               | c.1821-10       | e16-10            | tier3 | 20389              | 2190                 | 2152             | 36               | 0.016      | 35600               | 3730                  | 2237              | 1429              | 0.390       | 55400           | 7319              | 4134          | 3109          | 0.429   | 95222           | 11027             | 11022         | 4             | 0.000   | NA               | NA                 | NA             | NA             | NA       |
| 882325 | 1   | 112525116 | 112525116 | T         | G       | KCND3       | missense                    | c.233           | p.D78A            | tier1 | 15808              | 1730                 | 1720             | 10               | 0.006      | 13690               | 1496                  | 1073              | 408               | 0.275       | 10699           | 1537              | 1451          | 83            | 0.004   | 22914           | 3036              | 3030          | 1             | 0.000   | NA               | NA                 | NA             | NA             | NA       |
| 882325 | 1   | 228464970 | 228464970 | G         | T       | OBSCN       | missense                    | c.6710          | p.C2237F          | tier1 | 28759              | 3856                 | 3821             | 25               | 0.007      | 34249               | 4299                  | 2788              | 1435              | 0.340       | 23115           | 3128              | 3095          | 29            | 0.009   | 60989           | 8328              | 8321          | 6             | 0.001   | NA               | NA                 | NA             | NA             | NA       |
| 882325 | 1   | 228464971 | 228464971 | T         | A       | OBSCN       | nonsense                    | c.6711          | p.C2237*          | tier1 | 28078              | 3859                 | 3830             | 26               | 0.007      | 33335               | 4255                  | 2712              | 1465              | 0.351       | 22736           | 3116              | 3082          | 27            | 0.009   | 59209           | 8291              | 8280          | 0             | 0.000   | NA               | NA                 | NA             | NA             | NA       |
| 882325 | 2   | 25457242  | 25457242  | C         | T       | DNMT3A      | missense                    | c.2645          | p.R882H           | tier1 | 14740              | 1599                 | 1564             | 30               | 0.019      | 15434               | 1252                  | 1058              | 510               | 0.325       | 10194           | 1368              | 1039          | 326           | 0.239   | 43274           | 5239              | 5220          | 10            | 0.002   | NA               | NA                 | NA             | NA             | NA       |
| 882325 | 2   | 209113112 | 209113112 | C         | A       | IDH1        | 0                           | c.395           | p.R132L           | tier1 | 14745              | 1776                 | 1760             | 7                | 0.004      | 13079               | 1345                  | 881               | 451               | 0.339       | 6426            | 918               | 918           | 0             | 0.000   | 32412           | 4049              | 4039          | 4             | 0.000   | NA               | NA                 | NA             | NA             | NA       |
| 882325 | 2   | 211421474 | 211421474 | C         | T       | CP51        | missense                    | c.35            | p.I121            | tier1 | 5578               | 453                  | 444              | 8                | 0.018      | 5055                | 420                   | 278               | 141               | 0.337       | 3282            | 445               | 417           | 24            | 0.054   | 11043           | 1140              | 1133          | 4             | 0.000   | NA               | NA                 | NA             | NA             | NA       |
| 882325 | 2   | 238253632 | 238253632 | T         | C       | COL6A3      | intronic                    | c.7163-37       | e34-37            | tier3 | 7767               | 770                  | 767              | 2                | 0.003      | 9814                | 852                   | 508               | 332               | 0.395       | 5982            | 824               | 762           | 60            | 0.073   | 11970           | 1487              | 1484          | 0             | 0.000   | NA               | NA                 | NA             | NA             | NA       |
| 882325 | 4   | 170913470 | 170913470 | G         | A       | MFAP3L      | splice_region               | c.299-10        | e2-10             | tier3 | 12788              | 2049                 | 2037             | 9                | 0.004      | 28959               | 3383                  | 2143              | 1198              | 0.359       | 21112           | 3168              | 3119          | 45            | 0.014   | 51199           | 7071              | 7062          | 8             | 0.000   | NA               | NA                 | NA             | NA             | NA       |
| 882325 | 5   | 150923971 | 150923971 | A         | G       | FAT2        | silent                      | c.6717          | p.H2239           | tier1 | 27691              | 3126                 | 3092             | 27               | 0.009      | 23836               | 2373                  | 1519              | 910               | 0.375       | 19691           | 2653              | 2649          | 0             | 0.000   | 37293           | 4773              | 4766          | 0             | 0.000   | NA               | NA                 | NA             | NA             | NA       |
| 882325 | 8   | 54871008  | 54871008  | T         | C       | RG520       | missense                    | c.1157          | p.I386T           | tier1 | 733                | 63                   | 63               | 0                | 0.000      | 2216                | 177                   | 113               | 63                | 0.358       | 1124            | 126               | 125           | 0             | 0.000   | 3504            | 279               | 279           | 0             | 0.000   | NA               | NA                 | NA             | NA             | NA       |
| 882325 | 9   | 139910760 | 139910760 | C         | T       | ABCA2       | missense                    | c.1136          | p.R379Q           | tier1 | 18561              | 2153                 | 2125             | 23               | 0.011      | 33358               | 3630                  | 2244              | 1330              | 0.372       | 23310           | 3091              | 2947          | 138           | 0.045   | 73115           | 9243              | 9222          | 8             | 0.000   | NA               | NA                 | NA             | NA             | NA       |
| 882325 | 11  | 56237381  | 56237381  | A         | G       | OR5M3       | missense                    | c.593           | p.I198T           | tier1 | 15520              | 1706                 | 1693             | 11               | 0.006      | 12600               | 1299                  | 818               | 470               | 0.365       | 13631           | 1794              | 1783          | 10            | 0.006   | 34812           | 4280              | 4278          | 0             | 0.000   | NA               | NA                 | NA             | NA             | NA       |
| 882325 | 11  | 64973991  | 64973991  | C         | G       | CAPN1       | missense                    | c.1411          | p.R471G           | tier1 | 11183              | 1922                 | 1900             | 19               | 0.010      | 19232               | 2256                  | 1386              | 846               | 0.379       | 9760            | 1801              | 1716          | 81            | 0.045   | 35681           | 5415              | 5401          | 10            | 0.000   | NA               | NA                 | NA             | NA             | NA       |
| 882325 | 11  | 89405200  | 89405200  | C         | A       | FOLH1B      | intronic                    | NULL            | NULL              | tier3 | 628                | 70                   | 69               | 0                | 0.000      | 3671                | 315                   | 261               | 52                | 0.166       | 3550            | 473               | 473           | 0             | 0.000   | 11020           | 1296              | 1294          | 0             | 0.000   | NA               | NA                 | NA             | NA             | NA       |
| 882325 | 12  | 21051353  | 21051353  | C         | A       | SLCO1B3     | intronic                    | c.1683-17       | e12-17            | tier2 | 5598               | 552                  | 549              | 1                | 0.002      | 4182                | 404                   | 268               | 135               | 0.335       | 5034            | 660               | 658           | 1             | 0.000   | 7046            | 829               | 828           | 1             | 0.000   | NA               | NA                 | NA             | NA             | NA       |
| 882325 | 12  | 11165648  | 11165648  | G         | A       | CUX2        | intronic                    | c.175-46        | e3-46             | tier3 | 17172              | 2192                 | 2189             | 1                | 0.000      | 14704               | 1479                  | 1078              | 391               | 0.266       | 11151           | 1778              | 1769          | 3             | 0.000   | 37860           | 5161              | 5152          | 3             | 0.000   | NA               | NA                 | NA             | NA             | NA       |
| 882325 | 15  | 33833126  | 33833126  | G         | T       | RYR3        | intronic                    | c.646+35        | e7+35             | tier3 | 10029              | 1150                 | 1144             | 3                | 0.003      | 17877               | 2029                  | 1565              | 446               | 0.222       | 17532           | 2516              | 2513          | 3             | 0.000   | 42068           | 5482              | 5468          | 3             | 0.000   | NA               | NA                 | NA             | NA             | NA       |
| 882325 | 17  | 74732959  | 74732959  | G         | A       | SRSF2       | missense                    | c.284           | p.P95L            | tier1 | 4807               | 550                  | 548              | 2                | 0.004      | 12515               | 1282                  | 949               | 327               | 0.256       | 5526            | 932               | 931           | 1             | 0.000   | 27616           | 3520              | 3520          | 0             | 0.000   | NA               | NA                 | NA             | NA             | NA       |
| 882325 | 18  | 55996142  | 55996142  | G         | A       | NEDD4L      | intronic                    | c.681-85        | e10-85            | tier3 | 27109              | 3159                 | 3142             | 12               | 0.004      | 21948               | 2458                  | 1635              | 785               | 0.324       | 22237           | 3121              | 3115          | 1             | 0.000   | 51693           | 6787              | 6775          | 0             | 0.000   | NA               | NA                 | NA             | NA             | NA       |
| 882325 | 19  | 2435136   | 2435136   | G         | A       | LMNB2       | missense                    | c.718           | p.R240C           | tier1 | 4710               | 463                  | 457              | 6                | 0.013      | 10972               | 1161                  | 671               | 474               | 0.414       | 5908            | 819               | 763           | 51            | 0.063   | 14607           | 1951              | 1945          | 1             | 0.000   | NA               | NA                 | NA             | NA             | NA       |
| 882325 | X   | 50350816  | 50350816  | C         | G       | SHROOM4     | missense                    | c.3326          | p.W1109S          | tier1 | 63                 | 10                   | 9                | 1                | 0.100      | 600                 | 86                    | 21                | 65                | 0.756       | 301             | 74                | 27            | 47            | 0.635   | 623             | 108               | 107           | 1             | 0.000   | NA               | NA                 | NA             | NA             | NA       |
| 882325 | X   | 53441798  | 53441798  | A         | G       | SMC1A       | missense                    | c.320           | p.I107T           | tier1 | 14554              | 1637                 | 1636             | 1                | 0.001      | 16035               | 1652                  | 1478              | 166               | 0.101       | 14576           | 2151              | 2149          | 0             | 0.000   | 41344           | 5491              | 5490          | 0             | 0.000   | NA               | NA                 | NA             | NA             | NA       |
| 882325 | X   | 77911875  | 77911875  | T         | C       | ZCCHC5      | 3_prime_untranslated_region | c.*615          | NULL              | tier2 | 8704               | 1085                 | 1068             | 16               | 0.015      | 6620                | 749                   | 213               | 535               | 0.715       | 7899            | 1036              | 1033          | 2             | 0.000   | 16660           | 2142              | 2141          | 0             | 0.000   | NA               | NA                 | NA             | NA             | NA       |
| 907471 | 1   | 237947546 | 237947546 | C         | T       | RYR2        | silent                      | c.12552         | p.N4184           | tier1 | 6362               | 834                  | 832              | 0                | 0.000      | 12673               | 1284                  | 1225              | 48                | 0.038       | NA              | NA                | NA            | NA            | NA      | 21648           | 2744              | 2739          |               |         |                  |                    |                |                |          |

| UPN    | Chr | Start     | Stop      | Reference | Variant | Gene Symbol     | Mutation Type               | Coding Position | Amino Acid Change | Tier  | Normal Total Count | Normal Unique Count* | Normal Ref Count | Normal Var Count | Normal VAF | Initial Total Count | Initial Unique Count* | Initial Ref Count | Initial Var Count | Initial VAF | Pre Total Count | Pre Unique Count* | Pre Ref Count | Pre Var Count | Pre VAF | D30 Total Count | D30 Unique Count* | D30 Ref Count | D30 Var Count | D30 VAF | D100 Total Count | D100 Unique Count* | D100 Ref Count | D100 Var Count | D100 VAF |
|--------|-----|-----------|-----------|-----------|---------|-----------------|-----------------------------|-----------------|-------------------|-------|--------------------|----------------------|------------------|------------------|------------|---------------------|-----------------------|-------------------|-------------------|-------------|-----------------|-------------------|---------------|---------------|---------|-----------------|-------------------|---------------|---------------|---------|------------------|--------------------|----------------|----------------|----------|
| 918051 | 19  | 39869235  | 39869235  | G         | A       | SAMD4B          | splice_region               | c.1530+6        | e7+6              | tier3 | 6187               | 876                  | 875              | 0                | 0.000      | 4900                | 620                   | 409               | 205               | 0.334       | 2161            | 309               | 231           | 77            | 0.250   | 3344            | 456               | 455           | 0             | 0.000   | NA               | NA                 | NA             | NA             | NA       |
| 918051 | 20  | 1920551   | 1920551   | T         | C       | LOC727993       | 5_prime_flanking_region     | c.-7341         | NULL              | tier2 | 5027               | 531                  | 531              | 0                | 0.000      | 3216                | 295                   | 177               | 117               | 0.398       | 2798            | 245               | 173           | 71            | 0.291   | 5984            | 471               | 470           | 0             | 0.000   | NA               | NA                 | NA             | NA             | NA       |
| 918051 | 20  | 34022502  | 34022502  | G         | A       | GDF5            | silent                      | c.711           | p.A237            | tier1 | 1807               | 321                  | 321              | 0                | 0.000      | 1676                | 223                   | 172               | 51                | 0.229       | 996             | 131               | 107           | 23            | 0.177   | 1868            | 227               | 226           | 0             | 0.000   | NA               | NA                 | NA             | NA             | NA       |
| 918051 | 20  | 44979120  | 44979120  | G         | C       | SLC35C2         | silent                      | c.1098          | p.P366            | tier1 | 15851              | 2109                 | 2102             | 3                | 0.001      | 16967               | 1857                  | 1053              | 780               | 0.426       | 19518           | 2020              | 1321          | 676           | 0.339   | 22750           | 2141              | 2140          | 0             | 0.000   | NA               | NA                 | NA             | NA             | NA       |
| 922185 | 2   | 20100829  | 20100829  | T         | A       | TTC32           | silent                      | c.54            | p.S18             | tier1 | 11579              | 1137                 | 1128             | 9                | 0.008      | 9937                | 1117                  | 898               | 213               | 0.192       | 19306           | 2189              | 1918          | 261           | 0.120   | 28612           | 3370              | 3364          | 0             | 0.000   | 55171            | 6624               | 6615           | 0              | 0.000    |
| 922185 | 2   | 179638759 | 179638759 | A         | G       | TTN             | missense                    | c.7136          | p.V2379A          | tier1 | 6889               | 676                  | 663              | 9                | 0.013      | 8345                | 942                   | 877               | 61                | 0.065       | 11713           | 1237              | 1150          | 82            | 0.067   | 17793           | 1942              | 1932          | 0             | 0.000   | 21615            | 2958               | 2956           | 0              | 0.000    |
| 922185 | 4   | 71463976  | 71463976  | C         | T       | AMBN            | intronic                    | c.136-97        | e4-97             | tier3 | 2122               | 199                  | 194              | 5                | 0.025      | 2936                | 400                   | 339               | 57                | 0.144       | 3839            | 399               | 355           | 44            | 0.110   | 6701            | 928               | 928           | 0             | 0.000   | 4196             | 0                  | 0              | 0              | 0.000    |
| 922185 | 4   | 100544120 | 100544120 | T         | A       | MTTP            | 3_prime_untranslated_region | c.*115          | NULL              | tier3 | 14402              | 1241                 | 1225             | 14               | 0.011      | 12855               | 1228                  | 1031              | 192               | 0.157       | 20965           | 2042              | 1803          | 226           | 0.111   | 31808           | 3270              | 3269          | 0             | 0.000   | 56375            | 7374               | 7357           | 0              | 0.000    |
| 922185 | 5   | 82817833  | 82817833  | C         | T       | VCAN            | silent                      | c.3708          | p.I1236           | tier1 | 1830               | 234                  | 231              | 3                | 0.013      | 3563                | 662                   | 641               | 21                | 0.032       | 3284            | 587               | 562           | 23            | 0.039   | 6046            | 1038              | 1038          | 0             | 0.000   | 832              | 0                  | 0              | 0              | 0.000    |
| 922185 | 5   | 126753323 | 126753323 | C         | T       | MEGF10          | splice_region               | c.1131-7        | e9-7              | tier3 | 16710              | 1905                 | 1877             | 24               | 0.013      | 21308               | 2854                  | 2236              | 593               | 0.210       | 35477           | 4834              | 3994          | 801           | 0.167   | 46324           | 6261              | 6257          | 0             | 0.000   | 52952            | 7682               | 7674           | 0              | 0.000    |
| 922185 | 5   | 137298188 | 137298188 | T         | C       | FAM13B          | intronic                    | c.1180-30       | e9-30             | tier3 | 18640              | 1982                 | 1954             | 25               | 0.013      | 20216               | 2558                  | 1974              | 564               | 0.222       | 32330           | 4085              | 3430          | 622           | 0.154   | 48280           | 6335              | 6330          | 0             | 0.000   | 60373            | 7832               | 7832           | 0              | 0.000    |
| 922185 | 7   | 55241540  | 55241540  | G         | T       | EGFR            | intronic                    | c.2062-74       | e18-74            | tier3 | 14771              | 1690                 | 1668             | 13               | 0.008      | 17884               | 2294                  | 2183              | 109               | 0.048       | 26533           | 3419              | 3199          | 204           | 0.060   | 40671           | 5321              | 5314          | 1             | 0.000   | 39964            | 4525               | 4507           | 0              | 0.000    |
| 922185 | 9   | 111954473 | 111954473 | A         | T       | EPB41L4B        | intronic                    | c.2301+85       | e22+85            | tier3 | 1765               | 168                  | 165              | 3                | 0.018      | 4244                | 648                   | 491               | 157               | 0.242       | 3941            | 521               | 396           | 124           | 0.238   | 6496            | 927               | 926           | 0             | 0.000   | 45               | 0                  | 0              | 0              | 0.000    |
| 922185 | 10  | 126678193 | 126678193 | A         | G       | CTBP2           | missense                    | c.2852          | p.I951T           | tier1 | 1417               | 158                  | 157              | 1                | 0.006      | 2593                | 399                   | 310               | 88                | 0.221       | 2973            | 423               | 341           | 82            | 0.194   | 3829            | 571               | 571           | 0             | 0.000   | 189              | 0                  | 0              | 0              | 0.000    |
| 922185 | 11  | 57970725  | 57970725  | A         | C       | OR1S2           | missense                    | c.929           | p.M310R           | tier1 | 8713               | 826                  | 819              | 6                | 0.007      | 11552               | 1357                  | 1091              | 264               | 0.195       | 18503           | 2051              | 1714          | 334           | 0.163   | 26136           | 3122              | 3120          | 0             | 0.000   | 38939            | 5766               | 5763           | 0              | 0.000    |
| 922185 | 11  | 117340626 | 117340626 | C         | T       | DSCAML1         | silent                      | c.3204          | p.K1068           | tier1 | 37155              | 4197                 | 4166             | 18               | 0.004      | 46284               | 5756                  | 4595              | 1093              | 0.192       | 76183           | 9897              | 8462          | 1339          | 0.137   | 118577          | 15253             | 15249         | 0             | 0.000   | 125825           | 14400              | 14392          | 2              | 0.000    |
| 922185 | 12  | 50026453  | 50026453  | G         | T       | PRPF40B         | 3_prime_untranslated_region | c.*50026453     | NULL              | tier3 | 6993               | 654                  | 645              | 7                | 0.011      | 9349                | 1135                  | 851               | 271               | 0.242       | 15098           | 1631              | 1344          | 275           | 0.170   | 18410           | 2035              | 2032          | 0             | 0.000   | 8904             | 1201               | 1200           | 0              | 0.000    |
| 922185 | 14  | 21968662  | 21968662  | A         | G       | METTL3          | missense                    | c.13709         | p.F427L           | tier1 | 13707              | 1347                 | 1329             | 15               | 0.011      | 13491               | 1612                  | 1209              | 384               | 0.241       | 20059           | 2359              | 1828          | 513           | 0.219   | 28170           | 3281              | 3278          | 0             | 0.000   | 33906            | 4179               | 4169           | 0              | 0.000    |
| 922185 | 14  | 93704243  | 93704243  | T         | C       | BTBD7           | 3_prime_untranslated_region | c.*4376         | NULL              | tier3 | 7080               | 722                  | 718              | 4                | 0.006      | 7552                | 818                   | 612               | 202               | 0.248       | 11852           | 1332              | 1115          | 211           | 0.159   | 16197           | 1803              | 1800          | 0             | 0.000   | 25317            | 3263               | 3261           | 0              | 0.000    |
| 922185 | 15  | 34519872  | 34519872  | A         | C       | EMC4            | 3_prime_untranslated_region | c.*34519872     | NULL              | tier3 | 11316              | 1104                 | 1095             | 8                | 0.007      | 15074               | 1648                  | 1295              | 346               | 0.210       | 35477           | 4834              | 3994          | 801           | 0.167   | 46324           | 6261              | 6257          | 0             | 0.000   | 40071            | 5114               | 5103           | 0              | 0.000    |
| 922185 | 15  | 89386622  | 89386622  | C         | T       | ACAN            | missense                    | c.794           | p.T265I           | tier1 | 16654              | 1641                 | 1620             | 19               | 0.012      | 19660               | 2404                  | 1912              | 472               | 0.198       | 25186           | 2823              | 2371          | 423           | 0.151   | 40121           | 4902              | 4900          | 0             | 0.000   | 24487            | 2915               | 2914           | 0              | 0.000    |
| 922185 | 17  | 15457016  | 15457016  | C         | A       | TVP23C          | missense                    | c.223           | p.D75Y            | tier1 | 2110               | 109                  | 108              | 1                | 0.009      | 2842                | 282                   | 210               | 72                | 0.255       | 4169            | 290               | 243           | 41            | 0.144   | 6808            | 646               | 645           | 0             | 0.000   | 52               | 0                  | 0              | 0              | 0.000    |
| 922185 | 17  | 48668000  | 48668000  | G         | A       | CACNA1G         | intronic                    | c.2453+17       | e10+17            | tier3 | 14549              | 1571                 | 1565             | 3                | 0.002      | 14559               | 1861                  | 1800              | 51                | 0.028       | 25997           | 3267              | 3138          | 123           | 0.038   | 35281           | 4438              | 4436          | 1             | 0.000   | 41143            | 5542               | 5526           | 0              | 0.000    |
| 922185 | 18  | 19781636  | 19781636  | A         | T       | GATA6           | 3_prime_untranslated_region | c.*850          | NULL              | tier2 | 2117               | 193                  | 193              | 0                | 0.000      | 3671                | 420                   | 336               | 84                | 0.200       | 5949            | 643               | 551           | 92            | 0.143   | 8277            | 1001              | 1000          | 0             | 0.000   | 16122            | 2031               | 2029           | 0              | 0.000    |
| 922185 | 18  | 21140392  | 21140392  | G         | A       | NPCL1           | silent                      | p.D228          | tier1             | 9686  | 1881               | 1866                 | 15               | 0.008            | 12398      | 2384                | 2222                  | 158               | 0.066             | 16282       | 3122            | 2822              | 292           | 0.094         | 26447   | 5240            | 5238              | 1             | 0.000         | 38363   | 6161             | 6157               | 0              | 0.000          |          |
| 933226 | 1   | 45798446  | 45798446  | C         | T       | MUTYH           | missense                    | c.565           | p.G189R           | tier1 | 20382              | 2781                 | 2778             | 1                | 0.000      | NA                  | NA                    | NA                | NA                | NA          | 21975           | 583               | 419           | 164           | 0.281   | 7614            | 768               | 768           | 0             | 0.000   | 32898            | 4250               | 4249           | 1              | 0.000    |
| 933226 | 2   | 228512849 | 228512849 | G         | A       | ENSG00000250599 | 5_prime_untranslated_region | c.-228512849    | NULL              | tier3 | 21594              | 3322                 | 3316             | 3                | 0.001      | NA                  | NA                    | NA                | NA                | NA          | 16075           | 434               | 302           | 131           | 0.303   | 5776            | 653               | 651           | 1             | 0.000   | 24762            | 3460               | 3451           | 6              | 0.002    |
| 933226 | 2   | 241976165 | 241976165 | G         | A       | SNED1           | intronic                    | c.806-42        | e5-42             | tier2 | 15789              | 2591                 | 2590             | 1                | 0.000      | NA                  | NA                    | NA                | NA                | NA          | 7177            | 202               | 110           | 92            | 0.455   | 3663            | 434               | 432           | 1             | 0.000   | 14457            | 1932               | 1928           | 1              | 0.000    |
| 933226 | 2   | 242755726 | 242755726 | G         | T       | NEU4            | silent                      | c.84            | p.R28             | tier1 | 17300              | 2427                 | 2423             | 3                | 0.001      | NA                  | NA                    | NA                | NA                | NA          | 11078           | 306               | 222           | 84            | 0.275   | 4801            | 445               | 443           | 2             | 0.000   | 22155            | 2880               | 2872           | 5              | 0.002    |
| 933226 | 3   | 11303055  | 11303055  | C         | T       | HRH1            | 3_prime_untranslated_region | c.*868          | NULL              | tier4 | 12616              | 2006                 | 2003             | 2                | 0.001      | NA                  | NA                    | NA                | NA                | NA          | 6500            | 194               | 124           | 69            | 0.358   | 3807            | 432               | 432           | 0             | 0.000   | 19516            | 2753               | 2747           | 4              | 0.001    |
| 933226 | 3   | 142546497 | 142546497 | G         | A       | ENSG00000240950 | 5_prime_untranslated_region | c.-142546497    | NULL              | tier3 | 6013               | 923                  | 922              | 1                | 0.001      | NA                  | NA                    | NA                | NA                | NA          | 1665            | 57                | 32            | 25            | 0.439   | 1235            | 141               | 140           | 1             | 0.000   | 5351             | 832                | 829            | 1              | 0.000    |
| 933226 | 4   | 665776    | 665776    | G         | T       | PCGF3           | 5_prime_flanking_region     | c.-61694        | NULL              | tier3 | 15308              | 2598                 | 2594             | 1                | 0.000      | NA                  | NA                    | NA                | NA                | NA          | 8845            | 300               | 184           | 116           | 0.387   | 3924            | 0                 | 0             | 0             | 0.000   | 14810            | 2200               | 2199           | 1              | 0.001    |
| 933226 | 4   | 7741871   | 7741871   | C         | T       | SORCS2          | intronic                    | c.3416-56       | e27-56            | tier3 | 23134              | 2962                 | 2960             | 1                | 0.000      | NA                  | NA                    | NA                | NA                | NA          | 18441           | 425               | 252           | 172           | 0.406   | 7996            | 939               | 935           | 3             | 0.003   | 28710            | 3476               | 3469           | 5              | 0.001    |
| 933226 | 4   | 55161723  | 55161723  | G         | A       | PDGFRA          | 3_prime_untranslated_region | c.*284          | NULL              | tier3 | 7931               | 1253                 | 1253             | 0                | 0.000      | NA                  | NA                    | NA                | NA                | NA          | 2852            | 103               | 82            | 21            | 0.204   | 1529            | 169               | 168           | 1             | 0.000   | 8389             | 1228               | 1225           | 1              | 0.000    |
| 933226 | 4   | 187628190 | 187628190 | T         | A       | FAT1            | missense                    | c.2792          | p.N               |       |                    |                      |                  |                  |            |                     |                       |                   |                   |             |                 |                   |               |               |         |                 |                   |               |               |         |                  |                    |                |                |          |



| UPN    | Chr | Start     | Stop      | Reference | Variant | Gene Symbol     | Mutation Type               | Coding Position | Amino Acid Change | Tier  | Normal Total Count | Normal Unique Count* | Normal Ref Count | Normal Var Count | Normal VAF | Initial Total Count | Initial Unique Count* | Initial Ref Count | Initial Var Count | Initial VAF | Pre Total Count | Pre Unique Count* | Pre Ref Count | Pre Var Count | Pre VAF | D30 Total Count | D30 Unique Count* | D30 Ref Count | D30 Var Count | D30 VAF | D100 Total Count | D100 Unique Count* | D100 Ref Count | D100 Var Count | D100 VAF |
|--------|-----|-----------|-----------|-----------|---------|-----------------|-----------------------------|-----------------|-------------------|-------|--------------------|----------------------|------------------|------------------|------------|---------------------|-----------------------|-------------------|-------------------|-------------|-----------------|-------------------|---------------|---------------|---------|-----------------|-------------------|---------------|---------------|---------|------------------|--------------------|----------------|----------------|----------|
| 944541 | 18  | 43684347  | 43684347  | A         | C       | HAUS1           | 5_prime_untranslated_region | c.-31           | NULL              | tier2 | 11027              | 1328                 | 1312             | 12               | 0.009      | 13788               | 1600                  | 957               | 628               | 0.396       | NA              | NA                | NA            | NA            | NA      | 33591           | 3482              | 3479          | 0             | 0.000   | 14203            | 1323               | 1322           | 0              | 0.000    |
| 944541 | 19  | 7964800   | 7964800   | C         | T       | LRRCE8          | missense                    | c.1393          | p.L465F           | tier1 | 5974               | 938                  | 931              | 5                | 0.005      | 7353                | 986                   | 639               | 337               | 0.345       | NA              | NA                | NA            | NA            | NA      | 20434           | 2639              | 2637          | 0             | 0.000   | 8027             | 502                | 502            | 0              | 0.000    |
| 944541 | 19  | 10812636  | 10812636  | T         | C       | QTRT1           | missense                    | c.254           | p.L85P            | tier1 | 23240              | 2829                 | 2816             | 11               | 0.004      | 20901               | 2251                  | 1505              | 713               | 0.321       | NA              | NA                | NA            | NA            | NA      | 6392            | 6388              | 0             | 0.000         | 30292   | 2159             | 2159               | 0              | 0.000          |          |
| 944541 | 22  | 22842205  | 22842205  | G         | C       | ZNF280B         | missense                    | c.1519          | p.L507V           | tier1 | 8650               | 1098                 | 1086             | 9                | 0.008      | 8992                | 942                   | 602               | 333               | 0.356       | NA              | NA                | NA            | NA            | NA      | 23496           | 2451              | 2441          | 1             | 0.000   | 11831            | 980                | 978            | 0              | 0.000    |
| 955252 | 5   | 140563408 | 140563408 | A         | G       | PCDHB16         | missense                    | c.1274          | p.D425G           | tier1 | 19016              | 1999                 | 1995             | 1                | 0.001      | 30781               | 3400                  | 3308              | 86                | 0.025       | 20176           | 2048              | 1993          | 49            | 0.024   | 53519           | 6240              | 6236          | 0             | 0.000   | 69767            | 8440               | 8439           | 0              | 0.000    |
| 988638 | 1   | 46505876  | 46505876  | G         | A       | PIK3R3          | 3_prime_untranslated_region | c.*3469         | NULL              | tier3 | 33975              | 4464                 | 4459             | 3                | 0.001      | 16212               | 1664                  | 1440              | 219               | 0.132       | 19080           | 2465              | 1453          | 1004          | 0.409   | 47391           | 6016              | 6009          | 5             | 0.001   | 74351            | 6783               | 6772           | 7              | 0.001    |
| 988638 | 1   | 161519606 | 161519606 | A         | G       | FCGR3A          | missense                    | c.29            | p.F10S            | tier1 | 9443               | 1261                 | 1248             | 13               | 0.010      | 4771                | 514                   | 392               | 118               | 0.231       | 11339           | 1462              | 834           | 624           | 0.428   | 13636           | 1782              | 1780          | 2             | 0.000   | 13208            | 1274               | 1273           | 0              | 0.000    |
| 988638 | 1   | 233091444 | 233091444 | G         | A       | NTPCR           | missense                    | c.176           | p.R59Q            | tier1 | 217                | 0                    | 0                | 0                | 0.000      | 301                 | 26                    | 24                | 2                 | 0.077       | 194             | 29                | 17            | 12            | 0.414   | 1262            | 114               | 114           | 0             | 0.000   | NA               | NA                 | NA             | NA             | NA       |
| 988638 | 2   | 102484410 | 102484410 | C         | T       | MAP4K4          | rna                         | NULL            | NULL              | tier1 | 23756              | 3338                 | 3337             | 1                | 0.000      | 12674               | 1483                  | 1297              | 181               | 0.122       | 19108           | 2545              | 1527          | 1011          | 0.398   | 36793           | 5089              | 5084          | 4             | 0.001   | 27712            | 2853               | 2848           | 5              | 0.002    |
| 988638 | 2   | 128387436 | 128387436 | A         | G       | MYO7B           | intronic                    | c.4728+35       | e33+35            | tier3 | 45360              | 6579                 | 6575             | 2                | 0.000      | 29056               | 3277                  | 2815              | 439               | 0.135       | 49505           | 6799              | 4037          | 2721          | 0.403   | 81115           | 11019             | 11011         | 4             | 0.000   | 89255            | 8408               | 8388           | 11             | 0.001    |
| 988638 | 2   | 135957920 | 135957920 | T         | C       | ZRANB3          | missense                    | c.3232          | p.K1078E          | tier1 | 9963               | 1257                 | 1240             | 15               | 0.012      | 6748                | 744                   | 590               | 150               | 0.203       | 7880            | 1143              | 676           | 467           | 0.409   | 21453           | 2846              | 2841          | 3             | 0.001   | 22076            | 2352               | 2344           | 2              | 0.000    |
| 988638 | 2   | 192257750 | 192257750 | G         | C       | MYO1B           | intronic                    | c.2077-49       | e19-49            | tier3 | 10356              | 1367                 | 1363             | 0                | 0.000      | 4502                | 481                   | 456               | 25                | 0.052       | 4538            | 710               | 505           | 204           | 0.288   | 15276           | 2111              | 2110          | 0             | 0.000   | 26840            | 2439               | 2437           | 1              | 0.000    |
| 988638 | 2   | 202467998 | 202467998 | C         | A       | ALS2CR11        | missense                    | c.319           | p.V107F           | tier1 | 26814              | 3488                 | 3453             | 34               | 0.010      | 17074               | 1750                  | 1346              | 395               | 0.227       | 21636           | 2900              | 1679          | 1206          | 0.411   | 53474           | 6809              | 6800          | 3             | 0.000   | 90453            | 8383               | 8370           | 9              | 0.001    |
| 988638 | 3   | 55061774  | 55061774  | C         | T       | CACNA2D3        | intronic                    | c.2987+9430     | e35+9430          | tier2 | 8406               | 1406                 | 1405             | 1                | 0.001      | 11215               | 1343                  | 1154              | 181               | 0.136       | 17279           | 2872              | 1659          | 1198          | 0.419   | 36744           | 5437              | 5430          | 3             | 0.000   | 19032            | 1837               | 1833           | 4              | 0.002    |
| 988638 | 3   | 20826548  | 20826548  | G         | T       | SP8             | 5_prime_flanking_region     | c.-131          | NULL              | tier2 | 1843               | 367                  | 367              | 0                | 0.000      | 2386                | 310                   | 272               | 34                | 0.111       | 3879            | 656               | 376           | 278           | 0.425   | 8289            | 1154              | 1150          | 1             | 0.000   | 4661             | 685                | 684            | 0              | 0.000    |
| 988638 | 9   | 44874097  | 44874097  | G         | A       | ENSG00000231454 | 3_prime_untranslated_region | c.*44874097     | NULL              | tier3 | 1723               | 0                    | 0                | 0                | 0.000      | 2207                | 237                   | 194               | 43                | 0.181       | 2353            | 305               | 179           | 124           | 0.409   | 5943            | 772               | 772           | 0             | 0.000   | 4939             | 0                  | 0              | 0              | NA       |
| 988638 | 9   | 128083745 | 128083745 | G         | T       | GAPVD1          | nonsense                    | c.1636          | p.G546*           | tier1 | 22704              | 3267                 | 3230             | 31               | 0.010      | 21985               | 2513                  | 2059              | 438               | 0.175       | 25659           | 3664              | 2598          | 1059          | 0.290   | 63694           | 8641              | 8633          | 3             | 0.000   | 73099            | 7490               | 7478           | 4              | 0.000    |
| 988638 | 10  | 51829388  | 51829388  | C         | T       | FAM21A          | missense                    | c.208           | p.R70W            | tier1 | 8444               | 1026                 | 1023             | 1                | 0.001      | 4290                | 461                   | 381               | 79                | 0.148       | 2797            | 435               | 256           | 179           | 0.411   | 14768           | 1895              | 1894          | 1             | 0.000   | 4954             | 665                | 663            | 1              | 0.000    |
| 988638 | 11  | 5842368   | 5842368   | G         | C       | ORS2N2          | missense                    | c.803           | p.G268A           | tier1 | 5574               | 1335                 | 1332             | 1                | 0.001      | 4387                | 763                   | 660               | 99                | 0.130       | 4901            | 1257              | 722           | 535           | 0.426   | 12603           | 2795              | 2793          | 0             | 0.000   | 1033             | 158                | 158            | 0              | 0.000    |
| 988638 | 12  | 40815079  | 40815079  | G         | A       | MUC19           | rna                         | NULL            | NULL              | tier1 | 811                | 117                  | 117              | 0                | 0.000      | 595                 | 73                    | 66                | 7                 | 0.096       | 575             | 106               | 91            | 15            | 0.142   | 1687            | 252               | 252           | 0             | 0.000   | NA               | NA                 | NA             | NA             | NA       |
| 988638 | 16  | 89650436  | 89650436  | G         | A       | CPNE7           | missense                    | c.658           | p.V220M           | tier1 | 21007              | 3057                 | 3049             | 4                | 0.001      | 10223               | 1196                  | 1027              | 159               | 0.134       | 16016           | 2561              | 1463          | 1091          | 0.427   | 26149           | 3780              | 3771          | 4             | 0.001   | 10693            | 1371               | 1368           | 1              | 0.000    |
| 988638 | 17  | 44074056  | 44074056  | G         | T       | MAPT            | intronic                    | c.1827+26       | e10+26            | tier3 | 13914              | 1839                 | 1819             | 17               | 0.009      | 10418               | 1118                  | 888               | 202               | 0.185       | 15722           | 2272              | 1334          | 904           | 0.404   | 28154           | 3628              | 3620          | 5             | 0.001   | 5472             | 696                | 695            | 1              | 0.000    |
| 988638 | 17  | 74732959  | 74732959  | G         | T       | SRSF2           | missense                    | c.284           | p.P95H            | tier1 | 10311              | 1436                 | 1435             | 1                | 0.001      | 10008               | 1210                  | 1024              | 178               | 0.148       | 20068           | 3093              | 1795          | 1272          | 0.418   | 28552           | 3910              | 3907          | 2             | 0.000   | 482              | 0                  | 0              | 0              | NA       |
| 988638 | 18  | 42531907  | 42531907  | G         | A       | SETBP1          | missense                    | c.2602          | p.D868N           | tier1 | 26792              | 3478                 | 3477             | 0                | 0.000      | 26771               | 3040                  | 2581              | 444               | 0.147       | 47339           | 6331              | 3697          | 2593          | 0.412   | 78462           | 10064             | 10049         | 5             | 0.000   | 77196            | 6858               | 6837           | 13             | 0.002    |
| 988638 | 17  | 7675544   | 7675544   | G         | C       | CAMSAP3         | intronic                    | c.982-42        | e9-42             | tier3 | 13605              | 1826                 | 1799             | 26               | 0.014      | 8017                | 873                   | 656               | 207               | 0.240       | 12692           | 1912              | 1082          | 815           | 0.430   | 22406           | 2906              | 2896          | 1             | 0.000   | 6492             | 676                | 675            | 1              | 0.000    |
| 988638 | 19  | 35265460  | 35265460  | C         | T       | ZNF599          | 5_prime_flanking_region     | c.-1714         | NULL              | tier4 | 2054               | 377                  | 371              | 5                | 0.013      | 1485                | 241                   | 196               | 45                | 0.187       | 2262            | 548               | 311           | 236           | 0.431   | 4699            | 938               | 937           | 1             | 0.000   | 1645             | 193                | 193            | 0              | 0.000    |
| 988638 | 20  | 44815531  | 44815531  | G         | A       | CDH22           | silent                      | c.1479          | p.N493            | tier1 | 24890              | 3995                 | 3945             | 48               | 0.012      | 32926               | 3919                  | 3029              | 837               | 0.217       | 69113           | 9955              | 5755          | 4119          | 0.417   | 101385          | 14575             | 14551         | 12            | 0.001   | 101380           | 10080              | 10049          | 20             | 0.002    |
| 988638 | X   | 14338161  | 14338161  | C         | T       | -               | -                           | -               | -                 | tier3 | 18629              | 2604                 | 2598             | 5                | 0.002      | 9550                | 1070                  | 765               | 300               | 0.282       | 12520           | 1786              | 338           | 1443          | 0.410   | 29780           | 4105              | 4095          | 7             | 0.002   | 39185            | 3787               | 3779           | 7              | 0.002    |
| 991140 | 1   | 181702771 | 181702771 | C         | T       | CACNA1E         | silent                      | c.3147          | p.S1049           | tier1 | 25606              | 3230                 | 3224             | 5                | 0.002      | 31176               | 3713                  | 2869              | 815               | 0.221       | 21422           | 2645              | 2291          | 343           | 0.130   | 43362           | 5206              | 5175          | 29            | 0.006   | 43964            | 4789               | 4781           | 0              | 0.000    |
| 991140 | 1   | 223938499 | 223938499 | C         | T       | CAPN2           | intronic                    | c.814-93        | e7-93             | tier3 | 23839              | 2789                 | 2777             | 10               | 0.004      | 17359               | 1943                  | 1509              | 419               | 0.217       | 22663           | 2695              | 2320          | 361           | 0.135   | 38645           | 4335              | 4307          | 23            | 0.005   | 81316            | 0                  | 0              | 0              | NA       |
| 991140 | 1   | 235926068 | 235926068 | C         | T       | LYST            | missense                    | c.6205          | p.G2069R          | tier1 | 2734               | 284                  | 284              | 0                | 0.000      | 5008                | 510                   | 387               | 117               | 0.232       | 2316            | 237               | 200           | 35            | 0.149   | 7062            | 713               | 707           | 4             | 0.006   | 17007            | 2081               | 2080           | 0              | 0.000    |
| 991140 | 2   | 166187904 | 166187904 | T         | C       | SCN2A           | silent                      | c.2214          | p.I738            | tier1 | 12601              | 1364                 | 1358             | 5                | 0.004      | 7677                | 842                   | 651               | 188               | 0.224       | 8846            | 974               | 888           | 83            | 0.085   | 16189           | 1647              | 1632          | 11            | 0.007   | 43391            | 4861               | 4856           | 0              | 0.000    |
| 991140 | 3   | 116163747 | 116163747 | C         | T       | LSAMP           | silent                      | c.132           | p.R44             | tier1 | 11740              | 1553                 | 1550             | 3                | 0.002      | 32947               | 4167                  | 3195              | 939               | 0.227       | 37323           | 4927              | 4262          | 642           | 0.131   | 61809           | 6830              | 6787          | 40            | 0.006   | 50384            | 5382               | 5378           | 0              | 0.000    |
| 991140 | 3   | 132201248 | 132201248 | C         | T       | DNAIC13         | intronic                    | c.2979+74       | e26+74            | tier3 | 11745              | 1555                 | 1549             | 5                | 0.003      | 4943                | 693                   | 497               | 192               | 0.279       | 10516           | 1420              | 1282          | 135           | 0.095   | 16281           | 2010              | 1994          | 14            | 0.007   | 29503            |                    |                |                |          |

**Table S5. International Prognostic Scoring System-Revised Classification System**

| Score | Cytogenetics | Blast % | Hemoglobin | Platelets | Absolute Neutrophil Count |
|-------|--------------|---------|------------|-----------|---------------------------|
| 0     | Very Good    | ≤2      | ≥10        | ≥100      | ≥0.8                      |
| 0.5   |              |         |            | 50-<100   | <0.8                      |
| 1.0   | Good         | >2-<5   | 8-<10      | <50       |                           |
| 1.5   |              |         | <8         |           |                           |
| 2.0   | Intermediate | 5-10    |            |           |                           |
| 3.0   | Poor         | >10     |            |           |                           |
| 4.0   | Very Poor    |         |            |           |                           |

| Prognostic Subgroups | Cytogenetic abnormalities                                                       |
|----------------------|---------------------------------------------------------------------------------|
| Very Good            | -Y, del(11q)                                                                    |
| Good                 | Normal, del(5q), del(12p), del(20q), double including del(5q)                   |
| Intermediate         | del(7q), +8, +19, i(17q), any other single or double independent clones         |
| Poor                 | -7, inv(3)/t(3q)/del(3q), double including -7/del(7q), complex: 3 abnormalities |
| Very Poor            | Complex:>3 abnormalities                                                        |

| International Prognostic Scoring System-Revised Score | Risk Category | Median Overall Survival (years) | Median time to 25% leukemia evolution (years) |
|-------------------------------------------------------|---------------|---------------------------------|-----------------------------------------------|
| ≤1.5                                                  | Very Low      | 8.8                             | Not reached                                   |
| >1.5-3.0                                              | Low           | 5.3                             | 10.8                                          |
| >3-4.5                                                | Intermediate  | 3.0                             | 3.2                                           |
| >4.5-6                                                | High          | 1.6                             | 1.4                                           |
| >6                                                    | Very High     | 0.8                             | 0.73                                          |

From: Greenberg PL, Tuechler H, Schanz J, Sanz G, Garcia-Manero G, Sole F, et al. Revised international prognostic scoring system for myelodysplastic syndromes. *Blood*. 2012;120(12):2454-65.20(12):2

**Table S6. 40 Gene Panel List**

| <b>Gene symbol</b> | <b>Category</b>           | <b>Target(s)</b>  |
|--------------------|---------------------------|-------------------|
| <i>BRAF</i>        | Activated signaling       | V600E             |
| <i>FLT3</i>        | Activated signaling       | TKD and ITD       |
| <i>JAK2</i>        | Activated signaling       | V617, exon 12     |
| <i>KIT</i>         | Activated signaling       | exons 2, 8-13, 17 |
| <i>KRAS</i>        | Activated signaling       | G12, G13, Q61     |
| <i>MPL</i>         | Activated signaling       | exon 10           |
| <i>NF1</i>         | Activated signaling       | whole gene        |
| <i>NRAS</i>        | Activated signaling       | G12, G13, Q61     |
| <i>PTPN11</i>      | Activated signaling       | exons 3, 13, 14   |
| <i>ASXL1</i>       | Chromatin modifiers       | whole gene        |
| <i>EZH2</i>        | Chromatin modifiers       | whole gene        |
| <i>SUZ12</i>       | Chromatin modifiers       | whole gene        |
| <i>CSF3R</i>       | Chromatin modifiers       | whole gene        |
| <i>RAD21</i>       | Cohesin                   | whole gene        |
| <i>SMC1A</i>       | Cohesin                   | whole gene        |
| <i>SMC3</i>        | Cohesin                   | whole gene        |
| <i>STAG2</i>       | Cohesin                   | whole gene        |
| <i>DNMT3A</i>      | DNA methylation           | whole gene        |
| <i>IDH1</i>        | DNA methylation           | R132              |
| <i>IDH2</i>        | DNA methylation           | R140, R172        |
| <i>TET2</i>        | DNA methylation           | whole gene        |
| <i>CALR</i>        | Other genes               | exon 9            |
| <i>CBL</i>         | Other genes               | exons 8, 9        |
| <i>NPM1</i>        | Other genes               | exon 11           |
| <i>PIGA</i>        | Other genes               | whole gene        |
| <i>PPM1D</i>       | Other genes               | exon 6            |
| <i>CUX1</i>        | Other genes               | whole gene        |
| <i>SF3B1</i>       | Spliceosome               | whole gene        |
| <i>SRSF2</i>       | Spliceosome               | exon 1            |
| <i>U2AF1</i>       | Spliceosome               | exons 2, 6        |
| <i>ZRSR2</i>       | Spliceosome               | whole gene        |
| <i>BCOR</i>        | Transcriptional regulator | whole gene        |
| <i>BCORL1</i>      | Transcriptional regulator | whole gene        |
| <i>CEBPA</i>       | Transcriptional regulator | whole gene        |
| <i>ETV6</i>        | Transcriptional regulator | whole gene        |
| <i>GATA2</i>       | Transcriptional regulator | whole gene        |
| <i>RUNX1</i>       | Transcriptional regulator | whole gene        |
| <i>PHF6</i>        | Tumor suppressors         | whole gene        |
| <i>TP53</i>        | Tumor suppressors         | whole gene        |
| <i>WT1</i>         | Tumor suppressors         | whole gene        |
